# Supplementary material for: Integrated Full-Length Transcriptome and Metabolome Profiling Reveals Flavonoid Regulation in Response to Freezing Stress in Potato
Source: MDPI journal article supplement (doi:10.3390/plants12102054), 2023-05-22
Supplement: s1 [file s1]

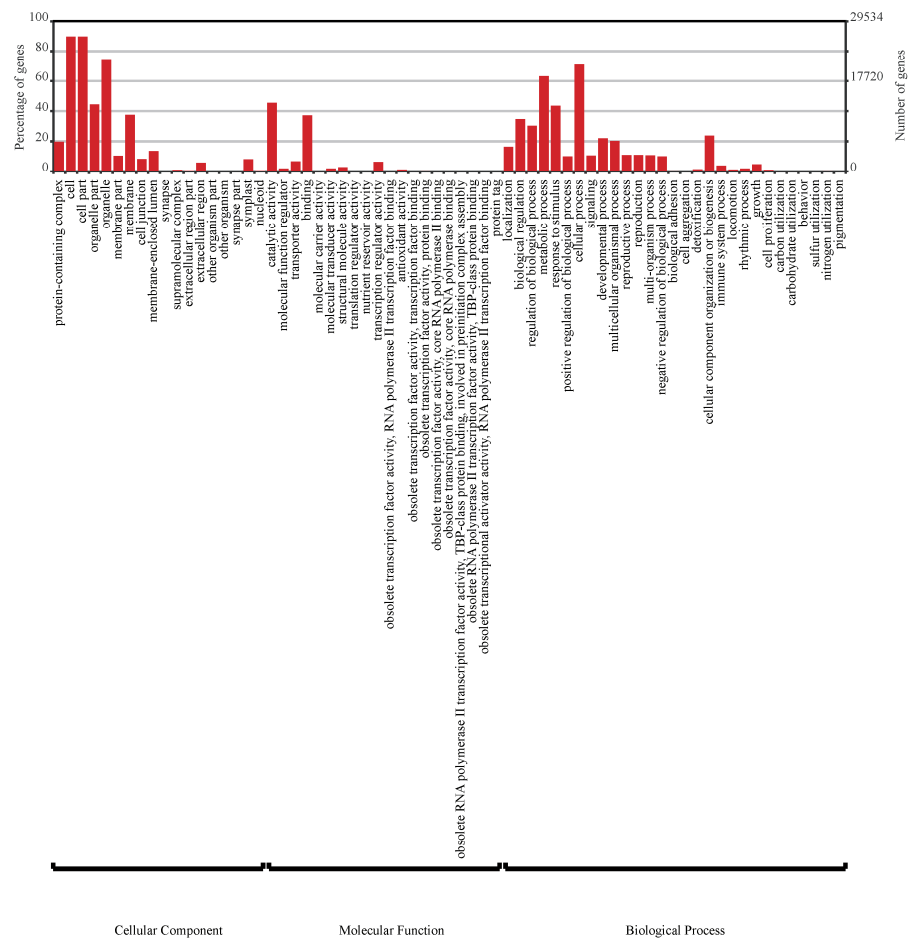

**Figure S1.** GO functional annotation of all the transcripts.

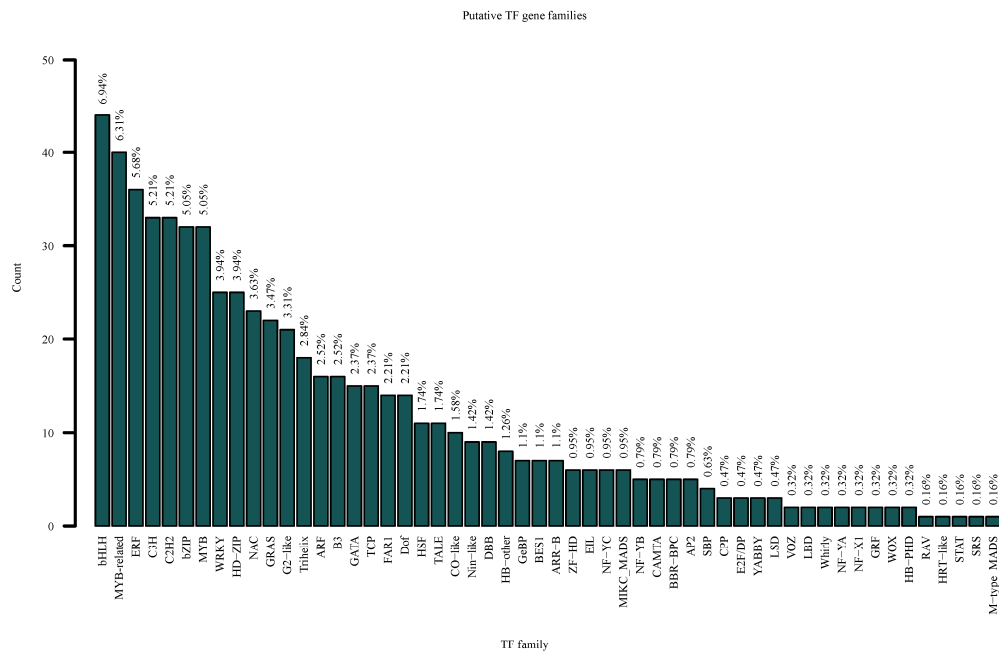

**Figure S2.** Transcription factor family classification.

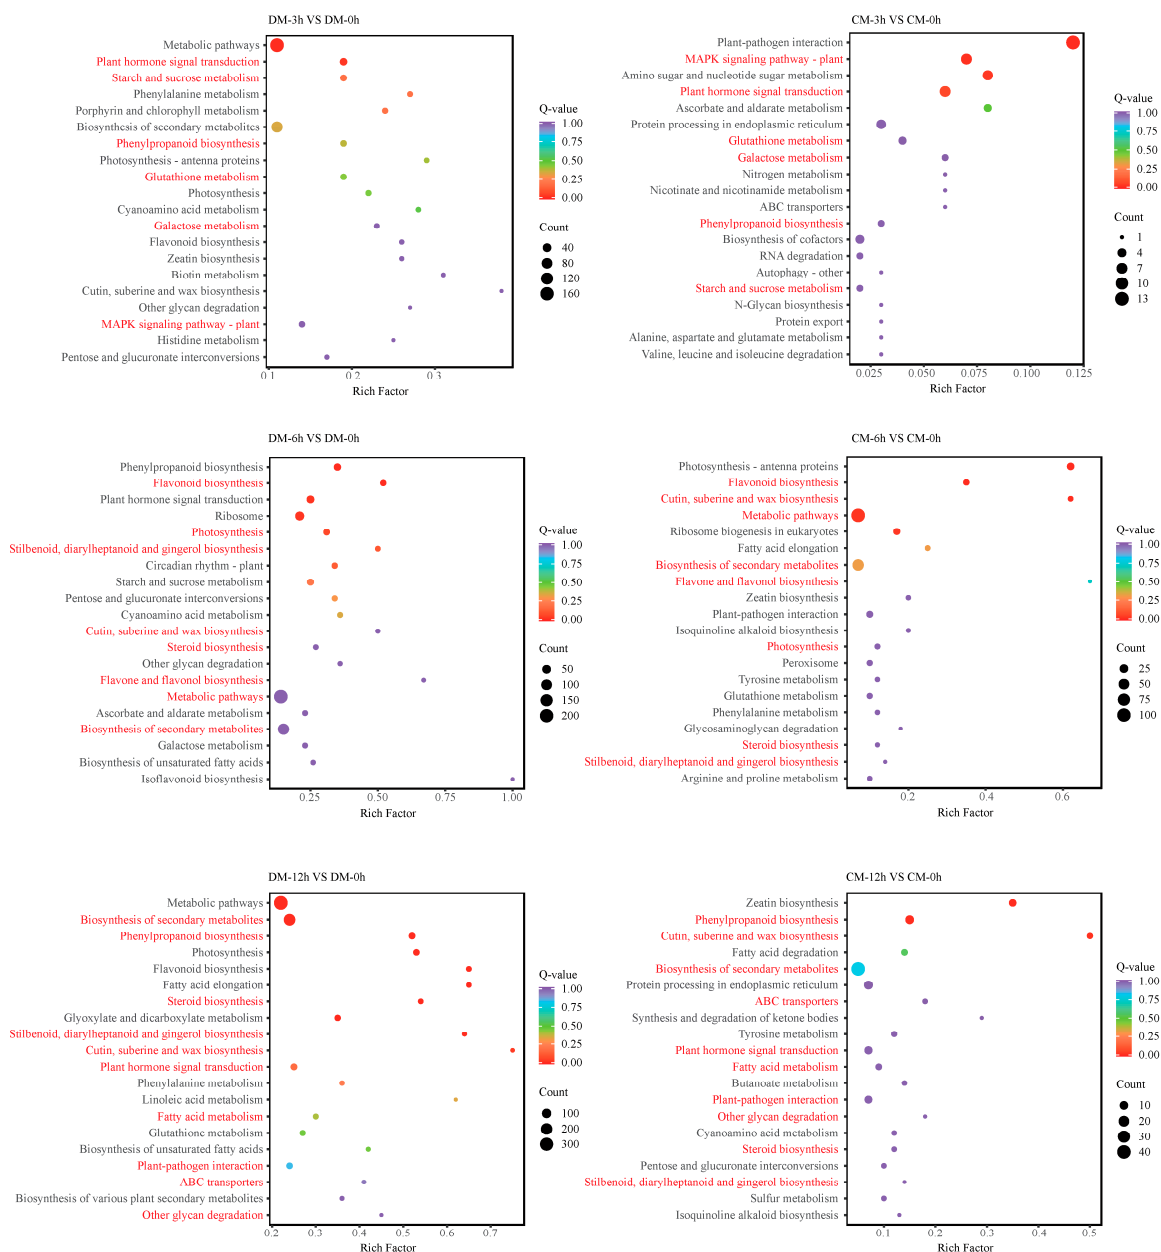

**Figure S3.** KEGG pathway enrichment analysis of the DEGs identified in DM and CM
