# Supplementary material for: Integrated Full-Length Transcriptome and Metabolome Profiling Reveals Flavonoid Regulation in Response to Freezing Stress in Potato
Source: Plants (Basel). 2023 May 22;12(10):2054. doi: 10.3390/plants12102054 (PMC10223400; doi:10.3390/plants12102054)
Supplement: Supplementary file 1 [file plants-12-02054-s001.zip]

Archive with 8 entries (8 files):
- plants-2321875--supplementary figures.pdf
- Table S1.xlsx
- Table S2.xlsx
- Table S3.xlsx
- Table S4.xlsx
- Table S5.xlsx
- Table S6.xlsx
- Table S7.xlsx
