# Supplementary material for: Integrated Full-Length Transcriptome and Metabolome Profiling Reveals Flavonoid Regulation in Response to Freezing Stress in Potato
Source: Plants (Basel). 2023 May 22;12(10):2054. doi: 10.3390/plants12102054 (PMC10223400; doi:10.3390/plants12102054)
Supplement: Supplementary file 1 [file plants-12-02054-s001.zip › Table S1.xlsx]

## Sheet: Sheet1
Table S1: Functional annotation of all transcripts.
ID	KEGG	GO	NT	NT_E-value	NR	NR_E-value	COG	COG_E-value	KOG	KOG_E-value	EggNOG	EggNOG_Evalue	uniprot_sprot	uniprot_sprot_E-value	pfam
PB.1.1	ko:K10756	GO:0005575,GO:0005622,GO:0005623,GO:0005634,GO:0005657,GO:0005663,GO:0005694,GO:0006139,GO:0006259,GO:0006260,GO:0006261,GO:0006275,GO:0006281,GO:0006725,GO:0006807,GO:0006950,GO:0006974,GO:0008150,GO:0008152,GO:0009058,GO:0009059,GO:0009889,GO:0009891,GO:0009893,GO:0009987,GO:0010556,GO:0010557,GO:0010604,GO:0019219,GO:0019222,GO:0031323,GO:0031325,GO:0031326,GO:0031328,GO:0031390,GO:0032991,GO:…	PREDICTED: Solanum tuberosum replication factor C subunit 3 (LOC102603953), transcript variant X2, mRNA	0	replication factor C subunit 3	0	replication factor C small subunit [Methanocella arvoryzae MRE50]	6.33e-34	Replication factor C, subunit RFC5	6.59e-29	COG0470@1|root,KOG2035@2759|Eukaryota,37RVB@33090|Viridiplantae,3GBSA@35493|Streptophyta,44H4G@71274|asterids	3.37e-240	Replication factor C subunit 3 OS=Arabidopsis thaliana OX=3702 GN=RFC3 PE=2 SV=1	0	DNA_pol3_delta2 & AAA
PB.1.2	ko:K10756	GO:0005575,GO:0005622,GO:0005623,GO:0005634,GO:0005657,GO:0005663,GO:0005694,GO:0006139,GO:0006259,GO:0006260,GO:0006261,GO:0006275,GO:0006281,GO:0006725,GO:0006807,GO:0006950,GO:0006974,GO:0008150,GO:0008152,GO:0009058,GO:0009059,GO:0009889,GO:0009891,GO:0009893,GO:0009987,GO:0010556,GO:0010557,GO:0010604,GO:0019219,GO:0019222,GO:0031323,GO:0031325,GO:0031326,GO:0031328,GO:0031390,GO:0032991,GO:…	PREDICTED: Solanum tuberosum replication factor C subunit 3 (LOC102603953), transcript variant X2, mRNA	0	replication factor C subunit 3	0	Replication factor C [Aciduliprofundum boonei T469]	3.72e-40	Replication factor C, subunit RFC5	5.15e-36	COG0470@1|root,KOG2035@2759|Eukaryota,37RVB@33090|Viridiplantae,3GBSA@35493|Streptophyta,44H4G@71274|asterids	3.52e-253	Replication factor C subunit 3 OS=Arabidopsis thaliana OX=3702 GN=RFC3 PE=2 SV=1	0	DNA_pol3_delta2 & AAA
PB.2.1	ko:K01580	GO:0003674,GO:0003824,GO:0004351,GO:0005488,GO:0005515,GO:0005516,GO:0005575,GO:0005622,GO:0005623,GO:0005634,GO:0005737,GO:0005829,GO:0008150,GO:0010035,GO:0010038,GO:0016829,GO:0016830,GO:0016831,GO:0042221,GO:0043226,GO:0043227,GO:0043229,GO:0043231,GO:0044424,GO:0044444,GO:0044464,GO:0046686,GO:0050896	Solanum lycopersicum glutamate decarboxylase isoform3 (GAD3), mRNA	0	hypothetical protein KY284_003805	0	glutamate decarboxylase [Thioflavicoccus mobilis 8321]	1.29e-171	Glutamate decarboxylase/sphingosine phosphate lyase	0	COG0076@1|root,KOG1383@2759|Eukaryota,37PA0@33090|Viridiplantae,3GGE7@35493|Streptophyta,44PVI@71274|asterids	0.0	Glutamate decarboxylase 4 OS=Arabidopsis thaliana OX=3702 GN=GAD4 PE=1 SV=1	0	Pyridoxal_deC
PB.3.1	-	GO:0000302,GO:0003674,GO:0005215,GO:0005451,GO:0005575,GO:0005622,GO:0005623,GO:0005737,GO:0005886,GO:0006810,GO:0006811,GO:0006812,GO:0006813,GO:0006814,GO:0006873,GO:0006885,GO:0006950,GO:0006970,GO:0006979,GO:0008150,GO:0008324,GO:0009507,GO:0009526,GO:0009536,GO:0009628,GO:0009636,GO:0009651,GO:0009941,GO:0009987,GO:0010035,GO:0010351,GO:0010352,GO:0015075,GO:0015077,GO:0015078,GO:0015079,GO:…	PREDICTED: Solanum tuberosum sodium/hydrogen exchanger 8 (LOC102602690), transcript variant X1, mRNA	0	hypothetical protein H5410_000049	0	cyclic nucleotide-binding protein [Chloroherpeton thalassium ATCC 35110]	1.4e-134	#N/A	#N/A	COG0025@1|root,KOG1965@2759|Eukaryota,37RQ7@33090|Viridiplantae,3G72M@35493|Streptophyta,44ICV@71274|asterids	0.0	Sodium/hydrogen exchanger 7 OS=Arabidopsis thaliana OX=3702 GN=NHX7 PE=1 SV=1	0	Na_H_Exchanger
PB.3.2	-	GO:0000302,GO:0003674,GO:0005215,GO:0005451,GO:0005575,GO:0005622,GO:0005623,GO:0005737,GO:0005886,GO:0006810,GO:0006811,GO:0006812,GO:0006813,GO:0006814,GO:0006873,GO:0006885,GO:0006950,GO:0006970,GO:0006979,GO:0008150,GO:0008324,GO:0009507,GO:0009526,GO:0009536,GO:0009628,GO:0009636,GO:0009651,GO:0009941,GO:0009987,GO:0010035,GO:0010351,GO:0010352,GO:0015075,GO:0015077,GO:0015078,GO:0015079,GO:…	PREDICTED: Solanum tuberosum sodium/hydrogen exchanger 8 (LOC102602690), transcript variant X2, mRNA	0	hypothetical protein H5410_000049	0	#N/A	#N/A	#N/A	#N/A	COG0025@1|root,KOG1965@2759|Eukaryota,37RQ7@33090|Viridiplantae,3G72M@35493|Streptophyta,44ICV@71274|asterids	1.04e-182	Sodium/hydrogen exchanger 7 OS=Arabidopsis thaliana OX=3702 GN=NHX7 PE=1 SV=1	9.79e-95	#N/A
PB.4.1	ko:K16732	GO:0003674,GO:0005488,GO:0005515,GO:0005575,GO:0005622,GO:0005623,GO:0005737,GO:0005739,GO:0005856,GO:0008017,GO:0008092,GO:0009524,GO:0009536,GO:0009574,GO:0015630,GO:0015631,GO:0043226,GO:0043227,GO:0043228,GO:0043229,GO:0043231,GO:0043232,GO:0044422,GO:0044424,GO:0044430,GO:0044444,GO:0044446,GO:0044464	PREDICTED: Solanum tuberosum 65-kDa microtubule-associated protein 6-like (LOC102601237), transcript variant X2, mRNA	0	hypothetical protein H5410_000037	0	#N/A	#N/A	Microtubule-associated protein essential for anaphase spindle elongation	2.99e-124	KOG4302@1|root,KOG4302@2759|Eukaryota,37K9T@33090|Viridiplantae,3GF8A@35493|Streptophyta,44MG0@71274|asterids	0.0	65-kDa microtubule-associated protein 6 OS=Arabidopsis thaliana OX=3702 GN=MAP65-6 PE=1 SV=1	0	MAP65_ASE1
PB.4.2	ko:K16732	GO:0003674,GO:0005488,GO:0005515,GO:0005575,GO:0005622,GO:0005623,GO:0005737,GO:0005739,GO:0005856,GO:0008017,GO:0008092,GO:0009524,GO:0009536,GO:0009574,GO:0015630,GO:0015631,GO:0043226,GO:0043227,GO:0043228,GO:0043229,GO:0043231,GO:0043232,GO:0044422,GO:0044424,GO:0044430,GO:0044444,GO:0044446,GO:0044464	PREDICTED: Solanum tuberosum 65-kDa microtubule-associated protein 6-like (LOC102601237), transcript variant X2, mRNA	0	hypothetical protein H5410_000037	0	#N/A	#N/A	Microtubule-associated protein essential for anaphase spindle elongation	2.99e-124	KOG4302@1|root,KOG4302@2759|Eukaryota,37K9T@33090|Viridiplantae,3GF8A@35493|Streptophyta,44MG0@71274|asterids	0.0	65-kDa microtubule-associated protein 6 OS=Arabidopsis thaliana OX=3702 GN=MAP65-6 PE=1 SV=1	0	MAP65_ASE1
PB.4.3	ko:K16732	GO:0003674,GO:0005488,GO:0005515,GO:0005575,GO:0005622,GO:0005623,GO:0005737,GO:0005739,GO:0005856,GO:0008017,GO:0008092,GO:0009524,GO:0009536,GO:0009574,GO:0015630,GO:0015631,GO:0043226,GO:0043227,GO:0043228,GO:0043229,GO:0043231,GO:0043232,GO:0044422,GO:0044424,GO:0044430,GO:0044444,GO:0044446,GO:0044464	PREDICTED: Solanum tuberosum 65-kDa microtubule-associated protein 6-like (LOC102601237), transcript variant X2, mRNA	0	hypothetical protein H5410_000037	0	#N/A	#N/A	Microtubule-associated protein essential for anaphase spindle elongation	1.67e-113	KOG4302@1|root,KOG4302@2759|Eukaryota,37K9T@33090|Viridiplantae,3GF8A@35493|Streptophyta,44MG0@71274|asterids	0.0	65-kDa microtubule-associated protein 6 OS=Arabidopsis thaliana OX=3702 GN=MAP65-6 PE=1 SV=1	0	MAP65_ASE1
PB.4.4	ko:K16732	GO:0003674,GO:0005488,GO:0005515,GO:0005575,GO:0005622,GO:0005623,GO:0005737,GO:0005739,GO:0005856,GO:0008017,GO:0008092,GO:0009524,GO:0009536,GO:0009574,GO:0015630,GO:0015631,GO:0043226,GO:0043227,GO:0043228,GO:0043229,GO:0043231,GO:0043232,GO:0044422,GO:0044424,GO:0044430,GO:0044444,GO:0044446,GO:0044464	PREDICTED: Solanum tuberosum 65-kDa microtubule-associated protein 6-like (LOC102601237), transcript variant X2, mRNA	0	hypothetical protein H5410_000037	0	#N/A	#N/A	Microtubule-associated protein essential for anaphase spindle elongation	2.99e-124	KOG4302@1|root,KOG4302@2759|Eukaryota,37K9T@33090|Viridiplantae,3GF8A@35493|Streptophyta,44MG0@71274|asterids	0.0	65-kDa microtubule-associated protein 6 OS=Arabidopsis thaliana OX=3702 GN=MAP65-6 PE=1 SV=1	0	MAP65_ASE1
PB.5.1	-	GO:0001101,GO:0003674,GO:0003824,GO:0004672,GO:0004674,GO:0004842,GO:0005488,GO:0005515,GO:0005575,GO:0005622,GO:0005623,GO:0005737,GO:0005768,GO:0005769,GO:0005794,GO:0005802,GO:0006464,GO:0006468,GO:0006793,GO:0006796,GO:0006807,GO:0006810,GO:0006950,GO:0006952,GO:0007034,GO:0007154,GO:0007165,GO:0008150,GO:0008152,GO:0009719,GO:0009725,GO:0009737,GO:0009738,GO:0009755,GO:0009787,GO:0009788,GO:…	PREDICTED: Solanum tuberosum E3 ubiquitin-protein ligase KEG (LOC102602127), transcript variant X3, mRNA	0	hypothetical protein H5410_000044	0	serine/threonine protein kinase [Planctomyces brasiliensis DSM 5305]	1.15e-17	MEKK and related serine/threonine protein kinases	0	KOG0198@1|root,KOG0198@2759|Eukaryota,37MI3@33090|Viridiplantae,3GFRR@35493|Streptophyta,44PN7@71274|asterids	0.0	E3 ubiquitin-protein ligase KEG OS=Arabidopsis thaliana OX=3702 GN=KEG PE=1 SV=2	3.95e-29	PK_Tyr_Ser-Thr & Pkinase
PB.5.2	-	GO:0001101,GO:0003674,GO:0003824,GO:0004672,GO:0004674,GO:0004842,GO:0005488,GO:0005515,GO:0005575,GO:0005622,GO:0005623,GO:0005737,GO:0005768,GO:0005769,GO:0005794,GO:0005802,GO:0006464,GO:0006468,GO:0006793,GO:0006796,GO:0006807,GO:0006810,GO:0006950,GO:0006952,GO:0007034,GO:0007154,GO:0007165,GO:0008150,GO:0008152,GO:0009719,GO:0009725,GO:0009737,GO:0009738,GO:0009755,GO:0009787,GO:0009788,GO:…	Solanum tuberosum cultivar Solyntus chromosome 1	0	hypothetical protein H5410_000044	0	#N/A	#N/A	MEKK and related serine/threonine protein kinases	2.59e-95	KOG0198@1|root,KOG0198@2759|Eukaryota,37MI3@33090|Viridiplantae,3GFRR@35493|Streptophyta,44PN7@71274|asterids	6.02e-316	E3 ubiquitin-protein ligase KEG OS=Arabidopsis thaliana OX=3702 GN=KEG PE=1 SV=2	7.79e-11	PK_Tyr_Ser-Thr
PB.5.3	-	GO:0001101,GO:0003674,GO:0003824,GO:0004672,GO:0004674,GO:0004842,GO:0005488,GO:0005515,GO:0005575,GO:0005622,GO:0005623,GO:0005737,GO:0005768,GO:0005769,GO:0005794,GO:0005802,GO:0006464,GO:0006468,GO:0006793,GO:0006796,GO:0006807,GO:0006810,GO:0006950,GO:0006952,GO:0007034,GO:0007154,GO:0007165,GO:0008150,GO:0008152,GO:0009719,GO:0009725,GO:0009737,GO:0009738,GO:0009755,GO:0009787,GO:0009788,GO:…	PREDICTED: Solanum tuberosum E3 ubiquitin-protein ligase KEG (LOC102602127), transcript variant X3, mRNA	0	hypothetical protein H5410_000044	0	serine/threonine protein kinase [Planctomyces brasiliensis DSM 5305]	9.11e-18	MEKK and related serine/threonine protein kinases	0	KOG0198@1|root,KOG0198@2759|Eukaryota,37MI3@33090|Viridiplantae,3GFRR@35493|Streptophyta,44PN7@71274|asterids	0.0	E3 ubiquitin-protein ligase KEG OS=Arabidopsis thaliana OX=3702 GN=KEG PE=1 SV=2	2.42e-29	PK_Tyr_Ser-Thr & Pkinase
PB.5.4	-	GO:0001101,GO:0003674,GO:0003824,GO:0004672,GO:0004674,GO:0004842,GO:0005488,GO:0005515,GO:0005575,GO:0005622,GO:0005623,GO:0005737,GO:0005768,GO:0005769,GO:0005794,GO:0005802,GO:0006464,GO:0006468,GO:0006793,GO:0006796,GO:0006807,GO:0006810,GO:0006950,GO:0006952,GO:0007034,GO:0007154,GO:0007165,GO:0008150,GO:0008152,GO:0009719,GO:0009725,GO:0009737,GO:0009738,GO:0009755,GO:0009787,GO:0009788,GO:…	PREDICTED: Solanum tuberosum E3 ubiquitin-protein ligase KEG (LOC102602127), transcript variant X3, mRNA	0	hypothetical protein H5410_000044	0	serine/threonine protein kinase [Planctomyces brasiliensis DSM 5305]	9.11e-18	MEKK and related serine/threonine protein kinases	0	KOG0198@1|root,KOG0198@2759|Eukaryota,37MI3@33090|Viridiplantae,3GFRR@35493|Streptophyta,44PN7@71274|asterids	0.0	E3 ubiquitin-protein ligase KEG OS=Arabidopsis thaliana OX=3702 GN=KEG PE=1 SV=2	2.42e-29	PK_Tyr_Ser-Thr & Pkinase
PB.5.5	-	GO:0001101,GO:0003674,GO:0003824,GO:0004672,GO:0004674,GO:0004842,GO:0005488,GO:0005515,GO:0005575,GO:0005622,GO:0005623,GO:0005737,GO:0005768,GO:0005769,GO:0005794,GO:0005802,GO:0006464,GO:0006468,GO:0006793,GO:0006796,GO:0006807,GO:0006810,GO:0006950,GO:0006952,GO:0007034,GO:0007154,GO:0007165,GO:0008150,GO:0008152,GO:0009719,GO:0009725,GO:0009737,GO:0009738,GO:0009755,GO:0009787,GO:0009788,GO:…	PREDICTED: Solanum tuberosum E3 ubiquitin-protein ligase KEG (LOC102602127), transcript variant X3, mRNA	0	hypothetical protein H5410_000044	0	serine/threonine protein kinase [Planctomyces brasiliensis DSM 5305]	9.11e-18	MEKK and related serine/threonine protein kinases	0	KOG0198@1|root,KOG0198@2759|Eukaryota,37MI3@33090|Viridiplantae,3GFRR@35493|Streptophyta,44PN7@71274|asterids	0.0	E3 ubiquitin-protein ligase KEG OS=Arabidopsis thaliana OX=3702 GN=KEG PE=1 SV=2	2.42e-29	PK_Tyr_Ser-Thr & Pkinase
PB.5.6	-	GO:0001101,GO:0003674,GO:0003824,GO:0004672,GO:0004674,GO:0004842,GO:0005488,GO:0005515,GO:0005575,GO:0005622,GO:0005623,GO:0005737,GO:0005768,GO:0005769,GO:0005794,GO:0005802,GO:0006464,GO:0006468,GO:0006793,GO:0006796,GO:0006807,GO:0006810,GO:0006950,GO:0006952,GO:0007034,GO:0007154,GO:0007165,GO:0008150,GO:0008152,GO:0009719,GO:0009725,GO:0009737,GO:0009738,GO:0009755,GO:0009787,GO:0009788,GO:…	Solanum tuberosum cultivar Solyntus chromosome 1	0	hypothetical protein H5410_000044	0	#N/A	#N/A	MEKK and related serine/threonine protein kinases	8.38e-91	KOG0198@1|root,KOG0198@2759|Eukaryota,37MI3@33090|Viridiplantae,3GFRR@35493|Streptophyta,44PN7@71274|asterids	3.21e-195	E3 ubiquitin-protein ligase KEG OS=Arabidopsis thaliana OX=3702 GN=KEG PE=1 SV=2	1.47e-11	#N/A
PB.6.1	ko:K08134	GO:0003674,GO:0003824,GO:0005488,GO:0005575,GO:0005622,GO:0005623,GO:0005737,GO:0005783,GO:0006457,GO:0006464,GO:0006807,GO:0008150,GO:0008152,GO:0009987,GO:0012505,GO:0016491,GO:0016705,GO:0016706,GO:0018126,GO:0018193,GO:0018208,GO:0019511,GO:0019538,GO:0019797,GO:0019798,GO:0031543,GO:0031544,GO:0032963,GO:0032991,GO:0036211,GO:0043170,GO:0043226,GO:0043227,GO:0043229,GO:0043231,GO:0043412,GO:…	PREDICTED: Solanum tuberosum prolyl 3-hydroxylase 1 (LOC102600453), transcript variant X1, mRNA	0	hypothetical protein H5410_000035	0	hypothetical protein Swit_0144 [Sphingomonas wittichii RW1]	6.86e-09	#N/A	#N/A	KOG4459@1|root,KOG4459@2759|Eukaryota,37R6K@33090|Viridiplantae,3G9D8@35493|Streptophyta,44FG0@71274|asterids	1.87e-289	Prolyl 3-hydroxylase 1 OS=Gallus gallus OX=9031 GN=P3H1 PE=1 SV=1	1.33e-09	2OG-FeII_Oxy_3
PB.7.1	#N/A	#N/A	#N/A	#N/A	#N/A	#N/A	#N/A	#N/A	#N/A	#N/A	#N/A	#N/A	#N/A	#N/A	#N/A
PB.8.1	ko:K08235	GO:0000003,GO:0003006,GO:0003674,GO:0003824,GO:0007275,GO:0008150,GO:0009791,GO:0009888,GO:0009908,GO:0010087,GO:0010154,GO:0016740,GO:0016757,GO:0016758,GO:0016762,GO:0022414,GO:0032501,GO:0032502,GO:0046527,GO:0048367,GO:0048437,GO:0048438,GO:0048443,GO:0048466,GO:0048608,GO:0048731,GO:0048827,GO:0048856,GO:0061458,GO:0080086,GO:0090567,GO:0099402	PREDICTED: Solanum tuberosum probable xyloglucan endotransglucosylase/hydrolase protein 28 (LOC102599785), mRNA	0	hypothetical protein H5410_000032	0	glycoside hydrolase family protein [Hirschia baltica ATCC 49814]	2.08e-14	0	1.07e-61	COG2273@1|root,2QVQI@2759|Eukaryota,37R18@33090|Viridiplantae,3GB4U@35493|Streptophyta,44BEN@71274|asterids	5.74e-240	Probable xyloglucan endotransglucosylase/hydrolase protein 28 OS=Arabidopsis thaliana OX=3702 GN=XTH28 PE=2 SV=1	4e-167	Glyco_hydro_16 & XET_C
PB.8.2	ko:K08235	GO:0000003,GO:0003006,GO:0003674,GO:0003824,GO:0007275,GO:0008150,GO:0009791,GO:0009888,GO:0009908,GO:0010087,GO:0010154,GO:0016740,GO:0016757,GO:0016758,GO:0016762,GO:0022414,GO:0032501,GO:0032502,GO:0046527,GO:0048367,GO:0048437,GO:0048438,GO:0048443,GO:0048466,GO:0048608,GO:0048731,GO:0048827,GO:0048856,GO:0061458,GO:0080086,GO:0090567,GO:0099402	PREDICTED: Solanum tuberosum probable xyloglucan endotransglucosylase/hydrolase protein 28 (LOC102599785), mRNA	0	hypothetical protein H5410_000032	0	glycoside hydrolase family protein [Hirschia baltica ATCC 49814]	2.08e-14	0	1.07e-61	COG2273@1|root,2QVQI@2759|Eukaryota,37R18@33090|Viridiplantae,3GB4U@35493|Streptophyta,44BEN@71274|asterids	5.74e-240	Probable xyloglucan endotransglucosylase/hydrolase protein 28 OS=Arabidopsis thaliana OX=3702 GN=XTH28 PE=2 SV=1	4e-167	Glyco_hydro_16 & XET_C
PB.8.3	ko:K08235	GO:0000003,GO:0003006,GO:0003674,GO:0003824,GO:0007275,GO:0008150,GO:0009791,GO:0009888,GO:0009908,GO:0010087,GO:0010154,GO:0016740,GO:0016757,GO:0016758,GO:0016762,GO:0022414,GO:0032501,GO:0032502,GO:0046527,GO:0048367,GO:0048437,GO:0048438,GO:0048443,GO:0048466,GO:0048608,GO:0048731,GO:0048827,GO:0048856,GO:0061458,GO:0080086,GO:0090567,GO:0099402	PREDICTED: Solanum tuberosum probable xyloglucan endotransglucosylase/hydrolase protein 28 (LOC102599785), mRNA	0	hypothetical protein H5410_000032	0	glycoside hydrolase family protein [Hirschia baltica ATCC 49814]	2.08e-14	0	1.07e-61	COG2273@1|root,2QVQI@2759|Eukaryota,37R18@33090|Viridiplantae,3GB4U@35493|Streptophyta,44BEN@71274|asterids	5.74e-240	Probable xyloglucan endotransglucosylase/hydrolase protein 28 OS=Arabidopsis thaliana OX=3702 GN=XTH28 PE=2 SV=1	4e-167	Glyco_hydro_16 & XET_C
PB.9.1	-	GO:0001067,GO:0003674,GO:0003676,GO:0003677,GO:0003700,GO:0005488,GO:0005515,GO:0005575,GO:0005622,GO:0005623,GO:0005634,GO:0006082,GO:0006355,GO:0006790,GO:0006807,GO:0008150,GO:0008152,GO:0009787,GO:0009788,GO:0009889,GO:0009966,GO:0009968,GO:0009987,GO:0010468,GO:0010556,GO:0010646,GO:0010648,GO:0016143,GO:0019219,GO:0019222,GO:0019748,GO:0019757,GO:0019760,GO:0023051,GO:0023057,GO:0031323,GO:…	Solanum tuberosum cultivar Solyntus chromosome 1	0	hypothetical protein H5410_000031	0	#N/A	#N/A	0	2.51e-21	2CN59@1|root,2QTY7@2759|Eukaryota,37J0K@33090|Viridiplantae,3GH00@35493|Streptophyta,44J46@71274|asterids	5.41e-173	Zinc finger protein 4 OS=Arabidopsis thaliana OX=3702 GN=ZFP4 PE=2 SV=2	4.65e-46	#N/A
PB.9.2	-	GO:0001067,GO:0003674,GO:0003676,GO:0003677,GO:0003700,GO:0005488,GO:0005515,GO:0005575,GO:0005622,GO:0005623,GO:0005634,GO:0006082,GO:0006355,GO:0006790,GO:0006807,GO:0008150,GO:0008152,GO:0009787,GO:0009788,GO:0009889,GO:0009966,GO:0009968,GO:0009987,GO:0010468,GO:0010556,GO:0010646,GO:0010648,GO:0016143,GO:0019219,GO:0019222,GO:0019748,GO:0019757,GO:0019760,GO:0023051,GO:0023057,GO:0031323,GO:…	Solanum tuberosum cultivar Solyntus chromosome 1	0	hypothetical protein H5410_000031	0	#N/A	#N/A	0	2.51e-21	2CN59@1|root,2QTY7@2759|Eukaryota,37J0K@33090|Viridiplantae,3GH00@35493|Streptophyta,44J46@71274|asterids	5.41e-173	Zinc finger protein 4 OS=Arabidopsis thaliana OX=3702 GN=ZFP4 PE=2 SV=2	4.65e-46	#N/A
PB.9.3	-	GO:0001067,GO:0003674,GO:0003676,GO:0003677,GO:0003700,GO:0005488,GO:0005515,GO:0005575,GO:0005622,GO:0005623,GO:0005634,GO:0006082,GO:0006355,GO:0006790,GO:0006807,GO:0008150,GO:0008152,GO:0009787,GO:0009788,GO:0009889,GO:0009966,GO:0009968,GO:0009987,GO:0010468,GO:0010556,GO:0010646,GO:0010648,GO:0016143,GO:0019219,GO:0019222,GO:0019748,GO:0019757,GO:0019760,GO:0023051,GO:0023057,GO:0031323,GO:…	Solanum tuberosum cultivar Solyntus chromosome 1	0	hypothetical protein H5410_000031	0	#N/A	#N/A	0	2.51e-21	2CN59@1|root,2QTY7@2759|Eukaryota,37J0K@33090|Viridiplantae,3GH00@35493|Streptophyta,44J46@71274|asterids	5.41e-173	Zinc finger protein 4 OS=Arabidopsis thaliana OX=3702 GN=ZFP4 PE=2 SV=2	4.65e-46	#N/A
PB.9.4	-	GO:0001067,GO:0003674,GO:0003676,GO:0003677,GO:0003700,GO:0005488,GO:0005515,GO:0005575,GO:0005622,GO:0005623,GO:0005634,GO:0006082,GO:0006355,GO:0006790,GO:0006807,GO:0008150,GO:0008152,GO:0009787,GO:0009788,GO:0009889,GO:0009966,GO:0009968,GO:0009987,GO:0010468,GO:0010556,GO:0010646,GO:0010648,GO:0016143,GO:0019219,GO:0019222,GO:0019748,GO:0019757,GO:0019760,GO:0023051,GO:0023057,GO:0031323,GO:…	Solanum tuberosum cultivar Solyntus chromosome 1	0	hypothetical protein H5410_000031	0	#N/A	#N/A	0	2.51e-21	2CN59@1|root,2QTY7@2759|Eukaryota,37J0K@33090|Viridiplantae,3GH00@35493|Streptophyta,44J46@71274|asterids	5.41e-173	Zinc finger protein 4 OS=Arabidopsis thaliana OX=3702 GN=ZFP4 PE=2 SV=2	4.65e-46	#N/A
PB.9.5	-	GO:0001067,GO:0003674,GO:0003676,GO:0003677,GO:0003700,GO:0005488,GO:0005515,GO:0005575,GO:0005622,GO:0005623,GO:0005634,GO:0006082,GO:0006355,GO:0006790,GO:0006807,GO:0008150,GO:0008152,GO:0009787,GO:0009788,GO:0009889,GO:0009966,GO:0009968,GO:0009987,GO:0010468,GO:0010556,GO:0010646,GO:0010648,GO:0016143,GO:0019219,GO:0019222,GO:0019748,GO:0019757,GO:0019760,GO:0023051,GO:0023057,GO:0031323,GO:…	Solanum tuberosum cultivar Solyntus chromosome 1	0	hypothetical protein H5410_000031	0	#N/A	#N/A	0	2.51e-21	2CN59@1|root,2QTY7@2759|Eukaryota,37J0K@33090|Viridiplantae,3GH00@35493|Streptophyta,44J46@71274|asterids	5.41e-173	Zinc finger protein 4 OS=Arabidopsis thaliana OX=3702 GN=ZFP4 PE=2 SV=2	4.65e-46	#N/A
PB.10.1	ko:K16055	GO:0003674,GO:0003824,GO:0003825,GO:0004805,GO:0005575,GO:0005622,GO:0005623,GO:0005737,GO:0005975,GO:0005984,GO:0005991,GO:0005992,GO:0006793,GO:0006796,GO:0006950,GO:0008150,GO:0008152,GO:0008194,GO:0009058,GO:0009311,GO:0009312,GO:0009987,GO:0016051,GO:0016311,GO:0016740,GO:0016757,GO:0016758,GO:0016787,GO:0016788,GO:0016791,GO:0019203,GO:0033554,GO:0034637,GO:0035251,GO:0042578,GO:0044237,GO:…	PREDICTED: Solanum tuberosum alpha,alpha-trehalose-phosphate synthase [UDP-forming] 6-like (LOC102597825), transcript variant X3, mRNA	0	hypothetical protein H5410_000021	0	alpha,alpha-trehalose-phosphate synthase (UDP-forming) [Methanoculleus bourgensis MS2]	7.69e-136	Trehalose-6-phosphate synthase component TPS1 and related subunits	9.13e-136	COG1877@1|root,KOG1050@2759|Eukaryota,37ITE@33090|Viridiplantae,3G7U5@35493|Streptophyta,44I4C@71274|asterids	0.0	Alpha,alpha-trehalose-phosphate synthase [UDP-forming] 6 OS=Arabidopsis thaliana OX=3702 GN=TPS6 PE=1 SV=2	0	Glyco_transf_20 & Trehalose_PPase & Hydrolase_3
PB.10.2	ko:K16055	GO:0003674,GO:0003824,GO:0003825,GO:0004805,GO:0005575,GO:0005622,GO:0005623,GO:0005737,GO:0005975,GO:0005984,GO:0005991,GO:0005992,GO:0006793,GO:0006796,GO:0006950,GO:0008150,GO:0008152,GO:0008194,GO:0009058,GO:0009311,GO:0009312,GO:0009987,GO:0016051,GO:0016311,GO:0016740,GO:0016757,GO:0016758,GO:0016787,GO:0016788,GO:0016791,GO:0019203,GO:0033554,GO:0034637,GO:0035251,GO:0042578,GO:0044237,GO:…	PREDICTED: Solanum tuberosum alpha,alpha-trehalose-phosphate synthase [UDP-forming] 6-like (LOC102597825), transcript variant X3, mRNA	0	hypothetical protein H5410_000021	0	alpha,alpha-trehalose-phosphate synthase (UDP-forming) [Methanoculleus bourgensis MS2]	7.69e-136	Trehalose-6-phosphate synthase component TPS1 and related subunits	9.13e-136	COG1877@1|root,KOG1050@2759|Eukaryota,37ITE@33090|Viridiplantae,3G7U5@35493|Streptophyta,44I4C@71274|asterids	0.0	Alpha,alpha-trehalose-phosphate synthase [UDP-forming] 6 OS=Arabidopsis thaliana OX=3702 GN=TPS6 PE=1 SV=2	0	Glyco_transf_20 & Trehalose_PPase & Hydrolase_3
PB.10.3	ko:K16055	GO:0003674,GO:0003824,GO:0003825,GO:0004805,GO:0005575,GO:0005622,GO:0005623,GO:0005737,GO:0005975,GO:0005984,GO:0005991,GO:0005992,GO:0006793,GO:0006796,GO:0006950,GO:0008150,GO:0008152,GO:0008194,GO:0009058,GO:0009311,GO:0009312,GO:0009987,GO:0016051,GO:0016311,GO:0016740,GO:0016757,GO:0016758,GO:0016787,GO:0016788,GO:0016791,GO:0019203,GO:0033554,GO:0034637,GO:0035251,GO:0042578,GO:0044237,GO:…	PREDICTED: Solanum tuberosum alpha,alpha-trehalose-phosphate synthase [UDP-forming] 6-like (LOC102597825), transcript variant X3, mRNA	0	hypothetical protein H5410_000021	0	alpha,alpha-trehalose-phosphate synthase (UDP-forming) [Methanoculleus bourgensis MS2]	7.69e-136	Trehalose-6-phosphate synthase component TPS1 and related subunits	9.13e-136	COG1877@1|root,KOG1050@2759|Eukaryota,37ITE@33090|Viridiplantae,3G7U5@35493|Streptophyta,44I4C@71274|asterids	0.0	Alpha,alpha-trehalose-phosphate synthase [UDP-forming] 6 OS=Arabidopsis thaliana OX=3702 GN=TPS6 PE=1 SV=2	0	Glyco_transf_20 & Trehalose_PPase & Hydrolase_3
PB.10.4	ko:K16055	GO:0003674,GO:0003824,GO:0003825,GO:0004805,GO:0005575,GO:0005622,GO:0005623,GO:0005737,GO:0005975,GO:0005984,GO:0005991,GO:0005992,GO:0006793,GO:0006796,GO:0006950,GO:0008150,GO:0008152,GO:0008194,GO:0009058,GO:0009311,GO:0009312,GO:0009987,GO:0016051,GO:0016311,GO:0016740,GO:0016757,GO:0016758,GO:0016787,GO:0016788,GO:0016791,GO:0019203,GO:0033554,GO:0034637,GO:0035251,GO:0042578,GO:0044237,GO:…	PREDICTED: Solanum tuberosum alpha,alpha-trehalose-phosphate synthase [UDP-forming] 6-like (LOC102597825), transcript variant X3, mRNA	0	hypothetical protein H5410_000021	0	alpha,alpha-trehalose-phosphate synthase (UDP-forming) [Methanoculleus bourgensis MS2]	7.69e-136	Trehalose-6-phosphate synthase component TPS1 and related subunits	9.13e-136	COG1877@1|root,KOG1050@2759|Eukaryota,37ITE@33090|Viridiplantae,3G7U5@35493|Streptophyta,44I4C@71274|asterids	0.0	Alpha,alpha-trehalose-phosphate synthase [UDP-forming] 6 OS=Arabidopsis thaliana OX=3702 GN=TPS6 PE=1 SV=2	0	Glyco_transf_20 & Trehalose_PPase & Hydrolase_3
PB.10.5	ko:K16055	GO:0003674,GO:0003824,GO:0003825,GO:0004805,GO:0005575,GO:0005622,GO:0005623,GO:0005737,GO:0005975,GO:0005984,GO:0005991,GO:0005992,GO:0006793,GO:0006796,GO:0006950,GO:0008150,GO:0008152,GO:0008194,GO:0009058,GO:0009311,GO:0009312,GO:0009987,GO:0016051,GO:0016311,GO:0016740,GO:0016757,GO:0016758,GO:0016787,GO:0016788,GO:0016791,GO:0019203,GO:0033554,GO:0034637,GO:0035251,GO:0042578,GO:0044237,GO:…	PREDICTED: Solanum tuberosum alpha,alpha-trehalose-phosphate synthase [UDP-forming] 6-like (LOC102597825), transcript variant X3, mRNA	0	hypothetical protein H5410_000021	0	alpha,alpha-trehalose-phosphate synthase (UDP-forming) [Methanoculleus bourgensis MS2]	7.69e-136	Trehalose-6-phosphate synthase component TPS1 and related subunits	9.13e-136	COG1877@1|root,KOG1050@2759|Eukaryota,37ITE@33090|Viridiplantae,3G7U5@35493|Streptophyta,44I4C@71274|asterids	0.0	Alpha,alpha-trehalose-phosphate synthase [UDP-forming] 6 OS=Arabidopsis thaliana OX=3702 GN=TPS6 PE=1 SV=2	0	Glyco_transf_20 & Trehalose_PPase & Hydrolase_3
PB.10.6	ko:K16055	GO:0003674,GO:0003824,GO:0003825,GO:0004805,GO:0005575,GO:0005622,GO:0005623,GO:0005737,GO:0005975,GO:0005984,GO:0005991,GO:0005992,GO:0006793,GO:0006796,GO:0006950,GO:0008150,GO:0008152,GO:0008194,GO:0009058,GO:0009311,GO:0009312,GO:0009987,GO:0016051,GO:0016311,GO:0016740,GO:0016757,GO:0016758,GO:0016787,GO:0016788,GO:0016791,GO:0019203,GO:0033554,GO:0034637,GO:0035251,GO:0042578,GO:0044237,GO:…	PREDICTED: Solanum tuberosum alpha,alpha-trehalose-phosphate synthase [UDP-forming] 6-like (LOC102597825), transcript variant X3, mRNA	0	hypothetical protein H5410_000021	0	alpha,alpha-trehalose-phosphate synthase (UDP-forming) [Methanoculleus bourgensis MS2]	7.69e-136	Trehalose-6-phosphate synthase component TPS1 and related subunits	9.13e-136	COG1877@1|root,KOG1050@2759|Eukaryota,37ITE@33090|Viridiplantae,3G7U5@35493|Streptophyta,44I4C@71274|asterids	0.0	Alpha,alpha-trehalose-phosphate synthase [UDP-forming] 6 OS=Arabidopsis thaliana OX=3702 GN=TPS6 PE=1 SV=2	0	Glyco_transf_20 & Trehalose_PPase & Hydrolase_3
PB.11.1	ko:K08360	GO:0003674,GO:0003824,GO:0008150,GO:0008152,GO:0016491,GO:0055114	PREDICTED: Solanum tuberosum probable transmembrane ascorbate ferrireductase 3 (LOC102605721), mRNA	0	PREDICTED: probable transmembrane ascorbate ferrireductase 3	2.16e-160	#N/A	#N/A	Cytochrome b	7.84e-48	KOG1619@1|root,KOG1619@2759|Eukaryota,37P5H@33090|Viridiplantae,3GBUY@35493|Streptophyta,44JIS@71274|asterids	1.05e-148	Probable transmembrane ascorbate ferrireductase 3 OS=Arabidopsis thaliana OX=3702 GN=CYB561C PE=2 SV=1	6.58e-75	Cytochrom_B561
PB.12.1	ko:K00928	-	PREDICTED: Solanum tuberosum aspartokinase 2, chloroplastic-like (LOC102596625), transcript variant X2, mRNA	0	hypothetical protein H5410_000016	0	aspartate kinase III [Chloroherpeton thalassium ATCC 35110]	5.65e-80	Aspartate kinase	0	COG0527@1|root,KOG0456@2759|Eukaryota,37J4Y@33090|Viridiplantae,3GBKM@35493|Streptophyta,44I4Y@71274|asterids	2.03e-259	Aspartokinase 1, chloroplastic OS=Arabidopsis thaliana OX=3702 GN=AK1 PE=1 SV=1	0	AA_kinase
PB.12.2	ko:K00928	-	PREDICTED: Solanum tuberosum aspartokinase 2, chloroplastic-like (LOC102596625), transcript variant X2, mRNA	0	hypothetical protein KY289_000025	0	aspartate kinase III [Chloroherpeton thalassium ATCC 35110]	4.31e-92	Aspartate kinase	0	COG0527@1|root,KOG0456@2759|Eukaryota,37J4Y@33090|Viridiplantae,3GBKM@35493|Streptophyta,44I4Y@71274|asterids	0.0	Aspartokinase 1, chloroplastic OS=Arabidopsis thaliana OX=3702 GN=AK1 PE=1 SV=1	0	AA_kinase
PB.12.3	ko:K00928	-	PREDICTED: Solanum tuberosum aspartokinase 2, chloroplastic-like (LOC102596625), transcript variant X2, mRNA	0	hypothetical protein KY289_000025	0	aspartate kinase III [Chloroherpeton thalassium ATCC 35110]	6.08e-92	Aspartate kinase	0	COG0527@1|root,KOG0456@2759|Eukaryota,37J4Y@33090|Viridiplantae,3GBKM@35493|Streptophyta,44I4Y@71274|asterids	0.0	Aspartokinase 1, chloroplastic OS=Arabidopsis thaliana OX=3702 GN=AK1 PE=1 SV=1	0	AA_kinase
PB.12.4	ko:K00928	-	PREDICTED: Solanum tuberosum aspartokinase 2, chloroplastic-like (LOC102596625), transcript variant X1, mRNA	0	hypothetical protein KY289_000025	0	aspartate kinase [Haliangium ochraceum DSM 14365]	4.77e-81	Aspartate kinase	0	COG0527@1|root,KOG0456@2759|Eukaryota,37J4Y@33090|Viridiplantae,3GBKM@35493|Streptophyta,44I4Y@71274|asterids	1.62e-311	Aspartokinase 1, chloroplastic OS=Arabidopsis thaliana OX=3702 GN=AK1 PE=1 SV=1	0	AA_kinase
PB.12.5	ko:K00928	-	PREDICTED: Solanum tuberosum aspartokinase 2, chloroplastic-like (LOC102596625), transcript variant X2, mRNA	0	hypothetical protein KY289_000025	0	aspartate kinase III [Chloroherpeton thalassium ATCC 35110]	4.31e-92	Aspartate kinase	0	COG0527@1|root,KOG0456@2759|Eukaryota,37J4Y@33090|Viridiplantae,3GBKM@35493|Streptophyta,44I4Y@71274|asterids	0.0	Aspartokinase 1, chloroplastic OS=Arabidopsis thaliana OX=3702 GN=AK1 PE=1 SV=1	0	AA_kinase
PB.12.6	ko:K00928	-	PREDICTED: Solanum tuberosum aspartokinase 2, chloroplastic-like (LOC102596625), transcript variant X1, mRNA	0	hypothetical protein KY289_000025	0	aspartate kinase III [Chloroherpeton thalassium ATCC 35110]	1.18e-91	Aspartate kinase	0	COG0527@1|root,KOG0456@2759|Eukaryota,37J4Y@33090|Viridiplantae,3GBKM@35493|Streptophyta,44I4Y@71274|asterids	0.0	Aspartokinase 2, chloroplastic OS=Arabidopsis thaliana OX=3702 GN=AK2 PE=1 SV=2	0	AA_kinase
PB.12.7	ko:K00928	-	PREDICTED: Solanum tuberosum aspartokinase 2, chloroplastic-like (LOC102596625), transcript variant X1, mRNA	0	hypothetical protein KY289_000025	0	aspartate kinase III [Chloroherpeton thalassium ATCC 35110]	1.19e-91	Aspartate kinase	0	COG0527@1|root,KOG0456@2759|Eukaryota,37J4Y@33090|Viridiplantae,3GBKM@35493|Streptophyta,44I4Y@71274|asterids	0.0	Aspartokinase 2, chloroplastic OS=Arabidopsis thaliana OX=3702 GN=AK2 PE=1 SV=2	0	AA_kinase
PB.12.8	ko:K00928	-	PREDICTED: Solanum tuberosum aspartokinase 2, chloroplastic-like (LOC102596625), transcript variant X1, mRNA	0	hypothetical protein KY289_000025	0	aspartate kinase III [Chloroherpeton thalassium ATCC 35110]	1.19e-91	Aspartate kinase	0	COG0527@1|root,KOG0456@2759|Eukaryota,37J4Y@33090|Viridiplantae,3GBKM@35493|Streptophyta,44I4Y@71274|asterids	0.0	Aspartokinase 2, chloroplastic OS=Arabidopsis thaliana OX=3702 GN=AK2 PE=1 SV=2	0	AA_kinase
PB.12.9	ko:K00928	-	PREDICTED: Solanum tuberosum aspartokinase 2, chloroplastic-like (LOC102596625), transcript variant X2, mRNA	0	hypothetical protein H5410_000016	0	aspartate kinase [Sorangium cellulosum So0157-2]	1.88e-84	Aspartate kinase	0	COG0527@1|root,KOG0456@2759|Eukaryota,37J4Y@33090|Viridiplantae,3GBKM@35493|Streptophyta,44I4Y@71274|asterids	6.44e-307	Aspartokinase 1, chloroplastic OS=Arabidopsis thaliana OX=3702 GN=AK1 PE=1 SV=1	0	AA_kinase
PB.12.10	ko:K00928	-	PREDICTED: Solanum tuberosum aspartokinase 2, chloroplastic-like (LOC102596625), transcript variant X2, mRNA	0	hypothetical protein H5410_000016	0	aspartate kinase [Sorangium cellulosum So0157-2]	3.78e-84	Aspartate kinase	0	COG0527@1|root,KOG0456@2759|Eukaryota,37J4Y@33090|Viridiplantae,3GBKM@35493|Streptophyta,44I4Y@71274|asterids	3.52e-276	Aspartokinase 1, chloroplastic OS=Arabidopsis thaliana OX=3702 GN=AK1 PE=1 SV=1	0	AA_kinase
PB.12.11	ko:K00928	-	PREDICTED: Solanum tuberosum aspartokinase 2, chloroplastic-like (LOC102596625), transcript variant X2, mRNA	0	hypothetical protein H5410_000016	0	aspartate kinase III [Chloroherpeton thalassium ATCC 35110]	6.52e-71	Aspartate kinase	0	COG0527@1|root,KOG0456@2759|Eukaryota,37J4Y@33090|Viridiplantae,3GBKM@35493|Streptophyta,44I4Y@71274|asterids	3.2e-211	Aspartokinase 1, chloroplastic OS=Arabidopsis thaliana OX=3702 GN=AK1 PE=1 SV=1	0	AA_kinase
PB.13.1	ko:K13459,ko:K13460,ko:K20599	GO:0005575,GO:0005623,GO:0005886,GO:0006950,GO:0006952,GO:0007154,GO:0007165,GO:0008150,GO:0009987,GO:0016020,GO:0023052,GO:0044464,GO:0050789,GO:0050794,GO:0050896,GO:0051716,GO:0065007,GO:0071944	Solanum tuberosum cultivar Solyntus chromosome 1	7.93e-157	PREDICTED: putative disease resistance RPP13-like protein 3	5.31e-65	#N/A	#N/A	Apoptotic ATPase	2.89e-15	KOG4658@1|root,KOG4658@2759|Eukaryota,37R5S@33090|Viridiplantae,3GG27@35493|Streptophyta,44QVU@71274|asterids	1.42e-19	Putative disease resistance RPP13-like protein 3 OS=Arabidopsis thaliana OX=3702 GN=RPP13L3 PE=3 SV=1	3.23e-14	NB-ARC
PB.14.1	ko:K00133	-	PREDICTED: Solanum tuberosum aspartate-semialdehyde dehydrogenase (LOC102596301), mRNA	0	PREDICTED: aspartate-semialdehyde dehydrogenase	0	aspartate-semialdehyde dehydrogenase [Phycisphaera mikurensis NBRC 102666]	1.18e-146	#N/A	#N/A	COG0136@1|root,KOG4777@2759|Eukaryota,37QRJ@33090|Viridiplantae,3GG3F@35493|Streptophyta,44FMI@71274|asterids	5.55e-273	Aspartate-semialdehyde dehydrogenase OS=Synechocystis sp. (strain PCC 6803 / Kazusa) OX=1111708 GN=asd PE=3 SV=2	1.55e-125	Semialdhyde_dh & Semialdhyde_dhC
PB.15.1	-	-	PREDICTED: Solanum tuberosum microtubule-associated protein 70-2-like (LOC102592543), mRNA	0	PREDICTED: microtubule-associated protein 70-2-like	0	#N/A	#N/A	#N/A	#N/A	28M6G@1|root,2QTPA@2759|Eukaryota,37I19@33090|Viridiplantae,3GET2@35493|Streptophyta,44NAA@71274|asterids	0.0	Microtubule-associated protein 70-2 OS=Arabidopsis thaliana OX=3702 GN=MAP70.2 PE=1 SV=1	0	MAP70
PB.15.2	-	-	PREDICTED: Solanum tuberosum microtubule-associated protein 70-2-like (LOC102592543), mRNA	0	PREDICTED: microtubule-associated protein 70-2-like	0	#N/A	#N/A	#N/A	#N/A	28M6G@1|root,2QTPA@2759|Eukaryota,37I19@33090|Viridiplantae,3GET2@35493|Streptophyta,44NAA@71274|asterids	0.0	Microtubule-associated protein 70-2 OS=Arabidopsis thaliana OX=3702 GN=MAP70.2 PE=1 SV=1	0	MAP70
PB.15.3	-	-	PREDICTED: Solanum tuberosum microtubule-associated protein 70-2-like (LOC102592543), mRNA	0	PREDICTED: microtubule-associated protein 70-2-like	0	#N/A	#N/A	#N/A	#N/A	28M6G@1|root,2QTPA@2759|Eukaryota,37I19@33090|Viridiplantae,3GET2@35493|Streptophyta,44NAA@71274|asterids	0.0	Microtubule-associated protein 70-2 OS=Arabidopsis thaliana OX=3702 GN=MAP70.2 PE=1 SV=1	0	MAP70
PB.16.1	ko:K12116	GO:0005575,GO:0005622,GO:0005623,GO:0005634,GO:0005737,GO:0006355,GO:0007623,GO:0008150,GO:0009314,GO:0009416,GO:0009628,GO:0009637,GO:0009889,GO:0009909,GO:0009911,GO:0010468,GO:0010556,GO:0019219,GO:0019222,GO:0031323,GO:0031326,GO:0043226,GO:0043227,GO:0043229,GO:0043231,GO:0044424,GO:0044464,GO:0048511,GO:0048518,GO:0048580,GO:0048582,GO:0048831,GO:0050789,GO:0050793,GO:0050794,GO:0050896,GO:…	PREDICTED: Solanum tuberosum adagio protein 3 (LOC102593553), mRNA	0	hypothetical protein KY289_000041	0	bacterio-opsin activator [Natronomonas pharaonis DSM 2160]	4.37e-21	Kelch repeat-containing proteins	6.51e-31	28PPM@1|root,2QWBU@2759|Eukaryota,37R71@33090|Viridiplantae,3GFH6@35493|Streptophyta,44GD0@71274|asterids	0.0	Adagio protein 3 OS=Arabidopsis thaliana OX=3702 GN=ADO3 PE=1 SV=1	0	PAS_9 & PAS & PAS_4 & PAS_3 & Kelch_4 & Kelch_3
PB.16.2	ko:K12116	GO:0005575,GO:0005622,GO:0005623,GO:0005634,GO:0005737,GO:0006355,GO:0007623,GO:0008150,GO:0009314,GO:0009416,GO:0009628,GO:0009637,GO:0009889,GO:0009909,GO:0009911,GO:0010468,GO:0010556,GO:0019219,GO:0019222,GO:0031323,GO:0031326,GO:0043226,GO:0043227,GO:0043229,GO:0043231,GO:0044424,GO:0044464,GO:0048511,GO:0048518,GO:0048580,GO:0048582,GO:0048831,GO:0050789,GO:0050793,GO:0050794,GO:0050896,GO:…	PREDICTED: Solanum tuberosum adagio protein 3 (LOC102593553), mRNA	0	hypothetical protein KY289_000041	0	bacterio-opsin activator [Natronomonas pharaonis DSM 2160]	5.14e-21	Kelch repeat-containing proteins	7.64e-31	28PPM@1|root,2QWBU@2759|Eukaryota,37R71@33090|Viridiplantae,3GFH6@35493|Streptophyta,44GD0@71274|asterids	0.0	Adagio protein 3 OS=Arabidopsis thaliana OX=3702 GN=ADO3 PE=1 SV=1	0	PAS_9 & PAS & PAS_4 & PAS_3 & Kelch_4 & Kelch_3
PB.16.3	ko:K12116	GO:0005575,GO:0005622,GO:0005623,GO:0005634,GO:0005737,GO:0006355,GO:0007623,GO:0008150,GO:0009314,GO:0009416,GO:0009628,GO:0009637,GO:0009889,GO:0009909,GO:0009911,GO:0010468,GO:0010556,GO:0019219,GO:0019222,GO:0031323,GO:0031326,GO:0043226,GO:0043227,GO:0043229,GO:0043231,GO:0044424,GO:0044464,GO:0048511,GO:0048518,GO:0048580,GO:0048582,GO:0048831,GO:0050789,GO:0050793,GO:0050794,GO:0050896,GO:…	PREDICTED: Solanum tuberosum adagio protein 3 (LOC102593553), mRNA	0	hypothetical protein KY289_000041	0	bacterio-opsin activator [Natronomonas pharaonis DSM 2160]	4.37e-21	Kelch repeat-containing proteins	6.51e-31	28PPM@1|root,2QWBU@2759|Eukaryota,37R71@33090|Viridiplantae,3GFH6@35493|Streptophyta,44GD0@71274|asterids	0.0	Adagio protein 3 OS=Arabidopsis thaliana OX=3702 GN=ADO3 PE=1 SV=1	0	PAS_9 & PAS & PAS_4 & PAS_3 & Kelch_4 & Kelch_3
PB.16.4	ko:K12116	GO:0005575,GO:0005622,GO:0005623,GO:0005634,GO:0005737,GO:0006355,GO:0007623,GO:0008150,GO:0009314,GO:0009416,GO:0009628,GO:0009637,GO:0009889,GO:0009909,GO:0009911,GO:0010468,GO:0010556,GO:0019219,GO:0019222,GO:0031323,GO:0031326,GO:0043226,GO:0043227,GO:0043229,GO:0043231,GO:0044424,GO:0044464,GO:0048511,GO:0048518,GO:0048580,GO:0048582,GO:0048831,GO:0050789,GO:0050793,GO:0050794,GO:0050896,GO:…	PREDICTED: Solanum tuberosum adagio protein 3 (LOC102593553), mRNA	0	hypothetical protein KY289_000041	0	bacterio-opsin activator [Natronomonas pharaonis DSM 2160]	5.14e-21	Kelch repeat-containing proteins	7.64e-31	28PPM@1|root,2QWBU@2759|Eukaryota,37R71@33090|Viridiplantae,3GFH6@35493|Streptophyta,44GD0@71274|asterids	0.0	Adagio protein 3 OS=Arabidopsis thaliana OX=3702 GN=ADO3 PE=1 SV=1	0	PAS_9 & PAS & PAS_4 & PAS_3 & Kelch_4 & Kelch_3
PB.16.5	ko:K12116	GO:0005575,GO:0005622,GO:0005623,GO:0005634,GO:0005737,GO:0006355,GO:0007623,GO:0008150,GO:0009314,GO:0009416,GO:0009628,GO:0009637,GO:0009889,GO:0009909,GO:0009911,GO:0010468,GO:0010556,GO:0019219,GO:0019222,GO:0031323,GO:0031326,GO:0043226,GO:0043227,GO:0043229,GO:0043231,GO:0044424,GO:0044464,GO:0048511,GO:0048518,GO:0048580,GO:0048582,GO:0048831,GO:0050789,GO:0050793,GO:0050794,GO:0050896,GO:…	PREDICTED: Solanum tuberosum adagio protein 3 (LOC102593553), mRNA	0	hypothetical protein KY289_000041	0	bacterio-opsin activator [Natronomonas pharaonis DSM 2160]	4.37e-21	Kelch repeat-containing proteins	6.51e-31	28PPM@1|root,2QWBU@2759|Eukaryota,37R71@33090|Viridiplantae,3GFH6@35493|Streptophyta,44GD0@71274|asterids	0.0	Adagio protein 3 OS=Arabidopsis thaliana OX=3702 GN=ADO3 PE=1 SV=1	0	PAS_9 & PAS & PAS_4 & PAS_3 & Kelch_4 & Kelch_3
PB.16.6	ko:K12116	GO:0005575,GO:0005622,GO:0005623,GO:0005634,GO:0005737,GO:0006355,GO:0007623,GO:0008150,GO:0009314,GO:0009416,GO:0009628,GO:0009637,GO:0009889,GO:0009909,GO:0009911,GO:0010468,GO:0010556,GO:0019219,GO:0019222,GO:0031323,GO:0031326,GO:0043226,GO:0043227,GO:0043229,GO:0043231,GO:0044424,GO:0044464,GO:0048511,GO:0048518,GO:0048580,GO:0048582,GO:0048831,GO:0050789,GO:0050793,GO:0050794,GO:0050896,GO:…	PREDICTED: Solanum tuberosum adagio protein 3 (LOC102593553), mRNA	0	hypothetical protein KY289_000041	0	bacterio-opsin activator [Natronomonas pharaonis DSM 2160]	5.14e-21	Kelch repeat-containing proteins	7.64e-31	28PPM@1|root,2QWBU@2759|Eukaryota,37R71@33090|Viridiplantae,3GFH6@35493|Streptophyta,44GD0@71274|asterids	0.0	Adagio protein 3 OS=Arabidopsis thaliana OX=3702 GN=ADO3 PE=1 SV=1	0	PAS_9 & PAS & PAS_4 & PAS_3 & Kelch_4 & Kelch_3
PB.16.7	ko:K12116	GO:0005575,GO:0005622,GO:0005623,GO:0005634,GO:0005737,GO:0006355,GO:0007623,GO:0008150,GO:0009314,GO:0009416,GO:0009628,GO:0009637,GO:0009889,GO:0009909,GO:0009911,GO:0010468,GO:0010556,GO:0019219,GO:0019222,GO:0031323,GO:0031326,GO:0043226,GO:0043227,GO:0043229,GO:0043231,GO:0044424,GO:0044464,GO:0048511,GO:0048518,GO:0048580,GO:0048582,GO:0048831,GO:0050789,GO:0050793,GO:0050794,GO:0050896,GO:…	PREDICTED: Solanum tuberosum adagio protein 3 (LOC102593553), mRNA	0	hypothetical protein H5410_000080	0	diguanylate cyclase/phosphodiesterase with PAS/PAC sensor(s) [Oscillatoria nigro-viridis PCC 7112]	2.29e-23	Kelch repeat-containing proteins	2.47e-31	28PPM@1|root,2QWBU@2759|Eukaryota,37R71@33090|Viridiplantae,3GFH6@35493|Streptophyta,44GD0@71274|asterids	2.12e-150	Adagio protein 3 OS=Arabidopsis thaliana OX=3702 GN=ADO3 PE=1 SV=1	4.21e-104	PAS_9 & PAS & PAS_4 & PAS_3 & Kelch_4 & Kelch_3
PB.16.8	ko:K12116	GO:0005575,GO:0005622,GO:0005623,GO:0005634,GO:0005737,GO:0006355,GO:0007623,GO:0008150,GO:0009314,GO:0009416,GO:0009628,GO:0009637,GO:0009889,GO:0009909,GO:0009911,GO:0010468,GO:0010556,GO:0019219,GO:0019222,GO:0031323,GO:0031326,GO:0043226,GO:0043227,GO:0043229,GO:0043231,GO:0044424,GO:0044464,GO:0048511,GO:0048518,GO:0048580,GO:0048582,GO:0048831,GO:0050789,GO:0050793,GO:0050794,GO:0050896,GO:…	PREDICTED: Solanum tuberosum adagio protein 3 (LOC102593553), mRNA	0	hypothetical protein KY284_003814	0	bacterio-opsin activator [Natronomonas pharaonis DSM 2160]	4.9e-21	Kelch repeat-containing proteins	6.86e-31	28PPM@1|root,2QWBU@2759|Eukaryota,37R71@33090|Viridiplantae,3GFH6@35493|Streptophyta,44GD0@71274|asterids	0.0	Adagio protein 3 OS=Arabidopsis thaliana OX=3702 GN=ADO3 PE=1 SV=1	0	PAS_9 & PAS & PAS_4 & PAS_3 & Kelch_4 & Kelch_3
PB.16.9	ko:K12115,ko:K12117	GO:0005575,GO:0005622,GO:0005623,GO:0005634,GO:0005737,GO:0043226,GO:0043227,GO:0043229,GO:0043231,GO:0044424,GO:0044464	Solanum pinnatisectum cultivar CGN17745 chromosome 1	4.95e-149	hypothetical protein H5410_000080	1.6e-60	hypothetical protein RS03712 [Ralstonia solanacearum GMI1000]	2.01e-10	#N/A	#N/A	COG2202@1|root,2QQR1@2759|Eukaryota,37NPX@33090|Viridiplantae,3G7IE@35493|Streptophyta,3KMP6@4447|Liliopsida	4.19e-12	Adagio protein 3 OS=Arabidopsis thaliana OX=3702 GN=ADO3 PE=1 SV=1	5.47e-17	#N/A
PB.16.10	ko:K12116	GO:0005575,GO:0005622,GO:0005623,GO:0005634,GO:0005737,GO:0006355,GO:0007623,GO:0008150,GO:0009314,GO:0009416,GO:0009628,GO:0009637,GO:0009889,GO:0009909,GO:0009911,GO:0010468,GO:0010556,GO:0019219,GO:0019222,GO:0031323,GO:0031326,GO:0043226,GO:0043227,GO:0043229,GO:0043231,GO:0044424,GO:0044464,GO:0048511,GO:0048518,GO:0048580,GO:0048582,GO:0048831,GO:0050789,GO:0050793,GO:0050794,GO:0050896,GO:…	PREDICTED: Solanum tuberosum adagio protein 3 (LOC102593553), mRNA	0	hypothetical protein KY289_000041	0	bacterio-opsin activator [Natronomonas pharaonis DSM 2160]	5.14e-21	Kelch repeat-containing proteins	7.64e-31	28PPM@1|root,2QWBU@2759|Eukaryota,37R71@33090|Viridiplantae,3GFH6@35493|Streptophyta,44GD0@71274|asterids	0.0	Adagio protein 3 OS=Arabidopsis thaliana OX=3702 GN=ADO3 PE=1 SV=1	0	PAS_9 & PAS & PAS_4 & PAS_3 & Kelch_4 & Kelch_3
PB.16.11	ko:K12116	GO:0005575,GO:0005622,GO:0005623,GO:0005634,GO:0005737,GO:0006355,GO:0007623,GO:0008150,GO:0009314,GO:0009416,GO:0009628,GO:0009637,GO:0009889,GO:0009909,GO:0009911,GO:0010468,GO:0010556,GO:0019219,GO:0019222,GO:0031323,GO:0031326,GO:0043226,GO:0043227,GO:0043229,GO:0043231,GO:0044424,GO:0044464,GO:0048511,GO:0048518,GO:0048580,GO:0048582,GO:0048831,GO:0050789,GO:0050793,GO:0050794,GO:0050896,GO:…	PREDICTED: Solanum tuberosum adagio protein 3 (LOC102593553), mRNA	0	hypothetical protein KY284_003814	0	bacterio-opsin activator [Natronomonas pharaonis DSM 2160]	3.95e-21	Kelch repeat-containing proteins	7.21e-31	28PPM@1|root,2QWBU@2759|Eukaryota,37R71@33090|Viridiplantae,3GFH6@35493|Streptophyta,44GD0@71274|asterids	0.0	Adagio protein 3 OS=Arabidopsis thaliana OX=3702 GN=ADO3 PE=1 SV=1	0	PAS_9 & PAS & PAS_4 & PAS_3 & Kelch_4 & Kelch_3
PB.16.12	ko:K12116	GO:0005575,GO:0005622,GO:0005623,GO:0005634,GO:0005737,GO:0006355,GO:0007623,GO:0008150,GO:0009314,GO:0009416,GO:0009628,GO:0009637,GO:0009889,GO:0009909,GO:0009911,GO:0010468,GO:0010556,GO:0019219,GO:0019222,GO:0031323,GO:0031326,GO:0043226,GO:0043227,GO:0043229,GO:0043231,GO:0044424,GO:0044464,GO:0048511,GO:0048518,GO:0048580,GO:0048582,GO:0048831,GO:0050789,GO:0050793,GO:0050794,GO:0050896,GO:…	PREDICTED: Solanum tuberosum adagio protein 3 (LOC102593553), mRNA	0	hypothetical protein KY284_003814	0	bacterio-opsin activator [Natronomonas pharaonis DSM 2160]	4.84e-16	Kelch repeat-containing proteins	6.57e-31	28PPM@1|root,2QWBU@2759|Eukaryota,37R71@33090|Viridiplantae,3GFH6@35493|Streptophyta,44GD0@71274|asterids	0.0	Adagio protein 3 OS=Arabidopsis thaliana OX=3702 GN=ADO3 PE=1 SV=1	0	PAS_9 & Kelch_4 & Kelch_3
PB.16.13	ko:K12116	GO:0005575,GO:0005622,GO:0005623,GO:0005634,GO:0005737,GO:0006355,GO:0007623,GO:0008150,GO:0009314,GO:0009416,GO:0009628,GO:0009637,GO:0009889,GO:0009909,GO:0009911,GO:0010468,GO:0010556,GO:0019219,GO:0019222,GO:0031323,GO:0031326,GO:0043226,GO:0043227,GO:0043229,GO:0043231,GO:0044424,GO:0044464,GO:0048511,GO:0048518,GO:0048580,GO:0048582,GO:0048831,GO:0050789,GO:0050793,GO:0050794,GO:0050896,GO:…	Solanum pinnatisectum cultivar CGN17745 chromosome 1	0	hypothetical protein H5410_000081	2.31e-180	#N/A	#N/A	Kelch repeat-containing proteins	1.45e-32	28PPM@1|root,2QWBU@2759|Eukaryota,37R71@33090|Viridiplantae,3GFH6@35493|Streptophyta,44GD0@71274|asterids	1.98e-185	Adagio protein 3 OS=Arabidopsis thaliana OX=3702 GN=ADO3 PE=1 SV=1	2.27e-156	Kelch_3 & Kelch_4 & Kelch_2
PB.16.14	ko:K12116	GO:0005575,GO:0005622,GO:0005623,GO:0005634,GO:0005737,GO:0006355,GO:0007623,GO:0008150,GO:0009314,GO:0009416,GO:0009628,GO:0009637,GO:0009889,GO:0009909,GO:0009911,GO:0010468,GO:0010556,GO:0019219,GO:0019222,GO:0031323,GO:0031326,GO:0043226,GO:0043227,GO:0043229,GO:0043231,GO:0044424,GO:0044464,GO:0048511,GO:0048518,GO:0048580,GO:0048582,GO:0048831,GO:0050789,GO:0050793,GO:0050794,GO:0050896,GO:…	Solanum pinnatisectum cultivar CGN17745 chromosome 1	0	hypothetical protein KY284_003814	0	hypothetical protein Desti_3313 [Desulfomonile tiedjei DSM 6799]	5.36e-09	Kelch repeat-containing proteins	2.88e-31	28PPM@1|root,2QWBU@2759|Eukaryota,37R71@33090|Viridiplantae,3GFH6@35493|Streptophyta,44GD0@71274|asterids	1.49e-290	Adagio protein 3 OS=Arabidopsis thaliana OX=3702 GN=ADO3 PE=1 SV=1	0	Kelch_4 & Kelch_3
PB.16.15	ko:K12116	GO:0005575,GO:0005622,GO:0005623,GO:0005634,GO:0005737,GO:0006355,GO:0007623,GO:0008150,GO:0009314,GO:0009416,GO:0009628,GO:0009637,GO:0009889,GO:0009909,GO:0009911,GO:0010468,GO:0010556,GO:0019219,GO:0019222,GO:0031323,GO:0031326,GO:0043226,GO:0043227,GO:0043229,GO:0043231,GO:0044424,GO:0044464,GO:0048511,GO:0048518,GO:0048580,GO:0048582,GO:0048831,GO:0050789,GO:0050793,GO:0050794,GO:0050896,GO:…	Solanum pinnatisectum cultivar CGN17745 chromosome 1	0	hypothetical protein KY284_003814	0	hypothetical protein Desti_3313 [Desulfomonile tiedjei DSM 6799]	5.22e-09	Kelch repeat-containing proteins	2.5e-31	28PPM@1|root,2QWBU@2759|Eukaryota,37R71@33090|Viridiplantae,3GFH6@35493|Streptophyta,44GD0@71274|asterids	7e-284	Adagio protein 3 OS=Arabidopsis thaliana OX=3702 GN=ADO3 PE=1 SV=1	0	Kelch_4 & Kelch_3
PB.16.16	ko:K12116	GO:0005575,GO:0005622,GO:0005623,GO:0005634,GO:0005737,GO:0006355,GO:0007623,GO:0008150,GO:0009314,GO:0009416,GO:0009628,GO:0009637,GO:0009889,GO:0009909,GO:0009911,GO:0010468,GO:0010556,GO:0019219,GO:0019222,GO:0031323,GO:0031326,GO:0043226,GO:0043227,GO:0043229,GO:0043231,GO:0044424,GO:0044464,GO:0048511,GO:0048518,GO:0048580,GO:0048582,GO:0048831,GO:0050789,GO:0050793,GO:0050794,GO:0050896,GO:…	Solanum pinnatisectum cultivar CGN17745 chromosome 1	0	hypothetical protein KY285_003643	0	hypothetical protein Desti_3313 [Desulfomonile tiedjei DSM 6799]	1.09e-09	Kelch repeat-containing proteins	1.81e-31	28PPM@1|root,2QWBU@2759|Eukaryota,37R71@33090|Viridiplantae,3GFH6@35493|Streptophyta,44GD0@71274|asterids	4.04e-269	Adagio protein 3 OS=Arabidopsis thaliana OX=3702 GN=ADO3 PE=1 SV=1	0	Kelch_4 & Kelch_3
PB.17.1	-	GO:0003674,GO:0003712,GO:0003713,GO:0003824,GO:0006325,GO:0006355,GO:0006464,GO:0006479,GO:0006807,GO:0006996,GO:0008150,GO:0008152,GO:0008168,GO:0008170,GO:0008213,GO:0008276,GO:0008757,GO:0009889,GO:0009891,GO:0009893,GO:0009987,GO:0010452,GO:0010468,GO:0010556,GO:0010557,GO:0010604,GO:0010628,GO:0016043,GO:0016278,GO:0016279,GO:0016569,GO:0016570,GO:0016571,GO:0016740,GO:0016741,GO:0018022,GO:…	Solanum tuberosum cultivar Solyntus chromosome 1	8.5e-142	hypothetical protein H5410_000107	1.1e-62	#N/A	#N/A	#N/A	#N/A	KOG1337@1|root,KOG1337@2759|Eukaryota,37MUQ@33090|Viridiplantae,3GDYY@35493|Streptophyta,44DJQ@71274|asterids	1.2e-59	Actin-histidine N-methyltransferase OS=Canis lupus familiaris OX=9615 GN=SETD3 PE=3 SV=1	1.71e-18	SET & Rubis-subs-bind
PB.17.2	-	GO:0003674,GO:0003712,GO:0003713,GO:0003824,GO:0006325,GO:0006355,GO:0006464,GO:0006479,GO:0006807,GO:0006996,GO:0008150,GO:0008152,GO:0008168,GO:0008170,GO:0008213,GO:0008276,GO:0008757,GO:0009889,GO:0009891,GO:0009893,GO:0009987,GO:0010452,GO:0010468,GO:0010556,GO:0010557,GO:0010604,GO:0010628,GO:0016043,GO:0016278,GO:0016279,GO:0016569,GO:0016570,GO:0016571,GO:0016740,GO:0016741,GO:0018022,GO:…	PREDICTED: Solanum pennellii histone-lysine N-methyltransferase setd3 (LOC107012975), mRNA	0	hypothetical protein EJD97_007728	1.46e-144	#N/A	#N/A	#N/A	#N/A	KOG1337@1|root,KOG1337@2759|Eukaryota,37MUQ@33090|Viridiplantae,3GDYY@35493|Streptophyta,44DJQ@71274|asterids	2.49e-136	Actin-histidine N-methyltransferase OS=Canis lupus familiaris OX=9615 GN=SETD3 PE=3 SV=1	4.2e-12	Rubis-subs-bind
PB.17.3	-	GO:0003674,GO:0003712,GO:0003713,GO:0003824,GO:0006325,GO:0006355,GO:0006464,GO:0006479,GO:0006807,GO:0006996,GO:0008150,GO:0008152,GO:0008168,GO:0008170,GO:0008213,GO:0008276,GO:0008757,GO:0009889,GO:0009891,GO:0009893,GO:0009987,GO:0010452,GO:0010468,GO:0010556,GO:0010557,GO:0010604,GO:0010628,GO:0016043,GO:0016278,GO:0016279,GO:0016569,GO:0016570,GO:0016571,GO:0016740,GO:0016741,GO:0018022,GO:…	PREDICTED: Solanum pennellii histone-lysine N-methyltransferase setd3 (LOC107012975), mRNA	0	histone-lysine N-methyltransferase setd3	0	#N/A	#N/A	#N/A	#N/A	KOG1337@1|root,KOG1337@2759|Eukaryota,37MUQ@33090|Viridiplantae,3GDYY@35493|Streptophyta,44DJQ@71274|asterids	0.0	Actin-histidine N-methyltransferase OS=Callithrix jacchus OX=9483 GN=SETD3 PE=3 SV=2	6.92e-23	SET & Rubis-subs-bind
PB.17.4	-	GO:0003674,GO:0003712,GO:0003713,GO:0003824,GO:0006325,GO:0006355,GO:0006464,GO:0006479,GO:0006807,GO:0006996,GO:0008150,GO:0008152,GO:0008168,GO:0008170,GO:0008213,GO:0008276,GO:0008757,GO:0009889,GO:0009891,GO:0009893,GO:0009987,GO:0010452,GO:0010468,GO:0010556,GO:0010557,GO:0010604,GO:0010628,GO:0016043,GO:0016278,GO:0016279,GO:0016569,GO:0016570,GO:0016571,GO:0016740,GO:0016741,GO:0018022,GO:…	PREDICTED: Solanum pennellii histone-lysine N-methyltransferase setd3 (LOC107012975), mRNA	0	histone-lysine N-methyltransferase setd3	0	#N/A	#N/A	#N/A	#N/A	KOG1337@1|root,KOG1337@2759|Eukaryota,37MUQ@33090|Viridiplantae,3GDYY@35493|Streptophyta,44DJQ@71274|asterids	0.0	Actin-histidine N-methyltransferase OS=Callithrix jacchus OX=9483 GN=SETD3 PE=3 SV=2	6.92e-23	SET & Rubis-subs-bind
PB.18.1	ko:K13464	GO:0001101,GO:0003674,GO:0003712,GO:0003714,GO:0005488,GO:0005515,GO:0005575,GO:0005622,GO:0005623,GO:0005634,GO:0006950,GO:0007154,GO:0007165,GO:0008150,GO:0009611,GO:0009719,GO:0009725,GO:0009753,GO:0009755,GO:0009867,GO:0009889,GO:0009890,GO:0009892,GO:0009966,GO:0009987,GO:0010033,GO:0010556,GO:0010558,GO:0010605,GO:0010646,GO:0019219,GO:0019222,GO:0023051,GO:0023052,GO:0031323,GO:0031324,GO:…	PREDICTED: Solanum tuberosum protein TIFY 6B-like (LOC102586069), transcript variant X1, mRNA	0	hypothetical protein KY284_003818	0	#N/A	#N/A	#N/A	#N/A	2CMHV@1|root,2QQDB@2759|Eukaryota,37SDR@33090|Viridiplantae,3GGY0@35493|Streptophyta,44JW9@71274|asterids	1.67e-227	Protein TIFY 6B OS=Arabidopsis thaliana OX=3702 GN=TIFY6B PE=1 SV=1	9.65e-42	tify & Jas_motif
PB.18.2	ko:K13464	GO:0001101,GO:0003674,GO:0003712,GO:0003714,GO:0005488,GO:0005515,GO:0005575,GO:0005622,GO:0005623,GO:0005634,GO:0006950,GO:0007154,GO:0007165,GO:0008150,GO:0009611,GO:0009719,GO:0009725,GO:0009753,GO:0009755,GO:0009867,GO:0009889,GO:0009890,GO:0009892,GO:0009966,GO:0009987,GO:0010033,GO:0010556,GO:0010558,GO:0010605,GO:0010646,GO:0019219,GO:0019222,GO:0023051,GO:0023052,GO:0031323,GO:0031324,GO:…	PREDICTED: Solanum tuberosum protein TIFY 6B-like (LOC102586069), transcript variant X1, mRNA	0	hypothetical protein KY284_003818	0	#N/A	#N/A	#N/A	#N/A	2CMHV@1|root,2QQDB@2759|Eukaryota,37SDR@33090|Viridiplantae,3GGY0@35493|Streptophyta,44JW9@71274|asterids	1.01e-228	Protein TIFY 6B OS=Arabidopsis thaliana OX=3702 GN=TIFY6B PE=1 SV=1	8.33e-42	tify & Jas_motif
PB.18.3	ko:K13464	GO:0001101,GO:0003674,GO:0003712,GO:0003714,GO:0005488,GO:0005515,GO:0005575,GO:0005622,GO:0005623,GO:0005634,GO:0006950,GO:0007154,GO:0007165,GO:0008150,GO:0009611,GO:0009719,GO:0009725,GO:0009753,GO:0009755,GO:0009867,GO:0009889,GO:0009890,GO:0009892,GO:0009966,GO:0009987,GO:0010033,GO:0010556,GO:0010558,GO:0010605,GO:0010646,GO:0019219,GO:0019222,GO:0023051,GO:0023052,GO:0031323,GO:0031324,GO:…	PREDICTED: Solanum tuberosum protein TIFY 6B-like (LOC102586069), transcript variant X1, mRNA	0	hypothetical protein KY284_003818	0	#N/A	#N/A	#N/A	#N/A	2CMHV@1|root,2QQDB@2759|Eukaryota,37SDR@33090|Viridiplantae,3GGY0@35493|Streptophyta,44JW9@71274|asterids	1.01e-228	Protein TIFY 6B OS=Arabidopsis thaliana OX=3702 GN=TIFY6B PE=1 SV=1	8.33e-42	tify & Jas_motif
PB.18.4	#N/A	#N/A	#N/A	#N/A	#N/A	#N/A	#N/A	#N/A	#N/A	#N/A	#N/A	#N/A	#N/A	#N/A	#N/A
PB.19.1	-	GO:0005575,GO:0005623,GO:0005886,GO:0016020,GO:0044464,GO:0071944	PREDICTED: Solanum tuberosum ankyrin repeat-containing protein At2g01680 (LOC102592203), transcript variant X1, mRNA	0	hypothetical protein H5410_000087	0	ankyrin repeat-containing protein 10_02 [Orientia tsutsugamushi str. Ikeda]	5.7e-21	FOG: Ankyrin repeat	2.44e-91	COG0666@1|root,KOG0504@2759|Eukaryota,37S5Q@33090|Viridiplantae,3GDQU@35493|Streptophyta,44FAU@71274|asterids	6.07e-146	Ankyrin repeat-containing protein At2g01680 OS=Arabidopsis thaliana OX=3702 GN=At2g01680 PE=2 SV=1	0	Ank_4 & Ank_2 & PGG
PB.20.1	-	-	PREDICTED: Solanum tuberosum UPF0496 protein At3g19330-like (LOC102588164), transcript variant X1, mRNA	6.25e-158	hypothetical protein H5410_000122	0	#N/A	#N/A	0	1.19e-73	28NQD@1|root,2QUJ9@2759|Eukaryota,37HNA@33090|Viridiplantae,3GER9@35493|Streptophyta,44FMK@71274|asterids	5.84e-254	UPF0496 protein At3g19330 OS=Arabidopsis thaliana OX=3702 GN=At3g19330 PE=2 SV=2	2.69e-77	DUF677
PB.20.2	-	-	PREDICTED: Solanum tuberosum UPF0496 protein At3g19330-like (LOC102588164), transcript variant X1, mRNA	6.13e-158	hypothetical protein H5410_000122	0	#N/A	#N/A	0	1.19e-73	28NQD@1|root,2QUJ9@2759|Eukaryota,37HNA@33090|Viridiplantae,3GER9@35493|Streptophyta,44FMK@71274|asterids	5.84e-254	UPF0496 protein At3g19330 OS=Arabidopsis thaliana OX=3702 GN=At3g19330 PE=2 SV=2	2.69e-77	DUF677
PB.20.3	-	-	PREDICTED: Solanum pennellii UPF0496 protein At3g19330-like (LOC107008453), transcript variant X2, mRNA	0	hypothetical protein H5410_000122	0	#N/A	#N/A	0	1.19e-73	28NQD@1|root,2QUJ9@2759|Eukaryota,37HNA@33090|Viridiplantae,3GER9@35493|Streptophyta,44FMK@71274|asterids	5.84e-254	UPF0496 protein At3g19330 OS=Arabidopsis thaliana OX=3702 GN=At3g19330 PE=2 SV=2	2.69e-77	DUF677
PB.21.1	ko:K14664	-	PREDICTED: Solanum tuberosum IAA-amino acid hydrolase ILR1-like 3 (LOC102588705), mRNA	0	hypothetical protein KY289_000058	0	IAA-amino acid hydrolase [Pyrococcus furiosus DSM 3638]	6.53e-110	#N/A	#N/A	COG1473@1|root,2QQEM@2759|Eukaryota,37JVC@33090|Viridiplantae,3GAU7@35493|Streptophyta,44N1R@71274|asterids	9.73e-266	IAA-amino acid hydrolase ILR1-like 3 OS=Oryza sativa subsp. japonica OX=39947 GN=ILL3 PE=2 SV=1	8.73e-177	Peptidase_M20 & M20_dimer
PB.22.1	-	-	PREDICTED: Solanum pennellii uncharacterized LOC107031957 (LOC107031957), transcript variant X1, mRNA	0	uncharacterized protein LOC107031957 isoform X1	1.44e-83	#N/A	#N/A	#N/A	#N/A	2CXPS@1|root,2S4M3@2759|Eukaryota,37WCM@33090|Viridiplantae,3GKJX@35493|Streptophyta,44KXU@71274|asterids	2.83e-84	#N/A	#N/A	#N/A
PB.23.1	-	GO:0005575,GO:0005622,GO:0005623,GO:0005737,GO:0006091,GO:0006807,GO:0006950,GO:0008150,GO:0008152,GO:0009314,GO:0009416,GO:0009507,GO:0009509,GO:0009526,GO:0009532,GO:0009534,GO:0009535,GO:0009536,GO:0009570,GO:0009575,GO:0009579,GO:0009611,GO:0009628,GO:0009642,GO:0009644,GO:0009765,GO:0009941,GO:0009987,GO:0010206,GO:0010207,GO:0015979,GO:0016020,GO:0016043,GO:0019538,GO:0019684,GO:0019898,GO:…	PREDICTED: Solanum tuberosum uncharacterized LOC102590017 (LOC102590017), mRNA	0	PREDICTED: uncharacterized protein LOC102590017	0	hypothetical protein Dole_2419 [Desulfococcus oleovorans Hxd3]	1.66e-09	0	7.57e-08	2CBEU@1|root,2QQQU@2759|Eukaryota,37SIM@33090|Viridiplantae,3GB6Q@35493|Streptophyta,44DWB@71274|asterids	5.87e-210	Protein MET1, chloroplastic OS=Arabidopsis thaliana OX=3702 GN=MET1 PE=1 SV=1	1.72e-149	#N/A
PB.23.2	-	GO:0005575,GO:0005622,GO:0005623,GO:0005737,GO:0006091,GO:0006807,GO:0006950,GO:0008150,GO:0008152,GO:0009314,GO:0009416,GO:0009507,GO:0009509,GO:0009526,GO:0009532,GO:0009534,GO:0009535,GO:0009536,GO:0009570,GO:0009575,GO:0009579,GO:0009611,GO:0009628,GO:0009642,GO:0009644,GO:0009765,GO:0009941,GO:0009987,GO:0010206,GO:0010207,GO:0015979,GO:0016020,GO:0016043,GO:0019538,GO:0019684,GO:0019898,GO:…	PREDICTED: Solanum tuberosum uncharacterized LOC102590017 (LOC102590017), mRNA	0	PREDICTED: uncharacterized protein LOC102590017	0	hypothetical protein Dole_2419 [Desulfococcus oleovorans Hxd3]	3.98e-10	0	7.57e-08	2CBEU@1|root,2QQQU@2759|Eukaryota,37SIM@33090|Viridiplantae,3GB6Q@35493|Streptophyta,44DWB@71274|asterids	1.01e-210	Protein MET1, chloroplastic OS=Arabidopsis thaliana OX=3702 GN=MET1 PE=1 SV=1	2.59e-150	#N/A
PB.23.3	-	GO:0005575,GO:0005622,GO:0005623,GO:0005737,GO:0006091,GO:0006807,GO:0006950,GO:0008150,GO:0008152,GO:0009314,GO:0009416,GO:0009507,GO:0009509,GO:0009526,GO:0009532,GO:0009534,GO:0009535,GO:0009536,GO:0009570,GO:0009575,GO:0009579,GO:0009611,GO:0009628,GO:0009642,GO:0009644,GO:0009765,GO:0009941,GO:0009987,GO:0010206,GO:0010207,GO:0015979,GO:0016020,GO:0016043,GO:0019538,GO:0019684,GO:0019898,GO:…	PREDICTED: Solanum tuberosum uncharacterized LOC102590017 (LOC102590017), mRNA	0	PREDICTED: uncharacterized protein LOC102590017	1.3e-112	#N/A	#N/A	0	6.2e-09	2CBEU@1|root,2QQQU@2759|Eukaryota,37SIM@33090|Viridiplantae,3GB6Q@35493|Streptophyta,44DWB@71274|asterids	2.08e-94	Protein MET1, chloroplastic OS=Arabidopsis thaliana OX=3702 GN=MET1 PE=1 SV=1	4.27e-49	#N/A
PB.23.4	-	GO:0005575,GO:0005622,GO:0005623,GO:0005737,GO:0006091,GO:0006807,GO:0006950,GO:0008150,GO:0008152,GO:0009314,GO:0009416,GO:0009507,GO:0009509,GO:0009526,GO:0009532,GO:0009534,GO:0009535,GO:0009536,GO:0009570,GO:0009575,GO:0009579,GO:0009611,GO:0009628,GO:0009642,GO:0009644,GO:0009765,GO:0009941,GO:0009987,GO:0010206,GO:0010207,GO:0015979,GO:0016020,GO:0016043,GO:0019538,GO:0019684,GO:0019898,GO:…	PREDICTED: Solanum tuberosum uncharacterized LOC102590017 (LOC102590017), mRNA	0	hypothetical protein KY284_000064	5.05e-153	hypothetical protein Dole_2419 [Desulfococcus oleovorans Hxd3]	3.13e-10	#N/A	#N/A	2CBEU@1|root,2QQQU@2759|Eukaryota,37SIM@33090|Viridiplantae,3GB6Q@35493|Streptophyta,44DWB@71274|asterids	1.4e-142	Protein MET1, chloroplastic OS=Arabidopsis thaliana OX=3702 GN=MET1 PE=1 SV=1	2.39e-128	#N/A
PB.23.5	-	GO:0005575,GO:0005622,GO:0005623,GO:0005737,GO:0006091,GO:0006807,GO:0006950,GO:0008150,GO:0008152,GO:0009314,GO:0009416,GO:0009507,GO:0009509,GO:0009526,GO:0009532,GO:0009534,GO:0009535,GO:0009536,GO:0009570,GO:0009575,GO:0009579,GO:0009611,GO:0009628,GO:0009642,GO:0009644,GO:0009765,GO:0009941,GO:0009987,GO:0010206,GO:0010207,GO:0015979,GO:0016020,GO:0016043,GO:0019538,GO:0019684,GO:0019898,GO:…	PREDICTED: Solanum tuberosum uncharacterized LOC102590017 (LOC102590017), mRNA	0	PREDICTED: uncharacterized protein LOC102590017	0	hypothetical protein Dole_2419 [Desulfococcus oleovorans Hxd3]	3.63e-10	0	8.85e-08	2CBEU@1|root,2QQQU@2759|Eukaryota,37SIM@33090|Viridiplantae,3GB6Q@35493|Streptophyta,44DWB@71274|asterids	8.48e-200	Protein MET1, chloroplastic OS=Arabidopsis thaliana OX=3702 GN=MET1 PE=1 SV=1	1.41e-150	#N/A
PB.23.6	-	GO:0005575,GO:0005622,GO:0005623,GO:0005737,GO:0006091,GO:0006807,GO:0006950,GO:0008150,GO:0008152,GO:0009314,GO:0009416,GO:0009507,GO:0009509,GO:0009526,GO:0009532,GO:0009534,GO:0009535,GO:0009536,GO:0009570,GO:0009575,GO:0009579,GO:0009611,GO:0009628,GO:0009642,GO:0009644,GO:0009765,GO:0009941,GO:0009987,GO:0010206,GO:0010207,GO:0015979,GO:0016020,GO:0016043,GO:0019538,GO:0019684,GO:0019898,GO:…	PREDICTED: Solanum tuberosum uncharacterized LOC102590017 (LOC102590017), mRNA	0	hypothetical protein KY284_000064	3.48e-127	hypothetical protein Dole_2419 [Desulfococcus oleovorans Hxd3]	7.51e-11	#N/A	#N/A	2CBEU@1|root,2QQQU@2759|Eukaryota,37SIM@33090|Viridiplantae,3GB6Q@35493|Streptophyta,44DWB@71274|asterids	4.83e-118	Protein MET1, chloroplastic OS=Arabidopsis thaliana OX=3702 GN=MET1 PE=1 SV=1	3.4e-103	#N/A
PB.23.7	-	GO:0005575,GO:0005622,GO:0005623,GO:0005737,GO:0006091,GO:0006807,GO:0006950,GO:0008150,GO:0008152,GO:0009314,GO:0009416,GO:0009507,GO:0009509,GO:0009526,GO:0009532,GO:0009534,GO:0009535,GO:0009536,GO:0009570,GO:0009575,GO:0009579,GO:0009611,GO:0009628,GO:0009642,GO:0009644,GO:0009765,GO:0009941,GO:0009987,GO:0010206,GO:0010207,GO:0015979,GO:0016020,GO:0016043,GO:0019538,GO:0019684,GO:0019898,GO:…	PREDICTED: Solanum tuberosum uncharacterized LOC102590017 (LOC102590017), mRNA	0	hypothetical protein KY284_000064	2.87e-130	hypothetical protein Dole_2419 [Desulfococcus oleovorans Hxd3]	1.68e-11	#N/A	#N/A	2CBEU@1|root,2QQQU@2759|Eukaryota,37SIM@33090|Viridiplantae,3GB6Q@35493|Streptophyta,44DWB@71274|asterids	7.05e-121	Protein MET1, chloroplastic OS=Arabidopsis thaliana OX=3702 GN=MET1 PE=1 SV=1	1.75e-106	#N/A
PB.23.8	-	GO:0005575,GO:0005622,GO:0005623,GO:0005737,GO:0006091,GO:0006807,GO:0006950,GO:0008150,GO:0008152,GO:0009314,GO:0009416,GO:0009507,GO:0009509,GO:0009526,GO:0009532,GO:0009534,GO:0009535,GO:0009536,GO:0009570,GO:0009575,GO:0009579,GO:0009611,GO:0009628,GO:0009642,GO:0009644,GO:0009765,GO:0009941,GO:0009987,GO:0010206,GO:0010207,GO:0015979,GO:0016020,GO:0016043,GO:0019538,GO:0019684,GO:0019898,GO:…	PREDICTED: Solanum tuberosum uncharacterized LOC102590017 (LOC102590017), mRNA	0	hypothetical protein KY284_000064	1.85e-120	hypothetical protein Dole_2419 [Desulfococcus oleovorans Hxd3]	6.11e-11	#N/A	#N/A	2CBEU@1|root,2QQQU@2759|Eukaryota,37SIM@33090|Viridiplantae,3GB6Q@35493|Streptophyta,44DWB@71274|asterids	8.48e-112	Protein MET1, chloroplastic OS=Arabidopsis thaliana OX=3702 GN=MET1 PE=1 SV=1	2.75e-96	#N/A
PB.24.1	-	-	PREDICTED: Solanum tuberosum uncharacterized LOC102591027 (LOC102591027), mRNA	0	PREDICTED: uncharacterized protein LOC102591027	0	#N/A	#N/A	0	7.3e-162	28NR1@1|root,2QVB2@2759|Eukaryota,37HM8@33090|Viridiplantae,3GA7F@35493|Streptophyta,44QZY@71274|asterids	0.0	#N/A	#N/A	Neprosin_AP & Neprosin
PB.24.2	-	-	PREDICTED: Solanum tuberosum uncharacterized LOC102591027 (LOC102591027), mRNA	0	hypothetical protein KY289_000065	0	#N/A	#N/A	0	4.93e-156	28NR1@1|root,2QVB2@2759|Eukaryota,37HM8@33090|Viridiplantae,3GA7F@35493|Streptophyta,44QZY@71274|asterids	1.9e-280	#N/A	#N/A	Neprosin_AP & Neprosin
PB.24.3	-	-	PREDICTED: Solanum tuberosum uncharacterized LOC102591027 (LOC102591027), mRNA	0	PREDICTED: uncharacterized protein LOC102591027	0	#N/A	#N/A	0	7.3e-162	28NR1@1|root,2QVB2@2759|Eukaryota,37HM8@33090|Viridiplantae,3GA7F@35493|Streptophyta,44QZY@71274|asterids	0.0	#N/A	#N/A	Neprosin_AP & Neprosin
PB.24.4	-	-	PREDICTED: Solanum tuberosum uncharacterized LOC102591027 (LOC102591027), mRNA	0	hypothetical protein KY289_000065	0	#N/A	#N/A	0	4.93e-156	28NR1@1|root,2QVB2@2759|Eukaryota,37HM8@33090|Viridiplantae,3GA7F@35493|Streptophyta,44QZY@71274|asterids	1.9e-280	#N/A	#N/A	Neprosin_AP & Neprosin
PB.24.5	-	-	PREDICTED: Solanum tuberosum uncharacterized LOC102591027 (LOC102591027), mRNA	0	PREDICTED: uncharacterized protein LOC102591027	5.33e-171	#N/A	#N/A	0	1.72e-58	28NR1@1|root,2QVB2@2759|Eukaryota,37HM8@33090|Viridiplantae,3GA7F@35493|Streptophyta,44QZY@71274|asterids	6.46e-168	#N/A	#N/A	Neprosin_AP & Neprosin
PB.24.6	-	-	PREDICTED: Solanum tuberosum uncharacterized LOC102591027 (LOC102591027), mRNA	0	PREDICTED: uncharacterized protein LOC102591027	0	#N/A	#N/A	0	7.3e-162	28NR1@1|root,2QVB2@2759|Eukaryota,37HM8@33090|Viridiplantae,3GA7F@35493|Streptophyta,44QZY@71274|asterids	0.0	#N/A	#N/A	Neprosin_AP & Neprosin
PB.24.7	-	-	PREDICTED: Solanum tuberosum uncharacterized LOC102591027 (LOC102591027), mRNA	0	PREDICTED: uncharacterized protein LOC102591027	0	#N/A	#N/A	0	7.3e-162	28NR1@1|root,2QVB2@2759|Eukaryota,37HM8@33090|Viridiplantae,3GA7F@35493|Streptophyta,44QZY@71274|asterids	0.0	#N/A	#N/A	Neprosin_AP & Neprosin
PB.24.8	-	-	PREDICTED: Solanum tuberosum uncharacterized LOC102591027 (LOC102591027), mRNA	0	PREDICTED: uncharacterized protein LOC102591027	0	#N/A	#N/A	0	7.3e-162	28NR1@1|root,2QVB2@2759|Eukaryota,37HM8@33090|Viridiplantae,3GA7F@35493|Streptophyta,44QZY@71274|asterids	0.0	#N/A	#N/A	Neprosin_AP & Neprosin
PB.24.9	-	-	PREDICTED: Solanum tuberosum uncharacterized LOC102591027 (LOC102591027), mRNA	0	PREDICTED: uncharacterized protein LOC102591027	0	#N/A	#N/A	0	7.3e-162	28NR1@1|root,2QVB2@2759|Eukaryota,37HM8@33090|Viridiplantae,3GA7F@35493|Streptophyta,44QZY@71274|asterids	0.0	#N/A	#N/A	Neprosin_AP & Neprosin
PB.24.10	-	-	Solanum tuberosum cultivar Solyntus chromosome 1	3.7e-180	uncharacterized protein LOC101253614	1.11e-79	#N/A	#N/A	0	4.73e-44	28NR1@1|root,2QVB2@2759|Eukaryota,37HM8@33090|Viridiplantae,3GA7F@35493|Streptophyta,44QZY@71274|asterids	1.25e-81	#N/A	#N/A	Neprosin & Neprosin_AP
PB.24.11	-	-	PREDICTED: Solanum tuberosum uncharacterized LOC102591027 (LOC102591027), mRNA	0	PREDICTED: uncharacterized protein LOC102591027	0	#N/A	#N/A	0	7.3e-162	28NR1@1|root,2QVB2@2759|Eukaryota,37HM8@33090|Viridiplantae,3GA7F@35493|Streptophyta,44QZY@71274|asterids	0.0	#N/A	#N/A	Neprosin_AP & Neprosin
PB.24.12	-	-	PREDICTED: Solanum tuberosum uncharacterized LOC102591027 (LOC102591027), mRNA	0	uncharacterized protein LOC101253614	2.33e-135	#N/A	#N/A	0	2.17e-86	28NR1@1|root,2QVB2@2759|Eukaryota,37HM8@33090|Viridiplantae,3GA7F@35493|Streptophyta,44QZY@71274|asterids	2.54e-137	#N/A	#N/A	Neprosin
PB.25.1	ko:K04567	GO:0000003,GO:0003006,GO:0005575,GO:0005622,GO:0005623,GO:0005737,GO:0005739,GO:0007275,GO:0008150,GO:0009507,GO:0009536,GO:0009791,GO:0009908,GO:0022414,GO:0032501,GO:0032502,GO:0035670,GO:0043226,GO:0043227,GO:0043229,GO:0043231,GO:0044424,GO:0044444,GO:0044464,GO:0048367,GO:0048437,GO:0048438,GO:0048440,GO:0048467,GO:0048481,GO:0048608,GO:0048731,GO:0048827,GO:0048856,GO:0061458,GO:0090567,GO:…	PREDICTED: Solanum tuberosum lysine--tRNA ligase, chloroplastic/mitochondrial (LOC102590674), mRNA	0	hypothetical protein H5410_000139	9.51e-176	lysyl-tRNA synthetase [Thermosynechococcus elongatus BP-1]	4.1e-85	Lysyl-tRNA synthetase (class II)	5.6e-17	COG1190@1|root,KOG1885@2759|Eukaryota,37Q3H@33090|Viridiplantae,3GDRK@35493|Streptophyta,44EDU@71274|asterids	5.07e-158	Lysine--tRNA ligase, chloroplastic/mitochondrial OS=Arabidopsis thaliana OX=3702 GN=OVA5 PE=2 SV=1	9.63e-129	tRNA-synt_2
PB.25.2	ko:K04567	GO:0000003,GO:0003006,GO:0005575,GO:0005622,GO:0005623,GO:0005737,GO:0005739,GO:0007275,GO:0008150,GO:0009507,GO:0009536,GO:0009791,GO:0009908,GO:0022414,GO:0032501,GO:0032502,GO:0035670,GO:0043226,GO:0043227,GO:0043229,GO:0043231,GO:0044424,GO:0044444,GO:0044464,GO:0048367,GO:0048437,GO:0048438,GO:0048440,GO:0048467,GO:0048481,GO:0048608,GO:0048731,GO:0048827,GO:0048856,GO:0061458,GO:0090567,GO:…	PREDICTED: Solanum tuberosum lysine--tRNA ligase, chloroplastic/mitochondrial (LOC102590674), mRNA	0	PREDICTED: lysine--tRNA ligase, chloroplastic/mitochondrial	0	lysyl-tRNA synthetase [Thermosynechococcus elongatus BP-1]	0	Lysyl-tRNA synthetase (class II)	4.23e-54	COG1190@1|root,KOG1885@2759|Eukaryota,37Q3H@33090|Viridiplantae,3GDRK@35493|Streptophyta,44EDU@71274|asterids	0.0	Lysine--tRNA ligase, chloroplastic/mitochondrial OS=Arabidopsis thaliana OX=3702 GN=OVA5 PE=2 SV=1	0	tRNA_anti-codon & tRNA-synt_2
PB.25.3	ko:K04567	GO:0000003,GO:0003006,GO:0005575,GO:0005622,GO:0005623,GO:0005737,GO:0005739,GO:0007275,GO:0008150,GO:0009507,GO:0009536,GO:0009791,GO:0009908,GO:0022414,GO:0032501,GO:0032502,GO:0035670,GO:0043226,GO:0043227,GO:0043229,GO:0043231,GO:0044424,GO:0044444,GO:0044464,GO:0048367,GO:0048437,GO:0048438,GO:0048440,GO:0048467,GO:0048481,GO:0048608,GO:0048731,GO:0048827,GO:0048856,GO:0061458,GO:0090567,GO:…	PREDICTED: Solanum tuberosum lysine--tRNA ligase, chloroplastic/mitochondrial (LOC102590674), mRNA	0	PREDICTED: lysine--tRNA ligase, chloroplastic/mitochondrial	0	lysyl-tRNA synthetase [Thermosynechococcus elongatus BP-1]	0	Lysyl-tRNA synthetase (class II)	4.23e-54	COG1190@1|root,KOG1885@2759|Eukaryota,37Q3H@33090|Viridiplantae,3GDRK@35493|Streptophyta,44EDU@71274|asterids	0.0	Lysine--tRNA ligase, chloroplastic/mitochondrial OS=Arabidopsis thaliana OX=3702 GN=OVA5 PE=2 SV=1	0	tRNA_anti-codon & tRNA-synt_2
PB.25.4	ko:K04567	GO:0000003,GO:0003006,GO:0005575,GO:0005622,GO:0005623,GO:0005737,GO:0005739,GO:0007275,GO:0008150,GO:0009507,GO:0009536,GO:0009791,GO:0009908,GO:0022414,GO:0032501,GO:0032502,GO:0035670,GO:0043226,GO:0043227,GO:0043229,GO:0043231,GO:0044424,GO:0044444,GO:0044464,GO:0048367,GO:0048437,GO:0048438,GO:0048440,GO:0048467,GO:0048481,GO:0048608,GO:0048731,GO:0048827,GO:0048856,GO:0061458,GO:0090567,GO:…	PREDICTED: Solanum tuberosum lysine--tRNA ligase, chloroplastic/mitochondrial (LOC102590674), mRNA	0	PREDICTED: lysine--tRNA ligase, chloroplastic/mitochondrial	0	lysyl-tRNA synthetase [Thermosynechococcus elongatus BP-1]	0	Lysyl-tRNA synthetase (class II)	4.23e-54	COG1190@1|root,KOG1885@2759|Eukaryota,37Q3H@33090|Viridiplantae,3GDRK@35493|Streptophyta,44EDU@71274|asterids	0.0	Lysine--tRNA ligase, chloroplastic/mitochondrial OS=Arabidopsis thaliana OX=3702 GN=OVA5 PE=2 SV=1	0	tRNA_anti-codon & tRNA-synt_2
PB.25.5	ko:K04567	GO:0000003,GO:0003006,GO:0005575,GO:0005622,GO:0005623,GO:0005737,GO:0005739,GO:0007275,GO:0008150,GO:0009507,GO:0009536,GO:0009791,GO:0009908,GO:0022414,GO:0032501,GO:0032502,GO:0035670,GO:0043226,GO:0043227,GO:0043229,GO:0043231,GO:0044424,GO:0044444,GO:0044464,GO:0048367,GO:0048437,GO:0048438,GO:0048440,GO:0048467,GO:0048481,GO:0048608,GO:0048731,GO:0048827,GO:0048856,GO:0061458,GO:0090567,GO:…	PREDICTED: Solanum tuberosum lysine--tRNA ligase, chloroplastic/mitochondrial (LOC102590674), mRNA	0	PREDICTED: lysine--tRNA ligase, chloroplastic/mitochondrial	0	lysyl-tRNA synthetase [Thermosynechococcus elongatus BP-1]	0	Lysyl-tRNA synthetase (class II)	4.23e-54	COG1190@1|root,KOG1885@2759|Eukaryota,37Q3H@33090|Viridiplantae,3GDRK@35493|Streptophyta,44EDU@71274|asterids	0.0	Lysine--tRNA ligase, chloroplastic/mitochondrial OS=Arabidopsis thaliana OX=3702 GN=OVA5 PE=2 SV=1	0	tRNA_anti-codon & tRNA-synt_2
PB.25.6	ko:K04567	GO:0000003,GO:0003006,GO:0005575,GO:0005622,GO:0005623,GO:0005737,GO:0005739,GO:0007275,GO:0008150,GO:0009507,GO:0009536,GO:0009791,GO:0009908,GO:0022414,GO:0032501,GO:0032502,GO:0035670,GO:0043226,GO:0043227,GO:0043229,GO:0043231,GO:0044424,GO:0044444,GO:0044464,GO:0048367,GO:0048437,GO:0048438,GO:0048440,GO:0048467,GO:0048481,GO:0048608,GO:0048731,GO:0048827,GO:0048856,GO:0061458,GO:0090567,GO:…	PREDICTED: Solanum tuberosum lysine--tRNA ligase, chloroplastic/mitochondrial (LOC102590674), mRNA	0	PREDICTED: lysine--tRNA ligase, chloroplastic/mitochondrial	0	lysyl-tRNA synthetase [Thermosynechococcus elongatus BP-1]	0	Lysyl-tRNA synthetase (class II)	4.23e-54	COG1190@1|root,KOG1885@2759|Eukaryota,37Q3H@33090|Viridiplantae,3GDRK@35493|Streptophyta,44EDU@71274|asterids	0.0	Lysine--tRNA ligase, chloroplastic/mitochondrial OS=Arabidopsis thaliana OX=3702 GN=OVA5 PE=2 SV=1	0	tRNA_anti-codon & tRNA-synt_2
PB.26.1	-	-	PREDICTED: Solanum tuberosum uncharacterized LOC102592029 (LOC102592029), transcript variant X3, mRNA	0	PREDICTED: uncharacterized protein LOC102592029 isoform X3	2.71e-141	#N/A	#N/A	0	2.11e-07	2CXJ7@1|root,2RXYV@2759|Eukaryota,37U73@33090|Viridiplantae,3GIDD@35493|Streptophyta,44J9T@71274|asterids	5.1e-125	#N/A	#N/A	DUF1639
PB.27.1	-	-	PREDICTED: Solanum tuberosum uncharacterized LOC102592029 (LOC102592029), transcript variant X1, mRNA	0	PREDICTED: uncharacterized protein LOC102592029 isoform X1	1.29e-140	#N/A	#N/A	0	9.86e-08	2CXJ7@1|root,2RXYV@2759|Eukaryota,37U73@33090|Viridiplantae,3GIDD@35493|Streptophyta,44J9T@71274|asterids	6.15e-124	#N/A	#N/A	DUF1639
PB.27.2	-	-	PREDICTED: Solanum tuberosum uncharacterized LOC102592029 (LOC102592029), transcript variant X1, mRNA	0	PREDICTED: uncharacterized protein LOC102592029 isoform X1	4.25e-142	#N/A	#N/A	0	1.07e-07	2CXJ7@1|root,2RXYV@2759|Eukaryota,37U73@33090|Viridiplantae,3GIDD@35493|Streptophyta,44J9T@71274|asterids	2.06e-122	#N/A	#N/A	DUF1639
PB.27.3	-	-	PREDICTED: Solanum tuberosum uncharacterized LOC102592029 (LOC102592029), transcript variant X1, mRNA	0	PREDICTED: uncharacterized protein LOC102592029 isoform X1	4.25e-142	#N/A	#N/A	0	1.07e-07	2CXJ7@1|root,2RXYV@2759|Eukaryota,37U73@33090|Viridiplantae,3GIDD@35493|Streptophyta,44J9T@71274|asterids	2.06e-122	#N/A	#N/A	DUF1639
PB.27.4	-	-	PREDICTED: Solanum tuberosum uncharacterized LOC102592029 (LOC102592029), transcript variant X1, mRNA	0	PREDICTED: uncharacterized protein LOC102592029 isoform X1	4.25e-142	#N/A	#N/A	0	1.07e-07	2CXJ7@1|root,2RXYV@2759|Eukaryota,37U73@33090|Viridiplantae,3GIDD@35493|Streptophyta,44J9T@71274|asterids	2.06e-122	#N/A	#N/A	DUF1639
PB.28.1	-	GO:0003674,GO:0003756,GO:0003824,GO:0005575,GO:0005622,GO:0005623,GO:0005737,GO:0005783,GO:0006457,GO:0006950,GO:0008150,GO:0009987,GO:0012505,GO:0016853,GO:0016860,GO:0016864,GO:0033554,GO:0034976,GO:0043226,GO:0043227,GO:0043229,GO:0043231,GO:0044424,GO:0044444,GO:0044464,GO:0050896,GO:0051716,GO:0140096	PREDICTED: Solanum tuberosum 5'-adenylylsulfate reductase-like 5 (LOC102592701), mRNA	0	hypothetical protein KY289_003985	0	#N/A	#N/A	Thioredoxin	5.45e-72	KOG2640@1|root,KOG2640@2759|Eukaryota,37JYA@33090|Viridiplantae,3GBBP@35493|Streptophyta,44BH3@71274|asterids	7.63e-199	5'-adenylylsulfate reductase-like 5 OS=Arabidopsis thaliana OX=3702 GN=APRL5 PE=2 SV=1	6.01e-82	Thioredoxin
PB.28.2	-	GO:0003674,GO:0003756,GO:0003824,GO:0005575,GO:0005622,GO:0005623,GO:0005737,GO:0005783,GO:0006457,GO:0006950,GO:0008150,GO:0009987,GO:0012505,GO:0016853,GO:0016860,GO:0016864,GO:0033554,GO:0034976,GO:0043226,GO:0043227,GO:0043229,GO:0043231,GO:0044424,GO:0044444,GO:0044464,GO:0050896,GO:0051716,GO:0140096	PREDICTED: Solanum tuberosum 5'-adenylylsulfate reductase-like 5 (LOC102592701), mRNA	0	hypothetical protein KY289_003985	0	#N/A	#N/A	Thioredoxin	2.33e-71	KOG2640@1|root,KOG2640@2759|Eukaryota,37JYA@33090|Viridiplantae,3GBBP@35493|Streptophyta,44BH3@71274|asterids	1.54e-198	5'-adenylylsulfate reductase-like 5 OS=Arabidopsis thaliana OX=3702 GN=APRL5 PE=2 SV=1	4.63e-82	Thioredoxin
PB.28.3	-	GO:0003674,GO:0003756,GO:0003824,GO:0005575,GO:0005622,GO:0005623,GO:0005737,GO:0005783,GO:0006457,GO:0006950,GO:0008150,GO:0009987,GO:0012505,GO:0016853,GO:0016860,GO:0016864,GO:0033554,GO:0034976,GO:0043226,GO:0043227,GO:0043229,GO:0043231,GO:0044424,GO:0044444,GO:0044464,GO:0050896,GO:0051716,GO:0140096	PREDICTED: Solanum tuberosum 5'-adenylylsulfate reductase-like 5 (LOC102592701), mRNA	0	hypothetical protein KY289_003985	0	#N/A	#N/A	Thioredoxin	2.33e-71	KOG2640@1|root,KOG2640@2759|Eukaryota,37JYA@33090|Viridiplantae,3GBBP@35493|Streptophyta,44BH3@71274|asterids	1.54e-198	5'-adenylylsulfate reductase-like 5 OS=Arabidopsis thaliana OX=3702 GN=APRL5 PE=2 SV=1	4.63e-82	Thioredoxin
PB.29.1	ko:K00031	GO:0003674,GO:0003824,GO:0004448,GO:0004450,GO:0005488,GO:0005507,GO:0005575,GO:0005576,GO:0005622,GO:0005623,GO:0005737,GO:0005829,GO:0005886,GO:0005911,GO:0006082,GO:0006102,GO:0006139,GO:0006725,GO:0006732,GO:0006733,GO:0006739,GO:0006753,GO:0006793,GO:0006796,GO:0006807,GO:0006950,GO:0006952,GO:0006970,GO:0008150,GO:0008152,GO:0009117,GO:0009506,GO:0009507,GO:0009532,GO:0009536,GO:0009570,GO:…	S.tuberosum mRNA for NADP-dependent isocitrate dehydrogenase	0	hypothetical protein KY289_004755	0	isocitrate dehydrogenase Icd [Desulfobacula toluolica Tol2]	2.61e-124	NADP-dependent isocitrate dehydrogenase	6.76e-143	COG0538@1|root,KOG1526@2759|Eukaryota,37IAT@33090|Viridiplantae,3GCE8@35493|Streptophyta,44GNJ@71274|asterids	7.28e-185	Isocitrate dehydrogenase [NADP] OS=Solanum tuberosum OX=4113 GN=ICDH-1 PE=2 SV=1	0	Iso_dh
PB.29.2	ko:K00031	GO:0003674,GO:0003824,GO:0004448,GO:0004450,GO:0005488,GO:0005507,GO:0005575,GO:0005576,GO:0005622,GO:0005623,GO:0005737,GO:0005829,GO:0005886,GO:0005911,GO:0006082,GO:0006102,GO:0006139,GO:0006725,GO:0006732,GO:0006733,GO:0006739,GO:0006753,GO:0006793,GO:0006796,GO:0006807,GO:0006950,GO:0006952,GO:0006970,GO:0008150,GO:0008152,GO:0009117,GO:0009506,GO:0009507,GO:0009532,GO:0009536,GO:0009570,GO:…	S.tuberosum mRNA for NADP-dependent isocitrate dehydrogenase	0	hypothetical protein KY289_004755	0	isocitrate dehydrogenase [Bdellovibrio bacteriovorus HD100]	0	NADP-dependent isocitrate dehydrogenase	0	COG0538@1|root,KOG1526@2759|Eukaryota,37IAT@33090|Viridiplantae,3GCE8@35493|Streptophyta,44GNJ@71274|asterids	4.07e-308	Isocitrate dehydrogenase [NADP] OS=Solanum tuberosum OX=4113 GN=ICDH-1 PE=2 SV=1	0	Iso_dh
PB.29.3	ko:K00031	GO:0003674,GO:0003824,GO:0004448,GO:0004450,GO:0005488,GO:0005507,GO:0005575,GO:0005576,GO:0005622,GO:0005623,GO:0005737,GO:0005829,GO:0005886,GO:0005911,GO:0006082,GO:0006102,GO:0006139,GO:0006725,GO:0006732,GO:0006733,GO:0006739,GO:0006753,GO:0006793,GO:0006796,GO:0006807,GO:0006950,GO:0006952,GO:0006970,GO:0008150,GO:0008152,GO:0009117,GO:0009506,GO:0009507,GO:0009532,GO:0009536,GO:0009570,GO:…	S.tuberosum mRNA for NADP-dependent isocitrate dehydrogenase	0	hypothetical protein KY289_004755	0	isocitrate dehydrogenase [Bdellovibrio bacteriovorus HD100]	0	NADP-dependent isocitrate dehydrogenase	0	COG0538@1|root,KOG1526@2759|Eukaryota,37IAT@33090|Viridiplantae,3GCE8@35493|Streptophyta,44GNJ@71274|asterids	2.02e-308	Isocitrate dehydrogenase [NADP] OS=Solanum tuberosum OX=4113 GN=ICDH-1 PE=2 SV=1	0	Iso_dh
PB.29.4	ko:K00031	GO:0003674,GO:0003824,GO:0004448,GO:0004450,GO:0005488,GO:0005507,GO:0005575,GO:0005576,GO:0005622,GO:0005623,GO:0005737,GO:0005829,GO:0005886,GO:0005911,GO:0006082,GO:0006102,GO:0006139,GO:0006725,GO:0006732,GO:0006733,GO:0006739,GO:0006753,GO:0006793,GO:0006796,GO:0006807,GO:0006950,GO:0006952,GO:0006970,GO:0008150,GO:0008152,GO:0009117,GO:0009506,GO:0009507,GO:0009532,GO:0009536,GO:0009570,GO:…	S.tuberosum mRNA for NADP-dependent isocitrate dehydrogenase	0	hypothetical protein KY289_004755	0	isocitrate dehydrogenase [Bdellovibrio bacteriovorus HD100]	0	NADP-dependent isocitrate dehydrogenase	0	COG0538@1|root,KOG1526@2759|Eukaryota,37IAT@33090|Viridiplantae,3GCE8@35493|Streptophyta,44GNJ@71274|asterids	2.02e-308	Isocitrate dehydrogenase [NADP] OS=Solanum tuberosum OX=4113 GN=ICDH-1 PE=2 SV=1	0	Iso_dh
PB.29.5	ko:K00031	GO:0003674,GO:0003824,GO:0004448,GO:0004450,GO:0005488,GO:0005507,GO:0005575,GO:0005576,GO:0005622,GO:0005623,GO:0005737,GO:0005829,GO:0005886,GO:0005911,GO:0006082,GO:0006102,GO:0006139,GO:0006725,GO:0006732,GO:0006733,GO:0006739,GO:0006753,GO:0006793,GO:0006796,GO:0006807,GO:0006950,GO:0006952,GO:0006970,GO:0008150,GO:0008152,GO:0009117,GO:0009506,GO:0009507,GO:0009532,GO:0009536,GO:0009570,GO:…	S.tuberosum mRNA for NADP-dependent isocitrate dehydrogenase	0	hypothetical protein KY289_004755	0	isocitrate dehydrogenase [Bdellovibrio bacteriovorus HD100]	0	NADP-dependent isocitrate dehydrogenase	0	COG0538@1|root,KOG1526@2759|Eukaryota,37IAT@33090|Viridiplantae,3GCE8@35493|Streptophyta,44GNJ@71274|asterids	3.11e-287	Isocitrate dehydrogenase [NADP] OS=Solanum tuberosum OX=4113 GN=ICDH-1 PE=2 SV=1	0	Iso_dh
PB.29.6	ko:K00031	GO:0003674,GO:0003824,GO:0004448,GO:0004450,GO:0005488,GO:0005507,GO:0005575,GO:0005576,GO:0005622,GO:0005623,GO:0005737,GO:0005829,GO:0005886,GO:0005911,GO:0006082,GO:0006102,GO:0006139,GO:0006725,GO:0006732,GO:0006733,GO:0006739,GO:0006753,GO:0006793,GO:0006796,GO:0006807,GO:0006950,GO:0006952,GO:0006970,GO:0008150,GO:0008152,GO:0009117,GO:0009506,GO:0009507,GO:0009532,GO:0009536,GO:0009570,GO:…	S.tuberosum mRNA for NADP-dependent isocitrate dehydrogenase	0	hypothetical protein KY289_004755	0	isocitrate dehydrogenase [Bdellovibrio bacteriovorus HD100]	0	NADP-dependent isocitrate dehydrogenase	0	COG0538@1|root,KOG1526@2759|Eukaryota,37IAT@33090|Viridiplantae,3GCE8@35493|Streptophyta,44GNJ@71274|asterids	8.56e-287	Isocitrate dehydrogenase [NADP] OS=Solanum tuberosum OX=4113 GN=ICDH-1 PE=2 SV=1	0	Iso_dh
PB.29.7	ko:K00031	GO:0003674,GO:0003824,GO:0004448,GO:0004450,GO:0005488,GO:0005507,GO:0005575,GO:0005576,GO:0005622,GO:0005623,GO:0005737,GO:0005829,GO:0005886,GO:0005911,GO:0006082,GO:0006102,GO:0006139,GO:0006725,GO:0006732,GO:0006733,GO:0006739,GO:0006753,GO:0006793,GO:0006796,GO:0006807,GO:0006950,GO:0006952,GO:0006970,GO:0008150,GO:0008152,GO:0009117,GO:0009506,GO:0009507,GO:0009532,GO:0009536,GO:0009570,GO:…	S.tuberosum mRNA for NADP-dependent isocitrate dehydrogenase	0	hypothetical protein KY289_004755	0	isocitrate dehydrogenase Icd [Desulfobacula toluolica Tol2]	5.35e-170	NADP-dependent isocitrate dehydrogenase	0	COG0538@1|root,KOG1526@2759|Eukaryota,37IAT@33090|Viridiplantae,3GCE8@35493|Streptophyta,44GNJ@71274|asterids	1.89e-243	Isocitrate dehydrogenase [NADP] OS=Solanum tuberosum OX=4113 GN=ICDH-1 PE=2 SV=1	0	Iso_dh
PB.29.8	ko:K00031	GO:0003674,GO:0003824,GO:0004448,GO:0004450,GO:0005488,GO:0005507,GO:0005575,GO:0005576,GO:0005622,GO:0005623,GO:0005737,GO:0005829,GO:0005886,GO:0005911,GO:0006082,GO:0006102,GO:0006139,GO:0006725,GO:0006732,GO:0006733,GO:0006739,GO:0006753,GO:0006793,GO:0006796,GO:0006807,GO:0006950,GO:0006952,GO:0006970,GO:0008150,GO:0008152,GO:0009117,GO:0009506,GO:0009507,GO:0009532,GO:0009536,GO:0009570,GO:…	S.tuberosum mRNA for NADP-dependent isocitrate dehydrogenase	0	hypothetical protein KY289_004755	3.5e-155	isocitrate dehydrogenase Icd [Desulfobacula toluolica Tol2]	9.32e-109	NADP-dependent isocitrate dehydrogenase	1.29e-126	COG0538@1|root,KOG1526@2759|Eukaryota,37IAT@33090|Viridiplantae,3GCE8@35493|Streptophyta,44GNJ@71274|asterids	6.09e-153	Isocitrate dehydrogenase [NADP] OS=Solanum tuberosum OX=4113 GN=ICDH-1 PE=2 SV=1	3.04e-156	Iso_dh
PB.30.1	-	-	PREDICTED: Solanum tuberosum uncharacterized LOC102594587 (LOC102594587), transcript variant X2, mRNA	0	hypothetical protein KY290_003650	0	#N/A	#N/A	0	3.93e-74	28IH3@1|root,2QQTW@2759|Eukaryota,37MCT@33090|Viridiplantae,3GXGP@35493|Streptophyta,44MVG@71274|asterids	1.18e-226	#N/A	#N/A	A_thal_3526
PB.30.2	-	-	PREDICTED: Solanum tuberosum uncharacterized LOC102594587 (LOC102594587), transcript variant X2, mRNA	0	hypothetical protein KY290_003650	0	#N/A	#N/A	0	3.93e-74	28IH3@1|root,2QQTW@2759|Eukaryota,37MCT@33090|Viridiplantae,3GXGP@35493|Streptophyta,44MVG@71274|asterids	1.18e-226	#N/A	#N/A	A_thal_3526
PB.31.1	-	-	Solanum tuberosum cultivar Solyntus chromosome 1	0	hypothetical protein H5410_000165	0	#N/A	#N/A	#N/A	#N/A	28JVW@1|root,2QSA0@2759|Eukaryota,37MHC@33090|Viridiplantae,3GA7I@35493|Streptophyta,44NB8@71274|asterids	4.06e-189	BTB/POZ domain-containing protein At3g05675 OS=Arabidopsis thaliana OX=3702 GN=At3g05675 PE=2 SV=1	1.5e-67	#N/A
PB.32.1	ko:K15104	-	Solanum tuberosum mitochondrial dicarboxylate/tricarboxylate transporter DTC-like (LOC102593041), mRNA_x005f_x0001_X99853.1 S.tuberosum mRNA for oxoglutarate malate translocator	0	hypothetical protein KY290_000060	0	#N/A	#N/A	Mitochondrial oxoglutarate/malate carrier proteins	0	KOG0759@1|root,KOG0759@2759|Eukaryota,37NII@33090|Viridiplantae,3G7AV@35493|Streptophyta,44QD7@71274|asterids	1.16e-211	Mitochondrial dicarboxylate/tricarboxylate transporter DTC OS=Arabidopsis thaliana OX=3702 GN=DTC PE=1 SV=1	0	Mito_carr
PB.32.2	ko:K15104	-	Solanum tuberosum mitochondrial dicarboxylate/tricarboxylate transporter DTC-like (LOC102593041), mRNA_x005f_x0001_X99853.1 S.tuberosum mRNA for oxoglutarate malate translocator	0	hypothetical protein KY290_000060	3.48e-149	#N/A	#N/A	Mitochondrial oxoglutarate/malate carrier proteins	2.49e-135	KOG0759@1|root,KOG0759@2759|Eukaryota,37NII@33090|Viridiplantae,3G7AV@35493|Streptophyta,44QD7@71274|asterids	5.14e-143	Mitochondrial dicarboxylate/tricarboxylate transporter DTC OS=Arabidopsis thaliana OX=3702 GN=DTC PE=1 SV=1	8.37e-135	Mito_carr
PB.32.3	ko:K15104	-	Solanum tuberosum mitochondrial dicarboxylate/tricarboxylate transporter DTC-like (LOC102593041), mRNA_x005f_x0001_X99853.1 S.tuberosum mRNA for oxoglutarate malate translocator	0	hypothetical protein KY290_000060	0	#N/A	#N/A	Mitochondrial oxoglutarate/malate carrier proteins	0	KOG0759@1|root,KOG0759@2759|Eukaryota,37NII@33090|Viridiplantae,3G7AV@35493|Streptophyta,44QD7@71274|asterids	1.16e-211	Mitochondrial dicarboxylate/tricarboxylate transporter DTC OS=Arabidopsis thaliana OX=3702 GN=DTC PE=1 SV=1	0	Mito_carr
PB.32.4	ko:K15104	-	Solanum tuberosum mitochondrial dicarboxylate/tricarboxylate transporter DTC-like (LOC102593041), mRNA_x005f_x0001_X99853.1 S.tuberosum mRNA for oxoglutarate malate translocator	0	hypothetical protein KY290_000060	0	#N/A	#N/A	Mitochondrial oxoglutarate/malate carrier proteins	0	KOG0759@1|root,KOG0759@2759|Eukaryota,37NII@33090|Viridiplantae,3G7AV@35493|Streptophyta,44QD7@71274|asterids	1.16e-211	Mitochondrial dicarboxylate/tricarboxylate transporter DTC OS=Arabidopsis thaliana OX=3702 GN=DTC PE=1 SV=1	0	Mito_carr
PB.32.5	ko:K15104	-	Solanum tuberosum mitochondrial dicarboxylate/tricarboxylate transporter DTC-like (LOC102593041), mRNA_x005f_x0001_X99853.1 S.tuberosum mRNA for oxoglutarate malate translocator	0	hypothetical protein KY290_000060	4.27e-118	#N/A	#N/A	Mitochondrial oxoglutarate/malate carrier proteins	5.68e-106	KOG0759@1|root,KOG0759@2759|Eukaryota,37NII@33090|Viridiplantae,3G7AV@35493|Streptophyta,44QD7@71274|asterids	2.8e-113	Mitochondrial dicarboxylate/tricarboxylate transporter DTC OS=Arabidopsis thaliana OX=3702 GN=DTC PE=1 SV=1	1.91e-105	Mito_carr
PB.32.6	ko:K15104	-	Solanum tuberosum mitochondrial dicarboxylate/tricarboxylate transporter DTC-like (LOC102593041), mRNA_x005f_x0001_X99853.1 S.tuberosum mRNA for oxoglutarate malate translocator	0	hypothetical protein KY290_000060	0	#N/A	#N/A	Mitochondrial oxoglutarate/malate carrier proteins	0	KOG0759@1|root,KOG0759@2759|Eukaryota,37NII@33090|Viridiplantae,3G7AV@35493|Streptophyta,44QD7@71274|asterids	1.16e-211	Mitochondrial dicarboxylate/tricarboxylate transporter DTC OS=Arabidopsis thaliana OX=3702 GN=DTC PE=1 SV=1	0	Mito_carr
PB.32.7	ko:K15104	-	Solanum tuberosum mitochondrial dicarboxylate/tricarboxylate transporter DTC-like (LOC102593041), mRNA_x005f_x0001_X99853.1 S.tuberosum mRNA for oxoglutarate malate translocator	0	hypothetical protein KY290_000060	0	#N/A	#N/A	Mitochondrial oxoglutarate/malate carrier proteins	4.54e-166	KOG0759@1|root,KOG0759@2759|Eukaryota,37NII@33090|Viridiplantae,3G7AV@35493|Streptophyta,44QD7@71274|asterids	1.15e-177	Mitochondrial dicarboxylate/tricarboxylate transporter DTC OS=Arabidopsis thaliana OX=3702 GN=DTC PE=1 SV=1	1.53e-165	Mito_carr
PB.32.8	ko:K15104	-	Solanum tuberosum mitochondrial dicarboxylate/tricarboxylate transporter DTC-like (LOC102593041), mRNA_x005f_x0001_X99853.1 S.tuberosum mRNA for oxoglutarate malate translocator	1.63e-168	hypothetical protein KY290_000060	7.47e-75	#N/A	#N/A	Mitochondrial oxoglutarate/malate carrier proteins	8.26e-65	KOG0759@1|root,KOG0759@2759|Eukaryota,37NII@33090|Viridiplantae,3G7AV@35493|Streptophyta,44QD7@71274|asterids	2.36e-72	Mitochondrial dicarboxylate/tricarboxylate transporter DTC OS=Arabidopsis thaliana OX=3702 GN=DTC PE=1 SV=1	2.78e-64	Mito_carr
PB.32.9	ko:K15104	-	Solanum tuberosum mitochondrial dicarboxylate/tricarboxylate transporter DTC-like (LOC102593041), mRNA_x005f_x0001_X99853.1 S.tuberosum mRNA for oxoglutarate malate translocator	0	hypothetical protein KY290_000060	2.55e-147	#N/A	#N/A	Mitochondrial oxoglutarate/malate carrier proteins	3.25e-133	KOG0759@1|root,KOG0759@2759|Eukaryota,37NII@33090|Viridiplantae,3G7AV@35493|Streptophyta,44QD7@71274|asterids	3.06e-141	Mitochondrial dicarboxylate/tricarboxylate transporter DTC OS=Arabidopsis thaliana OX=3702 GN=DTC PE=1 SV=1	1.09e-132	Mito_carr
PB.32.10	ko:K15104	-	Solanum tuberosum mitochondrial dicarboxylate/tricarboxylate transporter DTC-like (LOC102593041), mRNA_x005f_x0001_X99853.1 S.tuberosum mRNA for oxoglutarate malate translocator	0	hypothetical protein KY290_000060	0	#N/A	#N/A	Mitochondrial oxoglutarate/malate carrier proteins	0	KOG0759@1|root,KOG0759@2759|Eukaryota,37NII@33090|Viridiplantae,3G7AV@35493|Streptophyta,44QD7@71274|asterids	1.16e-211	Mitochondrial dicarboxylate/tricarboxylate transporter DTC OS=Arabidopsis thaliana OX=3702 GN=DTC PE=1 SV=1	0	Mito_carr
PB.32.11	ko:K15104	-	Solanum tuberosum mitochondrial dicarboxylate/tricarboxylate transporter DTC-like (LOC102593041), mRNA_x005f_x0001_X99853.1 S.tuberosum mRNA for oxoglutarate malate translocator	0	hypothetical protein KY290_000060	0	#N/A	#N/A	Mitochondrial oxoglutarate/malate carrier proteins	0	KOG0759@1|root,KOG0759@2759|Eukaryota,37NII@33090|Viridiplantae,3G7AV@35493|Streptophyta,44QD7@71274|asterids	1.16e-211	Mitochondrial dicarboxylate/tricarboxylate transporter DTC OS=Arabidopsis thaliana OX=3702 GN=DTC PE=1 SV=1	0	Mito_carr
PB.32.12	ko:K15104	-	Solanum tuberosum mitochondrial dicarboxylate/tricarboxylate transporter DTC-like (LOC102593041), mRNA_x005f_x0001_X99853.1 S.tuberosum mRNA for oxoglutarate malate translocator	0	hypothetical protein KY290_000060	0	#N/A	#N/A	Mitochondrial oxoglutarate/malate carrier proteins	0	KOG0759@1|root,KOG0759@2759|Eukaryota,37NII@33090|Viridiplantae,3G7AV@35493|Streptophyta,44QD7@71274|asterids	1.16e-211	Mitochondrial dicarboxylate/tricarboxylate transporter DTC OS=Arabidopsis thaliana OX=3702 GN=DTC PE=1 SV=1	0	Mito_carr
PB.32.13	ko:K15104	-	Solanum tuberosum mitochondrial dicarboxylate/tricarboxylate transporter DTC-like (LOC102593041), mRNA_x005f_x0001_X99853.1 S.tuberosum mRNA for oxoglutarate malate translocator	0	hypothetical protein KY290_000060	0	#N/A	#N/A	Mitochondrial oxoglutarate/malate carrier proteins	0	KOG0759@1|root,KOG0759@2759|Eukaryota,37NII@33090|Viridiplantae,3G7AV@35493|Streptophyta,44QD7@71274|asterids	1.16e-211	Mitochondrial dicarboxylate/tricarboxylate transporter DTC OS=Arabidopsis thaliana OX=3702 GN=DTC PE=1 SV=1	0	Mito_carr
PB.32.14	ko:K15104	-	Solanum tuberosum mitochondrial dicarboxylate/tricarboxylate transporter DTC-like (LOC102593041), mRNA_x005f_x0001_X99853.1 S.tuberosum mRNA for oxoglutarate malate translocator	0	hypothetical protein KY290_000060	0	#N/A	#N/A	Mitochondrial oxoglutarate/malate carrier proteins	0	KOG0759@1|root,KOG0759@2759|Eukaryota,37NII@33090|Viridiplantae,3G7AV@35493|Streptophyta,44QD7@71274|asterids	1.16e-211	Mitochondrial dicarboxylate/tricarboxylate transporter DTC OS=Arabidopsis thaliana OX=3702 GN=DTC PE=1 SV=1	0	Mito_carr
PB.33.1	-	-	PREDICTED: Solanum tuberosum uncharacterized LOC102596121 (LOC102596121), mRNA	0	hypothetical protein H5410_000168, partial	0	#N/A	#N/A	#N/A	#N/A	28P4T@1|root,2QV1M@2759|Eukaryota,37JYI@33090|Viridiplantae,3GFB4@35493|Streptophyta,44MFQ@71274|asterids	3.49e-234	#N/A	#N/A	O-FucT
PB.33.2	-	-	PREDICTED: Solanum tuberosum uncharacterized LOC102596121 (LOC102596121), mRNA	0	hypothetical protein H5410_000168, partial	0	#N/A	#N/A	#N/A	#N/A	28P4T@1|root,2QV1M@2759|Eukaryota,37JYI@33090|Viridiplantae,3GFB4@35493|Streptophyta,44MFQ@71274|asterids	0.0	#N/A	#N/A	O-FucT
PB.33.3	-	-	PREDICTED: Solanum tuberosum uncharacterized LOC102596121 (LOC102596121), mRNA	0	hypothetical protein H5410_000168, partial	0	#N/A	#N/A	#N/A	#N/A	28P4T@1|root,2QV1M@2759|Eukaryota,37JYI@33090|Viridiplantae,3GFB4@35493|Streptophyta,44MFQ@71274|asterids	0.0	#N/A	#N/A	O-FucT
PB.34.1	-	-	PREDICTED: Solanum tuberosum uncharacterized LOC102596455 (LOC102596455), transcript variant X3, mRNA	0	uncharacterized protein LOC101246852 isoform X3	1.17e-130	#N/A	#N/A	0	2.37e-08	28ITG@1|root,2QR4U@2759|Eukaryota,37P39@33090|Viridiplantae,3GE2D@35493|Streptophyta,44RZX@71274|asterids	6.4e-130	#N/A	#N/A	SWIM & DBD_Tnp_Mut
PB.34.2	-	-	PREDICTED: Solanum tuberosum uncharacterized LOC102596455 (LOC102596455), transcript variant X3, mRNA	0	PREDICTED: uncharacterized protein LOC102596455	0	#N/A	#N/A	0	2.24e-39	28ITG@1|root,2QR4U@2759|Eukaryota,37P39@33090|Viridiplantae,3GE2D@35493|Streptophyta,44RZX@71274|asterids	0.0	#N/A	#N/A	DBD_Tnp_Mut & SWIM
PB.34.3	-	-	PREDICTED: Solanum tuberosum uncharacterized LOC102596455 (LOC102596455), transcript variant X3, mRNA	0	PREDICTED: uncharacterized protein LOC102596455	0	#N/A	#N/A	0	2.24e-39	28ITG@1|root,2QR4U@2759|Eukaryota,37P39@33090|Viridiplantae,3GE2D@35493|Streptophyta,44RZX@71274|asterids	0.0	#N/A	#N/A	DBD_Tnp_Mut & SWIM
PB.34.4	-	-	PREDICTED: Solanum tuberosum uncharacterized LOC102596455 (LOC102596455), transcript variant X3, mRNA	0	PREDICTED: uncharacterized protein LOC102596455	0	#N/A	#N/A	0	1.78e-39	28ITG@1|root,2QR4U@2759|Eukaryota,37P39@33090|Viridiplantae,3GE2D@35493|Streptophyta,44RZX@71274|asterids	0.0	#N/A	#N/A	DBD_Tnp_Mut & SWIM
PB.35.1	-	-	PREDICTED: Solanum tuberosum cytokinin riboside 5'-monophosphate phosphoribohydrolase LOG8-like (LOC102595783), transcript variant X2, mRNA	0	hypothetical protein H5410_000167	1.32e-145	hypothetical protein [Meiothermus silvanus DSM 9946]	3.27e-64	0	4.28e-101	COG1611@1|root,2QRI4@2759|Eukaryota,37NJ6@33090|Viridiplantae,3GFWW@35493|Streptophyta,44S6S@71274|asterids	1.34e-142	Cytokinin riboside 5'-monophosphate phosphoribohydrolase LOG8 OS=Arabidopsis thaliana OX=3702 GN=LOG8 PE=1 SV=1	3.74e-103	LDcluster4 & Lysine_decarbox
PB.36.1	ko:K14831	-	PREDICTED: Solanum tuberosum protein MAK16 homolog (LOC102600507), transcript variant X2, mRNA	0	hypothetical protein KY289_011258	0	#N/A	#N/A	#N/A	#N/A	COG5129@1|root,KOG3064@2759|Eukaryota,37PSW@33090|Viridiplantae,3GBCC@35493|Streptophyta,44G3B@71274|asterids	1.46e-176	Protein MAK16 homolog OS=Bos taurus OX=9913 GN=MAK16 PE=2 SV=1	2.32e-75	Ribosomal_L28e & Mak16
PB.37.1	ko:K12900	GO:0000245,GO:0000375,GO:0000377,GO:0000398,GO:0003674,GO:0003676,GO:0003723,GO:0003729,GO:0005488,GO:0005515,GO:0005575,GO:0005622,GO:0005623,GO:0005634,GO:0005654,GO:0005730,GO:0005737,GO:0005829,GO:0005886,GO:0006139,GO:0006355,GO:0006376,GO:0006396,GO:0006397,GO:0006725,GO:0006807,GO:0006810,GO:0008150,GO:0008152,GO:0008380,GO:0009889,GO:0009892,GO:0009987,GO:0010467,GO:0010468,GO:0010556,GO:…	PREDICTED: Solanum tuberosum serine/arginine-rich SC35-like splicing factor SCL30A (LOC102600835), mRNA	0	hypothetical protein H5410_000182	1.35e-93	#N/A	#N/A	#N/A	#N/A	KOG0118@1|root,KOG0118@2759|Eukaryota,37JXW@33090|Viridiplantae,3G8F7@35493|Streptophyta,44P2F@71274|asterids	7.33e-61	Serine/arginine-rich SC35-like splicing factor SCL30A OS=Arabidopsis thaliana OX=3702 GN=SCL30A PE=1 SV=1	1.84e-20	#N/A
PB.37.2	ko:K12900	GO:0000245,GO:0000375,GO:0000377,GO:0000398,GO:0003674,GO:0003676,GO:0003723,GO:0003729,GO:0005488,GO:0005515,GO:0005575,GO:0005622,GO:0005623,GO:0005634,GO:0005654,GO:0005730,GO:0005737,GO:0005829,GO:0005886,GO:0006139,GO:0006355,GO:0006376,GO:0006396,GO:0006397,GO:0006725,GO:0006807,GO:0006810,GO:0008150,GO:0008152,GO:0008380,GO:0009889,GO:0009892,GO:0009987,GO:0010467,GO:0010468,GO:0010556,GO:…	Solanum lycopersicum cDNA, clone: LEFL1038BA06, HTC in leaf	0	hypothetical protein H5410_000182	7.02e-112	#N/A	#N/A	FOG: RRM domain	2.78e-11	KOG0118@1|root,KOG0118@2759|Eukaryota,37JXW@33090|Viridiplantae,3G8F7@35493|Streptophyta,44P2F@71274|asterids	4.66e-80	Serine/arginine-rich SC35-like splicing factor SCL30A OS=Arabidopsis thaliana OX=3702 GN=SCL30A PE=1 SV=1	1.69e-35	RRM_1
PB.37.3	ko:K12900	GO:0000245,GO:0000375,GO:0000377,GO:0000398,GO:0003674,GO:0003676,GO:0003723,GO:0003729,GO:0005488,GO:0005515,GO:0005575,GO:0005622,GO:0005623,GO:0005634,GO:0005654,GO:0005730,GO:0005737,GO:0005829,GO:0005886,GO:0006139,GO:0006355,GO:0006376,GO:0006396,GO:0006397,GO:0006725,GO:0006807,GO:0006810,GO:0008150,GO:0008152,GO:0008380,GO:0009889,GO:0009892,GO:0009987,GO:0010467,GO:0010468,GO:0010556,GO:…	PREDICTED: Solanum tuberosum serine/arginine-rich SC35-like splicing factor SCL30A (LOC102600835), mRNA	0	hypothetical protein KY284_000098	2.88e-164	RNA binding protein [Leptospira biflexa serovar Patoc strain 'Patoc 1 (Paris)']	1.46e-13	FOG: RRM domain	9.14e-31	KOG0118@1|root,KOG0118@2759|Eukaryota,37JXW@33090|Viridiplantae,3G8F7@35493|Streptophyta,44P2F@71274|asterids	1.84e-127	Serine/arginine-rich SC35-like splicing factor SCL30A OS=Arabidopsis thaliana OX=3702 GN=SCL30A PE=1 SV=1	1.88e-81	RRM_1
PB.37.4	ko:K12900	GO:0000245,GO:0000375,GO:0000377,GO:0000398,GO:0003674,GO:0003676,GO:0003723,GO:0003729,GO:0005488,GO:0005515,GO:0005575,GO:0005622,GO:0005623,GO:0005634,GO:0005654,GO:0005730,GO:0005737,GO:0005829,GO:0005886,GO:0006139,GO:0006355,GO:0006376,GO:0006396,GO:0006397,GO:0006725,GO:0006807,GO:0006810,GO:0008150,GO:0008152,GO:0008380,GO:0009889,GO:0009892,GO:0009987,GO:0010467,GO:0010468,GO:0010556,GO:…	PREDICTED: Solanum tuberosum serine/arginine-rich SC35-like splicing factor SCL30A (LOC102600835), mRNA	0	hypothetical protein KY284_000098	1.06e-163	RNA binding protein [Leptospira biflexa serovar Patoc strain 'Patoc 1 (Paris)']	1.37e-13	FOG: RRM domain	8.3e-31	KOG0118@1|root,KOG0118@2759|Eukaryota,37JXW@33090|Viridiplantae,3G8F7@35493|Streptophyta,44P2F@71274|asterids	7.87e-129	Serine/arginine-rich SC35-like splicing factor SCL30A OS=Arabidopsis thaliana OX=3702 GN=SCL30A PE=1 SV=1	3.03e-81	RRM_1
PB.37.5	ko:K12900	GO:0000245,GO:0000375,GO:0000377,GO:0000398,GO:0003674,GO:0003676,GO:0003723,GO:0003729,GO:0005488,GO:0005515,GO:0005575,GO:0005622,GO:0005623,GO:0005634,GO:0005654,GO:0005730,GO:0005737,GO:0005829,GO:0005886,GO:0006139,GO:0006355,GO:0006376,GO:0006396,GO:0006397,GO:0006725,GO:0006807,GO:0006810,GO:0008150,GO:0008152,GO:0008380,GO:0009889,GO:0009892,GO:0009987,GO:0010467,GO:0010468,GO:0010556,GO:…	PREDICTED: Solanum tuberosum serine/arginine-rich SC35-like splicing factor SCL30A (LOC102600835), mRNA	0	hypothetical protein KY284_000098	2.88e-164	RNA binding protein [Leptospira biflexa serovar Patoc strain 'Patoc 1 (Paris)']	1.46e-13	FOG: RRM domain	9.14e-31	KOG0118@1|root,KOG0118@2759|Eukaryota,37JXW@33090|Viridiplantae,3G8F7@35493|Streptophyta,44P2F@71274|asterids	1.84e-127	Serine/arginine-rich SC35-like splicing factor SCL30A OS=Arabidopsis thaliana OX=3702 GN=SCL30A PE=1 SV=1	1.88e-81	RRM_1
PB.37.6	ko:K12900	GO:0000245,GO:0000375,GO:0000377,GO:0000398,GO:0003674,GO:0003676,GO:0003723,GO:0003729,GO:0005488,GO:0005515,GO:0005575,GO:0005622,GO:0005623,GO:0005634,GO:0005654,GO:0005730,GO:0005737,GO:0005829,GO:0005886,GO:0006139,GO:0006355,GO:0006376,GO:0006396,GO:0006397,GO:0006725,GO:0006807,GO:0006810,GO:0008150,GO:0008152,GO:0008380,GO:0009889,GO:0009892,GO:0009987,GO:0010467,GO:0010468,GO:0010556,GO:…	PREDICTED: Solanum tuberosum serine/arginine-rich SC35-like splicing factor SCL30A (LOC102600835), mRNA	0	hypothetical protein H5410_000182	5.26e-93	#N/A	#N/A	#N/A	#N/A	KOG0118@1|root,KOG0118@2759|Eukaryota,37JXW@33090|Viridiplantae,3G8F7@35493|Streptophyta,44P2F@71274|asterids	3.17e-62	Serine/arginine-rich SC35-like splicing factor SCL30A OS=Arabidopsis thaliana OX=3702 GN=SCL30A PE=1 SV=1	1.73e-20	#N/A
PB.37.7	ko:K12900	GO:0000245,GO:0000375,GO:0000377,GO:0000398,GO:0003674,GO:0003676,GO:0003723,GO:0003729,GO:0005488,GO:0005515,GO:0005575,GO:0005622,GO:0005623,GO:0005634,GO:0005654,GO:0005730,GO:0005737,GO:0005829,GO:0005886,GO:0006139,GO:0006355,GO:0006376,GO:0006396,GO:0006397,GO:0006725,GO:0006807,GO:0006810,GO:0008150,GO:0008152,GO:0008380,GO:0009889,GO:0009892,GO:0009987,GO:0010467,GO:0010468,GO:0010556,GO:…	PREDICTED: Solanum tuberosum serine/arginine-rich SC35-like splicing factor SCL30A (LOC102600835), mRNA	0	hypothetical protein H5410_000182	2.47e-109	#N/A	#N/A	FOG: RRM domain	3.93e-09	KOG0118@1|root,KOG0118@2759|Eukaryota,37JXW@33090|Viridiplantae,3G8F7@35493|Streptophyta,44P2F@71274|asterids	1.65e-77	Serine/arginine-rich SC35-like splicing factor SCL30A OS=Arabidopsis thaliana OX=3702 GN=SCL30A PE=1 SV=1	3.43e-34	RRM_1
PB.38.1	ko:K19892,ko:K20217	GO:0001871,GO:0003674,GO:0003824,GO:0004553,GO:0005488,GO:0005575,GO:0005623,GO:0005886,GO:0016020,GO:0016787,GO:0016798,GO:0030246,GO:0030247,GO:0031224,GO:0031225,GO:0031226,GO:0044425,GO:0044459,GO:0044464,GO:0046658,GO:0071944	PREDICTED: Solanum tuberosum glucan endo-1,3-beta-glucosidase 4 (LOC102601178), transcript variant X3, mRNA	0	hypothetical protein H5410_000183	0	#N/A	#N/A	0	1.27e-91	2CMVR@1|root,2QS8U@2759|Eukaryota,37JNM@33090|Viridiplantae,3G9C3@35493|Streptophyta,44B8V@71274|asterids	2.62e-314	Glucan endo-1,3-beta-glucosidase 4 OS=Arabidopsis thaliana OX=3702 GN=At3g13560 PE=2 SV=1	0	Glyco_hydro_17 & X8
PB.38.2	ko:K19892,ko:K20217	GO:0001871,GO:0003674,GO:0003824,GO:0004553,GO:0005488,GO:0005575,GO:0005623,GO:0005886,GO:0016020,GO:0016787,GO:0016798,GO:0030246,GO:0030247,GO:0031224,GO:0031225,GO:0031226,GO:0044425,GO:0044459,GO:0044464,GO:0046658,GO:0071944	PREDICTED: Solanum tuberosum glucan endo-1,3-beta-glucosidase 4 (LOC102601178), transcript variant X2, mRNA	0	hypothetical protein H5410_000183	0	#N/A	#N/A	0	6.36e-101	2CMVR@1|root,2QS8U@2759|Eukaryota,37JNM@33090|Viridiplantae,3G9C3@35493|Streptophyta,44B8V@71274|asterids	5.84e-316	Glucan endo-1,3-beta-glucosidase 4 OS=Arabidopsis thaliana OX=3702 GN=At3g13560 PE=2 SV=1	0	Glyco_hydro_17 & X8
PB.38.3	ko:K19892,ko:K20217	GO:0001871,GO:0003674,GO:0003824,GO:0004553,GO:0005488,GO:0005575,GO:0005623,GO:0005886,GO:0016020,GO:0016787,GO:0016798,GO:0030246,GO:0030247,GO:0031224,GO:0031225,GO:0031226,GO:0044425,GO:0044459,GO:0044464,GO:0046658,GO:0071944	PREDICTED: Solanum tuberosum glucan endo-1,3-beta-glucosidase 4 (LOC102601178), transcript variant X2, mRNA	0	hypothetical protein H5410_000183	0	#N/A	#N/A	0	9.25e-101	2CMVR@1|root,2QS8U@2759|Eukaryota,37JNM@33090|Viridiplantae,3G9C3@35493|Streptophyta,44B8V@71274|asterids	0.0	Glucan endo-1,3-beta-glucosidase 4 OS=Arabidopsis thaliana OX=3702 GN=At3g13560 PE=2 SV=1	0	Glyco_hydro_17 & X8
PB.38.4	ko:K19892,ko:K20217	GO:0001871,GO:0003674,GO:0003824,GO:0004553,GO:0005488,GO:0005575,GO:0005623,GO:0005886,GO:0016020,GO:0016787,GO:0016798,GO:0030246,GO:0030247,GO:0031224,GO:0031225,GO:0031226,GO:0044425,GO:0044459,GO:0044464,GO:0046658,GO:0071944	PREDICTED: Solanum tuberosum glucan endo-1,3-beta-glucosidase 4 (LOC102601178), transcript variant X2, mRNA	0	hypothetical protein H5410_000183	0	#N/A	#N/A	0	4.79e-99	2CMVR@1|root,2QS8U@2759|Eukaryota,37JNM@33090|Viridiplantae,3G9C3@35493|Streptophyta,44B8V@71274|asterids	0.0	Glucan endo-1,3-beta-glucosidase 4 OS=Arabidopsis thaliana OX=3702 GN=At3g13560 PE=2 SV=1	0	Glyco_hydro_17 & X8
PB.38.5	ko:K19892,ko:K20217	GO:0001871,GO:0003674,GO:0003824,GO:0004553,GO:0005488,GO:0005575,GO:0005623,GO:0005886,GO:0016020,GO:0016787,GO:0016798,GO:0030246,GO:0030247,GO:0031224,GO:0031225,GO:0031226,GO:0044425,GO:0044459,GO:0044464,GO:0046658,GO:0071944	PREDICTED: Solanum tuberosum glucan endo-1,3-beta-glucosidase 4 (LOC102601178), transcript variant X2, mRNA	0	hypothetical protein H5410_000183	0	#N/A	#N/A	0	9.25e-101	2CMVR@1|root,2QS8U@2759|Eukaryota,37JNM@33090|Viridiplantae,3G9C3@35493|Streptophyta,44B8V@71274|asterids	0.0	Glucan endo-1,3-beta-glucosidase 4 OS=Arabidopsis thaliana OX=3702 GN=At3g13560 PE=2 SV=1	0	Glyco_hydro_17 & X8
PB.39.1	-	GO:0003674,GO:0003676,GO:0003723,GO:0003824,GO:0004518,GO:0004519,GO:0005488,GO:0005575,GO:0005622,GO:0005623,GO:0006139,GO:0006725,GO:0006807,GO:0008150,GO:0008152,GO:0009451,GO:0009987,GO:0016070,GO:0016787,GO:0016788,GO:0034641,GO:0043170,GO:0043226,GO:0043227,GO:0043229,GO:0043231,GO:0043412,GO:0044237,GO:0044238,GO:0044424,GO:0044464,GO:0046483,GO:0071704,GO:0090304,GO:0090305,GO:0097159,GO:…	Solanum tuberosum cultivar Solyntus chromosome 1	0	hypothetical protein H5410_000179	0	#N/A	#N/A	FOG: PPR repeat	2.5e-90	KOG4197@1|root,KOG4197@2759|Eukaryota,37QT6@33090|Viridiplantae,3G8YD@35493|Streptophyta,44HMU@71274|asterids	4.21e-300	Putative pentatricopeptide repeat-containing protein At1g10330 OS=Arabidopsis thaliana OX=3702 GN=PCMP-E71 PE=3 SV=1	1.06e-154	PPR_2 & PPR & E_motif
PB.39.2	-	GO:0003674,GO:0003676,GO:0003723,GO:0003824,GO:0004518,GO:0004519,GO:0005488,GO:0005575,GO:0005622,GO:0005623,GO:0006139,GO:0006725,GO:0006807,GO:0008150,GO:0008152,GO:0009451,GO:0009987,GO:0016070,GO:0016787,GO:0016788,GO:0034641,GO:0043170,GO:0043226,GO:0043227,GO:0043229,GO:0043231,GO:0043412,GO:0044237,GO:0044238,GO:0044424,GO:0044464,GO:0046483,GO:0071704,GO:0090304,GO:0090305,GO:0097159,GO:…	Solanum tuberosum cultivar Solyntus chromosome 1	0	hypothetical protein H5410_000179	0	#N/A	#N/A	FOG: PPR repeat	2.5e-90	KOG4197@1|root,KOG4197@2759|Eukaryota,37QT6@33090|Viridiplantae,3G8YD@35493|Streptophyta,44HMU@71274|asterids	4.21e-300	Putative pentatricopeptide repeat-containing protein At1g10330 OS=Arabidopsis thaliana OX=3702 GN=PCMP-E71 PE=3 SV=1	1.06e-154	PPR_2 & PPR & E_motif
PB.40.1	ko:K20217	GO:0003674,GO:0003824,GO:0004842,GO:0005575,GO:0005622,GO:0005623,GO:0005634,GO:0006464,GO:0006807,GO:0008150,GO:0008152,GO:0009987,GO:0010099,GO:0016567,GO:0016740,GO:0019538,GO:0019787,GO:0032446,GO:0036211,GO:0043170,GO:0043226,GO:0043227,GO:0043229,GO:0043231,GO:0043412,GO:0044237,GO:0044238,GO:0044260,GO:0044267,GO:0044424,GO:0044464,GO:0048580,GO:0048583,GO:0050789,GO:0050793,GO:0051239,GO:…	PREDICTED: Solanum tuberosum constitutive photomorphogenesis protein 10 (LOC102601850), transcript variant X3, mRNA	0	hypothetical protein H5410_000184	8.91e-130	ubiquitin-conjugating enzyme E2-like protein [Candidatus Caldiarchaeum subterraneum]	5.99e-13	Ubiquitin-protein ligase	1.41e-53	COG5078@1|root,KOG0417@2759|Eukaryota,37QDV@33090|Viridiplantae,3GCD0@35493|Streptophyta,44FD6@71274|asterids	2.21e-122	Constitutive photomorphogenesis protein 10 OS=Arabidopsis thaliana OX=3702 GN=COP10 PE=1 SV=1	5.66e-83	UQ_con
PB.40.2	ko:K20217	GO:0003674,GO:0003824,GO:0004842,GO:0005575,GO:0005622,GO:0005623,GO:0005634,GO:0006464,GO:0006807,GO:0008150,GO:0008152,GO:0009987,GO:0010099,GO:0016567,GO:0016740,GO:0019538,GO:0019787,GO:0032446,GO:0036211,GO:0043170,GO:0043226,GO:0043227,GO:0043229,GO:0043231,GO:0043412,GO:0044237,GO:0044238,GO:0044260,GO:0044267,GO:0044424,GO:0044464,GO:0048580,GO:0048583,GO:0050789,GO:0050793,GO:0051239,GO:…	PREDICTED: Solanum tuberosum constitutive photomorphogenesis protein 10 (LOC102601850), transcript variant X3, mRNA	9.35e-141	hypothetical protein H5410_000184	2.13e-65	#N/A	#N/A	Ubiquitin-protein ligase	1.24e-20	COG5078@1|root,KOG0417@2759|Eukaryota,37QDV@33090|Viridiplantae,3GCD0@35493|Streptophyta,44FD6@71274|asterids	1.42e-58	Constitutive photomorphogenesis protein 10 OS=Arabidopsis thaliana OX=3702 GN=COP10 PE=1 SV=1	1.12e-38	UQ_con
PB.40.3	ko:K20217	GO:0003674,GO:0003824,GO:0004842,GO:0005575,GO:0005622,GO:0005623,GO:0005634,GO:0006464,GO:0006807,GO:0008150,GO:0008152,GO:0009987,GO:0010099,GO:0016567,GO:0016740,GO:0019538,GO:0019787,GO:0032446,GO:0036211,GO:0043170,GO:0043226,GO:0043227,GO:0043229,GO:0043231,GO:0043412,GO:0044237,GO:0044238,GO:0044260,GO:0044267,GO:0044424,GO:0044464,GO:0048580,GO:0048583,GO:0050789,GO:0050793,GO:0051239,GO:…	PREDICTED: Solanum tuberosum constitutive photomorphogenesis protein 10 (LOC102601850), transcript variant X3, mRNA	0	hypothetical protein H5410_000184	8.91e-130	ubiquitin-conjugating enzyme E2-like protein [Candidatus Caldiarchaeum subterraneum]	5.99e-13	Ubiquitin-protein ligase	1.41e-53	COG5078@1|root,KOG0417@2759|Eukaryota,37QDV@33090|Viridiplantae,3GCD0@35493|Streptophyta,44FD6@71274|asterids	2.21e-122	Constitutive photomorphogenesis protein 10 OS=Arabidopsis thaliana OX=3702 GN=COP10 PE=1 SV=1	5.66e-83	UQ_con
PB.41.1	-	GO:0003333,GO:0003674,GO:0005215,GO:0005342,GO:0005575,GO:0005623,GO:0005886,GO:0005887,GO:0006810,GO:0006811,GO:0006820,GO:0006865,GO:0008150,GO:0008509,GO:0008514,GO:0015075,GO:0015171,GO:0015179,GO:0015291,GO:0015297,GO:0015318,GO:0015711,GO:0015807,GO:0015849,GO:0016020,GO:0016021,GO:0022804,GO:0022857,GO:0031224,GO:0031226,GO:0034220,GO:0044425,GO:0044459,GO:0044464,GO:0046942,GO:0046943,GO:…	PREDICTED: Solanum tuberosum probable polyamine transporter At3g13620 (LOC102602748), mRNA	0	hypothetical protein H5410_000192	0	amino acid permease [Granulicella tundricola MP5ACTX9]	1.25e-56	Amino acid transporters	2.77e-146	COG0531@1|root,KOG1287@2759|Eukaryota,37MGT@33090|Viridiplantae,3GEMB@35493|Streptophyta,44PID@71274|asterids	0.0	Probable polyamine transporter At3g13620 OS=Arabidopsis thaliana OX=3702 GN=At3g13620 PE=2 SV=1	0	AA_permease_2 & AA_permease
PB.42.1	-	-	PREDICTED: Solanum tuberosum uncharacterized LOC102603084 (LOC102603084), mRNA	0	hypothetical protein H5410_000193	0	hypothetical protein L26878 [Lactococcus lactis subsp. lactis Il1403]	3.31e-22	#N/A	#N/A	COG1963@1|root,2S0HG@2759|Eukaryota,37URE@33090|Viridiplantae,3GB9F@35493|Streptophyta,44N06@71274|asterids	1.88e-156	Uncharacterized membrane protein YuiD OS=Bacillus subtilis (strain 168) OX=224308 GN=yuiD PE=4 SV=1	4.12e-10	DUF212
PB.43.1	-	GO:0003674,GO:0005215,GO:0005488,GO:0005515,GO:0005575,GO:0005623,GO:0005886,GO:0005887,GO:0006810,GO:0008150,GO:0015203,GO:0015291,GO:0015297,GO:0015846,GO:0016020,GO:0016021,GO:0022804,GO:0022857,GO:0031224,GO:0031226,GO:0042802,GO:0044425,GO:0044459,GO:0044464,GO:0051179,GO:0051234,GO:0055085,GO:0071702,GO:0071705,GO:0071944,GO:1902047	Solanum tuberosum cultivar Solyntus chromosome 1	0	hypothetical protein KY290_000101	0	putative amino acid transporter [Kitasatospora setae KM-6054]	1.19e-60	Amino acid transporters	6.68e-145	COG0531@1|root,KOG1287@2759|Eukaryota,37MGT@33090|Viridiplantae,3GEMB@35493|Streptophyta,44HGD@71274|asterids	0.0	Probable polyamine transporter At3g13620 OS=Arabidopsis thaliana OX=3702 GN=At3g13620 PE=2 SV=1	0	AA_permease_2 & AA_permease
PB.44.1	-	-	PREDICTED: Solanum tuberosum uncharacterized LOC102603751 (LOC102603751), mRNA	0	hypothetical protein H5410_000195	0	#N/A	#N/A	#N/A	#N/A	28MPR@1|root,2QU7R@2759|Eukaryota,37M8A@33090|Viridiplantae,3GCPW@35493|Streptophyta,44H3E@71274|asterids	8.23e-271	#N/A	#N/A	#N/A
PB.45.1	ko:K11594	GO:0003674,GO:0003724,GO:0003824,GO:0004004,GO:0004386,GO:0005575,GO:0005622,GO:0005623,GO:0005634,GO:0005730,GO:0005737,GO:0006139,GO:0006725,GO:0006807,GO:0008026,GO:0008150,GO:0008152,GO:0008186,GO:0009987,GO:0010501,GO:0016070,GO:0016462,GO:0016787,GO:0016817,GO:0016818,GO:0016887,GO:0017111,GO:0031974,GO:0031981,GO:0034641,GO:0042623,GO:0043170,GO:0043226,GO:0043227,GO:0043228,GO:0043229,GO:…	PREDICTED: Solanum tuberosum DEAD-box ATP-dependent RNA helicase 11-like (LOC102604430), transcript variant X2, mRNA	0	hypothetical protein H5410_000198	0	ATP-dependent RNA helicase [Agrobacterium fabrum str. C58]	1.29e-97	ATP-dependent RNA helicase	3.95e-179	COG0513@1|root,KOG0335@2759|Eukaryota,37JVS@33090|Viridiplantae,3G92N@35493|Streptophyta,44RVN@71274|asterids	0.0	DEAD-box ATP-dependent RNA helicase 37 OS=Arabidopsis thaliana OX=3702 GN=RH37 PE=2 SV=2	0	DEAD & Helicase_C
PB.45.2	ko:K11594	GO:0003674,GO:0003724,GO:0003824,GO:0004004,GO:0004386,GO:0005575,GO:0005622,GO:0005623,GO:0005634,GO:0005730,GO:0005737,GO:0006139,GO:0006725,GO:0006807,GO:0008026,GO:0008150,GO:0008152,GO:0008186,GO:0009987,GO:0010501,GO:0016070,GO:0016462,GO:0016787,GO:0016817,GO:0016818,GO:0016887,GO:0017111,GO:0031974,GO:0031981,GO:0034641,GO:0042623,GO:0043170,GO:0043226,GO:0043227,GO:0043228,GO:0043229,GO:…	PREDICTED: Solanum tuberosum DEAD-box ATP-dependent RNA helicase 11-like (LOC102604430), transcript variant X2, mRNA	0	hypothetical protein H5410_000198	0	ATP-dependent RNA helicase [Agrobacterium fabrum str. C58]	1.29e-97	ATP-dependent RNA helicase	3.95e-179	COG0513@1|root,KOG0335@2759|Eukaryota,37JVS@33090|Viridiplantae,3G92N@35493|Streptophyta,44RVN@71274|asterids	0.0	DEAD-box ATP-dependent RNA helicase 37 OS=Arabidopsis thaliana OX=3702 GN=RH37 PE=2 SV=2	0	DEAD & Helicase_C
PB.45.3	ko:K11594	GO:0003674,GO:0003724,GO:0003824,GO:0004004,GO:0004386,GO:0005575,GO:0005622,GO:0005623,GO:0005634,GO:0005730,GO:0005737,GO:0006139,GO:0006725,GO:0006807,GO:0008026,GO:0008150,GO:0008152,GO:0008186,GO:0009987,GO:0010501,GO:0016070,GO:0016462,GO:0016787,GO:0016817,GO:0016818,GO:0016887,GO:0017111,GO:0031974,GO:0031981,GO:0034641,GO:0042623,GO:0043170,GO:0043226,GO:0043227,GO:0043228,GO:0043229,GO:…	PREDICTED: Solanum tuberosum DEAD-box ATP-dependent RNA helicase 11-like (LOC102604430), transcript variant X2, mRNA	0	hypothetical protein H5410_000198	0	ATP-dependent RNA helicase [Agrobacterium fabrum str. C58]	1.29e-97	ATP-dependent RNA helicase	3.95e-179	COG0513@1|root,KOG0335@2759|Eukaryota,37JVS@33090|Viridiplantae,3G92N@35493|Streptophyta,44RVN@71274|asterids	0.0	DEAD-box ATP-dependent RNA helicase 37 OS=Arabidopsis thaliana OX=3702 GN=RH37 PE=2 SV=2	0	DEAD & Helicase_C
PB.45.4	ko:K11594	GO:0003674,GO:0003724,GO:0003824,GO:0004004,GO:0004386,GO:0005575,GO:0005622,GO:0005623,GO:0005634,GO:0005730,GO:0005737,GO:0006139,GO:0006725,GO:0006807,GO:0008026,GO:0008150,GO:0008152,GO:0008186,GO:0009987,GO:0010501,GO:0016070,GO:0016462,GO:0016787,GO:0016817,GO:0016818,GO:0016887,GO:0017111,GO:0031974,GO:0031981,GO:0034641,GO:0042623,GO:0043170,GO:0043226,GO:0043227,GO:0043228,GO:0043229,GO:…	PREDICTED: Solanum tuberosum DEAD-box ATP-dependent RNA helicase 11-like (LOC102604430), transcript variant X2, mRNA	0	hypothetical protein H5410_000198	0	ATP-dependent RNA helicase [Agrobacterium fabrum str. C58]	1.29e-97	ATP-dependent RNA helicase	3.95e-179	COG0513@1|root,KOG0335@2759|Eukaryota,37JVS@33090|Viridiplantae,3G92N@35493|Streptophyta,44RVN@71274|asterids	0.0	DEAD-box ATP-dependent RNA helicase 37 OS=Arabidopsis thaliana OX=3702 GN=RH37 PE=2 SV=2	0	DEAD & Helicase_C
PB.46.1	ko:K04382	-	PREDICTED: Solanum tuberosum serine/threonine-protein phosphatase PP2A catalytic subunit-like (LOC102604088), mRNA	0	PREDICTED: serine/threonine-protein phosphatase PP2A catalytic subunit-like	0	bis(5'-nucleosyl)-tetraphosphatase [Vulcanisaeta distributa DSM 14429]	8.78e-41	Serine/threonine specific protein phosphatase involved in glycogen accumulation, PP2A-related	4.6e-154	COG0639@1|root,KOG0371@2759|Eukaryota,37JWZ@33090|Viridiplantae,3G89I@35493|Streptophyta,44PUT@71274|asterids	1.11e-242	Serine/threonine-protein phosphatase PP2A catalytic subunit OS=Nicotiana tabacum OX=4097 PE=2 SV=1	0	Metallophos
PB.46.2	ko:K04382	-	PREDICTED: Solanum tuberosum serine/threonine-protein phosphatase PP2A catalytic subunit-like (LOC102604088), mRNA	0	PREDICTED: serine/threonine-protein phosphatase PP2A catalytic subunit-like	0	metallophosphoesterase [Caldivirga maquilingensis IC-167]	2.2e-32	Serine/threonine specific protein phosphatase involved in glycogen accumulation, PP2A-related	4e-132	COG0639@1|root,KOG0371@2759|Eukaryota,37JWZ@33090|Viridiplantae,3G89I@35493|Streptophyta,44PUT@71274|asterids	1.04e-218	Serine/threonine-protein phosphatase PP2A catalytic subunit OS=Nicotiana tabacum OX=4097 PE=2 SV=1	0	Metallophos
PB.46.3	ko:K04382	-	PREDICTED: Solanum tuberosum serine/threonine-protein phosphatase PP2A catalytic subunit-like (LOC102604088), mRNA	0	hypothetical protein GOBAR_DD21300	4.98e-77	metallophosphoesterase [Thermogladius cellulolyticus 1633]	2.67e-08	Serine/threonine specific protein phosphatase involved in glycogen accumulation, PP2A-related	2.22e-35	COG0639@1|root,KOG0371@2759|Eukaryota,37JWZ@33090|Viridiplantae,3G89I@35493|Streptophyta,44PUT@71274|asterids	6.42e-78	Serine/threonine-protein phosphatase PP2A catalytic subunit OS=Medicago sativa OX=3879 GN=PP2A PE=2 SV=1	1.96e-75	Metallophos
PB.47.1	-	GO:0000151,GO:0005575,GO:0005622,GO:0005623,GO:0031461,GO:0031463,GO:0032991,GO:0044424,GO:0044464,GO:1902494,GO:1990234	PREDICTED: Solanum tuberosum F-box/kelch-repeat protein At1g55270 (LOC102604982), mRNA	0	hypothetical protein H5410_000199	0	Kelch repeat protein [Ferrimonas balearica DSM 9799]	2.65e-10	FOG: Kelch repeat	1.44e-13	KOG1072@1|root,KOG1072@2759|Eukaryota,37MEF@33090|Viridiplantae,3G9CJ@35493|Streptophyta,44ET7@71274|asterids	0.0	F-box/kelch-repeat protein At1g55270 OS=Arabidopsis thaliana OX=3702 GN=At1g55270 PE=2 SV=1	0	Kelch_1 & Kelch_6
PB.47.2	-	GO:0000151,GO:0005575,GO:0005622,GO:0005623,GO:0031461,GO:0031463,GO:0032991,GO:0044424,GO:0044464,GO:1902494,GO:1990234	PREDICTED: Solanum tuberosum F-box/kelch-repeat protein At1g55270 (LOC102604982), mRNA	0	hypothetical protein H5410_000199	0	Kelch repeat protein [Ferrimonas balearica DSM 9799]	2.58e-10	FOG: Kelch repeat	1.59e-13	KOG1072@1|root,KOG1072@2759|Eukaryota,37MEF@33090|Viridiplantae,3G9CJ@35493|Streptophyta,44ET7@71274|asterids	0.0	F-box/kelch-repeat protein At1g55270 OS=Arabidopsis thaliana OX=3702 GN=At1g55270 PE=2 SV=1	0	Kelch_1 & Kelch_6
PB.48.1	-	-	PREDICTED: Solanum tuberosum protein YLS3 (LOC102605660), mRNA	0	hypothetical protein H5410_000201	6.85e-134	#N/A	#N/A	0	8.38e-12	2CXS8@1|root,2RZD2@2759|Eukaryota,37V2B@33090|Viridiplantae,3GIUR@35493|Streptophyta,44K9V@71274|asterids	1.93e-125	Non-specific lipid transfer protein GPI-anchored 14 OS=Arabidopsis thaliana OX=3702 GN=LTPG14 PE=2 SV=1	2.56e-51	LTP_2 & Tryp_alpha_amyl
PB.49.1	-	-	PREDICTED: Solanum tuberosum uncharacterized LOC102578801 (LOC102578801), mRNA	0	PREDICTED: uncharacterized protein LOC102578801	0	#N/A	#N/A	#N/A	#N/A	28IF4@1|root,2QQRW@2759|Eukaryota,37S22@33090|Viridiplantae,3GGTA@35493|Streptophyta,44FT2@71274|asterids	2.36e-179	#N/A	#N/A	#N/A
PB.50.1	ko:K13095	-	Solanum tuberosum cultivar Solyntus chromosome 1	1.05e-145	hypothetical protein KY284_000114	6.59e-55	#N/A	#N/A	#N/A	#N/A	COG5176@1|root,KOG0119@2759|Eukaryota,37NFQ@33090|Viridiplantae,3G8AP@35493|Streptophyta,3HUP6@3699|Brassicales	1.21e-29	Splicing factor-like protein 1 OS=Arabidopsis thaliana OX=3702 GN=SF1 PE=1 SV=1	4e-10	#N/A
PB.50.2	ko:K13095	-	PREDICTED: Solanum tuberosum splicing factor 1 (LOC102578234), transcript variant X3, mRNA	0	hypothetical protein H5410_000204	0	#N/A	#N/A	#N/A	#N/A	COG5176@1|root,KOG0119@2759|Eukaryota,37NFQ@33090|Viridiplantae,3G8AP@35493|Streptophyta,44EN8@71274|asterids	0.0	Splicing factor-like protein 1 OS=Arabidopsis thaliana OX=3702 GN=SF1 PE=1 SV=1	2.27e-22	SF1-HH
PB.50.3	ko:K13095	-	PREDICTED: Solanum tuberosum splicing factor 1 (LOC102578234), transcript variant X3, mRNA	0	hypothetical protein H5410_000204	0	#N/A	#N/A	#N/A	#N/A	COG5176@1|root,KOG0119@2759|Eukaryota,37NFQ@33090|Viridiplantae,3G8AP@35493|Streptophyta,44EN8@71274|asterids	0.0	Splicing factor-like protein 1 OS=Arabidopsis thaliana OX=3702 GN=SF1 PE=1 SV=1	2.27e-22	SF1-HH
PB.50.4	ko:K13095	-	PREDICTED: Solanum tuberosum splicing factor 1 (LOC102578234), transcript variant X3, mRNA	0	hypothetical protein H5410_000204	0	#N/A	#N/A	#N/A	#N/A	COG5176@1|root,KOG0119@2759|Eukaryota,37NFQ@33090|Viridiplantae,3G8AP@35493|Streptophyta,44EN8@71274|asterids	0.0	Splicing factor-like protein 1 OS=Arabidopsis thaliana OX=3702 GN=SF1 PE=1 SV=1	2.27e-22	SF1-HH
PB.50.5	ko:K13095	-	Solanum tuberosum cultivar Solyntus chromosome 1	1.05e-145	hypothetical protein KY284_000114	6.59e-55	#N/A	#N/A	#N/A	#N/A	COG5176@1|root,KOG0119@2759|Eukaryota,37NFQ@33090|Viridiplantae,3G8AP@35493|Streptophyta,3HUP6@3699|Brassicales	1.21e-29	#N/A	#N/A	#N/A
PB.51.1	ko:K10696	GO:0000003,GO:0002376,GO:0003006,GO:0003674,GO:0005488,GO:0005515,GO:0005575,GO:0005622,GO:0005623,GO:0005634,GO:0006325,GO:0006464,GO:0006513,GO:0006807,GO:0006950,GO:0006952,GO:0006955,GO:0006996,GO:0007275,GO:0008150,GO:0008152,GO:0009653,GO:0009791,GO:0009965,GO:0009987,GO:0010016,GO:0010154,GO:0010162,GO:0010228,GO:0010390,GO:0010431,GO:0016043,GO:0016567,GO:0016569,GO:0016570,GO:0016574,GO:…	PREDICTED: Solanum tuberosum E3 ubiquitin-protein ligase BRE1-like 2 (LOC102579128), transcript variant X3, mRNA	0	hypothetical protein H5410_000206	0	#N/A	#N/A	#N/A	#N/A	KOG0978@1|root,KOG0978@2759|Eukaryota,37MHZ@33090|Viridiplantae,3GBBB@35493|Streptophyta,44CQR@71274|asterids	5.07e-281	E3 ubiquitin-protein ligase BRE1-like 2 OS=Arabidopsis thaliana OX=3702 GN=HUB2 PE=1 SV=2	0	zf-C3HC4_3 & zf-C3HC4_2 & zf-RING_5 & zf-C3HC4
PB.51.2	ko:K10696	GO:0000003,GO:0002376,GO:0003006,GO:0003674,GO:0005488,GO:0005515,GO:0005575,GO:0005622,GO:0005623,GO:0005634,GO:0006325,GO:0006464,GO:0006513,GO:0006807,GO:0006950,GO:0006952,GO:0006955,GO:0006996,GO:0007275,GO:0008150,GO:0008152,GO:0009653,GO:0009791,GO:0009965,GO:0009987,GO:0010016,GO:0010154,GO:0010162,GO:0010228,GO:0010390,GO:0010431,GO:0016043,GO:0016567,GO:0016569,GO:0016570,GO:0016574,GO:…	PREDICTED: Solanum tuberosum E3 ubiquitin-protein ligase BRE1-like 2 (LOC102579128), transcript variant X2, mRNA	0	PREDICTED: E3 ubiquitin-protein ligase BRE1-like 2 isoform X1	0	#N/A	#N/A	#N/A	#N/A	KOG0978@1|root,KOG0978@2759|Eukaryota,37MHZ@33090|Viridiplantae,3GBBB@35493|Streptophyta,44CQR@71274|asterids	0.0	E3 ubiquitin-protein ligase BRE1-like 2 OS=Arabidopsis thaliana OX=3702 GN=HUB2 PE=1 SV=2	0	zf-C3HC4_3 & zf-C3HC4_2 & zf-C3HC4
PB.52.1	ko:K14823	GO:0003674,GO:0003676,GO:0003723,GO:0003824,GO:0003924,GO:0005488,GO:0005575,GO:0005622,GO:0005623,GO:0005634,GO:0005730,GO:0006139,GO:0006364,GO:0006396,GO:0006725,GO:0006807,GO:0008150,GO:0008152,GO:0009987,GO:0010467,GO:0016070,GO:0016072,GO:0016462,GO:0016787,GO:0016817,GO:0016818,GO:0017111,GO:0022613,GO:0030684,GO:0030687,GO:0031974,GO:0031981,GO:0032991,GO:0034399,GO:0034470,GO:0034641,GO:…	Solanum tuberosum cultivar Solyntus chromosome 1	0	hypothetical protein KY290_000112	0	#N/A	#N/A	Nucleolar protein-like/EBNA1-binding protein	2.03e-21	KOG3080@1|root,KOG3080@2759|Eukaryota,37NRF@33090|Viridiplantae,3GCFQ@35493|Streptophyta,44C5P@71274|asterids	6.73e-191	Probable rRNA-processing protein EBP2 homolog OS=Arabidopsis thaliana OX=3702 GN=EBP2 PE=1 SV=1	1.26e-110	Ebp2
PB.53.1	ko:K02218	-	PREDICTED: Solanum tuberosum casein kinase I isoform gamma-3-like (LOC102581327), mRNA	0	hypothetical protein KY284_003832	0	peptidase c14 caspase catalytic subunit p20 [Saprospira grandis str. Lewin]	2.05e-15	Casein kinase (serine/threonine/tyrosine protein kinase)	0	KOG1164@1|root,KOG1164@2759|Eukaryota,37NP2@33090|Viridiplantae,3GCUU@35493|Streptophyta,44SIU@71274|asterids	0.0	Casein kinase 1-like protein HD16 OS=Oryza sativa subsp. japonica OX=39947 GN=HD16 PE=1 SV=1	0	Pkinase & PK_Tyr_Ser-Thr & Pkinase_fungal
PB.53.2	ko:K02218	-	PREDICTED: Solanum tuberosum casein kinase I isoform gamma-3-like (LOC102581327), mRNA	0	hypothetical protein KY289_003998	0	peptidase c14 caspase catalytic subunit p20 [Saprospira grandis str. Lewin]	3.28e-15	Casein kinase (serine/threonine/tyrosine protein kinase)	0	KOG1164@1|root,KOG1164@2759|Eukaryota,37NP2@33090|Viridiplantae,3GCUU@35493|Streptophyta,44SIU@71274|asterids	0.0	Casein kinase 1-like protein HD16 OS=Oryza sativa subsp. japonica OX=39947 GN=HD16 PE=1 SV=1	0	Pkinase & PK_Tyr_Ser-Thr & Pkinase_fungal
PB.53.3	ko:K02218	-	PREDICTED: Solanum tuberosum casein kinase I isoform gamma-3-like (LOC102581327), mRNA	0	hypothetical protein KY289_003998	0	peptidase c14 caspase catalytic subunit p20 [Saprospira grandis str. Lewin]	3.74e-15	Casein kinase (serine/threonine/tyrosine protein kinase)	0	KOG1164@1|root,KOG1164@2759|Eukaryota,37NP2@33090|Viridiplantae,3GCUU@35493|Streptophyta,44SIU@71274|asterids	0.0	Casein kinase 1-like protein HD16 OS=Oryza sativa subsp. japonica OX=39947 GN=HD16 PE=1 SV=1	0	Pkinase & PK_Tyr_Ser-Thr & Pkinase_fungal
PB.53.4	ko:K02218	-	PREDICTED: Solanum tuberosum casein kinase I isoform gamma-3-like (LOC102581327), mRNA	0	hypothetical protein KY289_003998	0	peptidase c14 caspase catalytic subunit p20 [Saprospira grandis str. Lewin]	3.28e-15	Casein kinase (serine/threonine/tyrosine protein kinase)	0	KOG1164@1|root,KOG1164@2759|Eukaryota,37NP2@33090|Viridiplantae,3GCUU@35493|Streptophyta,44SIU@71274|asterids	0.0	Casein kinase 1-like protein HD16 OS=Oryza sativa subsp. japonica OX=39947 GN=HD16 PE=1 SV=1	0	Pkinase & PK_Tyr_Ser-Thr & Pkinase_fungal
PB.53.5	ko:K02218	-	PREDICTED: Solanum tuberosum casein kinase I isoform gamma-3-like (LOC102581327), mRNA	0	hypothetical protein KY289_003998	0	peptidase c14 caspase catalytic subunit p20 [Saprospira grandis str. Lewin]	3.74e-15	Casein kinase (serine/threonine/tyrosine protein kinase)	0	KOG1164@1|root,KOG1164@2759|Eukaryota,37NP2@33090|Viridiplantae,3GCUU@35493|Streptophyta,44SIU@71274|asterids	0.0	Casein kinase 1-like protein HD16 OS=Oryza sativa subsp. japonica OX=39947 GN=HD16 PE=1 SV=1	0	Pkinase & PK_Tyr_Ser-Thr & Pkinase_fungal
PB.53.6	ko:K02218	-	PREDICTED: Solanum tuberosum casein kinase I isoform gamma-3-like (LOC102581327), mRNA	0	hypothetical protein KY289_003998	0	peptidase c14 caspase catalytic subunit p20 [Saprospira grandis str. Lewin]	3.28e-15	Casein kinase (serine/threonine/tyrosine protein kinase)	0	KOG1164@1|root,KOG1164@2759|Eukaryota,37NP2@33090|Viridiplantae,3GCUU@35493|Streptophyta,44SIU@71274|asterids	0.0	Casein kinase 1-like protein HD16 OS=Oryza sativa subsp. japonica OX=39947 GN=HD16 PE=1 SV=1	0	Pkinase & PK_Tyr_Ser-Thr & Pkinase_fungal
PB.53.7	ko:K02218	-	PREDICTED: Solanum tuberosum casein kinase I isoform gamma-3-like (LOC102581327), mRNA	0	hypothetical protein H5410_000218	1.37e-93	peptidase c14 caspase catalytic subunit p20 [Saprospira grandis str. Lewin]	8.8e-13	Casein kinase (serine/threonine/tyrosine protein kinase)	1.19e-74	KOG1164@1|root,KOG1164@2759|Eukaryota,37NP2@33090|Viridiplantae,3GCUU@35493|Streptophyta,44SIU@71274|asterids	2.48e-50	Casein kinase 1-like protein HD16 OS=Oryza sativa subsp. japonica OX=39947 GN=HD16 PE=1 SV=1	2.36e-77	#N/A
PB.53.8	ko:K02218	-	PREDICTED: Solanum tuberosum casein kinase I isoform gamma-3-like (LOC102581327), mRNA	0	hypothetical protein KY289_003998	0	peptidase c14 caspase catalytic subunit p20 [Saprospira grandis str. Lewin]	3.74e-15	Casein kinase (serine/threonine/tyrosine protein kinase)	0	KOG1164@1|root,KOG1164@2759|Eukaryota,37NP2@33090|Viridiplantae,3GCUU@35493|Streptophyta,44SIU@71274|asterids	0.0	Casein kinase 1-like protein HD16 OS=Oryza sativa subsp. japonica OX=39947 GN=HD16 PE=1 SV=1	0	Pkinase & PK_Tyr_Ser-Thr & Pkinase_fungal
PB.53.9	ko:K02218	-	PREDICTED: Solanum tuberosum casein kinase I isoform gamma-3-like (LOC102581327), mRNA	0	hypothetical protein KY284_003832	0	peptidase c14 caspase catalytic subunit p20 [Saprospira grandis str. Lewin]	2.05e-15	Casein kinase (serine/threonine/tyrosine protein kinase)	0	KOG1164@1|root,KOG1164@2759|Eukaryota,37NP2@33090|Viridiplantae,3GCUU@35493|Streptophyta,44SIU@71274|asterids	0.0	Casein kinase 1-like protein HD16 OS=Oryza sativa subsp. japonica OX=39947 GN=HD16 PE=1 SV=1	0	Pkinase & PK_Tyr_Ser-Thr & Pkinase_fungal
PB.53.10	ko:K02218	-	PREDICTED: Solanum tuberosum casein kinase I isoform gamma-3-like (LOC102581327), mRNA	0	hypothetical protein KY284_003832	0	peptidase c14 caspase catalytic subunit p20 [Saprospira grandis str. Lewin]	1.88e-15	Casein kinase (serine/threonine/tyrosine protein kinase)	0	KOG1164@1|root,KOG1164@2759|Eukaryota,37NP2@33090|Viridiplantae,3GCUU@35493|Streptophyta,44SIU@71274|asterids	0.0	Casein kinase 1-like protein HD16 OS=Oryza sativa subsp. japonica OX=39947 GN=HD16 PE=1 SV=1	0	Pkinase & PK_Tyr_Ser-Thr & Pkinase_fungal
PB.53.11	ko:K02218	-	PREDICTED: Solanum tuberosum casein kinase I isoform gamma-3-like (LOC102581327), mRNA	0	hypothetical protein KY284_003832	0	peptidase c14 caspase catalytic subunit p20 [Saprospira grandis str. Lewin]	1.19e-15	Casein kinase (serine/threonine/tyrosine protein kinase)	0	KOG1164@1|root,KOG1164@2759|Eukaryota,37NP2@33090|Viridiplantae,3GCUU@35493|Streptophyta,44SIU@71274|asterids	0.0	Casein kinase 1-like protein HD16 OS=Oryza sativa subsp. japonica OX=39947 GN=HD16 PE=1 SV=1	0	Pkinase & Pkinase_fungal
PB.53.12	ko:K02218	-	PREDICTED: Solanum tuberosum casein kinase I isoform gamma-3-like (LOC102581327), mRNA	0	hypothetical protein KY284_003832	0	peptidase c14 caspase catalytic subunit p20 [Saprospira grandis str. Lewin]	4.2e-16	Casein kinase (serine/threonine/tyrosine protein kinase)	0	KOG1164@1|root,KOG1164@2759|Eukaryota,37NP2@33090|Viridiplantae,3GCUU@35493|Streptophyta,44SIU@71274|asterids	1.62e-295	Casein kinase 1-like protein HD16 OS=Oryza sativa subsp. japonica OX=39947 GN=HD16 PE=1 SV=1	0	Pkinase & Pkinase_fungal
PB.53.13	ko:K02218	-	PREDICTED: Solanum tuberosum casein kinase I isoform gamma-3-like (LOC102581327), mRNA	0	hypothetical protein KY284_003832	0	peptidase c14 caspase catalytic subunit p20 [Saprospira grandis str. Lewin]	4.2e-16	Casein kinase (serine/threonine/tyrosine protein kinase)	0	KOG1164@1|root,KOG1164@2759|Eukaryota,37NP2@33090|Viridiplantae,3GCUU@35493|Streptophyta,44SIU@71274|asterids	1.62e-295	Casein kinase 1-like protein HD16 OS=Oryza sativa subsp. japonica OX=39947 GN=HD16 PE=1 SV=1	0	Pkinase & Pkinase_fungal
PB.53.14	ko:K02218	-	PREDICTED: Solanum tuberosum casein kinase I isoform gamma-3-like (LOC102581327), mRNA	0	hypothetical protein KY284_003832	0	peptidase c14 caspase catalytic subunit p20 [Saprospira grandis str. Lewin]	5.79e-16	Casein kinase (serine/threonine/tyrosine protein kinase)	0	KOG1164@1|root,KOG1164@2759|Eukaryota,37NP2@33090|Viridiplantae,3GCUU@35493|Streptophyta,44SIU@71274|asterids	3.21e-276	Casein kinase 1-like protein HD16 OS=Oryza sativa subsp. japonica OX=39947 GN=HD16 PE=1 SV=1	0	Pkinase
PB.53.15	ko:K02218	-	PREDICTED: Solanum tuberosum casein kinase I isoform gamma-3-like (LOC102581327), mRNA	0	hypothetical protein EJD97_015752	0	peptidase c14 caspase catalytic subunit p20 [Saprospira grandis str. Lewin]	9.56e-16	Casein kinase (serine/threonine/tyrosine protein kinase)	0	KOG1164@1|root,KOG1164@2759|Eukaryota,37NP2@33090|Viridiplantae,3GCUU@35493|Streptophyta,44SIU@71274|asterids	3.17e-241	Casein kinase 1-like protein HD16 OS=Oryza sativa subsp. japonica OX=39947 GN=HD16 PE=1 SV=1	0	#N/A
PB.53.16	ko:K02218	-	PREDICTED: Solanum tuberosum casein kinase I isoform gamma-3-like (LOC102581327), mRNA	0	hypothetical protein EJD97_015752	0	peptidase c14 caspase catalytic subunit p20 [Saprospira grandis str. Lewin]	1.74e-16	Casein kinase (serine/threonine/tyrosine protein kinase)	0	KOG1164@1|root,KOG1164@2759|Eukaryota,37NP2@33090|Viridiplantae,3GCUU@35493|Streptophyta,44SIU@71274|asterids	6.27e-191	Casein kinase 1-like protein HD16 OS=Oryza sativa subsp. japonica OX=39947 GN=HD16 PE=1 SV=1	0	#N/A
PB.53.17	ko:K02218	-	PREDICTED: Solanum tuberosum casein kinase I isoform gamma-3-like (LOC102581327), mRNA	0	hypothetical protein H5410_000218	1.35e-132	peptidase c14 caspase catalytic subunit p20 [Saprospira grandis str. Lewin]	1.38e-14	Casein kinase (serine/threonine/tyrosine protein kinase)	2.21e-105	KOG1164@1|root,KOG1164@2759|Eukaryota,37NP2@33090|Viridiplantae,3GCUU@35493|Streptophyta,44SIU@71274|asterids	2.49e-90	Casein kinase 1-like protein HD16 OS=Oryza sativa subsp. japonica OX=39947 GN=HD16 PE=1 SV=1	4.04e-108	#N/A
PB.53.18	ko:K02218	-	PREDICTED: Solanum tuberosum casein kinase I isoform gamma-3-like (LOC102581327), mRNA	0	hypothetical protein KY289_003998	3.01e-93	peptidase c14 caspase catalytic subunit p20 [Saprospira grandis str. Lewin]	1e-11	Casein kinase (serine/threonine/tyrosine protein kinase)	3.79e-74	KOG1164@1|root,KOG1164@2759|Eukaryota,37NP2@33090|Viridiplantae,3GCUU@35493|Streptophyta,44SIU@71274|asterids	2.53e-55	Casein kinase 1-like protein HD16 OS=Oryza sativa subsp. japonica OX=39947 GN=HD16 PE=1 SV=1	2.06e-77	#N/A
PB.54.1	ko:K17606	GO:0001101,GO:0001558,GO:0003674,GO:0005488,GO:0005515,GO:0005575,GO:0005622,GO:0005623,GO:0005737,GO:0005829,GO:0006808,GO:0006950,GO:0007154,GO:0007165,GO:0008150,GO:0009266,GO:0009409,GO:0009628,GO:0009719,GO:0009725,GO:0009737,GO:0009966,GO:0009967,GO:0009987,GO:0010029,GO:0010033,GO:0010187,GO:0010646,GO:0010647,GO:0010921,GO:0019208,GO:0019220,GO:0019222,GO:0019888,GO:0019899,GO:0019900,GO:…	PREDICTED: Solanum tuberosum PP2A regulatory subunit TAP46 (LOC102580983), mRNA	0	PREDICTED: PP2A regulatory subunit TAP46	0	#N/A	#N/A	Protein phosphatase 2A-associated protein	7.03e-07	KOG2830@1|root,KOG2830@2759|Eukaryota,37R62@33090|Viridiplantae,3G7E2@35493|Streptophyta,44NKN@71274|asterids	1.7e-279	PP2A regulatory subunit TAP46 OS=Nicotiana benthamiana OX=4100 GN=TAP46 PE=1 SV=1	0	TAP42
PB.54.2	ko:K17606	GO:0001101,GO:0001558,GO:0003674,GO:0005488,GO:0005515,GO:0005575,GO:0005622,GO:0005623,GO:0005737,GO:0005829,GO:0006808,GO:0006950,GO:0007154,GO:0007165,GO:0008150,GO:0009266,GO:0009409,GO:0009628,GO:0009719,GO:0009725,GO:0009737,GO:0009966,GO:0009967,GO:0009987,GO:0010029,GO:0010033,GO:0010187,GO:0010646,GO:0010647,GO:0010921,GO:0019208,GO:0019220,GO:0019222,GO:0019888,GO:0019899,GO:0019900,GO:…	PREDICTED: Solanum tuberosum PP2A regulatory subunit TAP46 (LOC102580983), mRNA	0	hypothetical protein H5410_000217	0	#N/A	#N/A	Protein phosphatase 2A-associated protein	6.84e-07	KOG2830@1|root,KOG2830@2759|Eukaryota,37R62@33090|Viridiplantae,3G7E2@35493|Streptophyta,44NKN@71274|asterids	1.7e-279	PP2A regulatory subunit TAP46 OS=Nicotiana benthamiana OX=4100 GN=TAP46 PE=1 SV=1	0	TAP42
PB.54.3	ko:K17606	GO:0001101,GO:0001558,GO:0003674,GO:0005488,GO:0005515,GO:0005575,GO:0005622,GO:0005623,GO:0005737,GO:0005829,GO:0006808,GO:0006950,GO:0007154,GO:0007165,GO:0008150,GO:0009266,GO:0009409,GO:0009628,GO:0009719,GO:0009725,GO:0009737,GO:0009966,GO:0009967,GO:0009987,GO:0010029,GO:0010033,GO:0010187,GO:0010646,GO:0010647,GO:0010921,GO:0019208,GO:0019220,GO:0019222,GO:0019888,GO:0019899,GO:0019900,GO:…	PREDICTED: Solanum tuberosum PP2A regulatory subunit TAP46 (LOC102580983), mRNA	0	hypothetical protein H5410_000217	0	#N/A	#N/A	Protein phosphatase 2A-associated protein	1.5e-06	KOG2830@1|root,KOG2830@2759|Eukaryota,37R62@33090|Viridiplantae,3G7E2@35493|Streptophyta,44NKN@71274|asterids	1.79e-254	PP2A regulatory subunit TAP46 OS=Nicotiana benthamiana OX=4100 GN=TAP46 PE=1 SV=1	0	TAP42
PB.54.4	ko:K17606	GO:0001101,GO:0001558,GO:0003674,GO:0005488,GO:0005515,GO:0005575,GO:0005622,GO:0005623,GO:0005737,GO:0005829,GO:0006808,GO:0006950,GO:0007154,GO:0007165,GO:0008150,GO:0009266,GO:0009409,GO:0009628,GO:0009719,GO:0009725,GO:0009737,GO:0009966,GO:0009967,GO:0009987,GO:0010029,GO:0010033,GO:0010187,GO:0010646,GO:0010647,GO:0010921,GO:0019208,GO:0019220,GO:0019222,GO:0019888,GO:0019899,GO:0019900,GO:…	PREDICTED: Solanum tuberosum PP2A regulatory subunit TAP46 (LOC102580983), mRNA	0	hypothetical protein H5410_000217	0	#N/A	#N/A	Protein phosphatase 2A-associated protein	6.84e-07	KOG2830@1|root,KOG2830@2759|Eukaryota,37R62@33090|Viridiplantae,3G7E2@35493|Streptophyta,44NKN@71274|asterids	1.7e-279	PP2A regulatory subunit TAP46 OS=Nicotiana benthamiana OX=4100 GN=TAP46 PE=1 SV=1	0	TAP42
PB.54.5	ko:K17606	GO:0001101,GO:0001558,GO:0003674,GO:0005488,GO:0005515,GO:0005575,GO:0005622,GO:0005623,GO:0005737,GO:0005829,GO:0006808,GO:0006950,GO:0007154,GO:0007165,GO:0008150,GO:0009266,GO:0009409,GO:0009628,GO:0009719,GO:0009725,GO:0009737,GO:0009966,GO:0009967,GO:0009987,GO:0010029,GO:0010033,GO:0010187,GO:0010646,GO:0010647,GO:0010921,GO:0019208,GO:0019220,GO:0019222,GO:0019888,GO:0019899,GO:0019900,GO:…	PREDICTED: Solanum tuberosum PP2A regulatory subunit TAP46 (LOC102580983), mRNA	0	PREDICTED: PP2A regulatory subunit TAP46	0	#N/A	#N/A	Protein phosphatase 2A-associated protein	7.03e-07	KOG2830@1|root,KOG2830@2759|Eukaryota,37R62@33090|Viridiplantae,3G7E2@35493|Streptophyta,44NKN@71274|asterids	1.7e-279	PP2A regulatory subunit TAP46 OS=Nicotiana benthamiana OX=4100 GN=TAP46 PE=1 SV=1	0	TAP42
PB.55.1	-	-	PREDICTED: Solanum tuberosum metal tolerance protein 4-like (LOC102582321), mRNA	4.74e-179	metal tolerance protein 4-like	3.94e-76	cobalt/zinc/cadmium cation efflux pump protein [Thermococcus kodakarensis KOD1]	4.78e-11	#N/A	#N/A	COG0053@1|root,KOG1485@2759|Eukaryota,37PN0@33090|Viridiplantae,3G9SF@35493|Streptophyta,44PJC@71274|asterids	3.25e-74	Metal tolerance protein 4 OS=Oryza sativa subsp. japonica OX=39947 GN=MTP4 PE=2 SV=1	1.42e-67	ZT_dimer
PB.55.2	-	-	PREDICTED: Solanum tuberosum metal tolerance protein 4-like (LOC102582321), mRNA	0	hypothetical protein H5410_000221	0	cation diffusion facilitator family transporter [Nitratifractor salsuginis DSM 16511]	5.71e-23	#N/A	#N/A	COG0053@1|root,KOG1485@2759|Eukaryota,37PN0@33090|Viridiplantae,3G9SF@35493|Streptophyta,44PJC@71274|asterids	5.36e-283	Metal tolerance protein 4 OS=Oryza sativa subsp. japonica OX=39947 GN=MTP4 PE=2 SV=1	0	Cation_efflux & ZT_dimer
PB.55.3	#N/A	#N/A	#N/A	#N/A	#N/A	#N/A	#N/A	#N/A	#N/A	#N/A	#N/A	#N/A	#N/A	#N/A	#N/A
PB.55.4	-	-	PREDICTED: Solanum tuberosum metal tolerance protein 4-like (LOC102582321), mRNA	0	hypothetical protein H5410_000221	0	cation diffusion facilitator family transporter [Nitratifractor salsuginis DSM 16511]	6.81e-23	#N/A	#N/A	COG0053@1|root,KOG1485@2759|Eukaryota,37PN0@33090|Viridiplantae,3G9SF@35493|Streptophyta,44PJC@71274|asterids	1.25e-282	Metal tolerance protein 4 OS=Oryza sativa subsp. japonica OX=39947 GN=MTP4 PE=2 SV=1	0	Cation_efflux & ZT_dimer
PB.56.1	ko:K02942	-	Solanum tuberosum acidic ribosomal protein P1a-like (LOC102577551), mRNA_x005f_x0001_DQ235177.1 Solanum tuberosum clone 157H11 acidic ribosomal protein P1a-like mRNA, complete cds	3.6e-165	60S acidic ribosomal protein P1	1.38e-71	#N/A	#N/A	60s acidic ribosomal protein P1	3.47e-39	COG2058@1|root,KOG1762@2759|Eukaryota,37V61@33090|Viridiplantae,3GJB1@35493|Streptophyta,44TIE@71274|asterids	5.19e-37	60S acidic ribosomal protein P1-2 OS=Arabidopsis thaliana OX=3702 GN=RPP1B PE=1 SV=2	5.12e-33	Ribosomal_60s
PB.56.2	#N/A	#N/A	#N/A	#N/A	#N/A	#N/A	#N/A	#N/A	#N/A	#N/A	#N/A	#N/A	#N/A	#N/A	#N/A
PB.57.1	ko:K14823	GO:0003674,GO:0003676,GO:0003723,GO:0003824,GO:0003924,GO:0005488,GO:0005575,GO:0005622,GO:0005623,GO:0005634,GO:0005730,GO:0006139,GO:0006364,GO:0006396,GO:0006725,GO:0006807,GO:0008150,GO:0008152,GO:0009987,GO:0010467,GO:0016070,GO:0016072,GO:0016462,GO:0016787,GO:0016817,GO:0016818,GO:0017111,GO:0022613,GO:0030684,GO:0030687,GO:0031974,GO:0031981,GO:0032991,GO:0034399,GO:0034470,GO:0034641,GO:…	PREDICTED: Solanum tuberosum probable rRNA-processing protein EBP2 homolog (LOC102583550), transcript variant X2, mRNA	0	hypothetical protein KY289_000117	0	#N/A	#N/A	Nucleolar protein-like/EBNA1-binding protein	3.25e-22	KOG3080@1|root,KOG3080@2759|Eukaryota,37NRF@33090|Viridiplantae,3GCFQ@35493|Streptophyta,44C5P@71274|asterids	5.45e-195	Probable rRNA-processing protein EBP2 homolog OS=Arabidopsis thaliana OX=3702 GN=EBP2 PE=1 SV=1	1.59e-112	Ebp2
PB.57.2	ko:K14823	GO:0003674,GO:0003676,GO:0003723,GO:0003824,GO:0003924,GO:0005488,GO:0005575,GO:0005622,GO:0005623,GO:0005634,GO:0005730,GO:0006139,GO:0006364,GO:0006396,GO:0006725,GO:0006807,GO:0008150,GO:0008152,GO:0009987,GO:0010467,GO:0016070,GO:0016072,GO:0016462,GO:0016787,GO:0016817,GO:0016818,GO:0017111,GO:0022613,GO:0030684,GO:0030687,GO:0031974,GO:0031981,GO:0032991,GO:0034399,GO:0034470,GO:0034641,GO:…	PREDICTED: Solanum tuberosum probable rRNA-processing protein EBP2 homolog (LOC102583550), transcript variant X2, mRNA	0	hypothetical protein KY289_000117	0	#N/A	#N/A	Nucleolar protein-like/EBNA1-binding protein	3.25e-22	KOG3080@1|root,KOG3080@2759|Eukaryota,37NRF@33090|Viridiplantae,3GCFQ@35493|Streptophyta,44C5P@71274|asterids	5.45e-195	Probable rRNA-processing protein EBP2 homolog OS=Arabidopsis thaliana OX=3702 GN=EBP2 PE=1 SV=1	1.59e-112	Ebp2
PB.57.3	ko:K14823	GO:0003674,GO:0003676,GO:0003723,GO:0003824,GO:0003924,GO:0005488,GO:0005575,GO:0005622,GO:0005623,GO:0005634,GO:0005730,GO:0006139,GO:0006364,GO:0006396,GO:0006725,GO:0006807,GO:0008150,GO:0008152,GO:0009987,GO:0010467,GO:0016070,GO:0016072,GO:0016462,GO:0016787,GO:0016817,GO:0016818,GO:0017111,GO:0022613,GO:0030684,GO:0030687,GO:0031974,GO:0031981,GO:0032991,GO:0034399,GO:0034470,GO:0034641,GO:…	PREDICTED: Solanum tuberosum probable rRNA-processing protein EBP2 homolog (LOC102583550), transcript variant X2, mRNA	0	hypothetical protein KY289_000117	0	#N/A	#N/A	Nucleolar protein-like/EBNA1-binding protein	3.25e-22	KOG3080@1|root,KOG3080@2759|Eukaryota,37NRF@33090|Viridiplantae,3GCFQ@35493|Streptophyta,44C5P@71274|asterids	5.45e-195	Probable rRNA-processing protein EBP2 homolog OS=Arabidopsis thaliana OX=3702 GN=EBP2 PE=1 SV=1	1.59e-112	Ebp2
PB.57.4	ko:K14823	GO:0003674,GO:0003676,GO:0003723,GO:0003824,GO:0003924,GO:0005488,GO:0005575,GO:0005622,GO:0005623,GO:0005634,GO:0005730,GO:0006139,GO:0006364,GO:0006396,GO:0006725,GO:0006807,GO:0008150,GO:0008152,GO:0009987,GO:0010467,GO:0016070,GO:0016072,GO:0016462,GO:0016787,GO:0016817,GO:0016818,GO:0017111,GO:0022613,GO:0030684,GO:0030687,GO:0031974,GO:0031981,GO:0032991,GO:0034399,GO:0034470,GO:0034641,GO:…	PREDICTED: Solanum tuberosum probable rRNA-processing protein EBP2 homolog (LOC102583550), transcript variant X2, mRNA	0	hypothetical protein KY289_000117	0	#N/A	#N/A	Nucleolar protein-like/EBNA1-binding protein	3.25e-22	KOG3080@1|root,KOG3080@2759|Eukaryota,37NRF@33090|Viridiplantae,3GCFQ@35493|Streptophyta,44C5P@71274|asterids	5.45e-195	Probable rRNA-processing protein EBP2 homolog OS=Arabidopsis thaliana OX=3702 GN=EBP2 PE=1 SV=1	1.59e-112	Ebp2
PB.57.5	ko:K14823	GO:0003674,GO:0003676,GO:0003723,GO:0003824,GO:0003924,GO:0005488,GO:0005575,GO:0005622,GO:0005623,GO:0005634,GO:0005730,GO:0006139,GO:0006364,GO:0006396,GO:0006725,GO:0006807,GO:0008150,GO:0008152,GO:0009987,GO:0010467,GO:0016070,GO:0016072,GO:0016462,GO:0016787,GO:0016817,GO:0016818,GO:0017111,GO:0022613,GO:0030684,GO:0030687,GO:0031974,GO:0031981,GO:0032991,GO:0034399,GO:0034470,GO:0034641,GO:…	PREDICTED: Solanum tuberosum probable rRNA-processing protein EBP2 homolog (LOC102583550), transcript variant X2, mRNA	0	hypothetical protein KY289_000117	0	#N/A	#N/A	Nucleolar protein-like/EBNA1-binding protein	3.25e-22	KOG3080@1|root,KOG3080@2759|Eukaryota,37NRF@33090|Viridiplantae,3GCFQ@35493|Streptophyta,44C5P@71274|asterids	5.45e-195	Probable rRNA-processing protein EBP2 homolog OS=Arabidopsis thaliana OX=3702 GN=EBP2 PE=1 SV=1	1.59e-112	Ebp2
PB.58.1	-	GO:0003674,GO:0003824,GO:0003924,GO:0006275,GO:0008150,GO:0008156,GO:0009889,GO:0009890,GO:0009892,GO:0010556,GO:0010558,GO:0010605,GO:0016462,GO:0016787,GO:0016817,GO:0016818,GO:0017111,GO:0019219,GO:0019222,GO:0022613,GO:0030174,GO:0031323,GO:0031324,GO:0031326,GO:0031327,GO:0032297,GO:0042254,GO:0044085,GO:0045934,GO:0048519,GO:0048523,GO:0050789,GO:0050794,GO:0051052,GO:0051053,GO:0051171,GO:…	PREDICTED: Solanum tuberosum uncharacterized protein YqeH (LOC102583878), mRNA	0	hypothetical protein H5410_000224	0	GTP-binding protein YqeH [Streptococcus pyogenes M1 GAS]	6.5e-46	Predicted GTPases	1.26e-09	COG1161@1|root,KOG1249@2759|Eukaryota,37HS9@33090|Viridiplantae,3G7IX@35493|Streptophyta,44IYQ@71274|asterids	0.0	GTP-binding protein BRASSINAZOLE INSENSITIVE PALE GREEN 2, chloroplastic OS=Arabidopsis thaliana OX=3702 GN=BPG2 PE=1 SV=1	2.87e-144	MMR_HSR1
PB.59.1	-	GO:0003674,GO:0003824,GO:0005575,GO:0005622,GO:0005623,GO:0005737,GO:0006091,GO:0006996,GO:0007275,GO:0008150,GO:0008152,GO:0009507,GO:0009534,GO:0009535,GO:0009536,GO:0009553,GO:0009561,GO:0009579,GO:0009657,GO:0009668,GO:0009987,GO:0010027,GO:0015036,GO:0015979,GO:0016020,GO:0016043,GO:0016491,GO:0016651,GO:0016667,GO:0016668,GO:0019684,GO:0022607,GO:0031976,GO:0031977,GO:0031984,GO:0032501,GO:…	PREDICTED: Solanum tuberosum protein EMBRYO SAC DEVELOPMENT ARREST 3, chloroplastic (LOC102581658), mRNA	1.95e-178	hypothetical protein H5410_000219	2.85e-76	#N/A	#N/A	#N/A	#N/A	2CXUU@1|root,2RZYB@2759|Eukaryota,37UNU@33090|Viridiplantae,3GIY5@35493|Streptophyta,44JNR@71274|asterids	1.05e-77	Protein PHOTOSYSTEM I ASSEMBLY 2, chloroplastic OS=Oryza sativa subsp. japonica OX=39947 GN=PSA2 PE=2 SV=1	1.74e-08	#N/A
PB.59.2	-	GO:0003674,GO:0003824,GO:0005575,GO:0005622,GO:0005623,GO:0005737,GO:0006091,GO:0006996,GO:0007275,GO:0008150,GO:0008152,GO:0009507,GO:0009534,GO:0009535,GO:0009536,GO:0009553,GO:0009561,GO:0009579,GO:0009657,GO:0009668,GO:0009987,GO:0010027,GO:0015036,GO:0015979,GO:0016020,GO:0016043,GO:0016491,GO:0016651,GO:0016667,GO:0016668,GO:0019684,GO:0022607,GO:0031976,GO:0031977,GO:0031984,GO:0032501,GO:…	PREDICTED: Solanum tuberosum protein EMBRYO SAC DEVELOPMENT ARREST 3, chloroplastic (LOC102581658), mRNA	0	hypothetical protein H5410_000219	1.12e-135	#N/A	#N/A	#N/A	#N/A	2CXUU@1|root,2RZYB@2759|Eukaryota,37UNU@33090|Viridiplantae,3GIY5@35493|Streptophyta,44JNR@71274|asterids	1.51e-118	Protein PHOTOSYSTEM I ASSEMBLY 2, chloroplastic OS=Arabidopsis thaliana OX=3702 GN=PSA2 PE=1 SV=1	7.05e-65	DnaJ_CXXCXGXG
PB.59.3	-	GO:0003674,GO:0003824,GO:0005575,GO:0005622,GO:0005623,GO:0005737,GO:0006091,GO:0006996,GO:0007275,GO:0008150,GO:0008152,GO:0009507,GO:0009534,GO:0009535,GO:0009536,GO:0009553,GO:0009561,GO:0009579,GO:0009657,GO:0009668,GO:0009987,GO:0010027,GO:0015036,GO:0015979,GO:0016020,GO:0016043,GO:0016491,GO:0016651,GO:0016667,GO:0016668,GO:0019684,GO:0022607,GO:0031976,GO:0031977,GO:0031984,GO:0032501,GO:…	PREDICTED: Solanum tuberosum protein EMBRYO SAC DEVELOPMENT ARREST 3, chloroplastic (LOC102581658), mRNA	0	hypothetical protein H5410_000219	1.12e-135	#N/A	#N/A	#N/A	#N/A	2CXUU@1|root,2RZYB@2759|Eukaryota,37UNU@33090|Viridiplantae,3GIY5@35493|Streptophyta,44JNR@71274|asterids	1.51e-118	Protein PHOTOSYSTEM I ASSEMBLY 2, chloroplastic OS=Arabidopsis thaliana OX=3702 GN=PSA2 PE=1 SV=1	7.05e-65	DnaJ_CXXCXGXG
PB.59.4	-	GO:0003674,GO:0003824,GO:0005575,GO:0005622,GO:0005623,GO:0005737,GO:0006091,GO:0006996,GO:0007275,GO:0008150,GO:0008152,GO:0009507,GO:0009534,GO:0009535,GO:0009536,GO:0009553,GO:0009561,GO:0009579,GO:0009657,GO:0009668,GO:0009987,GO:0010027,GO:0015036,GO:0015979,GO:0016020,GO:0016043,GO:0016491,GO:0016651,GO:0016667,GO:0016668,GO:0019684,GO:0022607,GO:0031976,GO:0031977,GO:0031984,GO:0032501,GO:…	PREDICTED: Solanum tuberosum protein EMBRYO SAC DEVELOPMENT ARREST 3, chloroplastic (LOC102581658), mRNA	6.19e-178	hypothetical protein H5410_000219	1.33e-75	#N/A	#N/A	#N/A	#N/A	2CXUU@1|root,2RZYB@2759|Eukaryota,37UNU@33090|Viridiplantae,3GIY5@35493|Streptophyta,44JNR@71274|asterids	6.9e-77	Protein PHOTOSYSTEM I ASSEMBLY 2, chloroplastic OS=Oryza sativa subsp. japonica OX=39947 GN=PSA2 PE=2 SV=1	9.83e-08	#N/A
PB.59.5	-	GO:0003674,GO:0003824,GO:0005575,GO:0005622,GO:0005623,GO:0005737,GO:0006091,GO:0006996,GO:0007275,GO:0008150,GO:0008152,GO:0009507,GO:0009534,GO:0009535,GO:0009536,GO:0009553,GO:0009561,GO:0009579,GO:0009657,GO:0009668,GO:0009987,GO:0010027,GO:0015036,GO:0015979,GO:0016020,GO:0016043,GO:0016491,GO:0016651,GO:0016667,GO:0016668,GO:0019684,GO:0022607,GO:0031976,GO:0031977,GO:0031984,GO:0032501,GO:…	PREDICTED: Solanum tuberosum protein EMBRYO SAC DEVELOPMENT ARREST 3, chloroplastic (LOC102581658), mRNA	0	hypothetical protein H5410_000219	1.12e-135	#N/A	#N/A	#N/A	#N/A	2CXUU@1|root,2RZYB@2759|Eukaryota,37UNU@33090|Viridiplantae,3GIY5@35493|Streptophyta,44JNR@71274|asterids	1.51e-118	Protein PHOTOSYSTEM I ASSEMBLY 2, chloroplastic OS=Arabidopsis thaliana OX=3702 GN=PSA2 PE=1 SV=1	7.05e-65	DnaJ_CXXCXGXG
PB.59.6	-	GO:0003674,GO:0003824,GO:0005575,GO:0005622,GO:0005623,GO:0005737,GO:0006091,GO:0006996,GO:0007275,GO:0008150,GO:0008152,GO:0009507,GO:0009534,GO:0009535,GO:0009536,GO:0009553,GO:0009561,GO:0009579,GO:0009657,GO:0009668,GO:0009987,GO:0010027,GO:0015036,GO:0015979,GO:0016020,GO:0016043,GO:0016491,GO:0016651,GO:0016667,GO:0016668,GO:0019684,GO:0022607,GO:0031976,GO:0031977,GO:0031984,GO:0032501,GO:…	PREDICTED: Solanum tuberosum protein EMBRYO SAC DEVELOPMENT ARREST 3, chloroplastic (LOC102581658), mRNA	0	hypothetical protein H5410_000219	4.99e-114	#N/A	#N/A	#N/A	#N/A	2CXUU@1|root,2RZYB@2759|Eukaryota,37UNU@33090|Viridiplantae,3GIY5@35493|Streptophyta,44JNR@71274|asterids	1.1e-97	Protein PHOTOSYSTEM I ASSEMBLY 2, chloroplastic OS=Arabidopsis thaliana OX=3702 GN=PSA2 PE=1 SV=1	5.44e-65	DnaJ_CXXCXGXG
PB.59.7	#N/A	#N/A	#N/A	#N/A	#N/A	#N/A	#N/A	#N/A	#N/A	#N/A	#N/A	#N/A	#N/A	#N/A	#N/A
PB.60.1	ko:K04506	GO:0003674,GO:0003824,GO:0004842,GO:0005488,GO:0005515,GO:0005575,GO:0005622,GO:0005623,GO:0005634,GO:0005737,GO:0006464,GO:0006807,GO:0008150,GO:0008152,GO:0009894,GO:0009987,GO:0010506,GO:0016241,GO:0016567,GO:0016740,GO:0019222,GO:0019538,GO:0019787,GO:0031323,GO:0031329,GO:0032446,GO:0033043,GO:0036211,GO:0042802,GO:0042803,GO:0043170,GO:0043226,GO:0043227,GO:0043229,GO:0043231,GO:0043412,GO:…	PREDICTED: Solanum tuberosum E3 ubiquitin-protein ligase SINAT2-like (LOC102584192), transcript variant X4, mRNA	0	hypothetical protein H5410_000225	0	#N/A	#N/A	Zn finger protein	4.66e-150	KOG3002@1|root,KOG3002@2759|Eukaryota,37ITI@33090|Viridiplantae,3GERR@35493|Streptophyta,44N58@71274|asterids	2.07e-240	E3 ubiquitin-protein ligase SINAT2 OS=Arabidopsis thaliana OX=3702 GN=SINAT2 PE=1 SV=1	2.87e-170	Sina
PB.60.2	ko:K04506	GO:0003674,GO:0003824,GO:0004842,GO:0005488,GO:0005515,GO:0005575,GO:0005622,GO:0005623,GO:0005634,GO:0005737,GO:0006464,GO:0006807,GO:0008150,GO:0008152,GO:0009894,GO:0009987,GO:0010506,GO:0016241,GO:0016567,GO:0016740,GO:0019222,GO:0019538,GO:0019787,GO:0031323,GO:0031329,GO:0032446,GO:0033043,GO:0036211,GO:0042802,GO:0042803,GO:0043170,GO:0043226,GO:0043227,GO:0043229,GO:0043231,GO:0043412,GO:…	PREDICTED: Solanum tuberosum E3 ubiquitin-protein ligase SINAT2-like (LOC102584192), transcript variant X4, mRNA	0	hypothetical protein H5410_000225	0	#N/A	#N/A	Zn finger protein	4.61e-150	KOG3002@1|root,KOG3002@2759|Eukaryota,37ITI@33090|Viridiplantae,3GERR@35493|Streptophyta,44N58@71274|asterids	1.86e-240	E3 ubiquitin-protein ligase SINAT2 OS=Arabidopsis thaliana OX=3702 GN=SINAT2 PE=1 SV=1	1.8e-170	Sina
PB.60.3	ko:K04506	GO:0003674,GO:0003824,GO:0004842,GO:0005488,GO:0005515,GO:0005575,GO:0005622,GO:0005623,GO:0005634,GO:0005737,GO:0006464,GO:0006807,GO:0008150,GO:0008152,GO:0009894,GO:0009987,GO:0010506,GO:0016241,GO:0016567,GO:0016740,GO:0019222,GO:0019538,GO:0019787,GO:0031323,GO:0031329,GO:0032446,GO:0033043,GO:0036211,GO:0042802,GO:0042803,GO:0043170,GO:0043226,GO:0043227,GO:0043229,GO:0043231,GO:0043412,GO:…	PREDICTED: Solanum tuberosum E3 ubiquitin-protein ligase SINAT2-like (LOC102584192), transcript variant X4, mRNA	0	hypothetical protein H5410_000225	0	#N/A	#N/A	Zn finger protein	4.66e-150	KOG3002@1|root,KOG3002@2759|Eukaryota,37ITI@33090|Viridiplantae,3GERR@35493|Streptophyta,44N58@71274|asterids	2.07e-240	E3 ubiquitin-protein ligase SINAT2 OS=Arabidopsis thaliana OX=3702 GN=SINAT2 PE=1 SV=1	2.87e-170	Sina
PB.60.4	ko:K04506	GO:0003674,GO:0003824,GO:0004842,GO:0005488,GO:0005515,GO:0005575,GO:0005622,GO:0005623,GO:0005634,GO:0005737,GO:0006464,GO:0006807,GO:0008150,GO:0008152,GO:0009894,GO:0009987,GO:0010506,GO:0016241,GO:0016567,GO:0016740,GO:0019222,GO:0019538,GO:0019787,GO:0031323,GO:0031329,GO:0032446,GO:0033043,GO:0036211,GO:0042802,GO:0042803,GO:0043170,GO:0043226,GO:0043227,GO:0043229,GO:0043231,GO:0043412,GO:…	PREDICTED: Solanum tuberosum E3 ubiquitin-protein ligase SINAT2-like (LOC102584192), transcript variant X4, mRNA	0	hypothetical protein H5410_000225	0	#N/A	#N/A	Zn finger protein	4.66e-150	KOG3002@1|root,KOG3002@2759|Eukaryota,37ITI@33090|Viridiplantae,3GERR@35493|Streptophyta,44N58@71274|asterids	2.07e-240	E3 ubiquitin-protein ligase SINAT2 OS=Arabidopsis thaliana OX=3702 GN=SINAT2 PE=1 SV=1	2.87e-170	Sina
PB.61.1	#N/A	#N/A	Solanum pinnatisectum cultivar CGN17745 chromosome 1	4.22e-120	hypothetical protein H5410_000226	4.4e-58	#N/A	#N/A	#N/A	#N/A	#N/A	#N/A	#N/A	#N/A	#N/A
PB.61.2	#N/A	#N/A	Solanum pinnatisectum cultivar CGN17745 chromosome 1	1.79e-108	hypothetical protein H5410_000226	4.52e-58	#N/A	#N/A	#N/A	#N/A	#N/A	#N/A	#N/A	#N/A	#N/A
PB.62.1	-	-	PREDICTED: Solanum tuberosum non-structural maintenance of chromosomes element 1 homolog (LOC102585398), mRNA	0	hypothetical protein KY290_000123	0	#N/A	#N/A	#N/A	#N/A	KOG4718@1|root,KOG4718@2759|Eukaryota,37HHI@33090|Viridiplantae,3GEPM@35493|Streptophyta,44IMP@71274|asterids	4.41e-220	Non-structural maintenance of chromosomes element 1 homolog OS=Homo sapiens OX=9606 GN=NSMCE1 PE=1 SV=5	1.79e-18	SMC_Nse1 & zf-RING-like
PB.63.1	ko:K08342	GO:0000045,GO:0000422,GO:0003674,GO:0003824,GO:0004175,GO:0004197,GO:0005575,GO:0005622,GO:0005623,GO:0005737,GO:0005829,GO:0006464,GO:0006497,GO:0006501,GO:0006508,GO:0006605,GO:0006612,GO:0006807,GO:0006810,GO:0006886,GO:0006914,GO:0006996,GO:0007005,GO:0007033,GO:0008104,GO:0008150,GO:0008152,GO:0008233,GO:0008234,GO:0009056,GO:0009058,GO:0009059,GO:0009987,GO:0015031,GO:0015833,GO:0016043,GO:…	PREDICTED: Solanum tuberosum cysteine protease ATG4-like (LOC102586842), transcript variant X1, mRNA	0	hypothetical protein H5410_000229	0	#N/A	#N/A	Cysteine protease required for autophagy - Apg4p/Aut2p	1.56e-54	KOG2674@1|root,KOG2674@2759|Eukaryota,37R3P@33090|Viridiplantae,3G7HT@35493|Streptophyta,44FEG@71274|asterids	0.0	Cysteine protease ATG4 OS=Medicago truncatula OX=3880 GN=ATG4 PE=3 SV=1	5.15e-173	Peptidase_C54
PB.63.2	ko:K08342	GO:0000045,GO:0000422,GO:0003674,GO:0003824,GO:0004175,GO:0004197,GO:0005575,GO:0005622,GO:0005623,GO:0005737,GO:0005829,GO:0006464,GO:0006497,GO:0006501,GO:0006508,GO:0006605,GO:0006612,GO:0006807,GO:0006810,GO:0006886,GO:0006914,GO:0006996,GO:0007005,GO:0007033,GO:0008104,GO:0008150,GO:0008152,GO:0008233,GO:0008234,GO:0009056,GO:0009058,GO:0009059,GO:0009987,GO:0015031,GO:0015833,GO:0016043,GO:…	PREDICTED: Solanum tuberosum cysteine protease ATG4-like (LOC102586842), transcript variant X1, mRNA	0	hypothetical protein H5410_000229	0	#N/A	#N/A	Cysteine protease required for autophagy - Apg4p/Aut2p	1.56e-54	KOG2674@1|root,KOG2674@2759|Eukaryota,37R3P@33090|Viridiplantae,3G7HT@35493|Streptophyta,44FEG@71274|asterids	0.0	Cysteine protease ATG4 OS=Medicago truncatula OX=3880 GN=ATG4 PE=3 SV=1	5.15e-173	Peptidase_C54
PB.63.3	ko:K08342	GO:0000045,GO:0000422,GO:0003674,GO:0003824,GO:0004175,GO:0004197,GO:0005575,GO:0005622,GO:0005623,GO:0005737,GO:0005829,GO:0006464,GO:0006497,GO:0006501,GO:0006508,GO:0006605,GO:0006612,GO:0006807,GO:0006810,GO:0006886,GO:0006914,GO:0006996,GO:0007005,GO:0007033,GO:0008104,GO:0008150,GO:0008152,GO:0008233,GO:0008234,GO:0009056,GO:0009058,GO:0009059,GO:0009987,GO:0015031,GO:0015833,GO:0016043,GO:…	PREDICTED: Solanum tuberosum cysteine protease ATG4-like (LOC102586842), transcript variant X2, mRNA	0	PREDICTED: cysteine protease ATG4-like isoform X2	0	#N/A	#N/A	Cysteine protease required for autophagy - Apg4p/Aut2p	3.12e-59	KOG2674@1|root,KOG2674@2759|Eukaryota,37R3P@33090|Viridiplantae,3G7HT@35493|Streptophyta,44FEG@71274|asterids	0.0	Cysteine protease ATG4 OS=Medicago truncatula OX=3880 GN=ATG4 PE=3 SV=1	8.15e-179	Peptidase_C54
PB.63.4	ko:K08342	GO:0000045,GO:0000422,GO:0003674,GO:0003824,GO:0004175,GO:0004197,GO:0005575,GO:0005622,GO:0005623,GO:0005737,GO:0005829,GO:0006464,GO:0006497,GO:0006501,GO:0006508,GO:0006605,GO:0006612,GO:0006807,GO:0006810,GO:0006886,GO:0006914,GO:0006996,GO:0007005,GO:0007033,GO:0008104,GO:0008150,GO:0008152,GO:0008233,GO:0008234,GO:0009056,GO:0009058,GO:0009059,GO:0009987,GO:0015031,GO:0015833,GO:0016043,GO:…	PREDICTED: Solanum tuberosum cysteine protease ATG4-like (LOC102586842), transcript variant X2, mRNA	0	PREDICTED: cysteine protease ATG4-like isoform X2	0	#N/A	#N/A	Cysteine protease required for autophagy - Apg4p/Aut2p	3.29e-59	KOG2674@1|root,KOG2674@2759|Eukaryota,37R3P@33090|Viridiplantae,3G7HT@35493|Streptophyta,44FEG@71274|asterids	0.0	Cysteine protease ATG4 OS=Medicago truncatula OX=3880 GN=ATG4 PE=3 SV=1	6.55e-179	Peptidase_C54
PB.63.5	ko:K08342	GO:0000045,GO:0000422,GO:0003674,GO:0003824,GO:0004175,GO:0004197,GO:0005575,GO:0005622,GO:0005623,GO:0005737,GO:0005829,GO:0006464,GO:0006497,GO:0006501,GO:0006508,GO:0006605,GO:0006612,GO:0006807,GO:0006810,GO:0006886,GO:0006914,GO:0006996,GO:0007005,GO:0007033,GO:0008104,GO:0008150,GO:0008152,GO:0008233,GO:0008234,GO:0009056,GO:0009058,GO:0009059,GO:0009987,GO:0015031,GO:0015833,GO:0016043,GO:…	PREDICTED: Solanum tuberosum cysteine protease ATG4-like (LOC102586842), transcript variant X2, mRNA	0	hypothetical protein KY289_000121	0	#N/A	#N/A	Cysteine protease required for autophagy - Apg4p/Aut2p	2.77e-40	KOG2674@1|root,KOG2674@2759|Eukaryota,37R3P@33090|Viridiplantae,3G7HT@35493|Streptophyta,44FEG@71274|asterids	1.49e-215	Cysteine protease ATG4 OS=Medicago truncatula OX=3880 GN=ATG4 PE=3 SV=1	1.9e-134	Peptidase_C54
PB.64.1	#N/A	#N/A	#N/A	#N/A	#N/A	#N/A	#N/A	#N/A	#N/A	#N/A	#N/A	#N/A	#N/A	#N/A	#N/A
PB.64.2	#N/A	#N/A	#N/A	#N/A	#N/A	#N/A	#N/A	#N/A	#N/A	#N/A	#N/A	#N/A	#N/A	#N/A	#N/A
PB.64.3	-	-	PREDICTED: Solanum tuberosum agglutinin alpha chain-like (LOC102586302), transcript variant X2, mRNA	0	hypothetical protein H5410_000230	1.78e-125	#N/A	#N/A	0	1.08e-09	2E1RS@1|root,2R7MA@2759|Eukaryota,387YS@33090|Viridiplantae,3GW1K@35493|Streptophyta,44QVP@71274|asterids	7.54e-120	Inactive protein RESTRICTED TEV MOVEMENT 1 OS=Arabidopsis thaliana OX=3702 GN=RTM1 PE=3 SV=1	2.64e-15	Jacalin
PB.64.4	-	-	PREDICTED: Solanum tuberosum agglutinin alpha chain-like (LOC107057759), transcript variant X2, mRNA	4.63e-154	hypothetical protein H5410_000231	1.42e-70	#N/A	#N/A	0	7.89e-07	2E1RS@1|root,2R7MA@2759|Eukaryota,387YS@33090|Viridiplantae,3GW1K@35493|Streptophyta,44QVP@71274|asterids	2.04e-70	Inactive protein RESTRICTED TEV MOVEMENT 1 OS=Arabidopsis thaliana OX=3702 GN=RTM1 PE=3 SV=1	1.29e-07	Jacalin
PB.65.1	ko:K01938	GO:0003674,GO:0003824,GO:0004329,GO:0004477,GO:0004488,GO:0005488,GO:0005507,GO:0005575,GO:0005576,GO:0005622,GO:0005623,GO:0005737,GO:0005829,GO:0005886,GO:0006082,GO:0006139,GO:0006144,GO:0006575,GO:0006725,GO:0006732,GO:0006760,GO:0006807,GO:0008150,GO:0008152,GO:0009058,GO:0009108,GO:0009112,GO:0009113,GO:0009256,GO:0009257,GO:0009396,GO:0009507,GO:0009536,GO:0009719,GO:0009725,GO:0009735,GO:…	PREDICTED: Solanum tuberosum formate--tetrahydrofolate ligase (LOC102587729), mRNA	0	hypothetical protein H5410_000234	0	formate--tetrahydrofolate ligase [Caldilinea aerophila DSM 14535 = NBRC 104270]	0	#N/A	#N/A	COG2759@1|root,2QSVW@2759|Eukaryota,37RBI@33090|Viridiplantae,3G7W8@35493|Streptophyta,44GKI@71274|asterids	0.0	Formate--tetrahydrofolate ligase OS=Arabidopsis thaliana OX=3702 GN=THFS PE=2 SV=1	0	FTHFS
PB.65.2	ko:K01938	GO:0003674,GO:0003824,GO:0004329,GO:0004477,GO:0004488,GO:0005488,GO:0005507,GO:0005575,GO:0005576,GO:0005622,GO:0005623,GO:0005737,GO:0005829,GO:0005886,GO:0006082,GO:0006139,GO:0006144,GO:0006575,GO:0006725,GO:0006732,GO:0006760,GO:0006807,GO:0008150,GO:0008152,GO:0009058,GO:0009108,GO:0009112,GO:0009113,GO:0009256,GO:0009257,GO:0009396,GO:0009507,GO:0009536,GO:0009719,GO:0009725,GO:0009735,GO:…	PREDICTED: Solanum tuberosum formate--tetrahydrofolate ligase (LOC102587729), mRNA	0	hypothetical protein H5410_000234	0	formate--tetrahydrofolate ligase [Caldilinea aerophila DSM 14535 = NBRC 104270]	0	#N/A	#N/A	COG2759@1|root,2QSVW@2759|Eukaryota,37RBI@33090|Viridiplantae,3G7W8@35493|Streptophyta,44GKI@71274|asterids	0.0	Formate--tetrahydrofolate ligase OS=Arabidopsis thaliana OX=3702 GN=THFS PE=2 SV=1	0	FTHFS
PB.65.3	ko:K01938	GO:0003674,GO:0003824,GO:0004329,GO:0004477,GO:0004488,GO:0005488,GO:0005507,GO:0005575,GO:0005576,GO:0005622,GO:0005623,GO:0005737,GO:0005829,GO:0005886,GO:0006082,GO:0006139,GO:0006144,GO:0006575,GO:0006725,GO:0006732,GO:0006760,GO:0006807,GO:0008150,GO:0008152,GO:0009058,GO:0009108,GO:0009112,GO:0009113,GO:0009256,GO:0009257,GO:0009396,GO:0009507,GO:0009536,GO:0009719,GO:0009725,GO:0009735,GO:…	PREDICTED: Solanum tuberosum formate--tetrahydrofolate ligase (LOC102587729), mRNA	0	hypothetical protein H5410_000234	0	formate--tetrahydrofolate ligase [Caldilinea aerophila DSM 14535 = NBRC 104270]	0	#N/A	#N/A	COG2759@1|root,2QSVW@2759|Eukaryota,37RBI@33090|Viridiplantae,3G7W8@35493|Streptophyta,44GKI@71274|asterids	0.0	Formate--tetrahydrofolate ligase OS=Arabidopsis thaliana OX=3702 GN=THFS PE=2 SV=1	0	FTHFS
PB.65.4	ko:K01938	GO:0003674,GO:0003824,GO:0004329,GO:0004477,GO:0004488,GO:0005488,GO:0005507,GO:0005575,GO:0005576,GO:0005622,GO:0005623,GO:0005737,GO:0005829,GO:0005886,GO:0006082,GO:0006139,GO:0006144,GO:0006575,GO:0006725,GO:0006732,GO:0006760,GO:0006807,GO:0008150,GO:0008152,GO:0009058,GO:0009108,GO:0009112,GO:0009113,GO:0009256,GO:0009257,GO:0009396,GO:0009507,GO:0009536,GO:0009719,GO:0009725,GO:0009735,GO:…	PREDICTED: Solanum tuberosum formate--tetrahydrofolate ligase (LOC102587729), mRNA	0	hypothetical protein KY284_003836	0	formate--tetrahydrofolate ligase [Caldilinea aerophila DSM 14535 = NBRC 104270]	0	0	1.32e-113	COG2759@1|root,2QSVW@2759|Eukaryota,37RBI@33090|Viridiplantae,3G7W8@35493|Streptophyta,44GKI@71274|asterids	0.0	Formate--tetrahydrofolate ligase OS=Arabidopsis thaliana OX=3702 GN=THFS PE=2 SV=1	0	FTHFS & peroxidase
PB.65.5	ko:K01938	GO:0003674,GO:0003824,GO:0004329,GO:0004477,GO:0004488,GO:0005488,GO:0005507,GO:0005575,GO:0005576,GO:0005622,GO:0005623,GO:0005737,GO:0005829,GO:0005886,GO:0006082,GO:0006139,GO:0006144,GO:0006575,GO:0006725,GO:0006732,GO:0006760,GO:0006807,GO:0008150,GO:0008152,GO:0009058,GO:0009108,GO:0009112,GO:0009113,GO:0009256,GO:0009257,GO:0009396,GO:0009507,GO:0009536,GO:0009719,GO:0009725,GO:0009735,GO:…	PREDICTED: Solanum tuberosum formate--tetrahydrofolate ligase (LOC102587729), mRNA	0	hypothetical protein H5410_000234	0	formate--tetrahydrofolate ligase [Caldilinea aerophila DSM 14535 = NBRC 104270]	0	#N/A	#N/A	COG2759@1|root,2QSVW@2759|Eukaryota,37RBI@33090|Viridiplantae,3G7W8@35493|Streptophyta,44GKI@71274|asterids	0.0	Formate--tetrahydrofolate ligase OS=Spinacia oleracea OX=3562 PE=1 SV=3	0	FTHFS
PB.65.6	ko:K01938	GO:0003674,GO:0003824,GO:0004329,GO:0004477,GO:0004488,GO:0005488,GO:0005507,GO:0005575,GO:0005576,GO:0005622,GO:0005623,GO:0005737,GO:0005829,GO:0005886,GO:0006082,GO:0006139,GO:0006144,GO:0006575,GO:0006725,GO:0006732,GO:0006760,GO:0006807,GO:0008150,GO:0008152,GO:0009058,GO:0009108,GO:0009112,GO:0009113,GO:0009256,GO:0009257,GO:0009396,GO:0009507,GO:0009536,GO:0009719,GO:0009725,GO:0009735,GO:…	PREDICTED: Solanum tuberosum formate--tetrahydrofolate ligase (LOC102587729), mRNA	0	hypothetical protein KY289_004002	0	formate--tetrahydrofolate ligase [Caldilinea aerophila DSM 14535 = NBRC 104270]	2.63e-115	#N/A	#N/A	COG2759@1|root,2QSVW@2759|Eukaryota,37RBI@33090|Viridiplantae,3G7W8@35493|Streptophyta,44GKI@71274|asterids	1.09e-187	Formate--tetrahydrofolate ligase OS=Spinacia oleracea OX=3562 PE=1 SV=3	1.24e-174	FTHFS
PB.65.7	ko:K01938	GO:0003674,GO:0003824,GO:0004329,GO:0004477,GO:0004488,GO:0005488,GO:0005507,GO:0005575,GO:0005576,GO:0005622,GO:0005623,GO:0005737,GO:0005829,GO:0005886,GO:0006082,GO:0006139,GO:0006144,GO:0006575,GO:0006725,GO:0006732,GO:0006760,GO:0006807,GO:0008150,GO:0008152,GO:0009058,GO:0009108,GO:0009112,GO:0009113,GO:0009256,GO:0009257,GO:0009396,GO:0009507,GO:0009536,GO:0009719,GO:0009725,GO:0009735,GO:…	PREDICTED: Solanum tuberosum formate--tetrahydrofolate ligase (LOC102587729), mRNA	0	PREDICTED: formate--tetrahydrofolate ligase	0	formate--tetrahydrofolate ligase [Caldilinea aerophila DSM 14535 = NBRC 104270]	3.43e-175	#N/A	#N/A	COG2759@1|root,2QSVW@2759|Eukaryota,37RBI@33090|Viridiplantae,3G7W8@35493|Streptophyta,44GKI@71274|asterids	4.36e-260	Formate--tetrahydrofolate ligase OS=Spinacia oleracea OX=3562 PE=1 SV=3	0	FTHFS
PB.65.8	ko:K01938	GO:0003674,GO:0003824,GO:0004329,GO:0004477,GO:0004488,GO:0005488,GO:0005507,GO:0005575,GO:0005576,GO:0005622,GO:0005623,GO:0005737,GO:0005829,GO:0005886,GO:0006082,GO:0006139,GO:0006144,GO:0006575,GO:0006725,GO:0006732,GO:0006760,GO:0006807,GO:0008150,GO:0008152,GO:0009058,GO:0009108,GO:0009112,GO:0009113,GO:0009256,GO:0009257,GO:0009396,GO:0009507,GO:0009536,GO:0009719,GO:0009725,GO:0009735,GO:…	PREDICTED: Solanum tuberosum formate--tetrahydrofolate ligase (LOC102587729), mRNA	0	PREDICTED: formate--tetrahydrofolate ligase-like, partial	3.9e-92	formate--tetrahydrofolate ligase [Anaerolinea thermophila UNI-1]	2.54e-53	#N/A	#N/A	COG2759@1|root,2QSVW@2759|Eukaryota,37RBI@33090|Viridiplantae,3G7W8@35493|Streptophyta,44GKI@71274|asterids	1.22e-91	Formate--tetrahydrofolate ligase OS=Arabidopsis thaliana OX=3702 GN=THFS PE=2 SV=1	5.7e-85	FTHFS
PB.65.9	#N/A	#N/A	#N/A	#N/A	#N/A	#N/A	#N/A	#N/A	#N/A	#N/A	#N/A	#N/A	#N/A	#N/A	#N/A
PB.65.10	ko:K00430	-	PREDICTED: Solanum tuberosum lignin-forming anionic peroxidase-like (LOC102588050), mRNA	0	hypothetical protein H5410_000235	6.27e-90	#N/A	#N/A	0	1.93e-45	2C0PQ@1|root,2QVXS@2759|Eukaryota,37PB0@33090|Viridiplantae,3G9EZ@35493|Streptophyta,44R00@71274|asterids	1.21e-83	Lignin-forming anionic peroxidase OS=Nicotiana tabacum OX=4097 PE=2 SV=1	4.35e-65	peroxidase
PB.65.11	ko:K00430	-	PREDICTED: Solanum tuberosum lignin-forming anionic peroxidase-like (LOC102588050), mRNA	0	hypothetical protein H5410_000235	0	#N/A	#N/A	0	6.42e-146	2C0PQ@1|root,2QVXS@2759|Eukaryota,37PB0@33090|Viridiplantae,3G9EZ@35493|Streptophyta,44R00@71274|asterids	3.68e-230	Lignin-forming anionic peroxidase OS=Nicotiana tabacum OX=4097 PE=2 SV=1	0	peroxidase
PB.65.12	ko:K00430	-	PREDICTED: Solanum tuberosum lignin-forming anionic peroxidase-like (LOC102588050), mRNA	0	hypothetical protein H5410_000235	0	#N/A	#N/A	0	6.42e-146	2C0PQ@1|root,2QVXS@2759|Eukaryota,37PB0@33090|Viridiplantae,3G9EZ@35493|Streptophyta,44R00@71274|asterids	3.68e-230	Lignin-forming anionic peroxidase OS=Nicotiana tabacum OX=4097 PE=2 SV=1	0	peroxidase
PB.65.13	ko:K00430	-	PREDICTED: Solanum tuberosum lignin-forming anionic peroxidase-like (LOC102588050), mRNA	0	hypothetical protein H5410_000235	0	#N/A	#N/A	0	7.58e-138	2C0PQ@1|root,2QVXS@2759|Eukaryota,37PB0@33090|Viridiplantae,3G9EZ@35493|Streptophyta,44R00@71274|asterids	3.92e-207	Lignin-forming anionic peroxidase OS=Nicotiana tabacum OX=4097 PE=2 SV=1	3.68e-166	peroxidase
PB.65.14	ko:K00430	-	PREDICTED: Solanum tuberosum lignin-forming anionic peroxidase-like (LOC102588050), mRNA	0	hypothetical protein H5410_000235	0	#N/A	#N/A	0	1.71e-133	2C0PQ@1|root,2QVXS@2759|Eukaryota,37PB0@33090|Viridiplantae,3G9EZ@35493|Streptophyta,44R00@71274|asterids	2.25e-197	Lignin-forming anionic peroxidase OS=Nicotiana tabacum OX=4097 PE=2 SV=1	1.19e-158	peroxidase
PB.65.15	ko:K00430	-	PREDICTED: Solanum tuberosum lignin-forming anionic peroxidase-like (LOC102588050), mRNA	0	hypothetical protein H5410_000235	1.91e-180	#N/A	#N/A	0	9.5e-114	2C0PQ@1|root,2QVXS@2759|Eukaryota,37PB0@33090|Viridiplantae,3G9EZ@35493|Streptophyta,44R00@71274|asterids	8.55e-174	Lignin-forming anionic peroxidase OS=Nicotiana tabacum OX=4097 PE=2 SV=1	2.69e-138	peroxidase
PB.65.16	#N/A	#N/A	#N/A	#N/A	#N/A	#N/A	#N/A	#N/A	#N/A	#N/A	#N/A	#N/A	#N/A	#N/A	#N/A
PB.66.1	ko:K00430	-	PREDICTED: Solanum tuberosum lignin-forming anionic peroxidase-like (LOC102588377), mRNA	0	PREDICTED: lignin-forming anionic peroxidase-like	0	#N/A	#N/A	0	8.31e-146	2C0PQ@1|root,2QVXS@2759|Eukaryota,37PB0@33090|Viridiplantae,3G9EZ@35493|Streptophyta,44R00@71274|asterids	5.88e-230	Lignin-forming anionic peroxidase OS=Nicotiana tabacum OX=4097 PE=2 SV=1	0	peroxidase
PB.67.1	-	-	PREDICTED: Solanum tuberosum RNA-binding protein 26-like (LOC102591817), transcript variant X2, mRNA	0	PREDICTED: RNA-binding protein 26-like isoform X2	1.17e-61	#N/A	#N/A	#N/A	#N/A	2CMI8@1|root,2QQEE@2759|Eukaryota,381RP@33090|Viridiplantae,3GW6W@35493|Streptophyta,44SRC@71274|asterids	5.88e-70	#N/A	#N/A	#N/A
PB.67.2	-	-	PREDICTED: Solanum tuberosum RNA-binding protein 26-like (LOC102591817), transcript variant X1, mRNA	0	hypothetical protein H5410_000249	2.99e-81	#N/A	#N/A	#N/A	#N/A	2CMI8@1|root,2QQEE@2759|Eukaryota,381RP@33090|Viridiplantae,3GW6W@35493|Streptophyta,44SRC@71274|asterids	2.24e-88	#N/A	#N/A	#N/A
PB.67.3	#N/A	#N/A	#N/A	#N/A	#N/A	#N/A	#N/A	#N/A	#N/A	#N/A	#N/A	#N/A	#N/A	#N/A	#N/A
PB.68.1	-	GO:0005575,GO:0005622,GO:0005623,GO:0005737,GO:0009507,GO:0009526,GO:0009534,GO:0009535,GO:0009536,GO:0009579,GO:0009941,GO:0016020,GO:0031967,GO:0031975,GO:0031976,GO:0031984,GO:0034357,GO:0042651,GO:0043226,GO:0043227,GO:0043229,GO:0043231,GO:0044422,GO:0044424,GO:0044434,GO:0044435,GO:0044436,GO:0044444,GO:0044446,GO:0044464,GO:0055035	PREDICTED: Solanum tuberosum probable plastid-lipid-associated protein 12, chloroplastic (LOC102589359), mRNA	0	hypothetical protein KY290_003663	0	#N/A	#N/A	#N/A	#N/A	2CN7K@1|root,2QUCQ@2759|Eukaryota,37M35@33090|Viridiplantae,3GEF5@35493|Streptophyta,44FCV@71274|asterids	1.51e-281	Probable plastid-lipid-associated protein 12, chloroplastic OS=Arabidopsis thaliana OX=3702 GN=PAP12 PE=1 SV=1	7.44e-176	PAP_fibrillin
PB.68.2	-	GO:0005575,GO:0005622,GO:0005623,GO:0005737,GO:0009507,GO:0009526,GO:0009534,GO:0009535,GO:0009536,GO:0009579,GO:0009941,GO:0016020,GO:0031967,GO:0031975,GO:0031976,GO:0031984,GO:0034357,GO:0042651,GO:0043226,GO:0043227,GO:0043229,GO:0043231,GO:0044422,GO:0044424,GO:0044434,GO:0044435,GO:0044436,GO:0044444,GO:0044446,GO:0044464,GO:0055035	PREDICTED: Solanum tuberosum probable plastid-lipid-associated protein 12, chloroplastic (LOC102589359), mRNA	0	hypothetical protein KY290_003663	0	#N/A	#N/A	#N/A	#N/A	2CN7K@1|root,2QUCQ@2759|Eukaryota,37M35@33090|Viridiplantae,3GEF5@35493|Streptophyta,44FCV@71274|asterids	9.14e-283	Probable plastid-lipid-associated protein 12, chloroplastic OS=Arabidopsis thaliana OX=3702 GN=PAP12 PE=1 SV=1	2.94e-176	PAP_fibrillin
PB.69.1	ko:K10256,ko:K21704,ko:K21736	GO:0003674,GO:0003824,GO:0004497,GO:0005575,GO:0005622,GO:0005623,GO:0005737,GO:0005783,GO:0005789,GO:0008150,GO:0008152,GO:0012505,GO:0016020,GO:0016021,GO:0016491,GO:0016705,GO:0016709,GO:0030176,GO:0031224,GO:0031227,GO:0031984,GO:0042175,GO:0043226,GO:0043227,GO:0043229,GO:0043231,GO:0044422,GO:0044424,GO:0044425,GO:0044432,GO:0044444,GO:0044446,GO:0044464,GO:0050183,GO:0055114,GO:0098827	S.commersonii mRNA for D12 oleate desaturase	0	hypothetical protein H5410_000260	1.26e-155	Delta-15 acyl-phospholipid desaturase [Calothrix sp. PCC 7507]	1.87e-39	0	1.01e-26	COG3239@1|root,2QQNB@2759|Eukaryota,37ITJ@33090|Viridiplantae,3GARN@35493|Streptophyta,44GY5@71274|asterids	7.37e-161	Omega-6 fatty acid desaturase, endoplasmic reticulum isozyme 2 OS=Glycine max OX=3847 GN=FAD2-2 PE=2 SV=1	6.07e-135	FA_desaturase
PB.69.2	ko:K10256,ko:K21704,ko:K21736	GO:0003674,GO:0003824,GO:0004497,GO:0005575,GO:0005622,GO:0005623,GO:0005737,GO:0005783,GO:0005789,GO:0008150,GO:0008152,GO:0012505,GO:0016020,GO:0016021,GO:0016491,GO:0016705,GO:0016709,GO:0030176,GO:0031224,GO:0031227,GO:0031984,GO:0042175,GO:0043226,GO:0043227,GO:0043229,GO:0043231,GO:0044422,GO:0044424,GO:0044425,GO:0044432,GO:0044444,GO:0044446,GO:0044464,GO:0050183,GO:0055114,GO:0098827	S.commersonii mRNA for D12 oleate desaturase	0	hypothetical protein H5410_000260	0	Delta-15 acyl-phospholipid desaturase [Anabaena cylindrica PCC 7122]	1.85e-80	0	1.57e-61	COG3239@1|root,2QQNB@2759|Eukaryota,37ITJ@33090|Viridiplantae,3GARN@35493|Streptophyta,44GY5@71274|asterids	1.09e-298	Delta(12)-acyl-lipid-desaturase OS=Punica granatum OX=22663 GN=FAD12 PE=2 SV=2	0	DUF3474 & FA_desaturase
PB.69.3	ko:K10256,ko:K21704,ko:K21736	GO:0003674,GO:0003824,GO:0004497,GO:0005575,GO:0005622,GO:0005623,GO:0005737,GO:0005783,GO:0005789,GO:0008150,GO:0008152,GO:0012505,GO:0016020,GO:0016021,GO:0016491,GO:0016705,GO:0016709,GO:0030176,GO:0031224,GO:0031227,GO:0031984,GO:0042175,GO:0043226,GO:0043227,GO:0043229,GO:0043231,GO:0044422,GO:0044424,GO:0044425,GO:0044432,GO:0044444,GO:0044446,GO:0044464,GO:0050183,GO:0055114,GO:0098827	S.commersonii mRNA for D12 oleate desaturase	0	hypothetical protein H5410_000260	0	Delta-15 acyl-phospholipid desaturase [Anabaena cylindrica PCC 7122]	1.85e-80	0	1.57e-61	COG3239@1|root,2QQNB@2759|Eukaryota,37ITJ@33090|Viridiplantae,3GARN@35493|Streptophyta,44GY5@71274|asterids	1.09e-298	Delta(12)-acyl-lipid-desaturase OS=Punica granatum OX=22663 GN=FAD12 PE=2 SV=2	0	DUF3474 & FA_desaturase
PB.69.4	ko:K10256,ko:K21704,ko:K21736	GO:0003674,GO:0003824,GO:0004497,GO:0005575,GO:0005622,GO:0005623,GO:0005737,GO:0005783,GO:0005789,GO:0008150,GO:0008152,GO:0012505,GO:0016020,GO:0016021,GO:0016491,GO:0016705,GO:0016709,GO:0030176,GO:0031224,GO:0031227,GO:0031984,GO:0042175,GO:0043226,GO:0043227,GO:0043229,GO:0043231,GO:0044422,GO:0044424,GO:0044425,GO:0044432,GO:0044444,GO:0044446,GO:0044464,GO:0050183,GO:0055114,GO:0098827	S.commersonii mRNA for D12 oleate desaturase	0	hypothetical protein H5410_000260	0	Delta-15 acyl-phospholipid desaturase [Anabaena cylindrica PCC 7122]	1.85e-80	0	1.57e-61	COG3239@1|root,2QQNB@2759|Eukaryota,37ITJ@33090|Viridiplantae,3GARN@35493|Streptophyta,44GY5@71274|asterids	1.09e-298	Delta(12)-acyl-lipid-desaturase OS=Punica granatum OX=22663 GN=FAD12 PE=2 SV=2	0	DUF3474 & FA_desaturase
PB.70.1	-	-	PREDICTED: Solanum tuberosum UPF0061 protein azo1574-like (LOC102594135), mRNA	0	hypothetical protein KY289_000142	0	hypothetical protein Despr_1878 [Desulfobulbus propionicus DSM 2032]	1.5e-141	Uncharacterized conserved protein (YdiU family)	1.95e-137	COG0397@1|root,KOG2542@2759|Eukaryota,37N0Z@33090|Viridiplantae,3GBP2@35493|Streptophyta,44Q8J@71274|asterids	0.0	Protein adenylyltransferase SelO OS=Azoarcus sp. (strain BH72) OX=418699 GN=selO PE=3 SV=1	2.48e-135	SelO
PB.71.1	ko:K00208	GO:0003674,GO:0003824,GO:0005488,GO:0005507,GO:0005575,GO:0005622,GO:0005623,GO:0005737,GO:0005829,GO:0005835,GO:0006082,GO:0006629,GO:0006631,GO:0006633,GO:0008150,GO:0008152,GO:0008610,GO:0009058,GO:0009507,GO:0009526,GO:0009532,GO:0009536,GO:0009570,GO:0009579,GO:0009941,GO:0009987,GO:0016053,GO:0016491,GO:0016627,GO:0016628,GO:0016631,GO:0019752,GO:0031967,GO:0031975,GO:0032787,GO:0032991,GO:…	PREDICTED: Solanum tuberosum enoyl-[acyl-carrier-protein] reductase [NADH], chloroplastic-like (LOC102593496), mRNA	0	hypothetical protein H5410_000262	0	enoyl-ACP reductase [Parachlamydia acanthamoebae UV-7]	1.76e-152	#N/A	#N/A	COG1028@1|root,KOG0725@2759|Eukaryota,37KEZ@33090|Viridiplantae,3GDCE@35493|Streptophyta,44CAN@71274|asterids	9.18e-266	Enoyl-[acyl-carrier-protein] reductase [NADH], chloroplastic OS=Arabidopsis thaliana OX=3702 GN=MOD1 PE=1 SV=1	0	adh_short_C2 & adh_short
PB.71.2	ko:K00208	GO:0003674,GO:0003824,GO:0005488,GO:0005507,GO:0005575,GO:0005622,GO:0005623,GO:0005737,GO:0005829,GO:0005835,GO:0006082,GO:0006629,GO:0006631,GO:0006633,GO:0008150,GO:0008152,GO:0008610,GO:0009058,GO:0009507,GO:0009526,GO:0009532,GO:0009536,GO:0009570,GO:0009579,GO:0009941,GO:0009987,GO:0016053,GO:0016491,GO:0016627,GO:0016628,GO:0016631,GO:0019752,GO:0031967,GO:0031975,GO:0032787,GO:0032991,GO:…	PREDICTED: Solanum tuberosum enoyl-[acyl-carrier-protein] reductase [NADH], chloroplastic-like (LOC102593496), mRNA	0	hypothetical protein KY290_000138	0	enoyl-ACP reductase [Parachlamydia acanthamoebae UV-7]	1.18e-152	#N/A	#N/A	COG1028@1|root,KOG0725@2759|Eukaryota,37KEZ@33090|Viridiplantae,3GDCE@35493|Streptophyta,44CAN@71274|asterids	1.59e-266	Enoyl-[acyl-carrier-protein] reductase [NADH], chloroplastic OS=Arabidopsis thaliana OX=3702 GN=MOD1 PE=1 SV=1	0	adh_short_C2 & adh_short
PB.72.1	ko:K00008	GO:0003674,GO:0003824,GO:0003939,GO:0005575,GO:0005622,GO:0005623,GO:0005737,GO:0005829,GO:0005911,GO:0008150,GO:0008152,GO:0009506,GO:0016491,GO:0016614,GO:0016616,GO:0030054,GO:0044424,GO:0044444,GO:0044464,GO:0055044,GO:0055114	PREDICTED: Solanum pennellii sorbitol dehydrogenase (LOC107007808), transcript variant X1, mRNA	0	hypothetical protein KY289_004008	0	zinc-binding dehydrogenase [Saccharopolyspora erythraea NRRL 2338]	1.32e-94	Sorbitol dehydrogenase	6.05e-87	COG1063@1|root,KOG0024@2759|Eukaryota,37QX2@33090|Viridiplantae,3GAKK@35493|Streptophyta,44I3H@71274|asterids	1.15e-263	Sorbitol dehydrogenase OS=Arabidopsis thaliana OX=3702 GN=SDH PE=1 SV=1	0	ADH_N & Glu_dehyd_C & ADH_zinc_N & ADH_zinc_N_2
PB.72.2	ko:K00008	GO:0003674,GO:0003824,GO:0003939,GO:0005575,GO:0005622,GO:0005623,GO:0005737,GO:0005829,GO:0005911,GO:0008150,GO:0008152,GO:0009506,GO:0016491,GO:0016614,GO:0016616,GO:0030054,GO:0044424,GO:0044444,GO:0044464,GO:0055044,GO:0055114	PREDICTED: Solanum pennellii sorbitol dehydrogenase (LOC107007808), transcript variant X1, mRNA	0	hypothetical protein KY289_004008	0	zinc-binding dehydrogenase [Saccharopolyspora erythraea NRRL 2338]	1.32e-94	Sorbitol dehydrogenase	6.05e-87	COG1063@1|root,KOG0024@2759|Eukaryota,37QX2@33090|Viridiplantae,3GAKK@35493|Streptophyta,44I3H@71274|asterids	1.15e-263	Sorbitol dehydrogenase OS=Arabidopsis thaliana OX=3702 GN=SDH PE=1 SV=1	0	ADH_N & Glu_dehyd_C & ADH_zinc_N & ADH_zinc_N_2
PB.72.3	ko:K00008	GO:0003674,GO:0003824,GO:0003939,GO:0005575,GO:0005622,GO:0005623,GO:0005737,GO:0005829,GO:0005911,GO:0008150,GO:0008152,GO:0009506,GO:0016491,GO:0016614,GO:0016616,GO:0030054,GO:0044424,GO:0044444,GO:0044464,GO:0055044,GO:0055114	PREDICTED: Solanum pennellii sorbitol dehydrogenase (LOC107007808), transcript variant X1, mRNA	0	hypothetical protein KY289_004008	0	zinc-binding dehydrogenase [Saccharopolyspora erythraea NRRL 2338]	1.32e-94	Sorbitol dehydrogenase	6.05e-87	COG1063@1|root,KOG0024@2759|Eukaryota,37QX2@33090|Viridiplantae,3GAKK@35493|Streptophyta,44I3H@71274|asterids	1.15e-263	Sorbitol dehydrogenase OS=Arabidopsis thaliana OX=3702 GN=SDH PE=1 SV=1	0	ADH_N & Glu_dehyd_C & ADH_zinc_N & ADH_zinc_N_2
PB.72.4	ko:K00008	GO:0003674,GO:0003824,GO:0003939,GO:0005575,GO:0005622,GO:0005623,GO:0005737,GO:0005829,GO:0005911,GO:0008150,GO:0008152,GO:0009506,GO:0016491,GO:0016614,GO:0016616,GO:0030054,GO:0044424,GO:0044444,GO:0044464,GO:0055044,GO:0055114	PREDICTED: Solanum pennellii sorbitol dehydrogenase (LOC107007808), transcript variant X1, mRNA	0	hypothetical protein KY289_004008	0	zinc-binding dehydrogenase [Saccharopolyspora erythraea NRRL 2338]	1.32e-94	Sorbitol dehydrogenase	6.05e-87	COG1063@1|root,KOG0024@2759|Eukaryota,37QX2@33090|Viridiplantae,3GAKK@35493|Streptophyta,44I3H@71274|asterids	1.15e-263	Sorbitol dehydrogenase OS=Arabidopsis thaliana OX=3702 GN=SDH PE=1 SV=1	0	ADH_N & Glu_dehyd_C & ADH_zinc_N & ADH_zinc_N_2
PB.72.5	ko:K00008	GO:0003674,GO:0003824,GO:0003939,GO:0005575,GO:0005622,GO:0005623,GO:0005737,GO:0005829,GO:0005911,GO:0008150,GO:0008152,GO:0009506,GO:0016491,GO:0016614,GO:0016616,GO:0030054,GO:0044424,GO:0044444,GO:0044464,GO:0055044,GO:0055114	PREDICTED: Solanum pennellii sorbitol dehydrogenase (LOC107007808), transcript variant X1, mRNA	1.7e-168	hypothetical protein H5410_000270	9.7e-78	zinc-binding dehydrogenase [Saccharopolyspora erythraea NRRL 2338]	4.63e-18	Sorbitol dehydrogenase	5.91e-15	COG1063@1|root,KOG0024@2759|Eukaryota,37QX2@33090|Viridiplantae,3GAKK@35493|Streptophyta,44I3H@71274|asterids	3.02e-77	Sorbitol dehydrogenase OS=Arabidopsis thaliana OX=3702 GN=SDH PE=1 SV=1	4.39e-68	ADH_zinc_N & ADH_zinc_N_2
PB.73.1	-	-	PREDICTED: Solanum tuberosum G-type lectin S-receptor-like serine/threonine-protein kinase RLK1 (LOC102594793), mRNA	0	hypothetical protein H5410_000271	0	hypothetical protein Aasi_1443 [Candidatus Amoebophilus asiaticus 5a2]	7.4e-24	0	4.5e-112	COG0515@1|root,2QQEW@2759|Eukaryota,37HW6@33090|Viridiplantae,3G7JQ@35493|Streptophyta,44D1M@71274|asterids	0.0	G-type lectin S-receptor-like serine/threonine-protein kinase RLK1 OS=Arabidopsis thaliana OX=3702 GN=RLK1 PE=2 SV=2	0	B_lectin & S_locus_glycop & PK_Tyr_Ser-Thr & Pkinase
PB.74.1	-	-	PREDICTED: Solanum tuberosum G-type lectin S-receptor-like serine/threonine-protein kinase RLK1 (LOC102595458), mRNA	0	hypothetical protein H5410_000328	0	hypothetical protein Aasi_1443 [Candidatus Amoebophilus asiaticus 5a2]	4.87e-23	0	5.53e-119	COG0515@1|root,2QQEW@2759|Eukaryota,37HW6@33090|Viridiplantae,3G7JQ@35493|Streptophyta,44D1M@71274|asterids	0.0	G-type lectin S-receptor-like serine/threonine-protein kinase RLK1 OS=Arabidopsis thaliana OX=3702 GN=RLK1 PE=2 SV=2	0	B_lectin & PK_Tyr_Ser-Thr & Pkinase
PB.75.1	-	GO:0003674,GO:0003676,GO:0003723,GO:0003824,GO:0004518,GO:0004519,GO:0005488,GO:0005575,GO:0005622,GO:0005623,GO:0006139,GO:0006725,GO:0006807,GO:0008150,GO:0008152,GO:0009451,GO:0009987,GO:0016070,GO:0016787,GO:0016788,GO:0034641,GO:0043170,GO:0043226,GO:0043227,GO:0043229,GO:0043231,GO:0043412,GO:0044237,GO:0044238,GO:0044424,GO:0044464,GO:0046483,GO:0071704,GO:0090304,GO:0090305,GO:0097159,GO:…	PREDICTED: Solanum tuberosum pentatricopeptide repeat-containing protein At5g48730, chloroplastic (LOC102594466), mRNA	0	hypothetical protein KY284_000146	0	#N/A	#N/A	FOG: PPR repeat	3.32e-43	KOG4197@1|root,KOG4197@2759|Eukaryota,37N2K@33090|Viridiplantae,3G9SK@35493|Streptophyta,44CRM@71274|asterids	4.13e-210	Pentatricopeptide repeat-containing protein At5g48730, chloroplastic OS=Arabidopsis thaliana OX=3702 GN=At5g48730 PE=2 SV=2	0	PPR_long & PPR_3 & PPR_2 & PPR & PPR_1
PB.76.1	ko:K00454	GO:0003674,GO:0003824,GO:0005575,GO:0005622,GO:0005623,GO:0005737,GO:0006082,GO:0006629,GO:0006631,GO:0006690,GO:0008150,GO:0008152,GO:0009507,GO:0009532,GO:0009534,GO:0009536,GO:0009570,GO:0009579,GO:0009987,GO:0010597,GO:0016165,GO:0016491,GO:0016701,GO:0016702,GO:0019372,GO:0019752,GO:0031976,GO:0031984,GO:0032787,GO:0043226,GO:0043227,GO:0043229,GO:0043231,GO:0043436,GO:0044237,GO:0044238,GO:…	PREDICTED: Solanum tuberosum linoleate 13S-lipoxygenase 2-1, chloroplastic-like (LOC102596456), mRNA	0	hypothetical protein H5410_000306	0	#N/A	#N/A	#N/A	#N/A	28IFU@1|root,2QQSP@2759|Eukaryota,37IPE@33090|Viridiplantae,3GE0G@35493|Streptophyta,44Q4G@71274|asterids	0.0	Linoleate 13S-lipoxygenase 2-1, chloroplastic OS=Solanum tuberosum OX=4113 GN=LOX2.1 PE=1 SV=1	0	PLAT & Lipoxygenase
PB.77.1	#N/A	#N/A	#N/A	#N/A	#N/A	#N/A	#N/A	#N/A	#N/A	#N/A	#N/A	#N/A	#N/A	#N/A	#N/A
PB.77.2	-	-	PREDICTED: Solanum tuberosum probable 2-oxoglutarate-dependent dioxygenase AOP1.2 (LOC102589018), mRNA	0	hypothetical protein H5410_000326	0	2OG-Fe(II) oxygenase superfamily protein [Variovorax paradoxus B4]	1.9e-20	Iron/ascorbate family oxidoreductases	4.45e-21	COG3491@1|root,KOG0143@2759|Eukaryota,37IDH@33090|Viridiplantae,3GBER@35493|Streptophyta,44BSD@71274|asterids	1.01e-187	Probable 2-oxoglutarate-dependent dioxygenase AOP1.2 OS=Arabidopsis thaliana OX=3702 GN=AOP1.2 PE=2 SV=1	8.6e-58	DIOX_N & 2OG-FeII_Oxy
PB.77.3	-	-	PREDICTED: Solanum tuberosum probable 2-oxoglutarate-dependent dioxygenase AOP1.2 (LOC102589018), mRNA	0	hypothetical protein H5410_000326	0	2OG-Fe(II) oxygenase superfamily protein [Variovorax paradoxus B4]	1.9e-20	Iron/ascorbate family oxidoreductases	4.45e-21	COG3491@1|root,KOG0143@2759|Eukaryota,37IDH@33090|Viridiplantae,3GBER@35493|Streptophyta,44BSD@71274|asterids	1.01e-187	Probable 2-oxoglutarate-dependent dioxygenase AOP1.2 OS=Arabidopsis thaliana OX=3702 GN=AOP1.2 PE=2 SV=1	8.6e-58	DIOX_N & 2OG-FeII_Oxy
PB.77.4	-	-	Solanum tuberosum cv. Sassy DPS mRNA for spirosolane 16-oxygenase, complete cds	0	hypothetical protein H5410_000326	1.64e-166	2OG-Fe(II) oxygenase superfamily protein [Variovorax paradoxus B4]	5.94e-08	Iron/ascorbate family oxidoreductases	7.7e-08	COG3491@1|root,KOG0143@2759|Eukaryota,37IDH@33090|Viridiplantae,3GBER@35493|Streptophyta,44BSD@71274|asterids	1.84e-146	Probable 2-oxoglutarate-dependent dioxygenase AOP1.2 OS=Arabidopsis thaliana OX=3702 GN=AOP1.2 PE=2 SV=1	9.6e-38	DIOX_N
PB.77.5	-	-	Solanum tuberosum cv. Sassy DPS mRNA for spirosolane 16-oxygenase, complete cds	0	probable 2-oxoglutarate-dependent dioxygenase AOP1.2	2.98e-123	#N/A	#N/A	#N/A	#N/A	COG3491@1|root,KOG0143@2759|Eukaryota,37IDH@33090|Viridiplantae,3GBER@35493|Streptophyta,44BSD@71274|asterids	2.85e-148	Deoxypodophyllotoxin synthase OS=Sinopodophyllum hexandrum OX=93608 GN=2-ODD PE=1 SV=1	6.09e-33	DIOX_N
PB.77.6	-	-	PREDICTED: Solanum tuberosum probable 2-oxoglutarate-dependent dioxygenase AOP1.2 (LOC102589018), mRNA	0	hypothetical protein H5410_000326	2.93e-179	2OG-Fe(II) oxygenase superfamily protein [Variovorax paradoxus B4]	4.82e-18	Iron/ascorbate family oxidoreductases	1.35e-16	COG3491@1|root,KOG0143@2759|Eukaryota,37IDH@33090|Viridiplantae,3GBER@35493|Streptophyta,44BSD@71274|asterids	1.73e-142	Probable 2-oxoglutarate-dependent dioxygenase AOP1.2 OS=Arabidopsis thaliana OX=3702 GN=AOP1.2 PE=2 SV=1	2.58e-37	2OG-FeII_Oxy
PB.77.7	-	-	PREDICTED: Solanum tuberosum probable 2-oxoglutarate-dependent dioxygenase AOP1.2 (LOC102589018), mRNA	0	hypothetical protein H5410_000326	0	2OG-Fe(II) oxygenase superfamily protein [Variovorax paradoxus B4]	1.9e-20	Iron/ascorbate family oxidoreductases	4.45e-21	COG3491@1|root,KOG0143@2759|Eukaryota,37IDH@33090|Viridiplantae,3GBER@35493|Streptophyta,44BSD@71274|asterids	1.01e-187	Probable 2-oxoglutarate-dependent dioxygenase AOP1.2 OS=Arabidopsis thaliana OX=3702 GN=AOP1.2 PE=2 SV=1	8.6e-58	DIOX_N & 2OG-FeII_Oxy
PB.77.8	-	-	PREDICTED: Solanum tuberosum probable 2-oxoglutarate-dependent dioxygenase AOP1.2 (LOC102589018), mRNA	0	hypothetical protein H5410_000326	0	2OG-Fe(II) oxygenase superfamily protein [Variovorax paradoxus B4]	1.9e-20	Iron/ascorbate family oxidoreductases	4.45e-21	COG3491@1|root,KOG0143@2759|Eukaryota,37IDH@33090|Viridiplantae,3GBER@35493|Streptophyta,44BSD@71274|asterids	1.01e-187	Probable 2-oxoglutarate-dependent dioxygenase AOP1.2 OS=Arabidopsis thaliana OX=3702 GN=AOP1.2 PE=2 SV=1	8.6e-58	DIOX_N & 2OG-FeII_Oxy
PB.77.9	-	-	Solanum tuberosum cultivar MSH/14-112 chromosome 1	0	hypothetical protein H5410_000326	2.56e-84	#N/A	#N/A	#N/A	#N/A	COG3491@1|root,KOG0143@2759|Eukaryota,37IDH@33090|Viridiplantae,3GBER@35493|Streptophyta,44BSD@71274|asterids	4.07e-83	Deoxypodophyllotoxin synthase OS=Sinopodophyllum hexandrum OX=93608 GN=2-ODD PE=1 SV=1	2.17e-17	DIOX_N
PB.78.1	ko:K00454	GO:0003674,GO:0003824,GO:0005575,GO:0005622,GO:0005623,GO:0005737,GO:0006082,GO:0006629,GO:0006631,GO:0006690,GO:0008150,GO:0008152,GO:0009507,GO:0009532,GO:0009534,GO:0009536,GO:0009570,GO:0009579,GO:0009987,GO:0010597,GO:0016165,GO:0016491,GO:0016701,GO:0016702,GO:0019372,GO:0019752,GO:0031976,GO:0031984,GO:0032787,GO:0043226,GO:0043227,GO:0043229,GO:0043231,GO:0043436,GO:0044237,GO:0044238,GO:…	Solanum tuberosum linoleate 13S-lipoxygenase 2-1, chloroplastic-like (LOC102596122), mRNA; nuclear gene for chloroplast product_x005f_x0001_X96405.1 S.tuberosum mRNA for 13-lipoxygenase, clone H1	0	hypothetical protein H5410_000275	0	#N/A	#N/A	#N/A	#N/A	28IFU@1|root,2QQSP@2759|Eukaryota,37IPE@33090|Viridiplantae,3GE0G@35493|Streptophyta,44Q4G@71274|asterids	0.0	Linoleate 13S-lipoxygenase 2-1, chloroplastic OS=Solanum tuberosum OX=4113 GN=LOX2.1 PE=1 SV=1	0	PLAT & Lipoxygenase
PB.78.2	ko:K00454	GO:0003674,GO:0003824,GO:0005575,GO:0005622,GO:0005623,GO:0005737,GO:0006082,GO:0006629,GO:0006631,GO:0006690,GO:0008150,GO:0008152,GO:0009507,GO:0009532,GO:0009534,GO:0009536,GO:0009570,GO:0009579,GO:0009987,GO:0010597,GO:0016165,GO:0016491,GO:0016701,GO:0016702,GO:0019372,GO:0019752,GO:0031976,GO:0031984,GO:0032787,GO:0043226,GO:0043227,GO:0043229,GO:0043231,GO:0043436,GO:0044237,GO:0044238,GO:…	Solanum tuberosum linoleate 13S-lipoxygenase 2-1, chloroplastic-like (LOC102596122), mRNA; nuclear gene for chloroplast product_x005f_x0001_X96405.1 S.tuberosum mRNA for 13-lipoxygenase, clone H1	0	hypothetical protein H5410_000275	0	#N/A	#N/A	#N/A	#N/A	28IFU@1|root,2QQSP@2759|Eukaryota,37IPE@33090|Viridiplantae,3GE0G@35493|Streptophyta,44Q4G@71274|asterids	0.0	Linoleate 13S-lipoxygenase 2-1, chloroplastic OS=Solanum tuberosum OX=4113 GN=LOX2.1 PE=1 SV=1	0	PLAT & Lipoxygenase
PB.78.3	ko:K00454	GO:0003674,GO:0003824,GO:0005575,GO:0005622,GO:0005623,GO:0005737,GO:0006082,GO:0006629,GO:0006631,GO:0006690,GO:0008150,GO:0008152,GO:0009507,GO:0009532,GO:0009534,GO:0009536,GO:0009570,GO:0009579,GO:0009987,GO:0010597,GO:0016165,GO:0016491,GO:0016701,GO:0016702,GO:0019372,GO:0019752,GO:0031976,GO:0031984,GO:0032787,GO:0043226,GO:0043227,GO:0043229,GO:0043231,GO:0043436,GO:0044237,GO:0044238,GO:…	Solanum tuberosum linoleate 13S-lipoxygenase 2-1, chloroplastic-like (LOC102596122), mRNA; nuclear gene for chloroplast product_x005f_x0001_X96405.1 S.tuberosum mRNA for 13-lipoxygenase, clone H1	0	hypothetical protein H5410_000275	0	#N/A	#N/A	#N/A	#N/A	28IFU@1|root,2QQSP@2759|Eukaryota,37IPE@33090|Viridiplantae,3GE0G@35493|Streptophyta,44Q4G@71274|asterids	0.0	Linoleate 13S-lipoxygenase 2-1, chloroplastic OS=Solanum tuberosum OX=4113 GN=LOX2.1 PE=1 SV=1	0	PLAT & Lipoxygenase
PB.78.4	ko:K00454	GO:0003674,GO:0003824,GO:0005575,GO:0005622,GO:0005623,GO:0005737,GO:0006082,GO:0006629,GO:0006631,GO:0006690,GO:0008150,GO:0008152,GO:0009507,GO:0009532,GO:0009534,GO:0009536,GO:0009570,GO:0009579,GO:0009987,GO:0010597,GO:0016165,GO:0016491,GO:0016701,GO:0016702,GO:0019372,GO:0019752,GO:0031976,GO:0031984,GO:0032787,GO:0043226,GO:0043227,GO:0043229,GO:0043231,GO:0043436,GO:0044237,GO:0044238,GO:…	Solanum tuberosum linoleate 13S-lipoxygenase 2-1, chloroplastic-like (LOC102596122), mRNA; nuclear gene for chloroplast product_x005f_x0001_X96405.1 S.tuberosum mRNA for 13-lipoxygenase, clone H1	0	hypothetical protein H5410_000275	0	#N/A	#N/A	#N/A	#N/A	28IFU@1|root,2QQSP@2759|Eukaryota,37IPE@33090|Viridiplantae,3GE0G@35493|Streptophyta,44Q4G@71274|asterids	0.0	Linoleate 13S-lipoxygenase 2-1, chloroplastic OS=Solanum tuberosum OX=4113 GN=LOX2.1 PE=1 SV=1	0	PLAT & Lipoxygenase
PB.78.5	ko:K00454	GO:0003674,GO:0003824,GO:0005575,GO:0005622,GO:0005623,GO:0005737,GO:0006082,GO:0006629,GO:0006631,GO:0006690,GO:0008150,GO:0008152,GO:0009507,GO:0009532,GO:0009534,GO:0009536,GO:0009570,GO:0009579,GO:0009987,GO:0010597,GO:0016165,GO:0016491,GO:0016701,GO:0016702,GO:0019372,GO:0019752,GO:0031976,GO:0031984,GO:0032787,GO:0043226,GO:0043227,GO:0043229,GO:0043231,GO:0043436,GO:0044237,GO:0044238,GO:…	Solanum tuberosum linoleate 13S-lipoxygenase 2-1, chloroplastic-like (LOC102596122), mRNA; nuclear gene for chloroplast product_x005f_x0001_X96405.1 S.tuberosum mRNA for 13-lipoxygenase, clone H1	0	hypothetical protein H5410_000275	0	#N/A	#N/A	#N/A	#N/A	28IFU@1|root,2QQSP@2759|Eukaryota,37IPE@33090|Viridiplantae,3GE0G@35493|Streptophyta,44Q4G@71274|asterids	0.0	Linoleate 13S-lipoxygenase 2-1, chloroplastic OS=Solanum tuberosum OX=4113 GN=LOX2.1 PE=1 SV=1	0	PLAT & Lipoxygenase
PB.78.6	ko:K00454	GO:0003674,GO:0003824,GO:0005575,GO:0005622,GO:0005623,GO:0005737,GO:0006082,GO:0006629,GO:0006631,GO:0006690,GO:0008150,GO:0008152,GO:0009507,GO:0009532,GO:0009534,GO:0009536,GO:0009570,GO:0009579,GO:0009987,GO:0010597,GO:0016165,GO:0016491,GO:0016701,GO:0016702,GO:0019372,GO:0019752,GO:0031976,GO:0031984,GO:0032787,GO:0043226,GO:0043227,GO:0043229,GO:0043231,GO:0043436,GO:0044237,GO:0044238,GO:…	Solanum tuberosum linoleate 13S-lipoxygenase 2-1, chloroplastic-like (LOC102596122), mRNA; nuclear gene for chloroplast product_x005f_x0001_X96405.1 S.tuberosum mRNA for 13-lipoxygenase, clone H1	0	hypothetical protein H5410_000275	0	#N/A	#N/A	#N/A	#N/A	28IFU@1|root,2QQSP@2759|Eukaryota,37IPE@33090|Viridiplantae,3GE0G@35493|Streptophyta,44Q4G@71274|asterids	0.0	Linoleate 13S-lipoxygenase 2-1, chloroplastic OS=Solanum tuberosum OX=4113 GN=LOX2.1 PE=1 SV=1	0	Lipoxygenase
PB.78.7	ko:K00454	GO:0003674,GO:0003824,GO:0005575,GO:0005622,GO:0005623,GO:0005737,GO:0006082,GO:0006629,GO:0006631,GO:0006690,GO:0008150,GO:0008152,GO:0009507,GO:0009532,GO:0009534,GO:0009536,GO:0009570,GO:0009579,GO:0009987,GO:0010597,GO:0016165,GO:0016491,GO:0016701,GO:0016702,GO:0019372,GO:0019752,GO:0031976,GO:0031984,GO:0032787,GO:0043226,GO:0043227,GO:0043229,GO:0043231,GO:0043436,GO:0044237,GO:0044238,GO:…	Solanum tuberosum linoleate 13S-lipoxygenase 2-1, chloroplastic-like (LOC102596122), mRNA; nuclear gene for chloroplast product_x005f_x0001_X96405.1 S.tuberosum mRNA for 13-lipoxygenase, clone H1	0	hypothetical protein H5410_000275	0	#N/A	#N/A	#N/A	#N/A	28IFU@1|root,2QQSP@2759|Eukaryota,37IPE@33090|Viridiplantae,3GE0G@35493|Streptophyta,44Q4G@71274|asterids	0.0	Linoleate 13S-lipoxygenase 2-1, chloroplastic OS=Solanum tuberosum OX=4113 GN=LOX2.1 PE=1 SV=1	0	Lipoxygenase
PB.78.8	ko:K00454	GO:0003674,GO:0003824,GO:0005575,GO:0005622,GO:0005623,GO:0005737,GO:0006082,GO:0006629,GO:0006631,GO:0006690,GO:0008150,GO:0008152,GO:0009507,GO:0009532,GO:0009534,GO:0009536,GO:0009570,GO:0009579,GO:0009987,GO:0010597,GO:0016165,GO:0016491,GO:0016701,GO:0016702,GO:0019372,GO:0019752,GO:0031976,GO:0031984,GO:0032787,GO:0043226,GO:0043227,GO:0043229,GO:0043231,GO:0043436,GO:0044237,GO:0044238,GO:…	Solanum tuberosum linoleate 13S-lipoxygenase 2-1, chloroplastic-like (LOC102596122), mRNA; nuclear gene for chloroplast product_x005f_x0001_X96405.1 S.tuberosum mRNA for 13-lipoxygenase, clone H1	0	hypothetical protein H5410_000275	0	#N/A	#N/A	#N/A	#N/A	28IFU@1|root,2QQSP@2759|Eukaryota,37IPE@33090|Viridiplantae,3GE0G@35493|Streptophyta,44Q4G@71274|asterids	0.0	Linoleate 13S-lipoxygenase 2-1, chloroplastic OS=Solanum tuberosum OX=4113 GN=LOX2.1 PE=1 SV=1	0	PLAT & Lipoxygenase
PB.78.9	ko:K00454	GO:0003674,GO:0003824,GO:0005575,GO:0005622,GO:0005623,GO:0005737,GO:0006082,GO:0006629,GO:0006631,GO:0006690,GO:0008150,GO:0008152,GO:0009507,GO:0009532,GO:0009534,GO:0009536,GO:0009570,GO:0009579,GO:0009987,GO:0010597,GO:0016165,GO:0016491,GO:0016701,GO:0016702,GO:0019372,GO:0019752,GO:0031976,GO:0031984,GO:0032787,GO:0043226,GO:0043227,GO:0043229,GO:0043231,GO:0043436,GO:0044237,GO:0044238,GO:…	Solanum tuberosum linoleate 13S-lipoxygenase 2-1, chloroplastic-like (LOC102596122), mRNA; nuclear gene for chloroplast product_x005f_x0001_X96405.1 S.tuberosum mRNA for 13-lipoxygenase, clone H1	0	hypothetical protein H5410_000275	0	#N/A	#N/A	#N/A	#N/A	28IFU@1|root,2QQSP@2759|Eukaryota,37IPE@33090|Viridiplantae,3GE0G@35493|Streptophyta,44Q4G@71274|asterids	0.0	Linoleate 13S-lipoxygenase 2-1, chloroplastic OS=Solanum tuberosum OX=4113 GN=LOX2.1 PE=1 SV=1	0	Lipoxygenase
PB.78.10	ko:K00454	GO:0003674,GO:0003824,GO:0005575,GO:0005622,GO:0005623,GO:0005737,GO:0006082,GO:0006629,GO:0006631,GO:0006690,GO:0008150,GO:0008152,GO:0009507,GO:0009532,GO:0009534,GO:0009536,GO:0009570,GO:0009579,GO:0009987,GO:0010597,GO:0016165,GO:0016491,GO:0016701,GO:0016702,GO:0019372,GO:0019752,GO:0031976,GO:0031984,GO:0032787,GO:0043226,GO:0043227,GO:0043229,GO:0043231,GO:0043436,GO:0044237,GO:0044238,GO:…	Solanum tuberosum linoleate 13S-lipoxygenase 2-1, chloroplastic-like (LOC102596122), mRNA; nuclear gene for chloroplast product_x005f_x0001_X96405.1 S.tuberosum mRNA for 13-lipoxygenase, clone H1	0	hypothetical protein H5410_000275	0	#N/A	#N/A	#N/A	#N/A	28IFU@1|root,2QQSP@2759|Eukaryota,37IPE@33090|Viridiplantae,3GE0G@35493|Streptophyta,44Q4G@71274|asterids	0.0	Linoleate 13S-lipoxygenase 2-1, chloroplastic OS=Solanum tuberosum OX=4113 GN=LOX2.1 PE=1 SV=1	0	Lipoxygenase
PB.78.11	ko:K00454	GO:0003674,GO:0003824,GO:0005575,GO:0005622,GO:0005623,GO:0005737,GO:0006082,GO:0006629,GO:0006631,GO:0006690,GO:0008150,GO:0008152,GO:0009507,GO:0009532,GO:0009534,GO:0009536,GO:0009570,GO:0009579,GO:0009987,GO:0010597,GO:0016165,GO:0016491,GO:0016701,GO:0016702,GO:0019372,GO:0019752,GO:0031976,GO:0031984,GO:0032787,GO:0043226,GO:0043227,GO:0043229,GO:0043231,GO:0043436,GO:0044237,GO:0044238,GO:…	Solanum tuberosum linoleate 13S-lipoxygenase 2-1, chloroplastic-like (LOC102596122), mRNA; nuclear gene for chloroplast product_x005f_x0001_X96405.1 S.tuberosum mRNA for 13-lipoxygenase, clone H1	0	hypothetical protein H5410_000275	0	#N/A	#N/A	#N/A	#N/A	28IFU@1|root,2QQSP@2759|Eukaryota,37IPE@33090|Viridiplantae,3GE0G@35493|Streptophyta,44Q4G@71274|asterids	0.0	Linoleate 13S-lipoxygenase 2-1, chloroplastic OS=Solanum tuberosum OX=4113 GN=LOX2.1 PE=1 SV=1	0	Lipoxygenase
PB.78.12	ko:K00454	GO:0003674,GO:0003824,GO:0005575,GO:0005622,GO:0005623,GO:0005737,GO:0006082,GO:0006629,GO:0006631,GO:0006690,GO:0008150,GO:0008152,GO:0009507,GO:0009532,GO:0009534,GO:0009536,GO:0009570,GO:0009579,GO:0009987,GO:0010597,GO:0016165,GO:0016491,GO:0016701,GO:0016702,GO:0019372,GO:0019752,GO:0031976,GO:0031984,GO:0032787,GO:0043226,GO:0043227,GO:0043229,GO:0043231,GO:0043436,GO:0044237,GO:0044238,GO:…	Solanum tuberosum linoleate 13S-lipoxygenase 2-1, chloroplastic-like (LOC102596122), mRNA; nuclear gene for chloroplast product_x005f_x0001_X96405.1 S.tuberosum mRNA for 13-lipoxygenase, clone H1	0	hypothetical protein H5410_000275	0	#N/A	#N/A	#N/A	#N/A	28IFU@1|root,2QQSP@2759|Eukaryota,37IPE@33090|Viridiplantae,3GE0G@35493|Streptophyta,44Q4G@71274|asterids	0.0	Linoleate 13S-lipoxygenase 2-1, chloroplastic OS=Solanum tuberosum OX=4113 GN=LOX2.1 PE=1 SV=1	0	Lipoxygenase
PB.78.13	ko:K00454	GO:0003674,GO:0003824,GO:0005575,GO:0005622,GO:0005623,GO:0005737,GO:0006082,GO:0006629,GO:0006631,GO:0006690,GO:0008150,GO:0008152,GO:0009507,GO:0009532,GO:0009534,GO:0009536,GO:0009570,GO:0009579,GO:0009987,GO:0010597,GO:0016165,GO:0016491,GO:0016701,GO:0016702,GO:0019372,GO:0019752,GO:0031976,GO:0031984,GO:0032787,GO:0043226,GO:0043227,GO:0043229,GO:0043231,GO:0043436,GO:0044237,GO:0044238,GO:…	Solanum tuberosum linoleate 13S-lipoxygenase 2-1, chloroplastic-like (LOC102596122), mRNA; nuclear gene for chloroplast product_x005f_x0001_X96405.1 S.tuberosum mRNA for 13-lipoxygenase, clone H1	0	hypothetical protein H5410_000275	0	#N/A	#N/A	#N/A	#N/A	28IFU@1|root,2QQSP@2759|Eukaryota,37IPE@33090|Viridiplantae,3GE0G@35493|Streptophyta,44Q4G@71274|asterids	0.0	Linoleate 13S-lipoxygenase 2-1, chloroplastic OS=Solanum tuberosum OX=4113 GN=LOX2.1 PE=1 SV=1	0	Lipoxygenase
PB.78.14	ko:K00454	GO:0003674,GO:0003824,GO:0005575,GO:0005622,GO:0005623,GO:0005737,GO:0006082,GO:0006629,GO:0006631,GO:0006690,GO:0008150,GO:0008152,GO:0009507,GO:0009532,GO:0009534,GO:0009536,GO:0009570,GO:0009579,GO:0009987,GO:0010597,GO:0016165,GO:0016491,GO:0016701,GO:0016702,GO:0019372,GO:0019752,GO:0031976,GO:0031984,GO:0032787,GO:0043226,GO:0043227,GO:0043229,GO:0043231,GO:0043436,GO:0044237,GO:0044238,GO:…	Solanum tuberosum linoleate 13S-lipoxygenase 2-1, chloroplastic-like (LOC102596122), mRNA; nuclear gene for chloroplast product_x005f_x0001_X96405.1 S.tuberosum mRNA for 13-lipoxygenase, clone H1	0	hypothetical protein H5410_000275	0	#N/A	#N/A	#N/A	#N/A	28IFU@1|root,2QQSP@2759|Eukaryota,37IPE@33090|Viridiplantae,3GE0G@35493|Streptophyta,44Q4G@71274|asterids	5.14e-287	Linoleate 13S-lipoxygenase 2-1, chloroplastic OS=Solanum tuberosum OX=4113 GN=LOX2.1 PE=1 SV=1	0	Lipoxygenase
PB.78.15	ko:K00454	GO:0003674,GO:0003824,GO:0005575,GO:0005622,GO:0005623,GO:0005737,GO:0006082,GO:0006629,GO:0006631,GO:0006690,GO:0008150,GO:0008152,GO:0009507,GO:0009532,GO:0009534,GO:0009536,GO:0009570,GO:0009579,GO:0009987,GO:0010597,GO:0016165,GO:0016491,GO:0016701,GO:0016702,GO:0019372,GO:0019752,GO:0031976,GO:0031984,GO:0032787,GO:0043226,GO:0043227,GO:0043229,GO:0043231,GO:0043436,GO:0044237,GO:0044238,GO:…	Solanum tuberosum linoleate 13S-lipoxygenase 2-1, chloroplastic-like (LOC102596122), mRNA; nuclear gene for chloroplast product_x005f_x0001_X96405.1 S.tuberosum mRNA for 13-lipoxygenase, clone H1	0	hypothetical protein H5410_000275	0	#N/A	#N/A	#N/A	#N/A	28IFU@1|root,2QQSP@2759|Eukaryota,37IPE@33090|Viridiplantae,3GE0G@35493|Streptophyta,44Q4G@71274|asterids	0.0	Linoleate 13S-lipoxygenase 2-1, chloroplastic OS=Solanum tuberosum OX=4113 GN=LOX2.1 PE=1 SV=1	0	Lipoxygenase
PB.78.16	ko:K00454	GO:0003674,GO:0003824,GO:0005575,GO:0005622,GO:0005623,GO:0005737,GO:0006082,GO:0006629,GO:0006631,GO:0006690,GO:0008150,GO:0008152,GO:0009507,GO:0009532,GO:0009534,GO:0009536,GO:0009570,GO:0009579,GO:0009987,GO:0010597,GO:0016165,GO:0016491,GO:0016701,GO:0016702,GO:0019372,GO:0019752,GO:0031976,GO:0031984,GO:0032787,GO:0043226,GO:0043227,GO:0043229,GO:0043231,GO:0043436,GO:0044237,GO:0044238,GO:…	Solanum tuberosum linoleate 13S-lipoxygenase 2-1, chloroplastic-like (LOC102596122), mRNA; nuclear gene for chloroplast product_x005f_x0001_X96405.1 S.tuberosum mRNA for 13-lipoxygenase, clone H1	0	hypothetical protein H5410_000275	0	#N/A	#N/A	#N/A	#N/A	28IFU@1|root,2QQSP@2759|Eukaryota,37IPE@33090|Viridiplantae,3GE0G@35493|Streptophyta,44Q4G@71274|asterids	1.17e-293	Linoleate 13S-lipoxygenase 2-1, chloroplastic OS=Solanum tuberosum OX=4113 GN=LOX2.1 PE=1 SV=1	0	Lipoxygenase
PB.78.17	ko:K00454	GO:0003674,GO:0003824,GO:0005575,GO:0005622,GO:0005623,GO:0005737,GO:0006082,GO:0006629,GO:0006631,GO:0006690,GO:0008150,GO:0008152,GO:0009507,GO:0009532,GO:0009534,GO:0009536,GO:0009570,GO:0009579,GO:0009987,GO:0010597,GO:0016165,GO:0016491,GO:0016701,GO:0016702,GO:0019372,GO:0019752,GO:0031976,GO:0031984,GO:0032787,GO:0043226,GO:0043227,GO:0043229,GO:0043231,GO:0043436,GO:0044237,GO:0044238,GO:…	Solanum tuberosum linoleate 13S-lipoxygenase 2-1, chloroplastic-like (LOC102596122), mRNA; nuclear gene for chloroplast product_x005f_x0001_X96405.1 S.tuberosum mRNA for 13-lipoxygenase, clone H1	0	hypothetical protein H5410_000275	0	#N/A	#N/A	#N/A	#N/A	28IFU@1|root,2QQSP@2759|Eukaryota,37IPE@33090|Viridiplantae,3GE0G@35493|Streptophyta,44Q4G@71274|asterids	1.45e-271	Linoleate 13S-lipoxygenase 2-1, chloroplastic OS=Solanum tuberosum OX=4113 GN=LOX2.1 PE=1 SV=1	0	Lipoxygenase
PB.78.18	ko:K00454	GO:0003674,GO:0003824,GO:0005575,GO:0005622,GO:0005623,GO:0005737,GO:0006082,GO:0006629,GO:0006631,GO:0006690,GO:0008150,GO:0008152,GO:0009507,GO:0009532,GO:0009534,GO:0009536,GO:0009570,GO:0009579,GO:0009987,GO:0010597,GO:0016165,GO:0016491,GO:0016701,GO:0016702,GO:0019372,GO:0019752,GO:0031976,GO:0031984,GO:0032787,GO:0043226,GO:0043227,GO:0043229,GO:0043231,GO:0043436,GO:0044237,GO:0044238,GO:…	Solanum tuberosum linoleate 13S-lipoxygenase 2-1, chloroplastic-like (LOC102596122), mRNA; nuclear gene for chloroplast product_x005f_x0001_X96405.1 S.tuberosum mRNA for 13-lipoxygenase, clone H1	0	hypothetical protein H5410_000275	0	#N/A	#N/A	#N/A	#N/A	28IFU@1|root,2QQSP@2759|Eukaryota,37IPE@33090|Viridiplantae,3GE0G@35493|Streptophyta,44Q4G@71274|asterids	9.47e-223	Linoleate 13S-lipoxygenase 2-1, chloroplastic OS=Solanum tuberosum OX=4113 GN=LOX2.1 PE=1 SV=1	0	Lipoxygenase
PB.78.19	ko:K00454	GO:0003674,GO:0003824,GO:0005575,GO:0005622,GO:0005623,GO:0005737,GO:0006082,GO:0006629,GO:0006631,GO:0006690,GO:0008150,GO:0008152,GO:0009507,GO:0009532,GO:0009534,GO:0009536,GO:0009570,GO:0009579,GO:0009987,GO:0010597,GO:0016165,GO:0016491,GO:0016701,GO:0016702,GO:0019372,GO:0019752,GO:0031976,GO:0031984,GO:0032787,GO:0043226,GO:0043227,GO:0043229,GO:0043231,GO:0043436,GO:0044237,GO:0044238,GO:…	Solanum tuberosum linoleate 13S-lipoxygenase 2-1, chloroplastic-like (LOC102596122), mRNA; nuclear gene for chloroplast product_x005f_x0001_X96405.1 S.tuberosum mRNA for 13-lipoxygenase, clone H1	0	hypothetical protein H5410_000275	0	#N/A	#N/A	#N/A	#N/A	28IFU@1|root,2QQSP@2759|Eukaryota,37IPE@33090|Viridiplantae,3GE0G@35493|Streptophyta,44Q4G@71274|asterids	6.18e-188	Linoleate 13S-lipoxygenase 2-1, chloroplastic OS=Solanum tuberosum OX=4113 GN=LOX2.1 PE=1 SV=1	0	Lipoxygenase
PB.78.20	ko:K00454	GO:0003674,GO:0003824,GO:0005575,GO:0005622,GO:0005623,GO:0005737,GO:0006082,GO:0006629,GO:0006631,GO:0006690,GO:0008150,GO:0008152,GO:0009507,GO:0009532,GO:0009534,GO:0009536,GO:0009570,GO:0009579,GO:0009987,GO:0010597,GO:0016165,GO:0016491,GO:0016701,GO:0016702,GO:0019372,GO:0019752,GO:0031976,GO:0031984,GO:0032787,GO:0043226,GO:0043227,GO:0043229,GO:0043231,GO:0043436,GO:0044237,GO:0044238,GO:…	Solanum tuberosum linoleate 13S-lipoxygenase 2-1, chloroplastic-like (LOC102596122), mRNA; nuclear gene for chloroplast product_x005f_x0001_X96405.1 S.tuberosum mRNA for 13-lipoxygenase, clone H1	0	hypothetical protein H5410_000275	1.34e-126	#N/A	#N/A	#N/A	#N/A	28IFU@1|root,2QQSP@2759|Eukaryota,37IPE@33090|Viridiplantae,3GE0G@35493|Streptophyta,44Q4G@71274|asterids	4.81e-116	Linoleate 13S-lipoxygenase 2-1, chloroplastic OS=Solanum tuberosum OX=4113 GN=LOX2.1 PE=1 SV=1	2.06e-127	Lipoxygenase
PB.78.21	#N/A	#N/A	#N/A	#N/A	#N/A	#N/A	#N/A	#N/A	#N/A	#N/A	#N/A	#N/A	#N/A	#N/A	#N/A
PB.79.1	-	GO:0003674,GO:0003824,GO:0006139,GO:0006725,GO:0006732,GO:0006733,GO:0006739,GO:0006740,GO:0006753,GO:0006793,GO:0006796,GO:0006807,GO:0008150,GO:0008152,GO:0009117,GO:0009987,GO:0016491,GO:0019362,GO:0019637,GO:0034641,GO:0044237,GO:0044238,GO:0044281,GO:0046483,GO:0046496,GO:0051186,GO:0055086,GO:0055114,GO:0071704,GO:0072524,GO:1901360,GO:1901564	PREDICTED: Solanum tuberosum uncharacterized LOC102589993 (LOC102589993), mRNA	0	hypothetical protein KY289_000168	0	oxidoreductase domain-containing protein [Melioribacter roseus P3M-2]	2.76e-26	Predicted oxidoreductase	9.92e-24	COG0673@1|root,KOG2742@2759|Eukaryota,37MM9@33090|Viridiplantae,3GD1J@35493|Streptophyta,44FGU@71274|asterids	1.23e-251	Uncharacterized protein YMR315W OS=Saccharomyces cerevisiae (strain ATCC 204508 / S288c) OX=559292 GN=YMR315W PE=1 SV=1	3.34e-23	GFO_IDH_MocA & GFO_IDH_MocA_C
PB.79.2	-	GO:0003674,GO:0003824,GO:0006139,GO:0006725,GO:0006732,GO:0006733,GO:0006739,GO:0006740,GO:0006753,GO:0006793,GO:0006796,GO:0006807,GO:0008150,GO:0008152,GO:0009117,GO:0009987,GO:0016491,GO:0019362,GO:0019637,GO:0034641,GO:0044237,GO:0044238,GO:0044281,GO:0046483,GO:0046496,GO:0051186,GO:0055086,GO:0055114,GO:0071704,GO:0072524,GO:1901360,GO:1901564	PREDICTED: Solanum tuberosum uncharacterized LOC102589993 (LOC102589993), mRNA	0	hypothetical protein KY289_000168	0	oxidoreductase domain-containing protein [Melioribacter roseus P3M-2]	2.76e-26	Predicted oxidoreductase	9.92e-24	COG0673@1|root,KOG2742@2759|Eukaryota,37MM9@33090|Viridiplantae,3GD1J@35493|Streptophyta,44FGU@71274|asterids	1.23e-251	Uncharacterized protein YMR315W OS=Saccharomyces cerevisiae (strain ATCC 204508 / S288c) OX=559292 GN=YMR315W PE=1 SV=1	3.34e-23	GFO_IDH_MocA & GFO_IDH_MocA_C
PB.79.3	-	GO:0003674,GO:0003824,GO:0006139,GO:0006725,GO:0006732,GO:0006733,GO:0006739,GO:0006740,GO:0006753,GO:0006793,GO:0006796,GO:0006807,GO:0008150,GO:0008152,GO:0009117,GO:0009987,GO:0016491,GO:0019362,GO:0019637,GO:0034641,GO:0044237,GO:0044238,GO:0044281,GO:0046483,GO:0046496,GO:0051186,GO:0055086,GO:0055114,GO:0071704,GO:0072524,GO:1901360,GO:1901564	PREDICTED: Solanum tuberosum uncharacterized LOC102589993 (LOC102589993), mRNA	0	hypothetical protein KY289_000168	0	Gfo/Idh/MocA family NAD(P)-dependent dehydrogenase [Thermococcus kodakarensis KOD1]	2.64e-24	Predicted oxidoreductase	5.01e-23	COG0673@1|root,KOG2742@2759|Eukaryota,37MM9@33090|Viridiplantae,3GD1J@35493|Streptophyta,44FGU@71274|asterids	4.35e-247	Uncharacterized protein YMR315W OS=Saccharomyces cerevisiae (strain ATCC 204508 / S288c) OX=559292 GN=YMR315W PE=1 SV=1	1.68e-22	GFO_IDH_MocA
PB.79.4	-	GO:0003674,GO:0003824,GO:0006139,GO:0006725,GO:0006732,GO:0006733,GO:0006739,GO:0006740,GO:0006753,GO:0006793,GO:0006796,GO:0006807,GO:0008150,GO:0008152,GO:0009117,GO:0009987,GO:0016491,GO:0019362,GO:0019637,GO:0034641,GO:0044237,GO:0044238,GO:0044281,GO:0046483,GO:0046496,GO:0051186,GO:0055086,GO:0055114,GO:0071704,GO:0072524,GO:1901360,GO:1901564	PREDICTED: Solanum tuberosum uncharacterized LOC102589993 (LOC102589993), mRNA	0	hypothetical protein KY289_000168	0	oxidoreductase domain-containing protein [Melioribacter roseus P3M-2]	6.41e-27	Predicted oxidoreductase	1.08e-24	COG0673@1|root,KOG2742@2759|Eukaryota,37MM9@33090|Viridiplantae,3GD1J@35493|Streptophyta,44FGU@71274|asterids	2.12e-252	Uncharacterized protein YMR315W OS=Saccharomyces cerevisiae (strain ATCC 204508 / S288c) OX=559292 GN=YMR315W PE=1 SV=1	3.64e-24	GFO_IDH_MocA & GFO_IDH_MocA_C
PB.79.5	-	GO:0003674,GO:0003824,GO:0006139,GO:0006725,GO:0006732,GO:0006733,GO:0006739,GO:0006740,GO:0006753,GO:0006793,GO:0006796,GO:0006807,GO:0008150,GO:0008152,GO:0009117,GO:0009987,GO:0016491,GO:0019362,GO:0019637,GO:0034641,GO:0044237,GO:0044238,GO:0044281,GO:0046483,GO:0046496,GO:0051186,GO:0055086,GO:0055114,GO:0071704,GO:0072524,GO:1901360,GO:1901564	PREDICTED: Solanum tuberosum uncharacterized LOC102589993 (LOC102589993), mRNA	0	hypothetical protein KY289_000168	0	oxidoreductase domain-containing protein [Melioribacter roseus P3M-2]	1.05e-27	Predicted oxidoreductase	4.06e-25	COG0673@1|root,KOG2742@2759|Eukaryota,37MM9@33090|Viridiplantae,3GD1J@35493|Streptophyta,44FGU@71274|asterids	4.31e-253	Uncharacterized protein YMR315W OS=Saccharomyces cerevisiae (strain ATCC 204508 / S288c) OX=559292 GN=YMR315W PE=1 SV=1	1.36e-24	GFO_IDH_MocA & GFO_IDH_MocA_C
PB.79.6	-	GO:0003674,GO:0003824,GO:0006139,GO:0006725,GO:0006732,GO:0006733,GO:0006739,GO:0006740,GO:0006753,GO:0006793,GO:0006796,GO:0006807,GO:0008150,GO:0008152,GO:0009117,GO:0009987,GO:0016491,GO:0019362,GO:0019637,GO:0034641,GO:0044237,GO:0044238,GO:0044281,GO:0046483,GO:0046496,GO:0051186,GO:0055086,GO:0055114,GO:0071704,GO:0072524,GO:1901360,GO:1901564	PREDICTED: Solanum tuberosum uncharacterized LOC102589993 (LOC102589993), mRNA	0	hypothetical protein KY289_000168	0	oxidoreductase domain-containing protein [Melioribacter roseus P3M-2]	9.4e-28	Predicted oxidoreductase	3.87e-25	COG0673@1|root,KOG2742@2759|Eukaryota,37MM9@33090|Viridiplantae,3GD1J@35493|Streptophyta,44FGU@71274|asterids	5.2e-253	Uncharacterized protein YMR315W OS=Saccharomyces cerevisiae (strain ATCC 204508 / S288c) OX=559292 GN=YMR315W PE=1 SV=1	1.3e-24	GFO_IDH_MocA & GFO_IDH_MocA_C
PB.79.7	-	GO:0003674,GO:0003824,GO:0006139,GO:0006725,GO:0006732,GO:0006733,GO:0006739,GO:0006740,GO:0006753,GO:0006793,GO:0006796,GO:0006807,GO:0008150,GO:0008152,GO:0009117,GO:0009987,GO:0016491,GO:0019362,GO:0019637,GO:0034641,GO:0044237,GO:0044238,GO:0044281,GO:0046483,GO:0046496,GO:0051186,GO:0055086,GO:0055114,GO:0071704,GO:0072524,GO:1901360,GO:1901564	PREDICTED: Solanum tuberosum uncharacterized LOC102589993 (LOC102589993), mRNA	0	hypothetical protein KY289_000168	0	oxidoreductase domain-containing protein [Melioribacter roseus P3M-2]	9.4e-28	Predicted oxidoreductase	3.87e-25	COG0673@1|root,KOG2742@2759|Eukaryota,37MM9@33090|Viridiplantae,3GD1J@35493|Streptophyta,44FGU@71274|asterids	5.2e-253	Uncharacterized protein YMR315W OS=Saccharomyces cerevisiae (strain ATCC 204508 / S288c) OX=559292 GN=YMR315W PE=1 SV=1	1.3e-24	GFO_IDH_MocA & GFO_IDH_MocA_C
PB.80.1	ko:K10277	GO:0000086,GO:0000278,GO:0003674,GO:0003682,GO:0003700,GO:0003824,GO:0005488,GO:0005575,GO:0005622,GO:0005623,GO:0005634,GO:0005654,GO:0005737,GO:0005829,GO:0006325,GO:0006355,GO:0006464,GO:0006479,GO:0006482,GO:0006807,GO:0006996,GO:0007049,GO:0007623,GO:0008150,GO:0008152,GO:0008168,GO:0008170,GO:0008213,GO:0008214,GO:0008276,GO:0008757,GO:0009889,GO:0009891,GO:0009893,GO:0009987,GO:0010452,GO:…	PREDICTED: Solanum tuberosum putative lysine-specific demethylase JMJD5 (LOC102591001), mRNA	0	hypothetical protein KY290_000166	3.8e-112	#N/A	#N/A	#N/A	#N/A	KOG2132@1|root,KOG2132@2759|Eukaryota,37RJP@33090|Viridiplantae,3G7BU@35493|Streptophyta,44HBJ@71274|asterids	8.02e-102	Lysine-specific demethylase JMJ30 OS=Arabidopsis thaliana OX=3702 GN=JMJ30 PE=1 SV=1	2.45e-49	#N/A
PB.81.1	-	-	PREDICTED: Solanum tuberosum IRK-interacting protein-like (LOC102591344), mRNA	0	hypothetical protein H5410_000337	0	#N/A	#N/A	0	4.25e-158	28JMF@1|root,2QS0M@2759|Eukaryota,37T5J@33090|Viridiplantae,3GCYJ@35493|Streptophyta,44CUN@71274|asterids	9.57e-223	IRK-interacting protein OS=Arabidopsis thaliana OX=3702 GN=IRKI PE=1 SV=1	1.43e-157	#N/A
PB.81.2	-	-	PREDICTED: Solanum tuberosum IRK-interacting protein-like (LOC102591344), mRNA	0	hypothetical protein H5410_000337	0	#N/A	#N/A	0	0	28JMF@1|root,2QS0M@2759|Eukaryota,37T5J@33090|Viridiplantae,3GCYJ@35493|Streptophyta,44CUN@71274|asterids	0.0	IRK-interacting protein OS=Arabidopsis thaliana OX=3702 GN=IRKI PE=1 SV=1	0	#N/A
PB.82.1	-	GO:0001101,GO:0003674,GO:0003824,GO:0005215,GO:0005575,GO:0005623,GO:0005886,GO:0006810,GO:0006833,GO:0006950,GO:0008150,GO:0009414,GO:0009415,GO:0009628,GO:0010035,GO:0010148,GO:0015399,GO:0015405,GO:0016020,GO:0016021,GO:0016462,GO:0016787,GO:0016817,GO:0016818,GO:0016887,GO:0017111,GO:0022804,GO:0022857,GO:0031224,GO:0042044,GO:0042221,GO:0042623,GO:0042626,GO:0043492,GO:0044425,GO:0044464,GO:…	PREDICTED: Solanum tuberosum ABC transporter G family member 22-like (LOC102592336), mRNA	0	PREDICTED: ABC transporter G family member 22-like	0	ABC transporter, ATP-binding component [Rhodococcus jostii RHA1]	3.42e-19	Transporter, ABC superfamily (Breast cancer resistance protein)	2.62e-77	COG1131@1|root,KOG0061@2759|Eukaryota,37I5A@33090|Viridiplantae,3G73T@35493|Streptophyta,44G3P@71274|asterids	5.01e-162	ABC transporter G family member 22 OS=Arabidopsis thaliana OX=3702 GN=ABCG22 PE=1 SV=1	1.57e-116	ABC_tran & ABC2_membrane_7 & ABC2_membrane & ABC2_membrane_3
PB.82.2	-	GO:0001101,GO:0003674,GO:0003824,GO:0005215,GO:0005575,GO:0005623,GO:0005886,GO:0006810,GO:0006833,GO:0006950,GO:0008150,GO:0009414,GO:0009415,GO:0009628,GO:0010035,GO:0010148,GO:0015399,GO:0015405,GO:0016020,GO:0016021,GO:0016462,GO:0016787,GO:0016817,GO:0016818,GO:0016887,GO:0017111,GO:0022804,GO:0022857,GO:0031224,GO:0042044,GO:0042221,GO:0042623,GO:0042626,GO:0043492,GO:0044425,GO:0044464,GO:…	PREDICTED: Solanum tuberosum ABC transporter G family member 22-like (LOC102592336), mRNA	0	hypothetical protein H5410_000342	9.3e-121	multidrug ABC transporter ATPase [Parabacteroides distasonis ATCC 8503]	3.55e-11	Transporter, ABC superfamily (Breast cancer resistance protein)	4.11e-52	COG1131@1|root,KOG0061@2759|Eukaryota,37I5A@33090|Viridiplantae,3G73T@35493|Streptophyta,44G3P@71274|asterids	3.89e-105	ABC transporter G family member 27 OS=Arabidopsis thaliana OX=3702 GN=ABCG27 PE=2 SV=1	1.04e-84	ABC2_membrane & ABC2_membrane_3 & ABC2_membrane_7
PB.82.3	-	GO:0001101,GO:0003674,GO:0003824,GO:0005215,GO:0005575,GO:0005623,GO:0005886,GO:0006810,GO:0006833,GO:0006950,GO:0008150,GO:0009414,GO:0009415,GO:0009628,GO:0010035,GO:0010148,GO:0015399,GO:0015405,GO:0016020,GO:0016021,GO:0016462,GO:0016787,GO:0016817,GO:0016818,GO:0016887,GO:0017111,GO:0022804,GO:0022857,GO:0031224,GO:0042044,GO:0042221,GO:0042623,GO:0042626,GO:0043492,GO:0044425,GO:0044464,GO:…	PREDICTED: Solanum tuberosum ABC transporter G family member 22-like (LOC102592336), mRNA	0	hypothetical protein KY289_004016	0	#N/A	#N/A	Transporter, ABC superfamily (Breast cancer resistance protein)	1.12e-114	COG1131@1|root,KOG0061@2759|Eukaryota,37I5A@33090|Viridiplantae,3G73T@35493|Streptophyta,44G3P@71274|asterids	5.71e-190	ABC transporter G family member 22 OS=Arabidopsis thaliana OX=3702 GN=ABCG22 PE=1 SV=1	2.18e-145	ABC2_membrane_7 & ABC2_membrane
PB.82.4	-	GO:0001101,GO:0003674,GO:0003824,GO:0005215,GO:0005575,GO:0005623,GO:0005886,GO:0006810,GO:0006833,GO:0006950,GO:0008150,GO:0009414,GO:0009415,GO:0009628,GO:0010035,GO:0010148,GO:0015399,GO:0015405,GO:0016020,GO:0016021,GO:0016462,GO:0016787,GO:0016817,GO:0016818,GO:0016887,GO:0017111,GO:0022804,GO:0022857,GO:0031224,GO:0042044,GO:0042221,GO:0042623,GO:0042626,GO:0043492,GO:0044425,GO:0044464,GO:…	PREDICTED: Solanum tuberosum ABC transporter G family member 22-like (LOC102592336), mRNA	0	hypothetical protein KY289_004016	0	hypothetical protein SCE1572_15050 [Sorangium cellulosum So0157-2]	3.71e-42	Transporter, ABC superfamily (Breast cancer resistance protein)	0	COG1131@1|root,KOG0061@2759|Eukaryota,37I5A@33090|Viridiplantae,3G73T@35493|Streptophyta,44G3P@71274|asterids	0.0	ABC transporter G family member 22 OS=Arabidopsis thaliana OX=3702 GN=ABCG22 PE=1 SV=1	0	ABC_tran & ABC2_membrane_7 & ABC2_membrane
PB.82.5	-	GO:0001101,GO:0003674,GO:0003824,GO:0005215,GO:0005575,GO:0005623,GO:0005886,GO:0006810,GO:0006833,GO:0006950,GO:0008150,GO:0009414,GO:0009415,GO:0009628,GO:0010035,GO:0010148,GO:0015399,GO:0015405,GO:0016020,GO:0016021,GO:0016462,GO:0016787,GO:0016817,GO:0016818,GO:0016887,GO:0017111,GO:0022804,GO:0022857,GO:0031224,GO:0042044,GO:0042221,GO:0042623,GO:0042626,GO:0043492,GO:0044425,GO:0044464,GO:…	PREDICTED: Solanum tuberosum ABC transporter G family member 22-like (LOC102592336), mRNA	0	hypothetical protein KY289_004016	0	hypothetical protein SCE1572_15050 [Sorangium cellulosum So0157-2]	2.2e-42	Transporter, ABC superfamily (Breast cancer resistance protein)	4.62e-115	COG1131@1|root,KOG0061@2759|Eukaryota,37I5A@33090|Viridiplantae,3G73T@35493|Streptophyta,44G3P@71274|asterids	2.01e-190	ABC transporter G family member 22 OS=Arabidopsis thaliana OX=3702 GN=ABCG22 PE=1 SV=1	8.51e-146	ABC2_membrane & ABC_tran & ABC2_membrane_7
PB.82.6	-	GO:0001101,GO:0003674,GO:0003824,GO:0005215,GO:0005575,GO:0005623,GO:0005886,GO:0006810,GO:0006833,GO:0006950,GO:0008150,GO:0009414,GO:0009415,GO:0009628,GO:0010035,GO:0010148,GO:0015399,GO:0015405,GO:0016020,GO:0016021,GO:0016462,GO:0016787,GO:0016817,GO:0016818,GO:0016887,GO:0017111,GO:0022804,GO:0022857,GO:0031224,GO:0042044,GO:0042221,GO:0042623,GO:0042626,GO:0043492,GO:0044425,GO:0044464,GO:…	PREDICTED: Solanum tuberosum ABC transporter G family member 22-like (LOC102592336), mRNA	0	hypothetical protein KY289_004016	0	ABC transporter ATP-binding protein [Microcystis aeruginosa NIES-843]	5.28e-22	Transporter, ABC superfamily (Breast cancer resistance protein)	0	COG1131@1|root,KOG0061@2759|Eukaryota,37I5A@33090|Viridiplantae,3G73T@35493|Streptophyta,44G3P@71274|asterids	0.0	ABC transporter G family member 22 OS=Arabidopsis thaliana OX=3702 GN=ABCG22 PE=1 SV=1	0	ABC2_membrane_7 & ABC2_membrane & ABC2_membrane_3 & ABC_tran
PB.82.7	-	GO:0001101,GO:0003674,GO:0003824,GO:0005215,GO:0005575,GO:0005623,GO:0005886,GO:0006810,GO:0006833,GO:0006950,GO:0008150,GO:0009414,GO:0009415,GO:0009628,GO:0010035,GO:0010148,GO:0015399,GO:0015405,GO:0016020,GO:0016021,GO:0016462,GO:0016787,GO:0016817,GO:0016818,GO:0016887,GO:0017111,GO:0022804,GO:0022857,GO:0031224,GO:0042044,GO:0042221,GO:0042623,GO:0042626,GO:0043492,GO:0044425,GO:0044464,GO:…	PREDICTED: Solanum tuberosum ABC transporter G family member 22-like (LOC102592336), mRNA	0	PREDICTED: ABC transporter G family member 22-like	0	hypothetical protein SCE1572_15050 [Sorangium cellulosum So0157-2]	2.86e-42	Transporter, ABC superfamily (Breast cancer resistance protein)	0	COG1131@1|root,KOG0061@2759|Eukaryota,37I5A@33090|Viridiplantae,3G73T@35493|Streptophyta,44G3P@71274|asterids	0.0	ABC transporter G family member 22 OS=Arabidopsis thaliana OX=3702 GN=ABCG22 PE=1 SV=1	0	ABC_tran & ABC2_membrane_7 & ABC2_membrane
PB.82.8	-	GO:0001101,GO:0003674,GO:0003824,GO:0005215,GO:0005575,GO:0005623,GO:0005886,GO:0006810,GO:0006833,GO:0006950,GO:0008150,GO:0009414,GO:0009415,GO:0009628,GO:0010035,GO:0010148,GO:0015399,GO:0015405,GO:0016020,GO:0016021,GO:0016462,GO:0016787,GO:0016817,GO:0016818,GO:0016887,GO:0017111,GO:0022804,GO:0022857,GO:0031224,GO:0042044,GO:0042221,GO:0042623,GO:0042626,GO:0043492,GO:0044425,GO:0044464,GO:…	PREDICTED: Solanum tuberosum ABC transporter G family member 22-like (LOC102592336), mRNA	0	hypothetical protein KY289_004016	0	hypothetical protein SCE1572_15050 [Sorangium cellulosum So0157-2]	3.14e-42	Transporter, ABC superfamily (Breast cancer resistance protein)	0	COG1131@1|root,KOG0061@2759|Eukaryota,37I5A@33090|Viridiplantae,3G73T@35493|Streptophyta,44G3P@71274|asterids	0.0	ABC transporter G family member 22 OS=Arabidopsis thaliana OX=3702 GN=ABCG22 PE=1 SV=1	0	ABC_tran & ABC2_membrane_7 & ABC2_membrane
PB.82.9	-	GO:0001101,GO:0003674,GO:0003824,GO:0005215,GO:0005575,GO:0005623,GO:0005886,GO:0006810,GO:0006833,GO:0006950,GO:0008150,GO:0009414,GO:0009415,GO:0009628,GO:0010035,GO:0010148,GO:0015399,GO:0015405,GO:0016020,GO:0016021,GO:0016462,GO:0016787,GO:0016817,GO:0016818,GO:0016887,GO:0017111,GO:0022804,GO:0022857,GO:0031224,GO:0042044,GO:0042221,GO:0042623,GO:0042626,GO:0043492,GO:0044425,GO:0044464,GO:…	PREDICTED: Solanum tuberosum ABC transporter G family member 22-like (LOC102592336), mRNA	0	PREDICTED: ABC transporter G family member 22-like	0	hypothetical protein SCE1572_15050 [Sorangium cellulosum So0157-2]	2.86e-42	Transporter, ABC superfamily (Breast cancer resistance protein)	0	COG1131@1|root,KOG0061@2759|Eukaryota,37I5A@33090|Viridiplantae,3G73T@35493|Streptophyta,44G3P@71274|asterids	0.0	ABC transporter G family member 22 OS=Arabidopsis thaliana OX=3702 GN=ABCG22 PE=1 SV=1	0	ABC_tran & ABC2_membrane_7 & ABC2_membrane
PB.82.10	-	GO:0001101,GO:0003674,GO:0003824,GO:0005215,GO:0005575,GO:0005623,GO:0005886,GO:0006810,GO:0006833,GO:0006950,GO:0008150,GO:0009414,GO:0009415,GO:0009628,GO:0010035,GO:0010148,GO:0015399,GO:0015405,GO:0016020,GO:0016021,GO:0016462,GO:0016787,GO:0016817,GO:0016818,GO:0016887,GO:0017111,GO:0022804,GO:0022857,GO:0031224,GO:0042044,GO:0042221,GO:0042623,GO:0042626,GO:0043492,GO:0044425,GO:0044464,GO:…	PREDICTED: Solanum tuberosum ABC transporter G family member 22-like (LOC102592336), mRNA	0	hypothetical protein KY289_004016	0	hypothetical protein SCE1572_15050 [Sorangium cellulosum So0157-2]	1.77e-42	Transporter, ABC superfamily (Breast cancer resistance protein)	0	COG1131@1|root,KOG0061@2759|Eukaryota,37I5A@33090|Viridiplantae,3G73T@35493|Streptophyta,44G3P@71274|asterids	0.0	ABC transporter G family member 22 OS=Arabidopsis thaliana OX=3702 GN=ABCG22 PE=1 SV=1	0	ABC_tran & ABC2_membrane_7 & ABC2_membrane
PB.82.11	-	GO:0001101,GO:0003674,GO:0003824,GO:0005215,GO:0005575,GO:0005623,GO:0005886,GO:0006810,GO:0006833,GO:0006950,GO:0008150,GO:0009414,GO:0009415,GO:0009628,GO:0010035,GO:0010148,GO:0015399,GO:0015405,GO:0016020,GO:0016021,GO:0016462,GO:0016787,GO:0016817,GO:0016818,GO:0016887,GO:0017111,GO:0022804,GO:0022857,GO:0031224,GO:0042044,GO:0042221,GO:0042623,GO:0042626,GO:0043492,GO:0044425,GO:0044464,GO:…	PREDICTED: Solanum tuberosum ABC transporter G family member 22-like (LOC102592336), mRNA	0	hypothetical protein KY289_004016	0	FHA modulated ABC efflux pump ATPase/integral membrane protein [Chroococcidiopsis thermalis PCC 7203]	3.51e-33	Transporter, ABC superfamily (Breast cancer resistance protein)	0	COG1131@1|root,KOG0061@2759|Eukaryota,37I5A@33090|Viridiplantae,3G73T@35493|Streptophyta,44G3P@71274|asterids	0.0	ABC transporter G family member 22 OS=Arabidopsis thaliana OX=3702 GN=ABCG22 PE=1 SV=1	0	ABC_tran & ABC2_membrane_7 & ABC2_membrane
PB.82.12	-	GO:0001101,GO:0003674,GO:0003824,GO:0005215,GO:0005575,GO:0005623,GO:0005886,GO:0006810,GO:0006833,GO:0006950,GO:0008150,GO:0009414,GO:0009415,GO:0009628,GO:0010035,GO:0010148,GO:0015399,GO:0015405,GO:0016020,GO:0016021,GO:0016462,GO:0016787,GO:0016817,GO:0016818,GO:0016887,GO:0017111,GO:0022804,GO:0022857,GO:0031224,GO:0042044,GO:0042221,GO:0042623,GO:0042626,GO:0043492,GO:0044425,GO:0044464,GO:…	PREDICTED: Solanum tuberosum ABC transporter G family member 22-like (LOC102592336), mRNA	0	PREDICTED: ABC transporter G family member 22-like	0	hypothetical protein SCE1572_15050 [Sorangium cellulosum So0157-2]	2.26e-42	Transporter, ABC superfamily (Breast cancer resistance protein)	0	COG1131@1|root,KOG0061@2759|Eukaryota,37I5A@33090|Viridiplantae,3G73T@35493|Streptophyta,44G3P@71274|asterids	0.0	ABC transporter G family member 22 OS=Arabidopsis thaliana OX=3702 GN=ABCG22 PE=1 SV=1	0	ABC_tran & ABC2_membrane_7 & ABC2_membrane
PB.82.13	-	GO:0001101,GO:0003674,GO:0003824,GO:0005215,GO:0005575,GO:0005623,GO:0005886,GO:0006810,GO:0006833,GO:0006950,GO:0008150,GO:0009414,GO:0009415,GO:0009628,GO:0010035,GO:0010148,GO:0015399,GO:0015405,GO:0016020,GO:0016021,GO:0016462,GO:0016787,GO:0016817,GO:0016818,GO:0016887,GO:0017111,GO:0022804,GO:0022857,GO:0031224,GO:0042044,GO:0042221,GO:0042623,GO:0042626,GO:0043492,GO:0044425,GO:0044464,GO:…	PREDICTED: Solanum tuberosum ABC transporter G family member 22-like (LOC102592336), mRNA	0	hypothetical protein KY289_004016	0	ABC transporter [Marivirga tractuosa DSM 4126]	1.37e-24	Transporter, ABC superfamily (Breast cancer resistance protein)	0	COG1131@1|root,KOG0061@2759|Eukaryota,37I5A@33090|Viridiplantae,3G73T@35493|Streptophyta,44G3P@71274|asterids	0.0	ABC transporter G family member 22 OS=Arabidopsis thaliana OX=3702 GN=ABCG22 PE=1 SV=1	0	ABC_tran & ABC2_membrane_7 & ABC2_membrane
PB.82.14	-	GO:0001101,GO:0003674,GO:0003824,GO:0005215,GO:0005575,GO:0005623,GO:0005886,GO:0006810,GO:0006833,GO:0006950,GO:0008150,GO:0009414,GO:0009415,GO:0009628,GO:0010035,GO:0010148,GO:0015399,GO:0015405,GO:0016020,GO:0016021,GO:0016462,GO:0016787,GO:0016817,GO:0016818,GO:0016887,GO:0017111,GO:0022804,GO:0022857,GO:0031224,GO:0042044,GO:0042221,GO:0042623,GO:0042626,GO:0043492,GO:0044425,GO:0044464,GO:…	PREDICTED: Solanum tuberosum ABC transporter G family member 22-like (LOC102592336), mRNA	0	hypothetical protein KY289_004016	0	ABC transporter ATP-binding protein [Microcystis aeruginosa NIES-843]	4.81e-17	Transporter, ABC superfamily (Breast cancer resistance protein)	0	COG1131@1|root,KOG0061@2759|Eukaryota,37I5A@33090|Viridiplantae,3G73T@35493|Streptophyta,44G3P@71274|asterids	2.33e-307	ABC transporter G family member 22 OS=Arabidopsis thaliana OX=3702 GN=ABCG22 PE=1 SV=1	0	ABC2_membrane_7 & ABC2_membrane & ABC2_membrane_3
PB.82.15	-	GO:0001101,GO:0003674,GO:0003824,GO:0005215,GO:0005575,GO:0005623,GO:0005886,GO:0006810,GO:0006833,GO:0006950,GO:0008150,GO:0009414,GO:0009415,GO:0009628,GO:0010035,GO:0010148,GO:0015399,GO:0015405,GO:0016020,GO:0016021,GO:0016462,GO:0016787,GO:0016817,GO:0016818,GO:0016887,GO:0017111,GO:0022804,GO:0022857,GO:0031224,GO:0042044,GO:0042221,GO:0042623,GO:0042626,GO:0043492,GO:0044425,GO:0044464,GO:…	PREDICTED: Solanum tuberosum ABC transporter G family member 22-like (LOC102592336), mRNA	0	PREDICTED: ABC transporter G family member 22-like	0	hypothetical protein SCE1572_15050 [Sorangium cellulosum So0157-2]	2.86e-42	Transporter, ABC superfamily (Breast cancer resistance protein)	0	COG1131@1|root,KOG0061@2759|Eukaryota,37I5A@33090|Viridiplantae,3G73T@35493|Streptophyta,44G3P@71274|asterids	0.0	ABC transporter G family member 22 OS=Arabidopsis thaliana OX=3702 GN=ABCG22 PE=1 SV=1	0	ABC_tran & ABC2_membrane_7 & ABC2_membrane
PB.82.16	-	GO:0001101,GO:0003674,GO:0003824,GO:0005215,GO:0005575,GO:0005623,GO:0005886,GO:0006810,GO:0006833,GO:0006950,GO:0008150,GO:0009414,GO:0009415,GO:0009628,GO:0010035,GO:0010148,GO:0015399,GO:0015405,GO:0016020,GO:0016021,GO:0016462,GO:0016787,GO:0016817,GO:0016818,GO:0016887,GO:0017111,GO:0022804,GO:0022857,GO:0031224,GO:0042044,GO:0042221,GO:0042623,GO:0042626,GO:0043492,GO:0044425,GO:0044464,GO:…	PREDICTED: Solanum tuberosum ABC transporter G family member 22-like (LOC102592336), mRNA	0	PREDICTED: ABC transporter G family member 22-like	0	hypothetical protein SCE1572_15050 [Sorangium cellulosum So0157-2]	2.86e-42	Transporter, ABC superfamily (Breast cancer resistance protein)	0	COG1131@1|root,KOG0061@2759|Eukaryota,37I5A@33090|Viridiplantae,3G73T@35493|Streptophyta,44G3P@71274|asterids	0.0	ABC transporter G family member 22 OS=Arabidopsis thaliana OX=3702 GN=ABCG22 PE=1 SV=1	0	ABC_tran & ABC2_membrane_7 & ABC2_membrane
PB.82.17	-	GO:0001101,GO:0003674,GO:0003824,GO:0005215,GO:0005575,GO:0005623,GO:0005886,GO:0006810,GO:0006833,GO:0006950,GO:0008150,GO:0009414,GO:0009415,GO:0009628,GO:0010035,GO:0010148,GO:0015399,GO:0015405,GO:0016020,GO:0016021,GO:0016462,GO:0016787,GO:0016817,GO:0016818,GO:0016887,GO:0017111,GO:0022804,GO:0022857,GO:0031224,GO:0042044,GO:0042221,GO:0042623,GO:0042626,GO:0043492,GO:0044425,GO:0044464,GO:…	PREDICTED: Solanum tuberosum ABC transporter G family member 22-like (LOC102592336), mRNA	0	hypothetical protein KY289_004016	0	hypothetical protein SCE1572_15050 [Sorangium cellulosum So0157-2]	2.65e-42	Transporter, ABC superfamily (Breast cancer resistance protein)	0	COG1131@1|root,KOG0061@2759|Eukaryota,37I5A@33090|Viridiplantae,3G73T@35493|Streptophyta,44G3P@71274|asterids	0.0	ABC transporter G family member 22 OS=Arabidopsis thaliana OX=3702 GN=ABCG22 PE=1 SV=1	0	ABC_tran & ABC2_membrane_7 & ABC2_membrane
PB.82.18	-	GO:0001101,GO:0003674,GO:0003824,GO:0005215,GO:0005575,GO:0005623,GO:0005886,GO:0006810,GO:0006833,GO:0006950,GO:0008150,GO:0009414,GO:0009415,GO:0009628,GO:0010035,GO:0010148,GO:0015399,GO:0015405,GO:0016020,GO:0016021,GO:0016462,GO:0016787,GO:0016817,GO:0016818,GO:0016887,GO:0017111,GO:0022804,GO:0022857,GO:0031224,GO:0042044,GO:0042221,GO:0042623,GO:0042626,GO:0043492,GO:0044425,GO:0044464,GO:…	PREDICTED: Solanum tuberosum ABC transporter G family member 22-like (LOC102592336), mRNA	0	PREDICTED: ABC transporter G family member 22-like	0	ABC transporter, ATP-binding component [Rhodococcus jostii RHA1]	3.79e-19	Transporter, ABC superfamily (Breast cancer resistance protein)	2.73e-77	COG1131@1|root,KOG0061@2759|Eukaryota,37I5A@33090|Viridiplantae,3G73T@35493|Streptophyta,44G3P@71274|asterids	5.01e-162	ABC transporter G family member 22 OS=Arabidopsis thaliana OX=3702 GN=ABCG22 PE=1 SV=1	2.44e-116	ABC_tran & ABC2_membrane_7 & ABC2_membrane & ABC2_membrane_3
PB.82.19	-	GO:0001101,GO:0003674,GO:0003824,GO:0005215,GO:0005575,GO:0005623,GO:0005886,GO:0006810,GO:0006833,GO:0006950,GO:0008150,GO:0009414,GO:0009415,GO:0009628,GO:0010035,GO:0010148,GO:0015399,GO:0015405,GO:0016020,GO:0016021,GO:0016462,GO:0016787,GO:0016817,GO:0016818,GO:0016887,GO:0017111,GO:0022804,GO:0022857,GO:0031224,GO:0042044,GO:0042221,GO:0042623,GO:0042626,GO:0043492,GO:0044425,GO:0044464,GO:…	PREDICTED: Solanum tuberosum ABC transporter G family member 22-like (LOC102592336), mRNA	0	hypothetical protein H5410_000343	4.89e-170	ABC transporter, ATP-binding component [Rhodococcus jostii RHA1]	1.91e-19	Transporter, ABC superfamily (Breast cancer resistance protein)	1.59e-77	COG1131@1|root,KOG0061@2759|Eukaryota,37I5A@33090|Viridiplantae,3G73T@35493|Streptophyta,44G3P@71274|asterids	1.29e-155	ABC transporter G family member 22 OS=Arabidopsis thaliana OX=3702 GN=ABCG22 PE=1 SV=1	1.73e-112	ABC_tran & ABC2_membrane_7 & ABC2_membrane & ABC2_membrane_3
PB.82.20	-	GO:0001101,GO:0003674,GO:0003824,GO:0005215,GO:0005575,GO:0005623,GO:0005886,GO:0006810,GO:0006833,GO:0006950,GO:0008150,GO:0009414,GO:0009415,GO:0009628,GO:0010035,GO:0010148,GO:0015399,GO:0015405,GO:0016020,GO:0016021,GO:0016462,GO:0016787,GO:0016817,GO:0016818,GO:0016887,GO:0017111,GO:0022804,GO:0022857,GO:0031224,GO:0042044,GO:0042221,GO:0042623,GO:0042626,GO:0043492,GO:0044425,GO:0044464,GO:…	PREDICTED: Solanum tuberosum ABC transporter G family member 22-like (LOC102592336), mRNA	0	hypothetical protein KY289_004016	0	#N/A	#N/A	Transporter, ABC superfamily (Breast cancer resistance protein)	7.91e-170	COG1131@1|root,KOG0061@2759|Eukaryota,37I5A@33090|Viridiplantae,3G73T@35493|Streptophyta,44G3P@71274|asterids	1.1e-247	ABC transporter G family member 22 OS=Arabidopsis thaliana OX=3702 GN=ABCG22 PE=1 SV=1	0	ABC2_membrane_7 & ABC2_membrane
PB.82.21	-	GO:0001101,GO:0003674,GO:0003824,GO:0005215,GO:0005575,GO:0005623,GO:0005886,GO:0006810,GO:0006833,GO:0006950,GO:0008150,GO:0009414,GO:0009415,GO:0009628,GO:0010035,GO:0010148,GO:0015399,GO:0015405,GO:0016020,GO:0016021,GO:0016462,GO:0016787,GO:0016817,GO:0016818,GO:0016887,GO:0017111,GO:0022804,GO:0022857,GO:0031224,GO:0042044,GO:0042221,GO:0042623,GO:0042626,GO:0043492,GO:0044425,GO:0044464,GO:…	PREDICTED: Solanum tuberosum ABC transporter G family member 22-like (LOC102592336), mRNA	0	hypothetical protein KY289_004016	0	hypothetical protein SCE1572_15050 [Sorangium cellulosum So0157-2]	2.53e-42	Transporter, ABC superfamily (Breast cancer resistance protein)	0	COG1131@1|root,KOG0061@2759|Eukaryota,37I5A@33090|Viridiplantae,3G73T@35493|Streptophyta,44G3P@71274|asterids	0.0	ABC transporter G family member 22 OS=Arabidopsis thaliana OX=3702 GN=ABCG22 PE=1 SV=1	0	ABC_tran & ABC2_membrane_7 & ABC2_membrane
PB.82.22	-	GO:0001101,GO:0003674,GO:0003824,GO:0005215,GO:0005575,GO:0005623,GO:0005886,GO:0006810,GO:0006833,GO:0006950,GO:0008150,GO:0009414,GO:0009415,GO:0009628,GO:0010035,GO:0010148,GO:0015399,GO:0015405,GO:0016020,GO:0016021,GO:0016462,GO:0016787,GO:0016817,GO:0016818,GO:0016887,GO:0017111,GO:0022804,GO:0022857,GO:0031224,GO:0042044,GO:0042221,GO:0042623,GO:0042626,GO:0043492,GO:0044425,GO:0044464,GO:…	PREDICTED: Solanum tuberosum ABC transporter G family member 22-like (LOC102592336), mRNA	0	PREDICTED: ABC transporter G family member 22-like	0	ABC transporter, ATP-binding component [Rhodococcus jostii RHA1]	3.42e-19	Transporter, ABC superfamily (Breast cancer resistance protein)	2.62e-77	COG1131@1|root,KOG0061@2759|Eukaryota,37I5A@33090|Viridiplantae,3G73T@35493|Streptophyta,44G3P@71274|asterids	5.01e-162	ABC transporter G family member 22 OS=Arabidopsis thaliana OX=3702 GN=ABCG22 PE=1 SV=1	1.57e-116	ABC_tran & ABC2_membrane_7 & ABC2_membrane
PB.82.23	-	GO:0001101,GO:0003674,GO:0003824,GO:0005215,GO:0005575,GO:0005623,GO:0005886,GO:0006810,GO:0006833,GO:0006950,GO:0008150,GO:0009414,GO:0009415,GO:0009628,GO:0010035,GO:0010148,GO:0015399,GO:0015405,GO:0016020,GO:0016021,GO:0016462,GO:0016787,GO:0016817,GO:0016818,GO:0016887,GO:0017111,GO:0022804,GO:0022857,GO:0031224,GO:0042044,GO:0042221,GO:0042623,GO:0042626,GO:0043492,GO:0044425,GO:0044464,GO:…	PREDICTED: Solanum tuberosum ABC transporter G family member 22-like (LOC102592336), mRNA	0	hypothetical protein KY289_004016	0	ABC transporter ATP-binding protein [Microcystis aeruginosa NIES-843]	5.28e-22	Transporter, ABC superfamily (Breast cancer resistance protein)	0	COG1131@1|root,KOG0061@2759|Eukaryota,37I5A@33090|Viridiplantae,3G73T@35493|Streptophyta,44G3P@71274|asterids	0.0	ABC transporter G family member 22 OS=Arabidopsis thaliana OX=3702 GN=ABCG22 PE=1 SV=1	0	ABC2_membrane_7 & ABC2_membrane & ABC2_membrane_3
PB.82.24	-	GO:0001101,GO:0003674,GO:0003824,GO:0005215,GO:0005575,GO:0005623,GO:0005886,GO:0006810,GO:0006833,GO:0006950,GO:0008150,GO:0009414,GO:0009415,GO:0009628,GO:0010035,GO:0010148,GO:0015399,GO:0015405,GO:0016020,GO:0016021,GO:0016462,GO:0016787,GO:0016817,GO:0016818,GO:0016887,GO:0017111,GO:0022804,GO:0022857,GO:0031224,GO:0042044,GO:0042221,GO:0042623,GO:0042626,GO:0043492,GO:0044425,GO:0044464,GO:…	PREDICTED: Solanum tuberosum ABC transporter G family member 22-like (LOC102592336), mRNA	0	PREDICTED: ABC transporter G family member 22-like	0	hypothetical protein SCE1572_15050 [Sorangium cellulosum So0157-2]	2.06e-42	Transporter, ABC superfamily (Breast cancer resistance protein)	0	COG1131@1|root,KOG0061@2759|Eukaryota,37I5A@33090|Viridiplantae,3G73T@35493|Streptophyta,44G3P@71274|asterids	0.0	ABC transporter G family member 22 OS=Arabidopsis thaliana OX=3702 GN=ABCG22 PE=1 SV=1	0	ABC_tran & ABC2_membrane_7 & ABC2_membrane
PB.82.25	-	GO:0001101,GO:0003674,GO:0003824,GO:0005215,GO:0005575,GO:0005623,GO:0005886,GO:0006810,GO:0006833,GO:0006950,GO:0008150,GO:0009414,GO:0009415,GO:0009628,GO:0010035,GO:0010148,GO:0015399,GO:0015405,GO:0016020,GO:0016021,GO:0016462,GO:0016787,GO:0016817,GO:0016818,GO:0016887,GO:0017111,GO:0022804,GO:0022857,GO:0031224,GO:0042044,GO:0042221,GO:0042623,GO:0042626,GO:0043492,GO:0044425,GO:0044464,GO:…	PREDICTED: Solanum tuberosum ABC transporter G family member 22-like (LOC102592336), mRNA	0	hypothetical protein KY289_004016	0	#N/A	#N/A	Transporter, ABC superfamily (Breast cancer resistance protein)	7.91e-170	COG1131@1|root,KOG0061@2759|Eukaryota,37I5A@33090|Viridiplantae,3G73T@35493|Streptophyta,44G3P@71274|asterids	1.1e-247	ABC transporter G family member 22 OS=Arabidopsis thaliana OX=3702 GN=ABCG22 PE=1 SV=1	0	ABC2_membrane_7 & ABC2_membrane
PB.82.26	-	GO:0001101,GO:0003674,GO:0003824,GO:0005215,GO:0005575,GO:0005623,GO:0005886,GO:0006810,GO:0006833,GO:0006950,GO:0008150,GO:0009414,GO:0009415,GO:0009628,GO:0010035,GO:0010148,GO:0015399,GO:0015405,GO:0016020,GO:0016021,GO:0016462,GO:0016787,GO:0016817,GO:0016818,GO:0016887,GO:0017111,GO:0022804,GO:0022857,GO:0031224,GO:0042044,GO:0042221,GO:0042623,GO:0042626,GO:0043492,GO:0044425,GO:0044464,GO:…	PREDICTED: Solanum tuberosum ABC transporter G family member 22-like (LOC102592336), mRNA	0	hypothetical protein KY289_004016	0	hypothetical protein SCE1572_15050 [Sorangium cellulosum So0157-2]	2e-42	Transporter, ABC superfamily (Breast cancer resistance protein)	4.62e-115	COG1131@1|root,KOG0061@2759|Eukaryota,37I5A@33090|Viridiplantae,3G73T@35493|Streptophyta,44G3P@71274|asterids	2.01e-190	ABC transporter G family member 22 OS=Arabidopsis thaliana OX=3702 GN=ABCG22 PE=1 SV=1	8.51e-146	ABC2_membrane & ABC_tran & ABC2_membrane_7
PB.82.27	-	GO:0001101,GO:0003674,GO:0003824,GO:0005215,GO:0005575,GO:0005623,GO:0005886,GO:0006810,GO:0006833,GO:0006950,GO:0008150,GO:0009414,GO:0009415,GO:0009628,GO:0010035,GO:0010148,GO:0015399,GO:0015405,GO:0016020,GO:0016021,GO:0016462,GO:0016787,GO:0016817,GO:0016818,GO:0016887,GO:0017111,GO:0022804,GO:0022857,GO:0031224,GO:0042044,GO:0042221,GO:0042623,GO:0042626,GO:0043492,GO:0044425,GO:0044464,GO:…	PREDICTED: Solanum tuberosum ABC transporter G family member 22-like (LOC102592336), mRNA	0	hypothetical protein KY289_004016	0	multidrug ABC transporter ATPase [Flexibacter litoralis DSM 6794]	7.23e-27	Transporter, ABC superfamily (Breast cancer resistance protein)	4.62e-115	COG1131@1|root,KOG0061@2759|Eukaryota,37I5A@33090|Viridiplantae,3G73T@35493|Streptophyta,44G3P@71274|asterids	2.01e-190	ABC transporter G family member 22 OS=Arabidopsis thaliana OX=3702 GN=ABCG22 PE=1 SV=1	8.51e-146	ABC2_membrane & ABC_tran & ABC2_membrane_7
PB.82.28	-	GO:0001101,GO:0003674,GO:0003824,GO:0005215,GO:0005575,GO:0005623,GO:0005886,GO:0006810,GO:0006833,GO:0006950,GO:0008150,GO:0009414,GO:0009415,GO:0009628,GO:0010035,GO:0010148,GO:0015399,GO:0015405,GO:0016020,GO:0016021,GO:0016462,GO:0016787,GO:0016817,GO:0016818,GO:0016887,GO:0017111,GO:0022804,GO:0022857,GO:0031224,GO:0042044,GO:0042221,GO:0042623,GO:0042626,GO:0043492,GO:0044425,GO:0044464,GO:…	PREDICTED: Solanum tuberosum ABC transporter G family member 22-like (LOC102592336), mRNA	0	PREDICTED: ABC transporter G family member 22-like	0	ABC transporter, ATP-binding component [Rhodococcus jostii RHA1]	3.79e-19	Transporter, ABC superfamily (Breast cancer resistance protein)	2.73e-77	COG1131@1|root,KOG0061@2759|Eukaryota,37I5A@33090|Viridiplantae,3G73T@35493|Streptophyta,44G3P@71274|asterids	5.01e-162	ABC transporter G family member 22 OS=Arabidopsis thaliana OX=3702 GN=ABCG22 PE=1 SV=1	2.44e-116	ABC_tran & ABC2_membrane_7 & ABC2_membrane & ABC2_membrane_3
PB.82.29	-	GO:0001101,GO:0003674,GO:0003824,GO:0005215,GO:0005575,GO:0005623,GO:0005886,GO:0006810,GO:0006833,GO:0006950,GO:0008150,GO:0009414,GO:0009415,GO:0009628,GO:0010035,GO:0010148,GO:0015399,GO:0015405,GO:0016020,GO:0016021,GO:0016462,GO:0016787,GO:0016817,GO:0016818,GO:0016887,GO:0017111,GO:0022804,GO:0022857,GO:0031224,GO:0042044,GO:0042221,GO:0042623,GO:0042626,GO:0043492,GO:0044425,GO:0044464,GO:…	PREDICTED: Solanum tuberosum ABC transporter G family member 22-like (LOC102592336), mRNA	0	PREDICTED: ABC transporter G family member 22-like	0	hypothetical protein SCE1572_15050 [Sorangium cellulosum So0157-2]	2.88e-42	Transporter, ABC superfamily (Breast cancer resistance protein)	0	COG1131@1|root,KOG0061@2759|Eukaryota,37I5A@33090|Viridiplantae,3G73T@35493|Streptophyta,44G3P@71274|asterids	0.0	ABC transporter G family member 22 OS=Arabidopsis thaliana OX=3702 GN=ABCG22 PE=1 SV=1	0	ABC_tran & ABC2_membrane_7 & ABC2_membrane
PB.82.30	-	GO:0001101,GO:0003674,GO:0003824,GO:0005215,GO:0005575,GO:0005623,GO:0005886,GO:0006810,GO:0006833,GO:0006950,GO:0008150,GO:0009414,GO:0009415,GO:0009628,GO:0010035,GO:0010148,GO:0015399,GO:0015405,GO:0016020,GO:0016021,GO:0016462,GO:0016787,GO:0016817,GO:0016818,GO:0016887,GO:0017111,GO:0022804,GO:0022857,GO:0031224,GO:0042044,GO:0042221,GO:0042623,GO:0042626,GO:0043492,GO:0044425,GO:0044464,GO:…	PREDICTED: Solanum tuberosum ABC transporter G family member 22-like (LOC102592336), mRNA	0	hypothetical protein KY289_004016	0	FHA modulated ABC efflux pump with fused ATPase and integral membrane subunits [Chloroflexus aggregans DSM 9485]	9.6e-21	Transporter, ABC superfamily (Breast cancer resistance protein)	0	COG1131@1|root,KOG0061@2759|Eukaryota,37I5A@33090|Viridiplantae,3G73T@35493|Streptophyta,44G3P@71274|asterids	8.92e-314	ABC transporter G family member 22 OS=Arabidopsis thaliana OX=3702 GN=ABCG22 PE=1 SV=1	0	ABC2_membrane_7 & ABC2_membrane & ABC2_membrane_3
PB.82.31	-	GO:0001101,GO:0003674,GO:0003824,GO:0005215,GO:0005575,GO:0005623,GO:0005886,GO:0006810,GO:0006833,GO:0006950,GO:0008150,GO:0009414,GO:0009415,GO:0009628,GO:0010035,GO:0010148,GO:0015399,GO:0015405,GO:0016020,GO:0016021,GO:0016462,GO:0016787,GO:0016817,GO:0016818,GO:0016887,GO:0017111,GO:0022804,GO:0022857,GO:0031224,GO:0042044,GO:0042221,GO:0042623,GO:0042626,GO:0043492,GO:0044425,GO:0044464,GO:…	PREDICTED: Solanum tuberosum ABC transporter G family member 22-like (LOC102592336), mRNA	0	PREDICTED: ABC transporter G family member 22-like	0	hypothetical protein SCE1572_15050 [Sorangium cellulosum So0157-2]	2.88e-42	Transporter, ABC superfamily (Breast cancer resistance protein)	0	COG1131@1|root,KOG0061@2759|Eukaryota,37I5A@33090|Viridiplantae,3G73T@35493|Streptophyta,44G3P@71274|asterids	0.0	ABC transporter G family member 22 OS=Arabidopsis thaliana OX=3702 GN=ABCG22 PE=1 SV=1	0	ABC_tran & ABC2_membrane_7 & ABC2_membrane
PB.82.32	-	GO:0001101,GO:0003674,GO:0003824,GO:0005215,GO:0005575,GO:0005623,GO:0005886,GO:0006810,GO:0006833,GO:0006950,GO:0008150,GO:0009414,GO:0009415,GO:0009628,GO:0010035,GO:0010148,GO:0015399,GO:0015405,GO:0016020,GO:0016021,GO:0016462,GO:0016787,GO:0016817,GO:0016818,GO:0016887,GO:0017111,GO:0022804,GO:0022857,GO:0031224,GO:0042044,GO:0042221,GO:0042623,GO:0042626,GO:0043492,GO:0044425,GO:0044464,GO:…	Solanum tuberosum cultivar MSH/14-112 chromosome 1	0	hypothetical protein H5410_000343	1.37e-80	#N/A	#N/A	#N/A	#N/A	COG1131@1|root,KOG0061@2759|Eukaryota,37I5A@33090|Viridiplantae,3G73T@35493|Streptophyta,4JJT1@91835|fabids	1.51e-36	ABC transporter G family member 22 OS=Arabidopsis thaliana OX=3702 GN=ABCG22 PE=1 SV=1	2.28e-29	#N/A
PB.83.1	ko:K14514	GO:0000160,GO:0003674,GO:0003676,GO:0003677,GO:0003700,GO:0005488,GO:0006355,GO:0007154,GO:0007165,GO:0008150,GO:0009719,GO:0009723,GO:0009725,GO:0009755,GO:0009873,GO:0009889,GO:0009987,GO:0010033,GO:0010035,GO:0010038,GO:0010039,GO:0010468,GO:0010556,GO:0019219,GO:0019222,GO:0023052,GO:0031323,GO:0031326,GO:0032870,GO:0035556,GO:0042221,GO:0042762,GO:0050789,GO:0050794,GO:0050896,GO:0051171,GO:…	PREDICTED: Solanum tuberosum ETHYLENE INSENSITIVE 3-like 3 protein (LOC102590311), mRNA	0	hypothetical protein H5410_000332	0	#N/A	#N/A	0	6.22e-91	2CCFI@1|root,2QQCD@2759|Eukaryota,37S37@33090|Viridiplantae,3GB42@35493|Streptophyta,44H1C@71274|asterids	0.0	ETHYLENE INSENSITIVE 3-like 3 protein OS=Arabidopsis thaliana OX=3702 GN=EIL3 PE=1 SV=1	7.43e-169	EIN3
PB.83.2	ko:K14514	GO:0000160,GO:0003674,GO:0003676,GO:0003677,GO:0003700,GO:0005488,GO:0006355,GO:0007154,GO:0007165,GO:0008150,GO:0009719,GO:0009723,GO:0009725,GO:0009755,GO:0009873,GO:0009889,GO:0009987,GO:0010033,GO:0010035,GO:0010038,GO:0010039,GO:0010468,GO:0010556,GO:0019219,GO:0019222,GO:0023052,GO:0031323,GO:0031326,GO:0032870,GO:0035556,GO:0042221,GO:0042762,GO:0050789,GO:0050794,GO:0050896,GO:0051171,GO:…	PREDICTED: Solanum tuberosum ETHYLENE INSENSITIVE 3-like 3 protein (LOC102590311), mRNA	0	hypothetical protein H5410_000332	0	#N/A	#N/A	0	6.22e-91	2CCFI@1|root,2QQCD@2759|Eukaryota,37S37@33090|Viridiplantae,3GB42@35493|Streptophyta,44H1C@71274|asterids	0.0	ETHYLENE INSENSITIVE 3-like 3 protein OS=Arabidopsis thaliana OX=3702 GN=EIL3 PE=1 SV=1	7.43e-169	EIN3
PB.83.3	ko:K14514	GO:0000160,GO:0003674,GO:0003676,GO:0003677,GO:0003700,GO:0005488,GO:0006355,GO:0007154,GO:0007165,GO:0008150,GO:0009719,GO:0009723,GO:0009725,GO:0009755,GO:0009873,GO:0009889,GO:0009987,GO:0010033,GO:0010035,GO:0010038,GO:0010039,GO:0010468,GO:0010556,GO:0019219,GO:0019222,GO:0023052,GO:0031323,GO:0031326,GO:0032870,GO:0035556,GO:0042221,GO:0042762,GO:0050789,GO:0050794,GO:0050896,GO:0051171,GO:…	PREDICTED: Solanum tuberosum ETHYLENE INSENSITIVE 3-like 3 protein (LOC102590311), mRNA	0	hypothetical protein H5410_000332	0	#N/A	#N/A	0	6.22e-91	2CCFI@1|root,2QQCD@2759|Eukaryota,37S37@33090|Viridiplantae,3GB42@35493|Streptophyta,44H1C@71274|asterids	0.0	ETHYLENE INSENSITIVE 3-like 3 protein OS=Arabidopsis thaliana OX=3702 GN=EIL3 PE=1 SV=1	7.43e-169	EIN3
PB.83.4	ko:K14514	GO:0000160,GO:0003674,GO:0003676,GO:0003677,GO:0003700,GO:0005488,GO:0006355,GO:0007154,GO:0007165,GO:0008150,GO:0009719,GO:0009723,GO:0009725,GO:0009755,GO:0009873,GO:0009889,GO:0009987,GO:0010033,GO:0010035,GO:0010038,GO:0010039,GO:0010468,GO:0010556,GO:0019219,GO:0019222,GO:0023052,GO:0031323,GO:0031326,GO:0032870,GO:0035556,GO:0042221,GO:0042762,GO:0050789,GO:0050794,GO:0050896,GO:0051171,GO:…	PREDICTED: Solanum tuberosum ETHYLENE INSENSITIVE 3-like 3 protein (LOC102590311), mRNA	0	hypothetical protein H5410_000332	0	#N/A	#N/A	0	4.98e-91	2CCFI@1|root,2QQCD@2759|Eukaryota,37S37@33090|Viridiplantae,3GB42@35493|Streptophyta,44H1C@71274|asterids	0.0	ETHYLENE INSENSITIVE 3-like 3 protein OS=Arabidopsis thaliana OX=3702 GN=EIL3 PE=1 SV=1	1.39e-168	EIN3
PB.83.5	ko:K14514	GO:0000160,GO:0003674,GO:0003676,GO:0003677,GO:0003700,GO:0005488,GO:0006355,GO:0007154,GO:0007165,GO:0008150,GO:0009719,GO:0009723,GO:0009725,GO:0009755,GO:0009873,GO:0009889,GO:0009987,GO:0010033,GO:0010035,GO:0010038,GO:0010039,GO:0010468,GO:0010556,GO:0019219,GO:0019222,GO:0023052,GO:0031323,GO:0031326,GO:0032870,GO:0035556,GO:0042221,GO:0042762,GO:0050789,GO:0050794,GO:0050896,GO:0051171,GO:…	PREDICTED: Solanum tuberosum ETHYLENE INSENSITIVE 3-like 3 protein (LOC102590311), mRNA	0	hypothetical protein H5410_000332	0	#N/A	#N/A	0	2.51e-90	2CCFI@1|root,2QQCD@2759|Eukaryota,37S37@33090|Viridiplantae,3GB42@35493|Streptophyta,44H1C@71274|asterids	0.0	ETHYLENE INSENSITIVE 3-like 3 protein OS=Arabidopsis thaliana OX=3702 GN=EIL3 PE=1 SV=1	6.85e-168	EIN3
PB.84.1	ko:K01265	GO:0005575,GO:0005622,GO:0005623,GO:0005737,GO:0006464,GO:0006807,GO:0008150,GO:0008152,GO:0009987,GO:0019538,GO:0031365,GO:0036211,GO:0043170,GO:0043412,GO:0044237,GO:0044238,GO:0044260,GO:0044267,GO:0044424,GO:0044464,GO:0071704,GO:1901564	PREDICTED: Solanum tuberosum methionine aminopeptidase 2B-like (LOC102594334), transcript variant X2, mRNA	0	PREDICTED: methionine aminopeptidase 2B-like	0	methionine aminopeptidase [Pyrococcus furiosus DSM 3638]	3.23e-55	#N/A	#N/A	COG0024@1|root,KOG2775@2759|Eukaryota,37JYE@33090|Viridiplantae,3GGCI@35493|Streptophyta,44E16@71274|asterids	2.75e-297	Methionine aminopeptidase 2B OS=Arabidopsis thaliana OX=3702 GN=MAP2B PE=2 SV=2	0	Peptidase_M24
PB.84.2	ko:K01265	GO:0005575,GO:0005622,GO:0005623,GO:0005737,GO:0006464,GO:0006807,GO:0008150,GO:0008152,GO:0009987,GO:0019538,GO:0031365,GO:0036211,GO:0043170,GO:0043412,GO:0044237,GO:0044238,GO:0044260,GO:0044267,GO:0044424,GO:0044464,GO:0071704,GO:1901564	PREDICTED: Solanum tuberosum methionine aminopeptidase 2B-like (LOC102594334), transcript variant X2, mRNA	0	PREDICTED: methionine aminopeptidase 2B-like	0	methionine aminopeptidase [Pyrococcus furiosus DSM 3638]	3.23e-55	#N/A	#N/A	COG0024@1|root,KOG2775@2759|Eukaryota,37JYE@33090|Viridiplantae,3GGCI@35493|Streptophyta,44E16@71274|asterids	2.75e-297	Methionine aminopeptidase 2B OS=Arabidopsis thaliana OX=3702 GN=MAP2B PE=2 SV=2	0	Peptidase_M24
PB.84.3	ko:K01265	GO:0005575,GO:0005622,GO:0005623,GO:0005737,GO:0006464,GO:0006807,GO:0008150,GO:0008152,GO:0009987,GO:0019538,GO:0031365,GO:0036211,GO:0043170,GO:0043412,GO:0044237,GO:0044238,GO:0044260,GO:0044267,GO:0044424,GO:0044464,GO:0071704,GO:1901564	PREDICTED: Solanum tuberosum methionine aminopeptidase 2B-like (LOC102594334), transcript variant X2, mRNA	0	PREDICTED: methionine aminopeptidase 2B-like	0	methionine aminopeptidase [Pyrococcus furiosus DSM 3638]	3.23e-55	#N/A	#N/A	COG0024@1|root,KOG2775@2759|Eukaryota,37JYE@33090|Viridiplantae,3GGCI@35493|Streptophyta,44E16@71274|asterids	2.75e-297	Methionine aminopeptidase 2B OS=Arabidopsis thaliana OX=3702 GN=MAP2B PE=2 SV=2	0	Peptidase_M24
PB.84.4	ko:K01265	GO:0005575,GO:0005622,GO:0005623,GO:0005737,GO:0006464,GO:0006807,GO:0008150,GO:0008152,GO:0009987,GO:0019538,GO:0031365,GO:0036211,GO:0043170,GO:0043412,GO:0044237,GO:0044238,GO:0044260,GO:0044267,GO:0044424,GO:0044464,GO:0071704,GO:1901564	PREDICTED: Solanum tuberosum methionine aminopeptidase 2B-like (LOC102594334), transcript variant X2, mRNA	0	PREDICTED: methionine aminopeptidase 2B-like	0	methionine aminopeptidase [Pyrococcus furiosus DSM 3638]	3.23e-55	#N/A	#N/A	COG0024@1|root,KOG2775@2759|Eukaryota,37JYE@33090|Viridiplantae,3GGCI@35493|Streptophyta,44E16@71274|asterids	2.75e-297	Methionine aminopeptidase 2B OS=Arabidopsis thaliana OX=3702 GN=MAP2B PE=2 SV=2	0	Peptidase_M24
PB.84.5	ko:K01265	GO:0005575,GO:0005622,GO:0005623,GO:0005737,GO:0006464,GO:0006807,GO:0008150,GO:0008152,GO:0009987,GO:0019538,GO:0031365,GO:0036211,GO:0043170,GO:0043412,GO:0044237,GO:0044238,GO:0044260,GO:0044267,GO:0044424,GO:0044464,GO:0071704,GO:1901564	PREDICTED: Solanum tuberosum methionine aminopeptidase 2B-like (LOC102594334), transcript variant X2, mRNA	0	PREDICTED: methionine aminopeptidase 2B-like	0	methionine aminopeptidase [Pyrococcus furiosus DSM 3638]	2.96e-55	#N/A	#N/A	COG0024@1|root,KOG2775@2759|Eukaryota,37JYE@33090|Viridiplantae,3GGCI@35493|Streptophyta,44E16@71274|asterids	1.92e-294	Methionine aminopeptidase 2B OS=Arabidopsis thaliana OX=3702 GN=MAP2B PE=2 SV=2	0	Peptidase_M24
PB.84.6	ko:K01265	GO:0005575,GO:0005622,GO:0005623,GO:0005737,GO:0006464,GO:0006807,GO:0008150,GO:0008152,GO:0009987,GO:0019538,GO:0031365,GO:0036211,GO:0043170,GO:0043412,GO:0044237,GO:0044238,GO:0044260,GO:0044267,GO:0044424,GO:0044464,GO:0071704,GO:1901564	PREDICTED: Solanum tuberosum methionine aminopeptidase 2B-like (LOC102594334), transcript variant X2, mRNA	0	PREDICTED: methionine aminopeptidase 2B-like	0	methionine aminopeptidase [Pyrococcus furiosus DSM 3638]	9.92e-57	#N/A	#N/A	COG0024@1|root,KOG2775@2759|Eukaryota,37JYE@33090|Viridiplantae,3GGCI@35493|Streptophyta,44E16@71274|asterids	4.53e-247	Methionine aminopeptidase 2B OS=Arabidopsis thaliana OX=3702 GN=MAP2B PE=2 SV=2	0	Peptidase_M24
PB.85.1	ko:K19043	GO:0000209,GO:0003674,GO:0003824,GO:0004842,GO:0005575,GO:0005623,GO:0005886,GO:0006464,GO:0006508,GO:0006511,GO:0006807,GO:0007275,GO:0008150,GO:0008152,GO:0009056,GO:0009057,GO:0009553,GO:0009555,GO:0009561,GO:0009987,GO:0010498,GO:0016020,GO:0016567,GO:0016740,GO:0019538,GO:0019787,GO:0019941,GO:0030163,GO:0032446,GO:0032501,GO:0032502,GO:0036211,GO:0043161,GO:0043170,GO:0043412,GO:0043632,GO:…	PREDICTED: Solanum tuberosum E3 ubiquitin-protein ligase RHF2A-like (LOC102594875), transcript variant X1, mRNA	0	hypothetical protein H5410_000352	0	#N/A	#N/A	FOG: Predicted E3 ubiquitin ligase	5.86e-10	KOG0800@1|root,KOG0800@2759|Eukaryota,37I45@33090|Viridiplantae,3GCSR@35493|Streptophyta,44SKV@71274|asterids	3.17e-222	E3 ubiquitin-protein ligase RHF2A OS=Arabidopsis thaliana OX=3702 GN=RHF2A PE=2 SV=1	8.09e-102	zf-rbx1 & zf-RING_2 & zf-RING_11 & zf-C3HC4_2 & zf-C3HC4
PB.85.2	ko:K19043	GO:0000209,GO:0003674,GO:0003824,GO:0004842,GO:0005575,GO:0005623,GO:0005886,GO:0006464,GO:0006508,GO:0006511,GO:0006807,GO:0007275,GO:0008150,GO:0008152,GO:0009056,GO:0009057,GO:0009553,GO:0009555,GO:0009561,GO:0009987,GO:0010498,GO:0016020,GO:0016567,GO:0016740,GO:0019538,GO:0019787,GO:0019941,GO:0030163,GO:0032446,GO:0032501,GO:0032502,GO:0036211,GO:0043161,GO:0043170,GO:0043412,GO:0043632,GO:…	PREDICTED: Solanum tuberosum E3 ubiquitin-protein ligase RHF2A-like (LOC102594875), transcript variant X1, mRNA	0	hypothetical protein H5410_000352	0	#N/A	#N/A	FOG: Predicted E3 ubiquitin ligase	5.19e-10	KOG0800@1|root,KOG0800@2759|Eukaryota,37I45@33090|Viridiplantae,3GCSR@35493|Streptophyta,44SKV@71274|asterids	2.34e-244	E3 ubiquitin-protein ligase RHF2A OS=Arabidopsis thaliana OX=3702 GN=RHF2A PE=2 SV=1	3.12e-115	zf-rbx1 & zf-RING_2 & zf-C3HC4_2 & zf-RING_11 & zf-C3HC4
PB.86.1	ko:K07024	GO:0003674,GO:0003824,GO:0016740,GO:0016757	PREDICTED: Solanum lycopersicum sucrose-phosphatase 1 (LOC778279), transcript variant X2, mRNA	0	hypothetical protein KY289_000175	0	sucrose phosphatase [Acaryochloris marina MBIC11017]	3.64e-58	#N/A	#N/A	COG0561@1|root,2QTVT@2759|Eukaryota,37JY7@33090|Viridiplantae,3G9FH@35493|Streptophyta,44D1K@71274|asterids	3.95e-285	Sucrose-phosphatase 1 OS=Nicotiana tabacum OX=4097 GN=SPP1 PE=2 SV=1	0	S6PP & Hydrolase_3 & S6PP_C
PB.86.2	ko:K07024	GO:0003674,GO:0003824,GO:0016740,GO:0016757	PREDICTED: Solanum lycopersicum sucrose-phosphatase 1 (LOC778279), transcript variant X2, mRNA	0	sucrose-phosphatase 1 isoform X2	0	sucrose phosphatase [Acaryochloris marina MBIC11017]	3.53e-58	#N/A	#N/A	COG0561@1|root,2QTVT@2759|Eukaryota,37JY7@33090|Viridiplantae,3G9FH@35493|Streptophyta,44D1K@71274|asterids	7.63e-307	Sucrose-phosphatase 1 OS=Nicotiana tabacum OX=4097 GN=SPP1 PE=2 SV=1	0	S6PP & Hydrolase_3 & S6PP_C
PB.87.1	-	GO:0005575,GO:0005622,GO:0005623,GO:0005737,GO:0005773,GO:0043226,GO:0043227,GO:0043229,GO:0043231,GO:0044424,GO:0044444,GO:0044464	PREDICTED: Solanum tuberosum fasciclin-like arabinogalactan protein 17 (LOC102595440), mRNA	0	PREDICTED: fasciclin-like arabinogalactan protein 17	0	secreted/surface protein with fasciclin-like repeats [Cylindrospermum stagnale PCC 7417]	1.14e-11	Fasciclin and related adhesion glycoproteins	0	COG2335@1|root,KOG1437@2759|Eukaryota,37P41@33090|Viridiplantae,3GEMN@35493|Streptophyta,44NB5@71274|asterids	5.21e-294	Fasciclin-like arabinogalactan protein 17 OS=Arabidopsis thaliana OX=3702 GN=FLA17 PE=2 SV=1	0	Fasciclin
PB.87.2	-	GO:0005575,GO:0005622,GO:0005623,GO:0005737,GO:0005773,GO:0043226,GO:0043227,GO:0043229,GO:0043231,GO:0044424,GO:0044444,GO:0044464	PREDICTED: Solanum tuberosum fasciclin-like arabinogalactan protein 17 (LOC102595440), mRNA	0	PREDICTED: fasciclin-like arabinogalactan protein 17	0	secreted/surface protein with fasciclin-like repeats [Cylindrospermum stagnale PCC 7417]	1.11e-11	Fasciclin and related adhesion glycoproteins	0	COG2335@1|root,KOG1437@2759|Eukaryota,37P41@33090|Viridiplantae,3GEMN@35493|Streptophyta,44NB5@71274|asterids	3.36e-290	Fasciclin-like arabinogalactan protein 17 OS=Arabidopsis thaliana OX=3702 GN=FLA17 PE=2 SV=1	0	Fasciclin
PB.87.3	-	GO:0005575,GO:0005622,GO:0005623,GO:0005737,GO:0005773,GO:0043226,GO:0043227,GO:0043229,GO:0043231,GO:0044424,GO:0044444,GO:0044464	PREDICTED: Solanum tuberosum fasciclin-like arabinogalactan protein 17 (LOC102595440), mRNA	1.07e-180	PREDICTED: fasciclin-like arabinogalactan protein 17	1.52e-77	#N/A	#N/A	Fasciclin and related adhesion glycoproteins	4.91e-45	COG2335@1|root,KOG1437@2759|Eukaryota,37P41@33090|Viridiplantae,3GEMN@35493|Streptophyta,44NB5@71274|asterids	5.19e-73	Fasciclin-like arabinogalactan protein 16 OS=Arabidopsis thaliana OX=3702 GN=FLA16 PE=2 SV=1	4.54e-57	#N/A
PB.88.1	-	-	PREDICTED: Solanum tuberosum uncharacterized LOC102595763 (LOC102595763), transcript variant X3, mRNA	0	hypothetical protein KY284_000185	0	#N/A	#N/A	0	3.54e-22	28KYJ@1|root,2QTFB@2759|Eukaryota,37SI0@33090|Viridiplantae,3GGKQ@35493|Streptophyta,44J6J@71274|asterids	4.3e-268	Protein WVD2-like 4 OS=Arabidopsis thaliana OX=3702 GN=WDL4 PE=1 SV=2	1.01e-57	TPX2
PB.88.2	-	-	PREDICTED: Solanum tuberosum uncharacterized LOC102595763 (LOC102595763), transcript variant X3, mRNA	0	hypothetical protein KY284_000185	0	#N/A	#N/A	0	4.12e-22	28KYJ@1|root,2QTFB@2759|Eukaryota,37SI0@33090|Viridiplantae,3GGKQ@35493|Streptophyta,44J6J@71274|asterids	4.3e-268	Protein WVD2-like 4 OS=Arabidopsis thaliana OX=3702 GN=WDL4 PE=1 SV=2	1.05e-57	TPX2
PB.89.1	-	GO:0003674,GO:0003676,GO:0003723,GO:0003824,GO:0004518,GO:0004519,GO:0005488,GO:0005575,GO:0005622,GO:0005623,GO:0006139,GO:0006725,GO:0006807,GO:0008150,GO:0008152,GO:0009451,GO:0009987,GO:0016070,GO:0016787,GO:0016788,GO:0034641,GO:0043170,GO:0043226,GO:0043227,GO:0043229,GO:0043231,GO:0043412,GO:0044237,GO:0044238,GO:0044424,GO:0044464,GO:0046483,GO:0071704,GO:0090304,GO:0090305,GO:0097159,GO:…	Solanum tuberosum cultivar Solyntus chromosome 1	0	hypothetical protein H5410_000359	0	#N/A	#N/A	FOG: PPR repeat	0	KOG4197@1|root,KOG4197@2759|Eukaryota,37S9D@33090|Viridiplantae,3GFAW@35493|Streptophyta,44E4Z@71274|asterids	0.0	Putative pentatricopeptide repeat-containing protein At5g06400, mitochondrial OS=Arabidopsis thaliana OX=3702 GN=At5g06400 PE=3 SV=1	0	PPR_2 & PPR_1 & PPR & PPR_3 & PPR_long
PB.90.1	-	-	PREDICTED: Solanum tuberosum uncharacterized LOC102596987 (LOC102596987), transcript variant X3, mRNA	0	hypothetical protein H5410_000361	0	#N/A	#N/A	0	9.4e-90	28NG8@1|root,2QV1V@2759|Eukaryota,37N09@33090|Viridiplantae,3GBNC@35493|Streptophyta,44PH2@71274|asterids	0.0	#N/A	#N/A	#N/A
PB.90.2	-	-	PREDICTED: Solanum tuberosum uncharacterized LOC102596987 (LOC102596987), transcript variant X3, mRNA	0	hypothetical protein H5410_000361	0	#N/A	#N/A	0	9.4e-90	28NG8@1|root,2QV1V@2759|Eukaryota,37N09@33090|Viridiplantae,3GBNC@35493|Streptophyta,44PH2@71274|asterids	0.0	#N/A	#N/A	#N/A
PB.90.3	-	-	PREDICTED: Solanum tuberosum uncharacterized LOC102596987 (LOC102596987), transcript variant X3, mRNA	0	hypothetical protein H5410_000361	0	#N/A	#N/A	0	9.4e-90	28NG8@1|root,2QV1V@2759|Eukaryota,37N09@33090|Viridiplantae,3GBNC@35493|Streptophyta,44PH2@71274|asterids	0.0	#N/A	#N/A	#N/A
PB.90.4	-	-	PREDICTED: Solanum tuberosum uncharacterized LOC102596987 (LOC102596987), transcript variant X3, mRNA	0	hypothetical protein H5410_000361	0	#N/A	#N/A	#N/A	#N/A	28NG8@1|root,2QV1V@2759|Eukaryota,37N09@33090|Viridiplantae,3GBNC@35493|Streptophyta,44PH2@71274|asterids	2.89e-187	#N/A	#N/A	#N/A
PB.90.5	-	-	PREDICTED: Solanum tuberosum uncharacterized LOC102596987 (LOC102596987), transcript variant X3, mRNA	0	hypothetical protein KY289_000184	0	#N/A	#N/A	0	1.33e-91	28NG8@1|root,2QV1V@2759|Eukaryota,37N09@33090|Viridiplantae,3GBNC@35493|Streptophyta,44PH2@71274|asterids	2.16e-273	#N/A	#N/A	#N/A
PB.90.6	-	-	PREDICTED: Solanum tuberosum uncharacterized LOC102596987 (LOC102596987), transcript variant X3, mRNA	0	hypothetical protein H5410_000361	0	#N/A	#N/A	0	1.52e-22	28NG8@1|root,2QV1V@2759|Eukaryota,37N09@33090|Viridiplantae,3GBNC@35493|Streptophyta,44PH2@71274|asterids	1.33e-227	#N/A	#N/A	#N/A
PB.91.1	-	-	PREDICTED: Solanum tuberosum uncharacterized LOC102598948 (LOC102598948), transcript variant X2, mRNA	0	hypothetical protein H5410_000363, partial	0	#N/A	#N/A	0	0	28KCA@1|root,2QST8@2759|Eukaryota,37P57@33090|Viridiplantae,3GDGI@35493|Streptophyta,44GKR@71274|asterids	0.0	#N/A	#N/A	NT-C2
PB.92.1	-	-	PREDICTED: Solanum tuberosum putative phosphatidylglycerol/phosphatidylinositol transfer protein DDB_G0282179 (LOC102584076), mRNA	0	hypothetical protein H5410_000365	2.04e-111	#N/A	#N/A	Uncharacterized conserved protein, contains ML domain	7.02e-48	KOG4680@1|root,KOG4680@2759|Eukaryota,37UGH@33090|Viridiplantae,3GIWV@35493|Streptophyta,44S4Z@71274|asterids	5.02e-105	Putative phosphatidylglycerol/phosphatidylinositol transfer protein DDB_G0282179 OS=Dictyostelium discoideum OX=44689 GN=DDB_G0282179 PE=3 SV=2	6.94e-12	E1_DerP2_DerF2
PB.92.2	-	-	PREDICTED: Solanum tuberosum putative phosphatidylglycerol/phosphatidylinositol transfer protein DDB_G0282179 (LOC102584076), mRNA	0	hypothetical protein H5410_000365	2.04e-111	#N/A	#N/A	Uncharacterized conserved protein, contains ML domain	7.02e-48	KOG4680@1|root,KOG4680@2759|Eukaryota,37UGH@33090|Viridiplantae,3GIWV@35493|Streptophyta,44S4Z@71274|asterids	5.02e-105	Putative phosphatidylglycerol/phosphatidylinositol transfer protein DDB_G0282179 OS=Dictyostelium discoideum OX=44689 GN=DDB_G0282179 PE=3 SV=2	6.94e-12	E1_DerP2_DerF2
PB.92.3	-	-	PREDICTED: Solanum tuberosum putative phosphatidylglycerol/phosphatidylinositol transfer protein DDB_G0282179 (LOC102584076), mRNA	0	hypothetical protein H5410_000365	2.04e-111	#N/A	#N/A	Uncharacterized conserved protein, contains ML domain	7.02e-48	KOG4680@1|root,KOG4680@2759|Eukaryota,37UGH@33090|Viridiplantae,3GIWV@35493|Streptophyta,44S4Z@71274|asterids	5.02e-105	Putative phosphatidylglycerol/phosphatidylinositol transfer protein DDB_G0282179 OS=Dictyostelium discoideum OX=44689 GN=DDB_G0282179 PE=3 SV=2	6.94e-12	E1_DerP2_DerF2
PB.92.4	-	-	PREDICTED: Solanum tuberosum putative phosphatidylglycerol/phosphatidylinositol transfer protein DDB_G0282179 (LOC102584076), mRNA	0	hypothetical protein H5410_000365	2.04e-111	#N/A	#N/A	Uncharacterized conserved protein, contains ML domain	7.02e-48	KOG4680@1|root,KOG4680@2759|Eukaryota,37UGH@33090|Viridiplantae,3GIWV@35493|Streptophyta,44S4Z@71274|asterids	5.02e-105	Putative phosphatidylglycerol/phosphatidylinositol transfer protein DDB_G0282179 OS=Dictyostelium discoideum OX=44689 GN=DDB_G0282179 PE=3 SV=2	6.94e-12	E1_DerP2_DerF2
PB.93.1	ko:K11294	GO:0003674,GO:0003676,GO:0003723,GO:0003729,GO:0005488,GO:0005575,GO:0005622,GO:0005623,GO:0005737,GO:0006139,GO:0006364,GO:0006396,GO:0006725,GO:0006807,GO:0008150,GO:0008152,GO:0009507,GO:0009532,GO:0009536,GO:0009570,GO:0009579,GO:0009987,GO:0010467,GO:0016070,GO:0016072,GO:0022613,GO:0031425,GO:0034470,GO:0034641,GO:0034660,GO:0042254,GO:0043170,GO:0043226,GO:0043227,GO:0043229,GO:0043231,GO:…	PREDICTED: Solanum tuberosum 33 kDa ribonucleoprotein, chloroplastic-like (LOC102600250), mRNA	0	hypothetical protein H5410_000370	8.2e-125	RNA-binding protein, RRM domain [Methylacidiphilum infernorum V4]	3.79e-15	FOG: RRM domain	2.75e-15	KOG0118@1|root,KOG0118@2759|Eukaryota,37SE3@33090|Viridiplantae,3GAKD@35493|Streptophyta,44F3G@71274|asterids	6.74e-99	33 kDa ribonucleoprotein, chloroplastic OS=Nicotiana sylvestris OX=4096 PE=1 SV=1	1.98e-49	RRM_1
PB.93.2	ko:K11294	GO:0003674,GO:0003676,GO:0003723,GO:0003729,GO:0005488,GO:0005575,GO:0005622,GO:0005623,GO:0005737,GO:0006139,GO:0006364,GO:0006396,GO:0006725,GO:0006807,GO:0008150,GO:0008152,GO:0009507,GO:0009532,GO:0009536,GO:0009570,GO:0009579,GO:0009987,GO:0010467,GO:0016070,GO:0016072,GO:0022613,GO:0031425,GO:0034470,GO:0034641,GO:0034660,GO:0042254,GO:0043170,GO:0043226,GO:0043227,GO:0043229,GO:0043231,GO:…	PREDICTED: Solanum tuberosum 33 kDa ribonucleoprotein, chloroplastic-like (LOC102600250), mRNA	0	hypothetical protein H5410_000370	0	putative RNA-binding protein RbpA [Candidatus Nitrospira defluvii]	1.97e-16	FOG: RRM domain	1.16e-40	KOG0118@1|root,KOG0118@2759|Eukaryota,37SE3@33090|Viridiplantae,3GAKD@35493|Streptophyta,44F3G@71274|asterids	2.92e-200	33 kDa ribonucleoprotein, chloroplastic OS=Nicotiana sylvestris OX=4096 PE=1 SV=1	3.51e-148	RRM_1
PB.93.3	ko:K11294	GO:0003674,GO:0003676,GO:0003723,GO:0003729,GO:0005488,GO:0005575,GO:0005622,GO:0005623,GO:0005737,GO:0006139,GO:0006364,GO:0006396,GO:0006725,GO:0006807,GO:0008150,GO:0008152,GO:0009507,GO:0009532,GO:0009536,GO:0009570,GO:0009579,GO:0009987,GO:0010467,GO:0016070,GO:0016072,GO:0022613,GO:0031425,GO:0034470,GO:0034641,GO:0034660,GO:0042254,GO:0043170,GO:0043226,GO:0043227,GO:0043229,GO:0043231,GO:…	PREDICTED: Solanum tuberosum 33 kDa ribonucleoprotein, chloroplastic-like (LOC102600250), mRNA	0	hypothetical protein H5410_000370	1.37e-117	RNA-binding protein, RRM domain [Methylacidiphilum infernorum V4]	9.03e-13	FOG: RRM domain	1.33e-12	KOG0118@1|root,KOG0118@2759|Eukaryota,37SE3@33090|Viridiplantae,3GAKD@35493|Streptophyta,44F3G@71274|asterids	2.15e-92	33 kDa ribonucleoprotein, chloroplastic OS=Nicotiana sylvestris OX=4096 PE=1 SV=1	4.26e-42	RRM_1
PB.93.4	ko:K11294	GO:0003674,GO:0003676,GO:0003723,GO:0003729,GO:0005488,GO:0005575,GO:0005622,GO:0005623,GO:0005737,GO:0006139,GO:0006364,GO:0006396,GO:0006725,GO:0006807,GO:0008150,GO:0008152,GO:0009507,GO:0009532,GO:0009536,GO:0009570,GO:0009579,GO:0009987,GO:0010467,GO:0016070,GO:0016072,GO:0022613,GO:0031425,GO:0034470,GO:0034641,GO:0034660,GO:0042254,GO:0043170,GO:0043226,GO:0043227,GO:0043229,GO:0043231,GO:…	PREDICTED: Solanum tuberosum 33 kDa ribonucleoprotein, chloroplastic-like (LOC102600250), mRNA	0	hypothetical protein H5410_000370	0	putative RNA-binding protein RbpA [Candidatus Nitrospira defluvii]	1.97e-16	FOG: RRM domain	1.16e-40	KOG0118@1|root,KOG0118@2759|Eukaryota,37SE3@33090|Viridiplantae,3GAKD@35493|Streptophyta,44F3G@71274|asterids	2.92e-200	33 kDa ribonucleoprotein, chloroplastic OS=Nicotiana sylvestris OX=4096 PE=1 SV=1	3.51e-148	RRM_1
PB.94.1	ko:K14442,ko:K21843	GO:0000976,GO:0000977,GO:0000978,GO:0000987,GO:0001012,GO:0001067,GO:0001503,GO:0001817,GO:0001819,GO:0002151,GO:0002791,GO:0002793,GO:0003674,GO:0003676,GO:0003677,GO:0003690,GO:0003697,GO:0003723,GO:0003724,GO:0003725,GO:0003824,GO:0004004,GO:0004386,GO:0005488,GO:0005515,GO:0005575,GO:0005622,GO:0005623,GO:0005634,GO:0005737,GO:0005739,GO:0005829,GO:0006139,GO:0006355,GO:0006357,GO:0006396,GO:…	PREDICTED: Solanum tuberosum ATP-dependent RNA helicase DHX36 (LOC102584740), partial mRNA	0	hypothetical protein KY290_000189	0	ATP-dependent helicase HrpA [Nitrosospira multiformis ATCC 25196]	4.41e-103	ATP-dependent RNA helicase A	0	COG1643@1|root,KOG0920@2759|Eukaryota,37Q5J@33090|Viridiplantae,3GGJI@35493|Streptophyta,44DEP@71274|asterids	0.0	DExH-box ATP-dependent RNA helicase DExH1 OS=Arabidopsis thaliana OX=3702 GN=At2g35920 PE=2 SV=1	0	DEAD & Helicase_C & HA2 & OB_NTP_bind
PB.94.2	ko:K14442,ko:K21843	GO:0000976,GO:0000977,GO:0000978,GO:0000987,GO:0001012,GO:0001067,GO:0001503,GO:0001817,GO:0001819,GO:0002151,GO:0002791,GO:0002793,GO:0003674,GO:0003676,GO:0003677,GO:0003690,GO:0003697,GO:0003723,GO:0003724,GO:0003725,GO:0003824,GO:0004004,GO:0004386,GO:0005488,GO:0005515,GO:0005575,GO:0005622,GO:0005623,GO:0005634,GO:0005737,GO:0005739,GO:0005829,GO:0006139,GO:0006355,GO:0006357,GO:0006396,GO:…	PREDICTED: Solanum tuberosum ATP-dependent RNA helicase DHX36 (LOC102584740), partial mRNA	0	hypothetical protein KY290_000189	0	ATP-dependent helicase HrpA [Nitrosospira multiformis ATCC 25196]	7.01e-102	ATP-dependent RNA helicase A	0	COG1643@1|root,KOG0920@2759|Eukaryota,37Q5J@33090|Viridiplantae,3GGJI@35493|Streptophyta,44DEP@71274|asterids	0.0	DExH-box ATP-dependent RNA helicase DExH1 OS=Arabidopsis thaliana OX=3702 GN=At2g35920 PE=2 SV=1	0	DEAD & Helicase_C & HA2 & OB_NTP_bind
PB.94.3	ko:K14442,ko:K21843	GO:0000976,GO:0000977,GO:0000978,GO:0000987,GO:0001012,GO:0001067,GO:0001503,GO:0001817,GO:0001819,GO:0002151,GO:0002791,GO:0002793,GO:0003674,GO:0003676,GO:0003677,GO:0003690,GO:0003697,GO:0003723,GO:0003724,GO:0003725,GO:0003824,GO:0004004,GO:0004386,GO:0005488,GO:0005515,GO:0005575,GO:0005622,GO:0005623,GO:0005634,GO:0005737,GO:0005739,GO:0005829,GO:0006139,GO:0006355,GO:0006357,GO:0006396,GO:…	PREDICTED: Solanum pennellii DExH-box ATP-dependent RNA helicase DExH1 (LOC107008302), transcript variant X1, mRNA	0	hypothetical protein KY290_000189	8.64e-164	#N/A	#N/A	#N/A	#N/A	COG1643@1|root,KOG0920@2759|Eukaryota,37Q5J@33090|Viridiplantae,3GGJI@35493|Streptophyta,44DEP@71274|asterids	6.67e-116	DExH-box ATP-dependent RNA helicase DExH1 OS=Arabidopsis thaliana OX=3702 GN=At2g35920 PE=2 SV=1	1.67e-62	#N/A
PB.94.4	ko:K14442,ko:K21843	GO:0000976,GO:0000977,GO:0000978,GO:0000987,GO:0001012,GO:0001067,GO:0001503,GO:0001817,GO:0001819,GO:0002151,GO:0002791,GO:0002793,GO:0003674,GO:0003676,GO:0003677,GO:0003690,GO:0003697,GO:0003723,GO:0003724,GO:0003725,GO:0003824,GO:0004004,GO:0004386,GO:0005488,GO:0005515,GO:0005575,GO:0005622,GO:0005623,GO:0005634,GO:0005737,GO:0005739,GO:0005829,GO:0006139,GO:0006355,GO:0006357,GO:0006396,GO:…	PREDICTED: Solanum tuberosum ATP-dependent RNA helicase DHX36 (LOC102584740), partial mRNA	0	hypothetical protein KY290_000189	0	ATP-dependent helicase HrpA [Nitrosospira multiformis ATCC 25196]	4.41e-103	ATP-dependent RNA helicase A	0	COG1643@1|root,KOG0920@2759|Eukaryota,37Q5J@33090|Viridiplantae,3GGJI@35493|Streptophyta,44DEP@71274|asterids	0.0	DExH-box ATP-dependent RNA helicase DExH1 OS=Arabidopsis thaliana OX=3702 GN=At2g35920 PE=2 SV=1	0	DEAD & Helicase_C & HA2 & OB_NTP_bind
PB.94.5	ko:K14442,ko:K21843	GO:0000976,GO:0000977,GO:0000978,GO:0000987,GO:0001012,GO:0001067,GO:0001503,GO:0001817,GO:0001819,GO:0002151,GO:0002791,GO:0002793,GO:0003674,GO:0003676,GO:0003677,GO:0003690,GO:0003697,GO:0003723,GO:0003724,GO:0003725,GO:0003824,GO:0004004,GO:0004386,GO:0005488,GO:0005515,GO:0005575,GO:0005622,GO:0005623,GO:0005634,GO:0005737,GO:0005739,GO:0005829,GO:0006139,GO:0006355,GO:0006357,GO:0006396,GO:…	PREDICTED: Solanum tuberosum ATP-dependent RNA helicase DHX36 (LOC102584740), partial mRNA	0	hypothetical protein KY290_000189	0	ATP-dependent helicase HrpA [Nitrosospira multiformis ATCC 25196]	4.41e-103	ATP-dependent RNA helicase A	0	COG1643@1|root,KOG0920@2759|Eukaryota,37Q5J@33090|Viridiplantae,3GGJI@35493|Streptophyta,44DEP@71274|asterids	0.0	DExH-box ATP-dependent RNA helicase DExH1 OS=Arabidopsis thaliana OX=3702 GN=At2g35920 PE=2 SV=1	0	DEAD & Helicase_C & HA2 & OB_NTP_bind
PB.95.1	ko:K20305	-	PREDICTED: Solanum tuberosum trafficking protein particle complex subunit 8 (LOC102600916), mRNA	0	hypothetical protein KY285_003677	0	#N/A	#N/A	Protein with predicted involvement in meiosis (GSG1)	0	KOG1938@1|root,KOG1938@2759|Eukaryota,37K9Z@33090|Viridiplantae,3G93F@35493|Streptophyta,44GVE@71274|asterids	0.0	Trafficking protein particle complex subunit 8 OS=Homo sapiens OX=9606 GN=TRAPPC8 PE=1 SV=2	2.83e-59	TRAPPC-Trs85 & TRAPPC9-Trs120
PB.96.1	ko:K10293	-	Solanum tuberosum cultivar Solyntus chromosome 1	0	hypothetical protein H5410_000376	0	#N/A	#N/A	#N/A	#N/A	28M5S@1|root,2QTNJ@2759|Eukaryota,37J26@33090|Viridiplantae,3GBM1@35493|Streptophyta,44G4J@71274|asterids	1.3e-255	F-box protein SKIP22 OS=Arabidopsis thaliana OX=3702 GN=SKIP22 PE=1 SV=1	3.34e-51	UN_NPL4
PB.96.2	ko:K10293	-	Solanum tuberosum cultivar Solyntus chromosome 1	0	hypothetical protein H5410_000376	0	#N/A	#N/A	#N/A	#N/A	28M5S@1|root,2QTNJ@2759|Eukaryota,37J26@33090|Viridiplantae,3GBM1@35493|Streptophyta,44G4J@71274|asterids	0.0	F-box protein SKIP22 OS=Arabidopsis thaliana OX=3702 GN=SKIP22 PE=1 SV=1	1.67e-61	UN_NPL4
PB.97.1	ko:K00645	-	PREDICTED: Solanum tuberosum malonyl CoA-acyl carrier protein transacylase (LOC102601265), mRNA	0	hypothetical protein KY289_000196	0	malonyl CoA-acyl carrier protein transacylase [Pirellula staleyi DSM 6068]	1.17e-107	Malonyl-CoA:ACP transacylase	1.04e-51	COG0331@1|root,KOG2926@2759|Eukaryota,37K6Y@33090|Viridiplantae,3GAYG@35493|Streptophyta,44GWD@71274|asterids	6.23e-245	Malonyl-CoA-acyl carrier protein transacylase, mitochondrial OS=Mus musculus OX=10090 GN=Mcat PE=1 SV=3	8e-73	Acyl_transf_1
PB.97.2	ko:K00645	-	PREDICTED: Solanum tuberosum malonyl CoA-acyl carrier protein transacylase (LOC102601265), mRNA	0	hypothetical protein KY289_000196	0	malonyl CoA-acyl carrier protein transacylase [Pirellula staleyi DSM 6068]	7.97e-108	Malonyl-CoA:ACP transacylase	1.22e-51	COG0331@1|root,KOG2926@2759|Eukaryota,37K6Y@33090|Viridiplantae,3GAYG@35493|Streptophyta,44GWD@71274|asterids	2.17e-245	Malonyl-CoA-acyl carrier protein transacylase, mitochondrial OS=Mus musculus OX=10090 GN=Mcat PE=1 SV=3	7.92e-73	Acyl_transf_1
PB.97.3	ko:K00645	-	PREDICTED: Solanum tuberosum malonyl CoA-acyl carrier protein transacylase (LOC102601265), mRNA	0	hypothetical protein KY289_000196	0	malonyl CoA-acyl carrier protein transacylase [Pirellula staleyi DSM 6068]	1.17e-107	Malonyl-CoA:ACP transacylase	1.04e-51	COG0331@1|root,KOG2926@2759|Eukaryota,37K6Y@33090|Viridiplantae,3GAYG@35493|Streptophyta,44GWD@71274|asterids	6.23e-245	Malonyl-CoA-acyl carrier protein transacylase, mitochondrial OS=Mus musculus OX=10090 GN=Mcat PE=1 SV=3	8e-73	Acyl_transf_1
PB.97.4	ko:K00645	-	PREDICTED: Solanum tuberosum malonyl CoA-acyl carrier protein transacylase (LOC102601265), mRNA	0	hypothetical protein KY289_000196	0	malonyl CoA-acyl carrier protein transacylase [Pirellula staleyi DSM 6068]	2.53e-107	Malonyl-CoA:ACP transacylase	1.22e-51	COG0331@1|root,KOG2926@2759|Eukaryota,37K6Y@33090|Viridiplantae,3GAYG@35493|Streptophyta,44GWD@71274|asterids	7.58e-246	Malonyl-CoA-acyl carrier protein transacylase, mitochondrial OS=Mus musculus OX=10090 GN=Mcat PE=1 SV=3	8e-73	Acyl_transf_1
PB.97.5	ko:K00645	-	PREDICTED: Solanum tuberosum malonyl CoA-acyl carrier protein transacylase (LOC102601265), mRNA	0	hypothetical protein KY285_000177	0	malonyl CoA-acyl carrier protein transacylase [Pirellula staleyi DSM 6068]	7.19e-108	Malonyl-CoA:ACP transacylase	6.79e-52	COG0331@1|root,KOG2926@2759|Eukaryota,37K6Y@33090|Viridiplantae,3GAYG@35493|Streptophyta,44GWD@71274|asterids	4.88e-233	Malonyl-CoA-acyl carrier protein transacylase, mitochondrial OS=Mus musculus OX=10090 GN=Mcat PE=1 SV=3	2.71e-73	Acyl_transf_1
PB.98.1	-	GO:0001101,GO:0003674,GO:0003824,GO:0004842,GO:0005575,GO:0005622,GO:0005623,GO:0005737,GO:0005829,GO:0006464,GO:0006807,GO:0006950,GO:0008150,GO:0008152,GO:0009414,GO:0009415,GO:0009628,GO:0009987,GO:0010033,GO:0010035,GO:0010200,GO:0010243,GO:0016567,GO:0016740,GO:0019538,GO:0019787,GO:0032446,GO:0036211,GO:0042221,GO:0042493,GO:0043170,GO:0043412,GO:0044237,GO:0044238,GO:0044260,GO:0044267,GO:…	Solanum tuberosum cultivar Solyntus chromosome 1	0	hypothetical protein KY285_000186	0	hypothetical protein Aasi_0849 [Candidatus Amoebophilus asiaticus 5a2]	7.92e-10	0	4.95e-32	28IQ6@1|root,2QR1A@2759|Eukaryota,37NEC@33090|Viridiplantae,3G8RQ@35493|Streptophyta,44FAS@71274|asterids	4.53e-265	E3 ubiquitin-protein ligase PUB23 OS=Arabidopsis thaliana OX=3702 GN=PUB23 PE=1 SV=1	3.32e-166	U-box
PB.99.1	-	GO:0000741,GO:0001101,GO:0003674,GO:0003676,GO:0003677,GO:0003700,GO:0005488,GO:0005515,GO:0005575,GO:0005622,GO:0005623,GO:0005634,GO:0005737,GO:0006355,GO:0006996,GO:0006997,GO:0007275,GO:0008150,GO:0009314,GO:0009416,GO:0009553,GO:0009559,GO:0009561,GO:0009605,GO:0009607,GO:0009608,GO:0009610,GO:0009620,GO:0009628,GO:0009639,GO:0009719,GO:0009725,GO:0009737,GO:0009889,GO:0009987,GO:0010033,GO:…	Solanum tuberosum BEL1-related homeotic protein 29 (Bel29) mRNA, partial cds	0	hypothetical protein H5410_000385	0	#N/A	#N/A	Transcription factor MEIS1 and related HOX domain proteins	6.18e-53	KOG0773@1|root,KOG0773@2759|Eukaryota,37MAS@33090|Viridiplantae,3G8FZ@35493|Streptophyta,44F8R@71274|asterids	1.45e-263	BEL1-like homeodomain protein 1 OS=Arabidopsis thaliana OX=3702 GN=BLH1 PE=1 SV=1	2.25e-88	Homeobox_KN & Homeodomain
PB.99.2	-	GO:0000741,GO:0001101,GO:0003674,GO:0003676,GO:0003677,GO:0003700,GO:0005488,GO:0005515,GO:0005575,GO:0005622,GO:0005623,GO:0005634,GO:0005737,GO:0006355,GO:0006996,GO:0006997,GO:0007275,GO:0008150,GO:0009314,GO:0009416,GO:0009553,GO:0009559,GO:0009561,GO:0009605,GO:0009607,GO:0009608,GO:0009610,GO:0009620,GO:0009628,GO:0009639,GO:0009719,GO:0009725,GO:0009737,GO:0009889,GO:0009987,GO:0010033,GO:…	Solanum tuberosum BEL1-related homeotic protein 29 (Bel29) mRNA, partial cds	0	hypothetical protein H5410_000385	0	#N/A	#N/A	Transcription factor MEIS1 and related HOX domain proteins	2.15e-92	KOG0773@1|root,KOG0773@2759|Eukaryota,37MAS@33090|Viridiplantae,3G8FZ@35493|Streptophyta,44F8R@71274|asterids	0.0	BEL1-like homeodomain protein 1 OS=Arabidopsis thaliana OX=3702 GN=BLH1 PE=1 SV=1	4.43e-136	POX & Homeobox_KN & Homeodomain
PB.99.3	-	GO:0000741,GO:0001101,GO:0003674,GO:0003676,GO:0003677,GO:0003700,GO:0005488,GO:0005515,GO:0005575,GO:0005622,GO:0005623,GO:0005634,GO:0005737,GO:0006355,GO:0006996,GO:0006997,GO:0007275,GO:0008150,GO:0009314,GO:0009416,GO:0009553,GO:0009559,GO:0009561,GO:0009605,GO:0009607,GO:0009608,GO:0009610,GO:0009620,GO:0009628,GO:0009639,GO:0009719,GO:0009725,GO:0009737,GO:0009889,GO:0009987,GO:0010033,GO:…	PREDICTED: Solanum tuberosum BEL1-like homeodomain protein 1 (LOC102606309), transcript variant X3, mRNA	0	hypothetical protein H5410_000385	0	#N/A	#N/A	Transcription factor MEIS1 and related HOX domain proteins	1.63e-93	KOG0773@1|root,KOG0773@2759|Eukaryota,37MAS@33090|Viridiplantae,3G8FZ@35493|Streptophyta,44F8R@71274|asterids	0.0	BEL1-like homeodomain protein 1 OS=Arabidopsis thaliana OX=3702 GN=BLH1 PE=1 SV=1	2.74e-147	POX & Homeobox_KN & Homeodomain
PB.99.4	-	GO:0000741,GO:0001101,GO:0003674,GO:0003676,GO:0003677,GO:0003700,GO:0005488,GO:0005515,GO:0005575,GO:0005622,GO:0005623,GO:0005634,GO:0005737,GO:0006355,GO:0006996,GO:0006997,GO:0007275,GO:0008150,GO:0009314,GO:0009416,GO:0009553,GO:0009559,GO:0009561,GO:0009605,GO:0009607,GO:0009608,GO:0009610,GO:0009620,GO:0009628,GO:0009639,GO:0009719,GO:0009725,GO:0009737,GO:0009889,GO:0009987,GO:0010033,GO:…	Solanum tuberosum BEL1-related homeotic protein 29 (Bel29) mRNA, partial cds	0	hypothetical protein H5410_000385	0	#N/A	#N/A	Transcription factor MEIS1 and related HOX domain proteins	1.08e-62	KOG0773@1|root,KOG0773@2759|Eukaryota,37MAS@33090|Viridiplantae,3G8FZ@35493|Streptophyta,44F8R@71274|asterids	4.02e-275	BEL1-like homeodomain protein 1 OS=Arabidopsis thaliana OX=3702 GN=BLH1 PE=1 SV=1	1.28e-99	POX & Homeobox_KN & Homeodomain
PB.99.5	-	GO:0000741,GO:0001101,GO:0003674,GO:0003676,GO:0003677,GO:0003700,GO:0005488,GO:0005515,GO:0005575,GO:0005622,GO:0005623,GO:0005634,GO:0005737,GO:0006355,GO:0006996,GO:0006997,GO:0007275,GO:0008150,GO:0009314,GO:0009416,GO:0009553,GO:0009559,GO:0009561,GO:0009605,GO:0009607,GO:0009608,GO:0009610,GO:0009620,GO:0009628,GO:0009639,GO:0009719,GO:0009725,GO:0009737,GO:0009889,GO:0009987,GO:0010033,GO:…	Solanum tuberosum BEL1-related homeotic protein 29 (Bel29) mRNA, partial cds	0	hypothetical protein H5410_000385	0	#N/A	#N/A	Transcription factor MEIS1 and related HOX domain proteins	4.61e-16	KOG0773@1|root,KOG0773@2759|Eukaryota,37MAS@33090|Viridiplantae,3G8FZ@35493|Streptophyta,44F8R@71274|asterids	4.21e-197	BEL1-like homeodomain protein 1 OS=Arabidopsis thaliana OX=3702 GN=BLH1 PE=1 SV=1	1.49e-33	Homeobox_KN
PB.99.6	-	GO:0000741,GO:0001101,GO:0003674,GO:0003676,GO:0003677,GO:0003700,GO:0005488,GO:0005515,GO:0005575,GO:0005622,GO:0005623,GO:0005634,GO:0005737,GO:0006355,GO:0006996,GO:0006997,GO:0007275,GO:0008150,GO:0009314,GO:0009416,GO:0009553,GO:0009559,GO:0009561,GO:0009605,GO:0009607,GO:0009608,GO:0009610,GO:0009620,GO:0009628,GO:0009639,GO:0009719,GO:0009725,GO:0009737,GO:0009889,GO:0009987,GO:0010033,GO:…	PREDICTED: Solanum tuberosum BEL1-like homeodomain protein 1 (LOC102606309), transcript variant X3, mRNA	0	hypothetical protein H5410_000385	0	#N/A	#N/A	Transcription factor MEIS1 and related HOX domain proteins	1.46e-93	KOG0773@1|root,KOG0773@2759|Eukaryota,37MAS@33090|Viridiplantae,3G8FZ@35493|Streptophyta,44F8R@71274|asterids	0.0	BEL1-like homeodomain protein 1 OS=Arabidopsis thaliana OX=3702 GN=BLH1 PE=1 SV=1	4.21e-150	POX & Homeobox_KN & Homeodomain
PB.100.1	-	-	PREDICTED: Solanum tuberosum BTB/POZ domain-containing protein At3g05675 (LOC102604620), transcript variant X6, mRNA	0	hypothetical protein KY285_000188	0	#N/A	#N/A	#N/A	#N/A	28JVW@1|root,2QSA0@2759|Eukaryota,37MHC@33090|Viridiplantae,3GA7I@35493|Streptophyta,44B35@71274|asterids	4.49e-238	BTB/POZ domain-containing protein At3g05675 OS=Arabidopsis thaliana OX=3702 GN=At3g05675 PE=2 SV=1	9.22e-130	#N/A
PB.101.1	ko:K09480	GO:0001101,GO:0003674,GO:0003824,GO:0005575,GO:0005622,GO:0005623,GO:0005737,GO:0005739,GO:0006082,GO:0006629,GO:0006631,GO:0006633,GO:0006643,GO:0006664,GO:0006725,GO:0007154,GO:0007165,GO:0008150,GO:0008152,GO:0008194,GO:0008378,GO:0008610,GO:0009058,GO:0009247,GO:0009507,GO:0009526,GO:0009527,GO:0009536,GO:0009698,GO:0009699,GO:0009707,GO:0009719,GO:0009725,GO:0009753,GO:0009755,GO:0009808,GO:…	PREDICTED: Solanum tuberosum digalactosyldiacylglycerol synthase 1, chloroplastic-like (LOC102578535), mRNA	0	hypothetical protein H5410_000390	0	glycosyltransferase [Rivularia sp. PCC 7116]	3.78e-06	#N/A	#N/A	2CMFA@1|root,2QQ73@2759|Eukaryota,37MAG@33090|Viridiplantae,3G8FH@35493|Streptophyta,44N68@71274|asterids	0.0	Digalactosyldiacylglycerol synthase 1, chloroplastic OS=Lotus japonicus OX=34305 GN=DGD1 PE=2 SV=1	0	Glycos_transf_1 & Glyco_trans_1_4
PB.101.2	ko:K09480	GO:0001101,GO:0003674,GO:0003824,GO:0005575,GO:0005622,GO:0005623,GO:0005737,GO:0005739,GO:0006082,GO:0006629,GO:0006631,GO:0006633,GO:0006643,GO:0006664,GO:0006725,GO:0007154,GO:0007165,GO:0008150,GO:0008152,GO:0008194,GO:0008378,GO:0008610,GO:0009058,GO:0009247,GO:0009507,GO:0009526,GO:0009527,GO:0009536,GO:0009698,GO:0009699,GO:0009707,GO:0009719,GO:0009725,GO:0009753,GO:0009755,GO:0009808,GO:…	PREDICTED: Solanum tuberosum digalactosyldiacylglycerol synthase 1, chloroplastic-like (LOC102578535), mRNA	0	hypothetical protein H5410_000390	0	glycosyltransferase [Rivularia sp. PCC 7116]	4.71e-07	#N/A	#N/A	2CMFA@1|root,2QQ73@2759|Eukaryota,37MAG@33090|Viridiplantae,3G8FH@35493|Streptophyta,44N68@71274|asterids	7.09e-183	Digalactosyldiacylglycerol synthase 1, chloroplastic OS=Lotus japonicus OX=34305 GN=DGD1 PE=2 SV=1	5.23e-151	Glycos_transf_1 & Glyco_trans_1_4
PB.101.3	ko:K09480	GO:0001101,GO:0003674,GO:0003824,GO:0005575,GO:0005622,GO:0005623,GO:0005737,GO:0005739,GO:0006082,GO:0006629,GO:0006631,GO:0006633,GO:0006643,GO:0006664,GO:0006725,GO:0007154,GO:0007165,GO:0008150,GO:0008152,GO:0008194,GO:0008378,GO:0008610,GO:0009058,GO:0009247,GO:0009507,GO:0009526,GO:0009527,GO:0009536,GO:0009698,GO:0009699,GO:0009707,GO:0009719,GO:0009725,GO:0009753,GO:0009755,GO:0009808,GO:…	PREDICTED: Solanum tuberosum digalactosyldiacylglycerol synthase 1, chloroplastic-like (LOC102578535), mRNA	0	hypothetical protein H5410_000390	0	glycosyltransferase [Rivularia sp. PCC 7116]	1.13e-06	#N/A	#N/A	2CMFA@1|root,2QQ73@2759|Eukaryota,37MAG@33090|Viridiplantae,3G8FH@35493|Streptophyta,44N68@71274|asterids	1.86e-305	Digalactosyldiacylglycerol synthase 1, chloroplastic OS=Glycine max OX=3847 GN=DGD1 PE=2 SV=1	0	Glycos_transf_1 & Glyco_trans_1_4
PB.101.4	ko:K09480	GO:0001101,GO:0003674,GO:0003824,GO:0005575,GO:0005622,GO:0005623,GO:0005737,GO:0005739,GO:0006082,GO:0006629,GO:0006631,GO:0006633,GO:0006643,GO:0006664,GO:0006725,GO:0007154,GO:0007165,GO:0008150,GO:0008152,GO:0008194,GO:0008378,GO:0008610,GO:0009058,GO:0009247,GO:0009507,GO:0009526,GO:0009527,GO:0009536,GO:0009698,GO:0009699,GO:0009707,GO:0009719,GO:0009725,GO:0009753,GO:0009755,GO:0009808,GO:…	PREDICTED: Solanum tuberosum digalactosyldiacylglycerol synthase 1, chloroplastic-like (LOC102578535), mRNA	0	hypothetical protein H5410_000390	0	glycosyltransferase [Rivularia sp. PCC 7116]	3.78e-06	#N/A	#N/A	2CMFA@1|root,2QQ73@2759|Eukaryota,37MAG@33090|Viridiplantae,3G8FH@35493|Streptophyta,44N68@71274|asterids	0.0	Digalactosyldiacylglycerol synthase 1, chloroplastic OS=Lotus japonicus OX=34305 GN=DGD1 PE=2 SV=1	0	Glycos_transf_1 & Glyco_trans_1_4
PB.101.5	ko:K09480	GO:0001101,GO:0003674,GO:0003824,GO:0005575,GO:0005622,GO:0005623,GO:0005737,GO:0005739,GO:0006082,GO:0006629,GO:0006631,GO:0006633,GO:0006643,GO:0006664,GO:0006725,GO:0007154,GO:0007165,GO:0008150,GO:0008152,GO:0008194,GO:0008378,GO:0008610,GO:0009058,GO:0009247,GO:0009507,GO:0009526,GO:0009527,GO:0009536,GO:0009698,GO:0009699,GO:0009707,GO:0009719,GO:0009725,GO:0009753,GO:0009755,GO:0009808,GO:…	PREDICTED: Solanum tuberosum digalactosyldiacylglycerol synthase 1, chloroplastic-like (LOC102578535), mRNA	0	hypothetical protein H5410_000390	1.62e-134	glycosyltransferase [Rivularia sp. PCC 7116]	1.9e-06	#N/A	#N/A	2CMFA@1|root,2QQ73@2759|Eukaryota,37MAG@33090|Viridiplantae,3G8FH@35493|Streptophyta,44N68@71274|asterids	2.49e-125	Digalactosyldiacylglycerol synthase 1, chloroplastic OS=Lotus japonicus OX=34305 GN=DGD1 PE=2 SV=1	2.83e-53	Glycos_transf_1 & Glyco_trans_1_4
PB.101.6	ko:K09480	GO:0001101,GO:0003674,GO:0003824,GO:0005575,GO:0005622,GO:0005623,GO:0005737,GO:0005739,GO:0006082,GO:0006629,GO:0006631,GO:0006633,GO:0006643,GO:0006664,GO:0006725,GO:0007154,GO:0007165,GO:0008150,GO:0008152,GO:0008194,GO:0008378,GO:0008610,GO:0009058,GO:0009247,GO:0009507,GO:0009526,GO:0009527,GO:0009536,GO:0009698,GO:0009699,GO:0009707,GO:0009719,GO:0009725,GO:0009753,GO:0009755,GO:0009808,GO:…	PREDICTED: Solanum tuberosum digalactosyldiacylglycerol synthase 1, chloroplastic-like (LOC102578535), mRNA	0	hypothetical protein H5410_000390	0	glycosyltransferase [Rivularia sp. PCC 7116]	3.78e-06	#N/A	#N/A	2CMFA@1|root,2QQ73@2759|Eukaryota,37MAG@33090|Viridiplantae,3G8FH@35493|Streptophyta,44N68@71274|asterids	0.0	Digalactosyldiacylglycerol synthase 1, chloroplastic OS=Lotus japonicus OX=34305 GN=DGD1 PE=2 SV=1	0	Glycos_transf_1 & Glyco_trans_1_4
PB.101.7	ko:K09480	GO:0001101,GO:0003674,GO:0003824,GO:0005575,GO:0005622,GO:0005623,GO:0005737,GO:0005739,GO:0006082,GO:0006629,GO:0006631,GO:0006633,GO:0006643,GO:0006664,GO:0006725,GO:0007154,GO:0007165,GO:0008150,GO:0008152,GO:0008194,GO:0008378,GO:0008610,GO:0009058,GO:0009247,GO:0009507,GO:0009526,GO:0009527,GO:0009536,GO:0009698,GO:0009699,GO:0009707,GO:0009719,GO:0009725,GO:0009753,GO:0009755,GO:0009808,GO:…	Solanum pinnatisectum cultivar CGN17745 chromosome 1	8.31e-177	hypothetical protein H5410_000390	1.24e-74	#N/A	#N/A	#N/A	#N/A	2CMFA@1|root,2QQ73@2759|Eukaryota,37MAG@33090|Viridiplantae,3G8FH@35493|Streptophyta	1.35e-32	Digalactosyldiacylglycerol synthase 1, chloroplastic OS=Glycine max OX=3847 GN=DGD1 PE=2 SV=1	4.31e-32	#N/A
PB.102.1	-	-	PREDICTED: Solanum tuberosum uncharacterized LOC102578879 (LOC102578879), transcript variant X1, mRNA	0	hypothetical protein H5410_000391	0	#N/A	#N/A	0	1.99e-123	2CN8T@1|root,2QUIP@2759|Eukaryota,37N03@33090|Viridiplantae,3GE58@35493|Streptophyta,44FWX@71274|asterids	1.5e-183	Protein LEAD-SENSITIVE 1 OS=Arabidopsis thaliana OX=3702 GN=PSE1 PE=2 SV=1	3.12e-149	LRAT
PB.102.2	#N/A	#N/A	#N/A	#N/A	#N/A	#N/A	#N/A	#N/A	#N/A	#N/A	#N/A	#N/A	#N/A	#N/A	#N/A
PB.102.3	-	-	PREDICTED: Solanum tuberosum uncharacterized LOC102578879 (LOC102578879), transcript variant X1, mRNA	0	hypothetical protein H5410_000391	0	#N/A	#N/A	0	1.99e-123	2CN8T@1|root,2QUIP@2759|Eukaryota,37N03@33090|Viridiplantae,3GE58@35493|Streptophyta,44FWX@71274|asterids	1.5e-183	Protein LEAD-SENSITIVE 1 OS=Arabidopsis thaliana OX=3702 GN=PSE1 PE=2 SV=1	3.12e-149	LRAT
PB.102.4	-	-	PREDICTED: Solanum tuberosum uncharacterized LOC102578879 (LOC102578879), transcript variant X1, mRNA	0	hypothetical protein H5410_000391	0	#N/A	#N/A	0	1.99e-123	2CN8T@1|root,2QUIP@2759|Eukaryota,37N03@33090|Viridiplantae,3GE58@35493|Streptophyta,44FWX@71274|asterids	1.5e-183	Protein LEAD-SENSITIVE 1 OS=Arabidopsis thaliana OX=3702 GN=PSE1 PE=2 SV=1	3.12e-149	LRAT
PB.102.5	-	-	PREDICTED: Solanum tuberosum uncharacterized LOC102578879 (LOC102578879), transcript variant X1, mRNA	0	hypothetical protein H5410_000391	0	#N/A	#N/A	0	1.99e-123	2CN8T@1|root,2QUIP@2759|Eukaryota,37N03@33090|Viridiplantae,3GE58@35493|Streptophyta,44FWX@71274|asterids	1.5e-183	Protein LEAD-SENSITIVE 1 OS=Arabidopsis thaliana OX=3702 GN=PSE1 PE=2 SV=1	3.12e-149	LRAT
PB.102.6	-	-	PREDICTED: Solanum tuberosum uncharacterized LOC102578879 (LOC102578879), transcript variant X1, mRNA	0	hypothetical protein H5410_000391	0	#N/A	#N/A	0	1.99e-123	2CN8T@1|root,2QUIP@2759|Eukaryota,37N03@33090|Viridiplantae,3GE58@35493|Streptophyta,44FWX@71274|asterids	1.5e-183	Protein LEAD-SENSITIVE 1 OS=Arabidopsis thaliana OX=3702 GN=PSE1 PE=2 SV=1	3.12e-149	LRAT
PB.103.1	ko:K00924	GO:0003674,GO:0003824,GO:0004672,GO:0004674,GO:0004675,GO:0004888,GO:0005575,GO:0005576,GO:0005623,GO:0005886,GO:0006464,GO:0006468,GO:0006793,GO:0006796,GO:0006807,GO:0007154,GO:0007165,GO:0007166,GO:0007167,GO:0007178,GO:0008150,GO:0008152,GO:0009987,GO:0016020,GO:0016301,GO:0016310,GO:0016740,GO:0016772,GO:0016773,GO:0019199,GO:0019538,GO:0023052,GO:0036211,GO:0038023,GO:0043170,GO:0043412,GO:…	PREDICTED: Solanum tuberosum receptor-like kinase TMK3 (LOC102579753), mRNA	0	hypothetical protein H5410_000393	0	RHS repeat-associated core domain-containing protein [Cyclobacterium marinum DSM 745]	1.78e-25	0	6.45e-84	COG0515@1|root,2QPQ4@2759|Eukaryota,37HPF@33090|Viridiplantae,3G88X@35493|Streptophyta,44G8P@71274|asterids	0.0	Receptor-like kinase TMK3 OS=Arabidopsis thaliana OX=3702 GN=TMK3 PE=1 SV=1	0	LRR_8 & PK_Tyr_Ser-Thr & Pkinase
PB.103.2	ko:K00924	GO:0003674,GO:0003824,GO:0004672,GO:0004674,GO:0004675,GO:0004888,GO:0005575,GO:0005576,GO:0005623,GO:0005886,GO:0006464,GO:0006468,GO:0006793,GO:0006796,GO:0006807,GO:0007154,GO:0007165,GO:0007166,GO:0007167,GO:0007178,GO:0008150,GO:0008152,GO:0009987,GO:0016020,GO:0016301,GO:0016310,GO:0016740,GO:0016772,GO:0016773,GO:0019199,GO:0019538,GO:0023052,GO:0036211,GO:0038023,GO:0043170,GO:0043412,GO:…	PREDICTED: Solanum tuberosum receptor-like kinase TMK3 (LOC102579753), mRNA	0	hypothetical protein H5410_000393	0	RHS repeat-associated core domain-containing protein [Cyclobacterium marinum DSM 745]	1.78e-25	0	6.45e-84	COG0515@1|root,2QPQ4@2759|Eukaryota,37HPF@33090|Viridiplantae,3G88X@35493|Streptophyta,44G8P@71274|asterids	0.0	Receptor-like kinase TMK3 OS=Arabidopsis thaliana OX=3702 GN=TMK3 PE=1 SV=1	0	LRR_8 & PK_Tyr_Ser-Thr & Pkinase
PB.103.3	ko:K00924	GO:0003674,GO:0003824,GO:0004672,GO:0004674,GO:0004675,GO:0004888,GO:0005575,GO:0005576,GO:0005623,GO:0005886,GO:0006464,GO:0006468,GO:0006793,GO:0006796,GO:0006807,GO:0007154,GO:0007165,GO:0007166,GO:0007167,GO:0007178,GO:0008150,GO:0008152,GO:0009987,GO:0016020,GO:0016301,GO:0016310,GO:0016740,GO:0016772,GO:0016773,GO:0019199,GO:0019538,GO:0023052,GO:0036211,GO:0038023,GO:0043170,GO:0043412,GO:…	PREDICTED: Solanum tuberosum receptor-like kinase TMK3 (LOC102579753), mRNA	0	hypothetical protein H5410_000393	0	serine/threonine protein kinase [Streptomyces bingchenggensis BCW-1]	1.3e-21	Serine/threonine protein kinase	5.76e-62	COG0515@1|root,2QPQ4@2759|Eukaryota,37HPF@33090|Viridiplantae,3G88X@35493|Streptophyta,44G8P@71274|asterids	6.24e-208	Receptor-like kinase TMK3 OS=Arabidopsis thaliana OX=3702 GN=TMK3 PE=1 SV=1	1.89e-132	PK_Tyr_Ser-Thr & Pkinase & LRR_8
PB.103.4	ko:K00924	GO:0003674,GO:0003824,GO:0004672,GO:0004674,GO:0004675,GO:0004888,GO:0005575,GO:0005576,GO:0005623,GO:0005886,GO:0006464,GO:0006468,GO:0006793,GO:0006796,GO:0006807,GO:0007154,GO:0007165,GO:0007166,GO:0007167,GO:0007178,GO:0008150,GO:0008152,GO:0009987,GO:0016020,GO:0016301,GO:0016310,GO:0016740,GO:0016772,GO:0016773,GO:0019199,GO:0019538,GO:0023052,GO:0036211,GO:0038023,GO:0043170,GO:0043412,GO:…	PREDICTED: Solanum tuberosum receptor-like kinase TMK3 (LOC102579753), mRNA	0	hypothetical protein H5410_000393	0	serine/threonine protein kinase [Streptomyces bingchenggensis BCW-1]	5.9e-23	Serine/threonine protein kinase	4.67e-64	COG0515@1|root,2QPQ4@2759|Eukaryota,37HPF@33090|Viridiplantae,3G88X@35493|Streptophyta,44G8P@71274|asterids	3.72e-225	Receptor-like kinase TMK3 OS=Arabidopsis thaliana OX=3702 GN=TMK3 PE=1 SV=1	1.68e-144	PK_Tyr_Ser-Thr & Pkinase
PB.104.1	ko:K07179	GO:0003674,GO:0003824,GO:0004672,GO:0006464,GO:0006468,GO:0006793,GO:0006796,GO:0006807,GO:0008150,GO:0008152,GO:0009987,GO:0016301,GO:0016310,GO:0016740,GO:0016772,GO:0016773,GO:0019538,GO:0036211,GO:0043170,GO:0043412,GO:0044237,GO:0044238,GO:0044260,GO:0044267,GO:0071704,GO:0140096,GO:1901564	PREDICTED: Solanum tuberosum serine/threonine-protein kinase rio2 (LOC102579428), mRNA	0	hypothetical protein KY284_000215	0	hypothetical protein N186_05055 [Thermofilum sp. 1910b]	1.35e-60	Serine/threonine protein kinase	1.71e-94	COG0478@1|root,KOG2268@2759|Eukaryota,37MZW@33090|Viridiplantae,3GD34@35493|Streptophyta,44I9B@71274|asterids	4.82e-296	Serine/threonine-protein kinase rio2 OS=Dictyostelium discoideum OX=44689 GN=rio2 PE=3 SV=1	2.81e-133	Rio2_N & RIO1 & ABC1 & APH
PB.104.2	ko:K07179	GO:0003674,GO:0003824,GO:0004672,GO:0006464,GO:0006468,GO:0006793,GO:0006796,GO:0006807,GO:0008150,GO:0008152,GO:0009987,GO:0016301,GO:0016310,GO:0016740,GO:0016772,GO:0016773,GO:0019538,GO:0036211,GO:0043170,GO:0043412,GO:0044237,GO:0044238,GO:0044260,GO:0044267,GO:0071704,GO:0140096,GO:1901564	PREDICTED: Solanum tuberosum serine/threonine-protein kinase rio2 (LOC102579428), mRNA	0	hypothetical protein KY284_000215	0	hypothetical protein N186_05055 [Thermofilum sp. 1910b]	1.35e-60	Serine/threonine protein kinase	1.71e-94	COG0478@1|root,KOG2268@2759|Eukaryota,37MZW@33090|Viridiplantae,3GD34@35493|Streptophyta,44I9B@71274|asterids	4.82e-296	Serine/threonine-protein kinase rio2 OS=Dictyostelium discoideum OX=44689 GN=rio2 PE=3 SV=1	2.81e-133	Rio2_N & RIO1 & ABC1 & APH
PB.104.3	ko:K07179	GO:0003674,GO:0003824,GO:0004672,GO:0006464,GO:0006468,GO:0006793,GO:0006796,GO:0006807,GO:0008150,GO:0008152,GO:0009987,GO:0016301,GO:0016310,GO:0016740,GO:0016772,GO:0016773,GO:0019538,GO:0036211,GO:0043170,GO:0043412,GO:0044237,GO:0044238,GO:0044260,GO:0044267,GO:0071704,GO:0140096,GO:1901564	PREDICTED: Solanum tuberosum serine/threonine-protein kinase rio2 (LOC102579428), mRNA	0	hypothetical protein KY284_000215	0	hypothetical protein N186_05055 [Thermofilum sp. 1910b]	1.35e-60	Serine/threonine protein kinase	1.71e-94	COG0478@1|root,KOG2268@2759|Eukaryota,37MZW@33090|Viridiplantae,3GD34@35493|Streptophyta,44I9B@71274|asterids	4.82e-296	Serine/threonine-protein kinase rio2 OS=Dictyostelium discoideum OX=44689 GN=rio2 PE=3 SV=1	2.81e-133	Rio2_N & RIO1 & ABC1 & APH
PB.105.1	ko:K14827	-	PREDICTED: Solanum tuberosum testis-expressed sequence 10 protein homolog (LOC102580073), mRNA	0	hypothetical protein KY290_003683	0	#N/A	#N/A	Uncharacterized conserved protein	0	KOG2149@1|root,KOG2149@2759|Eukaryota,37NUB@33090|Viridiplantae,3GAZV@35493|Streptophyta,44D8K@71274|asterids	0.0	Testis-expressed protein 10 OS=Homo sapiens OX=9606 GN=TEX10 PE=1 SV=2	4.8e-18	Ipi1_N
PB.105.2	#N/A	#N/A	#N/A	#N/A	#N/A	#N/A	#N/A	#N/A	#N/A	#N/A	#N/A	#N/A	#N/A	#N/A	#N/A
PB.106.1	ko:K17301	-	PREDICTED: Solanum tuberosum coatomer subunit beta-1 (LOC102580399), transcript variant X2, mRNA	0	hypothetical protein H5410_000396	0	#N/A	#N/A	Vesicle coat complex COPI, beta subunit	0	COG5096@1|root,KOG1058@2759|Eukaryota,37KVE@33090|Viridiplantae,3G9TM@35493|Streptophyta,44MPK@71274|asterids	0.0	Coatomer subunit beta-1 OS=Arabidopsis thaliana OX=3702 GN=At4g31480 PE=3 SV=2	0	Adaptin_N & Coatamer_beta_C & Coatomer_b_Cpla
PB.106.2	ko:K17301	-	PREDICTED: Solanum tuberosum coatomer subunit beta-1 (LOC102580399), transcript variant X2, mRNA	0	hypothetical protein H5410_000396	0	#N/A	#N/A	Vesicle coat complex COPI, beta subunit	0	COG5096@1|root,KOG1058@2759|Eukaryota,37KVE@33090|Viridiplantae,3G9TM@35493|Streptophyta,44MPK@71274|asterids	0.0	Coatomer subunit beta-1 OS=Arabidopsis thaliana OX=3702 GN=At4g31480 PE=3 SV=2	0	Adaptin_N & Coatamer_beta_C & Coatomer_b_Cpla
PB.106.3	ko:K17301	-	PREDICTED: Solanum tuberosum coatomer subunit beta-1 (LOC102580399), transcript variant X2, mRNA	0	hypothetical protein H5410_000396	0	#N/A	#N/A	Vesicle coat complex COPI, beta subunit	0	COG5096@1|root,KOG1058@2759|Eukaryota,37KVE@33090|Viridiplantae,3G9TM@35493|Streptophyta,44MPK@71274|asterids	0.0	Coatomer subunit beta-1 OS=Arabidopsis thaliana OX=3702 GN=At4g31480 PE=3 SV=2	0	Adaptin_N & Coatamer_beta_C & Coatomer_b_Cpla
PB.106.4	ko:K17301	-	PREDICTED: Solanum tuberosum coatomer subunit beta-1 (LOC102580399), transcript variant X2, mRNA	0	hypothetical protein H5410_000396	0	#N/A	#N/A	Vesicle coat complex COPI, beta subunit	0	COG5096@1|root,KOG1058@2759|Eukaryota,37KVE@33090|Viridiplantae,3G9TM@35493|Streptophyta,44MPK@71274|asterids	0.0	Coatomer subunit beta-1 OS=Arabidopsis thaliana OX=3702 GN=At4g31480 PE=3 SV=2	0	Adaptin_N & Coatamer_beta_C & Coatomer_b_Cpla
PB.106.5	ko:K17301	-	PREDICTED: Solanum tuberosum coatomer subunit beta-1 (LOC102580399), transcript variant X2, mRNA	0	hypothetical protein H5410_000396	0	#N/A	#N/A	Vesicle coat complex COPI, beta subunit	0	COG5096@1|root,KOG1058@2759|Eukaryota,37KVE@33090|Viridiplantae,3G9TM@35493|Streptophyta,44MPK@71274|asterids	0.0	Coatomer subunit beta-1 OS=Arabidopsis thaliana OX=3702 GN=At4g31480 PE=3 SV=2	0	Adaptin_N & Coatamer_beta_C & Coatomer_b_Cpla
PB.106.6	ko:K17301	-	PREDICTED: Solanum tuberosum coatomer subunit beta-1 (LOC102580399), transcript variant X2, mRNA	0	hypothetical protein H5410_000396	0	#N/A	#N/A	Vesicle coat complex COPI, beta subunit	0	COG5096@1|root,KOG1058@2759|Eukaryota,37KVE@33090|Viridiplantae,3G9TM@35493|Streptophyta,44MPK@71274|asterids	0.0	Coatomer subunit beta-1 OS=Arabidopsis thaliana OX=3702 GN=At4g31480 PE=3 SV=2	0	Adaptin_N & Coatamer_beta_C & Coatomer_b_Cpla
PB.107.1	-	-	Solanum tuberosum cultivar Solyntus chromosome 1	0	hypothetical protein H5410_000419	9.38e-170	#N/A	#N/A	0	2.47e-59	28N60@1|root,2QUR9@2759|Eukaryota,37S47@33090|Viridiplantae,3GH60@35493|Streptophyta,44DXA@71274|asterids	1.21e-145	NDR1/HIN1-like protein 10 OS=Arabidopsis thaliana OX=3702 GN=NHL10 PE=2 SV=1	6.83e-62	LEA_2
PB.108.1	ko:K14561	-	PREDICTED: Solanum tuberosum U3 small nucleolar ribonucleoprotein protein IMP4-like (LOC102582396), mRNA	0	U3 small nucleolar ribonucleoprotein protein IMP4 isoform X2	0	#N/A	#N/A	U3 small nucleolar ribonucleoprotein (snoRNP) component	1e-91	COG2136@1|root,KOG2781@2759|Eukaryota,37N3X@33090|Viridiplantae,3GBRS@35493|Streptophyta,44GST@71274|asterids	1.26e-207	U3 small nucleolar ribonucleoprotein protein IMP4 OS=Rattus norvegicus OX=10116 GN=Imp4 PE=2 SV=1	7.84e-109	Brix
PB.109.1	-	-	Solanum tuberosum cultivar Solyntus chromosome 1	0	hypothetical protein H5410_000412	0	#N/A	#N/A	#N/A	#N/A	2CYPP@1|root,2S4PI@2759|Eukaryota,37WKH@33090|Viridiplantae,3GJ0P@35493|Streptophyta,44R40@71274|asterids	6.64e-184	#N/A	#N/A	#N/A
PB.110.1	ko:K15032	-	Solanum tuberosum cultivar Solyntus chromosome 1	0	hypothetical protein KY289_004029	0	#N/A	#N/A	Mitochondrial transcription termination factor, mTERF	3.61e-18	KOG1267@1|root,KOG1267@2759|Eukaryota,37QC2@33090|Viridiplantae,3GADQ@35493|Streptophyta,44SZR@71274|asterids	1.28e-214	Transcription termination factor MTEF1, chloroplastic OS=Arabidopsis thaliana OX=3702 GN=MTERF1 PE=2 SV=2	3.52e-43	mTERF
PB.111.1	ko:K03386	GO:0003674,GO:0003824,GO:0008150,GO:0008152,GO:0009056,GO:0009636,GO:0009987,GO:0016209,GO:0016491,GO:0016684,GO:0016999,GO:0017001,GO:0017144,GO:0042221,GO:0042737,GO:0042743,GO:0042744,GO:0044237,GO:0044248,GO:0050896,GO:0051186,GO:0051187,GO:0051716,GO:0051920,GO:0055114,GO:0070887,GO:0072593,GO:0097237,GO:0098754,GO:0098869,GO:1990748	PREDICTED: Solanum tuberosum 2-Cys peroxiredoxin BAS1, chloroplastic (LOC102583732), mRNA	0	hypothetical protein KY284_003861	8.78e-168	Peroxiredoxin [Oscillatoria nigro-viridis PCC 7112]	2.65e-112	Alkyl hydroperoxide reductase, thiol specific antioxidant and related enzymes	8.28e-138	COG0450@1|root,KOG0852@2759|Eukaryota,37MJ8@33090|Viridiplantae,3GB77@35493|Streptophyta,44N9T@71274|asterids	7.7e-161	2-Cys peroxiredoxin BAS1-like, chloroplastic OS=Arabidopsis thaliana OX=3702 GN=At5g06290 PE=2 SV=3	2.86e-137	AhpC-TSA & Redoxin & 1-cysPrx_C
PB.111.2	ko:K03386	GO:0003674,GO:0003824,GO:0008150,GO:0008152,GO:0009056,GO:0009636,GO:0009987,GO:0016209,GO:0016491,GO:0016684,GO:0016999,GO:0017001,GO:0017144,GO:0042221,GO:0042737,GO:0042743,GO:0042744,GO:0044237,GO:0044248,GO:0050896,GO:0051186,GO:0051187,GO:0051716,GO:0051920,GO:0055114,GO:0070887,GO:0072593,GO:0097237,GO:0098754,GO:0098869,GO:1990748	PREDICTED: Solanum tuberosum 2-Cys peroxiredoxin BAS1, chloroplastic (LOC102583732), mRNA	0	hypothetical protein H5410_000426	0	Peroxiredoxin [Oscillatoria nigro-viridis PCC 7112]	1.19e-112	Alkyl hydroperoxide reductase, thiol specific antioxidant and related enzymes	1.24e-138	COG0450@1|root,KOG0852@2759|Eukaryota,37MJ8@33090|Viridiplantae,3GB77@35493|Streptophyta,44N9T@71274|asterids	1.68e-187	2-Cys peroxiredoxin BAS1-like, chloroplastic OS=Arabidopsis thaliana OX=3702 GN=At5g06290 PE=2 SV=3	8.46e-138	AhpC-TSA & Redoxin & 1-cysPrx_C
PB.111.3	ko:K03386	GO:0003674,GO:0003824,GO:0008150,GO:0008152,GO:0009056,GO:0009636,GO:0009987,GO:0016209,GO:0016491,GO:0016684,GO:0016999,GO:0017001,GO:0017144,GO:0042221,GO:0042737,GO:0042743,GO:0042744,GO:0044237,GO:0044248,GO:0050896,GO:0051186,GO:0051187,GO:0051716,GO:0051920,GO:0055114,GO:0070887,GO:0072593,GO:0097237,GO:0098754,GO:0098869,GO:1990748	PREDICTED: Solanum tuberosum 2-Cys peroxiredoxin BAS1, chloroplastic (LOC102583732), mRNA	0	hypothetical protein H5410_000426	0	Peroxiredoxin [Oscillatoria nigro-viridis PCC 7112]	1.19e-112	Alkyl hydroperoxide reductase, thiol specific antioxidant and related enzymes	1.24e-138	COG0450@1|root,KOG0852@2759|Eukaryota,37MJ8@33090|Viridiplantae,3GB77@35493|Streptophyta,44N9T@71274|asterids	1.68e-187	2-Cys peroxiredoxin BAS1-like, chloroplastic OS=Arabidopsis thaliana OX=3702 GN=At5g06290 PE=2 SV=3	8.46e-138	AhpC-TSA & Redoxin & 1-cysPrx_C
PB.112.1	ko:K12581	-	Solanum tuberosum cultivar Solyntus chromosome 1	0	hypothetical protein KY284_000242	0	#N/A	#N/A	mRNA deadenylase subunit	2.61e-115	COG5228@1|root,KOG0304@2759|Eukaryota,37Z9W@33090|Viridiplantae,3GPA3@35493|Streptophyta,44MN6@71274|asterids	1.32e-201	Probable CCR4-associated factor 1 homolog 9 OS=Arabidopsis thaliana OX=3702 GN=CAF1-9 PE=2 SV=1	2.63e-116	CAF1
PB.112.2	ko:K12581	-	Solanum tuberosum cultivar Solyntus chromosome 1	0	hypothetical protein KY284_000242	0	#N/A	#N/A	mRNA deadenylase subunit	1.61e-115	COG5228@1|root,KOG0304@2759|Eukaryota,37Z9W@33090|Viridiplantae,3GPA3@35493|Streptophyta,44MN6@71274|asterids	4.45e-201	Probable CCR4-associated factor 1 homolog 9 OS=Arabidopsis thaliana OX=3702 GN=CAF1-9 PE=2 SV=1	2.13e-116	CAF1
PB.112.3	ko:K12581	-	Solanum tuberosum cultivar Solyntus chromosome 1	0	hypothetical protein KY284_000242	0	#N/A	#N/A	mRNA deadenylase subunit	2.01e-115	COG5228@1|root,KOG0304@2759|Eukaryota,37Z9W@33090|Viridiplantae,3GPA3@35493|Streptophyta,44MN6@71274|asterids	4.27e-201	Probable CCR4-associated factor 1 homolog 9 OS=Arabidopsis thaliana OX=3702 GN=CAF1-9 PE=2 SV=1	2.32e-116	CAF1
PB.113.1	ko:K10704	-	Solanum tuberosum ubiquitin-conjugating enzyme family protein-like protein mRNA, complete cds	0	ubiquitin-conjugating enzyme E2 variant 1C	8.85e-106	#N/A	#N/A	Ubiquitin-conjugating enzyme E2	4e-53	KOG0896@1|root,KOG0896@2759|Eukaryota,37JUG@33090|Viridiplantae,3GNZK@35493|Streptophyta,44UPS@71274|asterids	2.76e-108	Ubiquitin-conjugating enzyme E2 variant 1D OS=Arabidopsis thaliana OX=3702 GN=UEV1D PE=1 SV=1	2.63e-103	UQ_con
PB.113.2	ko:K10704	-	Solanum tuberosum ubiquitin-conjugating enzyme family protein-like protein mRNA, complete cds	0	ubiquitin-conjugating enzyme E2 variant 1C	8.85e-106	#N/A	#N/A	Ubiquitin-conjugating enzyme E2	4e-53	KOG0896@1|root,KOG0896@2759|Eukaryota,37JUG@33090|Viridiplantae,3GNZK@35493|Streptophyta,44UPS@71274|asterids	2.76e-108	Ubiquitin-conjugating enzyme E2 variant 1D OS=Arabidopsis thaliana OX=3702 GN=UEV1D PE=1 SV=1	2.63e-103	UQ_con
PB.114.1	-	GO:0003674,GO:0005488,GO:0005515,GO:0005575,GO:0005622,GO:0005623,GO:0005737,GO:0006996,GO:0008150,GO:0009507,GO:0009526,GO:0009527,GO:0009532,GO:0009536,GO:0009570,GO:0009657,GO:0009658,GO:0009707,GO:0009941,GO:0009987,GO:0010020,GO:0016020,GO:0016043,GO:0019867,GO:0019898,GO:0031090,GO:0031312,GO:0031967,GO:0031968,GO:0031969,GO:0031975,GO:0035452,GO:0042170,GO:0043226,GO:0043227,GO:0043229,GO:…	PREDICTED: Solanum tuberosum protein ACCUMULATION AND REPLICATION OF CHLOROPLASTS 3 (LOC102589445), mRNA	0	PREDICTED: protein ACCUMULATION AND REPLICATION OF CHLOROPLASTS 3	0	phosphatidylinositol-4-phosphate 5-kinase [Bacteroides thetaiotaomicron VPI-5482]	3.69e-17	Junctional membrane complex protein Junctophilin and related MORN repeat proteins	3.41e-10	COG4642@1|root,KOG0231@2759|Eukaryota,37I0Q@33090|Viridiplantae,3G90Z@35493|Streptophyta,44HPW@71274|asterids	0.0	Protein ACCUMULATION AND REPLICATION OF CHLOROPLASTS 3, chloroplastic OS=Arabidopsis thaliana OX=3702 GN=ARC3 PE=1 SV=2	0	#N/A
PB.115.1	ko:K06620,ko:K12590	GO:0003674,GO:0003676,GO:0003677,GO:0005488,GO:0006355,GO:0008150,GO:0009889,GO:0009891,GO:0009893,GO:0010468,GO:0010556,GO:0010557,GO:0010604,GO:0010628,GO:0019219,GO:0019222,GO:0031323,GO:0031325,GO:0031326,GO:0031328,GO:0045787,GO:0045893,GO:0045935,GO:0048518,GO:0048522,GO:0050789,GO:0050794,GO:0051171,GO:0051173,GO:0051252,GO:0051254,GO:0051445,GO:0051446,GO:0051726,GO:0060255,GO:0065007,GO:…	PREDICTED: Solanum tuberosum transcription factor E2FA (LOC102584400), transcript variant X1, mRNA	0	hypothetical protein H5410_000428	0	#N/A	#N/A	Transcription factor E2F/dimerization partner (TDP)	7.33e-25	KOG2577@1|root,KOG2577@2759|Eukaryota,37JWT@33090|Viridiplantae,3GAZ5@35493|Streptophyta,44CTH@71274|asterids	1.55e-171	Transcription factor E2FA OS=Arabidopsis thaliana OX=3702 GN=E2FA PE=1 SV=1	1.97e-90	E2F_TDP & E2F_CC-MB
PB.115.2	ko:K06620,ko:K12590	GO:0003674,GO:0003676,GO:0003677,GO:0005488,GO:0006355,GO:0008150,GO:0009889,GO:0009891,GO:0009893,GO:0010468,GO:0010556,GO:0010557,GO:0010604,GO:0010628,GO:0019219,GO:0019222,GO:0031323,GO:0031325,GO:0031326,GO:0031328,GO:0045787,GO:0045893,GO:0045935,GO:0048518,GO:0048522,GO:0050789,GO:0050794,GO:0051171,GO:0051173,GO:0051252,GO:0051254,GO:0051445,GO:0051446,GO:0051726,GO:0060255,GO:0065007,GO:…	PREDICTED: Solanum tuberosum transcription factor E2FA (LOC102584400), transcript variant X1, mRNA	0	PREDICTED: transcription factor E2FA isoform X1	0	#N/A	#N/A	Transcription factor E2F/dimerization partner (TDP)	6.64e-28	KOG2577@1|root,KOG2577@2759|Eukaryota,37JWT@33090|Viridiplantae,3GAZ5@35493|Streptophyta,44CTH@71274|asterids	1.57e-314	Transcription factor E2FA OS=Arabidopsis thaliana OX=3702 GN=E2FA PE=1 SV=1	1.06e-162	E2F_TDP & E2F_CC-MB
PB.116.1	-	-	PREDICTED: Solanum tuberosum tobamovirus multiplication protein 3 (LOC102590101), mRNA	0	hypothetical protein H5410_000460	0	#N/A	#N/A	#N/A	#N/A	28IAY@1|root,2QQMF@2759|Eukaryota,37I89@33090|Viridiplantae,3G7YB@35493|Streptophyta,44PUK@71274|asterids	5.25e-204	Tobamovirus multiplication protein 3 OS=Nicotiana tabacum OX=4097 GN=TOM3 PE=1 SV=1	0	THH1_TOM1-3_dom
PB.117.1	ko:K01899	GO:0003674,GO:0003824,GO:0004774,GO:0004775,GO:0004776,GO:0005488,GO:0005507,GO:0005575,GO:0005618,GO:0005622,GO:0005623,GO:0005737,GO:0005739,GO:0005759,GO:0006082,GO:0006091,GO:0006099,GO:0006101,GO:0006104,GO:0006105,GO:0006139,GO:0006163,GO:0006637,GO:0006725,GO:0006732,GO:0006753,GO:0006790,GO:0006793,GO:0006796,GO:0006807,GO:0008150,GO:0008152,GO:0009060,GO:0009117,GO:0009150,GO:0009259,GO:…	Solanum tuberosum clone 167F09 succinyl-CoA ligase alpha 1 subunit-like mRNA, complete cds	0	hypothetical protein KY289_000239	0	succinyl-CoA synthetase subunit alpha [Parvibaculum lavamentivorans DS-1]	1.33e-150	Succinyl-CoA synthetase, alpha subunit	0	COG0074@1|root,KOG1255@2759|Eukaryota,37I24@33090|Viridiplantae,3G8BF@35493|Streptophyta,44QJJ@71274|asterids	6.16e-236	Succinate--CoA ligase [ADP-forming] subunit alpha-1, mitochondrial OS=Solanum lycopersicum OX=4081 GN=SCOA PE=1 SV=1	0	CoA_binding & Succ_CoA_lig & Ligase_CoA
PB.117.2	ko:K01899	GO:0003674,GO:0003824,GO:0004774,GO:0004775,GO:0004776,GO:0005488,GO:0005507,GO:0005575,GO:0005618,GO:0005622,GO:0005623,GO:0005737,GO:0005739,GO:0005759,GO:0006082,GO:0006091,GO:0006099,GO:0006101,GO:0006104,GO:0006105,GO:0006139,GO:0006163,GO:0006637,GO:0006725,GO:0006732,GO:0006753,GO:0006790,GO:0006793,GO:0006796,GO:0006807,GO:0008150,GO:0008152,GO:0009060,GO:0009117,GO:0009150,GO:0009259,GO:…	Solanum tuberosum clone 167F09 succinyl-CoA ligase alpha 1 subunit-like mRNA, complete cds	0	hypothetical protein KY289_000239	0	succinyl-CoA synthetase subunit alpha [Parvibaculum lavamentivorans DS-1]	1.33e-150	Succinyl-CoA synthetase, alpha subunit	0	COG0074@1|root,KOG1255@2759|Eukaryota,37I24@33090|Viridiplantae,3G8BF@35493|Streptophyta,44QJJ@71274|asterids	6.16e-236	Succinate--CoA ligase [ADP-forming] subunit alpha-1, mitochondrial OS=Solanum lycopersicum OX=4081 GN=SCOA PE=1 SV=1	0	CoA_binding & Succ_CoA_lig & Ligase_CoA
PB.118.1	ko:K07937	GO:0005575,GO:0005622,GO:0005623,GO:0005737,GO:0005794,GO:0012505,GO:0043226,GO:0043227,GO:0043229,GO:0043231,GO:0044424,GO:0044444,GO:0044464	PREDICTED: Solanum pennellii ADP-ribosylation factor 2-like (LOC107008247), mRNA	1.24e-170	hypothetical protein PRUPE_3G287000	2.24e-77	small GTP-binding protein [Candidatus Korarchaeum cryptofilum OPF8]	7.92e-25	GTP-binding ADP-ribosylation factor Arf1	7.51e-78	COG1100@1|root,KOG0070@2759|Eukaryota,37PTM@33090|Viridiplantae,3GNIU@35493|Streptophyta,44MMK@71274|asterids	3.29e-75	ADP-ribosylation factor OS=Zea mays OX=4577 GN=ARF1 PE=2 SV=2	3.01e-78	Arf & SRPRB & Roc & Ras & Gtr1_RagA & G-alpha
PB.118.2	#N/A	#N/A	#N/A	#N/A	#N/A	#N/A	#N/A	#N/A	#N/A	#N/A	#N/A	#N/A	#N/A	#N/A	#N/A
PB.118.3	ko:K07937	GO:0005575,GO:0005622,GO:0005623,GO:0005737,GO:0005794,GO:0012505,GO:0043226,GO:0043227,GO:0043229,GO:0043231,GO:0044424,GO:0044444,GO:0044464	Solanum tuberosum ADP-ribosylation factor 2-like (LOC102596328), mRNA_x005f_x0001_DQ191645.1 Solanum tuberosum unknown mRNA	0	ADP-ribosylation factor 2	2.78e-131	small GTP-binding protein [Candidatus Korarchaeum cryptofilum OPF8]	3.76e-36	GTP-binding ADP-ribosylation factor Arf1	3.72e-131	COG1100@1|root,KOG0070@2759|Eukaryota,37PTM@33090|Viridiplantae,3GNIU@35493|Streptophyta,44MMK@71274|asterids	9.54e-128	ADP-ribosylation factor 2 OS=Oryza sativa subsp. japonica OX=39947 GN=ARF PE=2 SV=2	1.61e-132	Arf & SRPRB & Roc & Ras & Gtr1_RagA & G-alpha
PB.118.4	ko:K07937	GO:0005575,GO:0005622,GO:0005623,GO:0005737,GO:0005794,GO:0012505,GO:0043226,GO:0043227,GO:0043229,GO:0043231,GO:0044424,GO:0044444,GO:0044464	Solanum tuberosum ADP-ribosylation factor 2-like (LOC102596328), mRNA_x005f_x0001_DQ191645.1 Solanum tuberosum unknown mRNA	0	ADP-ribosylation factor 2	2.78e-131	small GTP-binding protein [Candidatus Korarchaeum cryptofilum OPF8]	3.76e-36	GTP-binding ADP-ribosylation factor Arf1	3.72e-131	COG1100@1|root,KOG0070@2759|Eukaryota,37PTM@33090|Viridiplantae,3GNIU@35493|Streptophyta,44MMK@71274|asterids	9.54e-128	ADP-ribosylation factor 2 OS=Oryza sativa subsp. japonica OX=39947 GN=ARF PE=2 SV=2	1.61e-132	Arf & SRPRB & Roc & Ras & Gtr1_RagA & G-alpha
PB.118.5	ko:K07937	GO:0005575,GO:0005622,GO:0005623,GO:0005737,GO:0005794,GO:0012505,GO:0043226,GO:0043227,GO:0043229,GO:0043231,GO:0044424,GO:0044444,GO:0044464	Solanum tuberosum ADP-ribosylation factor 2-like (LOC102596328), mRNA_x005f_x0001_DQ191645.1 Solanum tuberosum unknown mRNA	0	ADP-ribosylation factor 2	2.78e-131	small GTP-binding protein [Candidatus Korarchaeum cryptofilum OPF8]	3.76e-36	GTP-binding ADP-ribosylation factor Arf1	3.72e-131	COG1100@1|root,KOG0070@2759|Eukaryota,37PTM@33090|Viridiplantae,3GNIU@35493|Streptophyta,44MMK@71274|asterids	9.54e-128	ADP-ribosylation factor 2 OS=Oryza sativa subsp. japonica OX=39947 GN=ARF PE=2 SV=2	1.61e-132	Arf & SRPRB & Roc & Ras & Gtr1_RagA & G-alpha
PB.118.6	ko:K07937	GO:0005575,GO:0005622,GO:0005623,GO:0005737,GO:0005794,GO:0012505,GO:0043226,GO:0043227,GO:0043229,GO:0043231,GO:0044424,GO:0044444,GO:0044464	Solanum tuberosum ADP-ribosylation factor 2-like (LOC102596328), mRNA_x005f_x0001_DQ191645.1 Solanum tuberosum unknown mRNA	0	ADP-ribosylation factor 2	4.01e-122	small GTP-binding protein [Candidatus Korarchaeum cryptofilum OPF8]	4.18e-35	GTP-binding ADP-ribosylation factor Arf1	1.39e-122	COG1100@1|root,KOG0070@2759|Eukaryota,37PTM@33090|Viridiplantae,3GNIU@35493|Streptophyta,44MMK@71274|asterids	1.47e-119	ADP-ribosylation factor 1 OS=Salix bakko OX=72444 GN=ARF1 PE=2 SV=3	1.34e-123	Arf & SRPRB & Roc & Ras & Gtr1_RagA & G-alpha
PB.119.1	-	-	PREDICTED: Solanum tuberosum F-box protein At1g70590-like (LOC102591124), mRNA	0	hypothetical protein H5410_000470	0	hypothetical protein Aasi_0851 [Candidatus Amoebophilus asiaticus 5a2]	7.12e-23	#N/A	#N/A	COG0790@1|root,KOG1550@2759|Eukaryota,37R69@33090|Viridiplantae,3GF1S@35493|Streptophyta,44BIV@71274|asterids	9.09e-156	F-box protein At1g70590 OS=Arabidopsis thaliana OX=3702 GN=At1g70590 PE=2 SV=1	3.38e-119	Sel1
PB.120.1	-	-	PREDICTED: Solanum tuberosum uncharacterized LOC102597312 (LOC102597312), transcript variant X3, mRNA	0	PREDICTED: uncharacterized protein LOC102597312 isoform X1	0	#N/A	#N/A	#N/A	#N/A	28N8H@1|root,2QUTS@2759|Eukaryota,37IGG@33090|Viridiplantae,3G845@35493|Streptophyta,44HIZ@71274|asterids	1.86e-239	#N/A	#N/A	DUF220
PB.120.2	-	-	PREDICTED: Solanum tuberosum uncharacterized LOC102597312 (LOC102597312), transcript variant X3, mRNA	0	PREDICTED: uncharacterized protein LOC102597312 isoform X1	0	#N/A	#N/A	#N/A	#N/A	28N8H@1|root,2QUTS@2759|Eukaryota,37IGG@33090|Viridiplantae,3G845@35493|Streptophyta,44HIZ@71274|asterids	1.86e-239	#N/A	#N/A	DUF220
PB.120.3	-	-	PREDICTED: Solanum tuberosum uncharacterized LOC102597312 (LOC102597312), transcript variant X3, mRNA	0	PREDICTED: uncharacterized protein LOC102597312 isoform X1	0	#N/A	#N/A	#N/A	#N/A	28N8H@1|root,2QUTS@2759|Eukaryota,37IGG@33090|Viridiplantae,3G845@35493|Streptophyta,44HIZ@71274|asterids	3.06e-192	#N/A	#N/A	DUF220
PB.121.1	-	-	PREDICTED: Solanum tuberosum uncharacterized LOC102598621 (LOC102598621), transcript variant X4, mRNA	1.02e-170	PREDICTED: uncharacterized protein LOC102598621 isoform X2	6.14e-76	#N/A	#N/A	0	1.11e-37	COG0328@1|root,2QRR5@2759|Eukaryota,37QNM@33090|Viridiplantae,3G9CP@35493|Streptophyta,44QTP@71274|asterids	9.25e-75	#N/A	#N/A	#N/A
PB.121.2	-	-	PREDICTED: Solanum tuberosum uncharacterized LOC102598621 (LOC102598621), transcript variant X3, mRNA	0	PREDICTED: uncharacterized protein LOC102598621 isoform X2	0	ribonuclease H [Desulfarculus baarsii DSM 2075]	4.13e-26	0	8.59e-95	COG0328@1|root,2QRR5@2759|Eukaryota,37QNM@33090|Viridiplantae,3G9CP@35493|Streptophyta,44QTP@71274|asterids	1.63e-210	Uncharacterized protein Mb2253c OS=Mycobacterium bovis (strain ATCC BAA-935 / AF2122/97) OX=233413 GN=BQ2027_MB2253C PE=4 SV=1	6.02e-20	RVT_3
PB.121.3	-	-	PREDICTED: Solanum tuberosum uncharacterized LOC102598621 (LOC102598621), transcript variant X2, mRNA	0	PREDICTED: uncharacterized protein LOC102598621 isoform X1	0	ribonuclease H [Desulfobulbus propionicus DSM 2032]	8.8e-26	0	1.87e-93	COG0328@1|root,2QRR5@2759|Eukaryota,37QNM@33090|Viridiplantae,3G9CP@35493|Streptophyta,44QTP@71274|asterids	2.67e-220	Uncharacterized protein Mb2253c OS=Mycobacterium bovis (strain ATCC BAA-935 / AF2122/97) OX=233413 GN=BQ2027_MB2253C PE=4 SV=1	6.19e-20	RVT_3
PB.121.4	-	-	PREDICTED: Nicotiana tomentosiformis uncharacterized LOC104085133 (LOC104085133), transcript variant X3, mRNA	0	PREDICTED: uncharacterized protein LOC102598621 isoform X2	0	fructose-2,6-bisphosphatase [Saccharomonospora viridis DSM 43017]	6.7e-26	0	3.5e-96	COG0328@1|root,2QRR5@2759|Eukaryota,37QNM@33090|Viridiplantae,3G9CP@35493|Streptophyta,44QTP@71274|asterids	4.06e-204	Uncharacterized protein Mb2253c OS=Mycobacterium bovis (strain ATCC BAA-935 / AF2122/97) OX=233413 GN=BQ2027_MB2253C PE=4 SV=1	3.66e-20	RVT_3
PB.121.5	#N/A	#N/A	#N/A	#N/A	#N/A	#N/A	#N/A	#N/A	#N/A	#N/A	#N/A	#N/A	#N/A	#N/A	#N/A
PB.122.1	ko:K15014	GO:0005575,GO:0005622,GO:0005623,GO:0005737,GO:0005773,GO:0005774,GO:0016020,GO:0031090,GO:0043226,GO:0043227,GO:0043229,GO:0043231,GO:0044422,GO:0044424,GO:0044437,GO:0044444,GO:0044446,GO:0044464,GO:0098588,GO:0098805	Solanum tuberosum mRNA for equilibrative nucleoside transporter 1 (ent1 gene), cultivar Desiree	0	hypothetical protein H5410_000485	0	#N/A	#N/A	Nucleoside transporter	2.25e-36	KOG1479@1|root,KOG1479@2759|Eukaryota,37RUQ@33090|Viridiplantae,3GEUC@35493|Streptophyta,44FK2@71274|asterids	1.16e-282	Equilibrative nucleotide transporter 1 OS=Arabidopsis thaliana OX=3702 GN=ENT1 PE=1 SV=1	0	Nucleoside_tran
PB.123.1	ko:K02978	GO:0000028,GO:0003674,GO:0003735,GO:0005198,GO:0005575,GO:0005622,GO:0005623,GO:0005737,GO:0005829,GO:0005840,GO:0005886,GO:0006412,GO:0006518,GO:0006807,GO:0006996,GO:0008150,GO:0008152,GO:0009058,GO:0009059,GO:0009987,GO:0010467,GO:0015935,GO:0016020,GO:0016043,GO:0019538,GO:0022607,GO:0022613,GO:0022618,GO:0022626,GO:0022627,GO:0032991,GO:0034622,GO:0034641,GO:0034645,GO:0042254,GO:0042255,GO:…	PREDICTED: Solanum tuberosum 40S ribosomal protein S27-2 (LOC102600252), transcript variant X1, mRNA	1.04e-160	hypothetical protein H5410_000491	1.65e-70	30S ribosomal protein S27E [Candidatus Korarchaeum cryptofilum OPF8]	5.96e-08	40s ribosomal protein S27	1.18e-35	COG2051@1|root,KOG1779@2759|Eukaryota,37V9A@33090|Viridiplantae,3GJN1@35493|Streptophyta	1.92e-57	40S ribosomal protein S27-2 OS=Arabidopsis thaliana OX=3702 GN=RPS27B PE=2 SV=2	4.03e-56	Ribosomal_S27e
PB.123.2	#N/A	#N/A	#N/A	#N/A	#N/A	#N/A	#N/A	#N/A	#N/A	#N/A	#N/A	#N/A	#N/A	#N/A	#N/A
PB.123.3	ko:K02978	GO:0000028,GO:0003674,GO:0003735,GO:0005198,GO:0005575,GO:0005622,GO:0005623,GO:0005737,GO:0005829,GO:0005840,GO:0005886,GO:0006412,GO:0006518,GO:0006807,GO:0006996,GO:0008150,GO:0008152,GO:0009058,GO:0009059,GO:0009987,GO:0010467,GO:0015935,GO:0016020,GO:0016043,GO:0019538,GO:0022607,GO:0022613,GO:0022618,GO:0022626,GO:0022627,GO:0032991,GO:0034622,GO:0034641,GO:0034645,GO:0042254,GO:0042255,GO:…	PREDICTED: Solanum tuberosum 40S ribosomal protein S27-2 (LOC102600252), transcript variant X1, mRNA	1.72e-158	hypothetical protein H5410_000491	1.84e-70	30S ribosomal protein S27E [Candidatus Korarchaeum cryptofilum OPF8]	6.24e-08	40s ribosomal protein S27	1.14e-35	COG2051@1|root,KOG1779@2759|Eukaryota,37V9A@33090|Viridiplantae,3GJN1@35493|Streptophyta	1.84e-57	40S ribosomal protein S27-2 OS=Arabidopsis thaliana OX=3702 GN=RPS27B PE=2 SV=2	4.51e-56	Ribosomal_S27e
PB.124.1	-	-	PREDICTED: Solanum tuberosum uncharacterized LOC102599594 (LOC102599594), mRNA	0	hypothetical protein H5410_000489	0	protein of unknown function DUF1350 [Stanieria cyanosphaera PCC 7437]	1.33e-46	#N/A	#N/A	COG1084@1|root,2QSXN@2759|Eukaryota,37KX8@33090|Viridiplantae,3GAHW@35493|Streptophyta,44IK4@71274|asterids	7.48e-313	#N/A	#N/A	DUF1350
PB.124.2	-	-	PREDICTED: Solanum tuberosum uncharacterized LOC102599594 (LOC102599594), mRNA	0	hypothetical protein H5410_000489	0	protein of unknown function DUF1350 [Stanieria cyanosphaera PCC 7437]	1.33e-46	#N/A	#N/A	COG1084@1|root,2QSXN@2759|Eukaryota,37KX8@33090|Viridiplantae,3GAHW@35493|Streptophyta,44IK4@71274|asterids	7.48e-313	#N/A	#N/A	DUF1350
PB.124.3	-	-	PREDICTED: Solanum tuberosum uncharacterized LOC102599594 (LOC102599594), mRNA	0	hypothetical protein H5410_000489	0	protein of unknown function DUF1350 [Stanieria cyanosphaera PCC 7437]	1.33e-46	#N/A	#N/A	COG1084@1|root,2QSXN@2759|Eukaryota,37KX8@33090|Viridiplantae,3GAHW@35493|Streptophyta,44IK4@71274|asterids	7.48e-313	#N/A	#N/A	DUF1350
PB.125.1	-	GO:0005575,GO:0005622,GO:0005623,GO:0005737,GO:0005773,GO:0043226,GO:0043227,GO:0043229,GO:0043231,GO:0044424,GO:0044444,GO:0044464	PREDICTED: Solanum tuberosum uncharacterized protein At4g14100-like (LOC102600811), mRNA	0	hypothetical protein H5410_000492	7.77e-158	#N/A	#N/A	#N/A	#N/A	28P6Y@1|root,2QVTW@2759|Eukaryota,37NVI@33090|Viridiplantae,3GB8Q@35493|Streptophyta,44FMA@71274|asterids	4.12e-162	Uncharacterized protein At4g14100 OS=Arabidopsis thaliana OX=3702 GN=At4g14100 PE=2 SV=1	2.39e-92	#N/A
PB.125.2	-	GO:0005575,GO:0005622,GO:0005623,GO:0005737,GO:0005773,GO:0043226,GO:0043227,GO:0043229,GO:0043231,GO:0044424,GO:0044444,GO:0044464	PREDICTED: Solanum tuberosum uncharacterized protein At4g14100-like (LOC102600811), mRNA	0	hypothetical protein H5410_000492	5.6e-158	#N/A	#N/A	#N/A	#N/A	28P6Y@1|root,2QVTW@2759|Eukaryota,37NVI@33090|Viridiplantae,3GB8Q@35493|Streptophyta,44FMA@71274|asterids	2.25e-162	Uncharacterized protein At4g14100 OS=Arabidopsis thaliana OX=3702 GN=At4g14100 PE=2 SV=1	1.37e-92	#N/A
PB.126.1	ko:K02978	GO:0000028,GO:0003674,GO:0003735,GO:0005198,GO:0005575,GO:0005622,GO:0005623,GO:0005737,GO:0005829,GO:0005840,GO:0005886,GO:0006412,GO:0006518,GO:0006807,GO:0006996,GO:0008150,GO:0008152,GO:0009058,GO:0009059,GO:0009987,GO:0010467,GO:0015935,GO:0016020,GO:0016043,GO:0019538,GO:0022607,GO:0022613,GO:0022618,GO:0022626,GO:0022627,GO:0032991,GO:0034622,GO:0034641,GO:0034645,GO:0042254,GO:0042255,GO:…	PREDICTED: Solanum tuberosum 40S ribosomal protein S27-2 (LOC102599917), mRNA	1.06e-155	hypothetical protein H5410_000491	2.15e-77	30S ribosomal protein S27E [Candidatus Korarchaeum cryptofilum OPF8]	5.21e-08	40s ribosomal protein S27	1.21e-35	COG2051@1|root,KOG1779@2759|Eukaryota,37V9A@33090|Viridiplantae,3GJN1@35493|Streptophyta	1.16e-57	40S ribosomal protein S27-2 OS=Arabidopsis thaliana OX=3702 GN=RPS27B PE=2 SV=2	3.33e-56	Ribosomal_S27e
PB.126.2	#N/A	#N/A	#N/A	#N/A	#N/A	#N/A	#N/A	#N/A	#N/A	#N/A	#N/A	#N/A	#N/A	#N/A	#N/A
PB.126.3	ko:K02978	GO:0000028,GO:0003674,GO:0003735,GO:0005198,GO:0005575,GO:0005622,GO:0005623,GO:0005737,GO:0005829,GO:0005840,GO:0005886,GO:0006412,GO:0006518,GO:0006807,GO:0006996,GO:0008150,GO:0008152,GO:0009058,GO:0009059,GO:0009987,GO:0010467,GO:0015935,GO:0016020,GO:0016043,GO:0019538,GO:0022607,GO:0022613,GO:0022618,GO:0022626,GO:0022627,GO:0032991,GO:0034622,GO:0034641,GO:0034645,GO:0042254,GO:0042255,GO:…	PREDICTED: Solanum tuberosum 40S ribosomal protein S27-2 (LOC102599917), mRNA	1.06e-155	hypothetical protein H5410_000491	2.15e-77	30S ribosomal protein S27E [Candidatus Korarchaeum cryptofilum OPF8]	5.21e-08	40s ribosomal protein S27	1.21e-35	COG2051@1|root,KOG1779@2759|Eukaryota,37V9A@33090|Viridiplantae,3GJN1@35493|Streptophyta	1.16e-57	40S ribosomal protein S27-2 OS=Arabidopsis thaliana OX=3702 GN=RPS27B PE=2 SV=2	3.33e-56	Ribosomal_S27e
PB.126.4	#N/A	#N/A	#N/A	#N/A	#N/A	#N/A	#N/A	#N/A	#N/A	#N/A	#N/A	#N/A	#N/A	#N/A	#N/A
PB.127.1	ko:K04498	GO:0000003,GO:0003006,GO:0003674,GO:0003824,GO:0004402,GO:0006325,GO:0006464,GO:0006473,GO:0006475,GO:0006807,GO:0006996,GO:0007275,GO:0008080,GO:0008150,GO:0008152,GO:0009791,GO:0009908,GO:0009987,GO:0016043,GO:0016407,GO:0016410,GO:0016569,GO:0016570,GO:0016573,GO:0016740,GO:0016746,GO:0016747,GO:0018193,GO:0018205,GO:0018393,GO:0018394,GO:0019538,GO:0022414,GO:0032501,GO:0032502,GO:0034212,GO:…	PREDICTED: Solanum tuberosum histone acetyltransferase HAC1-like (LOC102601489), transcript variant X3, mRNA	0	hypothetical protein KY284_003866	0	#N/A	#N/A	CREB binding protein/P300 and related TAZ Zn-finger proteins	1.45e-47	COG5076@1|root,KOG1778@2759|Eukaryota,37Q3J@33090|Viridiplantae,3GB7Y@35493|Streptophyta,44NCH@71274|asterids	1.33e-170	Histone acetyltransferase HAC1 OS=Arabidopsis thaliana OX=3702 GN=HAC1 PE=1 SV=2	0	ZZ & zf-TAZ
PB.127.2	ko:K04498	GO:0000003,GO:0003006,GO:0003674,GO:0003824,GO:0004402,GO:0006325,GO:0006464,GO:0006473,GO:0006475,GO:0006807,GO:0006996,GO:0007275,GO:0008080,GO:0008150,GO:0008152,GO:0009791,GO:0009908,GO:0009987,GO:0016043,GO:0016407,GO:0016410,GO:0016569,GO:0016570,GO:0016573,GO:0016740,GO:0016746,GO:0016747,GO:0018193,GO:0018205,GO:0018393,GO:0018394,GO:0019538,GO:0022414,GO:0032501,GO:0032502,GO:0034212,GO:…	PREDICTED: Solanum tuberosum histone acetyltransferase HAC1-like (LOC102601489), transcript variant X3, mRNA	0	histone acetyltransferase HAC1-like isoform X2	0	#N/A	#N/A	CREB binding protein/P300 and related TAZ Zn-finger proteins	1.34e-155	COG5076@1|root,KOG1778@2759|Eukaryota,37Q3J@33090|Viridiplantae,3GB7Y@35493|Streptophyta,44NCH@71274|asterids	0.0	Histone acetyltransferase HAC1 OS=Arabidopsis thaliana OX=3702 GN=HAC1 PE=1 SV=2	0	HAT_KAT11 & ZZ & zf-TAZ
PB.127.3	ko:K04498	GO:0000003,GO:0003006,GO:0003674,GO:0003824,GO:0004402,GO:0006325,GO:0006464,GO:0006473,GO:0006475,GO:0006807,GO:0006996,GO:0007275,GO:0008080,GO:0008150,GO:0008152,GO:0009791,GO:0009908,GO:0009987,GO:0016043,GO:0016407,GO:0016410,GO:0016569,GO:0016570,GO:0016573,GO:0016740,GO:0016746,GO:0016747,GO:0018193,GO:0018205,GO:0018393,GO:0018394,GO:0019538,GO:0022414,GO:0032501,GO:0032502,GO:0034212,GO:…	PREDICTED: Solanum tuberosum histone acetyltransferase HAC1-like (LOC102601489), transcript variant X3, mRNA	0	PREDICTED: histone acetyltransferase HAC1-like isoform X1	0	#N/A	#N/A	CREB binding protein/P300 and related TAZ Zn-finger proteins	0	COG5076@1|root,KOG1778@2759|Eukaryota,37Q3J@33090|Viridiplantae,3GB7Y@35493|Streptophyta,44NCH@71274|asterids	0.0	Histone acetyltransferase HAC1 OS=Arabidopsis thaliana OX=3702 GN=HAC1 PE=1 SV=2	0	PHD & HAT_KAT11 & ZZ & zf-TAZ
PB.128.1	-	GO:0001653,GO:0002376,GO:0003674,GO:0003824,GO:0004383,GO:0004672,GO:0004674,GO:0006139,GO:0006163,GO:0006164,GO:0006182,GO:0006464,GO:0006468,GO:0006725,GO:0006753,GO:0006793,GO:0006796,GO:0006807,GO:0006950,GO:0006952,GO:0006955,GO:0007154,GO:0007165,GO:0008150,GO:0008152,GO:0009058,GO:0009117,GO:0009150,GO:0009152,GO:0009165,GO:0009187,GO:0009190,GO:0009259,GO:0009260,GO:0009975,GO:0009987,GO:…	Solanum tuberosum cultivar Solyntus chromosome 1	0	hypothetical protein H5410_000497	0	RHS repeat-associated core domain-containing protein [Cyclobacterium marinum DSM 745]	4.42e-40	0	1.02e-153	COG0515@1|root,2QV5Y@2759|Eukaryota,37RQV@33090|Viridiplantae,3GGV8@35493|Streptophyta,44HAW@71274|asterids	0.0	Phytosulfokine receptor 1 OS=Daucus carota OX=4039 GN=PSKR PE=1 SV=1	0	LRR_8 & Pkinase & PK_Tyr_Ser-Thr
PB.129.1	ko:K05917	GO:0003674,GO:0003824,GO:0004497,GO:0005575,GO:0005622,GO:0005623,GO:0005737,GO:0005783,GO:0005794,GO:0005886,GO:0006629,GO:0006694,GO:0008150,GO:0008152,GO:0008202,GO:0008398,GO:0008610,GO:0009058,GO:0012505,GO:0016020,GO:0016125,GO:0016126,GO:0016491,GO:0016705,GO:0016709,GO:0032451,GO:0043226,GO:0043227,GO:0043229,GO:0043231,GO:0044238,GO:0044424,GO:0044444,GO:0044464,GO:0055114,GO:0070988,GO:…	Solanum chacoense obtusifoliol 14alpha-demethylase (Cyp51) mRNA, complete cds	0	hypothetical protein H5410_000493	0	Lanosterol 14-alpha demethylase [Methylomicrobium alcaliphilum 20Z]	8.9e-108	Cytochrome P450 CYP4/CYP19/CYP26 subfamilies	4.08e-21	COG2124@1|root,KOG0684@2759|Eukaryota,37KTD@33090|Viridiplantae,3G9ZV@35493|Streptophyta,44EB0@71274|asterids	0.0	Sterol 14-demethylase OS=Arabidopsis thaliana OX=3702 GN=CYP51G1 PE=1 SV=1	0	p450
PB.129.2	ko:K05917	GO:0003674,GO:0003824,GO:0004497,GO:0005575,GO:0005622,GO:0005623,GO:0005737,GO:0005783,GO:0005794,GO:0005886,GO:0006629,GO:0006694,GO:0008150,GO:0008152,GO:0008202,GO:0008398,GO:0008610,GO:0009058,GO:0012505,GO:0016020,GO:0016125,GO:0016126,GO:0016491,GO:0016705,GO:0016709,GO:0032451,GO:0043226,GO:0043227,GO:0043229,GO:0043231,GO:0044238,GO:0044424,GO:0044444,GO:0044464,GO:0055114,GO:0070988,GO:…	Solanum chacoense obtusifoliol 14alpha-demethylase (Cyp51) mRNA, complete cds	0	hypothetical protein H5410_000493	0	Lanosterol 14-alpha demethylase [Methylomicrobium alcaliphilum 20Z]	8.9e-108	Cytochrome P450 CYP4/CYP19/CYP26 subfamilies	4.08e-21	COG2124@1|root,KOG0684@2759|Eukaryota,37KTD@33090|Viridiplantae,3G9ZV@35493|Streptophyta,44EB0@71274|asterids	0.0	Sterol 14-demethylase OS=Arabidopsis thaliana OX=3702 GN=CYP51G1 PE=1 SV=1	0	p450
PB.129.3	ko:K05917	GO:0003674,GO:0003824,GO:0004497,GO:0005575,GO:0005622,GO:0005623,GO:0005737,GO:0005783,GO:0005794,GO:0005886,GO:0006629,GO:0006694,GO:0008150,GO:0008152,GO:0008202,GO:0008398,GO:0008610,GO:0009058,GO:0012505,GO:0016020,GO:0016125,GO:0016126,GO:0016491,GO:0016705,GO:0016709,GO:0032451,GO:0043226,GO:0043227,GO:0043229,GO:0043231,GO:0044238,GO:0044424,GO:0044444,GO:0044464,GO:0055114,GO:0070988,GO:…	Solanum chacoense obtusifoliol 14alpha-demethylase (Cyp51) mRNA, complete cds	0	hypothetical protein H5410_000493	0	Lanosterol 14-alpha demethylase [Methylomicrobium alcaliphilum 20Z]	8.9e-108	Cytochrome P450 CYP4/CYP19/CYP26 subfamilies	4.08e-21	COG2124@1|root,KOG0684@2759|Eukaryota,37KTD@33090|Viridiplantae,3G9ZV@35493|Streptophyta,44EB0@71274|asterids	0.0	Sterol 14-demethylase OS=Arabidopsis thaliana OX=3702 GN=CYP51G1 PE=1 SV=1	0	p450
PB.129.4	ko:K05917	GO:0003674,GO:0003824,GO:0004497,GO:0005575,GO:0005622,GO:0005623,GO:0005737,GO:0005783,GO:0005794,GO:0005886,GO:0006629,GO:0006694,GO:0008150,GO:0008152,GO:0008202,GO:0008398,GO:0008610,GO:0009058,GO:0012505,GO:0016020,GO:0016125,GO:0016126,GO:0016491,GO:0016705,GO:0016709,GO:0032451,GO:0043226,GO:0043227,GO:0043229,GO:0043231,GO:0044238,GO:0044424,GO:0044444,GO:0044464,GO:0055114,GO:0070988,GO:…	Solanum chacoense obtusifoliol 14alpha-demethylase (Cyp51) mRNA, complete cds	0	obtusifoliol 14alpha-demethylase	0	Lanosterol 14-alpha demethylase [Methylomicrobium alcaliphilum 20Z]	2.14e-106	Cytochrome P450 CYP2 subfamily	1e-18	COG2124@1|root,KOG0684@2759|Eukaryota,37KTD@33090|Viridiplantae,3G9ZV@35493|Streptophyta,44EB0@71274|asterids	0.0	Sterol 14-demethylase OS=Arabidopsis thaliana OX=3702 GN=CYP51G1 PE=1 SV=1	0	p450
PB.129.5	ko:K05917	GO:0003674,GO:0003824,GO:0004497,GO:0005575,GO:0005622,GO:0005623,GO:0005737,GO:0005783,GO:0005794,GO:0005886,GO:0006629,GO:0006694,GO:0008150,GO:0008152,GO:0008202,GO:0008398,GO:0008610,GO:0009058,GO:0012505,GO:0016020,GO:0016125,GO:0016126,GO:0016491,GO:0016705,GO:0016709,GO:0032451,GO:0043226,GO:0043227,GO:0043229,GO:0043231,GO:0044238,GO:0044424,GO:0044444,GO:0044464,GO:0055114,GO:0070988,GO:…	Solanum chacoense obtusifoliol 14alpha-demethylase (Cyp51) mRNA, complete cds	0	hypothetical protein H5410_000493	0	Lanosterol 14-alpha demethylase [Methylomicrobium alcaliphilum 20Z]	4.68e-108	Cytochrome P450 CYP4/CYP19/CYP26 subfamilies	1.08e-20	COG2124@1|root,KOG0684@2759|Eukaryota,37KTD@33090|Viridiplantae,3G9ZV@35493|Streptophyta,44EB0@71274|asterids	0.0	Sterol 14-demethylase OS=Arabidopsis thaliana OX=3702 GN=CYP51G1 PE=1 SV=1	0	p450
PB.129.6	ko:K05917	GO:0003674,GO:0003824,GO:0004497,GO:0005575,GO:0005622,GO:0005623,GO:0005737,GO:0005783,GO:0005794,GO:0005886,GO:0006629,GO:0006694,GO:0008150,GO:0008152,GO:0008202,GO:0008398,GO:0008610,GO:0009058,GO:0012505,GO:0016020,GO:0016125,GO:0016126,GO:0016491,GO:0016705,GO:0016709,GO:0032451,GO:0043226,GO:0043227,GO:0043229,GO:0043231,GO:0044238,GO:0044424,GO:0044444,GO:0044464,GO:0055114,GO:0070988,GO:…	Solanum chacoense obtusifoliol 14alpha-demethylase (Cyp51) mRNA, complete cds	0	obtusifoliol 14alpha-demethylase	0	Lanosterol 14-alpha demethylase [Methylomicrobium alcaliphilum 20Z]	1.26e-103	Cytochrome P450 CYP2 subfamily	8.33e-19	COG2124@1|root,KOG0684@2759|Eukaryota,37KTD@33090|Viridiplantae,3G9ZV@35493|Streptophyta,44EB0@71274|asterids	1.88e-315	Sterol 14-demethylase OS=Arabidopsis thaliana OX=3702 GN=CYP51G1 PE=1 SV=1	0	p450
PB.129.7	#N/A	#N/A	#N/A	#N/A	#N/A	#N/A	#N/A	#N/A	#N/A	#N/A	#N/A	#N/A	#N/A	#N/A	#N/A
PB.129.8	ko:K05917	GO:0003674,GO:0003824,GO:0004497,GO:0005575,GO:0005622,GO:0005623,GO:0005737,GO:0005783,GO:0005794,GO:0005886,GO:0006629,GO:0006694,GO:0008150,GO:0008152,GO:0008202,GO:0008398,GO:0008610,GO:0009058,GO:0012505,GO:0016020,GO:0016125,GO:0016126,GO:0016491,GO:0016705,GO:0016709,GO:0032451,GO:0043226,GO:0043227,GO:0043229,GO:0043231,GO:0044238,GO:0044424,GO:0044444,GO:0044464,GO:0055114,GO:0070988,GO:…	Solanum chacoense obtusifoliol 14alpha-demethylase (Cyp51) mRNA, complete cds	0	hypothetical protein KY290_000249	2.11e-107	Cytochrome P450 [Gordonia sp. KTR9]	1.5e-32	Cytochrome P450 CYP4/CYP19/CYP26 subfamilies	1.18e-15	COG2124@1|root,KOG0684@2759|Eukaryota,37KTD@33090|Viridiplantae,3G9ZV@35493|Streptophyta,44EB0@71274|asterids	6.68e-107	Obtusifoliol 14-alpha demethylase OS=Sorghum bicolor OX=4558 GN=CYP51 PE=1 SV=1	9.29e-103	p450
PB.130.1	-	GO:0005575,GO:0005622,GO:0005623,GO:0005737,GO:0006996,GO:0008150,GO:0009507,GO:0009526,GO:0009536,GO:0009657,GO:0009658,GO:0009941,GO:0009987,GO:0016043,GO:0031967,GO:0031975,GO:0043226,GO:0043227,GO:0043229,GO:0043231,GO:0044422,GO:0044424,GO:0044434,GO:0044435,GO:0044444,GO:0044446,GO:0044464,GO:0071840	Solanum tuberosum cultivar Solyntus chromosome 1	0	hypothetical protein KY284_000290	1.9e-142	hypothetical protein Cyan7822_0709 [Cyanothece sp. PCC 7822]	4.64e-06	0	8.92e-14	28NUQ@1|root,2QVER@2759|Eukaryota,37R6M@33090|Viridiplantae,3GAEA@35493|Streptophyta,44Q2Q@71274|asterids	4.25e-119	protein SLOW GREEN 1, chloroplastic OS=Arabidopsis thaliana OX=3702 GN=SG1 PE=1 SV=1	2.48e-46	HrpB1_HrpK & TPR_19
PB.130.2	-	GO:0005575,GO:0005622,GO:0005623,GO:0005737,GO:0006996,GO:0008150,GO:0009507,GO:0009526,GO:0009536,GO:0009657,GO:0009658,GO:0009941,GO:0009987,GO:0016043,GO:0031967,GO:0031975,GO:0043226,GO:0043227,GO:0043229,GO:0043231,GO:0044422,GO:0044424,GO:0044434,GO:0044435,GO:0044444,GO:0044446,GO:0044464,GO:0071840	Solanum tuberosum cultivar Solyntus chromosome 1	0	hypothetical protein KY289_000265	0	Tetratricopeptide TPR_2 repeat-containing protein [Oscillatoria nigro-viridis PCC 7112]	2.21e-19	0	5.5e-36	28NUQ@1|root,2QVER@2759|Eukaryota,37R6M@33090|Viridiplantae,3GAEA@35493|Streptophyta,44Q2Q@71274|asterids	5.79e-203	protein SLOW GREEN 1, chloroplastic OS=Arabidopsis thaliana OX=3702 GN=SG1 PE=1 SV=1	5.97e-114	HrpB1_HrpK
PB.130.3	-	GO:0005575,GO:0005622,GO:0005623,GO:0005737,GO:0006996,GO:0008150,GO:0009507,GO:0009526,GO:0009536,GO:0009657,GO:0009658,GO:0009941,GO:0009987,GO:0016043,GO:0031967,GO:0031975,GO:0043226,GO:0043227,GO:0043229,GO:0043231,GO:0044422,GO:0044424,GO:0044434,GO:0044435,GO:0044444,GO:0044446,GO:0044464,GO:0071840	Solanum tuberosum cultivar Solyntus chromosome 1	0	hypothetical protein H5410_000499	0	Tetratricopeptide TPR_2 repeat-containing protein [Oscillatoria nigro-viridis PCC 7112]	1.19e-19	0	3.68e-36	28NUQ@1|root,2QVER@2759|Eukaryota,37R6M@33090|Viridiplantae,3GAEA@35493|Streptophyta,44Q2Q@71274|asterids	3.04e-175	protein SLOW GREEN 1, chloroplastic OS=Arabidopsis thaliana OX=3702 GN=SG1 PE=1 SV=1	5.78e-116	HrpB1_HrpK
PB.131.1	-	-	PREDICTED: Solanum tuberosum uncharacterized LOC102603849 (LOC102603849), mRNA	0	hypothetical protein H5410_000502	0	#N/A	#N/A	0	8.91e-13	2CN5B@1|root,2QTYR@2759|Eukaryota,37TEU@33090|Viridiplantae,3GFU9@35493|Streptophyta,44NQZ@71274|asterids	6.34e-309	Remorin 4.1 OS=Oryza sativa subsp. japonica OX=39947 GN=REM4.1 PE=1 SV=1	1.61e-16	Remorin_C
PB.131.2	-	-	PREDICTED: Solanum tuberosum uncharacterized LOC102603849 (LOC102603849), mRNA	0	hypothetical protein H5410_000502	0	#N/A	#N/A	0	8.91e-13	2CN5B@1|root,2QTYR@2759|Eukaryota,37TEU@33090|Viridiplantae,3GFU9@35493|Streptophyta,44NQZ@71274|asterids	6.34e-309	Remorin 4.1 OS=Oryza sativa subsp. japonica OX=39947 GN=REM4.1 PE=1 SV=1	1.61e-16	Remorin_C
PB.131.3	-	-	PREDICTED: Solanum tuberosum uncharacterized LOC102603849 (LOC102603849), mRNA	0	hypothetical protein H5410_000502	0	#N/A	#N/A	0	3.2e-13	2CN5B@1|root,2QTYR@2759|Eukaryota,37TEU@33090|Viridiplantae,3GFU9@35493|Streptophyta,44NQZ@71274|asterids	4.07e-127	Remorin 4.1 OS=Oryza sativa subsp. japonica OX=39947 GN=REM4.1 PE=1 SV=1	4.08e-17	Remorin_C
PB.131.4	-	-	PREDICTED: Solanum tuberosum uncharacterized LOC102603849 (LOC102603849), mRNA	0	hypothetical protein H5410_000502	0	#N/A	#N/A	0	8.91e-13	2CN5B@1|root,2QTYR@2759|Eukaryota,37TEU@33090|Viridiplantae,3GFU9@35493|Streptophyta,44NQZ@71274|asterids	6.34e-309	Remorin 4.1 OS=Oryza sativa subsp. japonica OX=39947 GN=REM4.1 PE=1 SV=1	1.61e-16	Remorin_C
PB.131.5	-	-	PREDICTED: Solanum pennellii uncharacterized LOC107008058 (LOC107008058), transcript variant X2, mRNA	0	hypothetical protein H5410_000502	5.21e-95	#N/A	#N/A	0	5.84e-13	2CN5B@1|root,2QTYR@2759|Eukaryota,37TEU@33090|Viridiplantae,3GFU9@35493|Streptophyta,44NQZ@71274|asterids	5.32e-88	Remorin 4.1 OS=Oryza sativa subsp. japonica OX=39947 GN=REM4.1 PE=1 SV=1	1.71e-16	Remorin_C
PB.132.1	-	GO:0000003,GO:0000228,GO:0000785,GO:0000790,GO:0000976,GO:0000977,GO:0000978,GO:0000979,GO:0000987,GO:0001012,GO:0001046,GO:0001047,GO:0001067,GO:0001775,GO:0003674,GO:0003676,GO:0003677,GO:0003682,GO:0003690,GO:0003712,GO:0003713,GO:0005102,GO:0005488,GO:0005515,GO:0005575,GO:0005622,GO:0005623,GO:0005634,GO:0005694,GO:0005737,GO:0005856,GO:0005929,GO:0006355,GO:0006357,GO:0006996,GO:0006997,GO:…	Solanum tuberosum cultivar Solyntus chromosome 1	0	hypothetical protein H5410_000515	1.2e-172	#N/A	#N/A	0	5.75e-82	KOG3294@1|root,KOG3294@2759|Eukaryota	3.89e-153	Transcription factor TCP7 OS=Arabidopsis thaliana OX=3702 GN=TCP7 PE=1 SV=1	1.93e-81	TCP
PB.132.2	-	GO:0000003,GO:0000228,GO:0000785,GO:0000790,GO:0000976,GO:0000977,GO:0000978,GO:0000979,GO:0000987,GO:0001012,GO:0001046,GO:0001047,GO:0001067,GO:0001775,GO:0003674,GO:0003676,GO:0003677,GO:0003682,GO:0003690,GO:0003712,GO:0003713,GO:0005102,GO:0005488,GO:0005515,GO:0005575,GO:0005622,GO:0005623,GO:0005634,GO:0005694,GO:0005737,GO:0005856,GO:0005929,GO:0006355,GO:0006357,GO:0006996,GO:0006997,GO:…	Solanum tuberosum cultivar Solyntus chromosome 1	0	hypothetical protein H5410_000515	9.71e-173	#N/A	#N/A	0	5.46e-82	KOG3294@1|root,KOG3294@2759|Eukaryota	3.59e-153	Transcription factor TCP7 OS=Arabidopsis thaliana OX=3702 GN=TCP7 PE=1 SV=1	1.84e-81	TCP
PB.133.1	ko:K22415	GO:0003674,GO:0003676,GO:0003723,GO:0003729,GO:0005488,GO:0097159,GO:1901363	PREDICTED: Solanum tuberosum zinc finger CCCH domain-containing protein 17-like (LOC102603511), mRNA	0	hypothetical protein H5410_000500	0	#N/A	#N/A	#N/A	#N/A	KOG4791@1|root,KOG4791@2759|Eukaryota,37NNU@33090|Viridiplantae,3G8EA@35493|Streptophyta,44Q8B@71274|asterids	0.0	Zinc finger CCCH domain-containing protein 17 OS=Arabidopsis thaliana OX=3702 GN=At2g02160 PE=1 SV=1	1.79e-97	zf-CCCH_3 & zf_CCCH_4
PB.133.2	ko:K22415	GO:0003674,GO:0003676,GO:0003723,GO:0003729,GO:0005488,GO:0097159,GO:1901363	PREDICTED: Solanum tuberosum zinc finger CCCH domain-containing protein 17-like (LOC102603511), mRNA	0	hypothetical protein H5410_000500	0	#N/A	#N/A	#N/A	#N/A	KOG4791@1|root,KOG4791@2759|Eukaryota,37NNU@33090|Viridiplantae,3G8EA@35493|Streptophyta,44Q8B@71274|asterids	0.0	Zinc finger CCCH domain-containing protein 17 OS=Arabidopsis thaliana OX=3702 GN=At2g02160 PE=1 SV=1	1.91e-97	zf-CCCH_3 & zf_CCCH_4
PB.133.3	ko:K22415	GO:0003674,GO:0003676,GO:0003723,GO:0003729,GO:0005488,GO:0097159,GO:1901363	PREDICTED: Solanum tuberosum zinc finger CCCH domain-containing protein 17-like (LOC102603511), mRNA	0	hypothetical protein H5410_000500	0	#N/A	#N/A	#N/A	#N/A	KOG4791@1|root,KOG4791@2759|Eukaryota,37NNU@33090|Viridiplantae,3G8EA@35493|Streptophyta,44Q8B@71274|asterids	0.0	Zinc finger CCCH domain-containing protein 17 OS=Arabidopsis thaliana OX=3702 GN=At2g02160 PE=1 SV=1	1.91e-97	zf-CCCH_3 & zf_CCCH_4
PB.133.4	ko:K22415	GO:0003674,GO:0003676,GO:0003723,GO:0003729,GO:0005488,GO:0097159,GO:1901363	Solanum tuberosum cultivar Solyntus chromosome 1	0	hypothetical protein H5410_000500	0	#N/A	#N/A	#N/A	#N/A	KOG4791@1|root,KOG4791@2759|Eukaryota,37NNU@33090|Viridiplantae,3G8EA@35493|Streptophyta,44Q8B@71274|asterids	8.33e-257	Zinc finger CCCH domain-containing protein 17 OS=Arabidopsis thaliana OX=3702 GN=At2g02160 PE=1 SV=1	1.64e-18	#N/A
PB.134.1	ko:K04797	GO:0005575,GO:0005622,GO:0005623,GO:0005737,GO:0005829,GO:0006355,GO:0008150,GO:0009889,GO:0010468,GO:0010556,GO:0016272,GO:0019219,GO:0019222,GO:0031323,GO:0031326,GO:0032991,GO:0044424,GO:0044444,GO:0044464,GO:0050789,GO:0050794,GO:0051171,GO:0051252,GO:0060255,GO:0065007,GO:0080090,GO:1903506,GO:2000112,GO:2001141	PREDICTED: Solanum tuberosum probable prefoldin subunit 5 (LOC102578214), mRNA	0	PREDICTED: probable prefoldin subunit 5	3.68e-100	prefoldin alpha subunit/subunit 5 [Methanomethylovorans hollandica DSM 15978]	2.34e-06	Molecular chaperone Prefoldin, subunit 5	3.07e-78	COG1730@1|root,KOG3048@2759|Eukaryota,37TSS@33090|Viridiplantae,3GHZX@35493|Streptophyta,44JBK@71274|asterids	1.59e-94	Probable prefoldin subunit 5 OS=Arabidopsis thaliana OX=3702 GN=At5g23290 PE=2 SV=1	1.03e-77	Prefoldin
PB.135.1	ko:K17605	GO:0001101,GO:0006464,GO:0006508,GO:0006511,GO:0006807,GO:0008150,GO:0008152,GO:0009056,GO:0009057,GO:0009719,GO:0009725,GO:0009737,GO:0009892,GO:0009987,GO:0010033,GO:0010468,GO:0010605,GO:0010608,GO:0010629,GO:0016567,GO:0019222,GO:0019538,GO:0019941,GO:0030163,GO:0032446,GO:0033993,GO:0036211,GO:0042221,GO:0043170,GO:0043412,GO:0043632,GO:0044237,GO:0044238,GO:0044248,GO:0044257,GO:0044260,GO:…	PREDICTED: Solanum tuberosum serine/threonine-protein phosphatase 2A activator (LOC102578537), transcript variant X2, mRNA	0	hypothetical protein KY284_000304	0	#N/A	#N/A	Phosphotyrosyl phosphatase activator	2.74e-81	COG5057@1|root,KOG2867@2759|Eukaryota,37PYF@33090|Viridiplantae,3G91U@35493|Streptophyta,44HDC@71274|asterids	8.54e-266	Serine/threonine-protein phosphatase 2A activator OS=Bos taurus OX=9913 GN=PTPA PE=2 SV=1	3.45e-100	PTPA
PB.136.1	ko:K03671	GO:0003674,GO:0003824,GO:0004791,GO:0005575,GO:0005622,GO:0005623,GO:0005737,GO:0006950,GO:0006979,GO:0008047,GO:0008150,GO:0008152,GO:0009507,GO:0009532,GO:0009536,GO:0009570,GO:0009636,GO:0009987,GO:0015035,GO:0015036,GO:0016209,GO:0016491,GO:0016651,GO:0016667,GO:0016668,GO:0016671,GO:0019725,GO:0030234,GO:0033554,GO:0034599,GO:0042221,GO:0042592,GO:0043085,GO:0043226,GO:0043227,GO:0043229,GO:…	Solanum tuberosum cultivar Solyntus chromosome 1	0	PREDICTED: thioredoxin X, chloroplastic	1.37e-78	thioredoxin [Thermobispora bispora DSM 43833]	1.19e-11	Thioredoxin-like protein	8.84e-19	COG0526@1|root,KOG0910@2759|Eukaryota,37V9V@33090|Viridiplantae,3GIVR@35493|Streptophyta,44KCH@71274|asterids	3.28e-76	Thioredoxin X, chloroplastic OS=Arabidopsis thaliana OX=3702 GN=ATHX PE=2 SV=2	2.12e-18	Thioredoxin
PB.136.2	ko:K03671	GO:0003674,GO:0003824,GO:0004791,GO:0005575,GO:0005622,GO:0005623,GO:0005737,GO:0006950,GO:0006979,GO:0008047,GO:0008150,GO:0008152,GO:0009507,GO:0009532,GO:0009536,GO:0009570,GO:0009636,GO:0009987,GO:0015035,GO:0015036,GO:0016209,GO:0016491,GO:0016651,GO:0016667,GO:0016668,GO:0016671,GO:0019725,GO:0030234,GO:0033554,GO:0034599,GO:0042221,GO:0042592,GO:0043085,GO:0043226,GO:0043227,GO:0043229,GO:…	PREDICTED: Solanum tuberosum thioredoxin X, chloroplastic (LOC102605867), mRNA	0	PREDICTED: thioredoxin X, chloroplastic	4.17e-130	thioredoxin [Sphingomonas wittichii RW1]	1.65e-27	Thioredoxin-like protein	1.53e-61	COG0526@1|root,KOG0910@2759|Eukaryota,37V9V@33090|Viridiplantae,3GIVR@35493|Streptophyta,44KCH@71274|asterids	1.74e-125	Thioredoxin X, chloroplastic OS=Arabidopsis thaliana OX=3702 GN=ATHX PE=2 SV=2	3.51e-61	Thioredoxin & Thioredoxin_2
PB.136.3	ko:K03671	GO:0003674,GO:0003824,GO:0004791,GO:0005575,GO:0005622,GO:0005623,GO:0005737,GO:0006950,GO:0006979,GO:0008047,GO:0008150,GO:0008152,GO:0009507,GO:0009532,GO:0009536,GO:0009570,GO:0009636,GO:0009987,GO:0015035,GO:0015036,GO:0016209,GO:0016491,GO:0016651,GO:0016667,GO:0016668,GO:0016671,GO:0019725,GO:0030234,GO:0033554,GO:0034599,GO:0042221,GO:0042592,GO:0043085,GO:0043226,GO:0043227,GO:0043229,GO:…	PREDICTED: Solanum tuberosum thioredoxin X, chloroplastic (LOC102605867), mRNA	0	hypothetical protein H5410_000518	1.24e-129	thioredoxin [Sphingomonas wittichii RW1]	1.99e-27	Thioredoxin-like protein	2.25e-61	COG0526@1|root,KOG0910@2759|Eukaryota,37V9V@33090|Viridiplantae,3GIVR@35493|Streptophyta,44KCH@71274|asterids	4.99e-125	Thioredoxin X, chloroplastic OS=Arabidopsis thaliana OX=3702 GN=ATHX PE=2 SV=2	4.92e-61	Thioredoxin & Thioredoxin_2
PB.136.4	ko:K03671	GO:0003674,GO:0003824,GO:0004791,GO:0005575,GO:0005622,GO:0005623,GO:0005737,GO:0006950,GO:0006979,GO:0008047,GO:0008150,GO:0008152,GO:0009507,GO:0009532,GO:0009536,GO:0009570,GO:0009636,GO:0009987,GO:0015035,GO:0015036,GO:0016209,GO:0016491,GO:0016651,GO:0016667,GO:0016668,GO:0016671,GO:0019725,GO:0030234,GO:0033554,GO:0034599,GO:0042221,GO:0042592,GO:0043085,GO:0043226,GO:0043227,GO:0043229,GO:…	PREDICTED: Solanum tuberosum thioredoxin X, chloroplastic (LOC102605867), mRNA	0	hypothetical protein H5410_000518	3.97e-127	thioredoxin [Sphingomonas wittichii RW1]	1.51e-27	Thioredoxin-like protein	2.28e-61	COG0526@1|root,KOG0910@2759|Eukaryota,37V9V@33090|Viridiplantae,3GIVR@35493|Streptophyta,44KCH@71274|asterids	2.17e-122	Thioredoxin X, chloroplastic OS=Arabidopsis thaliana OX=3702 GN=ATHX PE=2 SV=2	4.95e-61	Thioredoxin & Thioredoxin_2
PB.136.5	ko:K03671	GO:0003674,GO:0003824,GO:0004791,GO:0005575,GO:0005622,GO:0005623,GO:0005737,GO:0006950,GO:0006979,GO:0008047,GO:0008150,GO:0008152,GO:0009507,GO:0009532,GO:0009536,GO:0009570,GO:0009636,GO:0009987,GO:0015035,GO:0015036,GO:0016209,GO:0016491,GO:0016651,GO:0016667,GO:0016668,GO:0016671,GO:0019725,GO:0030234,GO:0033554,GO:0034599,GO:0042221,GO:0042592,GO:0043085,GO:0043226,GO:0043227,GO:0043229,GO:…	PREDICTED: Solanum tuberosum thioredoxin X, chloroplastic (LOC102605867), mRNA	0	hypothetical protein H5410_000518	3.97e-127	thioredoxin [Sphingomonas wittichii RW1]	1.51e-27	Thioredoxin-like protein	2.28e-61	COG0526@1|root,KOG0910@2759|Eukaryota,37V9V@33090|Viridiplantae,3GIVR@35493|Streptophyta,44KCH@71274|asterids	2.17e-122	Thioredoxin X, chloroplastic OS=Arabidopsis thaliana OX=3702 GN=ATHX PE=2 SV=2	4.95e-61	Thioredoxin & Thioredoxin_2
PB.136.6	ko:K03671	GO:0003674,GO:0003824,GO:0004791,GO:0005575,GO:0005622,GO:0005623,GO:0005737,GO:0006950,GO:0006979,GO:0008047,GO:0008150,GO:0008152,GO:0009507,GO:0009532,GO:0009536,GO:0009570,GO:0009636,GO:0009987,GO:0015035,GO:0015036,GO:0016209,GO:0016491,GO:0016651,GO:0016667,GO:0016668,GO:0016671,GO:0019725,GO:0030234,GO:0033554,GO:0034599,GO:0042221,GO:0042592,GO:0043085,GO:0043226,GO:0043227,GO:0043229,GO:…	PREDICTED: Solanum tuberosum thioredoxin X, chloroplastic (LOC102605867), mRNA	0	PREDICTED: thioredoxin X, chloroplastic	4.17e-130	thioredoxin [Sphingomonas wittichii RW1]	1.65e-27	Thioredoxin-like protein	1.53e-61	COG0526@1|root,KOG0910@2759|Eukaryota,37V9V@33090|Viridiplantae,3GIVR@35493|Streptophyta,44KCH@71274|asterids	1.74e-125	Thioredoxin X, chloroplastic OS=Arabidopsis thaliana OX=3702 GN=ATHX PE=2 SV=2	3.51e-61	Thioredoxin & Thioredoxin_2
PB.137.1	ko:K00254	GO:0003674,GO:0003824,GO:0004152,GO:0005575,GO:0005622,GO:0005623,GO:0005737,GO:0005739,GO:0006139,GO:0006220,GO:0006221,GO:0006725,GO:0006753,GO:0006793,GO:0006796,GO:0006807,GO:0008150,GO:0008152,GO:0009058,GO:0009117,GO:0009165,GO:0009218,GO:0009220,GO:0009259,GO:0009260,GO:0009987,GO:0016491,GO:0016627,GO:0016635,GO:0018130,GO:0019438,GO:0019637,GO:0019693,GO:0034641,GO:0034654,GO:0043226,GO:…	PREDICTED: Solanum tuberosum dihydroorotate dehydrogenase (quinone), mitochondrial (LOC102578881), mRNA	0	hypothetical protein H5410_000523	0	dihydroorotate dehydrogenase 2 [Magnetospirillum magneticum AMB-1]	3.2e-128	Dihydroorotate dehydrogenase	0	COG0167@1|root,KOG1436@2759|Eukaryota,37K6A@33090|Viridiplantae,3G7TM@35493|Streptophyta,44D1H@71274|asterids	0.0	Dihydroorotate dehydrogenase (quinone), mitochondrial OS=Arabidopsis thaliana OX=3702 GN=PYRD PE=1 SV=2	0	DHO_dh
PB.137.2	ko:K00254	GO:0003674,GO:0003824,GO:0004152,GO:0005575,GO:0005622,GO:0005623,GO:0005737,GO:0005739,GO:0006139,GO:0006220,GO:0006221,GO:0006725,GO:0006753,GO:0006793,GO:0006796,GO:0006807,GO:0008150,GO:0008152,GO:0009058,GO:0009117,GO:0009165,GO:0009218,GO:0009220,GO:0009259,GO:0009260,GO:0009987,GO:0016491,GO:0016627,GO:0016635,GO:0018130,GO:0019438,GO:0019637,GO:0019693,GO:0034641,GO:0034654,GO:0043226,GO:…	PREDICTED: Solanum tuberosum dihydroorotate dehydrogenase (quinone), mitochondrial (LOC102578881), mRNA	0	hypothetical protein H5410_000523	0	dihydroorotate dehydrogenase 2 [Magnetospirillum magneticum AMB-1]	3.2e-128	Dihydroorotate dehydrogenase	0	COG0167@1|root,KOG1436@2759|Eukaryota,37K6A@33090|Viridiplantae,3G7TM@35493|Streptophyta,44D1H@71274|asterids	0.0	Dihydroorotate dehydrogenase (quinone), mitochondrial OS=Arabidopsis thaliana OX=3702 GN=PYRD PE=1 SV=2	0	DHO_dh
PB.137.3	ko:K00254	GO:0003674,GO:0003824,GO:0004152,GO:0005575,GO:0005622,GO:0005623,GO:0005737,GO:0005739,GO:0006139,GO:0006220,GO:0006221,GO:0006725,GO:0006753,GO:0006793,GO:0006796,GO:0006807,GO:0008150,GO:0008152,GO:0009058,GO:0009117,GO:0009165,GO:0009218,GO:0009220,GO:0009259,GO:0009260,GO:0009987,GO:0016491,GO:0016627,GO:0016635,GO:0018130,GO:0019438,GO:0019637,GO:0019693,GO:0034641,GO:0034654,GO:0043226,GO:…	PREDICTED: Solanum tuberosum dihydroorotate dehydrogenase (quinone), mitochondrial (LOC102578881), mRNA	0	hypothetical protein H5410_000523	0	dihydroorotate dehydrogenase 2 [Magnetospirillum magneticum AMB-1]	1.91e-129	Dihydroorotate dehydrogenase	0	COG0167@1|root,KOG1436@2759|Eukaryota,37K6A@33090|Viridiplantae,3G7TM@35493|Streptophyta,44D1H@71274|asterids	1.52e-286	Dihydroorotate dehydrogenase (quinone), mitochondrial OS=Arabidopsis thaliana OX=3702 GN=PYRD PE=1 SV=2	0	DHO_dh
PB.137.4	ko:K00254	GO:0003674,GO:0003824,GO:0004152,GO:0005575,GO:0005622,GO:0005623,GO:0005737,GO:0005739,GO:0006139,GO:0006220,GO:0006221,GO:0006725,GO:0006753,GO:0006793,GO:0006796,GO:0006807,GO:0008150,GO:0008152,GO:0009058,GO:0009117,GO:0009165,GO:0009218,GO:0009220,GO:0009259,GO:0009260,GO:0009987,GO:0016491,GO:0016627,GO:0016635,GO:0018130,GO:0019438,GO:0019637,GO:0019693,GO:0034641,GO:0034654,GO:0043226,GO:…	PREDICTED: Solanum tuberosum dihydroorotate dehydrogenase (quinone), mitochondrial (LOC102578881), mRNA	0	hypothetical protein H5410_000523	0	dihydro-orotate oxidase [Azospirillum brasilense Sp245]	2.24e-97	Dihydroorotate dehydrogenase	6.03e-164	COG0167@1|root,KOG1436@2759|Eukaryota,37K6A@33090|Viridiplantae,3G7TM@35493|Streptophyta,44D1H@71274|asterids	1.07e-205	Dihydroorotate dehydrogenase (quinone), mitochondrial OS=Arabidopsis thaliana OX=3702 GN=PYRD PE=1 SV=2	1.35e-177	DHO_dh
PB.138.1	ko:K01961	-	PREDICTED: Solanum tuberosum biotin carboxylase 1, chloroplastic (LOC102580744), mRNA	0	hypothetical protein KY289_004045	0	acetyl-CoA carboxylase, biotin carboxylase [Calothrix sp. PCC 7507]	0	3-Methylcrotonyl-CoA carboxylase, biotin-containing subunit/Propionyl-CoA carboxylase, alpha chain/Acetyl-CoA carboxylase, biotin carboxylase subunit	1.39e-111	COG4770@1|root,KOG0238@2759|Eukaryota,37S4K@33090|Viridiplantae,3G7RT@35493|Streptophyta,44H5H@71274|asterids	0.0	Biotin carboxylase 1, chloroplastic OS=Populus trichocarpa OX=3694 GN=POPTRDRAFT_831870 PE=2 SV=1	0	Biotin_carb_N & CPSase_L_D2 & ATP-grasp & Dala_Dala_lig_C & Biotin_carb_C
PB.138.2	ko:K01961	-	PREDICTED: Solanum tuberosum biotin carboxylase 1, chloroplastic (LOC102580744), mRNA	0	hypothetical protein H5410_000532	0	acetyl-CoA carboxylase, biotin carboxylase [Calothrix sp. PCC 7507]	0	3-Methylcrotonyl-CoA carboxylase, biotin-containing subunit/Propionyl-CoA carboxylase, alpha chain/Acetyl-CoA carboxylase, biotin carboxylase subunit	3.15e-111	COG4770@1|root,KOG0238@2759|Eukaryota,37S4K@33090|Viridiplantae,3G7RT@35493|Streptophyta,44H5H@71274|asterids	0.0	Biotin carboxylase 1, chloroplastic OS=Populus trichocarpa OX=3694 GN=POPTRDRAFT_831870 PE=2 SV=1	0	Biotin_carb_N & CPSase_L_D2 & ATP-grasp & Dala_Dala_lig_C & Biotin_carb_C
PB.138.3	ko:K01961	-	PREDICTED: Solanum tuberosum biotin carboxylase 1, chloroplastic (LOC102580744), mRNA	0	hypothetical protein KY289_004045	0	acetyl-CoA carboxylase, biotin carboxylase [Calothrix sp. PCC 7507]	0	3-Methylcrotonyl-CoA carboxylase, biotin-containing subunit/Propionyl-CoA carboxylase, alpha chain/Acetyl-CoA carboxylase, biotin carboxylase subunit	1.39e-111	COG4770@1|root,KOG0238@2759|Eukaryota,37S4K@33090|Viridiplantae,3G7RT@35493|Streptophyta,44H5H@71274|asterids	0.0	Biotin carboxylase 1, chloroplastic OS=Populus trichocarpa OX=3694 GN=POPTRDRAFT_831870 PE=2 SV=1	0	Biotin_carb_N & CPSase_L_D2 & ATP-grasp & Dala_Dala_lig_C & Biotin_carb_C
PB.138.4	ko:K01961	-	PREDICTED: Solanum tuberosum biotin carboxylase 1, chloroplastic (LOC102580744), mRNA	0	hypothetical protein KY289_004045	0	acetyl-CoA carboxylase, biotin carboxylase [Calothrix sp. PCC 7507]	0	3-Methylcrotonyl-CoA carboxylase, biotin-containing subunit/Propionyl-CoA carboxylase, alpha chain/Acetyl-CoA carboxylase, biotin carboxylase subunit	8.18e-112	COG4770@1|root,KOG0238@2759|Eukaryota,37S4K@33090|Viridiplantae,3G7RT@35493|Streptophyta,44H5H@71274|asterids	0.0	Biotin carboxylase 1, chloroplastic OS=Populus trichocarpa OX=3694 GN=POPTRDRAFT_831870 PE=2 SV=1	0	Biotin_carb_N & CPSase_L_D2 & ATP-grasp & Dala_Dala_lig_C & Biotin_carb_C
PB.138.5	ko:K01961	-	PREDICTED: Solanum tuberosum biotin carboxylase 1, chloroplastic (LOC102580744), mRNA	0	hypothetical protein KY289_004045	0	acetyl-CoA carboxylase, biotin carboxylase [Calothrix sp. PCC 7507]	5.24e-171	3-Methylcrotonyl-CoA carboxylase, biotin-containing subunit/Propionyl-CoA carboxylase, alpha chain/Acetyl-CoA carboxylase, biotin carboxylase subunit	8.45e-79	COG4770@1|root,KOG0238@2759|Eukaryota,37S4K@33090|Viridiplantae,3G7RT@35493|Streptophyta,44H5H@71274|asterids	2.26e-252	Biotin carboxylase 1, chloroplastic OS=Populus trichocarpa OX=3694 GN=POPTRDRAFT_831870 PE=2 SV=1	0	CPSase_L_D2 & ATP-grasp & Dala_Dala_lig_C & Biotin_carb_C
PB.138.6	ko:K01961	-	PREDICTED: Solanum tuberosum biotin carboxylase 1, chloroplastic (LOC102580744), mRNA	0	hypothetical protein H5410_000532	0	acetyl-CoA carboxylase, biotin carboxylase [Calothrix sp. PCC 7507]	1.59e-165	3-Methylcrotonyl-CoA carboxylase, biotin-containing subunit/Propionyl-CoA carboxylase, alpha chain/Acetyl-CoA carboxylase, biotin carboxylase subunit	2.86e-76	COG4770@1|root,KOG0238@2759|Eukaryota,37S4K@33090|Viridiplantae,3G7RT@35493|Streptophyta,44H5H@71274|asterids	1.29e-244	Biotin carboxylase 1, chloroplastic OS=Populus trichocarpa OX=3694 GN=POPTRDRAFT_831870 PE=2 SV=1	0	CPSase_L_D2 & ATP-grasp & Dala_Dala_lig_C & Biotin_carb_C
PB.138.7	ko:K01961	-	PREDICTED: Solanum tuberosum biotin carboxylase 1, chloroplastic (LOC102580744), mRNA	0	PREDICTED: biotin carboxylase 1, chloroplastic	0	acetyl-CoA carboxylase, biotin carboxylase subunit [Microcoleus sp. PCC 7113]	3.51e-113	3-Methylcrotonyl-CoA carboxylase, biotin-containing subunit/Propionyl-CoA carboxylase, alpha chain/Acetyl-CoA carboxylase, biotin carboxylase subunit	1.54e-51	COG4770@1|root,KOG0238@2759|Eukaryota,37S4K@33090|Viridiplantae,3G7RT@35493|Streptophyta,44H5H@71274|asterids	3.64e-176	Biotin carboxylase 1, chloroplastic OS=Populus trichocarpa OX=3694 GN=POPTRDRAFT_831870 PE=2 SV=1	2.14e-170	CPSase_L_D2 & Biotin_carb_C
PB.139.1	ko:K02884	-	PREDICTED: Solanum tuberosum 50S ribosomal protein L19-1, chloroplastic-like (LOC102581085), mRNA	9.37e-116	L19 ribosomal protein-like	3.93e-47	50S ribosomal protein L19 [Azospirillum brasilense Sp245]	1.79e-19	Mitochondrial/chloroplast ribosomal protein L19	5.72e-44	COG0335@1|root,KOG1698@2759|Eukaryota,37UAF@33090|Viridiplantae,3GI5N@35493|Streptophyta,44JKK@71274|asterids	1.67e-46	50S ribosomal protein L19, chloroplastic OS=Spinacia oleracea OX=3562 GN=RPL19 PE=1 SV=2	2.78e-31	Ribosomal_L19
PB.139.2	ko:K02884	-	PREDICTED: Solanum tuberosum 50S ribosomal protein L19-1, chloroplastic-like (LOC102581085), mRNA	0	PREDICTED: 50S ribosomal protein L19-1, chloroplastic-like	1.45e-179	50S ribosomal protein L19 [Azospirillum brasilense Sp245]	1.23e-23	Mitochondrial/chloroplast ribosomal protein L19	5.6e-73	COG0335@1|root,KOG1698@2759|Eukaryota,37UAF@33090|Viridiplantae,3GI5N@35493|Streptophyta,44JKK@71274|asterids	2e-157	50S ribosomal protein L19, chloroplastic OS=Spinacia oleracea OX=3562 GN=RPL19 PE=1 SV=2	5.15e-38	Ribosomal_L19
PB.139.3	ko:K02884	-	PREDICTED: Solanum tuberosum 50S ribosomal protein L19-1, chloroplastic-like (LOC102581085), mRNA	0	PREDICTED: 50S ribosomal protein L19-1, chloroplastic-like	1.27e-92	50S ribosomal protein L19 [Azospirillum brasilense Sp245]	5.69e-25	Mitochondrial/chloroplast ribosomal protein L19	2.69e-74	COG0335@1|root,KOG1698@2759|Eukaryota,37UAF@33090|Viridiplantae,3GI5N@35493|Streptophyta,44JKK@71274|asterids	4.58e-87	50S ribosomal protein L19, chloroplastic OS=Spinacia oleracea OX=3562 GN=RPL19 PE=1 SV=2	3.49e-39	Ribosomal_L19
PB.139.4	ko:K02884	-	PREDICTED: Solanum tuberosum 50S ribosomal protein L19-1, chloroplastic-like (LOC102581085), mRNA	0	PREDICTED: 50S ribosomal protein L19-1, chloroplastic-like	0	50S ribosomal protein L19 [Azospirillum brasilense Sp245]	1.07e-23	Mitochondrial/chloroplast ribosomal protein L19	2.47e-74	COG0335@1|root,KOG1698@2759|Eukaryota,37UAF@33090|Viridiplantae,3GI5N@35493|Streptophyta,44JKK@71274|asterids	5.09e-157	50S ribosomal protein L19, chloroplastic OS=Spinacia oleracea OX=3562 GN=RPL19 PE=1 SV=2	4.57e-38	Ribosomal_L19
PB.140.1	ko:K01890	GO:0005575,GO:0005622,GO:0005623,GO:0005737,GO:0005829,GO:0006082,GO:0006139,GO:0006399,GO:0006412,GO:0006418,GO:0006432,GO:0006518,GO:0006520,GO:0006725,GO:0006807,GO:0008150,GO:0008152,GO:0009058,GO:0009059,GO:0009328,GO:0009987,GO:0010467,GO:0016070,GO:0019538,GO:0019752,GO:0032991,GO:0034641,GO:0034645,GO:0034660,GO:0043038,GO:0043039,GO:0043043,GO:0043170,GO:0043436,GO:0043603,GO:0043604,GO:…	PREDICTED: Solanum tuberosum phenylalanine--tRNA ligase beta subunit, cytoplasmic (LOC102579212), mRNA	0	hypothetical protein H5410_000525	0	phenylalanyl-tRNA synthetase subunit beta [Methanococcoides burtonii DSM 6242]	1.99e-87	Phenylalanyl-tRNA synthetase beta subunit	1.95e-177	COG0072@1|root,KOG2472@2759|Eukaryota,37QBY@33090|Viridiplantae,3G9AC@35493|Streptophyta,44BKU@71274|asterids	0.0	Phenylalanine--tRNA ligase beta subunit, cytoplasmic OS=Arabidopsis thaliana OX=3702 GN=At1g72550 PE=2 SV=1	0	PhetRS_B1 & B3_4 & B5 & tRNA_synthFbeta
PB.140.2	ko:K01890	GO:0005575,GO:0005622,GO:0005623,GO:0005737,GO:0005829,GO:0006082,GO:0006139,GO:0006399,GO:0006412,GO:0006418,GO:0006432,GO:0006518,GO:0006520,GO:0006725,GO:0006807,GO:0008150,GO:0008152,GO:0009058,GO:0009059,GO:0009328,GO:0009987,GO:0010467,GO:0016070,GO:0019538,GO:0019752,GO:0032991,GO:0034641,GO:0034645,GO:0034660,GO:0043038,GO:0043039,GO:0043043,GO:0043170,GO:0043436,GO:0043603,GO:0043604,GO:…	PREDICTED: Solanum tuberosum phenylalanine--tRNA ligase beta subunit, cytoplasmic (LOC102579212), mRNA	0	hypothetical protein H5410_000525	0	phenylalanyl-tRNA synthetase subunit beta [Methanococcoides burtonii DSM 6242]	1.99e-87	Phenylalanyl-tRNA synthetase beta subunit	1.95e-177	COG0072@1|root,KOG2472@2759|Eukaryota,37QBY@33090|Viridiplantae,3G9AC@35493|Streptophyta,44BKU@71274|asterids	0.0	Phenylalanine--tRNA ligase beta subunit, cytoplasmic OS=Arabidopsis thaliana OX=3702 GN=At1g72550 PE=2 SV=1	0	PhetRS_B1 & B3_4 & B5 & tRNA_synthFbeta
PB.140.3	ko:K01890	GO:0005575,GO:0005622,GO:0005623,GO:0005737,GO:0005829,GO:0006082,GO:0006139,GO:0006399,GO:0006412,GO:0006418,GO:0006432,GO:0006518,GO:0006520,GO:0006725,GO:0006807,GO:0008150,GO:0008152,GO:0009058,GO:0009059,GO:0009328,GO:0009987,GO:0010467,GO:0016070,GO:0019538,GO:0019752,GO:0032991,GO:0034641,GO:0034645,GO:0034660,GO:0043038,GO:0043039,GO:0043043,GO:0043170,GO:0043436,GO:0043603,GO:0043604,GO:…	PREDICTED: Solanum tuberosum phenylalanine--tRNA ligase beta subunit, cytoplasmic (LOC102579212), mRNA	0	hypothetical protein H5410_000525	0	phenylalanyl-tRNA synthetase subunit beta [Methanococcoides burtonii DSM 6242]	2.09e-87	Phenylalanyl-tRNA synthetase beta subunit	1.81e-177	COG0072@1|root,KOG2472@2759|Eukaryota,37QBY@33090|Viridiplantae,3G9AC@35493|Streptophyta,44BKU@71274|asterids	0.0	Phenylalanine--tRNA ligase beta subunit, cytoplasmic OS=Arabidopsis thaliana OX=3702 GN=At1g72550 PE=2 SV=1	0	PhetRS_B1 & B3_4 & B5 & tRNA_synthFbeta
PB.140.4	ko:K01890	GO:0005575,GO:0005622,GO:0005623,GO:0005737,GO:0005829,GO:0006082,GO:0006139,GO:0006399,GO:0006412,GO:0006418,GO:0006432,GO:0006518,GO:0006520,GO:0006725,GO:0006807,GO:0008150,GO:0008152,GO:0009058,GO:0009059,GO:0009328,GO:0009987,GO:0010467,GO:0016070,GO:0019538,GO:0019752,GO:0032991,GO:0034641,GO:0034645,GO:0034660,GO:0043038,GO:0043039,GO:0043043,GO:0043170,GO:0043436,GO:0043603,GO:0043604,GO:…	PREDICTED: Solanum tuberosum phenylalanine--tRNA ligase beta subunit, cytoplasmic (LOC102579212), mRNA	0	hypothetical protein H5410_000525	0	phenylalanyl-tRNA synthetase subunit beta [Methanococcoides burtonii DSM 6242]	1.99e-87	Phenylalanyl-tRNA synthetase beta subunit	1.95e-177	COG0072@1|root,KOG2472@2759|Eukaryota,37QBY@33090|Viridiplantae,3G9AC@35493|Streptophyta,44BKU@71274|asterids	0.0	Phenylalanine--tRNA ligase beta subunit, cytoplasmic OS=Arabidopsis thaliana OX=3702 GN=At1g72550 PE=2 SV=1	0	PhetRS_B1 & B3_4 & B5 & tRNA_synthFbeta
PB.140.5	ko:K01890	GO:0005575,GO:0005622,GO:0005623,GO:0005737,GO:0005829,GO:0006082,GO:0006139,GO:0006399,GO:0006412,GO:0006418,GO:0006432,GO:0006518,GO:0006520,GO:0006725,GO:0006807,GO:0008150,GO:0008152,GO:0009058,GO:0009059,GO:0009328,GO:0009987,GO:0010467,GO:0016070,GO:0019538,GO:0019752,GO:0032991,GO:0034641,GO:0034645,GO:0034660,GO:0043038,GO:0043039,GO:0043043,GO:0043170,GO:0043436,GO:0043603,GO:0043604,GO:…	PREDICTED: Solanum tuberosum phenylalanine--tRNA ligase beta subunit, cytoplasmic (LOC102579212), mRNA	0	hypothetical protein KY290_003698	0	phenylalanyl-tRNA synthetase subunit beta [Methanococcoides burtonii DSM 6242]	5.09e-84	Phenylalanyl-tRNA synthetase beta subunit	1.73e-148	COG0072@1|root,KOG2472@2759|Eukaryota,37QBY@33090|Viridiplantae,3G9AC@35493|Streptophyta,44BKU@71274|asterids	0.0	Phenylalanine--tRNA ligase beta subunit, cytoplasmic OS=Arabidopsis thaliana OX=3702 GN=At1g72550 PE=2 SV=1	0	B3_4 & B5 & tRNA_synthFbeta
PB.140.6	ko:K01890	GO:0005575,GO:0005622,GO:0005623,GO:0005737,GO:0005829,GO:0006082,GO:0006139,GO:0006399,GO:0006412,GO:0006418,GO:0006432,GO:0006518,GO:0006520,GO:0006725,GO:0006807,GO:0008150,GO:0008152,GO:0009058,GO:0009059,GO:0009328,GO:0009987,GO:0010467,GO:0016070,GO:0019538,GO:0019752,GO:0032991,GO:0034641,GO:0034645,GO:0034660,GO:0043038,GO:0043039,GO:0043043,GO:0043170,GO:0043436,GO:0043603,GO:0043604,GO:…	PREDICTED: Solanum tuberosum phenylalanine--tRNA ligase beta subunit, cytoplasmic (LOC102579212), mRNA	0	hypothetical protein H5410_000525	0	phenylalanyl-tRNA synthetase subunit beta [Methanococcoides burtonii DSM 6242]	1.99e-87	Phenylalanyl-tRNA synthetase beta subunit	1.95e-177	COG0072@1|root,KOG2472@2759|Eukaryota,37QBY@33090|Viridiplantae,3G9AC@35493|Streptophyta,44BKU@71274|asterids	0.0	Phenylalanine--tRNA ligase beta subunit, cytoplasmic OS=Arabidopsis thaliana OX=3702 GN=At1g72550 PE=2 SV=1	0	PhetRS_B1 & B3_4 & B5 & tRNA_synthFbeta
PB.141.1	#N/A	#N/A	#N/A	#N/A	#N/A	#N/A	#N/A	#N/A	#N/A	#N/A	#N/A	#N/A	#N/A	#N/A	#N/A
PB.142.1	ko:K03038	GO:0000003,GO:0000502,GO:0003006,GO:0005575,GO:0005622,GO:0005623,GO:0005634,GO:0006508,GO:0006511,GO:0006807,GO:0007275,GO:0008150,GO:0008152,GO:0009056,GO:0009057,GO:0009790,GO:0009791,GO:0009793,GO:0009987,GO:0010154,GO:0010498,GO:0019538,GO:0019941,GO:0022414,GO:0030163,GO:0032501,GO:0032502,GO:0032991,GO:0043161,GO:0043170,GO:0043226,GO:0043227,GO:0043229,GO:0043231,GO:0043632,GO:0044237,GO:…	PREDICTED: Solanum pennellii 26S proteasome non-ATPase regulatory subunit 7 homolog A (LOC107008203), transcript variant X2, misc_RNA	0	hypothetical protein KY284_003874	0	#N/A	#N/A	26S proteasome regulatory complex, subunit RPN8/PSMD7	0	COG1310@1|root,KOG1556@2759|Eukaryota,37J0U@33090|Viridiplantae,3G77D@35493|Streptophyta,44DKV@71274|asterids	1.02e-211	26S proteasome non-ATPase regulatory subunit 7 homolog A OS=Arabidopsis thaliana OX=3702 GN=RPN8A PE=1 SV=1	0	JAB & MitMem_reg
PB.142.2	ko:K03038	GO:0000003,GO:0000502,GO:0003006,GO:0005575,GO:0005622,GO:0005623,GO:0005634,GO:0006508,GO:0006511,GO:0006807,GO:0007275,GO:0008150,GO:0008152,GO:0009056,GO:0009057,GO:0009790,GO:0009791,GO:0009793,GO:0009987,GO:0010154,GO:0010498,GO:0019538,GO:0019941,GO:0022414,GO:0030163,GO:0032501,GO:0032502,GO:0032991,GO:0043161,GO:0043170,GO:0043226,GO:0043227,GO:0043229,GO:0043231,GO:0043632,GO:0044237,GO:…	PREDICTED: Solanum pennellii 26S proteasome non-ATPase regulatory subunit 7 homolog A (LOC107008203), transcript variant X2, misc_RNA	0	hypothetical protein KY284_003874	0	#N/A	#N/A	26S proteasome regulatory complex, subunit RPN8/PSMD7	0	COG1310@1|root,KOG1556@2759|Eukaryota,37J0U@33090|Viridiplantae,3G77D@35493|Streptophyta,44DKV@71274|asterids	1.02e-211	26S proteasome non-ATPase regulatory subunit 7 homolog A OS=Arabidopsis thaliana OX=3702 GN=RPN8A PE=1 SV=1	0	JAB & MitMem_reg
PB.142.3	ko:K03038	GO:0000003,GO:0000502,GO:0003006,GO:0005575,GO:0005622,GO:0005623,GO:0005634,GO:0006508,GO:0006511,GO:0006807,GO:0007275,GO:0008150,GO:0008152,GO:0009056,GO:0009057,GO:0009790,GO:0009791,GO:0009793,GO:0009987,GO:0010154,GO:0010498,GO:0019538,GO:0019941,GO:0022414,GO:0030163,GO:0032501,GO:0032502,GO:0032991,GO:0043161,GO:0043170,GO:0043226,GO:0043227,GO:0043229,GO:0043231,GO:0043632,GO:0044237,GO:…	PREDICTED: Solanum pennellii 26S proteasome non-ATPase regulatory subunit 7 homolog A (LOC107008203), transcript variant X2, misc_RNA	1.38e-179	hypothetical protein H5410_000587	7.78e-84	#N/A	#N/A	26S proteasome regulatory complex, subunit RPN8/PSMD7	1.15e-74	COG1310@1|root,KOG1556@2759|Eukaryota,37J0U@33090|Viridiplantae,3G77D@35493|Streptophyta,44DKV@71274|asterids	1.27e-80	26S proteasome non-ATPase regulatory subunit 7 homolog B OS=Arabidopsis thaliana OX=3702 GN=RPN8B PE=1 SV=1	3.54e-74	JAB
PB.142.4	ko:K03038	GO:0000003,GO:0000502,GO:0003006,GO:0005575,GO:0005622,GO:0005623,GO:0005634,GO:0006508,GO:0006511,GO:0006807,GO:0007275,GO:0008150,GO:0008152,GO:0009056,GO:0009057,GO:0009790,GO:0009791,GO:0009793,GO:0009987,GO:0010154,GO:0010498,GO:0019538,GO:0019941,GO:0022414,GO:0030163,GO:0032501,GO:0032502,GO:0032991,GO:0043161,GO:0043170,GO:0043226,GO:0043227,GO:0043229,GO:0043231,GO:0043632,GO:0044237,GO:…	Solanum lycopersicum putative 26S proteasome subunit (LOC101267337), mRNA	0	hypothetical protein KY284_003874	3.19e-176	#N/A	#N/A	26S proteasome regulatory complex, subunit RPN8/PSMD7	3.16e-162	COG1310@1|root,KOG1556@2759|Eukaryota,37J0U@33090|Viridiplantae,3G77D@35493|Streptophyta,44DKV@71274|asterids	4.9e-170	26S proteasome non-ATPase regulatory subunit 7 homolog A OS=Arabidopsis thaliana OX=3702 GN=RPN8A PE=1 SV=1	1.06e-161	JAB & MitMem_reg
PB.142.5	ko:K03038	GO:0000003,GO:0000502,GO:0003006,GO:0005575,GO:0005622,GO:0005623,GO:0005634,GO:0006508,GO:0006511,GO:0006807,GO:0007275,GO:0008150,GO:0008152,GO:0009056,GO:0009057,GO:0009790,GO:0009791,GO:0009793,GO:0009987,GO:0010154,GO:0010498,GO:0019538,GO:0019941,GO:0022414,GO:0030163,GO:0032501,GO:0032502,GO:0032991,GO:0043161,GO:0043170,GO:0043226,GO:0043227,GO:0043229,GO:0043231,GO:0043632,GO:0044237,GO:…	PREDICTED: Solanum pennellii 26S proteasome non-ATPase regulatory subunit 7 homolog A (LOC107008203), transcript variant X2, misc_RNA	1.38e-179	hypothetical protein H5410_000587	7.78e-84	#N/A	#N/A	26S proteasome regulatory complex, subunit RPN8/PSMD7	1.15e-74	COG1310@1|root,KOG1556@2759|Eukaryota,37J0U@33090|Viridiplantae,3G77D@35493|Streptophyta,44DKV@71274|asterids	1.27e-80	26S proteasome non-ATPase regulatory subunit 7 homolog B OS=Arabidopsis thaliana OX=3702 GN=RPN8B PE=1 SV=1	3.54e-74	JAB
PB.142.6	ko:K03038	GO:0000003,GO:0000502,GO:0003006,GO:0005575,GO:0005622,GO:0005623,GO:0005634,GO:0006508,GO:0006511,GO:0006807,GO:0007275,GO:0008150,GO:0008152,GO:0009056,GO:0009057,GO:0009790,GO:0009791,GO:0009793,GO:0009987,GO:0010154,GO:0010498,GO:0019538,GO:0019941,GO:0022414,GO:0030163,GO:0032501,GO:0032502,GO:0032991,GO:0043161,GO:0043170,GO:0043226,GO:0043227,GO:0043229,GO:0043231,GO:0043632,GO:0044237,GO:…	PREDICTED: Solanum pennellii 26S proteasome non-ATPase regulatory subunit 7 homolog A (LOC107008203), transcript variant X2, misc_RNA	1.38e-179	hypothetical protein H5410_000587	7.78e-84	#N/A	#N/A	26S proteasome regulatory complex, subunit RPN8/PSMD7	1.15e-74	COG1310@1|root,KOG1556@2759|Eukaryota,37J0U@33090|Viridiplantae,3G77D@35493|Streptophyta,44DKV@71274|asterids	1.27e-80	26S proteasome non-ATPase regulatory subunit 7 homolog B OS=Arabidopsis thaliana OX=3702 GN=RPN8B PE=1 SV=1	3.54e-74	JAB
PB.142.7	ko:K03038	GO:0000003,GO:0000502,GO:0003006,GO:0005575,GO:0005622,GO:0005623,GO:0005634,GO:0006508,GO:0006511,GO:0006807,GO:0007275,GO:0008150,GO:0008152,GO:0009056,GO:0009057,GO:0009790,GO:0009791,GO:0009793,GO:0009987,GO:0010154,GO:0010498,GO:0019538,GO:0019941,GO:0022414,GO:0030163,GO:0032501,GO:0032502,GO:0032991,GO:0043161,GO:0043170,GO:0043226,GO:0043227,GO:0043229,GO:0043231,GO:0043632,GO:0044237,GO:…	PREDICTED: Solanum pennellii 26S proteasome non-ATPase regulatory subunit 7 homolog A (LOC107008203), transcript variant X2, misc_RNA	1.38e-179	hypothetical protein H5410_000587	7.78e-84	#N/A	#N/A	26S proteasome regulatory complex, subunit RPN8/PSMD7	1.15e-74	COG1310@1|root,KOG1556@2759|Eukaryota,37J0U@33090|Viridiplantae,3G77D@35493|Streptophyta,44DKV@71274|asterids	1.27e-80	26S proteasome non-ATPase regulatory subunit 7 homolog B OS=Arabidopsis thaliana OX=3702 GN=RPN8B PE=1 SV=1	3.54e-74	JAB
PB.142.8	ko:K03038	GO:0000003,GO:0000502,GO:0003006,GO:0005575,GO:0005622,GO:0005623,GO:0005634,GO:0006508,GO:0006511,GO:0006807,GO:0007275,GO:0008150,GO:0008152,GO:0009056,GO:0009057,GO:0009790,GO:0009791,GO:0009793,GO:0009987,GO:0010154,GO:0010498,GO:0019538,GO:0019941,GO:0022414,GO:0030163,GO:0032501,GO:0032502,GO:0032991,GO:0043161,GO:0043170,GO:0043226,GO:0043227,GO:0043229,GO:0043231,GO:0043632,GO:0044237,GO:…	Solanum lycopersicum putative 26S proteasome subunit (LOC101267337), mRNA	0	hypothetical protein KY284_003874	0	#N/A	#N/A	26S proteasome regulatory complex, subunit RPN8/PSMD7	9.67e-169	COG1310@1|root,KOG1556@2759|Eukaryota,37J0U@33090|Viridiplantae,3G77D@35493|Streptophyta,44DKV@71274|asterids	2.71e-176	26S proteasome non-ATPase regulatory subunit 7 homolog A OS=Arabidopsis thaliana OX=3702 GN=RPN8A PE=1 SV=1	3.25e-168	JAB & MitMem_reg
PB.142.9	ko:K03038	GO:0000003,GO:0000502,GO:0003006,GO:0005575,GO:0005622,GO:0005623,GO:0005634,GO:0006508,GO:0006511,GO:0006807,GO:0007275,GO:0008150,GO:0008152,GO:0009056,GO:0009057,GO:0009790,GO:0009791,GO:0009793,GO:0009987,GO:0010154,GO:0010498,GO:0019538,GO:0019941,GO:0022414,GO:0030163,GO:0032501,GO:0032502,GO:0032991,GO:0043161,GO:0043170,GO:0043226,GO:0043227,GO:0043229,GO:0043231,GO:0043632,GO:0044237,GO:…	Solanum lycopersicum putative 26S proteasome subunit (LOC101267337), mRNA	0	putative 26S proteasome subunit	1.55e-143	#N/A	#N/A	26S proteasome regulatory complex, subunit RPN8/PSMD7	3.89e-131	COG1310@1|root,KOG1556@2759|Eukaryota,37J0U@33090|Viridiplantae,3G77D@35493|Streptophyta,44DKV@71274|asterids	1.98e-137	26S proteasome non-ATPase regulatory subunit 7 homolog A OS=Arabidopsis thaliana OX=3702 GN=RPN8A PE=1 SV=1	1.31e-130	MitMem_reg
PB.142.10	ko:K03038	GO:0000003,GO:0000502,GO:0003006,GO:0005575,GO:0005622,GO:0005623,GO:0005634,GO:0006508,GO:0006511,GO:0006807,GO:0007275,GO:0008150,GO:0008152,GO:0009056,GO:0009057,GO:0009790,GO:0009791,GO:0009793,GO:0009987,GO:0010154,GO:0010498,GO:0019538,GO:0019941,GO:0022414,GO:0030163,GO:0032501,GO:0032502,GO:0032991,GO:0043161,GO:0043170,GO:0043226,GO:0043227,GO:0043229,GO:0043231,GO:0043632,GO:0044237,GO:…	PREDICTED: Solanum pennellii 26S proteasome non-ATPase regulatory subunit 7 homolog A (LOC107008203), transcript variant X2, misc_RNA	1.38e-179	hypothetical protein H5410_000587	7.78e-84	#N/A	#N/A	26S proteasome regulatory complex, subunit RPN8/PSMD7	1.15e-74	COG1310@1|root,KOG1556@2759|Eukaryota,37J0U@33090|Viridiplantae,3G77D@35493|Streptophyta,44DKV@71274|asterids	1.27e-80	26S proteasome non-ATPase regulatory subunit 7 homolog B OS=Arabidopsis thaliana OX=3702 GN=RPN8B PE=1 SV=1	3.54e-74	JAB
PB.142.11	ko:K03038	GO:0000003,GO:0000502,GO:0003006,GO:0005575,GO:0005622,GO:0005623,GO:0005634,GO:0006508,GO:0006511,GO:0006807,GO:0007275,GO:0008150,GO:0008152,GO:0009056,GO:0009057,GO:0009790,GO:0009791,GO:0009793,GO:0009987,GO:0010154,GO:0010498,GO:0019538,GO:0019941,GO:0022414,GO:0030163,GO:0032501,GO:0032502,GO:0032991,GO:0043161,GO:0043170,GO:0043226,GO:0043227,GO:0043229,GO:0043231,GO:0043632,GO:0044237,GO:…	PREDICTED: Solanum pennellii 26S proteasome non-ATPase regulatory subunit 7 homolog A (LOC107008203), transcript variant X2, misc_RNA	0	hypothetical protein H5410_000537	5.79e-174	#N/A	#N/A	26S proteasome regulatory complex, subunit RPN8/PSMD7	1.13e-158	COG1310@1|root,KOG1556@2759|Eukaryota,37J0U@33090|Viridiplantae,3G77D@35493|Streptophyta,44DKV@71274|asterids	1.14e-167	26S proteasome non-ATPase regulatory subunit 7 homolog B OS=Arabidopsis thaliana OX=3702 GN=RPN8B PE=1 SV=1	6.17e-159	JAB & MitMem_reg
PB.142.12	ko:K03038	GO:0000003,GO:0000502,GO:0003006,GO:0005575,GO:0005622,GO:0005623,GO:0005634,GO:0006508,GO:0006511,GO:0006807,GO:0007275,GO:0008150,GO:0008152,GO:0009056,GO:0009057,GO:0009790,GO:0009791,GO:0009793,GO:0009987,GO:0010154,GO:0010498,GO:0019538,GO:0019941,GO:0022414,GO:0030163,GO:0032501,GO:0032502,GO:0032991,GO:0043161,GO:0043170,GO:0043226,GO:0043227,GO:0043229,GO:0043231,GO:0043632,GO:0044237,GO:…	PREDICTED: Solanum pennellii 26S proteasome non-ATPase regulatory subunit 7 homolog A (LOC107008203), transcript variant X2, misc_RNA	0	hypothetical protein H5410_000537	0	#N/A	#N/A	26S proteasome regulatory complex, subunit RPN8/PSMD7	2.26e-171	COG1310@1|root,KOG1556@2759|Eukaryota,37J0U@33090|Viridiplantae,3G77D@35493|Streptophyta,44DKV@71274|asterids	5.26e-181	26S proteasome non-ATPase regulatory subunit 7 homolog B OS=Arabidopsis thaliana OX=3702 GN=RPN8B PE=1 SV=1	2.26e-171	JAB & MitMem_reg
PB.142.13	ko:K03038	GO:0000003,GO:0000502,GO:0003006,GO:0005575,GO:0005622,GO:0005623,GO:0005634,GO:0006508,GO:0006511,GO:0006807,GO:0007275,GO:0008150,GO:0008152,GO:0009056,GO:0009057,GO:0009790,GO:0009791,GO:0009793,GO:0009987,GO:0010154,GO:0010498,GO:0019538,GO:0019941,GO:0022414,GO:0030163,GO:0032501,GO:0032502,GO:0032991,GO:0043161,GO:0043170,GO:0043226,GO:0043227,GO:0043229,GO:0043231,GO:0043632,GO:0044237,GO:…	PREDICTED: Solanum pennellii 26S proteasome non-ATPase regulatory subunit 7 homolog A (LOC107008203), transcript variant X2, misc_RNA	2.01e-142	hypothetical protein H5410_000586	7.34e-65	#N/A	#N/A	26S proteasome regulatory complex, subunit RPN8/PSMD7	1.88e-58	COG1310@1|root,KOG1556@2759|Eukaryota,37J0U@33090|Viridiplantae,3G77D@35493|Streptophyta,44DKV@71274|asterids	1.58e-60	26S proteasome non-ATPase regulatory subunit 7 homolog A OS=Arabidopsis thaliana OX=3702 GN=RPN8A PE=1 SV=1	6.33e-58	MitMem_reg
PB.142.14	ko:K03038	GO:0000003,GO:0000502,GO:0003006,GO:0005575,GO:0005622,GO:0005623,GO:0005634,GO:0006508,GO:0006511,GO:0006807,GO:0007275,GO:0008150,GO:0008152,GO:0009056,GO:0009057,GO:0009790,GO:0009791,GO:0009793,GO:0009987,GO:0010154,GO:0010498,GO:0019538,GO:0019941,GO:0022414,GO:0030163,GO:0032501,GO:0032502,GO:0032991,GO:0043161,GO:0043170,GO:0043226,GO:0043227,GO:0043229,GO:0043231,GO:0043632,GO:0044237,GO:…	PREDICTED: Solanum pennellii 26S proteasome non-ATPase regulatory subunit 7 homolog A (LOC107008203), transcript variant X2, misc_RNA	0	hypothetical protein KY284_003874	0	#N/A	#N/A	26S proteasome regulatory complex, subunit RPN8/PSMD7	0	COG1310@1|root,KOG1556@2759|Eukaryota,37J0U@33090|Viridiplantae,3G77D@35493|Streptophyta,44DKV@71274|asterids	8.89e-218	26S proteasome non-ATPase regulatory subunit 7 homolog A OS=Arabidopsis thaliana OX=3702 GN=RPN8A PE=1 SV=1	0	JAB & MitMem_reg
PB.143.1	ko:K13412	-	PREDICTED: Solanum tuberosum calcium-dependent protein kinase 8-like (LOC102594770), mRNA	0	hypothetical protein H5410_000624	0	putative serine/threonine protein kinase [Kitasatospora setae KM-6054]	4.63e-30	Ca2+/calmodulin-dependent protein kinase, EF-Hand protein superfamily	0	KOG0032@1|root,KOG0032@2759|Eukaryota,37MAH@33090|Viridiplantae,3GB1K@35493|Streptophyta,44NQG@71274|asterids	0.0	Calcium-dependent protein kinase 8 OS=Arabidopsis thaliana OX=3702 GN=CPK8 PE=1 SV=1	0	Pkinase & PK_Tyr_Ser-Thr & EF-hand_7 & EF-hand_1 & EF-hand_6
PB.143.2	ko:K13412	-	PREDICTED: Solanum tuberosum calcium-dependent protein kinase 8-like (LOC102594770), mRNA	0	hypothetical protein H5410_000624	0	putative serine/threonine protein kinase [Kitasatospora setae KM-6054]	4.63e-30	Ca2+/calmodulin-dependent protein kinase, EF-Hand protein superfamily	0	KOG0032@1|root,KOG0032@2759|Eukaryota,37MAH@33090|Viridiplantae,3GB1K@35493|Streptophyta,44NQG@71274|asterids	0.0	Calcium-dependent protein kinase 8 OS=Arabidopsis thaliana OX=3702 GN=CPK8 PE=1 SV=1	0	Pkinase & PK_Tyr_Ser-Thr & EF-hand_7 & EF-hand_1 & EF-hand_6
PB.144.1	ko:K12275	GO:0005575,GO:0005622,GO:0005623,GO:0005737,GO:0005783,GO:0005789,GO:0005791,GO:0006605,GO:0006612,GO:0006620,GO:0006810,GO:0006886,GO:0008104,GO:0008150,GO:0012505,GO:0015031,GO:0015833,GO:0016020,GO:0030867,GO:0031090,GO:0031205,GO:0031207,GO:0031984,GO:0032991,GO:0033036,GO:0033365,GO:0034613,GO:0042175,GO:0042886,GO:0043226,GO:0043227,GO:0043229,GO:0043231,GO:0044422,GO:0044424,GO:0044425,GO:…	PREDICTED: Solanum tuberosum uncharacterized LOC102595104 (LOC102595104), mRNA	0	hypothetical protein H5410_000631	0	#N/A	#N/A	#N/A	#N/A	COG5232@1|root,KOG2927@2759|Eukaryota,37Q7D@33090|Viridiplantae,3GE4Z@35493|Streptophyta,44RMD@71274|asterids	6.05e-244	Translocation protein SEC62 OS=Yarrowia lipolytica (strain CLIB 122 / E 150) OX=284591 GN=SEC62 PE=3 SV=2	1.9e-06	Sec62
PB.144.2	ko:K12275	GO:0005575,GO:0005622,GO:0005623,GO:0005737,GO:0005783,GO:0005789,GO:0005791,GO:0006605,GO:0006612,GO:0006620,GO:0006810,GO:0006886,GO:0008104,GO:0008150,GO:0012505,GO:0015031,GO:0015833,GO:0016020,GO:0030867,GO:0031090,GO:0031205,GO:0031207,GO:0031984,GO:0032991,GO:0033036,GO:0033365,GO:0034613,GO:0042175,GO:0042886,GO:0043226,GO:0043227,GO:0043229,GO:0043231,GO:0044422,GO:0044424,GO:0044425,GO:…	PREDICTED: Solanum tuberosum uncharacterized LOC102595104 (LOC102595104), mRNA	0	hypothetical protein H5410_000631	0	#N/A	#N/A	#N/A	#N/A	COG5232@1|root,KOG2927@2759|Eukaryota,37Q7D@33090|Viridiplantae,3GE4Z@35493|Streptophyta,44RMD@71274|asterids	8.94e-244	Translocation protein SEC62 OS=Yarrowia lipolytica (strain CLIB 122 / E 150) OX=284591 GN=SEC62 PE=3 SV=2	1.98e-06	Sec62
PB.145.1	ko:K22071	-	PREDICTED: Solanum tuberosum adrenodoxin-like protein 2, mitochondrial (LOC102598716), mRNA	0	hypothetical protein KY290_003703	3.02e-155	ferredoxin [Rickettsia conorii str. Malish 7]	9.32e-45	Ferredoxin	8.22e-35	COG0633@1|root,KOG3309@2759|Eukaryota,37TZ6@33090|Viridiplantae,3GI77@35493|Streptophyta,44NYX@71274|asterids	1.63e-152	Adrenodoxin-like protein 1, mitochondrial OS=Arabidopsis thaliana OX=3702 GN=MFDX1 PE=1 SV=1	8.42e-75	Fer2
PB.146.1	ko:K03066	GO:0000502,GO:0003674,GO:0003824,GO:0005488,GO:0005515,GO:0005575,GO:0005622,GO:0005623,GO:0005634,GO:0005737,GO:0005829,GO:0005886,GO:0006355,GO:0006357,GO:0006508,GO:0006511,GO:0006807,GO:0006950,GO:0008134,GO:0008150,GO:0008152,GO:0009056,GO:0009057,GO:0009889,GO:0009891,GO:0009893,GO:0009894,GO:0009896,GO:0009987,GO:0010033,GO:0010243,GO:0010468,GO:0010498,GO:0010556,GO:0010557,GO:0010604,GO:…	PREDICTED: Solanum tuberosum 26S protease regulatory subunit 8 homolog A (LOC102596259), mRNA	0	TAT-binding protein homolog, partial	1.92e-76	proteasome-activating nucleotidase [Methanotorris igneus Kol 5]	6.22e-38	26S proteasome regulatory complex, ATPase RPT6	3.21e-76	COG0554@1|root,KOG0728@2759|Eukaryota,37R03@33090|Viridiplantae,3G7UD@35493|Streptophyta,44NG1@71274|asterids	1.36e-70	26S proteasome regulatory subunit 8 homolog A OS=Arabidopsis thaliana OX=3702 GN=RPT6A PE=1 SV=1	1.26e-75	AAA_lid_3
PB.146.2	ko:K03066	GO:0000502,GO:0003674,GO:0003824,GO:0005488,GO:0005515,GO:0005575,GO:0005622,GO:0005623,GO:0005634,GO:0005737,GO:0005829,GO:0005886,GO:0006355,GO:0006357,GO:0006508,GO:0006511,GO:0006807,GO:0006950,GO:0008134,GO:0008150,GO:0008152,GO:0009056,GO:0009057,GO:0009889,GO:0009891,GO:0009893,GO:0009894,GO:0009896,GO:0009987,GO:0010033,GO:0010243,GO:0010468,GO:0010498,GO:0010556,GO:0010557,GO:0010604,GO:…	PREDICTED: Solanum tuberosum 26S protease regulatory subunit 8 homolog A (LOC102596259), mRNA	0	hypothetical protein KY289_025733	0	proteasome-activating nucleotidase [Pyrococcus furiosus DSM 3638]	7.55e-130	26S proteasome regulatory complex, ATPase RPT6	0	COG0554@1|root,KOG0728@2759|Eukaryota,37R03@33090|Viridiplantae,3G7UD@35493|Streptophyta,44NG1@71274|asterids	1.96e-291	26S proteasome regulatory subunit 8 homolog A OS=Arabidopsis thaliana OX=3702 GN=RPT6A PE=1 SV=1	0	Prot_ATP_ID_OB & AAA & AAA_2 & AAA_lid_3
PB.146.3	ko:K03066	GO:0000502,GO:0003674,GO:0003824,GO:0005488,GO:0005515,GO:0005575,GO:0005622,GO:0005623,GO:0005634,GO:0005737,GO:0005829,GO:0005886,GO:0006355,GO:0006357,GO:0006508,GO:0006511,GO:0006807,GO:0006950,GO:0008134,GO:0008150,GO:0008152,GO:0009056,GO:0009057,GO:0009889,GO:0009891,GO:0009893,GO:0009894,GO:0009896,GO:0009987,GO:0010033,GO:0010243,GO:0010468,GO:0010498,GO:0010556,GO:0010557,GO:0010604,GO:…	PREDICTED: Solanum tuberosum 26S protease regulatory subunit 8 homolog A (LOC102596259), mRNA	0	hypothetical protein KY289_025733	0	proteasome-activating nucleotidase [Pyrococcus furiosus DSM 3638]	7.55e-130	26S proteasome regulatory complex, ATPase RPT6	0	COG0554@1|root,KOG0728@2759|Eukaryota,37R03@33090|Viridiplantae,3G7UD@35493|Streptophyta,44NG1@71274|asterids	1.96e-291	26S proteasome regulatory subunit 8 homolog A OS=Arabidopsis thaliana OX=3702 GN=RPT6A PE=1 SV=1	0	Prot_ATP_ID_OB & AAA & AAA_2 & AAA_lid_3
PB.146.4	ko:K03066	GO:0000502,GO:0003674,GO:0003824,GO:0005488,GO:0005515,GO:0005575,GO:0005622,GO:0005623,GO:0005634,GO:0005737,GO:0005829,GO:0005886,GO:0006355,GO:0006357,GO:0006508,GO:0006511,GO:0006807,GO:0006950,GO:0008134,GO:0008150,GO:0008152,GO:0009056,GO:0009057,GO:0009889,GO:0009891,GO:0009893,GO:0009894,GO:0009896,GO:0009987,GO:0010033,GO:0010243,GO:0010468,GO:0010498,GO:0010556,GO:0010557,GO:0010604,GO:…	PREDICTED: Solanum tuberosum 26S protease regulatory subunit 8 homolog A (LOC102596259), mRNA	0	TAT-binding protein homolog, partial	5.79e-110	proteasome-activating nucleotidase [Methanotorris igneus Kol 5]	5.97e-54	26S proteasome regulatory complex, ATPase RPT6	3.09e-110	COG0554@1|root,KOG0728@2759|Eukaryota,37R03@33090|Viridiplantae,3G7UD@35493|Streptophyta,44NG1@71274|asterids	2.77e-102	26S proteasome regulatory subunit 8 homolog B OS=Arabidopsis thaliana OX=3702 GN=RPT6B PE=1 SV=1	1.31e-109	AAA & AAA_lid_3 & Prot_ATP_ID_OB
PB.146.5	ko:K03066	GO:0000502,GO:0003674,GO:0003824,GO:0005488,GO:0005515,GO:0005575,GO:0005622,GO:0005623,GO:0005634,GO:0005737,GO:0005829,GO:0005886,GO:0006355,GO:0006357,GO:0006508,GO:0006511,GO:0006807,GO:0006950,GO:0008134,GO:0008150,GO:0008152,GO:0009056,GO:0009057,GO:0009889,GO:0009891,GO:0009893,GO:0009894,GO:0009896,GO:0009987,GO:0010033,GO:0010243,GO:0010468,GO:0010498,GO:0010556,GO:0010557,GO:0010604,GO:…	PREDICTED: Solanum tuberosum 26S protease regulatory subunit 8 homolog A (LOC102596259), mRNA	0	TAT-binding protein homolog, partial	5.37e-77	proteasome-activating nucleotidase [Methanotorris igneus Kol 5]	1.34e-38	26S proteasome regulatory complex, ATPase RPT6	7.18e-77	COG0554@1|root,KOG0728@2759|Eukaryota,37R03@33090|Viridiplantae,3G7UD@35493|Streptophyta,44NG1@71274|asterids	1.77e-71	26S proteasome regulatory subunit 8 homolog B OS=Arabidopsis thaliana OX=3702 GN=RPT6B PE=1 SV=1	2.76e-76	AAA_lid_3
PB.146.6	ko:K03066	GO:0000502,GO:0003674,GO:0003824,GO:0005488,GO:0005515,GO:0005575,GO:0005622,GO:0005623,GO:0005634,GO:0005737,GO:0005829,GO:0005886,GO:0006355,GO:0006357,GO:0006508,GO:0006511,GO:0006807,GO:0006950,GO:0008134,GO:0008150,GO:0008152,GO:0009056,GO:0009057,GO:0009889,GO:0009891,GO:0009893,GO:0009894,GO:0009896,GO:0009987,GO:0010033,GO:0010243,GO:0010468,GO:0010498,GO:0010556,GO:0010557,GO:0010604,GO:…	PREDICTED: Solanum tuberosum 26S protease regulatory subunit 8 homolog A (LOC102596259), mRNA	0	hypothetical protein KY289_025733	0	proteasome-activating nucleotidase [Pyrococcus furiosus DSM 3638]	7.55e-130	26S proteasome regulatory complex, ATPase RPT6	0	COG0554@1|root,KOG0728@2759|Eukaryota,37R03@33090|Viridiplantae,3G7UD@35493|Streptophyta,44NG1@71274|asterids	1.96e-291	26S proteasome regulatory subunit 8 homolog A OS=Arabidopsis thaliana OX=3702 GN=RPT6A PE=1 SV=1	0	Prot_ATP_ID_OB & AAA & AAA_2 & AAA_lid_3
PB.146.7	ko:K03066	GO:0000502,GO:0003674,GO:0003824,GO:0005488,GO:0005515,GO:0005575,GO:0005622,GO:0005623,GO:0005634,GO:0005737,GO:0005829,GO:0005886,GO:0006355,GO:0006357,GO:0006508,GO:0006511,GO:0006807,GO:0006950,GO:0008134,GO:0008150,GO:0008152,GO:0009056,GO:0009057,GO:0009889,GO:0009891,GO:0009893,GO:0009894,GO:0009896,GO:0009987,GO:0010033,GO:0010243,GO:0010468,GO:0010498,GO:0010556,GO:0010557,GO:0010604,GO:…	PREDICTED: Solanum tuberosum 26S protease regulatory subunit 8 homolog A (LOC102596259), mRNA	0	PREDICTED: 26S protease regulatory subunit 8 homolog A	0	proteasome-activating nucleotidase [Methanopyrus kandleri AV19]	5.03e-123	26S proteasome regulatory complex, ATPase RPT6	0	COG0554@1|root,KOG0728@2759|Eukaryota,37R03@33090|Viridiplantae,3G7UD@35493|Streptophyta,44NG1@71274|asterids	8.95e-231	26S proteasome regulatory subunit 8 homolog A OS=Arabidopsis thaliana OX=3702 GN=RPT6A PE=1 SV=1	0	Prot_ATP_ID_OB & AAA_5 & AAA & AAA_2 & AAA_lid_3
PB.146.8	ko:K03066	GO:0000502,GO:0003674,GO:0003824,GO:0005488,GO:0005515,GO:0005575,GO:0005622,GO:0005623,GO:0005634,GO:0005737,GO:0005829,GO:0005886,GO:0006355,GO:0006357,GO:0006508,GO:0006511,GO:0006807,GO:0006950,GO:0008134,GO:0008150,GO:0008152,GO:0009056,GO:0009057,GO:0009889,GO:0009891,GO:0009893,GO:0009894,GO:0009896,GO:0009987,GO:0010033,GO:0010243,GO:0010468,GO:0010498,GO:0010556,GO:0010557,GO:0010604,GO:…	PREDICTED: Solanum tuberosum 26S protease regulatory subunit 8 homolog A (LOC102596259), mRNA	0	hypothetical protein KY289_025733	0	proteasome-activating nucleotidase [Pyrococcus furiosus DSM 3638]	7.55e-130	26S proteasome regulatory complex, ATPase RPT6	0	COG0554@1|root,KOG0728@2759|Eukaryota,37R03@33090|Viridiplantae,3G7UD@35493|Streptophyta,44NG1@71274|asterids	1.96e-291	26S proteasome regulatory subunit 8 homolog A OS=Arabidopsis thaliana OX=3702 GN=RPT6A PE=1 SV=1	0	Prot_ATP_ID_OB & AAA & AAA_2 & AAA_lid_3
PB.146.9	ko:K03066	GO:0000502,GO:0003674,GO:0003824,GO:0005488,GO:0005515,GO:0005575,GO:0005622,GO:0005623,GO:0005634,GO:0005737,GO:0005829,GO:0005886,GO:0006355,GO:0006357,GO:0006508,GO:0006511,GO:0006807,GO:0006950,GO:0008134,GO:0008150,GO:0008152,GO:0009056,GO:0009057,GO:0009889,GO:0009891,GO:0009893,GO:0009894,GO:0009896,GO:0009987,GO:0010033,GO:0010243,GO:0010468,GO:0010498,GO:0010556,GO:0010557,GO:0010604,GO:…	PREDICTED: Solanum tuberosum 26S protease regulatory subunit 8 homolog A (LOC102596259), mRNA	0	hypothetical protein KY289_025733	0	proteasome-activating nucleotidase [Pyrococcus furiosus DSM 3638]	7.88e-127	26S proteasome regulatory complex, ATPase RPT6	0	COG0554@1|root,KOG0728@2759|Eukaryota,37R03@33090|Viridiplantae,3G7UD@35493|Streptophyta,44NG1@71274|asterids	4.03e-275	26S proteasome regulatory subunit 8 homolog A OS=Arabidopsis thaliana OX=3702 GN=RPT6A PE=1 SV=1	0	Prot_ATP_ID_OB & AAA & AAA_2 & AAA_lid_3
PB.146.10	ko:K03066	GO:0000502,GO:0003674,GO:0003824,GO:0005488,GO:0005515,GO:0005575,GO:0005622,GO:0005623,GO:0005634,GO:0005737,GO:0005829,GO:0005886,GO:0006355,GO:0006357,GO:0006508,GO:0006511,GO:0006807,GO:0006950,GO:0008134,GO:0008150,GO:0008152,GO:0009056,GO:0009057,GO:0009889,GO:0009891,GO:0009893,GO:0009894,GO:0009896,GO:0009987,GO:0010033,GO:0010243,GO:0010468,GO:0010498,GO:0010556,GO:0010557,GO:0010604,GO:…	PREDICTED: Solanum tuberosum 26S protease regulatory subunit 8 homolog A (LOC102583713), mRNA	0	hypothetical protein KY289_025733	5.42e-180	proteasome-activating nucleotidase [Methanothermus fervidus DSM 2088]	1.64e-61	26S proteasome regulatory complex, ATPase RPT6	4.69e-157	COG0554@1|root,KOG0728@2759|Eukaryota,37R03@33090|Viridiplantae,3G7UD@35493|Streptophyta,44NG1@71274|asterids	2.89e-168	26S proteasome regulatory subunit 8 homolog A OS=Arabidopsis thaliana OX=3702 GN=RPT6A PE=1 SV=1	7.27e-159	Prot_ATP_ID_OB & AAA
PB.147.1	-	-	PREDICTED: Solanum tuberosum cinnamoyl-CoA reductase 1-like (LOC102584059), mRNA	0	hypothetical protein KY289_004055	0	NAD-dependent epimerase/dehydratase [Prosthecochloris aestuarii DSM 271]	8.06e-72	Flavonol reductase/cinnamoyl-CoA reductase	0	COG0451@1|root,KOG1502@2759|Eukaryota,37J0J@33090|Viridiplantae,3GC0M@35493|Streptophyta,44FQ9@71274|asterids	3.77e-234	Phenylacetaldehyde reductase OS=Rosa hybrid cultivar OX=128735 GN=PAR PE=1 SV=1	0	Epimerase & NmrA & 3Beta_HSD & NAD_binding_4 & GDP_Man_Dehyd & NAD_binding_10
PB.148.1	-	-	PREDICTED: Solanum pennellii cinnamoyl-CoA reductase 1-like (LOC107008093), mRNA	0	cinnamoyl-CoA reductase 1-like	0	NAD-dependent epimerase/dehydratase [Prosthecochloris aestuarii DSM 271]	1.74e-70	Flavonol reductase/cinnamoyl-CoA reductase	2.85e-178	COG0451@1|root,KOG1502@2759|Eukaryota,37J0J@33090|Viridiplantae,3GC0M@35493|Streptophyta,44NM2@71274|asterids	3.96e-226	Phenylacetaldehyde reductase OS=Rosa hybrid cultivar OX=128735 GN=PAR PE=1 SV=1	0	Epimerase & NmrA & 3Beta_HSD & GDP_Man_Dehyd & NAD_binding_4 & NAD_binding_10
PB.148.2	-	-	PREDICTED: Solanum pennellii cinnamoyl-CoA reductase 1-like (LOC107008093), mRNA	0	cinnamoyl-CoA reductase 1-like	0	NAD-dependent epimerase/dehydratase [Prosthecochloris aestuarii DSM 271]	1.74e-70	Flavonol reductase/cinnamoyl-CoA reductase	2.85e-178	COG0451@1|root,KOG1502@2759|Eukaryota,37J0J@33090|Viridiplantae,3GC0M@35493|Streptophyta,44NM2@71274|asterids	3.96e-226	Phenylacetaldehyde reductase OS=Rosa hybrid cultivar OX=128735 GN=PAR PE=1 SV=1	0	Epimerase & NmrA & 3Beta_HSD & GDP_Man_Dehyd & NAD_binding_4 & NAD_binding_10
PB.148.3	-	-	PREDICTED: Solanum pennellii cinnamoyl-CoA reductase 1-like (LOC107008093), mRNA	0	cinnamoyl-CoA reductase 1-like	7.75e-156	NAD-dependent epimerase/dehydratase [Prosthecochloris aestuarii DSM 271]	3.11e-31	Flavonol reductase/cinnamoyl-CoA reductase	4.2e-114	COG0451@1|root,KOG1502@2759|Eukaryota,37J0J@33090|Viridiplantae,3GC0M@35493|Streptophyta,44NM2@71274|asterids	5.6e-151	Phenylacetaldehyde reductase OS=Rosa hybrid cultivar OX=128735 GN=PAR PE=1 SV=1	3.9e-122	3Beta_HSD
PB.149.1	-	-	PREDICTED: Solanum tuberosum glycerophosphodiester phosphodiesterase protein kinase domain-containing GDPDL2-like (LOC102585361), mRNA	0	hypothetical protein KY290_000297	0	hypothetical protein Aasi_1443 [Candidatus Amoebophilus asiaticus 5a2]	7.81e-26	Serine/threonine protein kinase	3.99e-106	COG0515@1|root,KOG1187@2759|Eukaryota,37MEY@33090|Viridiplantae,3GC2U@35493|Streptophyta,44PET@71274|asterids	0.0	Rust resistance kinase Lr10 OS=Triticum aestivum OX=4565 GN=LRK10 PE=2 SV=1	4.44e-120	GUB_WAK_bind & Pkinase & PK_Tyr_Ser-Thr
PB.150.1	ko:K00858	-	PREDICTED: Solanum tuberosum NAD(H) kinase 1 (LOC102584378), mRNA	0	PREDICTED: NAD(H) kinase 1	0	NAD(+) kinase [Deferribacter desulfuricans SSM1]	1.31e-40	Predicted sugar kinase	3.32e-73	COG0061@1|root,KOG2178@2759|Eukaryota,37QRM@33090|Viridiplantae,3G9KF@35493|Streptophyta,44FA1@71274|asterids	0.0	NAD(H) kinase 1 OS=Arabidopsis thaliana OX=3702 GN=NADK1 PE=1 SV=2	0	NAD_kinase & NAD_kinase_C
PB.150.2	ko:K00858	-	PREDICTED: Solanum pennellii NAD(H) kinase 1 (LOC107006552), transcript variant X2, mRNA	0	NAD(H) kinase 1 isoform X2	0	NAD(+) kinase [Deferribacter desulfuricans SSM1]	6.44e-41	Predicted sugar kinase	1.52e-73	COG0061@1|root,KOG2178@2759|Eukaryota,37QRM@33090|Viridiplantae,3G9KF@35493|Streptophyta,44FA1@71274|asterids	0.0	NAD(H) kinase 1 OS=Arabidopsis thaliana OX=3702 GN=NADK1 PE=1 SV=2	0	NAD_kinase & NAD_kinase_C
PB.150.3	ko:K00858	-	PREDICTED: Solanum tuberosum NAD(H) kinase 1 (LOC102584378), mRNA	0	hypothetical protein H5410_000657	0	NAD(+) kinase [Deferribacter desulfuricans SSM1]	1.19e-41	Predicted sugar kinase	1.19e-73	COG0061@1|root,KOG2178@2759|Eukaryota,37QRM@33090|Viridiplantae,3G9KF@35493|Streptophyta,44FA1@71274|asterids	0.0	Probable NAD kinase 1 OS=Oryza sativa subsp. japonica OX=39947 GN=Os01g0957000 PE=2 SV=1	0	NAD_kinase & NAD_kinase_C
PB.151.1	ko:K00512,ko:K07418,ko:K15472	GO:0003674,GO:0003824,GO:0004497,GO:0005575,GO:0008150,GO:0008152,GO:0009058,GO:0016020,GO:0016491,GO:0016705,GO:0016709,GO:0019748,GO:0044550,GO:0055114	PREDICTED: Solanum tuberosum premnaspirodiene oxygenase-like (LOC102594554), mRNA	0	hypothetical protein H5410_000680	0	cytochrome P450 [Spirosoma linguale DSM 74]	8e-36	Cytochrome P450 CYP2 subfamily	1.25e-128	COG2124@1|root,KOG0156@2759|Eukaryota,37QA7@33090|Viridiplantae,3GDM1@35493|Streptophyta,44P4N@71274|asterids	0.0	Premnaspirodiene oxygenase OS=Hyoscyamus muticus OX=35626 GN=CYP71D55 PE=1 SV=1	0	p450
PB.152.1	ko:K00512,ko:K07418,ko:K15472	GO:0003674,GO:0003824,GO:0004497,GO:0005575,GO:0008150,GO:0008152,GO:0009058,GO:0016020,GO:0016491,GO:0016705,GO:0016709,GO:0019748,GO:0044550,GO:0055114	Solanum tuberosum cultivar Solyntus chromosome 1	0	PREDICTED: premnaspirodiene oxygenase-like	9.62e-66	#N/A	#N/A	Cytochrome P450 CYP2 subfamily	1.96e-19	COG2124@1|root,KOG0156@2759|Eukaryota,37QA7@33090|Viridiplantae,3GDM1@35493|Streptophyta,44NI6@71274|asterids	2.33e-55	Premnaspirodiene oxygenase OS=Hyoscyamus muticus OX=35626 GN=CYP71D55 PE=1 SV=1	6.46e-49	p450
PB.152.2	ko:K00512,ko:K07418,ko:K15472	GO:0003674,GO:0003824,GO:0004497,GO:0005575,GO:0008150,GO:0008152,GO:0009058,GO:0016020,GO:0016491,GO:0016705,GO:0016709,GO:0019748,GO:0044550,GO:0055114	Solanum tuberosum cultivar Solyntus chromosome 1	0	PREDICTED: premnaspirodiene oxygenase-like	4.99e-118	cytochrome P450 [Haliangium ochraceum DSM 14365]	3.15e-07	Cytochrome P450 CYP2 subfamily	5.19e-38	COG2124@1|root,KOG0156@2759|Eukaryota,37QA7@33090|Viridiplantae,3GDM1@35493|Streptophyta,44NI6@71274|asterids	5.1e-100	Premnaspirodiene oxygenase OS=Hyoscyamus muticus OX=35626 GN=CYP71D55 PE=1 SV=1	2.9e-86	p450
PB.152.3	ko:K00512,ko:K07418,ko:K15472	GO:0003674,GO:0003824,GO:0004497,GO:0005575,GO:0008150,GO:0008152,GO:0009058,GO:0016020,GO:0016491,GO:0016705,GO:0016709,GO:0019748,GO:0044550,GO:0055114	PREDICTED: Capsicum annuum premnaspirodiene oxygenase (LOC107874295), transcript variant X1, mRNA	0	hypothetical protein H5410_000712	0	cytochrome P450 [Polymorphum gilvum SL003B-26A1]	5.37e-36	Cytochrome P450 CYP2 subfamily	7.64e-111	COG2124@1|root,KOG0156@2759|Eukaryota,37QA7@33090|Viridiplantae,3GDM1@35493|Streptophyta,44NI6@71274|asterids	4.7e-298	Premnaspirodiene oxygenase OS=Hyoscyamus muticus OX=35626 GN=CYP71D55 PE=1 SV=1	0	p450
PB.153.1	-	-	PREDICTED: Solanum pennellii Holliday junction resolvase MOC1, chloroplastic-like (LOC107008523), mRNA	0	hypothetical protein KY284_003885	0	#N/A	#N/A	#N/A	#N/A	28IQY@1|root,2QR28@2759|Eukaryota,37QGJ@33090|Viridiplantae,3GH0X@35493|Streptophyta,44C7D@71274|asterids	5.15e-195	Holliday junction resolvase MOC1, chloroplastic OS=Arabidopsis thaliana OX=3702 GN=MOC1 PE=1 SV=1	1.64e-73	#N/A
PB.153.2	-	-	PREDICTED: Solanum pennellii Holliday junction resolvase MOC1, chloroplastic-like (LOC107008523), mRNA	0	Holliday junction resolvase MOC1, chloroplastic-like	5.18e-111	#N/A	#N/A	#N/A	#N/A	28IQY@1|root,2QR28@2759|Eukaryota,37QGJ@33090|Viridiplantae,3GH0X@35493|Streptophyta,44C7D@71274|asterids	3.61e-114	Holliday junction resolvase MOC1, chloroplastic OS=Arabidopsis thaliana OX=3702 GN=MOC1 PE=1 SV=1	3.7e-29	#N/A
PB.154.1	-	GO:0003674,GO:0003676,GO:0003723,GO:0003729,GO:0005488,GO:0097159,GO:1901363	PREDICTED: Solanum tuberosum zinc finger CCCH domain-containing protein 53 (LOC102586367), transcript variant X2, mRNA	0	hypothetical protein H5410_000666	0	#N/A	#N/A	#N/A	#N/A	28KBE@1|root,2QSSE@2759|Eukaryota,37HVQ@33090|Viridiplantae,3GGA4@35493|Streptophyta,44I1Y@71274|asterids	0.0	Zinc finger CCCH domain-containing protein 53 OS=Oryza sativa subsp. japonica OX=39947 GN=Os07g0682400 PE=2 SV=1	2.95e-120	zf-CCCH
PB.154.2	-	GO:0003674,GO:0003676,GO:0003723,GO:0003729,GO:0005488,GO:0097159,GO:1901363	PREDICTED: Solanum tuberosum zinc finger CCCH domain-containing protein 53 (LOC102586367), transcript variant X2, mRNA	0	PREDICTED: zinc finger CCCH domain-containing protein 53 isoform X2	0	#N/A	#N/A	#N/A	#N/A	28KBE@1|root,2QSSE@2759|Eukaryota,37HVQ@33090|Viridiplantae,3GGA4@35493|Streptophyta,44I1Y@71274|asterids	0.0	Zinc finger CCCH domain-containing protein 53 OS=Oryza sativa subsp. japonica OX=39947 GN=Os07g0682400 PE=2 SV=1	5.49e-121	zf-CCCH
PB.155.1	-	GO:0005575,GO:0005622,GO:0005623,GO:0005634,GO:0005654,GO:0005730,GO:0016592,GO:0031974,GO:0031981,GO:0032991,GO:0043226,GO:0043227,GO:0043228,GO:0043229,GO:0043231,GO:0043232,GO:0043233,GO:0044422,GO:0044424,GO:0044428,GO:0044446,GO:0044451,GO:0044464,GO:0070013	PREDICTED: Solanum tuberosum mediator-associated protein 2-like (LOC102581829), mRNA	0	PREDICTED: mediator-associated protein 2-like	9.86e-150	#N/A	#N/A	#N/A	#N/A	2CHDU@1|root,2RZN5@2759|Eukaryota,37UGK@33090|Viridiplantae,3GJ2H@35493|Streptophyta,44KJ6@71274|asterids	1.12e-137	Mediator-associated protein 2 OS=Arabidopsis thaliana OX=3702 GN=At5g64680 PE=1 SV=1	2.05e-17	#N/A
PB.156.1	-	GO:0000278,GO:0000280,GO:0000281,GO:0000910,GO:0000911,GO:0000919,GO:0003674,GO:0005096,GO:0005575,GO:0005622,GO:0005623,GO:0005737,GO:0005886,GO:0006996,GO:0007049,GO:0008047,GO:0008150,GO:0009507,GO:0009534,GO:0009535,GO:0009536,GO:0009579,GO:0009832,GO:0009920,GO:0009987,GO:0016020,GO:0016043,GO:0022402,GO:0022607,GO:0030234,GO:0030695,GO:0031976,GO:0031984,GO:0032506,GO:0034357,GO:0042546,GO:…	PREDICTED: Solanum pennellii rho GTPase-activating protein 7-like (LOC107006844), transcript variant X1, mRNA	0	hypothetical protein KY285_004338	0	#N/A	#N/A	Rho-GTPase activating protein	0	KOG4271@1|root,KOG4271@2759|Eukaryota,37NF0@33090|Viridiplantae,3GD52@35493|Streptophyta,44PK9@71274|asterids	0.0	Rho GTPase-activating protein 7 OS=Arabidopsis thaliana OX=3702 GN=ROPGAP7 PE=2 SV=1	0	RhoGAP & Lzipper-MIP1
PB.156.2	-	GO:0000278,GO:0000280,GO:0000281,GO:0000910,GO:0000911,GO:0000919,GO:0003674,GO:0005096,GO:0005575,GO:0005622,GO:0005623,GO:0005737,GO:0005886,GO:0006996,GO:0007049,GO:0008047,GO:0008150,GO:0009507,GO:0009534,GO:0009535,GO:0009536,GO:0009579,GO:0009832,GO:0009920,GO:0009987,GO:0016020,GO:0016043,GO:0022402,GO:0022607,GO:0030234,GO:0030695,GO:0031976,GO:0031984,GO:0032506,GO:0034357,GO:0042546,GO:…	PREDICTED: Solanum pennellii rho GTPase-activating protein 7-like (LOC107006844), transcript variant X2, mRNA	0	hypothetical protein KY285_004338	0	#N/A	#N/A	Rho-GTPase activating protein	0	KOG4271@1|root,KOG4271@2759|Eukaryota,37NF0@33090|Viridiplantae,3GD52@35493|Streptophyta,44PK9@71274|asterids	0.0	Rho GTPase-activating protein 7 OS=Arabidopsis thaliana OX=3702 GN=ROPGAP7 PE=2 SV=1	0	PH & RhoGAP & Lzipper-MIP1
PB.156.3	-	GO:0000278,GO:0000280,GO:0000281,GO:0000910,GO:0000911,GO:0000919,GO:0003674,GO:0005096,GO:0005575,GO:0005622,GO:0005623,GO:0005737,GO:0005886,GO:0006996,GO:0007049,GO:0008047,GO:0008150,GO:0009507,GO:0009534,GO:0009535,GO:0009536,GO:0009579,GO:0009832,GO:0009920,GO:0009987,GO:0016020,GO:0016043,GO:0022402,GO:0022607,GO:0030234,GO:0030695,GO:0031976,GO:0031984,GO:0032506,GO:0034357,GO:0042546,GO:…	PREDICTED: Solanum pennellii rho GTPase-activating protein 7-like (LOC107006844), transcript variant X2, mRNA	0	hypothetical protein KY285_004338	0	#N/A	#N/A	Rho-GTPase activating protein	0	KOG4271@1|root,KOG4271@2759|Eukaryota,37NF0@33090|Viridiplantae,3GD52@35493|Streptophyta,44PK9@71274|asterids	0.0	Rho GTPase-activating protein 7 OS=Arabidopsis thaliana OX=3702 GN=ROPGAP7 PE=2 SV=1	0	PH & RhoGAP & Lzipper-MIP1
PB.156.4	-	GO:0000278,GO:0000280,GO:0000281,GO:0000910,GO:0000911,GO:0000919,GO:0003674,GO:0005096,GO:0005575,GO:0005622,GO:0005623,GO:0005737,GO:0005886,GO:0006996,GO:0007049,GO:0008047,GO:0008150,GO:0009507,GO:0009534,GO:0009535,GO:0009536,GO:0009579,GO:0009832,GO:0009920,GO:0009987,GO:0016020,GO:0016043,GO:0022402,GO:0022607,GO:0030234,GO:0030695,GO:0031976,GO:0031984,GO:0032506,GO:0034357,GO:0042546,GO:…	PREDICTED: Solanum pennellii rho GTPase-activating protein 7-like (LOC107006844), transcript variant X2, mRNA	0	hypothetical protein KY285_004338	0	#N/A	#N/A	Rho-GTPase activating protein	0	KOG4271@1|root,KOG4271@2759|Eukaryota,37NF0@33090|Viridiplantae,3GD52@35493|Streptophyta,44PK9@71274|asterids	0.0	Rho GTPase-activating protein 7 OS=Arabidopsis thaliana OX=3702 GN=ROPGAP7 PE=2 SV=1	0	PH & RhoGAP & Lzipper-MIP1
[truncated: 48,641 more rows]
