# Supplementary material for: Integrated Full-Length Transcriptome and Metabolome Profiling Reveals Flavonoid Regulation in Response to Freezing Stress in Potato
Source: Plants (Basel). 2023 May 22;12(10):2054. doi: 10.3390/plants12102054 (PMC10223400; doi:10.3390/plants12102054)
Supplement: Supplementary file 1 [file plants-12-02054-s001.zip › Table S2.xlsx]

## Sheet: Sheet1
Table S2: DEGs in DM and CM under freezing treatment.
DM-3h VS DM-0h			DM-6h VS DM-0h			DM-12h VS DM-0h			DM-6h VS DM-3h			DM-12h VS DM-6h			DM-12h VS DM-3h			CM-3h VS CM-0h				CM-6h VS CM-0h			CM-12h VS CM-0h			CM-6h VS CM-3h			CM-12h VS CM-6h			CM-12h VS CM-3h			CM-0h VS DM-0h			CM-3h VS DM-3h			CM-6h VS DM-6h			CM-12h VS DM-12h
log2FoldChange	qvalue	Group	log2FoldChange	qvalue	Group	log2FoldChange	qvalue	Group	log2FoldChange	qvalue	Group	log2FoldChange	qvalue	Group	log2FoldChange	qvalue	Group	Gene_id	log2FoldChange	qvalue	Group	log2FoldChange	qvalue	Group	log2FoldChange	qvalue	Group	log2FoldChange	qvalue	Group	log2FoldChange	qvalue	Group	log2FoldChange	qvalue	Group	log2FoldChange	qvalue	Group	log2FoldChange	qvalue	Group	log2FoldChange	qvalue	Group	log2FoldChange	qvalue	Group
0.0974429	0.901111	insig	-0.273233	0.769461	insig	0.347736	0.572882	insig	-0.395602	0.900941	insig	-0.590199	0.818766	insig	-0.211117	0.818335	insig	PB.2	0.254008	0.855079	insig	0.617299	0.194052	insig	-0.0018884	0.997126	insig	0.369698	0.604795	insig	0.613921	0.178955	insig	0.25871	0.621157	insig	-1.5796	8.05128e-05	up	-1.73128	0.00128436	up	-2.51425	2.63952e-06	up	-1.26555	0.00181153	up
0.382427	0.352017	insig	0.665635	0.350541	insig	1.22006	1.48488e-06	up	0.259477	0.934142	insig	-0.525825	0.861125	insig	-0.80361	0.0678381	insig	PB.4	-0.342489	0.778566	insig	0.173906	0.731269	insig	0.167553	0.710358	insig	0.523096	0.331099	insig	0.00207902	0.996485	insig	-0.505981	0.311738	insig	-0.842926	0.00097916	insig	-0.110619	0.840057	insig	-0.396404	0.561865	insig	0.178274	0.576338	insig
-0.0991561	0.826185	insig	-0.676785	0.161258	insig	-0.512605	0.297791	insig	-0.598109	0.233337	insig	-0.135157	0.980857	insig	0.4384	0.348247	insig	PB.5	0.342218	0.85696	insig	0.122048	0.846487	insig	-0.841123	0.0490288	insig	-0.213061	0.796584	insig	0.95777	0.00609896	insig	1.18401	0.0165509	up	-0.237392	0.547054	insig	-0.67098	0.0796876	insig	-1.07466	0.00248343	up	0.0655202	0.900942	insig
0.498225	0.421772	insig	0.858488	0.171539	insig	0.68191	0.373486	insig	0.340866	0.869086	insig	0.207721	0.983023	insig	-0.154597	0.889507	insig	PB.6	-0.293579	0.859412	insig	-0.185656	0.772005	insig	-0.587237	0.290584	insig	0.114497	0.906102	insig	0.396965	0.489462	insig	0.297483	0.768898	insig	-1.89637	1.37958e-06	up	-1.09974	0.0324507	up	-0.893275	0.0501324	insig	-0.664154	0.390026	insig
-0.468093	0.230429	insig	-0.494454	0.505661	insig	-0.237185	0.494727	insig	-0.0449262	0.991633	insig	-0.228797	0.971555	insig	-0.207412	0.686856	insig	PB.7	0.71899	0.324557	insig	0.284753	0.661393	insig	0.0769488	0.908778	insig	-0.428352	0.584808	insig	0.203156	0.742484	insig	0.643912	0.380393	insig	2.42587	1.0374e-17	down	1.24431	0.00291835	down	1.60864	0.00861343	down	2.08142	1.38396e-12	down
0.386844	0.287483	insig	0.719137	0.217307	insig	0.731654	0.0795948	insig	0.31085	0.895665	insig	0.017567	0.997332	insig	-0.313502	0.585063	insig	PB.9	-0.555576	0.202879	insig	-0.0544451	0.903424	insig	-0.449481	0.12589	insig	0.507013	0.202951	insig	0.390363	0.208694	insig	-0.104059	0.873007	insig	-1.49423	2.82227e-11	up	-0.54609	0.145479	insig	-0.763635	0.118587	insig	-0.346618	0.465787	insig
1.31703	0.0358343	up	2.47952	0.00202025	up	2.39541	0.000412713	up	1.14185	0.412887	insig	0.110568	0.993405	insig	-1.04966	0.104728	insig	PB.10	-0.0954048	0.986444	insig	-0.340892	0.732756	insig	-0.717006	0.413101	insig	-0.236246	0.83396	insig	0.371172	0.514982	insig	0.620009	0.3775	insig	-2.42922	0.000161465	up	-1.01347	0.0564493	insig	0.34392	0.642223	insig	0.647028	0.313084	insig
-0.0250312	0.984915	insig	1.35899	0.395507	insig	2.76485	0.000643763	up	1.36	0.765477	insig	-1.37477	0.800602	insig	-2.75075	0.00328899	down	PB.11	0.443489	0.889567	insig	1.53495	0.00630866	up	1.79154	4.69278e-05	up	1.0939	0.259508	insig	-0.261615	0.695563	insig	-1.34263	0.142065	insig	-0.379271	0.547295	insig	-0.838479	0.418092	insig	-0.596523	0.67142	insig	0.559237	0.576338	insig
-0.682245	0.0176039	insig	-0.280205	0.667463	insig	-1.03923	0.000456296	down	0.381867	0.833104	insig	0.78968	0.582478	insig	0.384221	0.267669	insig	PB.13	-0.436122	0.960905	insig	0.262574	0.898336	insig	0.541762	0.759018	insig	0.706099	0.793319	insig	-0.283187	0.858474	insig	-0.974561	0.740861	insig	5.14545	3.94248e-31	down	4.89566	2.77596e-16	down	4.56442	8.67715e-13	down	3.53839	4.3845e-13	down
0.283879	0.452379	insig	0.892513	0.007804	insig	-0.292962	0.392794	insig	0.585571	0.596233	insig	1.21555	0.0102897	up	0.609798	0.160047	insig	PB.14	-0.0926249	0.973827	insig	-0.0484908	0.957711	insig	1.30571	2.32871e-10	up	0.0452151	0.977738	insig	-1.35948	0.0148429	down	-1.39255	0.00617589	down	-0.540022	0.0139396	insig	-0.156905	0.785612	insig	0.36168	0.592452	insig	-2.16947	3.81316e-15	up
0.616244	0.032734	insig	1.05565	0.0835471	insig	1.09552	0.000127727	up	0.418034	0.84234	insig	-0.0116314	0.997704	insig	-0.451312	0.128631	insig	PB.15	-0.285452	0.769259	insig	0.197052	0.606422	insig	0.62066	0.0119726	insig	0.486777	0.306411	insig	-0.428888	0.158138	insig	-0.902654	0.0175472	insig	-1.03633	1.02393e-05	up	-0.128044	0.719542	insig	-0.220156	0.734269	insig	-0.590927	0.0251662	insig
-0.785112	0.00641279	insig	-0.776772	0.0988901	insig	-1.15989	0.000633934	down	-0.0114699	0.997263	insig	0.415045	0.884317	insig	0.401017	0.419363	insig	PB.16	-0.394772	0.709596	insig	0.064303	0.903424	insig	-0.0855847	0.867749	insig	0.465365	0.0959507	insig	0.145172	0.513706	insig	-0.307594	0.419546	insig	-0.546437	0.0563285	insig	-0.929421	0.00302113	insig	-1.42562	0.000199389	up	-1.64748	1.0077e-05	up
0.594561	0.135537	insig	0.585523	0.406308	insig	0.00694125	0.990134	insig	-0.030398	0.993728	insig	0.610687	0.779752	insig	0.618394	0.127914	insig	PB.17	-0.0795595	0.969508	insig	-0.110866	0.847574	insig	0.730074	0.0109997	insig	-0.0274651	0.977738	insig	-0.846231	0.0183579	insig	-0.806512	0.038922	insig	-0.686333	0.0240326	insig	-0.00548314	0.991517	insig	-0.0291683	0.967821	insig	-1.43825	7.16001e-08	up
-0.174793	0.617974	insig	-0.426846	0.23069	insig	0.468124	0.102884	insig	-0.272493	0.822584	insig	-0.864452	0.0285101	insig	-0.614029	0.0455558	insig	PB.18	0.0427327	0.981139	insig	0.713706	0.113482	insig	-0.58363	0.0417174	insig	0.677502	0.281086	insig	1.29229	0.00243012	up	0.629623	0.044234	insig	1.54766	4.75995e-11	down	1.33525	1.7224e-06	down	0.365083	0.47987	insig	2.56603	6.56855e-29	down
-0.44104	0.118031	insig	-0.669383	0.297898	insig	-0.249022	0.490118	insig	-0.247146	0.919481	insig	-0.387155	0.913718	insig	-0.165523	0.65539	insig	PB.19	-0.0772417	0.969508	insig	-0.0980322	0.825512	insig	-0.295459	0.511129	insig	-0.014697	0.979444	insig	0.192457	0.552469	insig	0.219186	0.732122	insig	1.11037	2.65667e-05	down	0.753498	0.00189213	insig	0.50213	0.375895	insig	1.12955	0.00039519	down
-0.685645	0.00482081	insig	-0.55659	0.134841	insig	-0.209584	0.473803	insig	0.108278	0.93335	insig	-0.318663	0.801644	insig	-0.448478	0.0333413	insig	PB.20	-0.0529139	0.984356	insig	-0.191704	0.692565	insig	0.0517814	0.922853	insig	-0.133382	0.848356	insig	-0.248488	0.483497	insig	-0.103577	0.900023	insig	1.94485	1.14306e-14	down	1.31849	1.67535e-06	down	1.54008	2.76289e-07	down	1.65369	8.74105e-15	down
-0.575367	0.218412	insig	-0.859808	0.139657	insig	-0.115355	0.811981	insig	-0.302401	0.91159	insig	-0.716049	0.686885	insig	-0.438933	0.476851	insig	PB.22	0.270526	0.932043	insig	0.188383	0.781094	insig	-0.156844	0.839266	insig	-0.0807428	0.934889	insig	0.339341	0.308962	insig	0.433381	0.624676	insig	1.32483	0.00045568	down	0.483025	0.441673	insig	0.238815	0.68088	insig	1.33636	0.000260276	down
0.224542	0.479109	insig	-0.252741	0.827772	insig	-1.01823	2.0853e-05	down	-0.496739	0.895665	insig	0.801074	0.82095	insig	1.27264	2.98666e-06	up	PB.23	0.180023	0.743913	insig	0.402939	0.0629844	insig	0.186253	0.594433	insig	0.229365	0.546506	insig	0.211837	0.533441	insig	-0.00327688	0.995612	insig	-0.654204	0.00035607	insig	-0.602784	0.0350576	insig	-1.34661	0.0975859	insig	-1.88845	7.19915e-11	up
1.15651	0.0220858	up	2.36568	0.0124006	up	1.76484	0.000371133	up	1.18692	0.666999	insig	0.630705	0.915845	insig	-0.575371	0.432957	insig	PB.24	-0.655576	0.536743	insig	-0.0738481	0.904446	insig	0.167949	0.776028	insig	0.587256	0.161584	insig	-0.245791	0.205958	insig	-0.819672	0.0686581	insig	-2.656	1.10364e-12	up	-0.837244	0.123186	insig	-0.261256	0.799713	insig	-1.09148	0.0289975	up
0.587914	0.0709584	insig	0.463488	0.583018	insig	-0.169157	0.622927	insig	-0.145829	0.967313	insig	0.665153	0.80717	insig	0.788493	0.0183214	insig	PB.25	-0.268376	0.813386	insig	-0.215625	0.64056	insig	0.195142	0.498822	insig	0.0565467	0.950613	insig	-0.415539	0.260828	insig	-0.459503	0.308037	insig	-0.920053	7.27673e-05	insig	-0.0563174	0.901121	insig	-0.279659	0.724891	insig	-1.31409	5.39223e-10	up
0.030238	0.955482	insig	0.125558	0.875424	insig	0.432021	0.504023	insig	0.0751228	0.975774	insig	-0.275815	0.968817	insig	-0.372498	0.591794	insig	PB.26	0.108915	0.969508	insig	0.43258	0.218553	insig	0.135426	0.785465	insig	0.328221	0.610989	insig	0.29281	0.222188	insig	-0.0218735	0.982214	insig	-1.15771	0.000727444	up	-1.22868	0.00293191	up	-1.50485	0.000110039	up	-0.8941	0.119796	insig
-0.355847	0.192005	insig	-0.345262	0.593376	insig	0.0715024	0.810329	insig	-0.00975104	0.997482	insig	-0.39052	0.884781	insig	-0.401595	0.0966949	insig	PB.28	-0.0352355	0.981971	insig	-0.0810211	0.820173	insig	-0.422085	0.0773889	insig	-0.0398757	0.94387	insig	0.336186	0.178563	insig	0.389248	0.375313	insig	0.963591	1.021e-06	insig	0.648299	0.0179009	insig	0.658386	0.197669	insig	1.42612	9.58518e-17	down
-0.28658	0.337564	insig	0.626065	0.539744	insig	0.148438	0.64599	insig	0.891791	0.729505	insig	0.502335	0.929865	insig	-0.40819	0.106619	insig	PB.29	0.202768	0.908099	insig	-0.291797	0.210131	insig	-0.422461	0.0205011	insig	-0.487094	0.358847	insig	0.125937	0.630979	insig	0.62502	0.213174	insig	-1.23213	2.65673e-09	up	-1.71698	5.00279e-07	up	-0.353912	0.706528	insig	-0.694104	0.000591388	insig
-0.379155	0.25904	insig	-0.750657	0.0787095	insig	-0.223454	0.539428	insig	-0.39288	0.664118	insig	-0.498612	0.577206	insig	-0.127527	0.721049	insig	PB.30	-0.193516	0.88066	insig	0.157866	0.665364	insig	-0.955032	0.0051583	insig	0.357908	0.324795	insig	1.10833	0.000125929	up	0.764293	0.11896	insig	-0.177568	0.55876	insig	-0.355444	0.247569	insig	-1.12631	5.11678e-05	up	0.524248	0.102352	insig
0.116203	0.603397	insig	-0.16324	0.709193	insig	-0.340847	0.143587	insig	-0.299608	0.774468	insig	0.208683	0.941311	insig	0.484818	0.0283477	insig	PB.32	0.213359	0.730436	insig	0.212881	0.351065	insig	-0.0319295	0.917914	insig	0.00460744	0.99123	insig	0.239687	0.210446	insig	0.248441	0.458749	insig	-0.595407	0.000357767	insig	-0.686631	0.000130797	insig	-1.01048	0.00072524	up	-0.934343	4.95237e-05	insig
0.365018	0.387202	insig	0.507097	0.397512	insig	0.827472	0.067206	insig	0.121323	0.964645	insig	-0.293562	0.952937	insig	-0.437028	0.47397	insig	PB.33	-0.0421488	0.985557	insig	-0.23978	0.570802	insig	-0.568616	0.0935844	insig	-0.194012	0.726691	insig	0.323319	0.330298	insig	0.530218	0.241506	insig	-1.02145	0.000250415	up	-0.609553	0.138048	insig	-0.315759	0.543849	insig	0.346409	0.505469	insig
0.678009	0.185931	insig	0.767195	0.251382	insig	0.351522	0.566451	insig	0.0686506	0.974877	insig	0.444492	0.80717	insig	0.353359	0.44667	insig	PB.34	-0.260619	0.852095	insig	0.385751	0.330354	insig	0.085799	0.856198	insig	0.65197	0.198753	insig	0.295371	0.442255	insig	-0.34293	0.629686	insig	-1.16239	0.00435252	up	-0.21477	0.650242	insig	-0.819875	0.0295421	insig	-0.92463	0.00771475	insig
-1.21839	0.558327	insig	-0.883469	0.741705	insig	-0.517001	0.813085	insig	0.3143	0.987501	insig	-0.339875	0.993405	insig	-0.670498	0.865224	insig	PB.35	0.59397	0.909933	insig	-1.49889	0.149263	insig	-2.10206	0.278393	insig	-2.08187	0.17449	insig	0.600126	0.807598	insig	2.68775	0.317501	insig	-2.15538	0.00874287	up	-3.96602	0.0133846	up	-1.57901	0.372988	insig	-0.587079	0.855067	insig
-1.03239	9.73702e-06	down	-0.763087	0.154372	insig	-0.834002	0.000102657	insig	0.248616	0.906414	insig	0.0979928	0.99114	insig	-0.171395	0.550153	insig	PB.37	-0.264579	0.810495	insig	-0.315928	0.0938509	insig	-0.452939	0.0131476	insig	-0.04455	0.947848	insig	0.132088	0.495207	insig	0.188764	0.753333	insig	1.36341	7.34731e-14	down	0.600669	0.0662553	insig	0.874918	0.0542685	insig	0.949915	5.54962e-08	insig
0.0593779	0.901381	insig	-0.203038	0.763214	insig	0.0425604	0.936479	insig	-0.283932	0.881133	insig	-0.217336	0.964129	insig	0.0456686	0.942767	insig	PB.39	-0.277659	0.84914	insig	-0.0184787	0.975517	insig	-0.207134	0.661766	insig	0.266095	0.717659	insig	0.183799	0.700786	insig	-0.0688075	0.948639	insig	-0.805913	0.0046621	insig	-0.462503	0.295887	insig	-1.03193	0.0184967	up	-0.587145	0.136804	insig
1.40505	0.0133608	up	2.46024	0.00353913	up	1.40374	0.0401433	up	1.03351	0.656885	insig	1.09004	0.707463	insig	0.0371568	0.974708	insig	PB.40	-0.294781	0.901643	insig	0.0951481	0.88412	insig	0.104194	0.87161	insig	0.395234	0.53831	insig	-0.0131609	0.975952	insig	-0.395378	0.57505	insig	-2.97279	4.89866e-12	up	-1.26792	0.0167983	up	-0.651345	0.395434	insig	-1.70862	0.00521897	up
-1.20692	0.000196881	down	-1.509	0.00547531	down	-0.730945	0.0575104	insig	-0.321725	0.899633	insig	-0.74879	0.707463	insig	-0.451112	0.401236	insig	PB.41	0.231728	0.890697	insig	0.386167	0.309856	insig	0.188799	0.695935	insig	0.159338	0.792802	insig	0.192305	0.597134	insig	0.0455044	0.962395	insig	3.03511	8.0311e-38	down	1.60233	3.21789e-05	down	1.10238	0.0340223	down	2.08628	3.92424e-07	down
-0.552845	0.0570782	insig	-1.23666	0.0510938	insig	-1.18391	0.00060105	down	-0.702644	0.681212	insig	-0.0215811	0.996634	insig	0.656152	0.0767672	insig	PB.42	-0.308933	0.443008	insig	-0.247725	0.253073	insig	-0.661304	0.000744872	insig	0.0669191	0.873295	insig	0.408729	0.0593438	insig	0.354669	0.373444	insig	0.758127	0.000722903	insig	0.519878	0.0536412	insig	-0.267084	0.689858	insig	0.206679	0.628755	insig
-0.609023	0.0577711	insig	-1.11692	0.0422723	down	-0.626881	0.0477894	insig	-0.528341	0.768108	insig	-0.459782	0.864503	insig	0.0459095	0.941882	insig	PB.43	0.562991	0.724766	insig	-0.64243	0.420936	insig	-0.260435	0.764561	insig	-1.20135	0.1621	insig	-0.387269	0.653756	insig	0.825415	0.439065	insig	3.64131	2.28531e-36	down	2.47396	1.90492e-11	down	3.12924	3.22768e-08	down	3.2437	8.75624e-19	down
-0.794051	0.0114874	insig	-1.49317	0.0302713	down	-1.67834	2.19114e-06	down	-0.717972	0.729505	insig	0.213125	0.980483	insig	0.907405	0.0237792	insig	PB.44	0.66784	0.281684	insig	0.247401	0.662703	insig	-0.782078	0.0402952	insig	-0.41331	0.571645	insig	1.02428	0.0232665	up	1.4516	0.00177429	up	2.01983	1.23852e-14	down	0.562344	0.123368	insig	0.240759	0.770757	insig	1.09415	0.0127796	down
2.34795	0.00242186	up	4.81627	0.000218858	up	5.04187	8.83774e-13	up	2.44302	0.425427	insig	-0.197381	0.993405	insig	-2.65247	0.0017823	down	PB.48	1.08292	0.253609	insig	0.995172	0.00577508	insig	1.5604	0.000394427	up	-0.0842716	0.94034	insig	-0.569506	0.130987	insig	-0.469812	0.610202	insig	-3.43955	1.28782e-12	up	-2.16306	0.00286403	up	0.337301	0.819297	insig	0.00816245	0.993252	insig
0.623685	0.195506	insig	1.13763	0.236602	insig	0.0798546	0.886683	insig	0.492338	0.899121	insig	1.09067	0.680526	insig	0.577917	0.26392	insig	PB.49	0.259468	0.813386	insig	0.251689	0.338602	insig	0.826512	6.17452e-05	insig	-0.00330509	0.9965	insig	-0.579903	0.00270873	insig	-0.563208	0.231507	insig	-1.50795	3.45527e-07	up	-1.13854	0.011837	up	-0.665504	0.42659	insig	-2.2875	3.51403e-20	up
0.122674	0.713928	insig	0.14413	0.751553	insig	0.326426	0.320673	insig	5.3154e-05	0.999905	insig	-0.154857	0.955822	insig	-0.175996	0.606326	insig	PB.51	-0.247329	0.693892	insig	0.0915337	0.739873	insig	-0.328634	0.0735442	insig	0.345155	0.302533	insig	0.41524	0.0325023	insig	0.0829124	0.877729	insig	-1.22528	2.68039e-09	up	-0.848406	0.000486957	insig	-1.21253	1.48803e-07	up	-0.599483	0.0168398	insig
0.292153	0.506707	insig	-0.033949	0.969473	insig	-0.599037	0.229922	insig	-0.346632	0.743058	insig	0.593245	0.688789	insig	0.919337	0.00415877	insig	PB.52	-0.14031	0.964814	insig	-1.07296	0.0435185	down	-0.146312	0.841114	insig	-0.926331	0.102209	insig	-0.930596	0.033617	insig	0.00748332	0.99389	insig	1.07642	0.0130701	down	1.51622	2.02442e-09	down	2.07431	2.01624e-07	down	0.592552	0.128764	insig
0.30229	0.27237	insig	0.763557	0.0359426	insig	0.292645	0.485339	insig	0.441006	0.628531	insig	0.500881	0.772376	insig	0.0392455	0.953122	insig	PB.56	0.104404	0.950586	insig	-0.497886	0.168782	insig	0.526476	0.0176979	insig	-0.59866	0.256314	insig	-1.02924	0.00121531	down	-0.418331	0.330129	insig	0.889116	3.2008e-05	insig	1.09211	0.000115546	down	2.11011	4.42444e-09	down	0.621576	0.110717	insig
1.1862	0.725874	insig	0.848101	NA	insig	1.48688	0.56176	insig	-0.355308	0.977437	insig	-0.603821	0.957082	insig	-0.270331	0.931572	insig	PB.57	0.217357	0.988993	insig	-1.00288	0.723092	insig	0.184902	0.958255	insig	-1.21537	0.0208	down	-1.19285	0.00737628	down	0.0339199	0.951844	insig	-0.951925	0.717436	insig	0.0125798	0.996691	insig	0.852153	0.563961	insig	0.311759	0.251109	insig
0.30067	0.160429	insig	0.0923413	0.939205	insig	-0.646344	0.0115683	insig	-0.227019	0.952538	insig	0.77343	0.821309	insig	0.974634	6.69729e-05	insig	PB.59	-0.236146	0.604205	insig	-0.0406053	0.898423	insig	0.132135	0.648245	insig	0.200832	0.57137	insig	-0.177709	0.530769	insig	-0.36574	0.348689	insig	-1.15594	3.39953e-14	up	-0.613523	0.00298486	insig	-1.06094	0.18322	insig	-1.9648	4.39346e-12	up
-0.682366	0.00839001	insig	-0.768876	0.0667004	insig	-0.672763	0.0342181	insig	-0.106536	0.946644	insig	-0.0674218	0.992886	insig	0.0164064	0.973805	insig	PB.60	0.516247	0.413049	insig	-0.0588369	0.901638	insig	-0.517461	0.174173	insig	-0.567615	0.094825	insig	0.454277	0.137042	insig	1.03356	0.0101501	up	1.53156	1.99934e-09	down	0.338412	0.211391	insig	0.78061	0.0239848	insig	1.34752	5.60865e-05	down
0.392298	0.162745	insig	1.12163	0.0684024	insig	0.637905	0.0776145	insig	0.70765	0.659914	insig	0.508483	0.866463	insig	-0.218243	0.625849	insig	PB.65	0.565234	0.131066	insig	0.566165	0.0606999	insig	0.6263	0.102833	insig	0.00656494	0.991803	insig	-0.0646512	0.893236	insig	-0.0570283	0.939958	insig	-2.80751	1.59214e-38	up	-2.97294	1.21718e-46	up	-2.29323	7.56046e-06	up	-2.82874	1.58731e-12	up
-0.308699	0.766856	insig	4.24367	0.00161262	up	2.47565	0.13805	insig	4.53108	0.00339003	up	1.79145	0.733508	insig	-2.75211	0.0121277	down	PB.66	0.860998	0.771111	insig	-1.38618	0.407601	insig	0.847569	0.438505	insig	-2.23594	0.0217613	down	-2.23653	0.00469821	down	0.00940932	0.993116	insig	-2.68614	0.000964535	up	-3.85216	8.68535e-19	up	2.89956	0.0230093	down	-1.09874	0.391202	insig
2.8005	6.63951e-06	up	5.31329	0.000321737	up	2.89165	3.90399e-05	up	2.48475	0.538098	insig	2.44853	0.5727	insig	-0.0485184	0.975883	insig	PB.67	0.951003	0.30777	insig	1.846	1.16697e-09	up	1.39805	7.5221e-05	up	0.898756	0.139963	insig	0.443687	0.123639	insig	-0.441843	0.567915	insig	-2.96197	1.65381e-16	up	-1.10545	0.158142	insig	0.455712	0.795643	insig	-1.50277	0.0701029	insig
0.125963	0.653686	insig	-0.532709	0.695829	insig	-1.01973	0.00228514	down	-0.678184	0.880933	insig	0.520419	0.955822	insig	1.17299	0.000928271	up	PB.68	0.439512	0.752573	insig	1.40425	6.45683e-13	up	0.808479	0.0107745	insig	0.968405	0.0428954	insig	0.590758	0.0183579	insig	-0.3627	0.653837	insig	1.19266	3.3596e-09	down	0.885241	0.0283996	insig	-0.784473	0.47909	insig	-0.6642	0.126406	insig
0.11712	0.831122	insig	1.17013	0.29793	insig	1.34086	0.0242516	up	1.03106	0.731442	insig	-0.153246	0.993405	insig	-1.20195	0.0472719	down	PB.69	-0.115618	0.934447	insig	-0.424149	0.0583159	insig	-0.919759	7.24116e-06	insig	-0.302481	0.508883	insig	0.490648	0.0700131	insig	0.805605	0.0349919	insig	-2.08736	5.14603e-11	up	-1.8489	6.85954e-08	up	-0.53209	0.610364	insig	0.143983	0.841946	insig
2.05227	5.76866e-05	up	2.68544	0.0618197	insig	1.53242	0.000835947	up	0.608678	0.923908	insig	1.18318	0.847941	insig	0.554951	0.345756	insig	PB.71	0.504206	0.817032	insig	-0.0430625	0.963843	insig	1.97007	4.52865e-05	up	-0.547549	0.527044	insig	-2.01954	2.04596e-07	down	-1.45973	0.00359349	down	-1.65051	0.000572519	up	-0.0948309	0.891968	insig	1.03731	0.473296	insig	-2.11632	2.96377e-17	up
0.504978	0.0912343	insig	0.709811	0.196069	insig	-0.0464026	0.890725	insig	0.183276	0.941685	insig	0.789044	0.567974	insig	0.584282	0.0931378	insig	PB.72	0.120775	0.959462	insig	0.334291	0.451129	insig	0.329985	0.51482	insig	0.219678	0.670673	insig	2.01675e-05	0.999936	insig	-0.207366	0.759362	insig	1.01028	0.00021972	down	1.40122	1.62456e-05	down	1.3446	0.00366765	down	0.6032	0.0345525	insig
0.17804	0.772666	insig	-0.194715	0.902093	insig	-0.799265	0.116914	insig	-0.393382	0.935646	insig	0.631571	0.932074	insig	1.00504	0.0201976	up	PB.73	1.86841	0.0169941	up	-0.514943	0.519777	insig	0.5043	0.58387	insig	-2.37356	0.000899459	down	-1.02298	0.190493	insig	1.35941	0.168843	insig	0.572665	0.248823	insig	-1.11232	0.0556886	insig	0.855319	0.460775	insig	-0.759507	0.229741	insig
0.599311	0.16403	insig	1.31539	0.264079	insig	0.208639	0.739794	insig	0.695781	0.86546	insig	1.13222	0.75838	insig	0.417354	0.374784	insig	PB.74	1.651	0.017213	up	-0.68381	0.462579	insig	0.162525	0.895797	insig	-2.32723	0.00330286	down	-0.850181	0.428761	insig	1.48474	0.160827	insig	1.04041	0.0276619	down	-0.00652505	0.990889	insig	3.00164	0.00310363	down	1.0592	0.155997	insig
-0.28345	0.43479	insig	0.84824	NA	insig	-3.32961	3.62037e-10	down	1.11015	NA	insig	4.19992	NA	insig	3.07039	2.2913e-08	up	PB.76	-0.145255	0.976032	insig	0.707184	0.316485	insig	0.908851	0.232944	insig	0.864079	0.493771	insig	-0.206008	0.824877	insig	-1.06099	0.383939	insig	2.1121	1.90835e-09	down	1.97842	0.000828957	down	2.21245	NA	insig	-2.15009	0.00854562	up
-0.463446	0.471021	insig	-0.969196	0.340167	insig	-0.142981	0.835755	insig	-0.525868	0.890031	insig	-0.795698	0.828038	insig	-0.294003	0.701266	insig	PB.77	-0.490418	0.672023	insig	0.36667	0.591391	insig	-0.531022	0.142413	insig	0.862273	0.311051	insig	0.892573	0.110837	insig	0.0461582	0.960304	insig	-3.67587	1.04829e-29	up	-3.64351	1.16858e-15	up	-5.05431	9.81288e-14	up	-3.32052	1.51618e-25	up
0.39545	0.378113	insig	-0.713257	0.488015	insig	-0.533407	0.284716	insig	-1.1269	0.659387	insig	-0.140837	0.992998	insig	0.95704	0.0922881	insig	PB.78	0.34653	0.932185	insig	1.53688	0.197548	insig	0.423514	0.685582	insig	1.19454	0.0933512	insig	1.10669	0.0553779	insig	-0.0734991	0.912578	insig	3.52322	2.54777e-11	down	3.57464	2.47541e-20	down	1.23454	0.187475	insig	2.53675	1.00552e-07	down
0.289252	0.454214	insig	0.83291	0.0428792	insig	0.557721	0.127363	insig	0.523645	0.425427	insig	0.304466	0.86742	insig	-0.241335	0.524731	insig	PB.79	-0.183033	0.853012	insig	-0.104653	0.793492	insig	0.108206	0.733209	insig	0.0827515	0.889525	insig	-0.218036	0.483772	insig	-0.288466	0.530914	insig	-2.27644	4.64742e-21	up	-1.79912	1.30934e-11	up	-1.37873	2.74005e-06	up	-1.85851	7.43573e-14	up
0.360413	0.202426	insig	0.135738	0.822636	insig	0.0397878	0.907224	insig	-0.244704	0.895129	insig	0.12479	0.980857	insig	0.34639	0.188273	insig	PB.80	0.136419	0.940513	insig	0.155528	0.736827	insig	-0.94307	0.00707495	insig	0.0258529	0.965261	insig	1.09412	3.21074e-05	up	1.08117	0.00145114	up	-1.33148	2.66515e-07	up	-1.1003	1.42198e-05	up	-1.39374	0.000241398	up	-0.377531	0.131066	insig
0.481942	0.23356	insig	-1.04747	0.00641005	down	0.483879	0.352475	insig	-1.54888	0.0322773	down	-1.50094	0.0805627	insig	0.0211652	0.981849	insig	PB.82	0.275853	0.785536	insig	0.447112	0.0570813	insig	-0.976092	0.00645904	insig	0.177784	0.730078	insig	1.41806	1.22695e-05	up	1.25435	0.00644491	up	-1.87098	6.53577e-20	up	-1.65821	7.78998e-05	up	-3.40408	1.46201e-29	up	-0.438795	0.497175	insig
-0.647795	0.217936	insig	-0.902808	0.198756	insig	-0.704254	0.245119	insig	-0.277597	0.820728	insig	-0.16905	0.97172	insig	0.0895392	0.885561	insig	PB.83	-0.249153	0.918999	insig	0.084623	0.920445	insig	0.377371	0.463615	insig	0.341235	0.73818	insig	-0.297112	0.630513	insig	-0.626303	0.360103	insig	1.63668	0.000445479	down	1.24511	0.000937385	down	0.607819	0.252968	insig	0.520283	0.225078	insig
0.170077	0.759941	insig	1.11495	0.198116	insig	0.78322	0.195755	insig	0.923971	0.677928	insig	0.360098	0.966064	insig	-0.582145	0.419537	insig	PB.85	0.0726782	0.976009	insig	-0.283902	0.529427	insig	0.341552	0.392798	insig	-0.350851	0.547021	insig	-0.630067	0.050556	insig	-0.266045	0.682786	insig	-1.11343	0.000783049	up	-1.01023	0.0179883	up	0.239778	0.778725	insig	-0.706107	0.253092	insig
0.752497	0.44581	insig	1.52809	0.247185	insig	0.523697	0.635931	insig	0.754366	0.846994	insig	1.03729	0.819598	insig	0.259938	0.823735	insig	PB.86	-0.233206	0.922856	insig	0.152381	0.747996	insig	0.124654	0.796686	insig	0.390628	0.603993	insig	0.0230289	0.957648	insig	-0.35364	0.706924	insig	-3.64305	5.56356e-15	up	-2.65267	1.1088e-05	up	-2.31378	0.0021225	up	-3.27353	2.919e-11	up
0.390762	0.203242	insig	1.27585	0.0051364	up	1.30704	1.12846e-08	up	0.864628	0.33095	insig	-0.00353236	0.998611	insig	-0.890955	0.000122436	insig	PB.87	-0.3869	0.745363	insig	0.113318	0.849649	insig	0.238844	0.676185	insig	0.503474	0.360982	insig	-0.130638	0.803395	insig	-0.620235	0.287263	insig	-0.0263089	0.937983	insig	0.758772	0.017264	insig	1.09569	0.0144003	down	1.01198	0.00208857	down
-0.166507	0.752655	insig	0.0474363	0.94858	insig	-0.175943	0.73945	insig	0.193705	0.909995	insig	0.252841	0.943073	insig	0.0367174	0.956652	insig	PB.89	0.372889	0.901587	insig	-0.113307	0.896218	insig	0.967355	0.0809527	insig	-0.481811	0.612195	insig	-1.08505	0.00946115	down	-0.590328	0.549304	insig	0.582349	0.192305	insig	0.0503129	0.942539	insig	0.703135	0.103351	insig	-0.589838	0.116045	insig
-0.739923	0.0251043	insig	-0.458189	0.584922	insig	-0.401118	0.124412	insig	0.262226	0.936803	insig	-0.0324371	0.994765	insig	-0.316381	0.486059	insig	PB.90	0.252396	0.663354	insig	0.444507	0.0946586	insig	-0.352235	0.302129	insig	0.198714	0.68846	insig	0.792018	0.0152179	insig	0.605375	0.212962	insig	1.05269	1.72839e-09	down	0.0656653	0.890046	insig	0.110704	0.893299	insig	0.975211	0.00191841	insig
1.02898	0.0144371	up	1.70841	0.00262247	up	2.53141	2.65149e-12	up	0.658572	0.625852	insig	-0.794148	0.538841	insig	-1.47364	7.01831e-06	down	PB.91	0.461591	0.810495	insig	0.828736	0.071075	insig	0.979504	0.0422099	insig	0.369516	0.629982	insig	-0.156363	0.724506	insig	-0.513383	0.515212	insig	0.23386	0.623587	insig	0.806683	0.0766179	insig	1.07242	0.0194271	down	1.75456	2.13111e-08	down
0.716454	0.0333609	insig	1.26253	0.0381799	up	0.492312	0.27637	insig	0.525114	0.773475	insig	0.800992	0.67394	insig	0.254806	0.615151	insig	PB.92	0.308423	0.569704	insig	0.152537	0.561523	insig	0.397767	0.104447	insig	-0.150911	0.560531	insig	-0.250511	0.162071	insig	-0.0873408	0.84923	insig	-1.98295	3.00724e-14	up	-1.57018	2.7314e-10	up	-0.916329	0.0669329	insig	-1.92124	1.1568e-07	up
1.25897	0.00371719	up	1.48602	0.289393	insig	-0.147996	0.759661	insig	0.204294	0.976551	insig	1.6675	0.660585	insig	1.44044	0.00474333	up	PB.93	0.182818	0.931976	insig	0.101798	0.865782	insig	0.62775	0.0396769	insig	-0.0787201	0.935529	insig	-0.531475	0.166946	insig	-0.440099	0.409165	insig	-1.27986	2.01502e-06	up	-0.197078	0.746979	insig	0.0648189	0.966266	insig	-2.08266	9.07647e-10	up
-0.246887	0.327792	insig	0.126244	0.827772	insig	0.233674	0.37729	insig	0.351584	0.792806	insig	-0.0809392	0.991271	insig	-0.452783	0.0389047	insig	PB.96	-0.0375073	0.989546	insig	-0.295306	0.444486	insig	-0.299942	0.455295	insig	-0.251932	0.709371	insig	-0.00076732	0.998445	insig	0.262303	0.731709	insig	0.579201	0.0162459	insig	0.375268	0.317656	insig	0.960047	0.0153686	insig	1.0831	4.69006e-06	down
1.39036	0.0119136	up	2.01457	0.0291255	up	3.00801	9.58057e-11	up	0.603301	0.837748	insig	-0.964876	0.686885	insig	-1.58538	4.2354e-06	down	PB.98	2.48164	0.251406	insig	-0.244188	0.917953	insig	2.34236	0.0736137	insig	-2.71402	0.0279173	down	-2.59127	0.00213381	down	0.134779	0.941087	insig	2.24528	0.0157242	down	1.15972	0.0896479	insig	4.46492	1.08403e-07	down	2.87686	5.7605e-19	down
-0.652117	0.040652	insig	-1.41337	0.00789665	down	-1.42455	2.72867e-07	down	-0.780515	0.522818	insig	0.0418168	0.993405	insig	0.799199	0.00243221	insig	PB.99	1.13898	0.0845287	insig	0.466299	0.546054	insig	-0.34324	0.521386	insig	-0.665303	0.50073	insig	0.803932	0.202324	insig	1.48295	5.65775e-05	up	0.425698	0.241547	insig	-1.36282	6.66705e-05	up	-1.49471	0.0281569	up	-0.689999	0.00126635	insig
1.23237	0.00018134	up	1.25246	0.00409765	up	1.1562	0.0023069	up	-3.42099e-05	0.999905	insig	0.12528	0.982605	insig	0.104534	0.850307	insig	PB.100	-0.0398572	0.986444	insig	0.0240167	0.967274	insig	0.0573463	0.906304	insig	0.0691948	0.919711	insig	-0.03785	0.927868	insig	-0.0945733	0.889768	insig	-0.420559	0.203449	insig	0.857002	0.00429227	insig	0.766411	0.0300651	insig	0.644977	0.0813705	insig
0.0724723	0.828845	insig	-0.140298	0.817258	insig	-0.280872	0.293857	insig	-0.234218	0.899633	insig	0.170934	0.968817	insig	0.383417	0.145459	insig	PB.101	0.0032923	0.998971	insig	0.395158	0.0287039	insig	-0.210882	0.353264	insig	0.397585	0.0999228	insig	0.601228	0.000732448	insig	0.217305	0.578684	insig	-1.20108	2.13332e-10	up	-1.12543	1.36685e-06	up	-1.77837	5.32993e-07	up	-1.30168	2.93863e-11	up
-0.644691	0.0701317	insig	-0.574903	0.279539	insig	0.127764	0.793795	insig	0.0501627	0.975774	insig	-0.671067	0.348049	insig	-0.745557	0.00146451	insig	PB.102	0.664891	0.0800254	insig	-0.0805571	0.830188	insig	-0.0863458	0.82651	insig	-0.740602	4.86672e-05	insig	0.000371036	0.998552	insig	0.753258	0.00992307	insig	1.97277	2.11969e-10	down	0.668026	0.00276079	insig	1.4389	6.67697e-08	down	2.15584	2.49369e-20	down
0.51455	0.406009	insig	1.20903	0.20339	insig	1.43627	0.00152239	up	0.670761	0.832978	insig	-0.200715	0.984675	insig	-0.888231	0.0864668	insig	PB.103	0.848108	0.655168	insig	0.720294	0.238686	insig	0.574883	0.44931	insig	-0.123356	0.939125	insig	0.141403	0.858718	insig	0.278379	0.84923	insig	-1.53784	0.000914531	up	-1.86614	0.00635164	up	-1.09782	0.17147	insig	-0.706716	0.189808	insig
0.0025882	0.994474	insig	-0.221175	0.570064	insig	-0.467581	0.168377	insig	-0.24514	0.824219	insig	0.272512	0.929376	insig	0.497359	0.184506	insig	PB.104	-0.252143	0.813386	insig	-0.186496	0.606487	insig	-0.00224003	0.995362	insig	0.0718039	0.908098	insig	-0.188989	0.508971	insig	-0.248829	0.632112	insig	0.877185	6.11077e-06	insig	1.13812	5.43116e-06	down	0.802476	0.0102571	insig	0.382078	0.322484	insig
0.0597875	0.847872	insig	0.0717465	0.940052	insig	-0.0578159	0.903456	insig	-0.00864158	0.998481	insig	0.155311	0.986111	insig	0.141977	0.798801	insig	PB.106	-0.24191	0.890697	insig	-0.773239	0.041	insig	0.321764	0.472048	insig	-0.527229	0.200829	insig	-1.10072	2.90714e-05	down	-0.561653	0.0849796	insig	0.545505	0.049054	insig	0.852459	0.00150779	insig	1.35326	0.0286349	down	0.137801	0.758732	insig
-2.38801	1.11739e-07	down	-1.35255	0.0223499	down	-0.606074	0.277141	insig	1.01556	0.34441	insig	-0.713117	0.652111	insig	-1.75506	0.000241051	down	PB.109	-1.06214	0.0441485	down	-0.911641	0.0279374	insig	-1.72145	1.41116e-05	down	0.154745	0.88391	insig	0.804539	0.145969	insig	0.661583	0.5542	insig	3.02824	5.75394e-16	down	1.70862	0.000986519	down	2.54759	1.92661e-10	down	4.11325	9.37363e-20	down
2.62953	0.00151101	up	3.23396	0.00824817	up	2.45089	0.00407732	up	0.586174	0.895665	insig	0.820351	0.869167	insig	0.21401	0.836108	insig	PB.110	0.105177	0.976009	insig	0.0219202	0.978369	insig	1.02532	0.0169915	up	-0.0798791	0.94898	insig	-1.00807	0.017921	down	-0.916233	0.229867	insig	-3.25478	3.0482e-07	up	-0.726461	0.311775	insig	-0.0836609	0.940906	insig	-1.86389	0.00043582	up
0.0719024	0.860573	insig	-0.387367	0.703257	insig	-0.292867	0.399176	insig	-0.478132	0.88883	insig	-0.0585863	0.993405	insig	0.392852	0.322256	insig	PB.111	0.153084	0.89323	insig	0.256303	0.367453	insig	0.631483	0.0062447	insig	0.107805	0.790111	insig	-0.380516	0.0702624	insig	-0.475294	0.108543	insig	-0.303694	0.227952	insig	-0.380124	0.252737	insig	-0.986995	0.195093	insig	-1.25935	2.98332e-06	up
0.726647	0.190899	insig	0.377809	0.669097	insig	0.254535	0.717867	insig	-0.370376	0.786558	insig	0.150596	0.976311	insig	0.500309	0.177254	insig	PB.112	-0.00400287	0.998971	insig	0.00171939	0.99825	insig	0.267267	0.494	insig	0.0107976	0.989755	insig	-0.270328	0.418303	insig	-0.268491	0.723468	insig	-1.06938	0.0201021	up	-0.332269	0.433712	insig	-0.734259	0.0459571	insig	-1.11163	0.000136103	up
-0.371559	0.224071	insig	-0.0248364	0.966282	insig	-0.112069	0.803128	insig	0.325822	0.660158	insig	0.116324	0.97978	insig	-0.230093	0.569715	insig	PB.114	-0.108881	0.948286	insig	0.339617	0.183179	insig	-0.0491361	0.895267	insig	0.453618	0.175529	insig	0.384025	0.02372	insig	-0.0561662	0.933697	insig	-0.639076	0.0123469	insig	-0.895367	0.00139111	insig	-1.04409	1.5273e-06	up	-0.73434	0.0189048	insig
-0.505021	0.0465974	insig	0.126734	0.901093	insig	-0.501662	0.0547943	insig	0.610953	0.80395	insig	0.654457	0.819898	insig	0.0240453	0.950471	insig	PB.117	0.0344934	0.988606	insig	-0.595174	0.0100146	insig	-0.0144183	0.970952	insig	-0.623068	0.125114	insig	-0.585571	0.0170212	insig	0.048255	0.95171	insig	1.77746	6.38969e-17	down	1.2428	2.47449e-05	down	2.46025	6.58941e-05	down	1.25822	2.36838e-08	down
-0.187135	0.522908	insig	-0.852948	0.091635	insig	-0.711135	0.0342034	insig	-0.684495	0.542918	insig	-0.108794	0.989854	insig	0.550211	0.113121	insig	PB.120	0.111781	0.908378	insig	-0.0402938	0.919196	insig	-0.338674	0.287994	insig	-0.14588	0.775841	insig	0.293607	0.407133	insig	0.45431	0.333544	insig	-0.537204	0.00732003	insig	-0.830463	0.000402958	insig	-1.38839	0.00137356	up	-0.940151	0.0161181	insig
0.232582	0.34099	insig	0.819268	0.0293289	insig	0.377207	0.351048	insig	0.566303	0.448101	insig	0.472081	0.80717	insig	-0.114947	0.836013	insig	PB.123	0.193332	0.85696	insig	-0.361705	0.453614	insig	0.517547	0.0502644	insig	-0.551457	0.380253	insig	-0.884125	0.0333054	insig	-0.321692	0.460921	insig	0.535356	0.011483	insig	0.58019	0.0137426	insig	1.67589	0.000127489	down	0.362038	0.40543	insig
-0.725879	0.00343589	insig	-1.08883	0.0358301	down	-1.4152	1.5208e-07	down	-0.383039	0.842324	insig	0.354995	0.915845	insig	0.715241	0.0231261	insig	PB.124	-0.0659568	0.976133	insig	0.0998794	0.83771	insig	-0.604879	0.00117318	insig	0.173738	0.831253	insig	0.699984	0.0406127	insig	0.538522	0.315576	insig	0.269812	0.167168	insig	-0.384165	0.321116	insig	-0.957463	0.0687768	insig	-0.569158	0.0776658	insig
2.03832	0.00549613	up	3.29796	0.0013475	up	1.64243	0.0192884	up	1.23194	0.716928	insig	1.68432	0.527509	insig	0.437703	0.697342	insig	PB.125	-0.352507	0.875617	insig	0.186896	0.780272	insig	0.358827	0.525046	insig	0.543745	0.44737	insig	-0.176014	0.692344	insig	-0.706716	0.269144	insig	-3.20977	2.12645e-12	up	-0.809082	0.315559	insig	-0.143725	0.901178	insig	-1.95745	0.000593941	up
0.378336	0.19636	insig	0.974472	0.00752382	insig	0.123885	0.787874	insig	0.575933	0.216786	insig	0.879947	0.180407	insig	0.283134	0.472607	insig	PB.126	0.232184	0.922807	insig	-0.123937	0.851579	insig	0.42782	0.217561	insig	-0.35316	0.716047	insig	-0.556795	0.24645	insig	-0.19085	0.852544	insig	3.54763	8.86516e-47	down	3.69861	1.22929e-30	down	4.60666	1.2257e-40	down	3.21101	7.0801e-24	down
-1.12804	0.000380204	down	-1.45817	0.00333993	down	-0.750857	0.0332252	insig	-0.351633	0.812112	insig	-0.678749	0.552734	insig	-0.348306	0.224419	insig	PB.128	0.468928	0.680805	insig	0.14782	0.794622	insig	-0.126923	0.84368	insig	-0.316154	0.518473	insig	0.268949	0.479603	insig	0.59678	0.286753	insig	2.92602	4.26428e-19	down	1.33316	1.54673e-07	down	1.27924	0.00132041	down	2.27017	5.04543e-16	down
0.670319	0.000398287	insig	0.813045	0.175479	insig	0.560324	0.0193383	insig	0.121749	0.964913	insig	0.282428	0.952616	insig	0.137837	0.661802	insig	PB.129	0.247431	0.84914	insig	0.806886	0.205786	insig	1.08757	4.39262e-07	up	0.564805	0.599222	insig	-0.285707	0.704587	insig	-0.835635	0.035597	insig	-1.49784	5.74443e-15	up	-1.06854	0.000165126	up	-1.53558	0.0346827	up	-2.0539	9.33881e-20	up
1.28435	0.0110448	up	1.79148	0.018199	up	1.30947	0.0131668	up	0.485379	0.82235	insig	0.508498	0.864503	insig	0.00260556	0.996888	insig	PB.131	0.286405	0.745363	insig	0.593082	0.038938	insig	0.402894	0.180117	insig	0.313573	0.460692	insig	0.185641	0.525698	insig	-0.114693	0.844795	insig	-2.47107	7.30238e-10	up	-1.46804	7.16161e-07	up	-1.3189	0.0101759	up	-1.59609	2.93647e-08	up
-0.180536	0.746747	insig	0.769709	0.370282	insig	0.738679	0.270277	insig	0.927083	0.645383	insig	0.0588803	0.993405	insig	-0.885704	0.217171	insig	PB.132	-0.43466	0.942706	insig	-0.281899	0.838415	insig	-1.01023	0.339052	insig	0.157824	0.947123	insig	0.723973	0.393885	insig	0.584876	0.745923	insig	0.260344	0.711511	insig	0.520754	0.588683	insig	1.26413	0.134138	insig	1.97334	0.00347674	down
-0.660781	0.0314632	insig	-1.07448	0.00152795	down	-0.632996	0.172906	insig	-0.433791	0.691127	insig	-0.413445	0.886032	insig	-0.00475762	0.99538	insig	PB.133	-0.407403	0.360582	insig	-0.194734	0.487031	insig	-0.151869	0.563331	insig	0.218379	0.563123	insig	-0.0479588	0.85637	insig	-0.253716	0.515437	insig	0.208719	0.357987	insig	-0.0374393	0.928777	insig	-0.709651	0.0140365	insig	-0.29739	0.589971	insig
-0.937582	0.000102242	insig	-1.64524	2.34484e-06	down	-1.47942	4.2234e-05	down	-0.726921	0.372823	insig	-0.136867	0.984675	insig	0.565065	0.240808	insig	PB.135	-0.284792	0.816936	insig	-0.212905	0.520744	insig	-0.588587	0.0386296	insig	0.0782448	0.915762	insig	0.370648	0.200092	insig	0.305076	0.673421	insig	1.91095	4.6006e-26	down	1.26378	0.000158688	down	0.440075	0.267538	insig	0.993102	0.0346963	insig
-0.168182	0.474638	insig	-0.825446	0.271013	insig	-1.2267	0.000163398	down	-0.675769	0.755463	insig	0.435904	0.931804	insig	1.08443	0.00231231	up	PB.136	-0.0155211	0.997902	insig	-0.153185	0.792917	insig	0.107367	0.867749	insig	-0.131372	0.861928	insig	-0.266173	0.446379	insig	-0.121578	0.878039	insig	-0.538946	0.0872984	insig	-0.686403	0.0514231	insig	-1.24801	0.0542079	insig	-1.90171	3.62732e-06	up
0.457939	0.122773	insig	0.472784	0.339451	insig	-0.189212	0.546277	insig	-0.00730306	0.998263	insig	0.692303	0.565657	insig	0.678046	0.0462309	insig	PB.138	0.15199	0.940306	insig	-0.116558	0.817384	insig	0.550302	0.165886	insig	-0.264629	0.341218	insig	-0.672676	7.34657e-05	insig	-0.395843	0.147222	insig	-0.827118	0.0033224	insig	-0.515803	0.094654	insig	-0.278289	0.533475	insig	-1.5959	2.93622e-11	up
0.519187	0.0806253	insig	0.340486	0.478884	insig	0.051486	0.92908	insig	-0.199713	0.895129	insig	0.318486	0.916512	insig	0.497969	0.259132	insig	PB.139	-0.23194	0.831547	insig	-1.02736	0.000759962	down	-0.102913	0.783331	insig	-0.790577	0.0925093	insig	-0.929439	0.00673674	insig	-0.128278	0.852259	insig	-0.334044	0.196897	insig	0.422611	0.185277	insig	0.993388	0.0085639	insig	-0.212134	0.650445	insig
0.196869	0.399466	insig	0.565544	0.0586062	insig	0.325774	0.180124	insig	0.347156	0.677928	insig	0.268071	0.869167	insig	-0.0989493	0.790172	insig	PB.140	-0.113932	0.901587	insig	-0.245196	0.248659	insig	0.416063	0.0104749	insig	-0.126356	0.732543	insig	-0.666216	0.000154075	insig	-0.527443	0.0886784	insig	0.668388	4.30496e-06	insig	0.985364	8.68874e-06	insig	1.43949	7.59892e-09	down	0.546949	0.0155819	insig
-0.170545	0.477757	insig	-0.0281508	0.949903	insig	-0.353334	0.152807	insig	0.122709	0.917011	insig	0.354788	0.770058	insig	0.209532	0.442987	insig	PB.141	0.0446185	0.978697	insig	-0.219155	0.465659	insig	0.126827	0.705271	insig	-0.257499	0.435979	insig	-0.350594	0.103745	insig	-0.080424	0.882088	insig	1.01503	2.83318e-07	down	0.805767	0.000133043	insig	1.16533	3.52783e-06	down	0.504056	0.0284852	insig
0.368406	0.239455	insig	0.487354	0.399344	insig	0.954171	0.00176386	insig	0.0988117	0.965207	insig	-0.440179	0.830372	insig	-0.559519	0.0505112	insig	PB.143	0.311872	0.634213	insig	0.384231	0.0592525	insig	-0.550235	0.0169092	insig	0.0789746	0.855639	insig	0.929798	5.37471e-08	insig	0.863596	0.0101226	insig	-1.43658	6.44587e-10	up	-1.37502	8.69257e-08	up	-1.37393	0.000455066	up	0.0351939	0.916063	insig
-0.00411319	0.991342	insig	0.28083	0.552991	insig	0.231195	0.307956	insig	0.26479	0.851961	insig	0.0776035	0.989854	insig	-0.20866	0.387842	insig	PB.144	0.212242	0.922807	insig	0.00189494	0.99825	insig	0.772761	0.0625792	insig	-0.206378	0.795394	insig	-0.775995	0.0454821	insig	-0.557664	0.497424	insig	2.62734	2.71513e-38	down	2.41583	1.0601e-14	down	2.86645	1.03241e-17	down	2.05541	1.6883e-13	down
0.0393248	0.920804	insig	0.525458	0.460032	insig	0.0431307	0.930958	insig	0.465881	0.817533	insig	0.50964	0.852549	insig	0.0235875	0.963188	insig	PB.145	-0.0864499	0.953188	insig	-0.639788	0.0147645	insig	-0.0028786	0.992871	insig	-0.548119	0.176337	insig	-0.641879	0.020961	insig	-0.0818399	0.899361	insig	0.506291	0.0552343	insig	0.636858	0.014199	insig	1.63338	0.00177219	down	0.519126	0.0959347	insig
-0.18167	0.366148	insig	-0.112395	0.861508	insig	0.0654002	0.774508	insig	0.0484247	0.98902	insig	-0.1507	0.976471	insig	-0.219664	0.202601	insig	PB.146	-0.0770929	0.956358	insig	-0.423001	0.0421225	insig	-0.000508162	0.998494	insig	-0.339054	0.364378	insig	-0.427221	0.0312305	insig	-0.0755206	0.884547	insig	0.932942	3.53237e-10	insig	0.834234	0.000208959	insig	1.20356	0.0048572	down	0.968141	3.15111e-12	insig
3.94553	0.0342944	up	4.511	0.0180624	up	5.21718	0.180573	insig	0.543056	0.910384	insig	-0.714141	0.966923	insig	-1.27208	0.564125	insig	PB.149	0.389134	0.989668	insig	-3.14557	0.661058	insig	1.91304	0.625687	insig	-3.51863	0.697932	insig	-5.06043	0.150739	insig	-1.54209	0.761191	insig	-0.549621	0.90782	insig	2.97717	0.120747	insig	7.00796	5.08972e-05	down	2.70262	0.17144	insig
-0.103892	0.830889	insig	-0.450575	0.500469	insig	-0.159594	0.656582	insig	-0.368265	0.886601	insig	-0.256609	0.955822	insig	0.0906952	0.887615	insig	PB.150	1.10066	0.00011447	up	0.641282	0.0394182	insig	-0.260813	0.440175	insig	-0.454268	0.262095	insig	0.896831	0.00145655	insig	1.36385	1.75763e-07	up	1.22331	1.78993e-06	down	0.0236459	0.963205	insig	0.0936163	0.88856	insig	1.29177	4.93943e-10	down
0.412678	0.499834	insig	-2.81644	0.00127512	down	0.544987	0.655119	insig	-3.24947	0.000126891	down	-3.33416	0.0711874	insig	-0.110405	0.952282	insig	PB.151	-0.855079	0.712482	insig	-0.405529	0.670128	insig	-1.74008	0.0332022	down	0.45781	0.75311	insig	1.33049	0.0885309	insig	0.885534	0.626078	insig	-0.467669	0.421194	insig	0.807989	0.299792	insig	-2.91757	0.000144252	up	1.79744	0.148082	insig
0.82159	0.582611	insig	1.76634	0.24268	insig	2.84676	0.021706	up	0.923771	0.719121	insig	-1.05152	0.80717	insig	-1.99023	0.0657288	insig	PB.152	-0.0982879	0.969508	insig	-0.255575	0.71601	insig	-0.0168767	0.985336	insig	-0.149342	0.889525	insig	-0.242912	0.753105	insig	-0.0773879	0.952576	insig	-4.2558	9.71181e-09	up	-3.33694	2.18581e-08	up	-2.28231	6.14486e-05	up	-1.43602	0.168265	insig
0.461339	0.114315	insig	0.445694	0.51742	insig	-0.120068	0.75653	insig	-0.0369599	0.991633	insig	0.595584	0.779752	insig	0.609697	0.0178459	insig	PB.153	0.0522634	0.982334	insig	0.110323	0.834417	insig	0.427018	0.279509	insig	0.0628741	0.936638	insig	-0.321298	0.385201	insig	-0.372311	0.552237	insig	-0.476089	0.0920068	insig	-0.0595233	0.880368	insig	-0.182348	0.774906	insig	-1.0524	0.000137262	up
0.307113	0.367885	insig	0.501477	0.503328	insig	-0.346039	0.299783	insig	0.171797	0.952819	insig	0.874567	0.619746	insig	0.682582	0.0452841	insig	PB.154	-0.232761	0.928099	insig	0.0537177	0.939465	insig	2.7078	1.98576e-11	up	0.289268	0.754088	insig	-2.65947	2.97064e-10	down	-2.93786	2.02612e-08	down	1.12773	5.41003e-05	down	1.67338	2.91858e-05	down	1.53222	0.00961192	down	-1.95324	1.3893e-06	up
0.368536	0.44581	insig	0.417619	0.513363	insig	0.43364	0.341638	insig	0.0285941	0.992332	insig	0.0106901	0.997519	insig	-0.0393945	0.950914	insig	PB.155	0.00815903	0.998971	insig	-0.221493	0.768328	insig	0.502353	0.390678	insig	-0.224126	0.855638	insig	-0.728899	0.21783	insig	-0.489838	0.664993	insig	1.04066	0.00913957	down	1.40751	0.00357056	down	1.63901	0.000315888	down	0.941957	0.00992118	insig
-0.555031	0.0249661	insig	-0.476373	0.300602	insig	-0.375887	0.131948	insig	0.0584241	0.977239	insig	-0.0714572	0.992422	insig	-0.152205	0.584184	insig	PB.157	-0.025654	0.99047	insig	0.450394	0.180401	insig	-0.63744	0.0443487	insig	0.483991	0.249194	insig	1.08352	9.66494e-06	up	0.612631	0.139235	insig	-0.178108	0.50996	insig	-0.700428	0.0129919	insig	-1.14729	0.00171128	up	0.0531458	0.823826	insig
-0.0826079	0.901187	insig	-0.0211599	0.986687	insig	0.856397	0.0283653	insig	0.0409475	0.993728	insig	-0.844741	0.708889	insig	-0.906955	0.0459855	insig	PB.159	-0.426403	0.747359	insig	0.142907	0.829166	insig	0.587668	0.18627	insig	0.574588	0.388502	insig	-0.449055	0.316106	insig	-1.00989	0.0510401	insig	-1.58939	8.22967e-06	up	-1.23901	0.0147324	up	-1.79635	0.00428182	up	-1.35322	6.80175e-06	up
-0.508787	0.0611831	insig	-1.25498	0.0757398	insig	-0.58583	0.255637	insig	-0.765425	0.707476	insig	-0.633645	0.873333	insig	0.104004	0.899757	insig	PB.161	-0.428263	0.414	insig	-0.664625	0.00219962	insig	-1.45646	6.65354e-09	down	-0.229275	0.664076	insig	0.786966	0.0110999	insig	1.03005	0.0122965	up	-1.25299	1.50129e-11	up	-1.32669	5.03974e-06	up	-1.87914	0.00230707	up	-0.409016	0.516324	insig
-1.94914	0.133029	insig	-1.95443	0.0398532	down	-1.87963	0.00307871	down	-0.0252977	0.997482	insig	-0.0512745	0.995304	insig	-0.0513147	0.978048	insig	PB.162	1.61579	0.0546724	insig	0.0172273	0.988224	insig	-2.41797	0.000475275	down	-1.59663	1.09609e-05	down	2.42911	6.65061e-10	up	4.0385	5.3027e-31	up	1.06139	0.0283115	down	-2.49749	0.085592	insig	-0.946843	0.322089	insig	1.57462	0.061818	insig
-0.695655	0.00978987	insig	-0.516154	0.225917	insig	-0.45129	0.112922	insig	0.159262	0.906049	insig	-0.0337236	0.993405	insig	-0.215413	0.38299	insig	PB.163	-0.0394053	0.987827	insig	-0.109971	0.811858	insig	-0.15	0.742463	insig	-0.0645337	0.927432	insig	0.0351675	0.929783	insig	0.112406	0.899179	insig	1.91392	2.20591e-14	down	1.26332	4.08939e-06	down	1.46841	1.48407e-06	down	1.58071	5.26687e-14	down
-0.456716	0.100903	insig	-0.902105	0.14534	insig	-1.01837	0.00158021	down	-0.465007	0.82235	insig	0.14872	0.985461	insig	0.588882	0.0988309	insig	PB.164	-0.235659	0.646244	insig	-0.0888964	0.760371	insig	-0.520974	0.0308409	insig	0.152103	0.678545	insig	0.42719	0.0908558	insig	0.288203	0.526675	insig	-0.453447	0.0352718	insig	-0.668745	0.00838362	insig	-1.3069	0.0099828	up	-0.980819	0.00663196	insig
1.97528	0.0031406	up	1.38289	0.272813	insig	1.02649	0.206509	insig	-0.615371	0.864213	insig	0.381502	0.96437	insig	0.980868	0.0245051	insig	PB.166	4.74894	0.00402901	up	1.36614	0.710984	insig	5.15748	0.000112655	up	-3.37807	0.0566331	insig	-3.79866	0.00455177	down	-0.412132	0.774445	insig	4.73248	2.82811e-05	down	1.96481	7.57984e-05	down	4.7128	0.000181414	down	0.569586	0.336837	insig
0.376889	0.179205	insig	1.16599	0.125983	insig	0.695045	0.0329674	insig	0.7662	0.729505	insig	0.500156	0.913497	insig	-0.285315	0.529343	insig	PB.168	0.159998	0.772181	insig	-0.0208434	0.955136	insig	0.975945	4.29636e-07	insig	-0.175642	0.659785	insig	-1.00171	2.59398e-05	down	-0.814249	0.0058194	insig	-0.685003	0.000126413	insig	-0.461833	0.0959896	insig	0.456327	0.551617	insig	-0.99818	0.00375046	insig
0.566957	0.194535	insig	0.923704	0.12289	insig	0.591368	0.260917	insig	0.336433	0.786558	insig	0.361268	0.884781	insig	0.00360742	0.995313	insig	PB.170	-0.00105665	0.999287	insig	0.113858	0.692215	insig	0.185418	0.530517	insig	0.11996	0.796783	insig	-0.0763871	0.799707	insig	-0.182545	0.738257	insig	-1.48652	1.76479e-05	up	-0.911601	0.000718642	insig	-0.717449	0.0305827	insig	-1.11193	0.00275939	up
0.52656	0.0888583	insig	0.572521	0.393316	insig	0.112819	0.764106	insig	0.0239634	0.993728	insig	0.489399	0.862641	insig	0.444569	0.24014	insig	PB.172	0.38003	0.724766	insig	0.388429	0.283885	insig	0.7801	0.00748499	insig	0.0119552	0.989327	insig	-0.397195	0.159791	insig	-0.395177	0.430068	insig	-0.644087	0.0114634	insig	-0.491881	0.191204	insig	-0.501839	0.397154	insig	-1.34261	6.10243e-08	up
0.907388	0.0584542	insig	1.07208	0.0904621	insig	0.99189	0.103549	insig	0.142508	0.971547	insig	0.113538	0.993405	insig	-0.0483504	0.969065	insig	PB.173	0.0977648	0.99047	insig	0.184905	0.914183	insig	-0.110729	0.95309	insig	0.0949958	0.927192	insig	0.292739	0.290104	insig	0.213495	0.817556	insig	-1.50579	0.0148135	up	-0.687123	0.294003	insig	-0.661286	0.265739	insig	-0.439207	0.554359	insig
0.302456	0.214852	insig	0.587127	0.149929	insig	0.262101	0.40545	insig	0.263087	0.841985	insig	0.352795	0.853322	insig	0.069682	0.87071	insig	PB.174	-0.261224	0.821792	insig	-0.561977	0.0813629	insig	0.378062	0.282078	insig	-0.295196	0.558772	insig	-0.94503	0.000565059	insig	-0.638074	0.189918	insig	0.58185	0.0122889	insig	1.15166	5.50147e-06	down	1.68973	3.17139e-07	down	0.434386	0.151825	insig
0.827488	0.00473679	insig	1.02555	0.11361	insig	0.095657	0.827542	insig	0.176087	0.952538	insig	0.962694	0.583146	insig	0.765469	0.0556245	insig	PB.176	0.0222962	0.988993	insig	-0.0490029	0.902854	insig	0.506948	0.0351337	insig	-0.06637	0.904052	insig	-0.560837	0.0372751	insig	-0.482847	0.221282	insig	-0.798161	1.21368e-05	insig	0.0133977	0.974687	insig	0.234952	0.731991	insig	-1.24138	0.000312165	up
-0.0266359	0.942724	insig	-0.433064	0.673423	insig	-1.18454	0.00157997	down	-0.423346	0.904464	insig	0.786917	0.830372	insig	1.18079	0.00525253	up	PB.177	0.121791	0.917148	insig	0.0867117	0.75429	insig	-0.1523	0.691856	insig	-0.0303264	0.955375	insig	0.23407	0.47329	insig	0.278432	0.62032	insig	0.695315	2.76366e-05	insig	0.552802	0.0779884	insig	0.138522	0.886217	insig	-0.365739	0.49245	insig
0.345242	0.249824	insig	0.63814	0.107965	insig	0.145002	0.757749	insig	0.272543	0.719944	insig	0.522396	0.680312	insig	0.22936	0.584184	insig	PB.179	-0.238164	0.713256	insig	-0.725386	0.0406098	insig	0.289779	0.20797	insig	-0.482789	0.376771	insig	-1.01998	0.00336401	down	-0.525619	0.0607331	insig	0.085059	0.767082	insig	0.673624	0.00094961	insig	1.40838	0.00013745	down	-0.0926347	0.812192	insig
-0.204825	0.525138	insig	-1.00421	0.0284512	down	-1.21901	0.00170892	down	-0.818249	0.31754	insig	0.24688	0.958934	insig	1.03953	0.00944415	up	PB.180	-0.0418548	0.982334	insig	0.0975328	0.797493	insig	-0.0959214	0.809295	insig	0.145567	0.710203	insig	0.188914	0.422149	insig	0.0565486	0.928758	insig	0.303619	0.255909	insig	0.146399	0.644803	insig	-0.837447	0.028995	insig	-0.848081	0.058292	insig
0.311595	0.51815	insig	0.73884	0.475918	insig	1.10491	0.00126942	up	0.408168	0.921551	insig	-0.342845	0.969339	insig	-0.773337	0.139753	insig	PB.182	0.931534	0.605064	insig	0.0618036	0.926726	insig	0.296971	0.500987	insig	-0.862886	0.471686	insig	-0.240284	0.687947	insig	0.628852	0.613067	insig	-0.445194	0.0502092	insig	-1.0594	0.171369	insig	0.196629	0.854476	insig	0.337223	0.48691	insig
1.021	0.263045	insig	1.98609	0.184966	insig	2.82423	0.00310592	up	0.940442	0.836648	insig	-0.810089	0.929788	insig	-1.76784	0.0588277	insig	PB.183	0.53836	0.935187	insig	1.39098	0.0738933	insig	1.68545	0.0268166	up	0.852796	0.646347	insig	-0.298696	0.704379	insig	-1.13662	0.529453	insig	-0.370184	0.697513	insig	0.119745	0.931954	insig	0.178431	0.899897	insig	0.731511	0.485638	insig
1.48075	0.0851974	insig	2.27936	0.180225	insig	-0.27701	0.839937	insig	0.774976	0.904675	insig	2.59467	0.478374	insig	1.79672	0.0579883	insig	PB.185	0.13534	0.947478	insig	-0.000398523	0.999675	insig	0.309323	0.454747	insig	-0.131158	0.862263	insig	-0.314508	0.407637	insig	-0.169126	0.841298	insig	-3.722	5.53227e-15	up	-2.37448	0.000135129	up	-1.4883	0.271296	insig	-4.34397	8.84922e-12	up
3.2737	0.181991	insig	1.92471	0.730291	insig	-1.95985	0.758264	insig	-1.40592	0.865562	insig	3.91021	0.879595	insig	5.29228	0.0512616	insig	PB.186	-0.957851	0.447453	insig	-0.864608	0.165229	insig	-3.118	5.92138e-06	down	0.100151	0.92997	insig	2.24998	0.000208004	up	2.16347	0.0384949	up	-7.55525	3.63199e-10	up	-3.34131	0.000423815	up	-4.88016	9.4057e-07	up	-6.47619	0.00428855	up
0.296076	0.470402	insig	1.14151	0.0650833	insig	1.11459	0.000400791	up	0.824422	0.569053	insig	0.0518637	0.993405	insig	-0.792733	0.0122487	insig	PB.190	0.211332	0.885378	insig	0.118324	0.751939	insig	0.0456013	0.909408	insig	-0.0869972	0.876038	insig	0.067439	0.79499	insig	0.166982	0.760904	insig	-1.5763	8.58489e-09	up	-1.48639	1.12993e-05	up	-0.596238	0.269674	insig	-0.537662	0.0206767	insig
0.896902	0.806196	insig	1.88887	0.571634	insig	1.3924	0.590225	insig	0.97186	0.909995	insig	0.517133	0.974346	insig	-0.469229	0.857589	insig	PB.193	1.12843	0.617243	insig	-1.82904	0.0967905	insig	0.257412	0.875917	insig	-2.94925	0.000238705	down	-2.09087	0.0554728	insig	0.866989	0.546373	insig	-4.22501	0.0016292	up	-4.46365	2.48572e-05	up	-0.561687	0.719496	insig	-3.12883	0.00122684	up
-0.904356	0.0238565	insig	0.0716513	0.941537	insig	-1.31573	0.000384	down	0.952285	0.625852	insig	1.41288	0.268397	insig	0.446087	0.479408	insig	PB.194	-0.824943	0.465798	insig	-0.678017	0.163432	insig	-1.32356	0.00850168	down	0.155896	0.806588	insig	0.641774	0.000302791	insig	0.497051	0.384513	insig	-1.05342	0.00643696	up	-1.12697	0.0195734	up	-0.344764	0.619874	insig	-1.07887	0.00612292	up
0.548952	0.0230612	insig	0.661264	0.269389	insig	0.12485	0.778513	insig	0.0929921	0.974644	insig	0.569514	0.808021	insig	0.453708	0.229442	insig	PB.196	0.0653291	0.977633	insig	-0.503479	0.149768	insig	0.595355	0.0103113	insig	-0.565349	0.339073	insig	-1.10362	0.00020637	down	-0.525493	0.307913	insig	0.333414	0.150679	insig	0.822953	0.0118787	insig	1.46012	0.00437441	down	-0.169788	0.667722	insig
0.914533	0.00208227	insig	1.6274	0.0150299	up	0.69156	0.157276	insig	0.692604	0.729505	insig	0.966697	0.681874	insig	0.253207	0.699895	insig	PB.197	0.33111	0.781832	insig	0.0341921	0.946616	insig	0.910906	0.0022286	insig	-0.292752	0.637159	insig	-0.881356	0.00399461	insig	-0.576471	0.282338	insig	-0.445779	0.097189	insig	0.143024	0.733375	insig	1.10425	0.077968	insig	-0.698636	0.192015	insig
-1.24218	0.0268884	down	-1.42045	0.13544	insig	-1.0543	0.0374723	down	-0.197046	0.96596	insig	-0.326527	0.970514	insig	-0.15838	0.859251	insig	PB.198	-2.36354	0.430198	insig	-2.58387	0.151792	insig	-0.367066	0.864965	insig	-0.218021	0.961036	insig	-2.22463	0.215729	insig	-2.00278	0.312891	insig	4.83041	3.16992e-05	down	5.96243	4.58418e-17	down	5.95814	1.92573e-07	down	4.11137	6.56629e-10	down
-0.108174	0.757079	insig	-0.325421	0.57976	insig	-0.210926	0.557187	insig	-0.237014	0.895665	insig	-0.0842618	0.99147	insig	0.13099	0.663079	insig	PB.199	-0.241105	0.847291	insig	-0.667148	0.0430261	insig	-0.308984	0.39295	insig	-0.419901	0.405341	insig	-0.362781	0.276099	insig	0.0688393	0.928758	insig	1.58107	1.92315e-09	down	1.71907	1.89468e-13	down	1.88386	2.87807e-06	down	1.64639	8.89712e-13	down
-0.755663	0.0183603	insig	-1.35826	0.00362638	down	-0.74059	0.0205971	insig	-0.621559	0.645508	insig	-0.585953	0.722402	insig	0.00984521	0.986393	insig	PB.201	0.0060357	0.998971	insig	0.300032	0.464464	insig	0.101654	0.825428	insig	0.297138	0.608831	insig	0.192963	0.567938	insig	-0.0913761	0.904297	insig	1.64005	2.4612e-10	down	0.884216	0.0171177	insig	-0.0562851	0.921509	insig	0.767761	0.013744	insig
0.489695	0.855661	insig	0.175785	0.963672	insig	2.72292	0.0193383	up	-0.339665	0.982859	insig	-2.5201	0.474121	insig	-2.21055	0.14271	insig	PB.202	-0.812028	0.932185	insig	0.550452	0.596852	insig	-0.674659	0.586806	insig	1.36024	0.615955	insig	1.21921	0.103828	insig	-0.125544	0.97878	insig	-2.97172	0.00484575	up	-1.66113	0.582453	insig	-3.38348	0.00240815	up	0.398048	0.646531	insig
-0.712163	0.00993537	insig	-1.18876	2.31498e-05	down	-0.373854	0.325932	insig	-0.495659	0.604043	insig	-0.785346	0.433896	insig	-0.315258	0.536274	insig	PB.203	0.109079	0.935187	insig	-0.28444	0.300927	insig	-0.387482	0.163595	insig	-0.387395	0.259186	insig	0.098322	0.750637	insig	0.498904	0.286972	insig	2.03611	3.18674e-32	down	1.2215	8.29647e-05	down	1.09254	5.11678e-05	down	2.02218	1.48501e-07	down
-0.744927	0.00333612	insig	-0.312955	0.71194	insig	-0.540424	0.042734	insig	0.411205	0.876784	insig	0.256098	0.968817	insig	-0.175422	0.50166	insig	PB.204	0.508315	0.467298	insig	-0.200036	0.570792	insig	-0.105994	0.825927	insig	-0.701817	0.100141	insig	-0.0990927	0.81638	insig	0.614314	0.317206	insig	2.91677	3.73106e-39	down	1.66814	1.78222e-09	down	2.76533	1.04221e-06	down	2.45019	1.61354e-21	down
0.391864	0.298422	insig	0.548641	0.441122	insig	0.09196	0.86786	insig	0.134666	0.965207	insig	0.48476	0.887733	insig	0.329926	0.559347	insig	PB.205	0.350554	0.618893	insig	0.225468	0.43651	insig	-0.103683	0.829471	insig	-0.118555	0.831859	insig	0.324365	0.377514	insig	0.454485	0.471073	insig	1.33142	7.80993e-08	down	1.37851	8.16833e-05	down	1.61667	0.00200195	down	1.50058	0.000811031	down
-1.23467	0.0189582	down	-2.56514	0.00018094	down	-2.0716	4.45395e-10	down	-1.34978	0.491043	insig	-0.462974	0.914402	insig	0.862557	0.172991	insig	PB.206	0.801183	0.0424174	insig	-0.317527	0.591942	insig	-1.4684	2.73742e-26	down	-1.10976	0.0943928	insig	1.14628	0.0190511	up	2.26981	2.87708e-13	up	1.34161	1.30526e-06	down	-0.688951	0.272473	insig	-0.945668	0.225533	insig	0.706109	0.0129046	insig
-0.733964	0.69618	insig	-1.33871	0.596066	insig	-0.799895	0.783115	insig	-0.620359	0.917011	insig	-0.500684	0.98671	insig	0.0842123	0.979253	insig	PB.208	1.58785	0.669454	insig	3.72763	8.59538e-07	up	2.45928	0.0312887	up	2.13499	0.0515869	insig	1.26115	0.0441189	up	-0.857911	0.635847	insig	0.534375	0.747163	insig	-1.79245	0.156679	insig	-4.57437	4.09342e-09	up	-2.75545	0.152244	insig
0.200245	0.491168	insig	0.603587	0.236318	insig	0.18753	0.620739	insig	0.381817	0.814597	insig	0.444403	0.850362	insig	0.0423594	0.9425	insig	PB.209	0.145804	0.932043	insig	0.267487	0.295893	insig	0.030075	0.933812	insig	0.128591	0.803799	insig	0.23279	0.189929	insig	0.11584	0.851275	insig	-1.46636	1.88183e-13	up	-1.40565	2.72846e-06	up	-1.17258	0.00254193	up	-1.34015	9.26446e-06	up
0.960485	0.00317864	insig	0.745248	0.480706	insig	-0.0120691	0.970738	insig	-0.236909	0.957015	insig	0.790647	0.842154	insig	1.00511	0.00323018	up	PB.210	0.0133578	0.997215	insig	-0.131958	0.832923	insig	0.81081	0.011798	insig	-0.143535	0.86777	insig	-0.94852	0.0113858	insig	-0.792545	0.0413648	insig	-1.25941	8.67801e-07	up	-0.306272	0.485778	insig	-0.421572	0.682164	insig	-2.11275	2.43961e-46	up
2.08344	0.00967331	up	3.33617	0.0118087	up	2.06601	0.00246914	up	1.23754	0.766535	insig	1.31179	0.775191	insig	0.0512398	0.966889	insig	PB.212	0.0483429	0.988993	insig	-0.393341	0.554836	insig	0.623427	0.234744	insig	-0.433333	0.574171	insig	-1.02096	0.0187834	down	-0.574516	0.262831	insig	-4.07102	5.86511e-16	up	-2.02677	0.00090753	up	-0.373814	0.782372	insig	-2.65937	2.30688e-12	up
0.410552	0.138171	insig	0.283289	0.486992	insig	0.120482	0.777966	insig	-0.14869	0.900941	insig	0.191848	0.953214	insig	0.318596	0.410225	insig	PB.213	-0.0584254	0.979758	insig	-0.435463	0.291738	insig	0.0945028	0.867749	insig	-0.371907	0.523337	insig	-0.535088	0.207063	insig	-0.151582	0.86327	insig	1.71196	6.50847e-12	down	2.1871	3.40056e-19	down	2.39123	3.94343e-16	down	1.71052	3.47753e-06	down
0.908257	0.0180405	insig	1.09934	0.169978	insig	0.771479	0.0305366	insig	0.16903	0.961623	insig	0.359759	0.94728	insig	0.168841	0.717775	insig	PB.214	0.0641297	0.968332	insig	0.737272	0.000689702	insig	0.380223	0.137757	insig	0.679159	0.0121533	insig	0.352429	0.144376	insig	-0.312695	0.444163	insig	-1.62098	1.62146e-08	up	-0.769142	0.0227623	insig	-1.30072	0.0421742	up	-1.25937	4.02274e-09	up
0.0476795	0.889265	insig	0.361135	0.57669	insig	0.450904	0.14327	insig	0.29178	0.886601	insig	-0.0634533	0.993405	insig	-0.374649	0.142175	insig	PB.215	0.142569	0.931976	insig	0.867035	0.000825778	insig	0.533255	0.073115	insig	0.729776	0.00458525	insig	0.328375	0.127826	insig	-0.3891	0.233645	insig	-0.597928	0.0241763	insig	-0.68843	0.00119689	insig	-1.14693	0.0117998	up	-0.71344	0.00244209	insig
-0.32736	0.308118	insig	-0.471523	0.487771	insig	-0.730491	0.0173466	insig	-0.162393	0.946644	insig	0.292373	0.94289	insig	0.430573	0.0205544	insig	PB.216	0.233368	0.93429	insig	-0.0119053	0.990382	insig	-0.598438	0.374744	insig	-0.238271	0.778515	insig	0.582407	0.253698	insig	0.833657	0.314567	insig	5.33219	1.98303e-62	down	4.77658	8.77287e-102	down	4.83417	2.07049e-24	down	5.16785	2.68225e-125	down
0.736255	0.0445178	insig	0.723516	0.34801	insig	0.263898	0.482155	insig	-0.0324342	0.993728	insig	0.493359	0.88724	insig	0.504122	0.190425	insig	PB.217	0.954267	0.617471	insig	-0.73531	0.437974	insig	-0.0941488	0.941351	insig	-1.6884	0.0176164	down	-0.647302	0.374716	insig	1.05458	0.26464	insig	4.88825	1.31448e-31	down	4.67019	2.24503e-37	down	6.31064	1.94479e-26	down	5.21134	4.98019e-77	down
0.305859	0.472564	insig	0.7657	0.195872	insig	0.37066	0.463818	insig	0.438854	0.807703	insig	0.425517	0.894939	insig	-0.0338603	0.965509	insig	PB.218	-0.0434972	0.988993	insig	0.0173253	0.981514	insig	-1.08019	0.0256529	down	0.0676816	0.944994	insig	1.09322	0.0160416	up	1.03958	0.169478	insig	0.574904	0.112875	insig	0.930304	0.0186736	insig	1.28058	0.00727955	down	1.99254	1.25939e-05	down
-0.12075	0.763871	insig	-1.2326	0.0672522	insig	-0.677676	0.202264	insig	-1.12994	0.443264	insig	-0.523369	0.913497	insig	0.578968	0.363223	insig	PB.220	-0.408961	0.522413	insig	-0.0624189	0.894284	insig	-1.02587	0.00102045	down	0.353857	0.325848	insig	0.95915	0.000438694	insig	0.619278	0.0957597	insig	-1.76616	6.38733e-13	up	-1.47088	7.87464e-07	up	-2.97237	6.67697e-08	up	-1.44364	0.0117666	up
0.46894	0.200394	insig	0.433936	0.692162	insig	0.501087	0.291467	insig	-0.0556332	0.991989	insig	-0.033106	0.99657	insig	-0.000446495	0.999482	insig	PB.221	0.43406	0.885378	insig	-0.846899	0.198802	insig	-1.26143	0.086932	insig	-1.27949	0.000104041	down	0.408141	0.271501	insig	1.70185	4.9649e-05	up	-1.27796	0.0115551	up	-1.23863	4.60264e-05	up	-0.0381578	0.968775	insig	0.450073	0.35487	insig
-0.799443	0.0854992	insig	-1.64353	0.0335568	down	-1.21007	0.00281749	down	-0.86223	0.716593	insig	-0.400057	0.945397	insig	0.436633	0.451431	insig	PB.222	0.545445	0.631544	insig	-0.64737	0.570792	insig	0.0359111	0.963146	insig	-1.1838	0.417622	insig	-0.687256	0.552558	insig	0.510696	0.605562	insig	3.21908	1.3945e-21	down	1.88069	8.72136e-05	down	2.18459	0.0231523	down	1.94221	1.2616e-06	down
0.47896	0.253703	insig	1.03756	0.14745	insig	0.843511	0.0852519	insig	0.535156	0.824219	insig	0.2208	0.977682	insig	-0.331576	0.613154	insig	PB.223	-0.40092	0.829594	insig	0.319778	0.588354	insig	-0.235028	0.740083	insig	0.726968	0.0021255	insig	0.550933	0.00944195	insig	-0.163885	0.758004	insig	-1.84647	4.51783e-06	up	-0.958618	0.00892859	insig	-1.17305	0.0360821	up	-0.798952	0.0994657	insig
0.206732	0.429934	insig	0.507328	0.134633	insig	0.436756	0.222231	insig	0.280022	0.706793	insig	0.0995511	0.984675	insig	-0.200767	0.638889	insig	PB.224	0.0809468	0.965002	insig	-0.697867	0.0141792	insig	0.480459	0.0639306	insig	-0.774711	0.0439633	insig	-1.18328	1.03809e-05	down	-0.396488	0.387169	insig	1.14119	7.18196e-08	down	1.27239	1.18467e-07	down	2.30703	2.68843e-16	down	1.06502	0.00162227	down
0.213012	0.405364	insig	0.662972	0.032111	insig	0.33483	0.315994	insig	0.429344	0.425427	insig	0.357088	0.80717	insig	-0.092624	0.83428	insig	PB.225	0.114315	0.910569	insig	-0.589965	0.0403868	insig	0.427669	0.0274528	insig	-0.699873	0.0471273	insig	-1.02267	0.000173915	down	-0.311112	0.336331	insig	0.79937	3.72159e-05	insig	0.903374	5.02673e-06	insig	2.01286	8.4742e-12	down	0.674119	0.0236459	insig
0.406589	0.344276	insig	0.339917	0.58854	insig	0.0281262	0.96808	insig	-0.0860783	0.951968	insig	0.342269	0.904264	insig	0.406257	0.403556	insig	PB.226	0.191674	0.917717	insig	-0.0835808	0.883517	insig	0.580063	0.11699	insig	-0.269888	0.634058	insig	-0.668164	0.0280655	insig	-0.385829	0.489027	insig	0.640198	0.102007	insig	0.86079	0.00366517	insig	1.02421	0.000963842	down	0.0557494	0.913562	insig
-0.552778	0.634578	insig	1.05562	0.290411	insig	0.795973	0.382922	insig	1.58501	0.444144	insig	0.286133	0.976311	insig	-1.31436	0.205311	insig	PB.229	1.13264	0.368447	insig	0.780024	0.336734	insig	1.12175	0.161496	insig	-0.345858	0.752009	insig	-0.345907	0.645373	insig	0.0122991	0.993376	insig	-1.12726	0.107042	insig	-2.80634	0.000333417	up	-0.894892	0.19834	insig	-1.48701	0.0378105	up
-0.313758	0.301897	insig	-0.166895	0.850807	insig	0.156286	0.68843	insig	0.126682	0.969235	insig	-0.296938	0.955822	insig	-0.445064	0.198644	insig	PB.231	0.396903	0.66935	insig	-0.535007	0.0120168	insig	-0.489505	0.00695552	insig	-0.92411	0.0215124	insig	-0.0501462	0.860255	insig	0.885676	0.0421817	insig	0.911817	1.82305e-05	insig	0.205779	0.62074	insig	1.23921	0.0358821	down	1.52747	1.08875e-07	down
-0.496191	0.0934494	insig	-0.227955	0.763557	insig	-0.198652	0.587868	insig	0.247775	0.924266	insig	-0.00113184	0.999851	insig	-0.270529	0.526872	insig	PB.232	0.26974	0.698708	insig	0.185251	0.545195	insig	-0.247388	0.446481	insig	-0.0790951	0.874285	insig	0.427634	0.112904	insig	0.519361	0.257867	insig	1.84103	4.06655e-19	down	1.08042	0.00029896	down	1.38802	0.00739817	down	1.85905	2.4277e-09	down
1.1211	0.343366	insig	1.7654	0.155268	insig	1.12482	0.341867	insig	0.623078	0.871319	insig	0.670078	0.917237	insig	0.0252173	0.986672	insig	PB.234	-0.235297	0.945342	insig	-0.673505	0.328179	insig	-0.942091	0.179269	insig	-0.429006	0.585744	insig	0.264824	0.641148	insig	0.707051	0.358523	insig	-4.6116	1.07509e-13	up	-3.24442	1.36557e-07	up	-2.21224	0.000316877	up	-2.56894	9.21551e-05	up
-0.605715	0.0176216	insig	-1.13883	0.00133323	down	-0.653497	0.00964324	insig	-0.554088	0.476993	insig	-0.456547	0.715423	insig	0.0759554	0.848942	insig	PB.240	-0.286673	0.817924	insig	0.200127	0.59918	insig	-0.528067	0.170695	insig	0.491678	0.249729	insig	0.723711	0.0157473	insig	0.245544	0.74387	insig	0.230201	0.37473	insig	-0.0817257	0.835195	insig	-1.14705	0.000260927	up	0.0752312	0.83293	insig
-0.882786	0.00326706	insig	-0.850781	0.144713	insig	-1.0322	0.00052167	down	0.0124632	0.997389	insig	0.211125	0.971555	insig	0.175028	0.719126	insig	PB.241	0.684766	0.204223	insig	0.0238376	0.964382	insig	-0.0747187	0.875557	insig	-0.654583	0.133347	insig	0.0933719	0.822532	insig	0.760161	0.142101	insig	2.59416	1.03064e-29	down	1.03174	0.00280297	down	1.68103	0.000639318	down	1.60706	8.74053e-07	down
-0.18001	0.580421	insig	0.0400421	0.952676	insig	-0.253446	0.435227	insig	0.200661	0.906414	insig	0.323428	0.880832	insig	0.100188	0.761154	insig	PB.242	0.106299	0.955605	insig	-0.244735	0.462579	insig	0.327846	0.307719	insig	-0.346075	0.426989	insig	-0.577446	0.00717175	insig	-0.218318	0.706361	insig	0.958267	0.000164539	insig	0.67677	0.019592	insig	1.20355	0.000995652	down	0.345264	0.130522	insig
-0.221701	0.424958	insig	-0.0642977	0.903868	insig	-0.0702466	0.813119	insig	0.136875	0.934813	insig	0.0335572	0.993405	insig	-0.125236	0.718628	insig	PB.243	0.0484321	0.973827	insig	0.0381497	0.908118	insig	-0.158332	0.577769	insig	-0.00486206	0.99123	insig	0.191587	0.332425	insig	0.209317	0.625557	insig	-0.814375	1.06703e-05	insig	-1.07826	1.85303e-05	up	-0.956773	0.00196885	insig	-0.756256	0.000437178	insig
0.359331	0.620652	insig	0.25176	0.83087	insig	0.353066	0.649492	insig	-0.129022	0.965456	insig	-0.0754698	0.993405	insig	0.0323991	0.959656	insig	PB.244	-0.0584251	0.981971	insig	0.0758807	0.910208	insig	0.156823	0.74989	insig	0.13726	0.880495	insig	-0.0864332	0.875549	insig	-0.211055	0.794762	insig	-1.29786	0.0124982	up	-0.871277	0.0315771	insig	-1.16181	0.0445985	up	-1.12807	0.000396477	up
-0.207311	0.407421	insig	0.0814105	0.88905	insig	-0.0114013	0.979586	insig	0.268137	0.860478	insig	0.120333	0.984675	insig	-0.167596	0.69098	insig	PB.245	-0.136104	0.919891	insig	-0.871991	0.00757007	insig	-0.000430461	0.999243	insig	-0.730761	0.0801313	insig	-0.876311	0.00649986	insig	-0.134452	0.74387	insig	0.431691	0.0540306	insig	0.365717	0.0987847	insig	1.34478	0.00135972	down	0.387584	0.257097	insig
0.0881487	0.839997	insig	0.509949	0.186378	insig	0.627641	0.0380266	insig	0.401498	0.709678	insig	-0.0880338	0.984675	insig	-0.512558	0.153336	insig	PB.246	0.807364	0.0660234	insig	0.165365	0.725127	insig	-0.114881	0.828546	insig	-0.636313	0.128141	insig	0.27531	0.500801	insig	0.923839	0.103995	insig	0.645925	0.0186284	insig	-0.06735	0.885202	insig	0.950492	0.00176797	insig	1.35888	8.40004e-06	down
0.70823	0.0575923	insig	0.924706	0.0698857	insig	1.01527	0.00260984	up	0.195486	0.923741	insig	-0.0635373	0.993405	insig	-0.279739	0.499372	insig	PB.247	0.0228353	0.991274	insig	-0.110363	0.811723	insig	0.409734	0.206287	insig	-0.128713	0.840683	insig	-0.525375	0.0930188	insig	-0.383877	0.437783	insig	-1.07118	0.000213448	up	-0.379924	0.318938	insig	-0.0781647	0.880574	insig	-0.495275	0.0696319	insig
-0.343045	0.663064	insig	-1.12909	0.146641	insig	0.814697	0.1343	insig	-0.80899	0.697726	insig	-1.91158	0.0019273	down	-1.12157	0.0560525	insig	PB.248	-0.00781702	0.998971	insig	-0.468414	0.653626	insig	-0.0741977	0.951188	insig	-0.459532	0.733842	insig	-0.40063	0.617097	insig	0.073976	0.963625	insig	-0.0170912	0.980906	insig	-0.350614	0.69076	insig	-0.719724	0.3115	insig	0.834515	0.0480818	insig
-0.941774	0.00201273	insig	-0.462752	0.549343	insig	1.7504	0.00121479	up	0.456283	0.831531	insig	-2.19108	0.0321131	down	-2.66471	1.21838e-07	down	PB.250	0.723522	0.642544	insig	0.490927	0.491861	insig	-0.404568	0.60771	insig	-0.228903	0.704775	insig	0.889119	0.00983591	insig	1.13176	1.11072e-05	up	0.463829	0.348367	insig	-1.19687	5.82432e-11	up	-0.533743	0.410119	insig	2.58471	1.48919e-05	down
-0.875004	0.00529865	insig	-0.988958	0.027839	insig	0.642719	0.131855	insig	-0.134036	0.946133	insig	-1.60374	0.0144809	down	-1.49344	0.00019116	down	PB.251	0.410583	0.69872	insig	0.332272	0.376609	insig	-0.484451	0.393586	insig	-0.0730181	0.91448	insig	0.812366	0.0506385	insig	0.900379	0.188538	insig	0.897773	0.00170598	insig	-0.381923	0.332226	insig	-0.463885	0.246542	insig	1.99558	7.83424e-05	down
-1.51723	0.0551671	insig	-1.61505	0.107476	insig	1.01886	0.145025	insig	-0.124258	0.98126	insig	-2.60727	0.00047263	down	-2.50027	2.54932e-05	down	PB.253	1.06607	0.587466	insig	1.37082	0.0126694	up	1.11	0.0628978	insig	0.307789	0.837914	insig	0.255364	0.696782	insig	-0.0345599	0.9844	insig	1.28779	0.0437937	down	-1.28713	0.173081	insig	-1.74087	0.00810704	up	1.16643	0.00957376	down
-2.83153	4.09934e-06	down	-4.49099	1.42221e-05	down	-0.996892	0.125774	insig	-1.68207	0.659914	insig	-3.45985	0.0186211	down	-1.80356	0.0110094	down	PB.254	0.159604	0.982334	insig	1.66865	0.162324	insig	0.346925	0.819835	insig	1.51345	0.364649	insig	1.31582	0.26082	insig	-0.179676	0.941108	insig	2.8246	7.00915e-06	down	-0.159032	0.899434	insig	-3.37278	0.00694105	up	1.45392	0.0328733	down
-1.42929	0.0017096	down	-1.30996	0.0567584	insig	0.463556	0.345598	insig	0.0948065	0.976551	insig	-1.74845	0.00851058	down	-1.86095	1.12221e-07	down	PB.255	0.627804	0.634621	insig	1.01758	0.0479861	up	0.372917	0.534465	insig	0.393734	0.660526	insig	0.639186	0.204987	insig	0.261117	0.763788	insig	1.61868	0.000109548	down	-0.43127	0.408795	insig	-0.750043	0.232899	insig	1.68015	3.96959e-08	down
-2.09925	1.23352e-06	down	-2.89374	5.52777e-08	down	-0.557758	0.324332	insig	-0.81684	0.288554	insig	-2.30915	4.04023e-07	down	-1.5143	7.96879e-05	down	PB.257	0.0604788	0.987827	insig	0.235706	0.761381	insig	-1.30452	0.043526	down	0.179711	0.802447	insig	1.53449	0.000294995	up	1.36688	0.00829275	up	1.87481	0.000109478	down	-0.276607	0.48789	insig	-1.29267	0.000839998	up	2.59661	1.20819e-09	down
-1.08439	0.00777141	down	-1.80025	0.000651786	down	0.24993	0.547614	insig	-0.737033	0.62373	insig	-2.02281	0.000262032	down	-1.30764	0.000276607	down	PB.258	-0.19298	0.938547	insig	0.0797105	0.898423	insig	-0.457925	0.460897	insig	0.276709	0.681655	insig	0.532304	0.24687	insig	0.269191	0.818883	insig	0.468464	0.189041	insig	-0.415616	0.453761	insig	-1.44988	0.00101987	up	1.1462	0.00377199	down
-1.58319	0.0625751	insig	-2.11534	0.0390797	down	0.48045	0.536634	insig	-0.555388	0.914096	insig	-2.56682	0.0422373	down	-2.03143	0.0136621	down	PB.259	0.220649	0.971535	insig	1.27583	0.141143	insig	0.479786	0.709987	insig	1.0591	0.419022	insig	0.791115	0.380322	insig	-0.253293	0.918858	insig	1.45737	0.0285203	down	-0.336668	0.808437	insig	-1.97003	0.023643	up	1.43109	0.0495394	down
-1.17471	0.0603026	insig	-1.83769	0.00149382	down	0.202916	0.799601	insig	-0.688113	0.812236	insig	-2.00886	0.066412	insig	-1.33876	0.109814	insig	PB.260	-0.342477	0.890697	insig	1.0006	0.0179813	up	-0.677709	0.466471	insig	1.34754	0.00310341	up	1.67215	0.00585062	up	0.335398	0.849993	insig	0.577145	0.167946	insig	-0.247639	0.796462	insig	-2.30029	2.52015e-08	up	1.42555	0.0880202	insig
-0.847545	0.0169343	insig	-0.751268	0.238555	insig	0.817866	0.0179226	insig	0.0742336	0.979038	insig	-1.54289	0.0158312	down	-1.63601	2.852e-11	down	PB.261	0.169546	0.939676	insig	0.514828	0.175232	insig	-0.032749	0.96222	insig	0.349307	0.36722	insig	0.542358	0.0931843	insig	0.206891	0.789337	insig	0.166352	0.670984	insig	-0.845125	0.00741281	insig	-1.13997	0.0120924	up	0.9846	0.00229657	insig
NA	NA	insig	NA	NA	insig	NA	NA	insig	NA	NA	insig	NA	NA	insig	NA	NA	insig	PB.264	-0.106255	0.976009	insig	0.329168	0.509225	insig	-0.224443	0.716825	insig	0.440797	0.544414	insig	0.549405	0.0811877	insig	0.122845	0.918066	insig	-9.70459	9.00733e-14	up	-9.82134	7.8688e-12	up	-10.2725	1.23608e-14	up	-9.67224	8.94475e-13	up
1.20107	0.00307452	up	2.28767	0.00105672	up	3.46103	4.88223e-11	up	1.0651	0.54321	insig	-1.1444	0.651239	insig	-2.2274	0.000152371	down	PB.266	-0.0460783	0.985217	insig	0.584104	0.236441	insig	0.111415	0.840372	insig	0.637753	0.335653	insig	0.468416	0.36588	insig	-0.153319	0.829347	insig	-2.90034	3.12155e-22	up	-1.6477	4.58118e-06	up	-1.24291	0.0738348	insig	0.412602	0.580333	insig
3.96122	0.355724	insig	4.88297	0.157935	insig	4.50351	0.122903	insig	0.899969	0.914816	insig	0.411454	0.98366	insig	-0.507979	0.861876	insig	PB.267	-0.0123574	0.998944	insig	0.369024	0.414558	insig	-1.06116	0.0510471	insig	0.384995	0.718915	insig	1.42535	0.0028251	up	1.05543	0.385703	insig	-9.00351	6.51133e-12	up	-5.02569	5.45823e-06	up	-4.51942	1.79215e-14	up	-3.47349	4.71348e-05	up
-1.0117	0.000987962	down	-0.950525	0.138169	insig	-0.864635	0.0208988	insig	0.0402988	0.991315	insig	-0.0580739	0.993405	insig	-0.120121	0.800706	insig	PB.268	-0.328751	0.731862	insig	-0.295469	0.180626	insig	-0.396868	0.0460772	insig	0.0400732	0.956849	insig	0.0964504	0.702603	insig	0.0685216	0.930608	insig	1.42739	6.36766e-08	down	0.749566	0.0198169	insig	0.733066	0.176462	insig	0.929597	0.00553162	insig
1.85945	0.00345555	up	1.41561	0.0548065	insig	1.27888	0.0292612	up	-0.46433	0.86546	insig	0.163811	0.9837	insig	0.60855	0.404026	insig	PB.269	-0.15615	0.975266	insig	-0.200063	0.860689	insig	0.167921	0.879971	insig	-0.0349079	0.983102	insig	-0.371857	0.618875	insig	-0.325077	0.813833	insig	-1.08349	0.0969813	insig	0.940074	0.185674	insig	0.492987	0.461996	insig	-9.97206e-05	0.999822	insig
0.482804	0.13976	insig	0.8602	0.0630247	insig	0.409303	0.296007	insig	0.355063	0.82235	insig	0.480208	0.804203	insig	0.105318	0.855132	insig	PB.271	0.337344	0.780007	insig	0.143332	0.737193	insig	0.377269	0.331691	insig	-0.189493	0.748658	insig	-0.238609	0.460081	insig	-0.036953	0.964918	insig	-1.00921	0.000125827	up	-0.856209	0.0155315	insig	-0.333432	0.433561	insig	-1.0077	0.00518784	up
-1.5189	1.09069e-05	down	-1.64157	0.0024694	down	-1.15959	0.0105489	down	-0.144211	0.946644	insig	-0.454347	0.869705	insig	-0.332943	0.532032	insig	PB.274	-0.0266509	0.991803	insig	-0.116815	0.793168	insig	-0.672468	0.057425	insig	-0.0846935	0.869108	insig	0.550162	0.000854626	insig	0.64731	0.0863075	insig	0.946633	0.0062239	insig	-0.539708	0.0936736	insig	-0.617138	0.153699	insig	0.431139	0.360599	insig
0.75755	0.0204668	insig	0.815634	0.278661	insig	0.216334	0.664753	insig	0.0372063	0.993247	insig	0.632036	0.833444	insig	0.572024	0.180542	insig	PB.276	-0.228312	0.899263	insig	-0.29536	0.610171	insig	0.613975	0.00279724	insig	-0.0639808	0.959019	insig	-0.914221	0.05289	insig	-0.837434	0.10107	insig	-1.94634	1.63035e-16	up	-0.954108	0.0154242	insig	-0.874953	0.22297	insig	-2.37634	2.39919e-12	up
NA	NA	insig	NA	NA	insig	NA	NA	insig	NA	NA	insig	NA	NA	insig	NA	NA	insig	PB.278	0.353711	0.966485	insig	0.843726	0.32594	insig	0.199527	0.875472	insig	0.491695	0.828799	insig	0.640036	0.40599	insig	0.162774	0.960304	insig	-6.48325	0.000127255	up	-7.05758	0.00467605	up	-7.56481	2.1003e-06	up	-6.87511	0.000642703	up
-1.79085	0.0169445	down	-1.49195	0.148179	insig	0.19067	0.847443	insig	0.277923	0.928152	insig	-1.65441	0.0870786	insig	-1.95227	3.67597e-05	down	PB.279	-0.458394	0.890697	insig	0.0285972	0.984415	insig	-0.679767	0.534433	insig	0.494681	0.779895	insig	0.703376	0.555004	insig	0.226056	0.926479	insig	1.60531	0.0201863	down	0.276303	0.760896	insig	0.0392302	0.970514	insig	2.4397	0.000148465	down
0.552449	0.139761	insig	-0.429311	0.701097	insig	1.72103	7.01349e-07	up	-1.00125	0.664859	insig	-2.11381	0.0661145	insig	-1.13858	8.65552e-06	down	PB.282	1.47614	0.801112	insig	1.41335	0.000945462	up	1.73142	0.0458072	up	-0.0622127	0.988362	insig	-0.32378	0.733851	insig	-0.238875	0.960512	insig	1.26226	0.00122204	down	0.34653	0.859796	insig	-0.615384	0.492359	insig	1.21813	0.113773	insig
-1.3995	0.0892679	insig	-0.926156	0.400045	insig	-0.418604	0.607894	insig	0.451885	0.925956	insig	-0.484649	0.952176	insig	-0.953459	0.350881	insig	PB.284	0.133241	0.969508	insig	0.307416	0.636881	insig	0.116468	0.886446	insig	0.18248	0.778515	insig	0.187034	0.603482	insig	0.0166665	0.986012	insig	-2.04035	3.7059e-05	up	-3.56749	2.26302e-08	up	-3.31687	3.18727e-09	up	-2.60773	1.00269e-07	up
-0.638378	0.0808325	insig	-1.23965	0.0377166	down	-0.818707	0.0287606	insig	-0.621465	0.73412	insig	-0.395872	0.929376	insig	0.204968	0.736084	insig	PB.286	0.439167	0.866236	insig	1.02244	0.0546647	insig	-0.308899	0.778167	insig	0.587099	0.452798	insig	1.32537	0.0291368	up	0.749458	0.615713	insig	2.72479	1.20929e-15	down	1.65148	0.000595925	down	0.422353	0.510974	insig	2.18466	6.17481e-05	down
-0.429875	0.0866173	insig	-0.441534	0.331772	insig	-0.424215	0.117853	insig	-0.0328035	0.989455	insig	0.0111007	0.997332	insig	0.0230099	0.952187	insig	PB.287	0.155778	0.917829	insig	0.550607	0.0517834	insig	0.464126	0.162529	insig	0.400897	0.336538	insig	0.0817986	0.82268	insig	-0.306299	0.608208	insig	1.73352	6.38368e-15	down	1.15413	1.35103e-06	down	0.700421	0.0551054	insig	0.814177	0.00111853	insig
0.836257	0.895876	insig	-2.01787	0.77092	insig	-1.98159	0.755757	insig	-2.87282	0.899024	insig	NA	NA	insig	2.84028	0.681069	insig	PB.288	-3.45629	0.00386621	down	-1.29347	0.0685439	insig	-3.25224	0.00146405	down	2.16645	0.108451	insig	1.95497	0.0581637	insig	-0.202404	0.962644	insig	-6.90767	4.94954e-08	up	-2.62662	0.413197	insig	-7.70032	8.36743e-07	up	-5.70165	0.0611923	insig
-0.380752	0.163727	insig	-0.659458	0.215887	insig	0.0796029	0.818518	insig	-0.298048	0.88151	insig	-0.711209	0.605526	insig	-0.435249	0.149754	insig	PB.289	0.202331	0.941999	insig	-0.268068	0.584474	insig	0.563386	0.183412	insig	-0.467328	0.533594	insig	-0.836955	0.00403062	insig	-0.355517	0.685958	insig	1.82789	1.85428e-12	down	1.24892	0.00214885	down	1.39794	0.00195799	down	1.31285	4.14535e-07	down
0.393601	0.343814	insig	0.512003	0.606247	insig	-0.728471	0.0274874	insig	0.100969	0.98636	insig	1.26813	0.564416	insig	1.14262	0.013488	up	PB.290	-0.113271	0.969508	insig	-0.326502	0.611906	insig	0.0445165	0.952632	insig	-0.208417	0.78086	insig	-0.37675	0.40165	insig	-0.153905	0.792095	insig	0.302772	0.4114	insig	0.814077	0.0663761	insig	1.1059	0.17932	insig	-0.498691	0.21642	insig
-1.68433	0.019793	down	-1.79488	0.0876442	insig	-1.60217	0.0413768	down	-0.131897	0.98009	insig	-0.156916	0.993405	insig	-0.0503098	0.969499	insig	PB.291	-1.62216	0.114607	insig	-0.589039	0.37377	insig	-1.67099	0.0388831	down	1.03819	0.313257	insig	1.07787	0.177175	insig	0.0545369	0.982156	insig	-0.412776	0.51991	insig	-0.462158	0.651644	insig	-1.65315	0.0298624	up	-0.371556	0.718079	insig
-1.95451	0.0298013	down	-3.02776	0.053129	insig	-4.94277	2.68795e-09	down	-1.09854	0.890784	insig	1.94693	0.818848	insig	3.02566	0.0177254	up	PB.292	-2.62331	0.282861	insig	-0.996918	0.296311	insig	-2.95376	0.0120851	down	1.62868	0.574171	insig	1.94886	0.207252	insig	0.332564	0.960176	insig	1.49943	0.0126632	down	2.18479	0.240137	insig	-0.562586	0.77858	insig	-0.519	0.789086	insig
-0.570513	0.0109009	insig	-0.908699	0.133522	insig	-1.03707	0.000906056	down	-0.358988	0.878655	insig	0.155171	0.984675	insig	0.492684	0.190727	insig	PB.297	-0.125709	0.921828	insig	-0.274616	0.302791	insig	-0.343052	0.0745178	insig	-0.14209	0.792814	insig	0.0636741	0.841445	insig	0.218326	0.65995	insig	-0.096758	0.596903	insig	-0.535821	0.0544288	insig	-0.770615	0.169805	insig	-0.819277	0.0247743	insig
-1.15591	0.0185638	down	-2.21677	0.0023204	down	0.30164	0.555688	insig	-1.08377	0.583887	insig	-2.48769	0.00123818	down	-1.42664	0.00183838	down	PB.300	0.977842	0.781832	insig	1.92415	0.0125577	up	2.04777	0.0104251	up	0.946992	0.570629	insig	-0.129937	0.902457	insig	-1.0562	0.494792	insig	2.60918	9.85113e-08	down	0.483058	0.643999	insig	-1.57149	0.0600477	insig	0.83296	0.155163	insig
-0.769737	0.0790978	insig	-1.38854	0.0191783	down	0.275784	0.598464	insig	-0.641104	0.627328	insig	-1.63803	0.00894947	down	-1.01728	0.00589389	down	PB.301	0.247791	0.932185	insig	0.0548982	0.95687	insig	-0.782303	0.250606	insig	-0.190763	0.86076	insig	0.831068	0.17671	insig	1.03334	0.155931	insig	0.735407	0.107117	insig	-0.27603	0.556022	insig	-0.744662	0.221089	insig	1.76228	6.60412e-06	down
-1.88669	2.46201e-10	down	-1.65679	0.030244	down	-0.523356	0.177649	insig	0.209268	0.953984	insig	-1.11128	0.595256	insig	-1.34076	0.000270257	down	PB.302	-0.186849	0.952769	insig	-0.367374	0.50714	insig	-1.80886	0.000185332	down	-0.174716	0.787243	insig	1.43621	1.84123e-14	up	1.62286	0.000168491	up	0.858179	0.0269782	insig	-0.836068	0.0431649	insig	-0.470116	0.550974	insig	2.11444	2.61027e-09	down
-1.33867	0.0132022	down	-2.18049	0.00221419	down	0.411696	0.50041	insig	-0.863198	0.625852	insig	-2.56301	0.000269012	down	-1.72338	0.000176699	down	PB.303	0.527087	0.922807	insig	1.336	0.20369	insig	1.30601	0.156973	insig	0.811142	0.658775	insig	0.0237781	0.985281	insig	-0.768445	0.641226	insig	1.71341	0.00425294	down	-0.146534	0.892902	insig	-1.84061	0.0365316	up	0.790974	0.1576	insig
-1.8002	0.00138482	down	-1.47945	0.186344	insig	1.48793	0.00805692	up	0.297094	0.957015	insig	-2.94899	0.029099	down	-3.25981	2.24208e-07	down	PB.304	-0.431381	0.939676	insig	-0.0342738	0.973072	insig	-1.51686	0.166607	insig	0.399795	0.848743	insig	1.47729	0.161252	insig	1.09807	0.655365	insig	1.1328	0.00485115	down	-0.230085	0.866892	insig	-0.357041	0.770119	insig	4.10225	2.37906e-06	down
0.528753	0.269811	insig	1.4084	0.237253	insig	-0.457982	0.372159	insig	0.85706	0.833104	insig	1.89677	0.418912	insig	1.01837	0.0478848	up	PB.305	-0.208886	0.859227	insig	0.179165	0.540615	insig	-0.224392	0.480938	insig	0.392439	0.379392	insig	0.398548	0.150731	insig	0.0199125	0.980109	insig	-2.20919	7.53892e-17	up	-1.46356	0.000633072	up	-1.02278	0.32714	insig	-2.47139	1.88559e-10	up
0.724637	0.100892	insig	-1.07175	0.1644	insig	-0.266782	0.727078	insig	-1.81422	0.0128355	down	-0.77216	0.779752	insig	1.01423	0.0537477	insig	PB.307	-0.614949	0.718499	insig	-0.0993132	0.904268	insig	-1.51185	0.00760697	down	0.524982	0.180705	insig	1.40908	3.26864e-14	up	0.896261	0.0165932	insig	-1.9507	8.05128e-05	up	-0.603463	0.0390006	insig	-2.96035	6.32786e-10	up	-0.729179	0.222893	insig
0.866146	0.00457061	insig	0.725377	0.357456	insig	-0.111305	0.723244	insig	-0.162924	0.964913	insig	0.868866	0.698308	insig	1.01093	0.00341345	up	PB.308	-0.329269	0.495391	insig	-0.579578	0.0162464	insig	-0.0736468	0.801642	insig	-0.244715	0.507919	insig	-0.510647	0.0197854	insig	-0.253951	0.402244	insig	-2.13254	1.76635e-31	up	-0.930403	0.00488323	insig	-0.869123	0.201624	insig	-2.20156	7.57664e-26	up
0.239748	0.576398	insig	0.327573	0.588855	insig	1.44283	6.13232e-06	up	0.0677939	0.975774	insig	-1.08688	0.0580783	insig	-1.17683	2.56889e-05	down	PB.309	0.134575	0.922807	insig	0.0032975	0.996761	insig	-0.414121	0.16877	insig	-0.124987	0.870409	insig	0.412745	0.322606	insig	0.550758	0.187194	insig	-0.865382	0.00315127	insig	-0.753803	0.0186017	insig	-0.583426	0.217313	insig	0.962305	0.000126656	insig
-2.72143	0.010207	down	-4.69258	0.00257208	down	0.0713494	0.946899	insig	-1.99372	0.753699	insig	-4.73895	0.00917358	down	-2.76826	0.00398761	down	PB.311	1.6899	0.848037	insig	2.95738	0.0579978	insig	2.25878	0.352295	insig	1.26077	0.552958	insig	0.691599	0.601158	insig	-0.553555	0.878541	insig	3.34054	0.0042506	down	-1.06522	0.598961	insig	-4.34855	0.00167892	up	1.12307	0.238713	insig
0.807123	0.0600997	insig	1.48676	0.181394	insig	-0.0275976	0.948869	insig	0.656959	0.883696	insig	1.54679	0.569847	insig	0.869689	0.0782408	insig	PB.312	-0.594036	0.213871	insig	-0.729038	0.0925669	insig	-0.0447622	0.909322	insig	-0.13069	0.885327	insig	-0.688941	0.113045	insig	-0.546261	0.142876	insig	-1.86276	3.25179e-15	up	-0.454716	0.373954	insig	0.31082	0.79557	insig	-1.87698	1.0479e-15	up
0.804757	0.00398519	insig	1.42799	0.00074943	up	1.65534	8.2147e-12	up	0.602354	0.542918	insig	-0.198412	0.952937	insig	-0.820848	0.000348365	insig	PB.316	0.239381	0.786203	insig	0.0555678	0.886711	insig	-0.759956	0.0051583	insig	-0.178113	0.687077	insig	0.810587	0.001406	insig	1.00056	0.0157177	up	1.49655	2.42787e-10	down	2.06636	6.06516e-17	down	2.82872	3.55937e-17	down	3.87924	3.08606e-82	down
-0.689323	0.0158014	insig	-1.0825	0.054787	insig	-1.24887	0.00642041	down	-0.413409	0.828659	insig	0.196758	0.980433	insig	0.586282	0.287151	insig	PB.317	-0.14558	0.958031	insig	-0.518955	0.150134	insig	-0.520945	0.206217	insig	-0.367335	0.515977	insig	-0.00357998	0.987489	insig	0.375486	0.526119	insig	1.74869	6.59212e-09	down	1.20869	0.000626291	down	1.14642	0.0154452	down	0.991083	0.0599828	insig
0.167675	0.630589	insig	0.514755	0.334272	insig	0.291752	0.460627	insig	0.327031	0.845073	insig	0.254303	0.952176	insig	-0.0951736	0.857929	insig	PB.318	0.261496	0.784214	insig	0.15945	0.652477	insig	0.365768	0.13521	insig	-0.0969906	0.874285	insig	-0.211042	0.456679	insig	-0.100984	0.87094	insig	-0.949307	2.31315e-05	insig	-1.03685	0.000514168	up	-0.633646	0.144851	insig	-1.055	0.000923738	up
2.63901	0.66526	insig	NA	NA	insig	NA	NA	insig	-2.86285	0.899121	insig	NA	NA	insig	2.83879	0.681079	insig	PB.320	-2.48863	0.0789511	insig	-1.50624	0.0365238	down	-2.64492	0.00141535	down	0.989503	0.662487	insig	1.13299	0.347374	insig	0.156297	0.969879	insig	-7.88024	2.62319e-08	up	-2.73603	0.272316	insig	-6.61132	0.000473817	up	-5.43122	0.0753048	insig
-0.105929	0.750076	insig	0.367671	0.380383	insig	0.361048	0.462196	insig	0.453381	0.412044	insig	0.035532	0.993405	insig	-0.437787	0.375976	insig	PB.322	0.127106	0.962981	insig	0.258022	0.623335	insig	-0.142557	0.823583	insig	0.138165	0.729455	insig	0.39664	0.108662	insig	0.271021	0.532355	insig	0.530492	0.136374	insig	0.303542	0.161313	insig	0.598669	0.0294821	insig	1.00076	0.0304195	down
-0.452356	0.830889	insig	-1.04543	0.791508	insig	0.928276	0.588768	insig	-0.608885	0.965934	insig	-1.93685	0.893304	insig	-1.35945	0.46359	insig	PB.323	-0.00710771	0.998971	insig	0.308269	0.613859	insig	-0.868035	0.166062	insig	0.32162	0.540953	insig	1.17123	0.000209167	up	0.863206	0.15532	insig	-6.42785	2.79379e-26	up	-6.87527	3.18698e-27	up	-7.84045	3.15857e-17	up	-4.67214	3.704e-09	up
1.19033	0.458612	insig	3.38387	0.0380145	up	2.01816	0.0999502	insig	2.17204	0.541513	insig	1.39632	0.798326	insig	-0.799203	0.550598	insig	PB.325	-0.551866	0.896799	insig	-0.610735	0.43651	insig	0.306266	0.639063	insig	-0.0579499	0.981684	insig	-0.921855	0.193095	insig	-0.85094	0.612549	insig	-4.14039	1.41209e-08	up	-2.38703	0.049479	up	-0.186457	0.903247	insig	-2.45786	9.09315e-05	up
0.662848	0.0687838	insig	0.838051	0.129929	insig	0.827138	0.0649855	insig	0.152626	0.952538	insig	0.0403029	0.993405	insig	-0.130456	0.867956	insig	PB.326	-0.309912	0.758016	insig	-0.116865	0.773673	insig	0.186891	0.658375	insig	0.199577	0.613055	insig	-0.308409	0.220898	insig	-0.495949	0.292595	insig	-1.00926	0.000118195	up	-0.0310095	0.951525	insig	-0.0977594	0.863481	insig	-0.402557	0.435814	insig
0.173729	0.721571	insig	0.32756	0.575161	insig	-0.0742636	0.901706	insig	0.132942	0.939293	insig	0.432288	0.821309	insig	0.277894	0.584739	insig	PB.327	-0.15866	0.942475	insig	-0.469769	0.262622	insig	0.0564461	0.928243	insig	-0.304558	0.487567	insig	-0.530923	0.0690212	insig	-0.214024	0.739692	insig	-1.04481	0.00343547	up	-0.704675	0.0434721	insig	-0.287015	0.427481	insig	-1.20544	0.0010102	up
-0.437988	0.121236	insig	-0.380478	0.328872	insig	-0.109499	0.759441	insig	0.0365686	0.979297	insig	-0.241167	0.850646	insig	-0.300116	0.250465	insig	PB.328	-0.112824	0.947478	insig	0.24861	0.205199	insig	-0.296305	0.0734324	insig	0.368304	0.425606	insig	0.539975	0.00101134	insig	0.183739	0.754866	insig	-0.499649	0.0261725	insig	-0.818968	0.00955173	insig	-1.1694	3.04475e-08	up	-0.343639	0.09922	insig
0.906164	0.00333612	insig	1.03069	0.385337	insig	-0.334004	0.227665	insig	0.103484	0.989455	insig	1.3984	0.642387	insig	1.27129	5.12623e-05	up	PB.329	-0.283916	0.745363	insig	-0.596661	0.0834527	insig	0.0637739	0.882793	insig	-0.306973	0.617852	insig	-0.665632	0.0828289	insig	-0.34784	0.498723	insig	-1.93282	1.15414e-21	up	-0.736519	0.0361168	insig	-0.345471	0.771937	insig	-2.35851	5.77514e-18	up
0.572452	0.325214	insig	1.9777	0.0172917	up	0.59045	0.346948	insig	1.38056	0.418631	insig	1.41562	0.385258	insig	0.0175795	0.984169	insig	PB.330	0.742683	0.200843	insig	0.992053	0.0013848	insig	1.47116	0.00115434	up	0.253748	0.694907	insig	-0.48396	0.330243	insig	-0.727025	0.328152	insig	0.571534	0.213791	insig	0.410872	0.445094	insig	1.51476	0.0233801	down	-0.337775	0.580072	insig
-0.165231	0.712029	insig	-0.189249	0.757224	insig	-0.109585	0.800548	insig	-0.0433527	0.989455	insig	-0.0486774	0.993405	insig	-0.0288135	0.963188	insig	PB.331	0.207544	0.918999	insig	0.222215	0.629589	insig	-0.0550759	0.92825	insig	0.0204153	0.97705	insig	0.272846	0.340019	insig	0.265029	0.688998	insig	-0.7619	0.0193341	insig	-1.12807	0.00215236	up	-1.21349	0.000431981	up	-0.847454	0.00386781	insig
-0.275651	0.32883	insig	0.0790687	0.89003	insig	0.188557	0.639577	insig	0.334629	0.792017	insig	-0.0813244	0.992119	insig	-0.436549	0.225588	insig	PB.332	0.355187	0.756101	insig	0.52009	0.16679	insig	0.331773	0.586909	insig	0.171913	0.761241	insig	0.183816	0.720474	insig	0.0235008	0.982156	insig	1.98413	1.41999e-14	down	1.35859	1.51425e-07	down	1.5012	2.16419e-05	down	1.80888	1.53866e-05	down
0.0884716	0.725116	insig	-0.59426	0.0868281	insig	-0.628785	0.179043	insig	-0.703277	0.205074	insig	0.0641625	0.993405	insig	0.742872	0.137173	insig	PB.333	-0.0173842	0.989546	insig	0.150419	0.470636	insig	-0.522575	0.0188065	insig	0.173484	0.532265	insig	0.668003	0.000882891	insig	0.507941	0.139235	insig	-0.755105	1.20482e-06	insig	-0.642752	0.00117366	insig	-1.53813	2.14153e-08	up	-0.887631	0.0971499	insig
0.0956287	0.813022	insig	-0.016164	0.98138	insig	-0.285471	0.456902	insig	-0.132823	0.931513	insig	0.297806	0.88724	insig	0.409411	0.146484	insig	PB.335	-0.104863	0.942668	insig	0.0942819	0.786979	insig	0.228083	0.437773	insig	0.204097	0.591315	insig	-0.138552	0.562101	insig	-0.329832	0.444716	insig	-1.07289	4.28034e-05	up	-0.864763	0.000561375	insig	-1.22301	3.05819e-05	up	-1.61569	3.498e-12	up
0.585705	0.0387193	insig	0.553657	0.619393	insig	-0.173165	0.54173	insig	-0.0533226	0.992855	insig	0.758913	0.858606	insig	0.78939	0.00444285	insig	PB.337	-0.0275021	0.994202	insig	0.000402126	0.99973	insig	0.289613	0.606087	insig	0.0331006	0.962618	insig	-0.293454	0.271813	insig	-0.313902	0.577839	insig	-0.61782	0.0664494	insig	0.00187144	0.997072	insig	-0.108237	0.919184	insig	-1.11135	8.18896e-09	up
0.237311	0.70012	insig	0.449495	0.596612	insig	-0.302173	0.670062	insig	0.191517	0.946644	insig	0.781846	0.777199	insig	0.568981	0.393876	insig	PB.339	-0.238365	0.922398	insig	-0.243415	0.701425	insig	-0.31197	0.631569	insig	0.00351447	0.996952	insig	0.0647572	0.897903	insig	0.0757056	0.925259	insig	-3.34615	1.83335e-18	up	-2.86345	3.33961e-17	up	-2.69531	1.09594e-08	up	-3.36893	4.64562e-14	up
0.664676	0.455924	insig	0.87864	0.538363	insig	0.389314	0.723758	insig	0.193402	0.965456	insig	0.517457	0.945217	insig	0.303988	0.699197	insig	PB.340	0.324795	0.745363	insig	0.748792	0.00969186	insig	0.639558	0.142466	insig	0.42949	0.333826	insig	0.104232	0.824755	insig	-0.313471	0.700656	insig	-2.24993	0.000153127	up	-1.90085	3.30956e-06	up	-2.16075	0.00222335	up	-2.52695	6.50515e-07	up
1.81939	3.0963e-11	up	2.70665	1.28355e-11	up	2.55748	1.72521e-44	up	0.866711	0.443264	insig	0.176158	0.970514	insig	-0.711599	0.0315157	insig	PB.343	-0.339182	0.891153	insig	-0.241132	0.743728	insig	0.0779318	0.918191	insig	0.100996	0.920255	insig	-0.325296	0.471126	insig	-0.411313	0.444723	insig	-1.50521	3.30129e-05	up	0.656785	0.105594	insig	1.39992	0.0049547	down	0.942743	1.86613e-06	insig
-0.123008	0.715146	insig	0.27695	0.762761	insig	-0.800449	0.0666819	insig	0.378118	0.900854	insig	1.1067	0.603497	insig	0.707153	0.167786	insig	PB.344	-0.0184247	0.991017	insig	-0.115406	0.756518	insig	0.380245	0.115809	insig	-0.0911951	0.859453	insig	-0.500393	0.0377183	insig	-0.396654	0.266305	insig	-0.210217	0.328124	insig	-0.308112	0.338955	insig	0.14638	0.859806	insig	-1.41782	0.0027493	up
-0.398254	0.174543	insig	-0.452382	0.31606	insig	-0.35922	0.208594	insig	-0.0739472	0.968003	insig	-0.0636786	0.992422	insig	-0.0126397	0.975228	insig	PB.345	-0.178246	0.781832	insig	-0.313099	0.0913267	insig	-0.62639	0.000313332	insig	-0.129594	0.676652	insig	0.30831	0.081475	insig	0.450702	0.185256	insig	1.52203	1.21338e-12	down	1.30759	5.0085e-08	down	1.34355	7.54942e-06	down	1.7576	2.53346e-23	down
-0.473671	0.156828	insig	-1.09765	0.0146567	down	-0.892468	0.0138435	insig	-0.64477	0.447731	insig	-0.174493	0.968817	insig	0.446559	0.234481	insig	PB.346	0.00362574	0.998971	insig	-0.472207	0.0976863	insig	-0.38798	0.266624	insig	-0.470287	0.165963	insig	-0.08966	0.732529	insig	0.393339	0.383477	insig	1.2797	7.36383e-06	down	0.808433	0.00637209	insig	0.616098	0.0707756	insig	0.745586	0.0295469	insig
0.663139	0.00870609	insig	0.281926	0.807579	insig	-0.546268	0.0739453	insig	-0.401665	0.917801	insig	0.861836	0.805536	insig	1.2386	0.000103129	up	PB.347	0.455566	0.261868	insig	0.287293	0.310251	insig	0.540177	0.0165388	insig	-0.163705	0.667238	insig	-0.258223	0.253177	insig	-0.082406	0.837048	insig	-0.673378	0.000465485	insig	-0.459765	0.0944255	insig	-0.71807	0.420135	insig	-1.78799	2.68617e-09	up
NA	NA	insig	NA	NA	insig	NA	NA	insig	NA	NA	insig	NA	NA	insig	NA	NA	insig	PB.348	-0.34857	0.905945	insig	0.288445	0.696222	insig	-0.109409	0.897432	insig	0.643631	0.490944	insig	0.393197	0.53155	insig	-0.237219	0.884547	insig	-7.82695	3.21854e-08	up	-7.70451	3.39474e-05	up	-8.35364	1.52439e-08	up	-7.90987	1.15091e-06	up
-0.488085	0.0219413	insig	-0.495774	0.169036	insig	-0.76926	0.00150414	insig	-0.028213	0.989455	insig	0.302708	0.858535	insig	0.30849	0.251027	insig	PB.349	0.139423	0.918999	insig	0.517244	0.0457033	insig	0.103346	0.772937	insig	0.384689	0.132628	insig	0.409499	0.0230752	insig	0.0378232	0.932687	insig	-0.198585	0.403858	insig	-0.819722	1.22503e-05	insig	-1.25178	7.97844e-06	up	-1.10088	2.94229e-06	up
0.464913	0.178941	insig	0.139701	0.90391	insig	0.0417052	0.946552	insig	-0.346133	0.919463	insig	0.126132	0.992998	insig	0.449217	0.330989	insig	PB.350	-0.887511	0.0856792	insig	0.00415242	0.994591	insig	-1.51268	3.01353e-06	down	0.898038	0.000199109	insig	1.512	8.18544e-23	up	0.626488	0.120319	insig	-2.38659	6.04885e-15	up	-1.02588	0.000115579	up	-2.29241	0.000464241	up	-0.858421	0.042052	insig
-0.699436	0.0395897	insig	-0.462414	0.619317	insig	-0.627979	0.105635	insig	0.216329	0.951968	insig	0.195105	0.984675	insig	-0.0435776	0.94986	insig	PB.351	1.06407	0.0166594	up	0.597066	0.0848055	insig	0.21236	0.568419	insig	-0.459778	0.441738	insig	0.379562	0.292755	insig	0.851446	0.0676697	insig	3.58842	1.03791e-43	down	1.82943	1.7929e-07	down	2.49036	0.000180134	down	2.71734	3.74573e-15	down
0.670701	0.0275291	insig	0.834991	0.175142	insig	-0.413941	0.121306	insig	0.142485	0.96095	insig	1.28106	0.186477	insig	1.11737	0.00067361	up	PB.352	-0.382515	0.467023	insig	-0.712042	0.05326	insig	0.108353	0.720991	insig	-0.325485	0.618054	insig	-0.825239	0.0268095	insig	-0.488187	0.192347	insig	-0.377237	0.0594853	insig	0.682961	0.0479589	insig	1.13015	0.0521497	insig	-0.930047	5.08758e-05	insig
-0.53757	0.045028	insig	-0.476281	0.434611	insig	-0.193563	0.615499	insig	0.0410049	0.990487	insig	-0.255382	0.955822	insig	-0.318709	0.40171	insig	PB.355	0.158721	0.86325	insig	0.375325	0.00986902	insig	-0.50984	0.000111649	insig	0.221634	0.537062	insig	0.880244	5.16196e-12	insig	0.672101	0.0372567	insig	-0.867448	9.50511e-06	insig	-1.55787	5.72877e-10	up	-1.75826	5.21167e-05	up	-0.580429	0.0733132	insig
0.633439	0.460766	insig	0.964755	0.397142	insig	-0.0142058	0.990288	insig	0.308316	0.944154	insig	1.001	0.796333	insig	0.677085	0.503012	insig	PB.357	0.285061	0.952769	insig	0.820564	0.337496	insig	1.28654	0.0911138	insig	0.538984	0.685992	insig	-0.470505	0.522724	insig	-0.996803	0.449427	insig	-0.15201	0.845936	insig	0.202285	0.850025	insig	-0.0507269	0.962213	insig	-1.48374	0.0311122	up
0.0278689	0.94942	insig	0.242847	0.582131	insig	0.0647369	0.906121	insig	0.195594	0.884686	insig	0.207427	0.958276	insig	-0.00982	0.988065	insig	PB.358	-0.107936	0.975266	insig	-0.519778	0.254781	insig	0.513177	0.279034	insig	-0.407657	0.618054	insig	-1.03717	0.00139985	down	-0.615659	0.434613	insig	0.791096	0.0133172	insig	0.932915	0.0376426	insig	1.51377	2.10717e-07	down	0.309448	0.504923	insig
-0.540014	0.0889608	insig	-0.754681	0.291045	insig	-0.801016	0.00499586	insig	-0.232985	0.935739	insig	0.0755342	0.993405	insig	0.285726	0.392199	insig	PB.360	0.683724	0.189079	insig	-0.0875941	0.829704	insig	-0.391299	0.183147	insig	-0.763983	0.0427814	insig	0.299115	0.255018	insig	1.07541	0.00872927	up	2.50264	1.44767e-24	down	1.28388	7.855e-05	down	1.79796	0.00135551	down	2.0612	4.56462e-25	down
-0.164845	0.575995	insig	0.0605404	0.925106	insig	0.309944	0.259958	insig	0.204056	0.909995	insig	-0.220058	0.952937	insig	-0.445926	0.0873931	insig	PB.362	-0.129802	0.891153	insig	0.234798	0.349445	insig	0.198897	0.372228	insig	0.370668	0.19957	insig	0.0311882	0.903741	insig	-0.326301	0.316859	insig	-1.2141	2.63628e-10	up	-1.24224	1.25471e-08	up	-1.42992	0.00011213	up	-1.13218	3.09491e-08	up
-0.0703797	0.882408	insig	-0.105791	0.866451	insig	-0.220848	0.64436	insig	-0.0551667	0.977437	insig	0.145962	0.976989	insig	0.178341	0.721657	insig	PB.364	0.292149	0.894644	insig	-0.489526	0.436076	insig	0.411766	0.487745	insig	-0.776282	0.333319	insig	-0.906377	0.0999286	insig	-0.116908	0.924006	insig	0.725072	0.0447313	insig	0.366649	0.433216	insig	1.06821	0.0218173	down	0.0595688	0.902575	insig
-0.38309	0.583092	insig	0.733196	0.479205	insig	0.571719	0.35612	insig	1.09816	0.625852	insig	0.187261	0.984675	insig	-0.931857	0.0923044	insig	PB.365	0.459726	0.769101	insig	1.53346	0.00021629	up	0.552091	0.336276	insig	1.07985	0.00463508	up	0.976241	0.00375572	insig	-0.0912167	0.896936	insig	0.607893	0.257505	insig	-0.233283	0.711518	insig	-0.235435	0.783758	insig	0.59463	0.128932	insig
-0.488364	0.0284099	insig	-0.720801	0.0677582	insig	-0.480557	0.0563137	insig	-0.253288	0.869086	insig	-0.212264	0.948139	insig	0.0190752	0.967695	insig	PB.366	-0.0452383	0.979758	insig	-0.419984	0.135496	insig	-0.16026	0.620022	insig	-0.370862	0.394213	insig	-0.265014	0.387058	insig	0.118887	0.84923	insig	1.20618	1.64626e-12	down	0.768933	0.00396518	insig	0.865927	0.02082	insig	0.855479	0.00233934	insig
0.132661	0.696334	insig	0.550222	0.216691	insig	0.518252	0.104412	insig	0.396226	0.63622	insig	0.0603042	0.992802	insig	-0.356644	0.14185	insig	PB.369	-0.00870925	0.997951	insig	0.320491	0.161134	insig	-0.20714	0.603001	insig	0.335537	0.303307	insig	0.522732	0.0552909	insig	0.198188	0.74849	insig	-1.08601	6.94349e-06	up	-0.937955	7.29245e-05	insig	-0.897023	0.00151411	insig	-0.39079	0.234717	insig
-1.10043	0.0036761	down	-1.44867	0.00589023	down	-1.51427	8.76715e-06	down	-0.367496	0.852412	insig	0.0947553	0.991271	insig	0.43837	0.307273	insig	PB.370	0.368128	0.557823	insig	-0.342279	0.420982	insig	0.136233	0.748233	insig	-0.704754	0.175004	insig	-0.483228	0.273079	insig	0.232648	0.734319	insig	2.91361	2.67614e-25	down	1.4495	5.92869e-05	down	1.7675	0.000115325	down	1.23247	0.0001526	down
0.277429	0.414746	insig	0.199141	0.636556	insig	-0.847851	0.032413	insig	-0.100717	0.955191	insig	1.07627	0.177943	insig	1.15485	0.0079505	up	PB.372	-0.881873	0.10078	insig	-0.319472	0.47699	insig	-0.458465	0.216039	insig	0.569355	0.25536	insig	0.134873	0.713028	insig	-0.419843	0.355347	insig	-1.3645	3.17449e-07	up	-0.197029	0.634621	insig	-0.886952	0.0101509	insig	-1.77998	1.45891e-05	up
-1.33035	7.55888e-05	down	-1.92293	0.000403399	down	-1.39783	0.000715264	down	-0.612303	0.745649	insig	-0.496556	0.887733	insig	0.0909297	0.91262	insig	PB.373	-0.2835	0.822147	insig	-0.645247	0.0461745	insig	-0.924443	0.00315287	insig	-0.355777	0.472565	insig	0.273787	0.372044	insig	0.642429	0.156027	insig	2.55943	1.42051e-23	down	1.51759	5.3985e-05	down	1.2432	0.0174221	down	2.05762	9.65054e-06	down
-0.0455139	0.890142	insig	-0.408687	0.386967	insig	0.0569535	0.902134	insig	-0.38308	0.7345	insig	-0.436098	0.830372	insig	-0.0760068	0.886347	insig	PB.375	0.146904	0.92827	insig	0.407504	0.379277	insig	-0.611844	0.0635077	insig	0.266455	0.694907	insig	1.01412	0.00888321	up	0.761581	0.0208912	insig	-1.90411	4.81604e-16	up	-2.09031	5.24449e-25	up	-2.75873	5.0522e-11	up	-1.26543	0.000319942	up
1.91454	1.22877e-05	up	3.36431	4.35743e-06	up	3.43615	4.99595e-23	up	1.42756	0.437007	insig	-0.0410561	0.994259	insig	-1.48725	0.00178179	down	PB.376	1.06731	0.222583	insig	0.0600149	0.946616	insig	0.731173	0.230595	insig	-1.00413	0.0752882	insig	-0.677021	0.136514	insig	0.340322	0.642011	insig	-1.1409	0.00928142	up	-0.290508	0.616116	insig	2.11666	0.00302129	down	1.52992	0.00013222	down
1.62052	6.29299e-05	up	1.7665	0.0512316	insig	2.39459	1.22541e-06	up	0.12556	0.977437	insig	-0.601024	0.910395	insig	-0.749394	0.145872	insig	PB.377	3.19522	3.36038e-08	up	0.760621	0.320644	insig	1.40543	0.0286886	up	-2.42981	2.07453e-06	down	-0.651382	0.258071	insig	1.7907	6.55031e-08	up	3.31818	4.42069e-12	down	1.74572	3.02647e-09	down	4.28463	2.5088e-08	down	4.27711	6.61509e-19	down
0.0157874	0.993055	insig	0.92681	0.483329	insig	-0.0694111	0.954757	insig	0.88691	0.842324	insig	1.02285	0.779752	insig	0.123833	0.94439	insig	PB.382	-0.653686	0.711351	insig	-0.101931	0.898423	insig	-0.821393	0.164403	insig	0.562423	0.428096	insig	0.715685	0.0204625	insig	0.165096	0.865427	insig	-4.75214	1.02627e-19	up	-4.07893	1.09363e-07	up	-3.76756	1.61984e-09	up	-4.02874	8.40044e-25	up
1.4721	0.313195	insig	1.9485	0.31125	insig	0.879244	0.638063	insig	0.456563	0.925569	insig	1.09979	0.826962	insig	0.628172	0.644449	insig	PB.383	-0.582145	0.841123	insig	-0.230535	0.821594	insig	0.0831629	0.944547	insig	0.357277	0.780515	insig	-0.317839	0.685751	insig	-0.663233	0.637214	insig	-2.89387	0.00417278	up	-0.83481	0.407753	insig	-0.758549	0.423252	insig	-2.1318	0.014776	up
-0.779361	0.0114531	insig	-1.24663	0.0438796	down	-0.768362	0.0271558	insig	-0.486214	0.828005	insig	-0.444586	0.904264	insig	0.0153722	0.979894	insig	PB.384	0.0573518	0.988456	insig	0.159207	0.824005	insig	-1.19808	0.0336902	down	0.106612	0.842825	insig	1.35126	1.25423e-08	up	1.25788	0.000974678	up	1.37393	0.000399727	down	0.541631	0.114946	insig	-0.0687055	0.92337	insig	1.77295	6.35805e-07	down
-0.756336	0.00623605	insig	-0.563218	0.498243	insig	-0.35343	0.219859	insig	0.172969	0.959553	insig	-0.183452	0.984675	insig	-0.378191	0.319174	insig	PB.385	0.125185	0.956792	insig	-0.324824	0.483004	insig	-0.276779	0.521386	insig	-0.443618	0.433733	insig	-0.053563	0.898816	insig	0.402905	0.406496	insig	1.39426	2.9693e-08	down	0.517368	0.157306	insig	1.11715	0.107789	insig	1.28729	1.85669e-06	down
-1.65174	0.000311385	down	-1.31141	0.0567029	insig	-1.60151	0.00114064	down	0.320255	0.899633	insig	0.316739	0.946319	insig	-0.0264002	0.973976	insig	PB.386	0.0162165	0.998514	insig	-1.12601	0.0116316	down	-1.11632	0.0490288	down	-1.13201	0.0821614	insig	-0.0133802	0.982398	insig	1.12758	0.135491	insig	-1.34334	0.00305527	up	-3.00654	1.4331e-09	up	-1.57343	0.0010184	up	-1.8577	0.000124481	up
-0.633531	0.0209616	insig	-0.983249	0.0499367	insig	-0.641723	0.0862353	insig	-0.369825	0.848144	insig	-0.31372	0.94289	insig	0.0326672	0.96419	insig	PB.387	0.374272	0.768353	insig	0.107021	0.848401	insig	-0.0187074	0.974502	insig	-0.26209	0.579504	insig	0.12007	0.725112	insig	0.395348	0.350321	insig	1.64786	8.46258e-10	down	0.644917	0.0443675	insig	0.518265	0.311187	insig	0.995477	0.0179536	insig
0.368299	0.195506	insig	0.518049	0.199062	insig	-0.012429	0.982629	insig	0.128842	0.928152	insig	0.560324	0.740002	insig	0.411389	0.383852	insig	PB.388	-0.351454	0.518338	insig	-0.391828	0.104614	insig	-0.519896	0.14199	insig	-0.0344511	0.949136	insig	0.123334	0.751575	insig	0.171395	0.814293	insig	-1.01034	4.2338e-06	up	-0.28499	0.32221	insig	-0.141855	0.687005	insig	-0.537982	0.276706	insig
NA	NA	insig	NA	NA	insig	NA	NA	insig	NA	NA	insig	NA	NA	insig	NA	NA	insig	PB.389	-0.123098	0.972983	insig	-0.99544	0.120593	insig	0.0478809	0.959922	insig	-0.866671	0.367094	insig	-1.04823	0.131526	insig	-0.167773	0.918858	insig	-7.92363	1.69624e-08	up	-8.02514	3.86048e-06	up	-7.16619	2.01354e-05	up	-8.16573	3.85301e-07	up
-0.624947	0.227116	insig	-1.45631	0.169382	insig	-0.944213	0.0777557	insig	-0.848212	0.786558	insig	-0.475888	0.948545	insig	0.344898	0.480632	insig	PB.390	-0.974348	0.437638	insig	-1.13523	0.0774631	insig	-1.15931	0.0783776	insig	-0.153374	0.907958	insig	0.0203377	0.981196	insig	0.187669	0.885978	insig	1.14155	0.0256529	down	1.49724	0.000802896	down	0.783665	0.443854	insig	1.32645	0.000903406	down
NA	NA	insig	NA	NA	insig	NA	NA	insig	NA	NA	insig	NA	NA	insig	NA	NA	insig	PB.392	-0.00776026	0.998971	insig	-0.949575	0.0592938	insig	-1.63667	0.000770138	down	-0.93747	0.0307088	insig	0.681157	0.0928896	insig	1.63153	4.07882e-07	up	-12.1161	2.80401e-21	up	-12.3347	2.32097e-22	up	-11.405	1.45221e-17	up	-10.6719	2.9645e-16	up
-4.90769	3.41314e-17	down	1.05331	0.43809	insig	0.381718	0.890916	insig	5.94203	5.79399e-10	up	0.707295	0.96437	insig	-5.2693	NA	insig	PB.393	2.62175	0.000668274	up	-0.526801	0.565817	insig	1.42292	0.0691707	insig	-3.14115	7.6963e-09	down	-1.95514	0.000667204	down	1.19654	0.0765871	insig	2.01442	0.0398115	down	-5.50919	1.14571e-41	up	3.55478	9.11186e-05	down	0.957696	NA	insig
-1.03033	0.00675653	down	-0.580123	0.577312	insig	-1.09664	0.00219198	down	0.431	0.909713	insig	0.54255	0.922119	insig	0.0894695	0.899393	insig	PB.394	-0.151158	0.914439	insig	-0.370655	0.135817	insig	-0.247342	0.404018	insig	-0.213429	0.561892	insig	-0.128345	0.546564	insig	0.0976826	0.857172	insig	1.57826	1.42023e-09	down	0.702669	0.0909005	insig	1.32956	0.0941035	insig	0.697062	0.052086	insig
0.698664	0.0290586	insig	-0.266016	0.811059	insig	1.01728	0.0271965	up	-0.984949	0.659914	insig	-1.2455	0.597278	insig	-0.285219	0.6557	insig	PB.395	1.03373	0.737012	insig	-0.775673	0.563841	insig	-1.15706	0.437599	insig	-1.80346	0.283873	insig	0.376512	0.835961	insig	2.2018	0.240251	insig	2.88876	1.59162e-11	down	2.55901	8.08694e-05	down	3.36131	0.000323733	down	5.02854	9.71163e-11	down
0.377563	0.232734	insig	0.379554	0.398207	insig	0.442464	0.152196	insig	-0.0190773	0.992692	insig	-0.033623	0.993405	insig	-0.0361346	0.931572	insig	PB.396	0.292615	0.880015	insig	0.806088	0.073889	insig	0.578681	0.155435	insig	0.519156	0.494425	insig	0.222439	0.663208	insig	-0.282097	0.725647	insig	1.00438	0.000859062	down	1.09467	0.00172121	down	0.537345	0.23734	insig	0.838358	0.000223566	insig
0.613088	0.630863	insig	0.11065	0.961912	insig	-0.174728	0.910657	insig	-0.523034	0.909995	insig	0.316282	0.979855	insig	0.817928	0.315613	insig	PB.397	1.64112	0.00795354	up	0.516889	0.309192	insig	0.614074	0.0653239	insig	-1.12075	0.142033	insig	-0.102207	0.86302	insig	1.03331	0.156011	insig	-2.68832	0.000570021	up	-3.71544	3.86699e-10	up	-3.14136	4.27793e-05	up	-3.51355	6.40045e-24	up
0.0618549	0.84054	insig	0.133799	0.843694	insig	-0.0216527	0.947804	insig	0.0518402	0.988601	insig	0.184582	0.972219	insig	0.110009	0.736747	insig	PB.398	0.170178	0.815462	insig	0.79489	7.47481e-06	insig	0.357995	0.0680669	insig	0.630805	0.00611497	insig	0.432131	0.0229842	insig	-0.185675	0.661343	insig	-0.461365	0.0104495	insig	-0.563469	0.0197352	insig	-1.16498	0.00668282	up	-0.871137	1.16189e-05	insig
-0.789073	0.00595558	insig	-0.818811	0.181268	insig	-0.993843	0.000356611	insig	-0.0493151	0.989455	insig	0.205069	0.970514	insig	0.232172	0.381542	insig	PB.399	0.338418	0.818795	insig	-0.292377	0.554836	insig	-0.586313	0.200024	insig	-0.625423	0.0988606	insig	0.288157	0.378331	insig	0.925975	0.00881143	insig	2.4926	1.16749e-15	down	1.36829	2.39666e-08	down	1.92697	7.57752e-05	down	2.05206	1.35137e-23	down
0.16438	0.516926	insig	0.100228	0.794859	insig	-0.105098	0.729302	insig	-0.0851477	0.937867	insig	0.234379	0.871678	insig	0.298373	0.224384	insig	PB.401	-0.253101	0.859875	insig	-0.569157	0.120761	insig	0.414245	0.273571	insig	-0.311565	0.532824	insig	-0.988943	0.000155063	insig	-0.665657	0.0826434	insig	1.53845	2.0692e-10	down	1.96181	5.61706e-19	down	2.16841	2.6185e-16	down	0.988305	9.56236e-07	insig
0.258963	0.341423	insig	0.749344	0.0535928	insig	0.0150134	0.97289	insig	0.469978	0.581761	insig	0.763494	0.377939	insig	0.272638	0.466756	insig	PB.402	-0.0817491	0.968355	insig	-0.669846	0.0847598	insig	0.463107	0.100885	insig	-0.584486	0.326132	insig	-1.13783	0.00222251	down	-0.541764	0.20883	insig	0.0878916	0.73511	insig	0.433791	0.134127	insig	1.46604	0.000371677	down	-0.392463	0.24425	insig
-0.418249	0.123169	insig	-0.759608	0.195189	insig	-0.812169	0.00258521	insig	-0.362052	0.860478	insig	0.0805248	0.993405	insig	0.422836	0.154588	insig	PB.403	0.00496081	0.998971	insig	0.146892	0.86191	insig	0.174692	0.851233	insig	0.151591	0.902011	insig	-0.0320144	0.983252	insig	-0.165893	0.895437	insig	-1.47667	1.6113e-08	up	-1.89448	1.93577e-12	up	-2.42385	0.000117919	up	-2.49897	4.34332e-05	up
2.29315	0.0138679	up	6.46336	0.0192634	up	2.60504	0.00317393	up	4.14876	0.537765	insig	3.89119	0.607208	insig	-0.273081	0.859251	insig	PB.404	1.63664	0.732532	insig	2.54477	0.00279701	up	3.87089	3.09942e-06	up	0.910659	0.801338	insig	-1.3293	0.0237196	down	-2.22545	0.51458	insig	-2.25556	0.0151511	up	-1.59058	0.300392	insig	1.61806	0.57367	insig	-3.55427	4.32958e-07	up
-0.660805	0.00557118	insig	-1.15904	0.014378	down	-0.814529	0.00447832	insig	-0.517997	0.717669	insig	-0.313544	0.930183	insig	0.180657	0.677738	insig	PB.405	-0.260401	0.810619	insig	-0.282149	0.402385	insig	-0.373293	0.285449	insig	-0.0168324	0.976083	insig	0.0857169	0.75855	insig	0.115959	0.829929	insig	0.575666	0.0133565	insig	0.180197	0.549864	insig	-0.339209	0.500262	insig	0.103972	0.786008	insig
-0.830954	0.0423528	insig	-0.590547	0.541351	insig	-1.37925	0.000239362	down	0.219543	0.951968	insig	0.817253	0.74952	insig	0.57647	0.0767	insig	PB.406	1.37657	0.0725542	insig	0.168865	0.835085	insig	0.789979	0.320987	insig	-1.20285	0.0041633	down	-0.627389	0.272987	insig	0.585639	0.514095	insig	5.55475	4.6404e-44	down	3.35049	1.06415e-24	down	4.75675	6.63659e-14	down	3.35298	1.93831e-16	down
-0.937663	0.00124864	insig	-0.274877	0.803159	insig	-0.524022	0.0633065	insig	0.642831	0.831531	insig	0.275756	0.974346	insig	-0.386982	0.13515	insig	PB.407	-0.0375226	0.989546	insig	-0.412494	0.43658	insig	-0.237876	0.774507	insig	-0.370129	0.599342	insig	-0.180058	0.809233	insig	0.201015	0.87094	insig	2.20306	1.72517e-14	down	1.3068	2.1586e-05	down	2.30273	0.00228139	down	1.88631	2.18431e-05	down
-0.991026	0.0016729	insig	-0.931811	0.224104	insig	-1.03878	0.000406385	down	0.0388764	0.993417	insig	0.136932	0.989854	insig	0.0759068	0.847756	insig	PB.408	0.815023	0.0543804	insig	0.284162	0.317941	insig	-0.967412	0.000463905	insig	-0.523461	0.208148	insig	1.24699	6.29941e-07	up	1.78217	4.25568e-06	up	2.20387	1.75133e-17	down	0.404268	0.253606	insig	0.950863	0.14818	insig	2.10204	1.16731e-20	down
-1.03343	0.000536289	down	-1.66896	0.000383458	down	-1.28138	1.0096e-06	down	-0.654814	0.65871	insig	-0.357615	0.908254	insig	0.27274	0.547635	insig	PB.410	-0.150664	0.929331	insig	0.0951548	0.815947	insig	-0.643953	0.0110081	insig	0.252788	0.63349	insig	0.73457	0.00369184	insig	0.494043	0.291869	insig	1.91602	3.92402e-20	down	1.03985	0.00369403	down	0.114368	0.846826	insig	1.24909	1.31009e-05	down
-0.514226	0.086919	insig	-0.498294	0.321583	insig	-0.180756	0.595639	insig	-0.00463437	0.998717	insig	-0.288987	0.919246	insig	-0.307044	0.412021	insig	PB.411	-0.302093	0.802307	insig	-0.152611	0.709027	insig	-0.051317	0.908778	insig	0.155376	0.80414	insig	-0.106534	0.762309	insig	-0.249962	0.716882	insig	1.39763	8.35589e-10	down	1.19193	0.00048503	down	1.01362	0.0121381	down	1.23936	5.61819e-06	down
-1.24963	0.000675908	down	-1.87287	0.0725525	insig	-1.38673	0.0436897	down	-0.644566	0.886078	insig	-0.451684	0.971555	insig	0.164874	0.8977	insig	PB.413	-0.0878748	0.96948	insig	0.0755456	0.913177	insig	0.414567	0.152256	insig	0.166568	0.866912	insig	-0.34384	0.517893	insig	-0.497428	0.341638	insig	-0.434984	0.0410572	insig	-1.58838	0.00034553	up	-2.42093	0.0114382	up	-2.25848	0.00450329	up
-0.1861	0.713895	insig	0.293638	0.65753	insig	0.773432	0.0788701	insig	0.461148	0.772913	insig	-0.44733	0.866463	insig	-0.932051	0.0341883	insig	PB.414	0.607259	0.252552	insig	0.107826	0.882789	insig	-0.711535	0.0575225	insig	-0.491915	0.532731	insig	0.81497	0.128532	insig	1.32057	0.00992307	up	-0.223523	0.523646	insig	-1.01145	0.0110151	up	-0.0784342	0.908943	insig	1.22807	0.00381871	down
0.499682	0.646208	insig	-0.679705	0.687709	insig	-1.14282	0.308901	insig	-1.19861	0.608321	insig	0.496208	0.955822	insig	1.66891	0.00412126	up	PB.417	-0.461293	0.819528	insig	0.689924	0.400964	insig	-0.718158	0.253327	insig	1.15502	0.306411	insig	1.40284	0.079477	insig	0.260023	0.876077	insig	-0.616525	0.48013	insig	0.349623	0.643247	insig	-2.02244	0.0231879	up	-1.0738	0.0948134	insig
0.601765	0.228879	insig	1.38066	0.163444	insig	0.735185	0.151629	insig	0.757269	0.79256	insig	0.676005	0.869167	insig	-0.103425	0.830261	insig	PB.418	-0.393055	0.829594	insig	0.238252	0.651186	insig	0.405078	0.425892	insig	0.636184	0.220391	insig	-0.170917	0.51564	insig	-0.793856	0.136482	insig	-2.17248	4.88561e-07	up	-1.16907	0.00322033	up	-1.07311	0.177838	insig	-1.87098	4.40271e-15	up
0.851321	0.66908	insig	3.45492	0.00100735	up	1.83858	0.0423297	up	2.57549	0.499799	insig	1.64276	0.41407	insig	-0.945418	0.645012	insig	PB.421	-0.96834	0.644789	insig	-0.103077	0.913101	insig	1.3994	0.00979237	up	0.86738	0.481858	insig	-1.50704	0.00106506	down	-2.35983	0.00689654	down	-3.20888	9.54464e-07	up	-1.38224	0.47725	insig	0.302908	0.753478	insig	-2.80461	1.19085e-08	up
0.468865	0.230418	insig	0.507157	0.379045	insig	0.275525	0.5406	insig	0.0162784	0.993728	insig	0.25827	0.915845	insig	0.221418	0.506731	insig	PB.422	-0.0537385	0.979758	insig	-0.50224	0.0949333	insig	-0.193277	0.631459	insig	-0.441782	0.191338	insig	-0.313388	0.207066	insig	0.141239	0.823871	insig	-1.29864	5.18943e-05	up	-0.768755	0.00704498	insig	-0.329641	0.364073	insig	-0.859189	0.000419937	insig
0.398213	0.355724	insig	0.356765	0.744164	insig	-0.226252	0.65523	insig	-0.0641509	0.990494	insig	0.613913	0.887733	insig	0.655609	0.135319	insig	PB.424	-0.319635	0.363546	insig	-0.210124	0.594888	insig	0.307788	0.14862	insig	0.113742	0.864661	insig	-0.522999	0.128565	insig	-0.624142	0.0538021	insig	-1.13313	7.55876e-05	up	-0.407199	0.277994	insig	-0.60684	0.472348	insig	-1.69459	3.40738e-07	up
-1.23383	0.00181893	down	-1.87608	0.0160568	down	-1.21739	0.00563244	down	-0.662092	0.82235	insig	-0.629463	0.879034	insig	0.00835282	0.991597	insig	PB.427	0.919113	0.0909959	insig	-0.742025	0.00102466	insig	-1.17226	9.49252e-07	down	-1.65407	1.02386e-05	down	0.425005	0.0977269	insig	2.09148	2.15412e-07	up	1.5452	3.35539e-08	down	-0.603348	0.215308	insig	0.372997	0.654836	insig	1.46912	0.00132115	down
-1.17271	0.000669795	down	-1.4576	0.012001	down	-1.38953	0.000759355	down	-0.306119	0.882704	insig	-0.0389743	0.993405	insig	0.244499	0.614549	insig	PB.428	0.118526	0.958008	insig	0.12456	0.767993	insig	-0.467802	0.190181	insig	0.0121937	0.988222	insig	0.586864	0.0126708	insig	0.586626	0.242864	insig	1.69867	1.41614e-07	down	0.41288	0.226657	insig	0.078111	0.896927	insig	0.74817	0.063252	insig
-0.648007	0.0578497	insig	-1.09626	0.114772	insig	0.0985795	0.873249	insig	-0.467183	0.871281	insig	-1.16837	0.562791	insig	-0.725752	0.218713	insig	PB.429	-0.187042	0.93285	insig	-0.817945	0.0292732	insig	-0.569622	0.18869	insig	-0.625868	0.0918521	insig	-0.254178	0.36568	insig	0.383842	0.362932	insig	1.32297	3.52203e-06	down	0.86546	0.0274464	insig	1.00597	0.118984	insig	1.96323	9.60318e-05	down
-0.146245	0.675897	insig	0.145953	0.78463	insig	-0.0434801	0.922491	insig	0.272545	0.812236	insig	0.217994	0.930183	insig	-0.0774182	0.848013	insig	PB.430	-0.0456905	0.98048	insig	-0.37373	0.281873	insig	0.774807	0.00713754	insig	-0.324848	0.544143	insig	-1.15391	0.000266933	down	-0.81763	0.0449936	insig	1.43758	5.73293e-09	down	1.34108	1.47722e-07	down	1.91698	7.78687e-09	down	0.589379	0.0592112	insig
-0.232963	0.359618	insig	-0.223625	0.650492	insig	-0.181422	0.660933	insig	-0.0111338	0.995941	insig	-0.0142747	0.997128	insig	-0.023368	0.967668	insig	PB.431	0.350369	0.904824	insig	1.43234	0.00314174	up	-0.455445	0.546863	insig	1.08682	0.000268502	up	1.88191	8.83291e-20	up	0.805974	0.0771868	insig	2.26614	2.77222e-08	down	1.68697	1.33142e-09	down	0.569729	0.0979833	insig	2.50732	1.31867e-12	down
-0.647232	0.0194426	insig	-0.380232	0.592898	insig	-0.412616	0.372751	insig	0.246261	0.925533	insig	0.0590008	0.993405	insig	-0.210095	0.741198	insig	PB.433	-0.124529	0.939676	insig	-0.308042	0.417764	insig	0.772191	0.00572483	insig	-0.17976	0.734951	insig	-1.08568	3.7793e-05	down	-0.893921	0.00278182	insig	3.05779	3.12786e-42	down	2.5399	3.75918e-22	down	2.94645	4.47218e-09	down	1.84471	4.5555e-05	down
0.339673	0.554885	insig	1.3861	0.0281289	up	0.393088	0.379697	insig	1.02416	0.576822	insig	1.02186	0.511495	insig	-0.0204684	0.982211	insig	PB.434	0.37529	0.80118	insig	0.676954	0.0248762	insig	0.126782	0.72969	insig	0.308495	0.671482	insig	0.54549	0.0565465	insig	0.246828	0.742727	insig	-2.19964	3.07388e-16	up	-2.23118	3.76429e-05	up	-1.53475	0.00348729	up	-1.9666	5.35441e-09	up
0.249133	0.503524	insig	-0.129888	0.872911	insig	-0.688851	0.0687098	insig	-0.399985	0.849829	insig	0.592038	0.791301	insig	0.967734	0.00583304	insig	PB.435	-0.195703	0.685822	insig	0.106959	0.69042	insig	0.209453	0.219766	insig	0.307446	0.270354	insig	-0.107595	0.63173	insig	-0.402646	0.133774	insig	-1.26775	2.00275e-07	up	-0.815731	0.0027554	insig	-1.54206	0.00129729	up	-2.19383	2.15648e-12	up
0.0426182	0.919651	insig	0.0459422	0.947651	insig	0.689466	0.0746479	insig	-0.016499	0.99401	insig	-0.614422	0.709368	insig	-0.622258	0.125809	insig	PB.436	-0.0386173	0.989668	insig	-0.38696	0.400229	insig	-0.217457	0.708423	insig	-0.344944	0.180705	insig	-0.175445	0.379396	insig	0.18272	0.662372	insig	0.633851	0.0697342	insig	0.720158	0.0126639	insig	1.02872	0.00670626	down	1.51161	3.83891e-05	down
0.0492654	0.961288	insig	2.98107	0.0156681	up	1.28636	0.126577	insig	2.90531	0.156635	insig	1.72061	0.629876	insig	-1.20126	0.177322	insig	PB.437	-0.936073	0.0921355	insig	-0.805113	0.0451649	insig	0.37108	0.288265	insig	0.135353	0.89625	insig	-1.18091	0.00298054	down	-1.30376	0.014349	down	-2.90839	4.14828e-12	up	-1.91586	0.00161191	up	0.826536	0.495819	insig	-2.02693	0.00433578	up
-0.40057	0.318129	insig	0.118355	0.91625	insig	0.208959	0.572749	insig	0.498021	0.880933	insig	-0.0666103	0.993405	insig	-0.584704	0.126164	insig	PB.439	-0.238962	0.724766	insig	0.151289	0.617732	insig	0.236987	0.327551	insig	0.395615	0.271422	insig	-0.0907117	0.756015	insig	-0.473422	0.2446	insig	-1.78028	2.6393e-17	up	-1.93515	1.29567e-08	up	-1.85508	0.00510851	up	-1.83764	3.77758e-14	up
0.953032	0.0119587	insig	0.954341	0.237253	insig	0.240351	0.56222	insig	-0.0220103	0.996245	insig	0.742731	0.779752	insig	0.744497	0.0509902	insig	PB.440	-0.372815	0.662502	insig	-0.334268	0.301431	insig	-0.041651	0.922942	insig	0.0433084	0.956849	insig	-0.297374	0.380717	insig	-0.328349	0.617273	insig	-0.246115	0.42804	insig	1.0885	0.0056691	down	1.00053	0.139533	insig	0.00818991	0.981866	insig
-0.458835	0.142551	insig	-0.958979	0.17902	insig	0.210576	0.771321	insig	-0.51997	0.842324	insig	-1.14298	0.649917	insig	-0.647784	0.387084	insig	PB.441	0.189042	0.926964	insig	-0.0273799	0.966111	insig	-0.433538	0.296631	insig	-0.210721	0.703208	insig	0.400495	0.179404	insig	0.624462	0.0432121	insig	-1.20745	7.0947e-06	up	-1.85047	1.0822e-08	up	-2.17753	0.000306524	up	-0.589187	0.413675	insig
-0.554914	0.0179338	insig	-0.596159	0.247912	insig	-0.390745	0.293068	insig	-0.0619716	0.98126	insig	-0.178434	0.975682	insig	-0.139009	0.791074	insig	PB.442	0.0992655	0.932043	insig	0.129064	0.641494	insig	-0.140249	0.541857	insig	0.0360166	0.946064	insig	0.264394	0.22705	insig	0.241281	0.550032	insig	1.20763	2.43715e-12	down	0.559551	0.0263842	insig	0.442818	0.348685	insig	0.929018	0.013559	insig
0.381169	0.24032	insig	0.109804	0.869506	insig	-0.514707	0.1568	insig	-0.291794	0.842324	insig	0.655089	0.578155	insig	0.924027	9.35921e-05	insig	PB.443	-0.413316	0.596473	insig	0.203099	0.584275	insig	-1.16004	8.74651e-05	down	0.621604	0.0028826	insig	1.35793	1.1473e-17	up	0.749356	0.00902925	insig	-0.718377	0.0175758	insig	0.0841107	0.748301	insig	-0.848309	0.0199676	insig	-0.101994	0.727716	insig
1.89609	0.0278966	up	1.32403	0.323672	insig	0.149294	0.924047	insig	-0.595797	0.880933	insig	1.20315	0.782705	insig	1.78108	0.0486813	up	PB.444	-0.414994	0.811554	insig	0.433027	0.322653	insig	0.594078	0.193776	insig	0.852874	0.058258	insig	-0.165216	0.557488	insig	-1.0051	0.0671842	insig	-4.85065	2.14952e-23	up	-2.53272	1.14961e-05	up	-4.00047	7.91057e-13	up	-5.33142	5.34902e-25	up
-0.744411	0.00324526	insig	-1.14996	0.000316681	down	-0.977487	5.01319e-06	insig	-0.425626	0.652766	insig	-0.14131	0.967235	insig	0.260733	0.401857	insig	PB.445	-0.132035	0.911947	insig	0.0879839	0.769249	insig	-0.0894483	0.766255	insig	0.226016	0.562228	insig	0.172625	0.494855	insig	-0.0414186	0.950486	insig	0.632438	0.00068284	insig	0.0262029	0.945755	insig	-0.645395	0.0287994	insig	-0.285719	0.230419	insig
-0.88421	0.0187435	insig	-1.22921	0.0140193	down	-0.846879	0.0255663	insig	-0.362971	0.878761	insig	-0.352848	0.925407	insig	-0.0158716	0.983496	insig	PB.446	-0.0603721	0.976009	insig	0.142193	0.725127	insig	-0.11983	0.779058	insig	0.208719	0.615471	insig	0.25752	0.336648	insig	0.0612535	0.924014	insig	2.45883	2.97571e-23	down	1.6403	3.31441e-05	down	1.04896	0.0180373	down	1.70229	1.72834e-05	down
0.978148	0.120194	insig	1.11124	0.328872	insig	1.35511	0.0259819	up	0.112381	0.98139	insig	-0.214481	0.984675	insig	-0.351803	0.476734	insig	PB.448	0.582679	0.384971	insig	-0.0801596	0.86653	insig	0.350526	0.40856	insig	-0.658629	0.108116	insig	-0.435769	0.189888	insig	0.237262	0.730608	insig	-3.16213	2.05521e-13	up	-2.76162	4.81938e-16	up	-2.01554	0.00348122	up	-2.18926	3.22972e-10	up
0.350377	0.175448	insig	0.271135	0.568039	insig	0.0436208	0.882013	insig	-0.100075	0.957015	insig	0.259421	0.914689	insig	0.337508	0.236519	insig	PB.449	-0.0719691	0.967212	insig	0.352591	0.203679	insig	0.222802	0.501171	insig	0.431099	0.0926388	insig	0.125265	0.60837	insig	-0.292203	0.424229	insig	-0.933336	8.79632e-06	insig	-0.504526	0.0525643	insig	-1.0545	0.00198212	up	-1.14406	2.55934e-09	up
-1.05405	0.00266652	down	-1.27707	0.0676821	insig	-1.27073	0.000792557	down	-0.243817	0.930942	insig	0.0249894	0.99657	insig	0.246506	0.506874	insig	PB.451	0.565758	0.693454	insig	1.45463	0.00428492	up	-1.743	2.70031e-05	down	0.899851	0.261665	insig	3.19396	2.85602e-12	up	2.3062	2.69927e-07	up	-0.378337	0.354815	insig	-1.99102	4.87088e-08	up	-3.14828	6.85103e-07	up	0.0656389	0.866983	insig
0.733502	0.00840526	insig	0.704255	0.270168	insig	0.770118	0.0166785	insig	-0.0501053	0.989455	insig	-0.0355019	0.993405	insig	-0.00579746	0.989054	insig	PB.452	0.44249	0.465798	insig	-0.849482	1.67958e-05	insig	-0.621127	0.000526858	insig	-1.28456	1.80044e-05	down	-0.232989	0.304872	insig	1.06368	0.00148973	up	-0.0988656	0.722832	insig	0.197656	0.541459	insig	1.41651	0.00431678	down	1.25901	4.49487e-07	down
-0.143071	0.677952	insig	-0.224484	0.721009	insig	0.0540555	0.862214	insig	-0.101438	0.967421	insig	-0.251623	0.945876	insig	-0.172153	0.625298	insig	PB.453	-0.031686	0.987827	insig	0.145885	0.628659	insig	-0.357571	0.183267	insig	0.183641	0.64874	insig	0.498398	0.00394539	insig	0.327248	0.458251	insig	-0.928944	6.62873e-06	insig	-1.03423	0.000792741	up	-1.33799	0.00121834	up	-0.546821	0.00325726	insig
-0.137101	0.696495	insig	0.273769	0.515697	insig	0.325209	0.5406	insig	0.391098	0.595047	insig	-0.0216707	0.99657	insig	-0.433752	0.439402	insig	PB.455	0.501309	0.570021	insig	-0.0635506	0.921071	insig	0.083694	0.895646	insig	-0.559297	0.311008	insig	-0.151969	0.777616	insig	0.420427	0.600912	insig	1.65876	1.28345e-09	down	1.02606	0.000662672	down	1.95542	8.3824e-11	down	1.86489	0.000296096	down
-0.447463	0.08164	insig	-0.389109	0.521647	insig	-0.242314	0.416981	insig	0.0384612	0.990956	insig	-0.11922	0.985511	insig	-0.179893	0.616594	insig	PB.457	0.275085	0.786147	insig	-0.105537	0.833883	insig	-0.468474	0.206287	insig	-0.374796	0.546442	insig	0.357682	0.430969	insig	0.74568	0.14216	insig	1.14699	3.71257e-09	down	0.429136	0.186586	insig	0.824217	0.121714	insig	1.34143	0.000122076	down
-0.465567	0.150476	insig	-1.07479	0.0231437	down	-1.37121	0.00232396	down	-0.629664	0.608321	insig	0.328171	0.948139	insig	0.932936	0.0734721	insig	PB.458	-0.636661	0.292813	insig	-2.00785	5.61469e-09	down	-0.385081	0.451276	insig	-1.36676	0.0154814	down	-1.62835	0.00134068	down	-0.248158	0.818435	insig	1.40874	4.03665e-09	down	1.58695	8.54283e-06	down	2.30559	5.33172e-07	down	0.394119	0.55355	insig
-0.0827948	0.842751	insig	-0.495457	0.430468	insig	-0.276404	0.498299	insig	-0.432898	0.82485	insig	-0.187985	0.97606	insig	0.219733	0.66407	insig	PB.459	-0.315721	0.785345	insig	0.0759607	0.874427	insig	-0.196456	0.685582	insig	0.398092	0.45901	insig	0.267321	0.516713	insig	-0.117104	0.884422	insig	-0.444874	0.0927696	insig	-0.204583	0.628792	insig	-1.05517	0.0314862	up	-0.553088	0.202508	insig
1.23599	0.0783581	insig	2.79219	0.00784772	up	3.33018	1.29481e-07	up	1.53112	0.590389	insig	-0.507621	0.955822	insig	-2.05538	0.0090348	down	PB.460	-0.0562087	0.989955	insig	1.27529	0.0114569	up	1.22979	0.0371546	up	1.33558	0.0144345	up	0.0413556	0.918267	insig	-1.28048	0.050432	insig	-2.3124	6.11788e-06	up	-1.01169	0.188971	insig	-0.839226	0.398297	insig	-0.246213	0.765379	insig
0.283605	0.531385	insig	0.110583	0.869082	insig	0.420194	0.316495	insig	-0.194194	0.899633	insig	-0.27993	0.873859	insig	-0.10714	0.820145	insig	PB.461	-0.0544373	0.979758	insig	0.353733	0.376266	insig	0.41788	0.199408	insig	0.413218	0.500694	insig	-0.0690232	0.885464	insig	-0.468219	0.425315	insig	-1.04309	0.000943467	up	-0.699168	0.0631175	insig	-1.32691	0.000174728	up	-1.07202	9.74703e-05	up
-0.843428	0.00305587	insig	-0.933641	0.135002	insig	-0.578087	0.0574129	insig	-0.110634	0.968003	insig	-0.32527	0.932074	insig	-0.236672	0.270657	insig	PB.462	-0.0897009	0.940306	insig	0.0971974	0.704028	insig	-0.408389	0.036118	insig	0.19281	0.552644	insig	0.500754	0.0031848	insig	0.320559	0.408337	insig	1.06404	1.6302e-05	down	0.316287	0.188734	insig	-0.00400764	0.99464	insig	0.862854	7.84605e-07	insig
0.059809	0.856476	insig	-0.814943	0.417854	insig	-1.18524	0.0501632	insig	-0.893875	0.743058	insig	0.406871	0.968817	insig	1.27116	0.0545261	insig	PB.463	0.316563	0.813386	insig	0.468851	0.201091	insig	0.5298	0.243366	insig	0.156544	0.542794	insig	-0.0666997	0.835974	insig	-0.209197	0.660251	insig	-0.887126	0.00181772	insig	-1.1381	1.58365e-06	up	-2.2071	0.00484207	up	-2.6269	0.000152197	up
-0.877023	0.00243593	insig	-1.28666	0.0200196	down	-0.787147	0.0735022	insig	-0.429596	0.84234	insig	-0.471992	0.903503	insig	-0.0665341	0.937126	insig	PB.464	-0.599153	0.499321	insig	-0.746497	0.00250562	insig	-0.767515	0.00933888	insig	-0.141158	0.839855	insig	0.0156207	0.952413	insig	0.168602	0.825346	insig	0.8155	0.000410894	insig	0.542795	0.208337	insig	0.237089	0.695994	insig	0.767967	0.135885	insig
0.368821	0.425985	insig	0.875715	0.531456	insig	-0.565653	0.186998	insig	0.486347	0.927414	insig	1.47885	0.686015	insig	0.967491	0.0333376	insig	PB.465	-0.626834	0.494303	insig	-0.760411	0.0486243	insig	-0.41808	0.356128	insig	-0.127721	0.878304	insig	-0.346699	0.349383	insig	-0.204906	0.818389	insig	-0.955252	0.00362109	insig	0.0488947	0.936336	insig	0.641728	0.603941	insig	-1.13395	0.00114633	up
-0.111762	0.861995	insig	0.604419	0.386668	insig	0.299679	0.666829	insig	0.695404	0.318034	insig	0.333544	0.925407	insig	-0.381439	0.499135	insig	PB.468	-0.437912	0.671388	insig	0.18683	0.647091	insig	0.407426	0.105801	insig	0.628249	0.285362	insig	-0.225728	0.520668	insig	-0.840697	0.12984	insig	-1.71756	7.46111e-06	up	-1.38601	0.000674279	up	-1.34047	9.03279e-05	up	-1.85953	6.09668e-06	up
-0.18852	0.524523	insig	0.366865	0.485486	insig	0.386993	0.307796	insig	0.534227	0.632351	insig	0.00775674	0.998035	insig	-0.547897	0.147068	insig	PB.469	-0.145021	0.891153	insig	-0.209101	0.569728	insig	0.219644	0.397973	insig	-0.0588069	0.928796	insig	-0.433642	0.146332	insig	-0.361923	0.331784	insig	-1.20824	3.0641e-09	up	-1.24628	5.26537e-08	up	-0.672255	0.122153	insig	-1.07026	0.00273018	up
0.812651	0.193704	insig	2.48132	1.36449e-05	up	1.61777	0.0156715	up	1.65122	0.298654	insig	0.887205	0.788584	insig	-0.789973	0.4454	insig	PB.472	0.328175	0.771111	insig	-0.692457	0.132739	insig	-0.0218046	0.985211	insig	-1.0174	0.0448735	down	-0.676341	0.398684	insig	0.356396	0.780157	insig	-1.85119	1.3365e-10	up	-1.36101	0.0342761	up	1.28013	0.0321253	down	-0.245262	0.819129	insig
-0.0377583	0.903424	insig	-0.117063	0.739085	insig	0.266741	0.254307	insig	-0.098914	0.939293	insig	-0.354603	0.718766	insig	-0.278139	0.323717	insig	PB.473	0.206246	0.821684	insig	0.118379	0.762834	insig	-0.126118	0.747741	insig	-0.0819504	0.887062	insig	0.23948	0.483638	insig	0.335869	0.483959	insig	0.665282	0.000325717	insig	0.426815	0.115738	insig	0.389168	0.227271	insig	1.02559	5.50575e-05	down
0.508825	0.144117	insig	1.12152	0.0124544	up	1.07455	5.3959e-06	up	0.591401	0.674008	insig	0.0740331	0.992802	insig	-0.536775	0.16064	insig	PB.474	-0.256668	0.890697	insig	0.00242473	0.998116	insig	0.0928469	0.872673	insig	0.266346	0.606533	insig	-0.0946968	0.801882	insig	-0.348228	0.485187	insig	-0.448642	0.155657	insig	0.323254	0.441673	insig	0.628276	0.160292	insig	0.502456	0.0412573	insig
2.12903	0.000101511	up	4.00243	1.4153e-07	up	3.03904	6.44476e-10	up	1.84831	0.318125	insig	0.989918	0.76089	insig	-0.873256	0.279621	insig	PB.475	0.267671	0.949411	insig	0.95419	0.140482	insig	3.02918	1.13361e-12	up	0.689703	0.605169	insig	-2.07939	0.000147875	down	-2.75554	0.000215403	down	-0.728127	0.0940382	insig	1.14125	0.16418	insig	2.27377	0.00508983	down	-0.749695	0.244352	insig
1.51207	0.000246806	up	2.39162	1.88953e-09	up	2.36458	1.57946e-09	up	0.857476	0.303194	insig	0.0560543	0.993405	insig	-0.820043	0.0779367	insig	PB.476	-0.201394	0.963069	insig	-1.1499	0.163902	insig	1.87843	0.00158879	up	-0.943501	0.390516	insig	-3.03194	4.69978e-08	down	-2.07554	4.49204e-06	down	-1.43761	0.00553381	up	0.282498	0.618258	insig	2.06348	0.000468992	down	-0.984868	0.0107405	insig
0.672193	0.396734	insig	1.84644	0.174308	insig	3.42884	1.7218e-11	up	1.14955	0.759175	insig	-1.56312	0.605526	insig	-2.72876	6.05682e-09	down	PB.477	1.36652	0.832703	insig	-0.91472	0.681942	insig	-1.11554	0.646819	insig	-2.27938	7.23527e-05	down	0.19238	0.816259	insig	2.48549	7.85671e-06	up	-3.80843	7.6553e-05	up	-4.49986	5.20916e-28	up	-1.08536	0.34108	insig	0.70137	0.249527	insig
-0.66925	0.591063	insig	1.80283	0.413506	insig	0.191502	0.893824	insig	2.45089	0.654499	insig	1.64038	0.850665	insig	-0.836281	0.580287	insig	PB.478	1.14565	0.358639	insig	0.184456	0.868096	insig	2.18508	0.00253765	up	-0.955989	0.252321	insig	-2.00534	0.00157613	down	-1.03926	0.312556	insig	0.158911	0.860613	insig	-1.64969	0.112612	insig	1.73058	0.338625	insig	-1.85988	0.0574212	insig
0.0198606	0.977801	insig	0.48045	0.554921	insig	-0.31666	0.707274	insig	0.441033	0.788767	insig	0.825775	0.740002	insig	0.366232	0.65406	insig	PB.479	0.479265	0.823147	insig	1.52153	0.00427234	up	-0.211594	0.817908	insig	1.05192	0.00283582	up	1.72982	1.55746e-06	up	0.689907	0.155811	insig	0.355377	0.54756	insig	-0.0996443	0.793563	insig	-0.730696	0.127137	insig	0.214727	0.784339	insig
1.88395	0.0171464	up	1.33494	0.380448	insig	0.614848	0.599786	insig	-0.574809	0.899633	insig	0.748204	0.916512	insig	1.30177	0.0680932	insig	PB.480	0.0528047	0.986444	insig	-0.0461771	0.949118	insig	-1.28269	0.00917244	down	-0.091692	0.931904	insig	1.23189	0.020115	up	1.3376	0.0723244	insig	-3.66866	2.89619e-12	up	-1.83355	0.0003183	up	-2.33482	0.00591646	up	-1.80556	0.0101846	up
-0.0445175	0.897657	insig	-0.221002	0.607145	insig	0.080735	0.820715	insig	-0.196214	0.844638	insig	-0.272385	0.830372	insig	-0.0985488	0.741794	insig	PB.481	0.286158	0.606197	insig	0.492727	0.0203643	insig	-0.527337	0.00109799	insig	0.212075	0.606499	insig	1.01515	3.28995e-07	up	0.814841	0.00624636	insig	0.335247	0.136197	insig	0.00992534	0.975282	insig	-0.417816	0.150547	insig	0.911852	4.4409e-07	insig
0.666569	0.127441	insig	1.04925	0.307028	insig	0.316871	0.448347	insig	0.36105	0.932255	insig	0.76135	0.860433	insig	0.378795	0.49274	insig	PB.483	-0.00202523	0.999287	insig	0.228235	0.496995	insig	0.404007	0.0858301	insig	0.236189	0.685902	insig	-0.18081	0.557194	insig	-0.405237	0.441457	insig	-2.0603	1.56845e-18	up	-1.3874	0.00137675	up	-1.28401	0.120575	insig	-2.17843	2.57909e-16	up
-0.492122	0.137366	insig	0.131202	0.869921	insig	0.14361	0.734855	insig	0.601787	0.693315	insig	0.0167285	0.997101	insig	-0.604359	0.0219645	insig	PB.485	-0.0264215	0.988993	insig	-0.0869736	0.781164	insig	-0.193891	0.478946	insig	-0.0541976	0.926215	insig	0.102024	0.701472	insig	0.168402	0.779646	insig	0.983598	0.000266846	insig	0.522316	0.0783707	insig	1.16189	0.0154083	down	1.28795	2.4702e-08	down
0.532	0.337117	insig	0.943844	0.315176	insig	0.200537	0.761532	insig	0.390972	0.900941	insig	0.775233	0.788382	insig	0.361507	0.473771	insig	PB.486	-0.506839	0.474792	insig	-0.119572	0.803873	insig	0.20721	0.585155	insig	0.392274	0.470994	insig	-0.331386	0.308843	insig	-0.710638	0.145941	insig	-2.62908	3.81076e-14	up	-1.58151	4.23538e-05	up	-1.60487	0.0106466	up	-2.66484	1.28338e-22	up
0.409965	0.293035	insig	0.279167	0.806608	insig	-1.0208	0.00504595	down	-0.152681	0.974877	insig	1.33375	0.568569	insig	1.46265	0.00135202	up	PB.487	0.0837376	0.937987	insig	0.344235	0.0970658	insig	0.362904	0.0462432	insig	0.26629	0.383747	insig	-0.0237504	0.92668	insig	-0.276863	0.383787	insig	-1.66336	4.82145e-18	up	-1.33075	0.000355982	up	-1.76871	0.0221288	up	-3.0749	1.31364e-16	up
-0.899022	0.00418784	insig	-0.180609	0.879485	insig	-0.63537	0.0706509	insig	0.697762	0.821173	insig	0.479814	0.937367	insig	-0.238259	0.549912	insig	PB.489	-0.255815	0.771304	insig	-0.286574	0.370627	insig	-0.633386	0.0422539	insig	-0.0255153	0.963145	insig	0.341734	0.26854	insig	0.380573	0.403784	insig	1.26495	2.36132e-06	down	0.626463	0.0263714	insig	1.33263	0.0947197	insig	1.23142	0.000152709	down
0.520758	0.274947	insig	-0.0719399	0.936546	insig	0.553366	0.21431	insig	-0.613628	0.677928	insig	-0.599015	0.721905	insig	-0.00789788	0.988882	insig	PB.490	-0.0915882	0.939676	insig	-0.0214972	0.957711	insig	-0.233493	0.395601	insig	0.0760849	0.885327	insig	0.206957	0.485169	insig	0.144505	0.787801	insig	-3.07529	2.05692e-29	up	-2.45771	3.46786e-15	up	-3.16944	9.826e-18	up	-2.31902	8.10976e-21	up
2.36861	0.0262106	up	5.26146	0.00678163	up	3.86551	1.95644e-05	up	2.87542	0.540056	insig	1.43182	0.884612	insig	-1.45918	0.136454	insig	PB.491	0.273897	0.969508	insig	-0.304071	0.83771	insig	2.19379	0.0321081	up	-0.578361	0.711193	insig	-2.5052	0.000586832	down	-1.91345	0.0752515	insig	-3.49253	0.000158205	up	-1.39784	0.151581	insig	2.02885	0.272019	insig	-1.85888	0.0328767	up
0.318019	0.558549	insig	0.669591	0.283461	insig	0.551673	0.197511	insig	0.331334	0.882704	insig	0.145371	0.981793	insig	-0.207988	0.72565	insig	PB.494	0.284924	0.852095	insig	0.149307	0.838415	insig	0.342838	0.433328	insig	-0.129928	0.911411	insig	-0.198505	0.759853	insig	-0.0573946	0.958568	insig	-1.01789	0.00183411	up	-0.980419	0.0493819	insig	-0.540591	0.372163	insig	-0.838029	0.016226	insig
2.96357	1.30462e-11	up	1.30128	0.447414	insig	1.40646	0.0741354	insig	-1.67706	0.662369	insig	-0.0606245	0.99657	insig	1.59182	0.0341883	up	PB.495	-0.921957	0.747692	insig	1.66328	0.0176315	up	-0.437057	0.726511	insig	2.586	0.00010427	up	2.0947	0.000280932	up	-0.480822	0.80198	insig	-0.0504288	0.947447	insig	3.83512	1.04308e-12	down	-0.442938	0.779264	insig	1.75746	0.0434106	down
-0.105264	0.853686	insig	-0.465728	0.489626	insig	-0.621639	0.233312	insig	-0.382213	0.620756	insig	0.187112	0.95237	insig	0.54743	0.104584	insig	PB.496	-0.115392	0.948286	insig	-0.318765	0.300151	insig	-0.121571	0.742013	insig	-0.196974	0.733325	insig	-0.202245	0.513243	insig	0.00611087	0.99389	insig	-0.553715	0.167605	insig	-0.538061	0.102993	insig	-0.741194	0.00887465	insig	-1.08418	0.000626641	up
2.0487	0.00827027	up	1.49483	0.268511	insig	3.84898	1.08747e-06	up	-0.574467	0.882618	insig	-2.31777	0.129548	insig	-1.77099	0.00761223	down	PB.498	3.43702	0.880193	insig	NA	NA	insig	4.8505	0.274358	insig	-3.39921	0.710035	insig	-4.81829	0.207444	insig	-1.39867	0.799682	insig	8.09264	5.62652e-07	down	6.66808	2.74101e-12	down	9.51833	4.07978e-09	down	7.06997	1.24211e-17	down
-0.322112	0.553744	insig	0.41745	0.652592	insig	2.80873	1.0096e-06	up	0.717949	0.710348	insig	-2.36169	0.0244447	down	-3.09943	2.25427e-08	down	PB.499	-0.188359	0.969508	insig	1.27626	0.0207352	up	-0.0137916	0.990979	insig	1.4677	0.0216408	up	1.28466	0.0249538	up	-0.169795	0.934435	insig	1.64436	0.00097118	down	1.5159	0.00543503	down	0.748655	0.255697	insig	4.43059	1.14327e-10	down
0.182195	0.702666	insig	0.329837	0.6209	insig	0.243561	0.588697	insig	0.128239	0.955191	insig	0.116741	0.985511	insig	-0.0344007	0.955675	insig	PB.502	-0.399796	0.866236	insig	0.253141	0.73135	insig	0.334154	0.634432	insig	0.657855	0.39896	insig	-0.0854323	0.888296	insig	-0.731479	0.447371	insig	1.04817	0.00994438	down	1.63537	0.000203613	down	1.08315	0.0237231	down	0.926113	0.00538768	insig
-0.658785	0.0690776	insig	-0.593331	0.459961	insig	-0.972816	0.00327506	insig	0.0467539	0.991633	insig	0.408746	0.929614	insig	0.338502	0.431658	insig	PB.503	-0.207239	0.846286	insig	-0.317259	0.332732	insig	-0.366663	0.312787	insig	-0.10335	0.879301	insig	0.0444994	0.92541	insig	0.159514	0.829347	insig	2.87443	6.95543e-30	down	2.42661	2.64343e-13	down	2.55925	1.17262e-05	down	2.23757	8.30894e-12	down
1.36542	0.0876688	insig	0.610582	0.66101	insig	1.83454	0.0146186	up	-0.779667	0.768108	insig	-1.19722	0.567974	insig	-0.437143	0.555352	insig	PB.504	-0.367662	0.888502	insig	0.687203	0.0789162	insig	-1.05746	0.0176178	down	1.06238	0.0540324	insig	1.73949	4.21953e-20	up	0.688372	0.380129	insig	-4.35314	3.20987e-16	up	-2.61162	4.01945e-06	up	-4.46924	1.05234e-18	up	-1.48938	0.000438329	up
-0.489394	0.421511	insig	-0.121893	0.924879	insig	-0.0586534	0.941707	insig	0.347792	0.93335	insig	-0.0349909	0.99657	insig	-0.407098	0.595922	insig	PB.505	2.08408	4.34668e-05	up	0.681051	0.139595	insig	0.196128	0.789016	insig	-1.39703	0.000272382	down	0.479015	0.21548	insig	1.88732	3.8959e-05	up	3.90232	2.95766e-19	down	1.33155	0.0110345	down	3.05964	1.63381e-05	down	3.61668	1.59574e-13	down
1.3033	0.00969912	up	1.65061	0.0643779	insig	1.87053	1.08691e-05	up	0.327456	0.931796	insig	-0.19521	0.984675	insig	-0.543742	0.229597	insig	PB.507	-0.488568	0.831649	insig	0.471083	0.367652	insig	0.142035	0.83243	insig	0.961285	0.203262	insig	0.323837	0.410134	insig	-0.622498	0.497327	insig	0.594487	0.216192	insig	2.39271	1.04161e-05	down	1.73519	0.0167007	down	2.29142	1.92631e-26	down
-0.163247	0.601732	insig	0.522354	0.32777	insig	0.121501	0.70356	insig	0.665804	0.546725	insig	0.428872	0.814619	insig	-0.258196	0.33327	insig	PB.508	0.269446	0.564771	insig	0.13994	0.591863	insig	0.344486	0.0283625	insig	-0.124369	0.767717	insig	-0.209464	0.336843	insig	-0.0721327	0.881322	insig	0.917644	5.46667e-06	insig	0.48976	0.058453	insig	1.25999	0.00198212	down	0.662188	0.000141114	insig
0.653072	0.0950282	insig	0.879368	0.278797	insig	0.269179	0.52622	insig	0.20389	0.951968	insig	0.637695	0.831317	insig	0.414023	0.330221	insig	PB.509	-0.402857	0.638966	insig	-0.174968	0.607744	insig	-0.266191	0.418549	insig	0.234462	0.627716	insig	0.0864147	0.736763	insig	-0.136094	0.833416	insig	-2.31714	9.25188e-18	up	-1.25425	0.000604356	up	-1.3065	0.0332346	up	-1.81098	2.53537e-13	up
1.14285	0.0495188	up	1.63051	0.179285	insig	0.677361	0.35248	insig	0.463127	0.925317	insig	0.984865	0.850646	insig	0.50148	0.560373	insig	PB.510	0.206272	0.936843	insig	0.485942	0.334965	insig	0.389512	0.497105	insig	0.284366	0.669635	insig	0.0908036	0.846396	insig	-0.180348	0.843639	insig	-1.63706	0.00015873	up	-0.695612	0.236246	insig	-0.539606	0.627159	insig	-1.3837	0.0203048	up
0.654924	0.133592	insig	1.19176	0.167176	insig	0.47926	0.334743	insig	0.513199	0.865562	insig	0.740436	0.808021	insig	0.207896	0.707561	insig	PB.511	-0.0330926	0.989668	insig	-0.104699	0.887812	insig	1.60631	1.43859e-08	up	-0.0683486	0.953415	insig	-1.71605	4.04287e-05	down	-1.63604	5.97754e-05	down	0.216714	0.598639	insig	0.912818	0.022511	insig	1.47048	0.0464598	down	-0.940394	0.00632212	insig
0.0465895	0.913526	insig	0.68503	0.299332	insig	0.971754	0.0283088	insig	0.617762	0.693315	insig	-0.261475	0.968324	insig	-0.897849	0.0364715	insig	PB.512	0.421974	0.330775	insig	-0.42792	0.0757461	insig	-0.633528	0.028052	insig	-0.844086	0.00189915	insig	0.200769	0.555465	insig	1.05632	0.00891484	up	0.207173	0.482954	insig	-0.162816	0.606736	insig	1.27981	0.010037	down	1.77969	9.38041e-05	down
0.6013	0.184481	insig	-0.398144	0.796467	insig	-1.85687	0.00165684	down	-1.01603	0.800201	insig	1.49462	0.699469	insig	2.47812	1.20131e-05	up	PB.513	0.117012	0.931976	insig	-0.273371	0.229677	insig	-0.825185	0.00484614	insig	-0.384377	0.25975	insig	0.546922	0.0666341	insig	0.944573	0.0171722	insig	-3.62962	1.97147e-30	up	-3.13538	9.47502e-21	up	-3.78643	0.000116214	up	-4.68288	3.16756e-14	up
-0.421391	0.167688	insig	-0.474639	0.30785	insig	-0.0678136	0.87939	insig	-0.07237	0.966851	insig	-0.377987	0.811009	insig	-0.327559	0.313868	insig	PB.514	0.38884	0.44575	insig	0.02567	0.946616	insig	0.0528143	0.875557	insig	-0.357602	0.226089	insig	-0.0317517	0.899479	insig	0.339046	0.377631	insig	1.86134	3.47807e-14	down	1.05627	1.47045e-05	down	1.32124	8.92417e-06	down	1.70798	2.10675e-11	down
0.685812	0.0745329	insig	1.18218	0.0106537	up	1.0519	0.024932	up	0.474035	0.760318	insig	0.157882	0.984321	insig	-0.334215	0.621463	insig	PB.516	0.194304	0.875571	insig	0.0755838	0.858448	insig	-0.163132	0.669058	insig	-0.11224	0.780785	insig	0.234296	0.303877	insig	0.359942	0.335022	insig	-1.74408	4.19738e-11	up	-1.24503	0.00042836	up	-0.679244	0.0694828	insig	-0.561178	0.281573	insig
-0.896354	0.0203387	insig	-0.61426	0.137633	insig	0.169314	0.715913	insig	0.262625	0.903451	insig	-0.754113	0.548208	insig	-1.03899	0.0281595	down	PB.517	0.781783	0.366146	insig	0.288356	0.591163	insig	-0.0642432	0.929156	insig	-0.487195	0.230225	insig	0.348484	0.212343	insig	0.848711	0.0663276	insig	0.0944573	0.811748	insig	-1.57636	0.000248165	up	-0.849664	0.00927136	insig	0.295571	0.504619	insig
0.127551	0.809218	insig	0.0304107	0.975469	insig	0.156417	0.774558	insig	-0.119428	0.96796	insig	-0.0978762	0.992802	insig	-0.00076427	0.998826	insig	PB.520	-0.589526	0.0228352	insig	-0.0839356	0.809532	insig	-0.750591	2.59332e-05	insig	0.511717	0.103554	insig	0.661906	0.00379064	insig	0.163185	0.720344	insig	-2.82818	7.50892e-25	up	-2.10306	1.92465e-13	up	-2.75689	1.26504e-09	up	-1.94995	1.0591e-12	up
0.129128	0.693636	insig	-0.504674	0.374953	insig	-0.891368	0.000459597	insig	-0.654402	0.615025	insig	0.417959	0.869167	insig	1.04948	0.00010893	up	PB.521	-0.076935	0.969508	insig	-0.55916	0.0500368	insig	0.0111085	0.980469	insig	-0.476701	0.259025	insig	-0.57535	0.0422799	insig	-0.0857016	0.914973	insig	1.03142	1.46651e-06	down	1.24347	1.9306e-05	down	1.04771	0.0226502	down	0.0992402	0.754443	insig
0.649265	0.0817667	insig	-0.255795	0.710802	insig	0.581303	0.387845	insig	-0.923232	0.318855	insig	-0.804853	0.761251	insig	0.0897271	0.933169	insig	PB.522	0.729206	0.646426	insig	-0.255262	0.73467	insig	-1.63755	0.00878773	down	-0.977343	0.182349	insig	1.37672	0.0089873	up	2.36564	0.0011688	up	2.59688	7.07762e-12	down	2.52265	4.36063e-10	down	2.55812	7.51453e-09	down	4.7925	6.39829e-13	down
0.330017	0.301367	insig	1.554	0.000784867	up	2.10828	3.43705e-12	up	1.2009	0.123693	insig	-0.527711	0.792109	insig	-1.74642	1.84694e-07	down	PB.523	1.21276	0.312905	insig	2.07761	2.97386e-11	up	2.46692	4.10129e-16	up	0.867269	0.352682	insig	-0.393756	0.202807	insig	-1.24656	0.130928	insig	0.818522	0.00572054	insig	-0.0565693	0.942539	insig	0.252623	0.638942	insig	0.42793	0.235757	insig
-0.440659	0.0428537	insig	-1.02002	0.0390797	down	-1.06246	0.00560354	down	-0.597958	0.656273	insig	0.0747995	0.993405	insig	0.646187	0.152929	insig	PB.526	-0.189108	0.778145	insig	-0.129519	0.542667	insig	-0.580541	0.00671946	insig	0.0653761	0.866559	insig	0.446016	0.0350134	insig	0.393825	0.317415	insig	-0.208806	0.217695	insig	-0.454995	0.0570604	insig	-1.13732	0.00930539	up	-0.71882	0.136125	insig
0.101451	0.679819	insig	0.117878	0.718238	insig	-0.194688	0.448925	insig	-0.00435418	0.997482	insig	0.342236	0.739054	insig	0.325298	0.190727	insig	PB.528	0.122259	0.947478	insig	0.363527	0.25217	insig	0.69195	0.0233995	insig	0.245937	0.553907	insig	-0.333424	0.139817	insig	-0.566483	0.218347	insig	2.24681	3.0382e-28	down	2.23189	1.31274e-24	down	1.96148	2.31978e-21	down	1.32909	6.35859e-10	down
1.21624	0.0491009	up	1.48495	0.12625	insig	1.87162	8.2328e-05	up	0.247581	0.95175	insig	-0.36103	0.958906	insig	-0.627204	0.275207	insig	PB.529	0.24002	0.84914	insig	0.60629	0.0519861	insig	-1.62321	0.000593432	down	0.371604	0.25632	insig	2.22463	1.18755e-08	up	1.86834	0.000251653	up	-5.32518	1.05403e-61	up	-4.34341	2.13297e-37	up	-4.48702	7.39725e-15	up	-1.86473	0.000269167	up
0.325538	0.457005	insig	-0.129957	0.869693	insig	1.76493	8.0413e-06	up	-0.476547	0.809641	insig	-1.86378	0.0109101	down	-1.40725	0.00154408	down	PB.530	-0.983849	0.0706616	insig	-0.979131	0.00370175	insig	-2.02302	3.40138e-10	down	0.0120509	0.988222	insig	1.03969	1.10981e-05	up	1.03944	0.00362731	up	-4.53433	8.95943e-55	up	-3.21763	1.3496e-21	up	-3.72459	1.14922e-20	up	-0.778454	0.0707309	insig
-2.37749	0.615195	insig	2.79855	0.465216	insig	2.77084	0.297136	insig	5.16152	0.46911	insig	0.0506727	0.997704	insig	-5.12885	0.051935	insig	PB.531	2.08605	0.604665	insig	3.06876	0.0172407	up	4.78938	1.25142e-08	up	0.985444	0.661544	insig	-1.72469	0.054083	insig	-2.6917	0.0324015	down	-0.113524	0.965861	insig	-4.57274	0.0661879	insig	-0.441301	0.848854	insig	-2.17241	0.16832	insig
-0.699811	0.0493718	insig	-0.47797	0.596612	insig	-0.269117	0.584407	insig	0.201304	0.952169	insig	-0.181293	0.98483	insig	-0.40504	0.401857	insig	PB.534	0.538533	0.730879	insig	-0.775621	0.125302	insig	-0.963133	0.0837813	insig	-1.30877	0.000655635	down	0.181315	0.663208	insig	1.50183	0.000417579	up	2.1814	1.05772e-08	down	0.946458	0.00727405	insig	2.44013	0.000112218	down	2.84519	4.24624e-13	down
0.353497	0.202962	insig	0.6828	0.110468	insig	0.132459	0.761393	insig	0.308827	0.795247	insig	0.580334	0.660585	insig	0.250673	0.5285	insig	PB.535	-0.0810711	0.947123	insig	-0.56614	0.103964	insig	0.400086	0.0230418	insig	-0.481056	0.361913	insig	-0.971114	0.00365583	insig	-0.478341	0.117934	insig	-0.184289	0.447578	insig	0.255626	0.300065	insig	1.02414	0.0133695	down	-0.48454	0.14077	insig
-0.191869	0.710799	insig	-0.183455	0.839362	insig	0.89809	0.0229395	insig	-0.0106767	0.997946	insig	-1.0555	0.361076	insig	-1.0672	0.000757557	down	PB.537	-0.0800864	0.982334	insig	0.75919	0.0819719	insig	0.520627	0.30111	insig	0.841937	0.220893	insig	0.233246	0.612742	insig	-0.596231	0.544983	insig	3.60069	4.024e-24	down	3.4927	1.00777e-17	down	2.61964	3.80848e-07	down	3.9479	1.52949e-64	down
-0.370209	0.277721	insig	-0.23618	0.746355	insig	-0.0737823	0.891696	insig	0.113214	0.965207	insig	-0.134566	0.985511	insig	-0.270797	0.564607	insig	PB.538	0.0363309	0.989342	insig	0.0662383	0.898482	insig	-0.223756	0.598552	insig	0.0358438	0.958382	insig	0.284432	0.239719	insig	0.261268	0.565767	insig	0.899653	0.00323108	insig	0.499191	0.114315	insig	0.559172	0.281569	insig	1.02152	0.00543576	down
-0.312401	0.519126	insig	-0.454229	0.605683	insig	0.277942	0.61007	insig	-0.162727	0.955163	insig	-0.699588	0.740002	insig	-0.561438	0.0601834	insig	PB.539	-0.255855	0.890697	insig	0.0692165	0.90757	insig	-0.0217743	0.972875	insig	0.32853	0.348584	insig	0.0851494	0.807888	insig	-0.23031	0.662753	insig	1.12262	0.00683383	down	1.0721	3.81304e-05	down	0.559299	0.358086	insig	1.39155	1.60157e-06	down
0.530333	0.0940879	insig	0.810618	0.082306	insig	-0.0367515	0.933504	insig	0.258555	0.899633	insig	0.879443	0.368814	insig	0.598545	0.125667	insig	PB.544	0.257745	0.7753	insig	0.469717	0.074759	insig	0.957752	8.74651e-05	insig	0.217179	0.500531	insig	-0.493311	0.00765641	insig	-0.698462	0.00728041	insig	-0.5782	0.0145349	insig	-0.299453	0.391914	insig	-0.276594	0.540369	insig	-1.60132	2.18307e-08	up
NA	NA	insig	NA	NA	insig	NA	NA	insig	NA	NA	insig	NA	NA	insig	NA	NA	insig	PB.547	-0.601286	0.802115	insig	0.458314	0.513198	insig	-0.204276	0.843148	insig	1.06553	0.264362	insig	0.658286	0.379688	insig	-0.395763	0.837492	insig	-7.71395	6.75491e-08	up	-7.33396	0.000330565	up	-8.41146	1.439e-08	up	-7.69925	1.39806e-05	up
0.258138	0.412526	insig	0.10041	0.908209	insig	-0.300339	0.25941	insig	-0.179248	0.95175	insig	0.432778	0.898958	insig	0.589514	0.0407196	insig	PB.549	-0.160364	0.771111	insig	0.29596	0.174881	insig	0.138922	0.542575	insig	0.461548	0.0750309	insig	0.152009	0.54585	insig	-0.296446	0.360983	insig	-1.2548	1.79176e-11	up	-0.829464	0.00226282	insig	-1.49052	0.00535186	up	-1.72386	2.36012e-20	up
-0.364668	0.162761	insig	-0.754368	0.0447072	insig	-0.43558	0.121698	insig	-0.410213	0.597135	insig	-0.288259	0.860957	insig	0.0987609	0.75665	insig	PB.550	0.0225584	0.988993	insig	0.150388	0.496336	insig	-0.372421	0.0973829	insig	0.134076	0.68983	insig	0.518046	0.00522322	insig	0.397033	0.264236	insig	-0.648224	0.00233047	insig	-1.02926	1.08876e-06	up	-1.59374	4.16975e-10	up	-0.742041	0.00221287	insig
0.402329	0.165633	insig	0.573986	0.167176	insig	0.687427	0.00287892	insig	0.149327	0.93335	insig	-0.0852049	0.985511	insig	-0.254508	0.440903	insig	PB.551	-0.007815	0.996378	insig	0.177115	0.382997	insig	0.099474	0.661315	insig	0.19048	0.460538	insig	0.0726629	0.704922	insig	-0.104837	0.799471	insig	-1.03879	3.54192e-08	up	-0.622203	0.0224339	insig	-0.683477	0.0287486	insig	-0.481298	0.00420599	insig
0.496212	0.550258	insig	1.14694	0.310153	insig	1.60061	0.0215022	up	0.62504	0.854677	insig	-0.429875	0.955822	insig	-1.07182	0.116336	insig	PB.552	0.627898	0.623376	insig	0.806352	0.036823	insig	0.469747	0.26847	insig	0.183529	0.851382	insig	0.331995	0.425172	insig	0.162752	0.884184	insig	-2.05211	2.58116e-05	up	-2.17479	0.000166146	up	-1.75752	0.0116442	up	-0.951143	0.0943595	insig
-0.532108	0.0462705	insig	-0.65486	0.273085	insig	-0.653387	0.0381911	insig	-0.142766	0.952187	insig	0.0283116	0.994259	insig	0.147749	0.705414	insig	PB.553	1.41256	0.000721766	up	1.2801	0.000912753	up	0.464643	0.484836	insig	-0.126214	0.873602	insig	0.810789	0.112873	insig	0.948466	0.211897	insig	3.53328	1.87538e-44	down	1.59606	2.69569e-10	down	1.56155	0.00215697	down	2.38884	2.12621e-09	down
0.313834	0.175223	insig	0.859309	0.0260152	insig	0.279399	0.370063	insig	0.524482	0.553598	insig	0.609129	0.595357	insig	0.0639737	0.885561	insig	PB.554	0.0926127	0.939676	insig	-0.345311	0.395851	insig	0.63474	0.000878318	insig	-0.434695	0.459257	insig	-0.985208	0.00644916	insig	-0.539357	0.137538	insig	-0.0549423	0.780672	insig	0.171902	0.523981	insig	1.10907	0.0099313	down	-0.441837	0.14179	insig
0.178649	0.668539	insig	0.147707	0.862866	insig	-0.0950825	0.843556	insig	-0.0516999	0.989455	insig	0.274645	0.955822	insig	0.301868	0.306271	insig	PB.555	-0.662936	0.0339524	insig	-0.184451	0.4854	insig	-0.449799	0.112155	insig	0.483867	0.109604	insig	0.260491	0.348652	insig	-0.210105	0.746047	insig	-1.08687	7.52649e-05	up	-0.237635	0.458405	insig	-0.793726	0.12443	insig	-0.761491	0.00590492	insig
-1.35652	0.00744813	down	-1.64845	0.0400853	down	-0.909814	0.127572	insig	-0.312506	0.936267	insig	-0.712131	0.863549	insig	-0.424118	0.634162	insig	PB.557	0.26872	0.90936	insig	-0.115317	0.905935	insig	-0.997866	0.130298	insig	-0.380627	0.711206	insig	0.876833	0.228238	insig	1.27106	0.0549128	insig	3.6603	1.60919e-21	down	2.04068	6.38766e-05	down	2.08994	0.00708961	down	3.71858	8.71263e-09	down
-0.748891	0.00472002	insig	-0.903366	0.118697	insig	-0.856186	0.00375418	insig	-0.174867	0.945909	insig	-0.0199789	0.99657	insig	0.132523	0.767627	insig	PB.558	0.0189998	0.995535	insig	-0.136381	0.707127	insig	0.00317088	0.993766	insig	-0.149269	0.819729	insig	-0.144992	0.519088	insig	0.015561	0.9844	insig	1.86199	3.38109e-16	down	1.09967	0.00153819	down	1.0568	0.0336088	down	0.973916	0.00126336	insig
-0.217689	0.76126	insig	-0.458966	0.698724	insig	0.959643	0.0671987	insig	-0.260362	0.951968	insig	-1.39634	0.483035	insig	-1.15822	0.028294	down	PB.559	-0.112852	0.979758	insig	0.587811	0.163646	insig	-1.14263	0.0132672	down	0.711037	0.486237	insig	1.72601	1.86068e-05	up	1.02737	0.326508	insig	-1.45462	0.000386416	up	-1.55526	0.0307008	up	-2.54251	0.000393738	up	0.617744	0.22649	insig
0.404857	0.219293	insig	0.495092	0.490995	insig	-0.117627	0.71302	insig	0.0680324	0.987897	insig	0.643322	0.770058	insig	0.553493	0.0970362	insig	PB.562	-0.30215	0.468328	insig	-0.0747479	0.822577	insig	0.00336172	0.990979	insig	0.23303	0.524836	insig	-0.082884	0.759912	insig	-0.303363	0.388204	insig	-1.31818	1.20001e-11	up	-0.603931	0.0639228	insig	-0.789325	0.167158	insig	-1.46839	4.5151e-18	up
0.485604	0.089641	insig	0.939806	0.124709	insig	1.3486	2.74181e-05	up	0.432582	0.829761	insig	-0.378701	0.922255	insig	-0.833164	0.00841026	insig	PB.564	-0.0966439	0.948286	insig	0.199036	0.504889	insig	0.477922	0.063148	insig	0.301192	0.374895	insig	-0.283728	0.162727	insig	-0.572015	0.141813	insig	-0.495816	0.0468855	insig	0.0938501	0.767564	insig	0.202697	0.740624	insig	0.343557	0.332804	insig
-0.356228	0.0777751	insig	-0.520221	0.232003	insig	-0.81292	3.65812e-05	insig	-0.184672	0.909995	insig	0.32072	0.874173	insig	0.484016	0.0160318	insig	PB.565	-0.352252	0.341942	insig	-0.844805	0.000364487	insig	-0.0760953	0.843148	insig	-0.487657	0.191555	insig	-0.773633	0.0126612	insig	-0.272805	0.593898	insig	0.842073	6.72454e-08	insig	0.844195	4.41618e-05	insig	1.12729	0.00338475	down	0.0737851	0.821087	insig
1.07117	0.0959362	insig	1.98175	0.0883189	insig	0.906606	0.341944	insig	0.884713	0.795247	insig	1.10003	0.810442	insig	0.197971	0.869294	insig	PB.566	0.183539	0.970002	insig	0.0981481	0.926809	insig	1.73349	0.0189202	up	-0.0845518	0.944994	insig	-1.64221	0.000118597	down	-1.54466	0.031792	down	-1.26108	0.0668866	insig	-0.367137	0.562399	insig	0.575152	0.581644	insig	-2.11999	0.00710502	up
-0.348557	0.416138	insig	-0.400044	0.565447	insig	-0.411442	0.337353	insig	-0.0720182	0.98126	insig	0.0398415	0.993405	insig	0.0893785	0.884732	insig	PB.568	-0.427719	0.693864	insig	-0.163625	0.691314	insig	-0.0663676	0.885106	insig	0.270496	0.675548	insig	-0.102421	0.773791	insig	-0.360125	0.639388	insig	-0.942553	0.000943467	insig	-0.857706	0.0589323	insig	-1.22094	0.00578023	up	-1.31848	4.22618e-05	up
0.398892	0.115979	insig	0.20876	0.809189	insig	-0.619887	0.0246891	insig	-0.209118	0.942777	insig	0.861209	0.663238	insig	1.04667	8.43103e-06	up	PB.569	-0.225044	0.752573	insig	-0.110092	0.77189	insig	-0.138278	0.608209	insig	0.119676	0.832377	insig	0.023162	0.95155	insig	-0.0842607	0.893385	insig	-0.473625	0.020536	insig	0.155906	0.591465	insig	-0.193778	0.788971	insig	-0.985664	8.39977e-05	insig
-0.412444	0.122217	insig	-0.839454	0.0458581	insig	-0.583417	0.033373	insig	-0.448703	0.704885	insig	-0.228347	0.945876	insig	0.19932	0.605699	insig	PB.570	-0.440785	0.400433	insig	-0.131025	0.722642	insig	-0.612526	0.0453506	insig	0.315024	0.389957	insig	0.476265	0.0850119	insig	0.17515	0.765588	insig	-0.466026	0.0347718	insig	-0.431513	0.131288	insig	-1.21386	0.00066697	up	-0.46679	0.147434	insig
0.0714516	0.922976	insig	0.292266	0.778398	insig	0.5573	0.414687	insig	0.199717	0.945195	insig	-0.238714	0.974346	insig	-0.457671	0.437264	insig	PB.571	-0.936718	0.347486	insig	0.747465	0.193983	insig	0.199625	0.785088	insig	1.68824	0.00073758	up	0.542699	0.244431	insig	-1.13154	0.0315285	down	-1.14731	0.0283929	up	-0.134458	0.804642	insig	-1.64544	0.00402233	up	-0.822338	0.0830859	insig
1.72817	0.00184553	up	2.61105	1.13324e-05	up	5.21812	3.31339e-13	up	0.859564	0.534795	insig	-2.57801	0.0319005	down	-3.45339	7.43311e-06	down	PB.572	1.56292	0.801738	insig	2.39356	0.0549313	insig	3.92829	0.00222138	up	0.834197	0.678545	insig	-1.53715	8.80385e-06	down	-2.35494	0.106055	insig	1.87785	0.0798303	insig	2.05501	0.0537371	insig	2.05681	2.50303e-07	down	3.13497	0.000230866	down
-0.478732	0.101606	insig	-0.34522	0.590347	insig	0.363815	0.407261	insig	0.113514	0.965934	insig	-0.680944	0.741857	insig	-0.818463	0.0628407	insig	PB.573	0.0668259	0.98448	insig	0.0720206	0.921071	insig	-0.185814	0.791712	insig	0.00914821	0.989327	insig	0.251701	0.389793	insig	0.255511	0.549561	insig	0.97685	0.00649774	insig	0.43584	0.173426	insig	0.521733	0.328289	insig	1.49768	0.000464569	down
0.879317	0.197554	insig	1.79376	0.0129213	up	1.14324	0.114662	insig	0.89376	0.584178	insig	0.680443	0.821309	insig	-0.231908	0.819623	insig	PB.574	0.212319	0.960713	insig	0.249268	0.810518	insig	0.838641	0.318379	insig	0.0434552	0.977738	insig	-0.593495	0.393558	insig	-0.6252	0.535889	insig	-0.972483	0.127399	insig	-0.301815	0.677619	insig	0.526334	0.434277	insig	-0.703326	0.324219	insig
1.01826	0.00228531	up	1.69068	0.00864301	up	2.08037	7.12947e-11	up	0.649782	0.774987	insig	-0.361661	0.947039	insig	-1.0299	0.0214938	down	PB.576	-0.431691	0.430454	insig	-0.192452	0.515807	insig	0.377207	0.166391	insig	0.245813	0.415772	insig	-0.57415	0.000145952	insig	-0.807534	0.00344033	insig	-2.79441	1.95405e-44	up	-1.33826	0.000179193	up	-0.956064	0.113839	insig	-1.12388	0.00287302	up
-0.937622	0.00830561	insig	-0.854324	0.120592	insig	-0.440891	0.240736	insig	0.0644972	0.982859	insig	-0.382651	0.872983	insig	-0.470297	0.215221	insig	PB.577	0.568342	0.383748	insig	1.04784	0.0075671	up	-0.600264	0.033671	insig	0.487118	0.486237	insig	1.64292	1.50635e-05	up	1.16918	0.000469921	up	-0.30187	0.333018	insig	-1.80399	1.79481e-07	up	-2.24435	4.98517e-06	up	-0.176063	0.536984	insig
0.115913	0.654005	insig	0.230573	0.539929	insig	-0.16729	0.607618	insig	0.0930859	0.943488	insig	0.426377	0.719523	insig	0.311727	0.330861	insig	PB.578	-0.199016	0.819528	insig	-0.780755	0.00235017	insig	0.253884	0.217491	insig	-0.576637	0.15598	insig	-1.03966	0.000102675	down	-0.452207	0.214443	insig	-0.314994	0.0720022	insig	0.00596283	0.985763	insig	0.656093	0.0523479	insig	-0.764799	0.00649408	insig
0.688843	0.379794	insig	1.19292	0.232857	insig	2.07722	0.00286415	up	0.4848	0.7738	insig	-0.858038	0.527509	insig	-1.36316	0.000556062	down	PB.579	-0.41746	0.945933	insig	0.10952	0.950904	insig	5.66536	1.62072e-52	up	0.532814	0.833299	insig	-5.56184	1.22999e-26	down	-6.06664	2.19569e-28	down	2.74362	0.000250863	down	3.84666	1.14243e-09	down	3.78379	2.0729e-08	down	-0.87862	0.0250367	insig
-0.357555	0.486964	insig	-0.547039	0.504235	insig	-0.943413	0.0513899	insig	-0.208361	0.943488	insig	0.429604	0.924416	insig	0.61114	0.208465	insig	PB.581	-0.156208	0.966485	insig	0.531803	0.387399	insig	-0.332306	0.657508	insig	0.69413	0.409602	insig	0.8589	0.122285	insig	0.178297	0.910952	insig	1.22667	0.00349705	down	1.03242	0.0549202	insig	0.110488	0.88856	insig	0.587181	0.243643	insig
0.526873	0.0883306	insig	0.985852	0.00256879	insig	0.937668	0.00507624	insig	0.43628	0.693315	insig	0.0770945	0.992422	insig	-0.377565	0.434596	insig	PB.584	-0.7627	0.303592	insig	-0.415365	0.140849	insig	0.0932179	0.815895	insig	0.35011	0.638586	insig	-0.513825	0.108245	insig	-0.849485	0.186285	insig	-0.302722	0.152695	insig	0.993161	0.024392	insig	1.05794	0.000446654	down	0.507613	0.216226	insig
0.0482676	0.941118	insig	-0.968304	0.332652	insig	-0.478934	0.275928	insig	-1.03529	0.711345	insig	-0.45871	0.946319	insig	0.551846	0.372664	insig	PB.586	0.83102	0.405322	insig	0.19554	0.812375	insig	0.483697	0.517026	insig	-0.629773	0.417622	insig	-0.293618	0.671014	insig	0.346977	0.71813	insig	2.67349	3.07102e-13	down	1.89517	0.000170405	down	1.47303	0.0917432	insig	1.6812	0.00024958	down
-0.603762	0.163498	insig	0.567369	0.436098	insig	0.027181	0.970723	insig	1.14771	0.3477	insig	0.568034	0.869167	insig	-0.596041	0.362177	insig	PB.587	0.940486	0.443008	insig	0.894949	0.0768639	insig	1.91288	3.24703e-05	up	-0.042197	0.976238	insig	-1.02274	0.019532	down	-0.968069	0.250696	insig	2.28156	8.77783e-10	down	0.74259	0.19159	insig	1.9101	0.000294145	down	0.361622	0.570527	insig
-0.297975	0.343681	insig	-0.521697	0.511038	insig	-0.569084	0.133051	insig	-0.242157	0.934142	insig	0.0816196	0.993405	insig	0.29877	0.468526	insig	PB.589	-0.249419	0.934207	insig	-0.00549681	0.996481	insig	0.348347	0.605164	insig	0.248644	0.76579	insig	-0.358031	0.399603	insig	-0.594264	0.359461	insig	1.55759	2.68532e-05	down	1.51501	4.3483e-06	down	1.00353	0.127583	insig	0.608086	0.0946227	insig
0.297292	0.758981	insig	2.6219	0.00809755	up	1.529	0.0986691	insig	2.30246	0.0995428	insig	1.11812	0.777057	insig	-1.19826	0.211904	insig	PB.590	0.707269	0.71588	insig	1.09279	0.112126	insig	2.84865	1.81515e-10	up	0.386753	0.786372	insig	-1.76115	0.00430039	down	-2.13674	0.00388824	down	-0.345245	0.625402	insig	-0.752572	0.353371	insig	1.14302	0.207066	insig	-1.70221	0.0448532	up
1.41748	0.145203	insig	3.80409	9.60647e-05	up	2.14459	0.00370288	up	2.36083	0.0995428	insig	1.67929	0.233183	insig	-0.695485	0.394047	insig	PB.591	0.544658	0.71588	insig	-0.0449444	0.96689	insig	1.06556	0.0375966	up	-0.584897	0.545142	insig	-1.11514	0.0519473	insig	-0.518701	0.438873	insig	-2.4979	0.000176577	up	-1.6211	0.0207418	up	1.30721	0.112497	insig	-1.44737	2.66687e-05	up
3.0183	4.75567e-05	up	4.08011	1.03632e-05	up	2.69254	0.0011242	up	1.03492	0.691127	insig	1.41534	0.583146	insig	0.364711	0.740471	insig	PB.592	1.52973	0.0670957	insig	-0.121555	0.910317	insig	1.11501	0.125099	insig	-1.64439	0.000815919	down	-1.24084	0.0132185	down	0.415697	0.569327	insig	-3.192	2.24863e-06	up	-1.69534	0.00251321	up	0.962103	0.245707	insig	-1.64603	0.0166869	up
1.56779	0.0935897	insig	2.97878	0.0106047	up	2.08966	0.0605034	insig	1.38909	0.447731	insig	0.914126	0.848379	insig	-0.491746	0.672504	insig	PB.593	0.763284	0.42938	insig	0.731759	0.122052	insig	1.2209	0.009788	up	-0.0265189	0.979034	insig	-0.494314	0.22421	insig	-0.454917	0.588755	insig	-1.22815	0.158351	insig	-0.420143	0.498807	insig	0.973285	0.194447	insig	-0.397457	0.695458	insig
-1.05326	0.000398287	down	-0.726826	0.389661	insig	-0.657765	0.0506359	insig	0.306228	0.925956	insig	-0.0425382	0.99375	insig	-0.37017	0.324434	insig	PB.594	0.40865	0.744558	insig	0.526773	0.184569	insig	-0.0909007	0.877523	insig	0.123185	0.796666	insig	0.611955	0.0080869	insig	0.501893	0.226159	insig	2.4991	2.89466e-16	down	1.04078	0.000308087	down	1.20641	0.0772452	insig	1.90036	1.49185e-10	down
1.48931	0.021476	up	4.05482	0.000269496	up	2.77073	4.58824e-05	up	2.53959	0.303644	insig	1.31358	0.782323	insig	-1.24019	0.201993	insig	PB.595	-0.098807	0.977966	insig	-1.16194	0.0133181	down	0.176666	0.81709	insig	-1.05424	0.0337144	down	-1.34282	7.1108e-05	down	-0.277599	0.747805	insig	-2.55933	6.48853e-10	up	-0.96435	0.188959	insig	2.60857	0.0128565	down	0.00042696	0.99961	insig
1.38486	0.0592885	insig	3.9417	0.000426958	up	2.7992	1.85301e-05	up	2.53255	0.311554	insig	1.17046	0.818048	insig	-1.37749	0.14798	insig	PB.596	0.397836	0.803916	insig	0.973755	4.88712e-05	insig	1.56154	1.85102e-10	up	0.57997	0.339821	insig	-0.592584	0.00832946	insig	-1.15905	0.0474275	down	-1.75166	2.75471e-06	up	-0.760654	0.375714	insig	1.16491	0.302543	insig	-0.550877	0.494852	insig
0.435246	0.167518	insig	0.106692	0.941979	insig	-0.918529	0.0147232	insig	-0.349284	0.942313	insig	1.06042	0.783266	insig	1.38388	0.00120658	up	PB.597	0.0637806	0.976614	insig	0.542714	0.0702012	insig	0.674703	0.0359608	insig	0.482609	0.0609855	insig	-0.13763	0.431924	insig	-0.606954	0.0440447	insig	-0.479496	0.0635658	insig	-0.102112	0.800441	insig	-0.954472	0.345853	insig	-2.10013	1.95358e-07	up
0.248518	0.317394	insig	-0.517912	0.596775	insig	-0.886058	0.0295636	insig	-0.785363	0.759175	insig	0.404284	0.955822	insig	1.16189	0.005387	up	PB.598	0.304339	0.833448	insig	0.544682	0.119511	insig	0.799035	0.0446809	insig	0.243088	0.598887	insig	-0.260163	0.379309	insig	-0.489083	0.312556	insig	-0.327997	0.251825	insig	-0.378041	0.203142	insig	-1.42607	0.0564708	insig	-2.04068	1.21173e-05	up
-0.041144	0.93968	insig	-0.814495	0.447414	insig	-1.05603	0.0531369	insig	-0.792388	0.82235	insig	0.280201	0.983195	insig	1.04386	0.116557	insig	PB.599	0.208742	0.899816	insig	0.486992	0.12586	insig	0.333406	0.42828	insig	0.282127	0.292857	insig	0.147938	0.52772	insig	-0.120425	0.81616	insig	-0.498636	0.0974614	insig	-0.744098	0.0799789	insig	-1.83625	0.0277539	up	-1.91595	0.00139734	up
1.68919	0.11847	insig	3.60105	0.00157796	up	1.56081	0.0903697	insig	1.88724	0.608321	insig	2.07135	0.463339	insig	0.169619	0.935056	insig	PB.600	-0.641305	0.773507	insig	0.39417	0.478323	insig	-0.139264	0.852548	insig	1.04029	0.144081	insig	0.529783	0.0206744	insig	-0.494988	0.624533	insig	-4.82812	1.02041e-24	up	-2.49411	0.0167224	up	-1.66955	0.0872128	insig	-3.16528	1.04629e-05	up
0.152455	0.607752	insig	-0.290824	0.727809	insig	-0.61194	0.0274487	insig	-0.462388	0.844638	insig	0.353789	0.943073	insig	0.791498	0.00130849	insig	PB.601	0.00859926	0.997215	insig	0.0938093	0.819567	insig	-0.282458	0.294075	insig	0.0922003	0.869824	insig	0.371582	0.183559	insig	0.292865	0.440034	insig	-1.95752	2.84146e-22	up	-1.80777	3.28587e-17	up	-2.38224	1.41153e-05	up	-2.31747	2.28464e-23	up
NA	NA	insig	NA	NA	insig	NA	NA	insig	NA	NA	insig	NA	NA	insig	NA	NA	insig	PB.602	-0.266177	0.86486	insig	-0.164048	0.781753	insig	-0.0410477	0.944949	insig	0.108618	0.908025	insig	-0.127785	0.813413	insig	-0.223288	0.811621	insig	-9.41391	3.4327e-13	up	-9.37301	8.21005e-11	up	-9.48926	8.5334e-12	up	-9.56497	2.47953e-12	up
0.288775	0.181464	insig	0.300143	0.646963	insig	-0.431929	0.179898	insig	-0.00876525	0.998053	insig	0.764142	0.649917	insig	0.748415	0.0158872	insig	PB.603	0.590861	0.029989	insig	-0.580036	0.0207352	insig	0.739881	0.000691072	insig	-1.16474	2.45638e-05	down	-1.32485	1.92921e-07	down	-0.146631	0.766474	insig	-0.223447	0.200272	insig	-0.519507	0.0192018	insig	0.616312	0.245261	insig	-1.42433	2.22634e-05	up
0.796728	0.129901	insig	0.768742	0.499604	insig	0.115862	0.859601	insig	-0.0479942	0.993728	insig	0.689286	0.896523	insig	0.714026	0.229183	insig	PB.605	-0.0348386	0.99047	insig	0.590521	0.23657	insig	0.453583	0.209401	insig	0.629598	0.423197	insig	0.132376	0.816877	insig	-0.4841	0.472578	insig	-2.63173	2.84289e-17	up	-1.79268	0.000397212	up	-2.48989	0.0015065	up	-3.0005	2.11422e-21	up
-0.157311	0.685463	insig	1.97735	0.0223561	up	1.38396	0.000189157	up	2.11403	0.135276	insig	0.617585	0.904264	insig	-1.51416	4.63072e-05	down	PB.609	-0.813982	0.457516	insig	-0.717307	0.251824	insig	-1.09547	0.0446809	down	0.102611	0.927192	insig	0.371985	0.516448	insig	0.283606	0.662991	insig	-2.14538	9.24926e-09	up	-1.48662	1.38651e-05	up	0.507226	0.608967	insig	0.296403	0.545808	insig
2.5011	5.40403e-06	up	4.51319	4.45824e-05	up	3.83011	2.84832e-07	up	1.9853	0.472321	insig	0.706621	0.943073	insig	-1.29331	0.182804	insig	PB.610	-0.136085	0.957977	insig	-0.632025	0.141946	insig	1.30486	2.27286e-06	up	-0.491145	0.562481	insig	-1.94152	3.07861e-07	down	-1.4369	0.00689373	down	-2.61642	1.89277e-12	up	0.0277417	0.971947	insig	2.47702	0.0193868	down	-0.126156	0.904701	insig
-0.480641	0.0767651	insig	-0.657759	0.297621	insig	-0.81436	0.0190055	insig	-0.197193	0.93882	insig	0.18383	0.978972	insig	0.358145	0.422556	insig	PB.611	0.573735	0.259904	insig	-0.0948421	0.804929	insig	0.358741	0.263122	insig	-0.662116	0.0947809	insig	-0.458585	0.13255	insig	0.215364	0.745653	insig	2.14495	5.76217e-27	down	1.09633	0.000277214	down	1.54376	0.00248201	down	0.944629	0.0186818	insig
0.081677	0.859097	insig	-0.560697	0.483185	insig	-1.0296	0.00685929	down	-0.663134	0.792806	insig	0.50409	0.913497	insig	1.1423	0.0245051	up	PB.612	-0.107101	0.92477	insig	0.139818	0.660376	insig	0.160447	0.595812	insig	0.252888	0.524877	insig	-0.0256574	0.941479	insig	-0.265027	0.522406	insig	-0.808677	1.06911e-06	insig	-0.614134	0.138715	insig	-1.54612	0.0131022	up	-2.02686	3.65165e-06	up
-0.890932	0.0156657	insig	-0.964823	0.142256	insig	-0.22134	0.680476	insig	-0.0941714	0.974877	insig	-0.71558	0.715423	insig	-0.644548	0.109333	insig	PB.613	0.527836	0.710203	insig	-0.042085	0.952804	insig	-0.644304	0.2397	insig	-0.564985	0.174882	insig	0.59606	0.0209387	insig	1.17263	0.00700573	up	1.06629	0.00731557	down	-0.347725	0.356449	insig	0.105495	0.870587	insig	1.46041	0.000161445	down
-0.345226	0.232022	insig	-0.0108368	0.988486	insig	-0.244742	0.382	insig	0.315009	0.865562	insig	0.261868	0.941968	insig	-0.0746259	0.853191	insig	PB.615	-0.0443689	0.983048	insig	0.196658	0.610342	insig	-0.0151471	0.973542	insig	0.247094	0.557597	insig	0.207323	0.452739	insig	-0.0276081	0.967064	insig	1.16121	1.24877e-06	down	0.865727	0.00256701	insig	0.915043	0.035084	insig	0.900088	1.62986e-05	insig
-0.280742	0.34099	insig	-0.395727	0.415558	insig	-0.109411	0.753117	insig	-0.136158	0.933655	insig	-0.257714	0.912039	insig	-0.143284	0.59133	insig	PB.616	-0.27988	0.668683	insig	0.142037	0.609687	insig	-0.242607	0.372911	insig	0.427152	0.0761947	insig	0.379678	0.0356459	insig	-0.0345742	0.956254	insig	-0.472396	0.0458924	insig	-0.466127	0.0556542	insig	-1.05093	0.000719437	up	-0.368658	0.0602661	insig
0.602532	0.0463293	insig	0.86173	0.339472	insig	-0.285352	0.38982	insig	0.237656	0.950127	insig	1.17903	0.581609	insig	0.918097	0.00188094	insig	PB.620	0.0988056	0.933997	insig	0.168586	0.674767	insig	0.255463	0.299074	insig	0.0737235	0.91002	insig	-0.0921534	0.811182	insig	-0.153782	0.723468	insig	-1.86696	7.1311e-20	up	-1.35654	3.26036e-07	up	-1.21449	0.105926	insig	-2.43731	1.11227e-26	up
-0.258116	0.2817	insig	-1.06154	0.0518286	insig	-1.30929	7.12303e-05	down	-0.822957	0.526237	insig	0.281319	0.956507	insig	1.07822	0.00433943	up	PB.621	-0.350294	0.394912	insig	0.145014	0.562161	insig	-0.55664	0.0470809	insig	0.501635	0.0330266	insig	0.696874	0.00602067	insig	0.209104	0.671741	insig	-0.171312	0.315667	insig	-0.0727784	0.812919	insig	-1.41582	0.00341	up	-0.95239	0.0302511	insig
-0.387661	0.585628	insig	-0.269102	0.803159	insig	0.849849	0.203599	insig	0.0986676	0.968003	insig	-1.08958	0.290487	insig	-1.209	0.00128091	down	PB.622	-0.3023	0.756101	insig	0.621312	0.021014	insig	0.0307769	0.947206	insig	0.928321	0.000417113	insig	0.585459	0.0128464	insig	-0.330201	0.550628	insig	-1.22494	0.016553	up	-1.30502	8.72012e-05	up	-2.15666	5.51693e-09	up	-0.439768	0.27923	insig
-0.0116585	0.979198	insig	-0.51371	0.120007	insig	-0.313641	0.464644	insig	-0.521219	0.579257	insig	-0.171258	0.972983	insig	0.324852	0.549912	insig	PB.623	2.01401	6.54829e-28	up	0.84806	5.12189e-06	insig	-0.51305	0.0370795	insig	-1.15959	1.67183e-07	down	1.35633	2.08112e-09	up	2.52802	2.92649e-21	up	1.17761	9.8271e-11	down	-0.842364	0.00823035	insig	-0.224544	0.471019	insig	1.35027	0.00139678	down
0.0257026	0.944705	insig	-0.264212	0.725624	insig	-0.869531	0.00113686	insig	-0.311117	0.899633	insig	0.635515	0.757684	insig	0.9242	0.000274519	insig	PB.624	-0.255892	0.646172	insig	-0.0812592	0.754788	insig	-0.483148	0.0109158	insig	0.180964	0.595476	insig	0.397136	0.0336525	insig	0.229062	0.565767	insig	-1.13323	1.06631e-08	up	-0.844123	0.000717833	insig	-1.35658	0.00722739	up	-1.54885	1.15579e-11	up
0.793942	0.0474476	insig	0.88685	0.124662	insig	1.18195	0.00338668	up	0.0737351	0.986958	insig	-0.271583	0.96437	insig	-0.367733	0.606326	insig	PB.625	-0.0757615	0.979758	insig	-0.382505	0.559036	insig	-0.241192	0.698349	insig	-0.299156	0.755905	insig	-0.146578	0.833992	insig	0.167765	0.836196	insig	-1.37662	1.88311e-06	up	-0.503723	0.327008	insig	-0.152245	0.84845	insig	0.0153174	0.982033	insig
-0.0495186	0.923282	insig	-0.134097	0.916098	insig	-1.13936	0.00339573	down	-0.101358	0.988686	insig	1.03902	0.751879	insig	1.11084	0.0348009	up	PB.626	0.683263	0.627846	insig	1.08121	0.032875	up	0.561059	0.397341	insig	0.405513	0.383442	insig	0.516534	0.08643	insig	0.125429	0.826781	insig	0.472564	0.262731	insig	-0.251304	0.622696	insig	-0.781068	0.39339	insig	-1.25446	0.00541398	up
-1.12996	0.000467694	down	-1.40574	0.00417845	down	-1.00765	0.00173273	down	-0.296174	0.871281	insig	-0.369377	0.860889	insig	-0.0956702	0.823735	insig	PB.627	0.242828	0.748156	insig	0.21055	0.427947	insig	-0.35684	0.0275052	insig	-0.02544	0.966291	insig	0.562697	0.0080218	insig	0.600604	0.0635176	insig	-0.166622	0.568171	insig	-1.53346	8.81796e-08	up	-1.82321	1.5352e-06	up	-0.848637	0.000143679	insig
2.63901	0.66526	insig	NA	NA	insig	4.88112	0.0623778	insig	-2.86285	0.899121	insig	-5.05275	0.482171	insig	-2.21343	0.300377	insig	PB.629	0.389831	0.939676	insig	0.229788	0.865739	insig	0.160137	0.914778	insig	-0.152737	0.926978	insig	0.0652469	0.950802	insig	0.232001	0.914169	insig	-6.59265	0.000116704	up	-4.34189	0.00502447	up	-7.0622	3.74701e-05	up	-1.90776	0.0464706	up
-0.437329	0.340089	insig	-1.18885	0.034881	down	-0.788469	0.0433726	insig	-0.771478	0.548922	insig	-0.367438	0.887733	insig	0.380933	0.417359	insig	PB.631	-0.557966	0.447453	insig	-0.697119	0.0300511	insig	-1.16112	0.0136393	down	-0.134756	0.842004	insig	0.458959	0.359944	insig	0.607979	0.465367	insig	-0.174005	0.642649	insig	-0.0480675	0.932027	insig	-0.705034	0.114208	insig	0.16247	0.752736	insig
1.53697	0.000708493	up	2.02581	0.0230488	up	0.390695	0.520223	insig	0.465498	0.908992	insig	1.66644	0.41407	insig	1.18248	0.0686679	insig	PB.632	-0.42917	0.702685	insig	-0.190187	0.792324	insig	-0.0126932	0.983723	insig	0.243891	0.796721	insig	-0.181827	0.762851	insig	-0.412566	0.417408	insig	-2.56101	1.51825e-17	up	-0.588272	0.281422	insig	-0.387646	0.704922	insig	-2.19175	1.94751e-05	up
1.26918	0.00517119	up	1.37426	0.00417845	up	2.66813	2.24657e-12	up	0.0865781	0.973851	insig	-1.2634	0.0525236	insig	-1.37649	0.00182682	down	PB.633	0.872316	0.63031	insig	-1.84957	0.0195904	down	-2.10717	0.00610037	down	-2.7166	3.00879e-05	down	0.251023	0.798662	insig	2.98106	1.48486e-11	up	-1.20369	0.033928	up	-0.804485	0.0807587	insig	1.97756	0.000915269	down	3.54039	6.6909e-18	down
1.9813	0.00281384	up	4.32835	0.00175402	up	3.51229	7.80881e-08	up	2.32222	0.437007	insig	0.839816	0.925407	insig	-1.50051	0.00300107	down	PB.638	0.0450073	0.994202	insig	1.94952	1.38672e-07	up	2.19579	1.09444e-15	up	1.90408	0.0329552	up	-0.251761	0.613705	insig	-2.14071	0.0112008	down	-2.89922	1.61275e-07	up	-0.952613	0.220465	insig	-0.566502	0.701645	insig	-1.61188	0.000964426	up
-0.665034	0.0300093	insig	-1.00674	0.019005	down	-0.41591	0.257973	insig	-0.361296	0.84234	insig	-0.561524	0.758974	insig	-0.22483	0.69178	insig	PB.639	0.034544	0.989546	insig	0.327029	0.605183	insig	-1.04265	5.37419e-06	down	0.300533	0.77418	insig	1.36476	0.00697963	up	1.07715	0.0194898	up	0.460386	0.0251671	insig	-0.233028	0.629546	insig	-0.912447	0.130844	insig	1.0591	0.00520407	down
0.482057	0.214434	insig	0.78559	0.43303	insig	0.00932121	0.985519	insig	0.283221	0.942777	insig	0.809598	0.80717	insig	0.50414	0.149527	insig	PB.641	0.208858	0.901587	insig	0.204293	0.490338	insig	0.532018	0.0230282	insig	-0.000432284	0.999646	insig	-0.332733	0.17576	insig	-0.318481	0.629089	insig	-0.717449	0.0137993	insig	-0.439193	0.302102	insig	-0.179004	0.852255	insig	-1.27322	1.69538e-08	up
-1.36435	0.00173549	down	-0.282087	0.791229	insig	-0.980552	0.000339476	insig	1.06479	0.660158	insig	0.723932	0.821309	insig	-0.363436	0.54032	insig	PB.644	0.481214	0.702905	insig	0.266313	0.599718	insig	-0.756312	0.195498	insig	-0.208686	0.745197	insig	1.01717	0.0187521	up	1.23677	0.0507737	insig	2.32264	3.97648e-14	down	0.480309	0.405266	insig	1.73606	0.0176011	down	2.06868	1.66707e-08	down
0.649787	0.043169	insig	0.376084	0.799568	insig	-0.00790312	0.987784	insig	-0.294202	0.955191	insig	0.417165	0.970735	insig	0.687816	0.0208761	insig	PB.645	0.823598	0.713256	insig	-1.01933	0.165814	insig	0.941716	0.217298	insig	-1.84521	0.00863557	down	-1.96817	7.13524e-06	down	-0.110753	0.923565	insig	0.048755	0.934154	insig	-0.121808	0.84199	insig	1.40357	0.207256	insig	-0.933293	0.00204622	insig
-1.49119	0.0431821	down	1.0016	0.400331	insig	1.2536	0.0237857	up	2.46829	0.21295	insig	-0.223277	0.986111	insig	-2.70863	3.19644e-05	down	PB.648	0.566842	0.901651	insig	0.677516	0.554597	insig	1.44067	0.0701644	insig	0.109401	0.959733	insig	-0.769022	0.370496	insig	-0.865917	0.533799	insig	0.814075	0.199526	insig	-1.23959	0.25215	insig	1.09255	0.3115	insig	0.591983	0.316769	insig
-0.257147	0.7204	insig	0.601372	0.516021	insig	-0.320048	0.696547	insig	0.83468	0.727561	insig	0.950168	0.758974	insig	0.0983225	0.938801	insig	PB.649	0.0603542	0.995219	insig	0.568349	0.597858	insig	1.84854	0.0389584	up	0.506436	0.779895	insig	-1.28658	0.0238162	down	-1.77944	0.205075	insig	1.22804	0.0610675	insig	0.913721	0.388984	insig	1.21682	0.0804871	insig	-0.974672	0.185817	insig
-0.752961	0.172854	insig	1.48175	0.244129	insig	0.323408	0.664989	insig	2.21484	NA	insig	1.18316	0.775299	insig	-1.04923	0.0380311	down	PB.651	1.95319	0.189079	insig	1.65206	0.0536826	insig	1.64756	0.137745	insig	-0.295462	0.765653	insig	-0.00210079	0.998035	insig	0.303594	0.814607	insig	4.01769	4.51695e-10	down	1.31268	0.00583489	down	3.80742	NA	insig	2.65757	3.54077e-06	down
0.842556	0.635183	insig	3.03806	0.00772724	up	6.01362	1.31996e-10	up	2.1727	0.425427	insig	-2.94662	0.0549893	insig	-5.13175	2.10776e-06	down	PB.652	0.189751	0.841703	insig	0.0525168	0.903866	insig	0.375974	0.190115	insig	-0.131692	0.785119	insig	-0.328685	0.240143	insig	-0.182796	0.664993	insig	-8.51122	1.88452e-86	up	-7.87259	9.86696e-13	up	-5.58288	1.0524e-30	up	-2.92639	0.00214799	up
-1.17646	0.00595037	down	-1.78178	0.012001	down	-1.69965	0.000101515	down	-0.624547	0.752108	insig	-0.046501	0.993405	insig	0.551186	0.152952	insig	PB.653	-0.331153	0.836645	insig	-1.10569	0.0036334	down	-0.17483	0.736155	insig	-0.770227	0.144081	insig	-0.936559	0.00403996	insig	-0.155526	0.830929	insig	3.08104	1.39804e-15	down	2.24095	2.66134e-11	down	2.36829	2.01747e-05	down	1.52516	8.49156e-07	down
-0.229127	0.420749	insig	-1.06632	0.0124931	down	-0.83168	0.0981742	insig	-0.856369	0.300341	insig	-0.205573	0.977034	insig	0.625217	0.297887	insig	PB.654	-0.153226	0.946366	insig	-0.526084	0.268223	insig	-0.393937	0.224044	insig	-0.366794	0.694907	insig	-0.137155	0.822913	insig	0.24111	0.792508	insig	1.07308	5.15159e-08	down	1.00283	0.0100935	down	0.495233	0.383148	insig	0.60812	0.3341	insig
-0.523467	0.05216	insig	-0.542515	0.373539	insig	-0.295825	0.348626	insig	-0.0393613	0.991284	insig	-0.219668	0.968727	insig	-0.202428	0.606326	insig	PB.655	-0.161677	0.874237	insig	-0.219749	0.41171	insig	-0.24975	0.394317	insig	-0.0526196	0.913311	insig	0.0248297	0.935273	insig	0.0906333	0.87718	insig	1.19183	2.04234e-09	down	0.835695	0.00215341	insig	0.830201	0.0962901	insig	1.1157	0.000151777	down
0.279759	0.670282	insig	0.807734	0.279544	insig	0.982732	0.210396	insig	0.504353	0.812112	insig	-0.148741	0.992422	insig	-0.669402	0.469994	insig	PB.656	-0.0262582	0.989546	insig	0.0480875	0.909248	insig	-0.455962	0.192438	insig	0.0798267	0.870409	insig	0.499021	0.0896895	insig	0.43258	0.378193	insig	-4.23701	5.04581e-52	up	-3.92615	1.26027e-35	up	-3.52021	2.70615e-20	up	-2.83562	2.84186e-05	up
-0.711746	0.0506664	insig	-0.269299	0.730553	insig	0.00926572	0.985383	insig	0.421826	0.846994	insig	-0.249639	0.958934	insig	-0.693298	0.035966	insig	PB.658	0.273281	0.890697	insig	0.45954	0.209004	insig	0.414707	0.344921	insig	0.191365	0.794912	insig	0.0402297	0.922576	insig	-0.138079	0.889771	insig	1.5723	2.27316e-07	down	0.59542	0.182431	insig	0.805783	0.139938	insig	1.13713	9.7136e-05	down
-0.580834	0.216416	insig	-0.444604	0.42633	insig	-0.743365	0.0335179	insig	0.117584	0.966196	insig	0.32834	0.913497	insig	0.187699	0.783372	insig	PB.660	-0.0534592	0.976032	insig	0.0638593	0.879311	insig	-0.246358	0.478204	insig	0.123631	0.822922	insig	0.305429	0.327692	insig	0.195257	0.779839	insig	-0.96245	0.000119796	insig	-1.48408	0.00140021	up	-1.51146	3.25589e-05	up	-1.49143	6.6939e-07	up
-1.27576	0.00405503	down	-0.8346	0.224133	insig	-0.590264	0.263369	insig	0.419019	0.697726	insig	-0.218596	0.943073	insig	-0.658082	0.00236558	insig	PB.661	-3.19669	0.00138446	down	-1.19661	0.567112	insig	-3.05869	0.000582539	down	2.01002	0.174936	insig	1.8592	0.270437	insig	-0.135742	0.927238	insig	0.580242	0.576063	insig	2.51243	3.97973e-14	down	0.904467	0.422605	insig	3.02589	2.40988e-18	down
-0.826799	0.0016147	insig	-0.650199	0.368868	insig	-0.620706	0.0466099	insig	0.156098	0.959081	insig	-0.00379804	0.999181	insig	-0.181434	0.703934	insig	PB.662	-0.325708	0.756533	insig	-0.483742	0.0484816	insig	-0.612701	0.0368985	insig	-0.151935	0.793897	insig	0.123894	0.683417	insig	0.287257	0.662558	insig	1.73132	2.69703e-18	down	1.23547	0.000193615	down	1.52555	0.00790298	down	1.69488	6.38431e-07	down
-0.332881	0.54995	insig	-0.150137	0.923111	insig	-0.408079	0.490339	insig	0.161948	0.975774	insig	0.291104	0.980857	insig	0.107874	0.781979	insig	PB.664	1.53194	0.694427	insig	-0.0611772	0.981657	insig	1.03095	0.625592	insig	-1.5889	0.490031	insig	-1.09994	0.56336	insig	0.492045	0.855211	insig	4.7566	2.31375e-05	down	2.89098	5.72657e-05	down	4.63113	0.00018507	down	3.28405	0.000915367	down
0.182991	0.705804	insig	0.747949	0.280737	insig	0.982397	0.0477894	insig	0.54206	0.793692	insig	-0.205412	0.978392	insig	-0.765411	0.168514	insig	PB.665	-0.129608	0.940868	insig	0.703537	0.0105131	insig	0.0702925	0.871819	insig	0.839367	0.000215725	insig	0.62896	0.000232731	insig	-0.196748	0.640308	insig	-2.00862	7.69983e-11	up	-1.68917	4.279e-07	up	-2.00834	2.40812e-05	up	-1.13081	0.0199678	up
2.14729	0.500578	insig	2.72308	0.572613	insig	3.09378	0.21387	insig	0.536828	0.962208	insig	-0.374128	0.992802	insig	-0.929956	0.65521	insig	PB.666	2.47244	0.0534934	insig	-0.292125	0.886711	insig	-2.09332	0.0931003	insig	-2.76248	0.0525293	insig	1.79423	0.239741	insig	4.5624	7.21814e-07	up	-5.7511	9.47497e-05	up	-6.09736	1.18484e-11	up	-2.80925	0.128782	insig	-0.606233	0.66713	insig
0.273074	0.235289	insig	-0.413242	0.613402	insig	-0.610987	0.167115	insig	-0.704852	0.721403	insig	0.23266	0.977682	insig	0.910318	0.0367893	insig	PB.670	-0.589986	0.159456	insig	-1.18692	9.54054e-06	down	-1.12637	7.96343e-05	down	-0.591938	0.100547	insig	-0.0654252	0.874325	insig	0.539325	0.195948	insig	-0.443831	0.0509988	insig	0.424644	0.0459902	insig	0.291393	0.697842	insig	0.0428361	0.943272	insig
0.00933895	0.979544	insig	0.455924	0.345237	insig	0.563855	0.0110692	insig	0.425487	0.726836	insig	-0.080116	0.991271	insig	-0.526112	0.00948492	insig	PB.671	0.272732	0.905801	insig	1.17731	0.00398028	up	-0.136394	0.820813	insig	0.911654	0.0924354	insig	1.30975	0.000107589	up	0.412927	0.510655	insig	-0.393334	0.231709	insig	-0.649287	0.0709937	insig	-1.15511	0.0092134	up	0.277505	0.192733	insig
-0.674995	0.012979	insig	-0.874838	0.0653139	insig	-0.458005	0.172895	insig	-0.219891	0.920859	insig	-0.389724	0.891213	insig	-0.193031	0.711671	insig	PB.672	-0.0374199	0.988993	insig	0.176776	0.719586	insig	-0.0769709	0.88133	insig	0.219408	0.630022	insig	0.248133	0.375878	insig	0.0420081	0.932389	insig	1.03821	7.19379e-05	down	0.405322	0.210399	insig	-0.0535601	0.926682	insig	0.627938	0.0849366	insig
-0.642023	0.0918755	insig	-1.20407	0.030288	down	-0.405581	0.149315	insig	-0.580858	0.768108	insig	-0.765	0.621676	insig	-0.209822	0.696402	insig	PB.673	-0.0288791	0.989668	insig	-0.0664439	0.904446	insig	-1.13494	0.00751026	down	-0.0321173	0.969677	insig	1.06344	0.0171968	up	1.10911	0.0419394	up	-1.72879	1.38044e-13	up	-2.33558	1.011e-09	up	-2.90295	1.43619e-09	up	-1.03179	0.0138789	up
0.220549	0.549236	insig	0.958201	0.263855	insig	0.0581016	0.908926	insig	0.717499	0.787005	insig	0.926135	0.731308	insig	0.189674	0.74417	insig	PB.674	0.769751	0.181854	insig	0.585721	0.170486	insig	0.316743	0.505883	insig	-0.177676	0.813211	insig	0.264012	0.561406	insig	0.455102	0.519714	insig	1.93843	3.74606e-15	down	1.39376	0.000107454	down	2.27035	0.00131041	down	1.64582	2.66216e-05	down
-1.46755	0.000741936	down	-1.5137	0.0982547	insig	-0.216659	0.761952	insig	-0.065711	0.991633	insig	-1.27285	0.67569	insig	-1.23182	0.0794536	insig	PB.675	-0.217161	0.947478	insig	-0.99494	0.0323456	insig	-1.4366	0.00111806	down	-0.771185	0.327345	insig	0.435739	0.292483	insig	1.21861	0.0597453	insig	2.80001	4.25083e-17	down	1.55426	0.00748042	down	2.24347	0.00571394	down	3.99361	3.31505e-11	down
0.969579	0.0041375	insig	1.58581	0.00176971	up	1.01555	0.00720984	up	0.594533	0.599403	insig	0.599091	0.693457	insig	-0.0169659	0.975064	insig	PB.676	-0.675508	0.473207	insig	-0.209387	0.601531	insig	0.561526	0.0764538	insig	0.470417	0.513151	insig	-0.775438	0.00626763	insig	-1.23098	0.0298191	down	-1.00526	0.00115938	up	0.648414	0.138782	insig	0.753158	0.0847315	insig	-0.578639	0.0840624	insig
0.595341	0.194941	insig	0.776494	0.214496	insig	0.248086	0.670559	insig	0.159482	0.937867	insig	0.55764	0.740002	insig	0.378248	0.421375	insig	PB.677	-0.188739	0.893698	insig	-0.319911	0.448488	insig	0.163556	0.687249	insig	-0.126106	0.85006	insig	-0.488107	0.161066	insig	-0.349804	0.475508	insig	-1.65512	2.35521e-06	up	-0.865877	0.0110208	insig	-0.600993	0.170947	insig	-1.60352	8.31233e-07	up
-0.520977	0.014068	insig	-0.353914	0.510153	insig	-0.189773	0.426454	insig	0.146277	0.944577	insig	-0.136639	0.979152	insig	-0.30426	0.224778	insig	PB.678	0.0128801	0.994662	insig	0.1644	0.558472	insig	-0.0114712	0.971648	insig	0.158058	0.710163	insig	0.171028	0.494213	insig	0.0252615	0.965988	insig	1.23986	3.48443e-14	down	0.711645	0.00357427	insig	0.68125	0.119977	insig	1.03146	9.96987e-07	down
0.854102	0.0506501	insig	0.869077	0.397512	insig	-0.171588	0.751156	insig	-0.0074345	0.999254	insig	1.07425	0.698308	insig	1.06032	0.0134917	up	PB.679	-0.256602	0.77219	insig	-0.0530963	0.921408	insig	0.402314	0.104253	insig	0.208117	0.745137	insig	-0.460083	0.18546	insig	-0.655803	0.0438579	insig	-1.2571	6.51121e-05	up	-0.137446	0.776427	insig	-0.373362	0.697842	insig	-1.86091	1.12193e-10	up
-1.10726	0.00123532	down	-0.621391	0.398474	insig	-0.11837	0.825167	insig	0.465446	0.82235	insig	-0.474734	0.87496	insig	-0.962233	0.00172617	insig	PB.682	0.418709	0.711351	insig	-0.611426	0.201091	insig	-0.736293	0.0113126	insig	-1.02166	0.135382	insig	0.120433	0.849719	insig	1.15436	0.0381325	up	2.25969	1.10477e-13	down	0.738573	0.0446793	insig	2.20893	0.000149766	down	2.8473	1.01233e-17	down
0.233822	0.34849	insig	-0.410106	0.74386	insig	-1.00803	0.00728238	down	-0.663328	0.864213	insig	0.632042	0.922639	insig	1.26862	0.000853993	up	PB.683	-0.0165151	0.993734	insig	0.0778008	0.856774	insig	-0.502428	0.207231	insig	0.100877	0.844623	insig	0.575517	0.11627	insig	0.489088	0.332048	insig	-0.955844	4.43468e-06	insig	-0.698982	0.000958524	insig	-1.4837	0.106021	insig	-1.48953	0.00193146	up
0.632393	0.054467	insig	1.2472	0.0428151	up	1.33827	0.000416016	up	0.592566	0.75576	insig	-0.065915	0.993405	insig	-0.676885	0.138889	insig	PB.684	-0.0454791	0.980104	insig	0.394668	0.16947	insig	0.0230797	0.953832	insig	0.444929	0.252554	insig	0.366892	0.170195	insig	-0.065885	0.922645	insig	-1.31762	9.80539e-09	up	-0.632759	0.0659366	insig	-0.508428	0.387045	insig	-0.0337621	0.947302	insig
0.744742	0.493196	insig	0.675873	0.618891	insig	0.787082	0.44324	insig	-0.087873	0.989455	insig	-0.0853159	0.993405	insig	-0.0211362	0.986492	insig	PB.685	0.0968096	0.984384	insig	0.140038	0.908118	insig	0.026513	0.982795	insig	0.0491567	0.979601	insig	0.108971	0.919476	insig	0.0697545	0.970133	insig	-1.85102	0.0102279	up	-1.19584	0.164897	insig	-1.35483	0.0842817	insig	-1.11484	0.12294	insig
-2.24617	0.203156	insig	-0.771978	0.781492	insig	-2.45584	0.11411	insig	1.44691	0.906862	insig	1.72082	0.914004	insig	0.258138	0.952282	insig	PB.686	-0.720714	0.672658	insig	-0.00792091	0.99367	insig	-0.123719	0.881701	insig	0.718292	0.364649	insig	0.111507	0.841037	insig	-0.593647	0.615257	insig	-3.13089	1.15443e-07	up	-4.6434	0.000341597	up	-3.93402	0.00135927	up	-5.48084	6.07571e-09	up
0.199391	0.769365	insig	1.57243	0.0856758	insig	1.83434	3.60718e-05	up	1.35431	0.571552	insig	-0.236232	0.984675	insig	-1.60927	0.00734434	down	PB.687	-0.18992	0.908378	insig	0.520458	0.081128	insig	0.00297787	0.995082	insig	0.713969	0.0189334	insig	0.512193	0.0374244	insig	-0.188746	0.76498	insig	-1.41151	3.51014e-06	up	-1.01915	0.0821151	insig	-0.39978	0.667385	insig	0.383995	0.474945	insig
1.44033	0.000252218	up	2.04001	0.0198911	up	1.6544	0.00132829	up	0.57615	0.871984	insig	0.416773	0.958338	insig	-0.178755	0.838143	insig	PB.689	-0.0602198	0.989342	insig	0.81845	0.06663	insig	-0.141815	0.680048	insig	0.882793	0.388181	insig	0.955546	0.037905	insig	0.0890735	0.952424	insig	-1.71786	2.7758e-10	up	-0.210512	0.784056	insig	-0.542124	0.568607	insig	0.0437498	0.949526	insig
-0.540008	0.104853	insig	-0.329271	0.684596	insig	0.431008	0.153703	insig	0.190228	0.946948	insig	-0.733143	0.717802	insig	-0.94454	0.000856	insig	PB.690	-0.75818	0.194277	insig	0.306143	0.46245	insig	-0.449906	0.292399	insig	1.07096	3.40097e-05	up	0.751831	0.00197123	insig	-0.305533	0.548433	insig	-1.77655	3.9388e-10	up	-1.55125	3.45812e-07	up	-2.45605	6.56688e-07	up	-0.925807	0.000335801	insig
-0.0623202	0.888568	insig	-0.380583	0.54188	insig	-0.361417	0.267469	insig	-0.338063	0.871281	insig	0.00874397	0.998035	insig	0.324271	0.427995	insig	PB.692	-0.776766	0.224541	insig	-1.22421	0.0300026	down	-0.959624	0.00100242	insig	-0.441533	0.703208	insig	-0.269608	0.72782	insig	0.182983	0.829347	insig	-1.58604	2.33415e-11	up	-0.866324	0.0457689	insig	-0.785173	0.276144	insig	-1.01811	0.000199149	up
0.0748435	0.860573	insig	0.0823281	0.94371	insig	-0.615395	0.0771107	insig	-0.0118338	0.998263	insig	0.725717	0.821309	insig	0.715738	0.0225581	insig	PB.693	2.82618	0.000431655	up	-1.68482	0.0112097	down	-0.113969	0.92304	insig	-4.50156	2.58132e-10	down	-1.5758	0.0638156	insig	2.93399	0.00115473	up	2.41877	3.2706e-11	down	-0.329291	0.645745	insig	4.1466	1.79765e-08	down	1.8875	0.000616534	down
0.537365	0.377155	insig	0.669677	0.486685	insig	-0.547132	0.424158	insig	0.110036	0.976551	insig	1.24637	0.511495	insig	1.11528	0.0368981	up	PB.697	0.0686548	0.983751	insig	0.244677	0.735756	insig	1.01015	0.0196068	up	0.181328	0.869824	insig	-0.770116	0.124935	insig	-0.939074	0.210032	insig	-0.209997	0.696953	insig	0.267964	0.672187	insig	0.176725	0.834006	insig	-1.79519	2.89809e-05	up
-0.106191	0.77008	insig	0.134011	0.78463	insig	0.0740009	0.874102	insig	0.220505	0.87644	insig	0.0876166	0.989854	insig	-0.154291	0.754812	insig	PB.698	0.0357273	0.986444	insig	-0.351861	0.19073	insig	-0.271141	0.375266	insig	-0.381011	0.234453	insig	-0.085214	0.719199	insig	0.308106	0.467866	insig	-1.13465	8.64804e-07	up	-1.27096	5.62893e-06	up	-0.690293	0.0143895	insig	-0.82175	0.0139968	insig
-0.519207	0.259301	insig	-1.06415	0.106503	insig	-0.711629	0.0651969	insig	-0.561918	0.806895	insig	-0.320355	0.94289	insig	0.215045	0.718533	insig	PB.699	0.204704	0.738031	insig	0.195632	0.51998	insig	-0.608557	0.00845154	insig	-0.00278589	0.9965	insig	0.799437	0.00210616	insig	0.816287	0.0109921	insig	-0.11416	0.732461	insig	-0.833391	0.0503581	insig	-1.41209	0.00660703	up	-0.248625	0.455559	insig
-0.283836	0.603068	insig	-0.174734	0.88361	insig	0.0751482	0.857803	insig	0.0899809	0.989455	insig	-0.224273	0.9837	insig	-0.336361	0.591179	insig	PB.701	0.347746	0.893414	insig	-0.401706	0.560514	insig	-0.647517	0.275218	insig	-0.740539	0.490423	insig	0.241006	0.769525	insig	0.991119	0.279473	insig	3.29465	3.80995e-30	down	2.66712	3.80011e-06	down	3.48237	1.81941e-05	down	3.98778	4.38413e-22	down
1.38103	0.00178198	up	1.26079	0.141939	insig	0.361242	0.566034	insig	-0.142079	0.971393	insig	0.931101	0.738526	insig	1.05112	0.0328258	up	PB.702	-0.226659	0.909933	insig	0.0022241	0.99825	insig	0.379169	0.386613	insig	0.234817	0.796666	insig	-0.381603	0.439303	insig	-0.603276	0.442928	insig	-1.54639	5.83568e-06	up	0.068831	0.907636	insig	-0.329746	0.690412	insig	-1.59477	0.000517748	up
0.293304	0.317783	insig	0.50371	0.165794	insig	0.416112	0.223059	insig	0.188614	0.865256	insig	0.115578	0.976989	insig	-0.0929673	0.840881	insig	PB.703	-0.0199266	0.99047	insig	0.187349	0.604952	insig	0.508684	0.123342	insig	0.211694	0.672736	insig	-0.326544	0.358013	insig	-0.525071	0.311056	insig	0.85028	0.000187086	insig	1.17055	3.13159e-06	down	1.1276	3.97712e-05	down	0.726097	0.0359264	insig
-0.815869	0.465038	insig	-4.77379	0.0285711	down	-0.382356	0.788889	insig	-3.97755	0.367228	insig	-4.36029	0.348049	insig	-0.407387	0.815663	insig	PB.705	1.16507	0.801738	insig	1.12319	0.654903	insig	-0.386513	0.877851	insig	-0.0359315	0.993717	insig	1.50627	0.538761	insig	1.55063	0.55927	insig	1.41097	0.188596	insig	-0.55945	0.667257	insig	-4.5113	0.109369	insig	1.39978	0.358604	insig
0.228407	0.431243	insig	0.559597	0.283461	insig	0.464936	0.120364	insig	0.309699	0.874942	insig	0.123865	0.98483	insig	-0.205963	0.635186	insig	PB.707	0.036022	0.989546	insig	0.48846	0.201076	insig	0.0573499	0.921058	insig	0.460118	0.107017	insig	0.42703	0.032332	insig	-0.0202526	0.971215	insig	-1.40778	6.10005e-07	up	-1.20892	9.54509e-06	up	-1.38008	0.000573764	up	-1.03256	0.000349258	up
0.303014	0.705279	insig	-0.369214	0.801766	insig	0.648796	0.423663	insig	-0.690178	0.841374	insig	-0.987405	0.777199	insig	-0.320882	0.631176	insig	PB.708	-0.097375	0.971187	insig	-0.387539	0.406938	insig	-1.24102	2.91163e-05	down	-0.280778	0.735983	insig	0.849282	0.0237968	insig	1.14306	0.0183951	up	-3.49215	3.78671e-12	up	-3.08883	1.39832e-14	up	-3.51354	3.03049e-06	up	-1.63516	0.000472593	up
0.0702281	0.917846	insig	0.944738	0.309387	insig	0.863847	0.124534	insig	0.85293	0.680594	insig	0.108961	0.993405	insig	-0.766042	0.0916088	insig	PB.711	-0.0374339	0.988606	insig	0.0567863	0.923767	insig	-0.339707	0.475055	insig	0.099662	0.889877	insig	0.391978	0.331576	insig	0.30411	0.648996	insig	-1.94301	1.08382e-06	up	-1.8302	4.47597e-08	up	-1.1021	0.100671	insig	-0.770165	0.0913202	insig
2.54476	2.11285e-15	up	5.21743	2.67679e-06	up	4.3512	2.33353e-25	up	2.64894	0.253671	insig	0.892989	0.900295	insig	-1.77249	0.0003959	down	PB.713	3.09305	0.728746	insig	5.14523	3.79057e-11	up	5.7643	5.1577e-15	up	2.05423	0.676564	insig	-0.623302	0.426663	insig	-2.6607	0.650484	insig	2.63952	0.000301775	down	2.09708	0.478851	insig	2.65903	0.0264322	down	1.192	0.0295469	down
3.32195	0.0140795	up	6.37335	6.36715e-08	up	8.25913	3.52449e-09	up	3.02097	0.39255	insig	-1.85857	0.702523	insig	-4.88529	0.0195954	down	PB.714	4.75514	0.202879	insig	5.52688	4.77628e-05	up	8.35335	4.52865e-05	up	0.77262	0.758247	insig	-2.82999	2.2281e-05	down	-3.58793	0.00405167	down	2.30758	0.25933	insig	0.882987	0.656796	insig	3.10697	0.00717977	down	2.17743	0.197978	insig
0.428713	0.25037	insig	0.296245	0.598918	insig	0.0661175	0.895604	insig	-0.15342	0.921551	insig	0.258733	0.912039	insig	0.391058	0.232298	insig	PB.715	-0.344781	0.821792	insig	-0.909086	0.0672861	insig	0.609042	0.119502	insig	-0.558649	0.530453	insig	-1.52289	0.000738997	down	-0.950927	0.145428	insig	0.953861	0.00446328	insig	1.7329	5.79656e-07	down	2.11759	2.65193e-07	down	0.38057	0.198196	insig
-0.679174	0.0288454	insig	-0.745299	0.198659	insig	-0.402627	0.159945	insig	-0.0850139	0.976551	insig	-0.312372	0.932074	insig	-0.251415	0.5361	insig	PB.716	0.41943	0.681065	insig	-0.0638496	0.90483	insig	-0.000679691	0.999179	insig	-0.478209	0.141359	insig	-0.0688356	0.818302	insig	0.422365	0.293334	insig	1.15042	4.24961e-05	down	0.0556301	0.894896	insig	0.430699	0.427137	insig	0.716161	0.00512128	insig
-0.844434	0.000313812	insig	-0.801036	0.111971	insig	-0.668061	0.0858974	insig	0.0227751	0.993728	insig	-0.104899	0.99147	insig	-0.150713	0.789403	insig	PB.717	-0.324281	0.567841	insig	-0.218099	0.436076	insig	-0.155141	0.588185	insig	0.111945	0.780785	insig	-0.0680496	0.784994	insig	-0.167248	0.672452	insig	2.06007	7.65235e-24	down	1.54555	1.62123e-13	down	1.4379	0.000527876	down	1.5192	0.000159436	down
-0.644371	0.0607187	insig	-0.604188	0.41897	insig	-0.370489	0.323568	insig	0.0170262	0.996496	insig	-0.207217	0.974346	insig	-0.242433	0.51265	insig	PB.718	0.197529	0.945138	insig	0.416906	0.468682	insig	-1.2687	0.018911	down	0.226314	0.675329	insig	1.6809	2.19548e-08	up	1.46696	0.000282845	up	0.130029	0.776213	insig	-0.704614	0.0233881	insig	-0.932332	0.109573	insig	0.998056	0.000618665	insig
0.804379	0.0335315	insig	0.79701	0.486685	insig	-0.543212	0.0589198	insig	-0.0293472	0.996328	insig	1.37335	0.61292	insig	1.38091	0.000817584	up	PB.719	0.148332	0.91406	insig	0.0557999	0.910208	insig	0.246508	0.494974	insig	-0.0875508	0.896535	insig	-0.195654	0.61854	insig	-0.0960798	0.894748	insig	-0.136533	0.571745	insig	0.526217	0.250947	insig	0.564069	0.58919	insig	-0.955989	0.0011914	insig
0.350314	0.300918	insig	0.858844	0.0110592	insig	1.08987	0.0108179	up	0.487053	0.576822	insig	-0.201868	0.970514	insig	-0.70771	0.161342	insig	PB.722	-0.0362477	0.987464	insig	0.446088	0.204755	insig	-0.305232	0.402893	insig	0.489375	0.315345	insig	0.746831	0.0227451	insig	0.270224	0.676046	insig	-0.216595	0.423622	insig	0.175678	0.666459	insig	0.154541	0.698482	insig	1.14536	0.0166283	down
-0.241317	0.415081	insig	0.109479	0.839661	insig	0.502733	0.0223061	insig	0.330936	0.810482	insig	-0.364239	0.818048	insig	-0.717615	0.00182776	insig	PB.724	0.782077	0.604416	insig	1.06322	0.0140225	up	0.591575	0.235263	insig	0.2839	0.797567	insig	0.467008	0.305366	insig	0.196816	0.878489	insig	1.93774	8.41834e-13	down	0.920844	0.0769745	insig	0.946026	0.0292181	insig	1.8182	6.81728e-15	down
1.50977	0.000257461	up	2.05141	0.0392663	up	0.399931	0.291644	insig	0.518452	0.906414	insig	1.68168	0.441228	insig	1.14352	0.0209191	up	PB.726	0.039323	0.987827	insig	-0.30188	0.598361	insig	1.23459	2.02698e-08	up	-0.338478	0.703208	insig	-1.54147	0.000456815	down	-1.19163	0.00337638	down	-1.36609	2.5332e-09	up	0.111512	0.855176	insig	0.94577	0.357135	insig	-2.23043	2.10188e-13	up
0.571651	0.0511947	insig	1.25081	0.00254065	up	0.477092	0.264704	insig	0.659182	0.50985	insig	0.804687	0.568444	insig	0.124564	0.846088	insig	PB.727	0.253581	0.711351	insig	-0.252195	0.629198	insig	0.546146	0.0243576	insig	-0.501739	0.431682	insig	-0.803267	0.0584395	insig	-0.289188	0.452337	insig	0.224028	0.345785	insig	0.547273	0.0610316	insig	1.6875	0.000303237	down	0.120762	0.806479	insig
-1.38374	0.00013016	down	-1.4937	0.0532786	insig	-1.00231	0.102131	insig	-0.13081	0.972069	insig	-0.46467	0.94289	insig	-0.357362	0.641932	insig	PB.728	0.254815	0.891153	insig	-0.200712	0.605359	insig	-0.483986	0.164109	insig	-0.448973	0.417226	insig	0.277883	0.308534	insig	0.739328	0.169306	insig	2.52844	2.55489e-14	down	0.894026	0.01265	insig	1.1961	0.0700827	insig	1.98205	0.0014407	down
-0.262466	0.370832	insig	-0.514303	0.18477	insig	-0.262957	0.306201	insig	-0.273229	0.83405	insig	-0.221227	0.914689	insig	0.0306487	0.945655	insig	PB.729	-0.156737	0.860209	insig	-0.132092	0.655267	insig	-0.121553	0.66027	insig	0.0297072	0.957025	insig	-0.0154881	0.961123	insig	-0.0324365	0.961039	insig	1.1323	6.6115e-09	down	1.03314	0.000134624	down	0.711552	0.0223594	insig	0.959886	1.49129e-07	insig
0.0414959	0.948592	insig	-0.447632	0.667356	insig	-0.620623	0.247282	insig	-0.509388	0.864213	insig	0.202406	0.984675	insig	0.68708	0.138884	insig	PB.732	-0.166317	0.910569	insig	-0.555786	0.10107	insig	-0.17246	0.66027	insig	-0.384399	0.478363	insig	-0.388242	0.291417	insig	0.00855896	0.993116	insig	-1.15905	0.000693558	up	-0.943943	0.0178015	insig	-1.09226	0.111634	insig	-1.63544	1.39644e-05	up
-0.146199	0.809218	insig	-0.836755	0.283744	insig	-1.34111	0.0100277	down	-0.711981	0.632351	insig	0.535148	0.860889	insig	1.22394	0.00115716	up	PB.733	-0.0913336	0.971535	insig	-0.0163656	0.978428	insig	-1.28204	0.00057648	down	0.0811764	0.889525	insig	1.26164	4.65555e-09	up	1.19503	0.00195358	up	-3.67108	1.18243e-22	up	-3.71605	2.66695e-38	up	-4.52818	6.06482e-30	up	-3.75697	9.96101e-31	up
-0.355125	0.222015	insig	-0.644435	0.312978	insig	-1.07647	1.06404e-05	down	-0.306809	0.902093	insig	0.46424	0.881713	insig	0.745162	0.0178588	insig	PB.735	0.660681	0.379728	insig	0.254114	0.627983	insig	0.436099	0.370202	insig	-0.399945	0.446167	insig	-0.186706	0.644389	insig	0.226717	0.753124	insig	2.2236	1.18497e-18	down	1.21367	0.000138221	down	1.28726	0.0189626	down	0.681068	0.0267466	insig
0.778171	0.0235883	insig	1.1037	0.0828173	insig	0.121945	0.682225	insig	0.302542	0.920247	insig	1.01205	0.50342	insig	0.689988	0.0974455	insig	PB.736	-0.646016	0.595825	insig	-0.255838	0.721562	insig	0.664824	0.206526	insig	0.395093	0.586798	insig	-0.924616	0.021049	insig	-1.30782	0.000127879	down	-0.28217	0.459079	insig	1.1498	0.00436657	down	1.03536	0.107744	insig	-0.854967	8.8791e-05	insig
1.8096	7.34623e-06	up	1.62093	0.000138575	up	1.13854	0.0659825	insig	-0.210933	0.928152	insig	0.514556	0.894939	insig	0.70758	0.355686	insig	PB.737	1.57501	0.426889	insig	-0.0797282	0.96622	insig	-0.558775	0.72754	insig	-1.64384	0.131392	insig	0.475884	0.682458	insig	2.13139	0.0425157	up	1.59485	0.0201668	down	1.83992	0.000531331	down	3.25732	1.05735e-08	down	3.25918	5.03993e-06	down
1.59561	0.000537532	up	2.14178	0.00138541	up	1.74091	0.0525069	insig	0.5234	0.864213	insig	0.431755	0.970514	insig	-0.105476	0.952282	insig	PB.738	3.96792	5.90204e-36	up	0.386553	0.696747	insig	0.11001	0.91327	insig	-3.57605	6.04779e-08	down	0.271926	0.808707	insig	3.85574	2.58361e-12	up	1.29289	0.000256324	down	-1.07499	0.0321509	up	3.0119	9.46162e-05	down	2.88836	0.00785255	down
0.347846	0.151448	insig	0.754553	0.0397776	insig	0.0290662	0.942387	insig	0.386289	0.706084	insig	0.756003	0.362866	insig	0.348436	0.297623	insig	PB.741	0.128221	0.917148	insig	-0.382365	0.351376	insig	0.730382	8.59715e-05	insig	-0.507318	0.367875	insig	-1.11792	0.00149201	down	-0.599187	0.0594328	insig	0.211219	0.287034	insig	0.436123	0.0877318	insig	1.30852	0.00156683	down	-0.522331	0.0680512	insig
0.167287	0.692417	insig	0.988253	0.051722	insig	0.971371	0.0222996	insig	0.800206	0.291571	insig	0.0440099	0.993405	insig	-0.776153	0.0445444	insig	PB.742	0.078241	0.968727	insig	0.458058	0.186895	insig	0.0872463	0.820939	insig	0.383562	0.464991	insig	0.365827	0.286598	insig	-0.00491582	0.994439	insig	-1.70297	1.64146e-09	up	-1.60729	8.79596e-10	up	-1.21324	0.00213547	up	-0.851449	0.0338303	insig
0.351053	0.541619	insig	0.229408	0.854907	insig	0.234575	0.733766	insig	-0.142761	0.973851	insig	0.0226184	0.997332	insig	0.141939	0.783772	insig	PB.743	-0.430219	0.714833	insig	0.0754151	0.899772	insig	-0.881236	0.00914935	insig	0.50974	0.407165	insig	0.952094	0.00414584	insig	0.455785	0.453321	insig	-2.29998	2.27922e-08	up	-1.50922	2.75043e-05	up	-2.18745	0.00157132	up	-1.20924	0.000276466	up
-0.644851	0.0197392	insig	-1.00938	0.00599321	down	-0.618614	0.108213	insig	-0.384356	0.759973	insig	-0.361435	0.900377	insig	-0.00160863	0.9983	insig	PB.746	-0.111586	0.937987	insig	-0.00705657	0.984956	insig	-0.853263	0.00023752	insig	0.110599	0.816887	insig	0.841246	0.000200581	insig	0.743647	0.0655713	insig	-0.244053	0.214038	insig	-0.771103	0.0162141	insig	-1.28501	4.55347e-05	up	-0.0374899	0.943212	insig
0.558705	0.126539	insig	0.230558	0.777805	insig	-0.198455	0.629666	insig	-0.34982	0.895318	insig	0.461462	0.879595	insig	0.788671	0.0242284	insig	PB.747	0.0483884	0.977306	insig	0.193262	0.49584	insig	0.151589	0.613793	insig	0.149001	0.690873	insig	0.0363364	0.870029	insig	-0.0996312	0.83339	insig	-1.83542	1.40956e-12	up	-1.31855	2.97308e-05	up	-1.83749	0.000216072	up	-2.21461	7.592e-22	up
-0.466225	0.0982722	insig	-0.350227	0.554349	insig	0.356748	0.219674	insig	0.095792	0.969718	insig	-0.681355	0.622963	insig	-0.79849	0.00460254	insig	PB.748	0.107592	0.944944	insig	0.051314	0.89043	insig	0.0812871	0.820813	insig	-0.0518282	0.917556	insig	-0.0352493	0.888774	insig	0.0294325	0.964102	insig	1.10471	1.69134e-07	down	0.536797	0.0798664	insig	0.663652	0.143381	insig	1.35018	4.24201e-08	down
1.04646	0.0203087	up	1.2912	0.00132063	up	1.13518	0.0870576	insig	0.224872	0.930942	insig	0.182531	0.985511	insig	-0.0611603	0.963271	insig	PB.749	0.130158	0.926002	insig	-0.114719	0.759959	insig	0.538631	0.0397412	insig	-0.239297	0.523337	insig	-0.658533	0.00222251	insig	-0.405582	0.211897	insig	-2.02134	8.10117e-16	up	-1.10097	0.0196021	up	-0.655046	0.0485362	insig	-1.45883	0.0438203	up
NA	NA	insig	1.57568	0.826089	insig	2.71726	0.649492	insig	1.78328	0.941022	insig	-1.12638	0.986111	insig	-2.92465	0.669329	insig	PB.752	1.99562	0.0125657	up	2.83271	8.53689e-07	up	1.92802	6.28325e-08	up	0.841715	0.513073	insig	0.899625	0.217059	insig	0.0750392	0.959477	insig	-8.41188	5.79617e-10	up	-10.6312	1.84561e-13	up	-9.64878	3.94992e-13	up	-7.67286	5.55586e-16	up
-0.426087	0.0730986	insig	-1.08822	0.0595676	insig	-0.901559	0.0339215	insig	-0.681011	0.666999	insig	-0.155919	0.986111	insig	0.499383	0.354502	insig	PB.755	0.262031	0.841123	insig	0.00904298	0.987356	insig	-0.120767	0.801518	insig	-0.247223	0.620872	insig	0.124501	0.713693	insig	0.384368	0.518709	insig	2.35949	5.37526e-30	down	1.67703	5.01217e-10	down	1.22564	0.0218125	down	1.55236	0.00185714	down
-0.15244	0.763455	insig	-0.113572	0.873959	insig	0.145109	0.787173	insig	0.0197051	0.993728	insig	-0.227104	0.947039	insig	-0.269724	0.522142	insig	PB.756	0.393975	0.562265	insig	0.607101	0.1061	insig	-0.173775	0.666059	insig	0.219602	0.754693	insig	0.775951	0.0463947	insig	0.571037	0.293769	insig	-0.429862	0.217804	insig	-0.972058	0.00285612	insig	-1.1924	0.00313583	up	-0.144697	0.705847	insig
1.17824	0.162026	insig	2.33137	0.161113	insig	1.87495	0.00614726	up	1.12545	0.83405	insig	0.478745	0.974346	insig	-0.667387	0.263605	insig	PB.757	0.492265	0.888566	insig	0.841596	0.109198	insig	1.40686	0.00595645	up	0.350968	0.77533	insig	-0.570284	0.090387	insig	-0.906536	0.365106	insig	-2.59596	3.10113e-05	up	-1.90022	0.0107378	up	-1.15306	0.400774	insig	-2.15224	9.40559e-16	up
-2.2807	0.116234	insig	0.677138	0.708389	insig	-0.262659	0.839008	insig	2.93532	0.440354	insig	0.97056	0.870677	insig	-1.98254	0.182237	insig	PB.761	-1.10116	0.0465629	down	-0.660713	0.302494	insig	-1.78513	2.24648e-05	down	0.443529	0.674275	insig	1.11931	0.0841571	insig	0.686244	0.423318	insig	-3.17515	1.56962e-07	up	-4.35298	4.55306e-05	up	-1.88543	0.0663188	insig	-1.68443	0.0026752	up
-1.22976	1.24787e-05	down	-1.94621	0.00119613	down	-1.04421	0.0224544	down	-0.73691	0.666999	insig	-0.872638	0.706888	insig	-0.159995	0.823514	insig	PB.762	0.583349	0.664531	insig	0.0931529	0.769292	insig	-0.777563	0.000910197	insig	-0.482872	0.525024	insig	0.86548	2.19548e-08	insig	1.35899	0.0252078	up	1.07837	8.00885e-06	down	-0.72784	0.143141	insig	-0.996744	0.0797048	insig	0.786099	0.134889	insig
0.98047	0.0141295	insig	0.906512	0.146767	insig	0.473288	0.477685	insig	-0.0950423	0.974877	insig	0.466088	0.916512	insig	0.540742	0.446045	insig	PB.764	-0.411246	0.85696	insig	-0.270023	0.712256	insig	-1.00154	0.120481	insig	0.149359	0.810778	insig	0.727659	0.0312045	insig	0.590894	0.348689	insig	-1.43579	0.00161664	up	-0.0363023	0.943387	insig	-0.29934	0.590395	insig	0.00586236	0.993498	insig
-0.0919772	0.713072	insig	0.191826	0.77092	insig	-0.0812433	0.74742	insig	0.263053	0.899633	insig	0.299995	0.929865	insig	0.0164742	0.956652	insig	PB.765	-0.28184	0.771111	insig	-0.667514	0.0115572	insig	-0.227325	0.454406	insig	-0.379348	0.352718	insig	-0.444835	0.0582848	insig	-0.0540665	0.924819	insig	0.186251	0.402705	insig	0.381852	0.13704	insig	1.00629	0.0333736	down	0.301787	0.0665505	insig
0.767744	0.0986098	insig	1.64846	0.00553012	up	3.39873	4.65969e-11	up	0.857273	0.57822	insig	-1.72489	0.138694	insig	-2.59651	6.61409e-06	down	PB.766	1.10912	0.359128	insig	1.6825	2.32794e-05	up	1.65264	7.06615e-05	up	0.576169	0.589429	insig	0.025241	0.969331	insig	-0.535168	0.624453	insig	0.112494	0.795215	insig	-0.222907	0.77157	insig	0.037602	0.958469	insig	1.82197	0.00460209	down
-0.0521575	0.906914	insig	0.157211	0.843909	insig	0.112	0.789521	insig	0.190316	0.942777	insig	0.0733331	0.993405	insig	-0.138665	0.774496	insig	PB.767	0.311817	0.91754	insig	0.177251	0.82384	insig	-0.12907	0.885563	insig	-0.12796	0.869824	insig	0.302275	0.47737	insig	0.4433	0.589757	insig	1.0094	0.0156573	down	0.651856	0.107682	insig	0.950554	0.0801621	insig	1.21988	0.00018749	down
0.192694	0.522647	insig	0.499843	0.235112	insig	1.1246	0.000321193	up	0.286388	0.828005	insig	-0.597824	0.646071	insig	-0.904344	0.00543169	insig	PB.768	-0.146351	0.930805	insig	0.0491725	0.920685	insig	-0.393779	0.256601	insig	0.200376	0.700826	insig	0.437745	0.149638	insig	0.251425	0.638874	insig	-0.115073	0.668067	insig	0.229772	0.460412	insig	0.294545	0.467651	insig	1.37096	5.44662e-05	down
0.0778856	0.747581	insig	0.410521	0.274856	insig	0.0418405	0.869778	insig	0.311181	0.768108	insig	0.396702	0.733508	insig	0.0652989	0.824493	insig	PB.769	-0.303349	0.518713	insig	-0.895827	1.81811e-06	insig	0.127463	0.605369	insig	-0.58727	0.0224573	insig	-1.02836	5.80676e-08	down	-0.429434	0.170114	insig	-0.216962	0.18396	insig	0.169807	0.481327	insig	1.049	0.000714328	down	-0.333568	0.0627346	insig
0.195118	0.7672	insig	0.214736	0.833391	insig	-0.0425729	0.964079	insig	-0.00132661	0.999513	insig	0.285779	0.961951	insig	0.262399	0.697889	insig	PB.770	0.434226	0.694427	insig	-0.020299	0.970846	insig	0.10241	0.828588	insig	-0.448629	0.388026	insig	-0.128134	0.691354	insig	0.331828	0.564587	insig	-0.888264	0.0671607	insig	-1.11855	0.000396898	up	-0.687878	0.158083	insig	-1.05588	0.0520002	insig
-0.00474209	0.99288	insig	0.229647	0.726987	insig	0.382485	0.250647	insig	0.212531	0.910686	insig	-0.127811	0.983195	insig	-0.36081	0.170097	insig	PB.771	-0.0847814	0.956298	insig	-0.0172524	0.968277	insig	-0.171437	0.590127	insig	0.0726621	0.879951	insig	0.148934	0.560469	insig	0.089445	0.862451	insig	-1.2757	4.16326e-07	up	-1.18949	7.38377e-07	up	-1.07001	0.00881511	up	-0.751169	0.000313568	insig
-0.179528	0.534523	insig	-0.144514	0.817523	insig	0.082081	0.819287	insig	0.0129685	0.995941	insig	-0.199844	0.955822	insig	-0.233013	0.3459	insig	PB.772	-0.124655	0.878031	insig	0.170376	0.415276	insig	-0.380088	0.0289601	insig	0.301102	0.156411	insig	0.545744	7.32802e-05	insig	0.257577	0.414018	insig	-0.676293	0.00133585	insig	-0.723736	9.0951e-05	insig	-1.031	0.00653966	up	-0.242792	0.269132	insig
-0.104989	0.791608	insig	0.0297058	0.975118	insig	-0.229929	0.536847	insig	0.114554	0.968556	insig	0.286885	0.952616	insig	0.151668	0.567909	insig	PB.773	0.0453898	0.98048	insig	0.436766	0.113526	insig	0.403656	0.232456	insig	0.397287	0.244083	insig	0.0284146	0.934981	insig	-0.357	0.509233	insig	1.33311	2.06649e-06	down	1.1874	9.26835e-07	down	0.886589	0.110887	insig	0.668278	0.00474373	insig
0.163551	0.667046	insig	0.842062	0.0718788	insig	0.349015	0.373355	insig	0.6562	0.501364	insig	0.523039	0.740002	insig	-0.152384	0.761154	insig	PB.774	-0.163464	0.939676	insig	-0.134381	0.763645	insig	-0.387575	0.31965	insig	0.0371683	0.954914	insig	0.249033	0.188886	insig	0.224108	0.665602	insig	-2.9378	1.28626e-25	up	-2.60466	5.14779e-18	up	-2.00453	8.088e-10	up	-2.23434	4.38699e-14	up
0.0989719	0.873878	insig	-0.226922	0.802834	insig	0.281005	0.728801	insig	-0.346463	0.881612	insig	-0.481384	0.926453	insig	-0.160033	0.870929	insig	PB.775	0.270109	0.917148	insig	0.123668	0.837085	insig	0.0541056	0.9372	insig	-0.140618	0.860099	insig	0.0641105	0.856021	insig	0.215824	0.807987	insig	-1.16716	0.00567548	up	-1.33106	0.0035602	up	-1.55477	0.000536069	up	-0.963451	0.145778	insig
-0.900086	0.105535	insig	2.57645	0.022626	up	-1.29764	0.0625632	insig	3.45098	0.0313274	up	3.89192	0.0059363	up	0.423636	0.693565	insig	PB.776	-0.626346	0.960804	insig	0.100007	0.724483	insig	-1.03023	0.734878	insig	0.737184	0.856167	insig	1.12549	0.671756	insig	0.402419	0.956466	insig	-3.73606	6.15048e-53	up	-4.0024	0.048381	up	-1.30219	0.217486	insig	-4.03057	0.0103858	up
-0.609956	0.018676	insig	-0.553333	0.344331	insig	-0.286486	0.261639	insig	0.0364464	0.991414	insig	-0.24037	0.955822	insig	-0.298095	0.259771	insig	PB.777	0.118931	0.910766	insig	0.0794199	0.856674	insig	-0.317021	0.170046	insig	-0.0331827	0.961109	insig	0.391651	0.227241	insig	0.438206	0.280798	insig	1.29977	1.14098e-11	down	0.576897	0.0332424	insig	0.627519	0.237994	insig	1.30037	2.27883e-13	down
0.27469	0.412027	insig	0.106642	0.919257	insig	-0.0470415	0.929763	insig	-0.189905	0.954899	insig	0.184466	0.984675	insig	0.351443	0.38134	insig	PB.778	0.48522	0.604665	insig	0.433945	0.152749	insig	0.79966	0.00137604	insig	-0.0480441	0.954564	insig	-0.370847	0.160029	insig	-0.30965	0.641049	insig	-0.632738	0.0165323	insig	-0.836098	0.0216796	insig	-1.00244	0.132257	insig	-1.51047	1.80609e-06	up
-0.646623	0.258893	insig	0.34136	0.641833	insig	-0.562384	0.222238	insig	0.966968	0.543074	insig	0.931102	0.253356	insig	-0.0560821	0.952395	insig	PB.779	1.02025	0.414461	insig	1.21872	0.063221	insig	0.343226	0.861796	insig	0.205722	0.806588	insig	0.871661	0.533472	insig	0.672532	0.782787	insig	-0.0625377	0.918765	insig	-1.72013	0.000727974	up	-0.975579	0.0679182	insig	-0.988984	0.251446	insig
-0.173434	0.511745	insig	0.00208179	0.996005	insig	-0.245934	0.329825	insig	0.155519	0.881214	insig	0.278051	0.815608	insig	0.0997236	0.716062	insig	PB.780	0.168056	0.899263	insig	-0.0620295	0.895004	insig	0.296827	0.412969	insig	-0.225026	0.658212	insig	-0.363773	0.280045	insig	-0.12718	0.856903	insig	1.22911	3.49216e-09	down	0.893645	0.000211342	insig	1.25393	5.91061e-06	down	0.656656	0.00682627	insig
-0.459986	0.0456471	insig	-0.170482	0.797726	insig	-0.197149	0.402517	insig	0.269169	0.899633	insig	0.0535904	0.993405	insig	-0.236261	0.328477	insig	PB.782	0.0809761	0.9626	insig	0.106046	0.766995	insig	-0.126659	0.732036	insig	0.030041	0.953916	insig	0.227494	0.332812	insig	0.210498	0.685454	insig	1.12656	2.39506e-08	down	0.590634	0.0190671	insig	0.810599	0.0831417	insig	1.0247	1.91092e-08	down
2.06968	0.0038368	up	4.53392	0.000321737	up	4.72255	1.57476e-08	up	2.4413	0.39255	insig	-0.160475	0.993405	insig	-2.61516	0.00798029	down	PB.784	-0.0931926	0.992786	insig	0.648166	0.561953	insig	2.49852	0.00518692	up	0.74458	0.698356	insig	-1.85286	2.68035e-08	down	-2.58119	0.0455665	down	-1.038	0.232554	insig	1.13117	0.350784	insig	2.80016	0.0155889	down	1.14844	0.284887	insig
-0.0912004	0.972623	insig	2.16413	0.248547	insig	2.78574	0.112121	insig	2.2344	0.48846	insig	-0.595634	0.955822	insig	-2.84996	0.000173169	down	PB.788	-0.157592	0.964878	insig	1.86053	0.0111319	up	-0.342727	0.694617	insig	2.02581	0.0277282	up	2.19825	0.00609374	up	0.184805	0.893262	insig	0.717661	NA	insig	0.784113	0.401596	insig	0.963727	0.498313	insig	3.8087	1.76877e-10	down
-0.305173	0.326349	insig	-0.78828	0.0512316	insig	-0.755024	0.0580846	insig	-0.50372	0.65871	insig	-0.00239259	0.999328	insig	0.476921	0.346279	insig	PB.790	0.0761518	0.968332	insig	0.750676	0.00239586	insig	0.508116	0.152379	insig	0.68038	0.0372896	insig	0.237968	0.49749	insig	-0.428126	0.452587	insig	1.11691	2.52998e-07	down	0.742953	0.0216055	insig	-0.460989	0.225915	insig	-0.17422	0.747643	insig
-0.193691	0.523668	insig	-0.653281	0.114682	insig	-0.520964	0.105474	insig	-0.479274	0.608321	insig	-0.101095	0.985511	insig	0.353514	0.308924	insig	PB.791	0.131956	0.938547	insig	-0.0224021	0.963544	insig	-0.309709	0.419575	insig	-0.149228	0.751069	insig	0.28197	0.330068	insig	0.443184	0.392928	insig	1.47618	4.21723e-10	down	1.15679	6.11784e-06	down	0.806843	0.0168063	insig	1.23654	8.74817e-05	down
0.520075	0.0678739	insig	0.44498	0.318628	insig	1.41553	2.49509e-08	up	-0.0970586	0.96095	insig	-0.941811	0.189119	insig	-0.864824	0.00686637	insig	PB.792	-0.623978	0.460514	insig	-0.186965	0.514654	insig	0.242033	0.368473	insig	0.440977	0.483819	insig	-0.433671	0.0348987	insig	-0.860591	0.136513	insig	-0.88943	6.02364e-06	insig	0.261728	0.590442	insig	-0.298354	0.440844	insig	0.252974	0.413675	insig
0.439287	0.0979788	insig	0.86233	0.0577731	insig	0.385266	0.294849	insig	0.402668	0.759281	insig	0.507836	0.779752	insig	0.0838497	0.871772	insig	PB.793	0.00739433	0.998514	insig	-0.446013	0.321513	insig	0.562118	0.00843545	insig	-0.450344	0.528324	insig	-1.01312	0.0101524	down	-0.55046	0.2012	insig	-0.597558	0.00762849	insig	-0.160011	0.653366	insig	0.67104	0.197805	insig	-0.807197	0.0129053	insig
1.4091	0.102574	insig	1.94025	0.0948222	insig	0.733257	0.319607	insig	0.505383	0.925956	insig	1.23982	0.721905	insig	0.717614	0.514469	insig	PB.794	-0.469007	0.841385	insig	0.289792	0.721695	insig	0.650427	0.338987	insig	0.764335	0.295484	insig	-0.364513	0.477975	insig	-1.11689	0.10772	insig	-1.62839	0.00431428	up	0.254966	0.815675	insig	-0.0240541	0.981917	insig	-1.57648	0.000956761	up
1.07869	0.00798508	up	-0.0723486	0.915464	insig	0.232239	0.603239	insig	-1.17082	0.084451	insig	-0.272449	0.904395	insig	0.8764	0.0229551	insig	PB.795	-0.42584	0.885629	insig	-0.835884	0.268223	insig	-1.10015	0.143666	insig	-0.407475	0.626761	insig	0.258588	0.692637	insig	0.679179	0.211897	insig	-1.89105	0.000146701	up	-0.383521	0.371664	insig	-1.16674	0.022361	up	-0.593301	0.106377	insig
0.42253	0.259544	insig	-0.358606	0.608124	insig	0.303352	0.458768	insig	-0.79967	0.603652	insig	-0.634148	0.779752	insig	0.141663	0.824157	insig	PB.796	0.0913323	0.981139	insig	-0.606585	0.312583	insig	-1.81127	0.0020685	down	-0.692902	0.120073	insig	1.19916	0.000198845	up	1.90463	1.91994e-05	up	-1.27152	0.00239377	up	-0.935623	0.0236101	insig	-1.06055	0.039496	up	0.814446	0.058539	insig
1.56457	0.065316	insig	4.184	0.00243918	up	1.35356	0.0864628	insig	2.59065	0.386583	insig	2.85568	0.231851	insig	0.24757	0.83468	insig	PB.797	0.611725	0.841175	insig	0.870745	0.406617	insig	1.94565	0.0160876	up	0.261705	0.864635	insig	-1.08159	0.170309	insig	-1.33148	0.0736571	insig	-1.93708	0.00942623	up	-0.979219	0.216519	insig	1.325	0.349664	insig	-2.5585	4.92977e-06	up
-0.12012	0.69076	insig	-0.0467385	0.946261	insig	0.0348461	0.920972	insig	0.0530222	0.983947	insig	-0.0539133	0.993405	insig	-0.128059	0.613941	insig	PB.798	0.122984	0.960804	insig	0.11541	0.819273	insig	-0.200077	0.7002	insig	-0.00381136	0.99551	insig	0.310184	0.189239	insig	0.326821	0.572196	insig	0.873231	0.00252128	insig	0.635185	0.021477	insig	0.672521	0.114494	insig	1.07769	4.12867e-08	down
1.77421	0.132131	insig	2.19257	0.22964	insig	4.03499	0.000196785	up	0.393574	0.931796	insig	-1.81576	0.520324	insig	-2.2295	0.0054189	down	PB.799	0.525419	0.767472	insig	1.46609	0.015112	up	1.48125	7.05756e-07	up	0.946154	0.409706	insig	-0.0196199	0.983252	insig	-0.950189	0.210683	insig	-5.76186	3.258e-23	up	-4.51498	3.44801e-18	up	-5.0915	1.25233e-09	up	-3.24949	2.29065e-05	up
0.310436	0.252478	insig	0.612854	0.135283	insig	0.243176	0.365648	insig	0.281816	0.848721	insig	0.39645	0.801644	insig	0.0932025	0.824157	insig	PB.800	0.283497	0.638087	insig	-0.177388	0.527567	insig	0.464136	0.034624	insig	-0.455471	0.110748	insig	-0.646598	0.00114042	insig	-0.178731	0.706456	insig	0.307046	0.104042	insig	0.339263	0.258639	insig	1.05629	0.00174848	down	0.0568714	0.842124	insig
0.0651972	0.927142	insig	0.463755	0.590347	insig	0.599764	0.249679	insig	0.376462	0.898578	insig	-0.105804	0.992998	insig	-0.503827	0.404266	insig	PB.801	-0.198568	0.95191	insig	-0.000471336	0.99973	insig	0.0958931	0.912053	insig	0.204871	0.777962	insig	-0.100453	0.828928	insig	-0.292821	0.764833	insig	-1.19408	0.0117092	up	-0.922435	0.0959769	insig	-0.772972	0.17147	insig	-0.720956	0.0973752	insig
0.222896	0.426785	insig	0.259545	0.686068	insig	0.270971	0.372119	insig	0.0149316	0.995941	insig	0.0154555	0.997128	insig	-0.0193447	0.965604	insig	PB.802	-0.0217198	0.993734	insig	-0.833446	0.00828891	insig	-0.0937559	0.847251	insig	-0.805951	0.0107298	insig	-0.744401	0.00630898	insig	0.0741843	0.917378	insig	0.0318246	0.91702	insig	0.283309	0.317633	insig	1.08654	0.0169967	down	0.365644	0.185252	insig
0.0456708	0.936591	insig	0.244713	0.778398	insig	-0.0418732	0.940254	insig	0.178196	0.951537	insig	0.318656	0.947039	insig	0.117651	0.83172	insig	PB.805	0.247354	0.806974	insig	1.03015	1.40422e-05	up	-0.14001	0.672684	insig	0.788528	0.0253754	insig	1.16537	2.92827e-06	up	0.391183	0.432102	insig	-2.27643	1.34999e-16	up	-2.47258	1.82741e-14	up	-3.10432	1.83147e-11	up	-2.21014	7.60019e-19	up
1.41506	0.0135716	up	2.29012	0.039261	up	0.317892	0.704498	insig	0.849805	0.83405	insig	2.00282	0.38965	insig	1.13369	0.120264	insig	PB.806	-0.316117	0.857033	insig	0.0712637	0.904179	insig	-0.175245	0.756993	insig	0.391691	0.549817	insig	0.241817	0.552489	insig	-0.13665	0.895437	insig	-1.67564	4.16931e-05	up	0.0632002	0.933407	insig	0.498951	0.657062	insig	-1.21631	0.0514332	insig
1.64428	0.00196299	up	2.63067	0.00301441	up	2.03693	1.20242e-05	up	0.962385	0.729505	insig	0.621255	0.904264	insig	-0.359501	0.624983	insig	PB.807	-0.155173	0.945342	insig	0.36493	0.409853	insig	1.29766	7.49863e-06	up	0.524437	0.381478	insig	-0.93728	0.00228222	insig	-1.44909	0.000533626	down	-1.98075	7.24843e-08	up	-0.172994	0.794031	insig	0.240318	0.804524	insig	-1.27197	0.00187492	up
0.0884427	0.763728	insig	0.362388	0.546715	insig	-0.0268418	0.942263	insig	0.25269	0.899772	insig	0.416629	0.860957	insig	0.143472	0.640038	insig	PB.810	-0.27409	0.772498	insig	-0.186717	0.587674	insig	-0.125878	0.749435	insig	0.0925494	0.868008	insig	-0.0659965	0.850856	insig	-0.145834	0.835187	insig	0.674915	0.00178739	insig	1.04312	2.02965e-05	down	1.18507	0.00790425	down	0.741837	0.00475856	insig
0.887003	0.541483	insig	1.35211	0.364421	insig	2.29126	0.000537041	up	0.44414	0.943488	insig	-0.908821	0.873859	insig	-1.37442	0.0919411	insig	PB.812	-0.401008	0.973827	insig	-1.88791	0.336697	insig	0.788666	0.670255	insig	-1.48042	0.652685	insig	-2.67894	0.0801948	insig	-1.17876	0.686096	insig	-2.54012	0.0337737	up	-1.2373	0.512614	insig	0.663113	0.674884	insig	-1.05838	0.00234899	up
0.494316	0.16402	insig	0.449116	0.669394	insig	-0.406825	0.15173	insig	-0.0673512	0.990494	insig	0.888378	0.774599	insig	0.933105	0.0169888	insig	PB.813	-0.160949	0.900379	insig	0.116443	0.759888	insig	0.365775	0.0966659	insig	0.281216	0.554803	insig	-0.254528	0.362251	insig	-0.523036	0.143163	insig	-1.16758	1.0525e-09	up	-0.50559	0.213524	insig	-0.875308	0.289837	insig	-1.96892	8.94293e-17	up
0.825335	0.00593165	insig	1.33097	0.00828736	up	0.997052	0.000716119	insig	0.484088	0.716928	insig	0.361069	0.873859	insig	-0.144626	0.606482	insig	PB.817	-0.0272236	0.989668	insig	-0.0848588	0.795814	insig	0.605751	0.00397618	insig	-0.053458	0.933676	insig	-0.695832	7.0166e-05	insig	-0.628733	0.130425	insig	-1.4512	8.23006e-09	up	-0.591797	0.0492137	insig	-0.0775672	0.882806	insig	-1.08828	1.47235e-10	up
-0.353836	0.326882	insig	-0.964304	0.0111592	insig	-1.05567	0.00061444	down	-0.629105	0.499799	insig	0.118936	0.980857	insig	0.724252	0.0524312	insig	PB.819	0.40494	0.69312	insig	0.704603	0.0699399	insig	0.0256771	0.966957	insig	0.306365	0.613344	insig	0.674392	0.0879191	insig	0.380637	0.612708	insig	2.03157	1.32206e-14	down	1.27983	0.000374299	down	0.323652	0.43601	insig	0.922637	0.00950345	insig
0.189364	0.577225	insig	-0.0415575	0.93997	insig	0.228864	0.512992	insig	-0.251586	0.815392	insig	-0.239922	0.910494	insig	-0.00953131	0.982895	insig	PB.820	-0.254082	0.938547	insig	0.141944	0.853934	insig	0.16189	0.84324	insig	0.401256	0.411412	insig	-0.0255408	0.922543	insig	-0.415625	0.455258	insig	-1.39062	0.00103782	up	-0.943265	0.00647253	insig	-1.61369	3.2409e-11	up	-1.35615	3.15927e-09	up
-1.44788	0.000284694	down	-0.113241	0.916994	insig	0.232516	0.649338	insig	1.31334	0.344058	insig	-0.320343	0.955822	insig	-1.65187	1.90801e-10	down	PB.821	-0.178452	0.956358	insig	-0.163169	0.794917	insig	-0.145245	0.836295	insig	0.021602	0.985648	insig	-0.0234368	0.96058	insig	-0.032707	0.979244	insig	1.3183	0.00127563	down	0.0521175	0.930943	insig	1.3275	0.0410691	down	1.66175	1.92699e-08	down
0.859731	0.00529716	insig	1.52061	0.021413	up	0.993151	0.000412713	insig	0.638926	0.738587	insig	0.551307	0.846628	insig	-0.106777	0.764026	insig	PB.823	-0.0623156	0.977306	insig	0.55968	0.0936829	insig	0.599963	0.0823182	insig	0.626977	0.117568	insig	-0.0448713	0.910247	insig	-0.660005	0.189031	insig	-1.0099	0.000355371	up	-0.0811202	0.833448	insig	-0.0888724	0.906295	insig	-0.645832	0.0101024	insig
1.8212	0.000708493	up	2.61916	0.00274128	up	1.21966	0.0149621	up	0.772188	0.828659	insig	1.42717	0.552126	insig	0.638376	0.419932	insig	PB.827	-0.796604	0.00615406	insig	-0.523267	0.135357	insig	0.239924	0.343144	insig	0.278025	0.663205	insig	-0.768059	0.0250155	insig	-1.03462	0.00427142	down	-2.80087	1.27853e-28	up	-0.17846	0.802814	insig	0.295071	0.764726	insig	-1.85442	3.5379e-05	up
-0.548104	0.017534	insig	-0.473102	0.12289	insig	-0.429213	0.149141	insig	0.0544065	0.965207	insig	-0.013743	0.99657	insig	-0.089876	0.830309	insig	PB.828	-0.132885	0.939676	insig	-0.00697328	0.989902	insig	-0.240084	0.678917	insig	0.132902	0.795098	insig	0.228667	0.625335	insig	0.107058	0.915998	insig	1.1808	9.41672e-08	down	0.772558	0.00408796	insig	0.674346	0.00648937	insig	0.961505	0.019773	insig
-1.50381	0.0157626	down	-1.86846	0.0230618	down	-1.05902	0.200556	insig	-0.38527	0.869086	insig	-0.776656	0.809086	insig	-0.417957	0.654911	insig	PB.830	0.0291092	0.99047	insig	0.685257	0.247936	insig	-0.700983	0.0562035	insig	0.664906	0.458255	insig	1.38193	0.0143274	up	0.731322	0.215326	insig	0.531119	0.352431	insig	-0.992731	0.0339039	insig	-2.06286	0.000481105	up	0.148629	0.859509	insig
0.735432	0.0542755	insig	1.30441	0.0183917	up	0.748149	0.100123	insig	0.546129	0.767088	insig	0.58529	0.821309	insig	0.0208584	0.979538	insig	PB.831	-0.163413	0.939977	insig	0.463646	0.242172	insig	0.116091	0.836133	insig	0.633695	0.0354158	insig	0.343253	0.155228	insig	-0.277367	0.595845	insig	-1.37136	1.46124e-05	up	-0.465396	0.269066	insig	-0.574112	0.2509	insig	-0.772133	0.0913202	insig
-1.01029	0.186343	insig	0.209258	0.890605	insig	0.194875	0.755236	insig	1.20265	0.758965	insig	0.0383708	0.99657	insig	-1.18709	0.149713	insig	PB.834	-0.726332	0.843875	insig	0.888933	0.411171	insig	0.250878	0.857338	insig	1.61792	0.19381	insig	0.632243	0.542448	insig	-0.975424	0.596133	insig	2.24702	5.0373e-05	down	1.96624	0.0537371	insig	1.52738	0.17138	insig	2.16052	6.65421e-05	down
0.100031	0.845541	insig	0.25318	0.85495	insig	0.228893	0.667025	insig	0.130897	0.981496	insig	0.0509524	0.994259	insig	-0.103538	0.866031	insig	PB.840	0.896182	0.683587	insig	1.0098	0.0427184	up	1.50084	0.00330291	up	0.116248	0.942504	insig	-0.495395	0.169407	insig	-0.597601	0.625557	insig	0.753609	0.0911994	insig	-0.0326564	0.970492	insig	-0.0477685	0.967584	insig	-0.543547	0.180065	insig
0.266157	0.330058	insig	0.498783	0.233265	insig	0.575327	0.0345345	insig	0.211675	0.880933	insig	-0.0484176	0.993405	insig	-0.281049	0.319184	insig	PB.841	-0.0221253	0.991274	insig	0.213047	0.541314	insig	-0.109335	0.793372	insig	0.24207	0.342418	insig	0.318029	0.0409331	insig	0.0887135	0.830495	insig	-1.40786	1.00504e-08	up	-1.11222	8.99852e-08	up	-1.16368	5.50016e-05	up	-0.753632	0.000562256	insig
-0.0649829	0.845384	insig	0.542424	0.629872	insig	0.351761	0.186868	insig	0.586791	0.876784	insig	0.216778	0.985463	insig	-0.389361	0.195328	insig	PB.843	0.410706	0.294235	insig	-0.183227	0.639658	insig	-0.485322	0.031602	insig	-0.588631	0.151096	insig	0.297149	0.395766	insig	0.898072	0.00691096	insig	0.622878	0.000740242	insig	0.152806	0.642108	insig	1.31211	0.138807	insig	1.42745	2.34201e-09	down
-0.101249	0.837522	insig	0.598503	0.544536	insig	0.181284	0.674905	insig	0.679326	0.815251	insig	0.440808	0.94289	insig	-0.258112	0.574673	insig	PB.844	0.353625	0.931976	insig	0.165249	0.847863	insig	0.699877	0.275993	insig	-0.185514	0.910836	insig	-0.539391	0.398218	insig	-0.341173	0.837492	insig	2.30175	2.06273e-11	down	1.85249	0.00216037	down	2.69714	0.00026973	down	1.75293	9.87968e-07	down
0.126587	0.73642	insig	-0.677182	0.543001	insig	-1.06409	0.158045	insig	-0.82174	0.790653	insig	0.422381	0.972272	insig	1.2142	0.135558	insig	PB.846	-0.364021	0.788623	insig	0.262582	0.540682	insig	0.0500366	0.930954	insig	0.632683	0.103913	insig	0.208398	0.479524	insig	-0.409949	0.47393	insig	-1.26525	1.14595e-05	up	-0.766877	0.0275794	insig	-2.23924	0.00473716	up	-2.40262	0.00273012	up
0.588389	0.293035	insig	0.650238	0.409853	insig	0.735321	0.182114	insig	0.0409366	0.99015	insig	-0.0562803	0.993405	insig	-0.120504	0.806075	insig	PB.848	-0.0274292	0.99047	insig	-0.224837	0.58843	insig	-0.046153	0.927418	insig	-0.193261	0.699044	insig	-0.184049	0.553942	insig	0.0217425	0.978153	insig	-2.08023	2.90698e-07	up	-1.45732	9.63875e-06	up	-1.24379	0.00105296	up	-1.32696	1.47311e-07	up
2.13716	0.000338759	up	2.95921	0.000317428	up	1.7931	0.00457808	up	0.799301	0.759315	insig	1.19494	0.61509	insig	0.376942	0.655467	insig	PB.849	0.340816	0.890697	insig	0.748654	0.154359	insig	1.0164	0.0740635	insig	0.409811	0.667238	insig	-0.2733	0.676561	insig	-0.672352	0.491329	insig	-2.3226	5.86295e-07	up	-0.519763	0.445155	insig	-0.153102	0.867548	insig	-1.57594	0.00824878	up
0.105958	0.646057	insig	0.774124	0.067012	insig	0.720725	0.00593365	insig	0.647258	0.472321	insig	0.0813243	0.992119	insig	-0.585881	0.0294292	insig	PB.850	0.0117907	0.996733	insig	-0.0763633	0.855337	insig	0.245176	0.486435	insig	-0.0809438	0.854483	insig	-0.325966	0.119851	insig	-0.232593	0.571147	insig	0.359572	0.109897	insig	0.460343	0.0352546	insig	1.16985	0.00152885	down	0.803593	0.0044521	insig
3.55715	0.216706	insig	2.41927	0.632976	insig	3.22802	0.298416	insig	-1.16821	0.923919	insig	-0.774806	0.982393	insig	0.377179	0.923862	insig	PB.851	0.439371	0.912157	insig	2.62964	0.00149703	up	1.7955	0.00119895	up	2.19535	0.257009	insig	0.829263	0.577486	insig	-1.34786	0.118582	insig	-7.36475	1.78845e-09	up	-4.26055	0.00115178	up	-7.63778	1.30308e-10	up	-5.98025	6.30243e-12	up
0.339511	0.291861	insig	0.0256364	0.979178	insig	0.982367	0.0435548	insig	-0.334835	0.899772	insig	-0.925413	0.694748	insig	-0.611894	0.284051	insig	PB.855	-0.515213	0.446428	insig	-4.92843e-05	0.999983	insig	-0.562007	0.159554	insig	0.521605	0.0193882	insig	0.557726	0.0306415	insig	0.049468	0.941468	insig	-0.0551786	0.869542	insig	0.808301	0.00243799	insig	-0.0679866	0.925817	insig	1.45674	0.00650332	down
0.0108874	0.982047	insig	-0.606809	0.473931	insig	-0.981382	0.0671987	insig	-0.63859	0.779766	insig	0.406009	0.952176	insig	1.01887	0.0593103	insig	PB.856	-0.195153	0.926964	insig	0.567538	0.280195	insig	0.589318	0.000978649	insig	0.764769	0.362346	insig	-0.0269956	0.969182	insig	-0.778793	0.165117	insig	0.341144	0.231234	insig	0.554358	0.176401	insig	-0.872487	0.260803	insig	-1.25491	0.0270708	up
-0.802022	0.024351	insig	-0.577599	0.486992	insig	-0.672193	0.0369384	insig	0.204383	0.95211	insig	0.123448	0.992422	insig	-0.102365	0.864643	insig	PB.857	0.819022	0.544367	insig	0.407558	0.529397	insig	-0.935997	0.142413	insig	-0.405908	0.54329	insig	1.33726	3.21074e-05	up	1.75551	0.000373469	up	1.81834	3.09805e-06	down	0.200152	0.705831	insig	0.793913	0.259425	insig	2.04717	2.46067e-12	down
-0.227631	0.675163	insig	0.0286464	0.977055	insig	0.0176121	0.983959	insig	0.235736	0.900941	insig	0.0412987	0.993685	insig	-0.218854	0.773956	insig	PB.859	0.543169	0.938228	insig	0.170717	0.921071	insig	-0.174423	0.933144	insig	-0.365308	0.623859	insig	0.339065	0.548449	insig	0.713285	0.423318	insig	-1.47246	0.130498	insig	-2.24213	1.53825e-08	up	-1.65665	5.05062e-05	up	-1.30955	0.0594897	insig
1.16812	0.045689	up	2.23874	0.00830255	up	1.31136	0.0115268	up	1.04602	0.674101	insig	0.956935	0.722402	insig	-0.106464	0.914259	insig	PB.861	-0.447155	0.79867	insig	0.59102	0.19716	insig	0.732947	0.144444	insig	1.04386	0.00135004	up	-0.14585	0.480933	insig	-1.17658	0.00251281	down	-2.99334	3.36614e-12	up	-1.36861	0.0129483	up	-1.38844	0.047245	up	-2.44504	4.4718e-11	up
0.177455	0.591063	insig	-0.174215	0.814061	insig	-0.270934	0.439745	insig	-0.371264	0.848721	insig	0.130839	0.985511	insig	0.478349	0.110037	insig	PB.863	-0.134476	0.973827	insig	-0.362524	0.558591	insig	0.697625	0.117821	insig	-0.225696	0.862263	insig	-1.06505	0.0119424	down	-0.825815	0.363191	insig	0.951421	0.002833	insig	1.26791	0.0136006	down	1.10053	0.0509876	insig	-0.0499313	0.879469	insig
-0.000328339	0.99956	insig	0.467737	0.188035	insig	1.22819	0.00222549	up	0.447462	0.367624	insig	-0.731164	0.597278	insig	-1.19849	0.0027762	down	PB.865	0.143266	0.92827	insig	0.242563	0.431139	insig	-0.150454	0.614839	insig	0.106355	0.864342	insig	0.388255	0.149164	insig	0.294829	0.581004	insig	0.412583	0.0644755	insig	0.2743	0.365047	insig	0.59615	0.0426993	insig	1.75638	6.91877e-05	down
-0.594583	0.054467	insig	-1.00902	0.0189866	down	-0.287659	0.402517	insig	-0.435747	0.679207	insig	-0.694221	0.467725	insig	-0.279486	0.408086	insig	PB.866	0.310759	0.805708	insig	0.466575	0.252611	insig	0.637612	0.0737802	insig	0.161641	0.824555	insig	-0.175857	0.678419	insig	-0.324532	0.656922	insig	1.20991	7.84442e-06	down	0.311764	0.411848	insig	-0.307093	0.492706	insig	0.255516	0.391528	insig
0.242559	0.531385	insig	1.04735	0.117544	insig	0.9252	0.00911866	insig	0.783698	0.613086	insig	0.150297	0.984675	insig	-0.653794	0.0289017	insig	PB.867	0.257355	0.866236	insig	1.16829	3.81677e-05	up	0.823339	0.0232992	insig	0.917956	0.000192768	insig	0.340563	0.129142	insig	-0.564893	0.201672	insig	0.17336	0.642591	insig	0.165499	0.630049	insig	0.00819763	0.989533	insig	0.243908	0.451539	insig
0.0198163	0.954964	insig	-0.358879	0.318628	insig	-0.176809	0.562072	insig	-0.398934	0.673366	insig	-0.151367	0.967826	insig	0.225892	0.544473	insig	PB.870	0.0488111	0.983048	insig	0.125236	0.734315	insig	-0.0890721	0.836295	insig	0.0810378	0.91002	insig	0.209599	0.522088	insig	0.142138	0.864562	insig	1.07579	3.29605e-08	down	1.05285	0.00143914	down	0.551888	0.0714787	insig	0.955609	0.00108176	insig
0.44218	0.175426	insig	0.928352	0.0110592	insig	1.02699	0.000141869	up	0.464281	0.729505	insig	-0.06997	0.992802	insig	-0.553624	0.176286	insig	PB.872	-0.0847585	0.945342	insig	0.0864336	0.773773	insig	0.325381	0.153079	insig	0.176527	0.637531	insig	-0.244004	0.276221	insig	-0.407696	0.282338	insig	-0.47566	0.0081071	insig	0.0570824	0.895505	insig	0.324331	0.367237	insig	0.194386	0.557928	insig
1.26212	0.0130082	up	3.3476	0.0143816	up	2.16968	5.72439e-07	up	2.06121	0.560244	insig	1.20735	0.846889	insig	-0.87021	0.200113	insig	PB.873	0.249041	0.935187	insig	0.516928	0.376724	insig	0.860784	0.100368	insig	0.26979	0.758608	insig	-0.34903	0.416368	insig	-0.606298	0.338114	insig	-3.33636	3.36643e-19	up	-2.31751	1.92737e-05	up	-0.5527	0.718753	insig	-2.06048	9.94813e-06	up
-1.02194	0.00343964	down	-0.450872	0.485435	insig	-0.492794	0.347963	insig	0.549631	0.677928	insig	0.0687327	0.993405	insig	-0.503601	0.34171	insig	PB.875	-0.138161	0.937987	insig	0.0588519	0.90683	insig	-0.436228	0.19138	insig	0.20238	0.668489	insig	0.489725	0.0590555	insig	0.300128	0.428595	insig	0.520244	0.118628	insig	-0.358228	0.236539	insig	-0.0302728	0.958003	insig	0.435399	0.398226	insig
0.493266	0.291418	insig	1.06296	0.0143816	up	0.213905	0.569571	insig	0.547762	0.764029	insig	0.8811	0.268397	insig	0.313532	0.617507	insig	PB.877	-0.625713	0.804482	insig	0.33113	0.680485	insig	0.907453	0.234058	insig	0.961455	0.1891	insig	-0.580838	0.270248	insig	-1.5276	0.0771868	insig	1.91131	2.7758e-06	down	3.0361	8.40515e-09	down	2.60451	7.38292e-12	down	1.18613	0.00297098	down
-0.465015	0.152721	insig	-0.131475	0.870163	insig	0.072241	0.852554	insig	0.313393	0.898604	insig	-0.178063	0.976193	insig	-0.512079	0.0473685	insig	PB.879	0.264875	0.6618	insig	0.152759	0.672652	insig	-0.546795	0.00785071	insig	-0.105258	0.856167	insig	0.694802	0.01131	insig	0.813538	0.00948708	insig	-0.514879	0.0358003	insig	-1.23965	8.0321e-06	up	-0.840369	0.117464	insig	0.073353	0.742106	insig
-0.339001	0.308455	insig	0.0592655	0.926539	insig	0.0291019	0.943123	insig	0.37789	0.814085	insig	0.0592308	0.993405	insig	-0.34103	0.376516	insig	PB.880	0.655875	0.0897128	insig	0.602541	0.0426843	insig	-0.774924	0.0232246	insig	-0.0462977	0.941995	insig	1.37301	4.66424e-06	up	1.43163	0.00017837	up	-0.206189	0.430362	insig	-1.19463	0.000100751	up	-0.792543	0.0502292	insig	0.567096	0.0881515	insig
1.32217	0.0991687	insig	1.95467	0.0446542	up	-0.0911782	0.940106	insig	0.608268	0.854677	insig	2.07372	0.149534	insig	1.44719	0.066873	insig	PB.881	-0.69516	0.569584	insig	-0.545331	0.29942	insig	0.296996	0.658096	insig	0.156245	0.797823	insig	-0.846285	0.00171628	insig	-0.989685	0.036548	insig	-4.74593	9.91054e-24	up	-2.72341	2.73357e-07	up	-2.29269	6.16926e-05	up	-5.16369	9.80286e-38	up
0.0703032	0.885101	insig	-0.283943	0.60207	insig	-0.0375504	0.945594	insig	-0.375925	0.730577	insig	-0.217807	0.946319	insig	0.1378	0.798648	insig	PB.882	-1.19994	0.185491	insig	-0.118994	0.886322	insig	-0.76227	0.237315	insig	1.09068	0.00665808	up	0.639533	0.0465372	insig	-0.438107	0.467453	insig	-1.29765	0.00305933	up	-0.017524	0.971773	insig	-1.50237	4.02433e-06	up	-0.601355	0.0662049	insig
-0.538857	0.0324618	insig	-0.0695341	0.946693	insig	-0.371823	0.245634	insig	0.448774	0.87644	insig	0.329878	0.955822	insig	-0.138667	0.724578	insig	PB.884	-0.0399382	0.980104	insig	0.0769201	0.832584	insig	-0.295234	0.313929	insig	0.123077	0.779895	insig	0.367419	0.138595	insig	0.257763	0.597823	insig	2.0373	1.66077e-22	down	1.54377	1.41034e-11	down	1.85245	0.00329774	down	1.92731	5.34491e-12	down
0.238304	0.692479	insig	0.111376	0.940052	insig	-0.391396	0.596704	insig	-0.145791	0.981496	insig	0.52821	0.955822	insig	0.650888	0.487725	insig	PB.885	-0.39383	0.890697	insig	0.218873	0.780918	insig	-1.37503	0.036708	down	0.619741	0.444848	insig	1.59017	0.00162097	up	0.988155	0.24751	insig	1.89674	1.2457e-06	down	2.5357	1.0598e-05	down	1.74906	0.0704645	insig	2.84967	0.000128762	down
-0.7142	0.617974	insig	0.120095	NA	insig	-1.68316	0.221155	insig	0.815325	NA	insig	1.82868	NA	insig	0.996019	0.13984	insig	PB.886	0.728387	0.906035	insig	3.35467	0.000165237	up	1.19413	0.464245	insig	2.63869	1.06507e-11	up	2.15769	8.50103e-06	up	-0.47008	0.708474	insig	5.1759	0.000251208	down	3.7398	3.74162e-21	down	1.90075	NA	insig	2.26469	0.00206061	down
0.84674	0.0134805	insig	1.24992	0.0279631	up	1.39038	1.84338e-05	up	0.382784	0.867244	insig	-0.115506	0.989854	insig	-0.519948	0.22791	insig	PB.889	-0.300545	0.802307	insig	0.0995947	0.853934	insig	0.100471	0.844005	insig	0.404782	0.346055	insig	-0.00628308	0.988355	insig	-0.397503	0.311875	insig	-0.976223	0.000834345	insig	0.176466	0.660456	insig	0.134025	0.834776	insig	0.285835	0.462083	insig
0.0584698	0.879404	insig	0.253815	0.737529	insig	0.171312	0.615499	insig	0.174753	0.946133	insig	0.11264	0.989854	insig	-0.0836643	0.815778	insig	PB.890	0.0627443	0.979758	insig	-0.100815	0.830221	insig	-0.256228	0.568212	insig	-0.15604	0.718183	insig	0.151247	0.520549	insig	0.320021	0.507611	insig	1.1229	0.000112861	down	1.12547	4.69263e-05	down	1.43974	0.00366595	down	1.51837	1.614e-14	down
-0.504446	0.0387313	insig	-1.51699	1.58412e-05	down	-0.991962	0.0238166	insig	-1.03183	0.0813842	insig	-0.49403	0.864503	insig	0.511479	0.369128	insig	PB.892	-0.307224	0.677963	insig	0.283852	0.38953	insig	-0.472965	0.217812	insig	0.596689	0.0593176	insig	0.751556	0.0208474	insig	0.169388	0.798291	insig	0.0649346	0.779551	insig	-0.126623	0.694077	insig	-1.77491	2.95472e-07	up	-0.481797	0.421867	insig
0.0955611	0.784511	insig	0.736399	0.371109	insig	0.0232364	0.964041	insig	0.618316	0.812112	insig	0.739709	0.805536	insig	0.10513	0.864643	insig	PB.893	-0.255349	0.815318	insig	-0.289964	0.351065	insig	0.127294	0.751882	insig	-0.0277806	0.961579	insig	-0.422003	0.0886295	insig	-0.382065	0.446342	insig	1.29436	2.0496e-09	down	1.65068	1.50635e-08	down	2.2818	0.000332828	down	1.1569	0.00261869	down
0.164746	0.636408	insig	0.566887	0.283343	insig	0.0761441	0.843324	insig	0.38086	0.803224	insig	0.520009	0.746293	insig	0.116889	0.751382	insig	PB.894	-0.0668359	0.969508	insig	0.162997	0.540501	insig	0.393378	0.0560503	insig	0.234856	0.615955	insig	-0.235305	0.332534	insig	-0.456254	0.314955	insig	-2.04469	1.69454e-26	up	-1.8064	7.49889e-11	up	-1.68265	5.00506e-06	up	-2.39264	1.60012e-29	up
-1.01957	0.0636337	insig	-1.92761	0.0147225	down	-1.03896	0.106147	insig	-0.927163	0.573425	insig	-0.853036	0.711092	insig	0.0456715	0.960697	insig	PB.895	-0.0718415	0.979758	insig	-0.676444	0.0971797	insig	-1.26408	0.00281576	down	-0.599661	0.0607376	insig	0.582025	0.0321936	insig	1.19496	0.000178976	up	0.445038	0.400832	insig	-0.497199	0.226602	insig	-0.843169	0.14857	insig	0.640276	0.236178	insig
1.54283	0.0328465	up	0.894952	0.361802	insig	1.13288	0.080325	insig	-0.668969	0.828032	insig	-0.203098	0.980857	insig	0.447089	0.620704	insig	PB.897	1.21127	0.723703	insig	0.21573	0.917613	insig	1.17844	0.399827	insig	-0.989387	0.611901	insig	-0.968487	0.445657	insig	0.0305074	0.989645	insig	1.99933	0.0151639	down	2.3319	0.00383687	down	2.63857	0.00183336	down	1.91662	0.000776391	down
-0.320958	0.368337	insig	0.384449	0.490251	insig	1.407	9.61767e-06	up	0.685759	0.318034	insig	-0.991048	0.0641897	insig	-1.70028	1.08966e-17	down	PB.901	1.63764	0.0328427	up	-0.222281	0.823507	insig	0.409687	0.608433	insig	-1.85633	0.000747756	down	-0.638609	0.254504	insig	1.23217	1.88239e-06	up	0.973167	0.0410622	insig	-0.983413	6.75113e-06	insig	1.53941	0.00443511	down	1.93671	6.22467e-19	down
0.370311	0.483575	insig	-0.970516	0.234132	insig	0.814263	0.104314	insig	-1.35854	0.367228	insig	-1.74954	0.128981	insig	-0.419097	0.534342	insig	PB.902	1.62907	0.0750891	insig	0.119963	0.895876	insig	-2.78382	0.000634951	down	-1.4995	0.0647041	insig	2.89939	0.000155841	up	4.41027	3.56349e-06	up	1.49303	0.000305065	down	0.240986	0.748593	insig	0.365062	0.662982	insig	5.06359	6.2191e-15	down
0.399381	0.308561	insig	0.374517	0.443174	insig	-0.254168	0.534444	insig	-0.0472654	0.988287	insig	0.658459	0.580599	insig	0.684878	0.103769	insig	PB.903	-0.477479	0.748021	insig	-0.423726	0.506752	insig	0.402304	0.446464	insig	0.0593539	0.959828	insig	-0.831002	0.0828289	insig	-0.879134	0.134676	insig	-0.347009	0.341953	insig	0.535829	0.254644	insig	0.410002	0.446713	insig	-1.03367	0.00112614	up
-0.511358	0.0761575	insig	-0.830526	0.0543326	insig	-0.110941	0.809528	insig	-0.338948	0.846994	insig	-0.691713	0.66083	insig	-0.376764	0.459194	insig	PB.904	0.138731	0.926002	insig	-0.123611	0.707862	insig	-0.707226	0.00757079	insig	-0.256528	0.47647	insig	0.578342	0.00646223	insig	0.848072	0.00843611	insig	0.57833	0.00322271	insig	-0.0666309	0.870578	insig	-0.168366	0.721932	insig	1.14553	0.00478551	down
0.423574	0.174468	insig	0.69102	0.221201	insig	1.04036	0.00247086	up	0.246075	0.899633	insig	-0.321478	0.927742	insig	-0.588577	0.0621178	insig	PB.906	0.224275	0.875609	insig	0.41477	0.240444	insig	0.714875	0.027117	insig	0.196435	0.699459	insig	-0.304747	0.288374	insig	-0.48736	0.275046	insig	-0.330509	0.286067	insig	-0.124379	0.693895	insig	-0.0976286	0.861057	insig	-0.0367125	0.924435	insig
0.703143	0.0623168	insig	0.574579	0.371174	insig	0.730754	0.0662293	insig	-0.150695	0.946644	insig	-0.129511	0.985428	insig	0.000317994	0.999482	insig	PB.907	-0.466142	0.49747	insig	-0.14387	0.738427	insig	0.465502	0.113784	insig	0.32714	0.554684	insig	-0.614437	0.0382228	insig	-0.929681	0.057374	insig	-1.11151	0.000127035	up	0.0638688	0.890309	insig	-0.435042	0.380402	insig	-0.874746	0.00749965	insig
-0.216665	0.612883	insig	-0.878256	0.0679319	insig	-0.426624	0.463673	insig	-0.681603	0.478998	insig	-0.422071	0.904965	insig	0.23297	0.75366	insig	PB.908	-0.0127319	0.997215	insig	0.188243	0.651756	insig	-0.317726	0.452564	insig	0.206167	0.541792	insig	0.500595	0.00307973	insig	0.30713	0.430546	insig	-0.29739	0.392769	insig	-0.4935	0.152701	insig	-1.40244	2.58875e-06	up	-0.430411	0.468074	insig
-0.213537	0.727762	insig	-0.884746	0.432065	insig	-0.196884	0.913927	insig	-0.693255	0.858665	insig	-0.665797	NA	insig	0.00465792	0.9983	insig	PB.909	-0.624742	0.849926	insig	-1.60659	0.210794	insig	-2.48745	0.113784	insig	-0.979953	0.389538	insig	0.874331	0.577475	insig	1.86581	0.354486	insig	1.8434	0.00149885	down	2.25835	8.60227e-05	down	2.53088	0.00801878	down	4.10931	0.0111539	down
0.459116	0.205425	insig	0.0681162	0.913253	insig	0.348061	0.278231	insig	-0.411239	0.783623	insig	-0.248422	0.929865	insig	0.14083	0.776936	insig	PB.910	0.515578	0.45027	insig	-0.0362089	0.953085	insig	-0.522334	0.0486101	insig	-0.545859	0.411412	insig	0.481451	0.263822	insig	1.04207	0.0347963	up	-0.339987	0.178468	insig	-0.3907	0.373031	insig	-0.2758	0.597487	insig	0.499488	0.0510016	insig
-0.806368	0.00821897	insig	-0.89998	0.0802305	insig	-0.47031	0.151089	insig	-0.113931	0.965557	insig	-0.402574	0.88762	insig	-0.311647	0.514469	insig	PB.912	-0.323356	0.781832	insig	-0.048938	0.920284	insig	-0.239874	0.565923	insig	0.279948	0.467054	insig	0.185435	0.412453	insig	-0.081613	0.891562	insig	1.0956	9.89298e-06	down	0.618308	0.0910754	insig	0.205533	0.706528	insig	0.836139	0.0124285	insig
-0.0742521	0.799524	insig	-0.886408	0.381481	insig	-1.22943	0.00534638	down	-0.830447	0.783623	insig	0.379364	0.968817	insig	1.18061	0.0151886	up	PB.914	0.281996	0.811237	insig	0.373092	0.274299	insig	-0.0385506	0.943901	insig	0.09596	0.808624	insig	0.406023	0.128614	insig	0.323729	0.440615	insig	-0.3667	0.146289	insig	-0.717879	0.00296572	insig	-1.66381	0.045006	up	-1.58503	0.00323057	up
0.524368	0.0644405	insig	0.626773	0.0571603	insig	1.38669	1.23931e-10	up	0.0832069	0.957015	insig	-0.729586	0.111595	insig	-0.835844	0.000657247	insig	PB.916	1.13936	0.000920838	up	0.492637	0.173404	insig	-1.0652	3.64906e-06	down	-0.639084	0.24144	insig	1.55302	4.46206e-06	up	2.20526	4.96341e-10	up	0.152019	0.510525	insig	-0.457766	0.195983	insig	0.245362	0.575842	insig	2.57149	1.39109e-35	down
-0.643409	0.0279486	insig	-0.977074	0.0844547	insig	-0.769174	0.00858055	insig	-0.35278	0.883696	insig	-0.179358	0.977682	insig	0.149424	0.781098	insig	PB.917	0.0411561	0.988993	insig	-0.292044	0.412537	insig	-0.938122	0.00239756	insig	-0.326602	0.592952	insig	0.640633	0.00770381	insig	0.979621	0.0490709	insig	2.33364	3.78751e-26	down	1.65344	1.51327e-05	down	1.61019	0.00117547	down	2.47247	7.04368e-15	down
1.35785	0.335066	insig	2.61792	0.185031	insig	2.95018	0.0118259	up	1.23346	0.755586	insig	-0.307571	0.984675	insig	-1.56158	0.0240873	down	PB.918	-1.49413	0.0790827	insig	-0.768759	0.445817	insig	0.631457	0.261067	insig	0.730982	0.668274	insig	-1.4047	0.109583	insig	-2.12178	0.00271901	down	-2.94161	0.00282131	up	-0.0754467	0.942268	insig	0.404101	0.786725	insig	-0.646144	0.30464	insig
1.54521	0.00153921	up	2.29323	0.000326973	up	1.81009	2.21915e-05	up	0.72698	0.65871	insig	0.512018	0.833694	insig	-0.23474	0.662659	insig	PB.919	0.0108208	0.997215	insig	0.0609685	0.903202	insig	0.153558	0.693378	insig	0.0565583	0.935988	insig	-0.0971503	0.799707	insig	-0.141291	0.830929	insig	-2.50682	1.56291e-12	up	-0.965141	0.0168351	insig	-0.316365	0.586446	insig	-0.880351	0.00235825	insig
-0.59314	0.0237345	insig	-1.47945	0.00033216	down	-1.52384	0.000417357	down	-0.905863	0.309672	insig	0.074918	0.993405	insig	0.954771	0.0669111	insig	PB.920	0.00561639	0.998944	insig	0.251489	0.445766	insig	-0.830772	0.0035417	insig	0.252254	0.530444	insig	1.07771	4.67202e-06	up	0.838383	0.0402693	insig	1.09644	6.32099e-08	down	0.505041	0.107066	insig	-0.672306	0.114432	insig	0.378612	0.536936	insig
-0.297371	0.235174	insig	-0.500683	0.169382	insig	-0.602499	0.116013	insig	-0.224124	0.833141	insig	0.130279	0.983023	insig	0.331269	0.473771	insig	PB.921	-0.410679	0.47151	insig	-0.147814	0.713164	insig	0.0640909	0.862595	insig	0.268767	0.544143	insig	-0.216448	0.459851	insig	-0.47314	0.160998	insig	-0.372873	0.106812	insig	-0.25249	0.3241	insig	-0.765525	0.016406	insig	-1.06689	0.00750068	up
-0.933441	0.0604489	insig	-1.56183	0.00127512	down	-0.516223	0.273928	insig	-0.647752	0.748211	insig	-1.01656	0.347871	insig	-0.393677	0.603449	insig	PB.922	-0.336514	0.853465	insig	-0.0305901	0.964382	insig	-0.408588	0.418465	insig	0.310765	0.627716	insig	0.373782	0.265388	insig	0.0770639	0.922451	insig	-1.34661	0.000128702	up	-1.93712	0.000239023	up	-2.91745	1.579e-14	up	-1.48554	0.000476191	up
2.46686	6.48863e-11	up	2.26451	0.000292033	up	2.67783	4.16489e-07	up	-0.222638	0.92621	insig	-0.381027	0.94289	insig	-0.177948	0.821203	insig	PB.923	0.668832	0.425735	insig	-0.507431	0.239012	insig	0.797839	0.155522	insig	-1.17013	3.60968e-05	down	-1.30946	0.000878199	down	-0.128086	0.890818	insig	0.91111	0.0373792	insig	2.71473	3.87762e-22	down	3.64506	2.42777e-17	down	2.75825	2.16613e-06	down
-0.583064	0.0344543	insig	-0.581656	0.263248	insig	-0.0509506	0.924407	insig	-0.0182102	0.993728	insig	-0.502544	0.829076	insig	-0.507902	0.258309	insig	PB.925	0.153328	0.849926	insig	0.362612	0.0815152	insig	-0.252729	0.249944	insig	0.215185	0.523337	insig	0.610376	0.00128197	insig	0.407882	0.254382	insig	0.841203	2.54846e-05	insig	0.109841	0.743068	insig	-0.142623	0.781864	insig	1.01483	0.0131292	down
0.598456	0.0742293	insig	0.159474	0.872457	insig	-0.07666	0.856346	insig	-0.460499	0.882704	insig	0.26908	0.972983	insig	0.706098	0.109333	insig	PB.926	0.390713	0.642544	insig	0.524208	0.0309562	insig	0.705358	0.00598757	insig	0.139095	0.798328	insig	-0.185639	0.412681	insig	-0.311249	0.537919	insig	-1.42241	8.91976e-12	up	-1.20785	0.00147395	up	-1.82854	0.00376151	up	-2.23268	2.23792e-12	up
0.953922	0.015643	insig	0.579143	0.471093	insig	-0.331131	0.405742	insig	-0.396515	0.900941	insig	0.943307	0.667571	insig	1.31779	0.0063369	up	PB.927	-0.0573371	0.976032	insig	-0.396233	0.373956	insig	0.668433	0.0171874	insig	-0.334087	0.582641	insig	-1.0692	0.0018722	down	-0.723238	0.0104181	insig	-1.11798	4.28232e-06	up	-0.0994623	0.854185	insig	-0.179333	0.827345	insig	-2.1459	2.83829e-10	up
0.379684	0.328161	insig	0.293483	0.719431	insig	-0.594447	0.0865448	insig	-0.108743	0.974877	insig	0.917211	0.563563	insig	1.00473	0.00229624	up	PB.931	-0.607748	0.0274766	insig	-0.534736	0.202066	insig	0.338482	0.209927	insig	0.0773118	0.931424	insig	-0.877961	0.0322917	insig	-0.944387	0.00109502	insig	-1.54129	2.55874e-09	up	-0.545192	0.101664	insig	-0.752481	0.248056	insig	-2.50017	5.11288e-25	up
0.0933199	0.84944	insig	-0.0116779	0.989479	insig	-0.903087	0.222825	insig	-0.12548	0.951968	insig	0.92174	0.741857	insig	1.02057	0.170964	insig	PB.933	-0.232762	0.939676	insig	-0.800731	0.039688	insig	-0.307082	0.483105	insig	-0.560149	0.513073	insig	-0.498932	0.135761	insig	0.0723582	0.948929	insig	-1.52707	2.12327e-05	up	-1.19416	0.0125879	up	-0.774716	0.10726	insig	-2.14496	0.00346754	up
0.206082	0.491858	insig	-0.189305	0.672623	insig	-0.677111	0.0674111	insig	-0.414944	0.607776	insig	0.518134	0.733039	insig	0.907955	0.0104548	insig	PB.934	-0.430535	0.758016	insig	-0.698211	0.0046182	insig	-0.588014	0.00136777	insig	-0.259977	0.753315	insig	-0.114998	0.71679	insig	0.156114	0.857222	insig	-1.05111	2.13534e-07	up	-0.40746	0.387354	insig	-0.580494	0.0819194	insig	-1.16685	0.00171716	up
1.17623	0.0334137	up	0.471202	0.719572	insig	1.40539	0.00161794	up	-0.721348	0.86546	insig	-0.901519	0.831317	insig	-0.209735	0.821093	insig	PB.936	0.716963	0.766232	insig	1.6715	0.0261554	up	-2.56017	1.61032e-05	down	0.964704	0.666301	insig	4.22663	0.000185089	up	3.27209	6.8589e-05	up	-1.88753	4.52317e-06	up	-1.42505	0.0615451	insig	-3.13296	0.00180936	up	2.05015	0.00031525	down
-1.10201	0.000913261	down	-0.652522	0.518094	insig	-0.702103	0.0893457	insig	0.429454	0.909995	insig	0.0737806	0.993405	insig	-0.378054	0.545534	insig	PB.938	-0.234605	0.942706	insig	-0.71745	0.18244	insig	-0.315856	0.659168	insig	-0.477176	0.458371	insig	-0.40794	0.178173	insig	0.0808399	0.930091	insig	2.06627	1.43202e-08	down	1.20257	0.00813322	down	2.09275	0.00717977	down	1.65179	0.000252251	down
0.0192766	0.965481	insig	0.428634	0.533962	insig	-0.0244474	0.950122	insig	0.388087	0.864213	insig	0.4839	0.850665	insig	0.0735484	0.878249	insig	PB.939	-0.590881	0.464752	insig	-0.669267	0.2082	insig	-0.474758	0.267354	insig	-0.0741145	0.947318	insig	-0.19952	0.732462	insig	-0.115213	0.853019	insig	-1.38587	2.37007e-06	up	-0.769163	0.0226651	insig	-0.327034	0.649653	insig	-0.964051	3.31727e-06	insig
-0.457287	0.175762	insig	-0.581947	0.271275	insig	-0.0861853	0.833399	insig	-0.144686	0.951968	insig	-0.466894	0.826962	insig	-0.345784	0.452781	insig	PB.941	0.236877	0.825897	insig	0.235217	0.533035	insig	0.205025	0.573845	insig	0.00521123	0.995286	insig	0.0255173	0.954755	insig	0.0327644	0.968607	insig	1.17323	2.13337e-08	down	0.485676	0.234334	insig	0.317587	0.547689	insig	0.854278	0.0119948	insig
-0.555508	0.284075	insig	-0.444387	0.698468	insig	-0.386154	0.549003	insig	0.0848134	0.990359	insig	-0.0348497	0.99657	insig	-0.131048	0.914836	insig	PB.942	0.562942	0.332584	insig	0.191244	0.584355	insig	-0.397126	0.217877	insig	-0.365967	0.297285	insig	0.582919	0.00172224	insig	0.961097	0.00178728	insig	1.55693	3.40871e-13	down	0.444209	0.483013	insig	0.880115	0.333302	insig	1.5318	0.0158524	down
0.887512	0.0453011	insig	2.66941	0.316512	insig	3.32877	1.20546e-13	up	1.75523	0.84234	insig	-0.638036	0.983961	insig	-2.40662	2.30364e-05	down	PB.944	-0.346606	0.837556	insig	-0.302703	0.509297	insig	0.685459	0.0452024	insig	0.0474466	0.960258	insig	-0.99287	0.000484257	insig	-1.02696	0.036548	down	-3.01463	2.41571e-28	up	-1.77339	0.000418921	up	-0.0942202	0.972052	insig	-0.404505	0.511349	insig
0.548113	0.300257	insig	1.38298	0.0359426	up	1.11474	0.053007	insig	0.814487	0.344058	insig	0.295636	0.948139	insig	-0.538637	0.286232	insig	PB.945	1.03327	0.00478042	up	0.922675	0.00673572	insig	0.566014	0.19014	insig	-0.103715	0.89703	insig	0.351841	0.463035	insig	0.467488	0.491131	insig	-0.819669	0.0635658	insig	-1.30121	2.96209e-05	up	-0.404319	0.419144	insig	-0.304101	0.590205	insig
1.3427	0.051919	insig	1.90873	0.00200907	up	1.65227	0.0171683	up	0.546479	0.82235	insig	0.284631	0.968727	insig	-0.280999	0.800527	insig	PB.948	-0.112679	0.987827	insig	0.661027	0.414431	insig	1.23599	0.0535994	insig	0.777295	0.637689	insig	-0.579803	0.394795	insig	-1.34153	0.390219	insig	0.394426	0.552644	insig	1.85593	0.0477403	down	1.60216	0.00117267	down	0.779113	0.284387	insig
-0.55922	0.0386836	insig	0.147387	0.825423	insig	-0.0882634	0.823952	insig	0.686275	0.521324	insig	0.264885	0.94289	insig	-0.443001	0.10519	insig	PB.949	0.370239	0.833957	insig	0.132289	0.853843	insig	1.18041	0.019983	up	-0.232306	0.696615	insig	-1.05224	0.00362504	down	-0.808987	0.0785576	insig	1.39777	7.45994e-05	down	0.473722	0.0737283	insig	1.3688	0.00215697	down	0.097018	0.803206	insig
-0.374028	0.279133	insig	-0.635293	0.298851	insig	-0.213897	0.597843	insig	-0.28158	0.886078	insig	-0.38968	0.86928	insig	-0.131058	0.660011	insig	PB.951	0.307788	0.744302	insig	0.0193889	0.953085	insig	-0.495839	0.017845	insig	-0.282077	0.562395	insig	0.51022	0.0142676	insig	0.803785	0.0683739	insig	0.854377	0.00213369	insig	0.178405	0.6155	insig	0.162382	0.763944	insig	1.10573	1.16495e-07	down
-0.306112	0.422901	insig	-0.30869	0.568903	insig	0.278209	0.60088	insig	-0.0234425	0.990359	insig	-0.556164	0.716898	insig	-0.553023	0.20382	insig	PB.952	-0.120887	0.948286	insig	0.386325	0.290729	insig	0.405126	0.206287	insig	0.512211	0.295769	insig	-0.0232923	0.953667	insig	-0.522676	0.275803	insig	1.22403	9.0691e-05	down	1.04487	0.000335255	down	0.489079	0.140639	insig	1.06307	0.00924234	down
0.729326	0.0274482	insig	0.42838	0.705077	insig	-0.400524	0.191981	insig	-0.321815	0.937867	insig	0.863376	0.802959	insig	1.16109	0.000436953	up	PB.953	-0.0261998	0.992608	insig	-0.19341	0.686921	insig	0.316667	0.541937	insig	-0.164219	0.689707	insig	-0.515965	0.0909935	insig	-0.338016	0.483717	insig	-2.19426	3.90396e-14	up	-1.43261	5.77085e-06	up	-1.60977	0.0473162	up	-2.94149	2.38616e-23	up
0.573282	0.600671	insig	2.78546	0.0385827	up	2.73001	1.76298e-05	up	2.18563	0.491043	insig	0.0834038	0.993405	insig	-2.12054	0.0113064	down	PB.954	-0.232019	0.957977	insig	0.12525	0.906243	insig	1.09093	0.0769556	insig	0.358853	0.800611	insig	-0.971581	0.114336	insig	-1.31526	0.146712	insig	-2.13892	0.000149639	up	-1.32615	0.194028	insig	0.473906	0.737324	insig	-0.53475	0.438421	insig
-0.199422	0.917498	insig	1.76679	0.269216	insig	1.42729	0.366807	insig	1.94836	0.418631	insig	0.362857	0.98366	insig	-1.60476	0.280493	insig	PB.955	-0.495309	0.837132	insig	-0.466348	0.674985	insig	-0.0313103	0.974447	insig	0.0325541	0.988362	insig	-0.4405	0.666163	insig	-0.4608	0.703515	insig	-2.95078	0.000647155	up	-2.65513	0.00369104	up	-0.764512	0.474697	insig	-1.53148	0.192217	insig
1.80999	0.0031406	up	2.44097	0.00390707	up	1.60657	0.040508	up	0.609605	0.835382	insig	0.867148	0.821309	insig	0.23795	0.831663	insig	PB.958	-0.0101378	0.998971	insig	0.536202	0.309141	insig	0.324302	0.60168	insig	0.550287	0.482927	insig	0.207781	0.621663	insig	-0.329716	0.738372	insig	-3.09963	2.16911e-11	up	-1.27076	0.0344509	up	-1.2336	0.0610337	insig	-1.84944	0.00611427	up
-0.695583	0.174406	insig	-1.94578	0.0118599	down	-1.29776	0.00615641	down	-1.26865	0.48267	insig	-0.617843	0.874822	insig	0.628028	0.297887	insig	PB.959	1.86972	1.67232e-06	up	0.264952	0.595896	insig	-2.98782	1.10097e-13	down	-1.59921	2.49723e-10	down	3.2481	2.22705e-28	up	4.86112	2.61364e-63	up	-1.24988	0.00129063	up	-3.81104	1.12814e-23	up	-3.49965	1.68277e-09	up	0.405035	0.44824	insig
0.402639	0.13976	insig	0.814139	0.030288	insig	0.155695	0.717013	insig	0.391807	0.651308	insig	0.689147	0.493053	insig	0.275681	0.489392	insig	PB.960	-0.131876	0.969508	insig	-0.230719	0.547619	insig	0.680515	0.000682952	insig	-0.0965458	0.937026	insig	-0.915973	0.00134187	insig	-0.805595	0.280435	insig	0.27823	0.248237	insig	0.818791	0.104141	insig	1.28371	0.000186556	down	-0.278889	0.432006	insig
1.71288	0.000705273	up	3.42132	8.87999e-07	up	3.15448	6.25034e-14	up	1.68463	0.214666	insig	0.29132	0.968817	insig	-1.41156	0.00406159	down	PB.961	-0.266819	0.901587	insig	0.576408	0.131298	insig	0.805284	0.0108999	insig	0.846065	0.137357	insig	-0.234274	0.519897	insig	-1.0662	0.0421709	down	-3.11166	1.21531e-19	up	-1.12637	0.0342382	up	-0.31312	0.684042	insig	-0.794138	0.051125	insig
1.18145	0.375856	insig	3.58059	0.00491681	up	4.20357	7.97109e-08	up	2.37614	0.425427	insig	-0.597845	0.949	insig	-2.9884	0.00236558	down	PB.962	-0.327324	0.821684	insig	0.275621	0.635175	insig	0.302649	0.586318	insig	0.610067	0.311605	insig	-0.0312845	0.958418	insig	-0.628989	0.293769	insig	-4.70698	8.50609e-20	up	-3.19383	0.000263902	up	-1.4527	0.148788	insig	-0.840666	0.292532	insig
0.914116	0.186385	insig	1.85514	0.190026	insig	1.94268	0.014716	up	0.913907	0.846673	insig	-0.0640245	0.994588	insig	-0.993913	0.277786	insig	PB.963	0.174102	0.966031	insig	0.457713	0.340882	insig	0.619783	0.160507	insig	0.286282	0.807485	insig	-0.166767	0.737197	insig	-0.440081	0.710697	insig	-1.99407	1.43566e-05	up	-1.2463	0.0834949	insig	-0.648429	0.608967	insig	-0.705369	0.411136	insig
-0.235351	0.421324	insig	-0.107403	0.873431	insig	0.0292203	0.937484	insig	0.107393	0.958216	insig	-0.108662	0.985461	insig	-0.237042	0.281186	insig	PB.965	0.104934	0.930805	insig	0.165852	0.511296	insig	-0.0404028	0.895984	insig	0.0669744	0.880083	insig	0.201431	0.375567	insig	0.147522	0.78331	insig	1.00967	6.02435e-06	down	0.674562	0.00353415	insig	0.696159	0.105533	insig	1.04726	1.66653e-08	down
-0.0456918	0.941118	insig	-0.303719	0.790372	insig	-1.91153	0.000288033	down	-0.277215	0.939293	insig	1.63683	0.327698	insig	1.89	4.2436e-05	up	PB.966	0.0558958	0.989668	insig	1.1414	0.032875	up	-1.56998	0.00595645	down	1.09574	0.0910536	insig	2.70699	1.79047e-20	up	1.62266	0.00672283	up	0.735444	0.148982	insig	0.638213	0.222759	insig	-0.748541	0.35534	insig	0.365624	0.529891	insig
1.17624	0.00428192	up	3.27567	0.00389281	up	2.56299	5.6171e-11	up	2.07409	0.440354	insig	0.739126	0.927742	insig	-1.35118	0.0118649	down	PB.967	0.101074	0.982556	insig	-0.0577201	0.940581	insig	2.31819	1.80366e-08	up	-0.159153	0.904899	insig	-2.38208	1.91983e-19	down	-2.20856	0.000736219	down	-0.969658	0.00936598	insig	0.110851	0.890252	insig	2.31563	0.0323614	down	-0.75798	0.107893	insig
-1.90196	3.4786e-05	down	-2.24174	0.0046146	down	-2.32898	8.02082e-06	down	-0.358724	0.917801	insig	0.116437	0.993405	insig	0.449814	0.533006	insig	PB.969	-0.452782	0.841703	insig	1.02737	0.0159272	up	-1.554	0.00270441	down	1.48907	0.00210287	up	2.5764	2.3197e-23	up	1.0978	0.122332	insig	4.22437	5.40862e-23	down	2.77822	1.45499e-08	down	0.914624	0.197909	insig	3.41928	1.53881e-10	down
1.70517	0.000257461	up	2.52346	0.0283643	up	0.377843	0.510631	insig	0.79435	0.873797	insig	2.17793	0.375175	insig	1.36569	0.0410798	up	PB.971	-0.466999	0.657993	insig	-0.77706	0.200325	insig	0.419816	0.345813	insig	-0.306033	0.770398	insig	-1.20121	0.0283331	down	-0.884217	0.0179655	insig	-1.94242	2.89164e-11	up	0.237748	0.716642	insig	1.31709	0.269176	insig	-2.01641	8.64198e-05	up
0.317454	0.202553	insig	0.866676	0.00441364	insig	0.175596	0.643358	insig	0.528672	0.311554	insig	0.720389	0.339975	insig	0.171137	0.680827	insig	PB.976	0.10282	0.940513	insig	-0.50976	0.200385	insig	0.56553	0.0175181	insig	-0.608688	0.249084	insig	-1.08026	0.00260251	down	-0.460213	0.169217	insig	0.286137	0.197838	insig	0.506071	0.0296922	insig	1.62252	1.45144e-05	down	-0.136215	0.703013	insig
-0.492915	0.032933	insig	-0.504682	0.261422	insig	-0.994979	4.35227e-06	insig	-0.0311809	0.990487	insig	0.520923	0.692878	insig	0.528843	0.0178134	insig	PB.978	0.163298	0.894644	insig	0.00508626	0.991005	insig	0.0239117	0.947468	insig	-0.152213	0.749957	insig	-0.0238741	0.938002	insig	0.141267	0.817605	insig	1.44999	1.11787e-14	down	0.798794	0.00193062	insig	0.901393	0.0155631	insig	0.400007	0.0897317	insig
-0.765053	0.0650159	insig	-0.823507	0.258394	insig	-1.28284	0.00980066	down	-0.078976	0.984679	insig	0.492749	0.913718	insig	0.548979	0.397539	insig	PB.979	0.0989531	0.96948	insig	-0.340906	0.519096	insig	0.261828	0.52238	insig	-0.434638	0.543257	insig	-0.608039	0.151039	insig	-0.161688	0.790648	insig	-1.78838	1.12307e-08	up	-2.64883	1.97345e-13	up	-2.31398	4.09602e-05	up	-3.36484	1.53609e-13	up
0.786905	0.615473	insig	-0.289908	0.906259	insig	-0.21053	0.936961	insig	-1.0928	0.828155	insig	-0.0424909	0.997704	insig	1.02616	0.660596	insig	PB.980	-0.711712	0.435911	insig	0.402114	0.35519	insig	1.17813	0.000457129	up	1.11778	0.0304456	up	-0.780844	0.0187328	insig	-1.88442	8.65621e-05	down	-5.39504	2.88135e-24	up	-3.9019	8.55406e-08	up	-6.12767	2.73762e-25	up	-6.81994	1.73155e-12	up
-0.205932	0.388086	insig	-0.931991	0.208742	insig	-1.25226	3.69185e-05	down	-0.74522	0.71796	insig	0.355283	0.954679	insig	1.07402	0.000959044	up	PB.981	0.0140239	0.994385	insig	-0.0761566	0.840266	insig	-0.692182	0.00172985	insig	-0.0853416	0.876751	insig	0.610749	0.0193533	insig	0.708193	0.0300587	insig	-0.365833	0.0430303	insig	-0.579451	0.0166261	insig	-1.25712	0.0526739	insig	-0.953833	0.0100071	insig
-1.09835	7.28596e-05	down	-1.39044	0.00828736	down	-1.43151	0.000126591	down	-0.312452	0.895129	insig	0.0713387	0.993405	insig	0.359687	0.510241	insig	PB.984	0.618057	0.446428	insig	0.283872	0.529054	insig	-0.0831571	0.89892	insig	-0.330283	0.159246	insig	0.361059	0.239719	insig	0.702718	0.105677	insig	1.97579	2.35357e-11	down	0.263923	0.420854	insig	0.263996	0.642867	insig	0.599504	0.235699	insig
-1.42733	0.000402988	down	-3.3549	8.20342e-05	down	-2.08646	6.42314e-05	down	-1.94483	0.315819	insig	-1.23351	0.715423	insig	0.681015	0.406935	insig	PB.985	0.310338	0.922807	insig	-0.759128	0.183172	insig	-1.52686	0.00302763	down	-1.0624	0.115201	insig	0.761533	0.0655229	insig	1.83551	0.000526827	up	3.83564	2.49595e-27	down	2.10187	8.39038e-05	down	1.20429	0.19517	insig	3.24922	2.53162e-07	down
-0.256788	0.24194	insig	-0.603809	0.066445	insig	-0.457591	0.0889969	insig	-0.366898	0.614756	insig	-0.11514	0.976471	insig	0.22914	0.431331	insig	PB.986	-0.0935048	0.975798	insig	0.232434	0.612707	insig	-1.04575	0.00749682	down	0.333962	0.541072	insig	1.27382	1.96751e-13	up	0.951577	0.0465808	insig	1.95589	1.83757e-12	down	1.79823	3.3258e-09	down	1.07943	4.52886e-05	down	2.51182	6.22861e-24	down
-1.4924	0.00271036	down	-2.5427	1.28375e-06	down	-1.20725	0.155081	insig	-1.06901	0.291571	insig	-1.30633	0.616711	insig	-0.266923	0.839402	insig	PB.987	-0.48274	0.360976	insig	0.4374	0.0896681	insig	-1.21739	9.17979e-07	down	0.926312	0.000304145	insig	1.65007	1.24072e-16	up	0.736447	0.0781285	insig	0.137457	0.751598	insig	-0.866108	0.0692868	insig	-2.88314	9.9713e-32	up	0.124715	0.908615	insig
-0.86194	0.00041357	insig	-0.863803	0.156727	insig	-0.69031	0.100111	insig	-0.0222906	0.993728	insig	-0.146966	0.986111	insig	-0.147474	0.819342	insig	PB.988	-0.124393	0.939676	insig	-0.579871	0.0184812	insig	-0.322773	0.292397	insig	-0.450052	0.137431	insig	-0.262437	0.193134	insig	0.200182	0.669478	insig	1.32002	1.08855e-09	down	0.58773	0.033996	insig	0.997346	0.0588165	insig	0.924697	0.0465943	insig
0.140865	0.652437	insig	0.0162376	0.980032	insig	-0.148307	0.638063	insig	-0.144359	0.932255	insig	0.193292	0.949998	insig	0.315541	0.121888	insig	PB.989	-0.0695161	0.973827	insig	-0.615054	0.0768299	insig	0.0721459	0.881701	insig	-0.539115	0.191294	insig	-0.691794	0.0220757	insig	-0.139339	0.830495	insig	1.89754	5.76763e-14	down	2.11328	2.29588e-22	down	2.48885	1.02883e-12	down	1.64562	5.45166e-17	down
-0.486113	0.0670919	insig	-0.22836	0.78881	insig	-0.191828	0.612063	insig	0.237346	0.934142	insig	-0.00861943	0.998035	insig	-0.267116	0.480632	insig	PB.990	0.522388	0.638087	insig	-0.140662	0.78726	insig	-0.464865	0.314325	insig	-0.656129	0.211065	insig	0.318702	0.410667	insig	0.986006	0.0590468	insig	2.04818	1.64812e-14	down	1.0431	0.00201742	down	1.9201	0.000903248	down	2.28972	3.17531e-11	down
NA	NA	insig	NA	NA	insig	NA	NA	insig	NA	NA	insig	NA	NA	insig	NA	NA	insig	PB.994	0.294006	0.890697	insig	0.238504	0.683523	insig	0.08456	0.901756	insig	-0.0493254	0.959733	insig	0.149686	0.773162	insig	0.213387	0.836678	insig	-9.10021	5.13516e-12	up	-9.61761	1.56102e-11	up	-9.57768	3.21245e-12	up	-9.37767	1.7552e-11	up
0.5153	0.064568	insig	0.335405	0.709055	insig	-0.39992	0.144303	insig	-0.200636	0.951968	insig	0.768856	0.760613	insig	0.945512	0.00165668	insig	PB.995	0.0282332	0.986705	insig	-0.0347424	0.928739	insig	0.185054	0.476653	insig	-0.058191	0.903387	insig	-0.225082	0.332866	insig	-0.154744	0.66291	insig	-1.36227	9.51002e-13	up	-0.869036	0.00166576	insig	-1.03078	0.123153	insig	-1.97637	1.27701e-17	up
1.01967	0.196912	insig	1.72041	0.0358301	up	1.46172	0.0365398	up	0.678454	0.741613	insig	0.284953	0.955822	insig	-0.411162	0.621463	insig	PB.996	-1.70999	0.137663	insig	-0.486322	0.604062	insig	-0.492017	0.615706	insig	1.22766	0.0984834	insig	0.00196468	0.998035	insig	-1.21109	0.0809848	insig	-3.68914	5.15722e-09	up	-0.950877	0.178529	insig	-1.52165	0.00440309	up	-1.7637	0.000141681	up
0.836603	0.00271036	insig	0.982054	0.068697	insig	0.105672	0.723952	insig	0.123962	0.962746	insig	0.908062	0.428552	insig	0.762285	0.00970592	insig	PB.997	-0.162258	0.922807	insig	-0.556642	0.187083	insig	0.625372	0.0602393	insig	-0.390112	0.549817	insig	-1.18657	0.00192247	down	-0.785265	0.0577994	insig	-0.587788	0.012719	insig	0.418343	0.223403	insig	0.910945	0.0999182	insig	-1.13644	5.92394e-06	up
-0.056719	0.89807	insig	1.17836	0.31475	insig	0.641276	0.0756777	insig	1.21354	0.686165	insig	0.561708	0.94289	insig	-0.669193	0.0764632	insig	PB.1000	0.565786	0.552107	insig	0.794078	0.0474549	insig	0.586821	0.313928	insig	0.233992	0.734403	insig	0.202064	0.7169	insig	-0.0203168	0.986264	insig	1.09364	0.000290434	down	0.476695	0.248751	insig	1.44038	0.153337	insig	1.11695	0.0102459	down
-0.106409	0.720806	insig	-0.50251	0.298639	insig	-0.410769	0.119296	insig	-0.416501	0.729505	insig	-0.0598477	0.993405	insig	0.333104	0.152122	insig	PB.1001	-0.20162	0.905108	insig	0.0155908	0.968007	insig	-0.615861	0.0505044	insig	0.224365	0.684155	insig	0.626879	0.0189293	insig	0.415188	0.484417	insig	-1.51878	1.71207e-13	up	-1.41618	3.94041e-06	up	-2.07515	1.13711e-09	up	-1.34388	2.20355e-06	up
0.88697	0.133309	insig	2.4067	0.0643239	insig	1.32342	0.0167797	up	1.49482	0.666346	insig	1.10901	0.82929	insig	-0.405097	0.539061	insig	PB.1003	0.264321	0.820384	insig	0.155154	0.750137	insig	1.15415	8.05819e-06	up	-0.105639	0.880582	insig	-1.0044	0.000652041	down	-0.88621	0.00797683	insig	-3.25265	4.23764e-19	up	-2.62258	2.46785e-11	up	-1.04695	0.384586	insig	-3.113	1.01554e-18	up
2.31469	0.025262	up	4.6507	0.000248746	up	1.3368	0.0985612	insig	2.30784	0.48846	insig	3.34454	0.0450422	up	1.0218	0.397499	insig	PB.1004	0.706154	0.606197	insig	1.13318	0.0138348	up	1.6417	0.00308038	up	0.429689	0.464454	insig	-0.513865	0.234072	insig	-0.93229	0.15185	insig	-3.53146	6.72727e-10	up	-1.91477	0.0449445	up	-0.0574098	0.968205	insig	-3.86219	1.94366e-20	up
-1.07226	0.00300214	down	-0.972141	0.290332	insig	-0.537005	0.297136	insig	0.0786628	0.989455	insig	-0.409075	0.954866	insig	-0.50932	0.330146	insig	PB.1007	0.254866	0.908378	insig	0.0503486	0.931541	insig	-0.516701	0.0310979	insig	-0.196316	0.84531	insig	0.562237	0.167548	insig	0.770441	0.262567	insig	2.37054	7.3616e-16	down	1.04893	0.0171463	down	1.3091	0.0946998	insig	2.32188	1.99224e-07	down
-0.649044	0.462293	insig	0.262936	0.856528	insig	-0.17286	0.852336	insig	0.890619	0.812112	insig	0.455829	0.955822	insig	-0.453295	0.65521	insig	PB.1008	0.0406405	0.996733	insig	-0.449478	0.756218	insig	1.13445	0.27965	insig	-0.484279	0.815001	insig	-1.58881	0.103932	insig	-1.09324	0.55116	insig	1.62161	0.0196593	down	0.935988	0.399059	insig	2.28703	0.01894	down	0.286944	0.715174	insig
-1.26392	0.00244161	down	-1.25563	0.0133869	down	-0.718335	0.114162	insig	-0.0119754	0.996946	insig	-0.505627	0.757684	insig	-0.519174	0.305994	insig	PB.1009	0.0938476	0.95302	insig	0.45454	0.0619356	insig	0.193895	0.546866	insig	0.364902	0.271422	insig	0.255412	0.248015	insig	-0.0970867	0.863582	insig	1.17038	0.000297271	down	-0.181349	0.697748	insig	-0.580696	0.0747773	insig	0.228379	0.585957	insig
1.48109	0.00503791	up	1.46683	0.0861914	insig	0.943676	0.133546	insig	-0.0386011	0.993728	insig	0.551227	0.900295	insig	0.571006	0.371565	insig	PB.1010	0.172789	0.939676	insig	0.518352	0.233254	insig	0.930346	0.00504481	insig	0.349048	0.667238	insig	-0.416787	0.354284	insig	-0.754129	0.248326	insig	-1.22659	0.00495805	up	0.0906845	0.885202	insig	-0.319549	0.682711	insig	-1.24238	0.0104005	up
0.527407	0.18375	insig	1.02868	0.202556	insig	-0.0254854	0.954024	insig	0.478668	0.886601	insig	1.08635	0.603497	insig	0.587794	0.249272	insig	PB.1012	-0.460098	0.230023	insig	-0.190639	0.732329	insig	0.449594	0.0820983	insig	0.273678	0.709371	insig	-0.644993	0.138019	insig	-0.908003	0.00199982	insig	-2.06792	9.56431e-27	up	-1.07378	0.00835824	up	-0.88955	0.252529	insig	-2.57433	7.49599e-19	up
-1.44953	0.00822472	down	-2.26809	0.00047064	down	-1.19043	0.092998	insig	-0.83787	0.562334	insig	-1.04575	0.602729	insig	-0.236619	0.817207	insig	PB.1013	0.0127669	0.998514	insig	-0.224989	0.725242	insig	-0.664931	0.208432	insig	-0.230866	0.800377	insig	0.434153	0.187056	insig	0.677162	0.318707	insig	1.74519	0.000326242	down	0.288141	0.658039	insig	-0.336799	0.495379	insig	1.19277	0.0789422	insig
-0.122454	0.802561	insig	-0.265329	0.753807	insig	-0.256647	0.528129	insig	-0.16386	0.957015	insig	0.0166271	0.997332	insig	0.160325	0.766589	insig	PB.1014	0.545248	0.498587	insig	0.251974	0.614158	insig	0.370281	0.603165	insig	-0.287562	0.636462	insig	-0.122887	0.855505	insig	0.175664	0.8787	insig	2.00679	4.08331e-11	down	1.3455	0.000520651	down	1.44932	0.011562	down	1.35064	0.00297028	down
-0.557779	0.0592359	insig	-0.269079	0.751591	insig	-0.345157	0.253984	insig	0.268137	0.92621	insig	0.103147	0.992886	insig	-0.185451	0.606482	insig	PB.1015	0.536919	0.368684	insig	0.142511	0.73996	insig	-0.0464704	0.92304	insig	-0.388123	0.351449	insig	0.18423	0.5584	insig	0.58492	0.229867	insig	1.428	1.06575e-08	down	0.338532	0.321849	insig	0.97701	0.108814	insig	1.09686	2.80878e-06	down
-0.222685	0.259405	insig	-0.470292	0.183104	insig	-0.429775	0.051528	insig	-0.267852	0.805485	insig	-0.0112217	0.997101	insig	0.234052	0.36233	insig	PB.1016	-0.0690283	0.969508	insig	-0.792793	3.53177e-05	insig	-0.180094	0.462965	insig	-0.718122	0.0354158	insig	-0.617848	0.00297253	insig	0.111382	0.854264	insig	1.56244	2.44963e-25	down	1.41417	2.94497e-08	down	1.84615	1.82253e-10	down	1.2831	1.04515e-08	down
0.299	0.606675	insig	1.86562	1.00113e-09	up	0.591639	0.179355	insig	1.54267	0.084451	insig	1.30394	0.0548837	insig	-0.254862	0.768539	insig	PB.1017	-0.473159	0.400433	insig	0.135326	0.789262	insig	-0.22788	0.287343	insig	0.614921	0.304407	insig	0.358489	0.3806	insig	-0.24146	0.678138	insig	-2.12567	7.14757e-29	up	-1.34744	0.0139441	up	-0.437651	0.323667	insig	-1.33971	0.00120619	up
-0.73827	0.0377357	insig	-0.52866	0.400244	insig	-0.903265	0.00668627	insig	0.188409	0.933655	insig	0.402565	0.858606	insig	0.193471	0.60872	insig	PB.1020	-0.335485	0.846951	insig	0.597267	0.123431	insig	1.19353	0.00173435	up	0.938002	0.0115721	insig	-0.600862	0.0080346	insig	-1.5256	0.000196196	down	2.07456	6.61581e-10	down	1.67682	9.74756e-07	down	0.907188	0.0403618	insig	-0.055248	0.825991	insig
0.374403	0.401228	insig	1.89757	0.00186996	up	0.895318	0.234142	insig	1.50131	0.0708468	insig	1.0302	0.711092	insig	-0.486415	0.597297	insig	PB.1021	2.0637	4.05159e-05	up	-0.149335	0.827038	insig	0.798318	0.072849	insig	-2.20638	1.43258e-06	down	-0.95283	0.0161826	insig	1.26361	0.00769182	up	0.75841	0.0600489	insig	-0.928966	0.0209991	insig	2.76298	5.06682e-08	down	0.816352	0.320435	insig
0.0594095	0.871109	insig	0.0813933	0.883256	insig	0.0294735	0.954295	insig	0.00131443	0.999335	insig	0.0818039	0.992119	insig	0.0594738	0.919554	insig	PB.1023	0.0778172	0.973827	insig	-0.439471	0.197282	insig	0.369931	0.174173	insig	-0.513519	0.402364	insig	-0.814336	0.0082495	insig	-0.288119	0.690786	insig	1.2113	2.2273e-07	down	1.19944	0.000335833	down	1.6935	5.09183e-07	down	0.839467	0.0197997	insig
-0.243415	0.386367	insig	-0.163196	0.831814	insig	-0.366756	0.218374	insig	0.0606441	0.986806	insig	0.233648	0.963375	insig	0.150704	0.570076	insig	PB.1025	1.02636	0.0189713	up	0.350329	0.44462	insig	0.266943	0.559442	insig	-0.671185	0.101477	insig	0.0778162	0.852342	insig	0.762771	0.026811	insig	3.01287	3.63923e-29	down	1.74659	2.99099e-19	down	2.4606	7.27614e-07	down	2.34669	6.50366e-30	down
1.32368	0.00167721	up	1.92017	0.00679109	up	2.01169	8.43303e-08	up	0.574784	0.842324	insig	-0.0642449	0.993405	insig	-0.658693	0.249516	insig	PB.1026	-0.234691	0.864117	insig	0.0262102	0.947496	insig	0.442936	0.0970087	insig	0.265343	0.620139	insig	-0.421451	0.065185	insig	-0.674034	0.167417	insig	-2.21014	9.85397e-20	up	-0.646304	0.197309	insig	-0.361513	0.623554	insig	-0.673223	0.112823	insig
0.560825	0.0530202	insig	0.13508	0.883905	insig	-0.781438	0.0468382	insig	-0.446423	0.868619	insig	0.948848	0.660585	insig	1.37049	0.000546495	up	PB.1027	0.689687	0.956358	insig	0.578241	0.845703	insig	0.0119117	0.997904	insig	-0.107715	0.792814	insig	0.560044	0.841893	insig	0.68613	0.889549	insig	-0.743816	0.669042	insig	-0.868367	0.00110075	insig	-1.22667	0.0440482	up	-1.57158	0.470616	insig
0.906811	0.164519	insig	0.534774	0.748632	insig	2.54158	0.000322447	up	-0.391159	0.944154	insig	-1.97232	0.517328	insig	-1.60228	0.0431286	down	PB.1028	0.185639	0.940262	insig	0.591711	0.190099	insig	-1.02472	0.0259905	down	0.41374	0.601923	insig	1.61172	0.000259063	up	1.21078	0.135172	insig	-2.19668	3.93333e-08	up	-1.4706	0.0105198	up	-2.29568	0.0179602	up	1.33507	0.107839	insig
-0.235713	0.856045	insig	0.689215	0.65753	insig	1.14318	0.256378	insig	0.902229	0.833104	insig	-0.425672	0.974346	insig	-1.34555	0.207493	insig	PB.1029	0.159328	0.966222	insig	-0.176857	0.844309	insig	-0.836213	0.28562	insig	-0.329737	0.770612	insig	0.654803	0.392458	insig	0.997113	0.449427	insig	-1.84965	0.00238541	up	-2.23706	0.00593226	up	-1.02655	0.290663	insig	0.0976868	0.928074	insig
0.447675	0.560496	insig	0.257452	0.853823	insig	1.61828	0.0451438	up	-0.209127	0.951968	insig	-1.32962	0.5727	insig	-1.14105	0.0661506	insig	PB.1030	0.792218	0.234693	insig	0.726465	0.0665724	insig	-0.519476	0.234058	insig	-0.0586901	0.950731	insig	1.24084	0.000731261	up	1.31304	0.00809596	up	-0.81403	0.195682	insig	-1.15718	0.000956859	up	-1.33013	0.0533782	insig	1.28478	0.0560866	insig
-0.708603	0.0501545	insig	-0.202302	0.852802	insig	-0.503611	0.17255	insig	0.485927	0.883727	insig	0.32557	0.965339	insig	-0.179608	0.734676	insig	PB.1033	-0.0576881	0.980104	insig	0.512163	0.164103	insig	-0.0494091	0.93054	insig	0.576196	0.208379	insig	0.557001	0.111074	insig	-0.00538575	0.995126	insig	2.19722	3.61975e-15	down	1.55196	2.59281e-05	down	1.4421	0.0490432	down	1.70902	1.5207e-07	down
0.838968	0.0694924	insig	0.833971	0.388397	insig	-0.970631	0.0669004	insig	-0.0276666	0.995129	insig	1.8387	0.210402	insig	1.84314	0.000126577	up	PB.1034	-0.865645	0.285514	insig	-0.624112	0.280489	insig	0.699675	0.0756065	insig	0.244599	0.833299	insig	-1.32916	0.00606942	down	-1.5642	0.00689654	down	-0.404944	0.302331	insig	1.30569	0.0101079	down	1.01284	0.223344	insig	-2.10513	6.38475e-07	up
0.0942498	0.825614	insig	0.273588	0.714042	insig	-0.175506	0.64166	insig	0.156551	0.953984	insig	0.478615	0.850665	insig	0.301056	0.447135	insig	PB.1037	-0.0675929	0.947478	insig	0.239907	0.352356	insig	-0.0538598	0.846367	insig	0.313698	0.361254	insig	0.289076	0.242545	insig	-0.0106322	0.982912	insig	-1.86051	6.82069e-16	up	-1.69125	1.94813e-09	up	-1.86965	8.99056e-05	up	-2.01122	5.84867e-19	up
-0.153627	0.754876	insig	-1.23302	0.00809755	down	-0.726091	0.149141	insig	-1.09765	0.291924	insig	-0.475802	0.887733	insig	0.594366	0.366515	insig	PB.1038	1.64368	1.41013e-05	up	0.656482	0.0182768	insig	0.0244021	0.955245	insig	-0.982631	0.0208	insig	0.62696	0.0223575	insig	1.62395	0.000159148	up	0.998091	0.000103277	insig	-0.793979	0.0896095	insig	-0.931344	0.0231398	insig	0.220139	0.722228	insig
0.217955	0.343913	insig	0.544324	0.0677262	insig	-0.0712467	0.835007	insig	0.305838	0.65871	insig	0.645692	0.298993	insig	0.318726	0.252201	insig	PB.1039	-0.0196032	0.989668	insig	-0.510082	0.182299	insig	0.57313	0.00418578	insig	-0.486531	0.382061	insig	-1.08811	0.00177149	down	-0.59003	0.0440719	insig	0.468209	0.0145258	insig	0.711473	0.000683715	insig	1.48379	7.26436e-05	down	-0.208038	0.433407	insig
-0.0764839	0.859647	insig	0.369135	0.470033	insig	0.354127	0.40326	insig	0.424783	0.657137	insig	0.043255	0.993405	insig	-0.402926	0.299943	insig	PB.1040	-0.448917	0.910696	insig	0.78228	0.165229	insig	0.278297	0.740738	insig	1.23487	0.159544	insig	0.499962	0.218681	insig	-0.721339	0.573779	insig	0.918914	0.0347512	insig	1.2993	0.0406112	down	0.46641	0.233028	insig	0.96504	0.0117128	insig
0.169714	0.605084	insig	-0.549751	0.380448	insig	-0.93866	0.0115792	insig	-0.740347	0.625852	insig	0.422127	0.913497	insig	1.13774	0.00582527	up	PB.1041	-0.300692	0.629791	insig	-0.0345931	0.912205	insig	-0.482143	0.0392024	insig	0.272695	0.41237	insig	0.442903	0.0338404	insig	0.18312	0.699211	insig	-1.21182	2.52104e-11	up	-0.734107	0.0158805	insig	-1.76509	0.000176261	up	-1.69542	4.66403e-05	up
0.517929	0.129405	insig	0.447014	0.611695	insig	0.668615	0.042094	insig	-0.0912462	0.98126	insig	-0.196205	0.98083	insig	-0.125078	0.696828	insig	PB.1042	0.00887109	0.998514	insig	-0.165527	0.667545	insig	-0.802245	0.00308191	insig	-0.169617	0.809385	insig	0.631876	0.0495433	insig	0.815124	0.171459	insig	0.437715	0.144027	insig	0.951959	0.0045253	insig	1.01132	0.125436	insig	1.87756	3.2973e-18	down
0.135112	0.60786	insig	0.538056	0.191572	insig	0.231842	0.519407	insig	0.382666	0.711345	insig	0.336252	0.884612	insig	-0.0677295	0.888524	insig	PB.1043	-0.0179557	0.99047	insig	-0.289647	0.467744	insig	0.322973	0.0628944	insig	-0.268058	0.668274	insig	-0.617606	0.0746003	insig	-0.337633	0.384712	insig	0.509361	0.00625677	insig	0.668002	0.00413015	insig	1.29684	0.00124206	down	0.385766	0.24097	insig
0.213163	0.564767	insig	0.432517	0.602988	insig	-0.15178	0.736321	insig	0.198359	0.946644	insig	0.616068	0.822811	insig	0.394262	0.270533	insig	PB.1044	-0.519352	0.367859	insig	-0.0836177	0.861327	insig	-1.06904	0.000171459	down	0.443521	0.242435	insig	0.981132	6.3035e-05	insig	0.551163	0.0823055	insig	-3.14726	3.73321e-31	up	-2.40703	4.87603e-25	up	-2.67265	1.27276e-06	up	-2.25846	9.42245e-16	up
-2.29496	0.00429571	down	-0.463202	0.794542	insig	-2.0013	0.0231105	down	1.80709	0.545295	insig	1.56195	0.684193	insig	-0.257331	0.824518	insig	PB.1046	-0.180414	0.954197	insig	-0.343104	0.76262	insig	-0.158623	0.83117	insig	-0.15773	0.936306	insig	-0.188951	0.868389	insig	-0.0188145	0.988659	insig	1.53492	0.0308553	down	-0.576879	0.467866	insig	1.37494	0.278831	insig	-0.347435	0.6553	insig
-0.0434104	0.895372	insig	-0.288152	0.819571	insig	-1.26162	2.74598e-06	down	-0.263356	0.951968	insig	1.00911	0.774018	insig	1.24677	7.74267e-07	up	PB.1048	-0.255233	0.876056	insig	0.155056	0.781094	insig	-0.929357	0.0132076	insig	0.417712	0.443807	insig	1.08024	0.00100385	up	0.675187	0.144573	insig	0.18838	0.547668	insig	0.406524	0.152942	insig	-0.294724	0.782674	insig	-0.173812	0.615065	insig
1.54232	0.564767	insig	1.93544	0.68281	insig	4.09871	0.000511495	up	0.36366	0.989455	insig	-2.16559	0.80717	insig	-2.54688	0.0614634	insig	PB.1049	1.36427	0.829594	insig	-0.580134	0.853125	insig	-1.62257	0.557013	insig	-1.92694	0.61526	insig	1.04173	0.785617	insig	2.97433	0.390219	insig	-2.34623	0.146282	insig	-2.16614	0.322079	insig	0.0991496	0.97918	insig	3.36213	0.015832	down
0.355045	0.157099	insig	0.555939	0.112524	insig	0.000233432	0.999593	insig	0.180738	0.895283	insig	0.586601	0.552734	insig	0.384555	0.236129	insig	PB.1051	0.0722331	0.975798	insig	-0.164058	0.731666	insig	0.695099	0.0108494	insig	-0.232061	0.730599	insig	-0.863727	0.00388191	insig	-0.618881	0.156011	insig	0.697906	0.00284139	insig	0.986574	0.00097244	insig	1.37919	6.90146e-05	down	-0.0293419	0.928285	insig
-1.34013	0.0237463	down	-1.00949	0.335141	insig	-0.445278	0.278788	insig	0.308558	0.952653	insig	-0.542632	0.93892	insig	-0.869123	0.302224	insig	PB.1052	1.54229	0.7753	insig	0.0545347	NA	insig	0.991151	0.658046	insig	-1.48701	0.535066	insig	-0.941047	0.602874	insig	0.551337	0.326083	insig	1.81586	0.134572	insig	-1.05832	0.160446	insig	0.719283	0.610375	insig	0.357108	0.447334	insig
-0.268195	0.538813	insig	0.0975191	0.90391	insig	-0.17226	0.771716	insig	0.345405	0.846994	insig	0.296778	0.949495	insig	-0.0700679	0.92333	insig	PB.1053	0.784157	0.588077	insig	-0.018138	0.979303	insig	0.0893924	0.863662	insig	-0.793828	0.383509	insig	-0.11278	0.822745	insig	0.692768	0.459972	insig	-0.327975	0.370717	insig	-1.37736	0.0140482	up	-0.256067	0.664368	insig	-0.61993	0.183858	insig
-0.318171	0.148329	insig	-0.129406	0.814012	insig	-0.311307	0.261955	insig	0.168108	0.921047	insig	0.210189	0.952616	insig	0.0202251	0.963188	insig	PB.1054	-0.156429	0.890697	insig	-0.381813	0.20997	insig	-0.201858	0.42579	insig	-0.219959	0.675106	insig	-0.185058	0.572904	insig	0.047164	0.935599	insig	0.883197	1.77931e-06	insig	0.726765	0.00114242	insig	1.09683	0.00538787	down	0.743846	0.00343845	insig
0.094954	0.76052	insig	-0.0623706	0.893311	insig	-0.626177	0.0141253	insig	-0.177229	0.848721	insig	0.593915	0.242116	insig	0.748716	3.93964e-05	insig	PB.1056	-0.767474	0.0272118	insig	-1.68583	0.00102456	down	-0.282055	0.312774	insig	-0.914606	0.298729	insig	-1.40874	0.0185706	down	-0.484074	0.243998	insig	0.77488	0.000380559	insig	1.64351	1.23768e-12	down	2.36114	2.72487e-05	down	0.400016	0.0719557	insig
-0.394536	0.201776	insig	-1.49774	0.0111077	down	-0.997319	0.160649	insig	-1.12244	0.380088	insig	-0.467256	0.948139	insig	0.625648	0.496513	insig	PB.1057	-0.47292	0.283162	insig	-0.346454	0.178418	insig	-1.12681	4.42921e-05	down	0.133099	0.778061	insig	0.775721	0.00591776	insig	0.656136	0.123857	insig	-0.287577	0.178832	insig	-0.201131	0.588473	insig	-1.4751	0.00590878	up	-0.180002	0.84907	insig
-0.138397	0.725179	insig	-0.255061	0.573526	insig	0.461944	0.171038	insig	-0.13642	0.939293	insig	-0.686976	0.481058	insig	-0.573142	0.131198	insig	PB.1058	-0.888156	0.0180384	insig	0.160201	0.791277	insig	-0.748678	0.0137246	insig	1.05413	0.0542581	insig	0.903724	0.0445717	insig	-0.134996	0.844528	insig	-1.48479	1.60859e-11	up	-0.728674	0.042735	insig	-1.93985	1.01566e-05	up	-0.307208	0.414051	insig
1.46255	0.000383066	up	2.26553	0.000651786	up	0.473304	0.307956	insig	0.78026	0.729505	insig	1.82319	0.0803312	insig	1.02354	0.0504897	insig	PB.1059	-0.839871	0.179808	insig	-0.537057	0.476171	insig	-7.38648	2.75251e-31	down	0.306023	0.807485	insig	6.8458	9.19158e-17	up	6.54994	3.00354e-19	up	-2.30646	2.95939e-15	up	0.00255315	0.997072	insig	0.454671	0.620019	insig	5.52164	5.69765e-15	down
-0.482581	0.176933	insig	-1.32332	0.0182122	down	-0.376221	0.347963	insig	-0.862839	0.449279	insig	-0.919907	0.41407	insig	-0.0781182	0.879823	insig	PB.1060	-0.729353	0.414461	insig	-0.134805	0.823126	insig	-1.31008	0.00384937	down	0.60261	0.0280997	insig	1.17148	4.82163e-08	up	0.582139	0.188268	insig	0.0321872	0.940845	insig	0.287362	0.40612	insig	-1.19774	0.00676913	up	0.936597	0.003592	insig
-0.39555	0.279715	insig	-0.763581	0.272813	insig	0.0545252	0.908242	insig	-0.388048	0.872904	insig	-0.787666	0.660585	insig	-0.423868	0.180253	insig	PB.1064	0.0172597	0.995219	insig	0.31544	0.392925	insig	-0.201894	0.659151	insig	0.304728	0.430688	insig	0.513004	0.0459599	insig	0.221475	0.716882	insig	0.892662	0.00382887	insig	0.488659	0.134252	insig	-0.226598	0.728368	insig	1.12025	9.01547e-06	down
-0.219296	0.552548	insig	-0.435189	0.592591	insig	0.794656	0.000260385	insig	-0.235693	0.942777	insig	-1.20543	0.377451	insig	-0.991199	0.00209521	insig	PB.1065	0.223467	0.865354	insig	0.477974	0.0818537	insig	-1.2322	0.00137651	down	0.258443	0.591165	insig	1.70488	3.10936e-07	up	1.46128	0.00330111	up	2.64948	1.04273e-39	down	2.21302	1.95444e-10	down	1.69853	0.00471959	down	4.64518	4.61346e-45	down
-1.35336	0.000181145	down	-1.46913	0.00246849	down	-1.10946	0.0039479	down	-0.135346	0.957015	insig	-0.329454	0.929865	insig	-0.218475	0.733372	insig	PB.1067	0.390976	0.587446	insig	0.330195	0.546847	insig	-0.0860337	0.831246	insig	-0.0537724	0.959733	insig	0.411457	0.433743	insig	0.478463	0.392364	insig	1.97016	1.92738e-14	down	0.231094	0.637136	insig	0.130514	0.847463	insig	0.916932	0.0281667	insig
-0.245727	0.251116	insig	-0.601197	0.141429	insig	-0.402123	0.133899	insig	-0.375745	0.736268	insig	-0.168484	0.968817	insig	0.184082	0.584739	insig	PB.1068	-0.026521	0.988993	insig	-0.0612208	0.86759	insig	-0.297272	0.312591	insig	-0.029086	0.953685	insig	0.231051	0.289232	insig	0.272839	0.571147	insig	1.10178	4.48033e-09	down	0.888945	4.45026e-05	insig	0.524076	0.159929	insig	0.968369	0.000377924	insig
1.01695	0.00251012	up	0.972461	0.111792	insig	0.12867	0.721094	insig	-0.0676198	0.989127	insig	0.875475	0.586025	insig	0.922684	0.0216243	insig	PB.1070	-0.24966	0.927033	insig	-0.583815	0.270649	insig	0.722352	0.0437204	insig	-0.331731	0.759121	insig	-1.31076	0.00408645	down	-0.966997	0.144191	insig	-0.381586	0.157873	insig	0.892722	0.0844913	insig	1.13365	0.0732939	insig	-1.00467	0.000831573	up
0.451042	0.739563	insig	-0.397488	0.882734	insig	-0.0938133	0.95029	insig	-0.862661	0.909407	insig	-0.261391	0.993405	insig	0.570595	0.677738	insig	PB.1071	0.354531	0.871154	insig	0.342923	0.71259	insig	-0.483599	0.478041	insig	-0.00431421	0.99839	insig	0.822082	0.297783	insig	0.84084	0.410196	insig	-2.33674	0.000334747	up	-2.2367	0.00666994	up	-3.11852	0.0147885	up	-1.97789	0.00565104	up
-0.364736	0.233419	insig	-0.795229	0.010413	insig	-0.367041	0.217912	insig	-0.449969	0.677928	insig	-0.399835	0.783312	insig	0.0257699	0.966362	insig	PB.1072	-0.0938459	0.962359	insig	-0.255108	0.480016	insig	-0.752226	0.0138315	insig	-0.154619	0.714351	insig	0.492761	0.0250576	insig	0.659668	0.0444993	insig	-1.02437	8.00885e-06	up	-1.2879	3.90817e-05	up	-1.60449	1.37393e-09	up	-0.667874	0.028304	insig
-0.634081	0.0365015	insig	-1.00065	0.0182122	down	-0.518864	0.274553	insig	-0.386958	0.774892	insig	-0.453302	0.869167	insig	-0.0908468	0.904595	insig	PB.1073	-0.332143	0.555102	insig	0.138344	0.622328	insig	-0.454768	0.0149321	insig	0.477169	0.189843	insig	0.588165	0.0104261	insig	0.124142	0.819116	insig	-0.310957	0.161674	insig	-0.606337	0.0598832	insig	-1.48918	1.41872e-05	up	-0.402069	0.449175	insig
-0.391236	0.810493	insig	-0.700021	0.754385	insig	-1.21843	0.422541	insig	-0.330663	0.965252	insig	0.551237	0.976989	insig	0.859712	0.609236	insig	PB.1074	0.0801696	0.977306	insig	-0.352796	0.368259	insig	0.330601	0.281429	insig	-0.430324	0.572202	insig	-0.688549	0.037792	insig	-0.245252	0.781199	insig	-5.11427	7.73086e-27	up	-5.56113	1.03369e-20	up	-5.48882	1.31316e-13	up	-6.66453	1.64518e-33	up
0.654319	0.0118935	insig	0.633618	0.319621	insig	0.0183684	0.961241	insig	-0.0416693	0.99102	insig	0.646024	0.737816	insig	0.665201	0.00740601	insig	PB.1076	0.339751	0.563693	insig	-0.0355391	0.926726	insig	0.740695	6.94793e-06	insig	-0.371318	0.371177	insig	-0.78135	0.000389062	insig	-0.397389	0.31607	insig	-0.877035	8.2707e-06	insig	-0.556036	0.0479368	insig	-0.247934	0.688547	insig	-1.62934	3.54497e-19	up
-1.0844	0.0150618	down	-2.89164	1.28355e-11	down	-1.12068	0.00357582	down	-1.82492	0.0686793	insig	-1.74226	0.0282119	down	0.0568557	0.955486	insig	PB.1077	-0.483048	0.737028	insig	-1.08981	0.00105529	down	-1.94642	1.75604e-07	down	-0.597717	0.299671	insig	0.852611	0.0030992	insig	1.46286	0.00580617	up	-1.39271	1.87892e-06	up	-1.98593	0.000224132	up	-3.23311	4.40779e-17	up	-0.594089	0.227241	insig
-0.850094	0.035217	insig	-1.01392	0.0540519	insig	-0.226048	0.727078	insig	-0.183025	0.944154	insig	-0.757892	0.740002	insig	-0.601078	0.385988	insig	PB.1078	0.291125	0.832703	insig	0.362587	0.429633	insig	-0.167364	0.77857	insig	0.0758976	0.929046	insig	0.524771	0.237882	insig	0.460355	0.589946	insig	2.03748	1.5642e-12	down	0.902274	0.0572799	insig	0.623546	0.20943	insig	1.95304	0.000851168	down
0.618044	0.149733	insig	0.979526	0.0847134	insig	0.555145	0.210525	insig	0.340305	0.842324	insig	0.454461	0.827262	insig	0.0924702	0.867956	insig	PB.1079	0.0321275	0.996762	insig	0.215475	0.84363	insig	0.882267	0.257692	insig	0.183593	0.91002	insig	-0.672649	0.294075	insig	-0.843715	0.477929	insig	0.795533	0.138512	insig	1.3834	0.0161795	down	1.52135	0.0046786	down	0.435657	0.260989	insig
0.21617	0.534867	insig	-0.211686	0.845972	insig	-0.936537	0.0270718	insig	-0.446677	0.895665	insig	0.761181	0.826962	insig	1.1854	0.00276521	up	PB.1080	3.07238	8.41123e-19	up	-0.501926	0.478341	insig	0.508363	0.631459	insig	-3.56882	2.88687e-24	down	-1.01538	0.239538	insig	2.56268	0.000582505	up	5.54865	4.95025e-81	down	2.69623	2.93624e-28	down	5.80269	1.26393e-17	down	4.07023	2.48405e-11	down
0.192747	0.474252	insig	-0.354494	0.766933	insig	-0.942776	0.0180222	insig	-0.567799	0.882704	insig	0.620952	0.916452	insig	1.16285	0.00582527	up	PB.1082	-0.0346237	0.982346	insig	0.296999	0.220623	insig	-0.00909534	0.983127	insig	0.336727	0.161117	insig	0.300881	0.197947	insig	-0.0220069	0.968492	insig	-1.24242	2.62806e-11	up	-1.00886	1.70745e-05	up	-1.93574	0.0197709	up	-2.20339	8.54199e-07	up
1.3041	0.00226027	up	1.91238	0.0655934	insig	1.8098	0.000168074	up	0.588874	0.892146	insig	0.126574	0.993405	insig	-0.480721	0.429309	insig	PB.1083	1.067	0.15777	insig	0.00231845	0.99825	insig	0.624088	0.225788	insig	-1.05698	0.0390606	down	-0.626565	0.0961369	insig	0.441897	0.557926	insig	1.53664	0.000114643	down	1.77834	2.91555e-05	down	3.40842	7.30178e-05	down	2.68891	1.31514e-08	down
-0.509826	0.0610555	insig	0.302229	0.704795	insig	0.289027	0.356517	insig	0.791097	0.611444	insig	0.0409904	0.993405	insig	-0.769724	6.14329e-05	insig	PB.1084	-0.325198	0.638087	insig	-0.317471	0.278905	insig	-0.758265	0.00662464	insig	0.0131267	0.983866	insig	0.43615	0.120764	insig	0.436057	0.403456	insig	0.843675	0.000634073	insig	0.6644	0.0047622	insig	1.42457	0.00940382	down	1.85784	9.1842e-16	down
-0.181829	0.535142	insig	-0.303606	0.511789	insig	-0.0897452	0.789113	insig	-0.14272	0.917801	insig	-0.18541	0.94289	insig	-0.0642063	0.811162	insig	PB.1085	0.73943	0.0408756	insig	-0.0789522	0.858736	insig	-0.0323764	0.943901	insig	-0.812431	0.0075934	insig	-0.0514406	0.891902	insig	0.772918	0.0534859	insig	1.34485	1.03023e-08	down	0.430292	0.066869	insig	1.08103	0.000902011	down	1.25769	6.12521e-10	down
-0.499383	0.105682	insig	-0.346078	0.562948	insig	-0.679596	0.00767475	insig	0.13434	0.955163	insig	0.362422	0.885121	insig	0.205091	0.588355	insig	PB.1086	0.181903	0.809922	insig	-0.305925	0.183556	insig	-0.0859388	0.790514	insig	-0.481971	0.0542318	insig	-0.224842	0.358995	insig	0.269507	0.527638	insig	1.41712	7.93756e-12	down	0.7407	0.0160512	insig	1.33754	0.00152653	down	0.792535	0.000419246	insig
-0.463152	0.243643	insig	0.598288	0.489479	insig	0.662169	0.164877	insig	1.03906	0.514066	insig	-0.0360997	0.994368	insig	-1.09841	0.00404946	down	PB.1087	0.0819487	0.978257	insig	-0.0257226	0.97203	insig	0.333657	0.560572	insig	-0.103905	0.846111	insig	-0.365243	0.169682	insig	-0.249906	0.52084	insig	-0.624701	0.131372	insig	-1.16315	1.24835e-05	up	-0.0443657	0.956295	insig	-0.3229	0.467275	insig
1.42197	0.144429	insig	2.83365	0.0484597	up	2.18826	0.00365979	up	1.38376	0.719944	insig	0.667542	0.94289	insig	-0.735954	0.331431	insig	PB.1089	1.02007	0.173013	insig	1.46915	2.60234e-06	up	0.962321	0.0217078	insig	0.454565	0.41237	insig	0.50274	0.0291324	insig	0.0626295	0.947281	insig	-4.19131	5.85608e-15	up	-3.78449	1.19333e-12	up	-2.88172	0.0030564	up	-2.9933	6.82141e-21	up
0.290912	0.435844	insig	0.503256	0.352033	insig	0.436297	0.287648	insig	0.190575	0.930025	insig	0.0942639	0.991755	insig	-0.114133	0.855147	insig	PB.1090	0.125649	0.955267	insig	0.780524	0.0149643	insig	0.609555	0.181637	insig	0.660699	0.0762483	insig	0.166503	0.680509	insig	-0.482094	0.45577	insig	0.942167	0.00151333	insig	1.11286	0.00162715	down	0.623487	0.138356	insig	0.736881	0.0861489	insig
-0.108337	0.721213	insig	0.0906135	0.915399	insig	0.0240793	0.954295	insig	0.178611	0.948752	insig	0.0924199	0.993405	insig	-0.107703	0.822893	insig	PB.1093	0.233917	0.836645	insig	-0.23732	0.524574	insig	0.082233	0.848865	insig	-0.466804	0.137433	insig	-0.324997	0.189421	insig	0.154665	0.738589	insig	0.887215	9.23248e-05	insig	0.549615	0.0384977	insig	1.17586	0.033813	down	0.799421	0.012604	insig
-0.829675	0.0768481	insig	-1.0294	0.217981	insig	-0.232617	0.65741	insig	-0.219274	0.951537	insig	-0.765992	0.749005	insig	-0.569876	0.199463	insig	PB.1095	0.467863	0.738775	insig	-0.35847	0.506051	insig	-0.181377	0.794114	insig	-0.82137	0.0346191	insig	-0.183061	0.656745	insig	0.650387	0.277383	insig	3.4597	8.07367e-19	down	2.16463	7.09458e-08	down	2.75015	6.49062e-06	down	3.37473	1.20845e-37	down
-0.728213	0.037166	insig	-1.01041	0.170052	insig	-0.202963	0.842018	insig	-0.301925	0.919481	insig	-0.780431	0.884317	insig	-0.50433	0.64567	insig	PB.1098	-0.712731	0.0674442	insig	-0.616054	0.00843045	insig	-1.35229	7.49733e-05	down	0.103486	0.864459	insig	0.731647	0.0498942	insig	0.642252	0.344294	insig	-1.18948	1.25912e-06	up	-1.19997	0.0007307	up	-1.62265	0.00473805	up	-0.0643387	0.954289	insig
0.119645	0.826144	insig	-0.536972	0.813336	insig	1.10208	0.00796254	up	-0.677879	0.92933	insig	-1.61214	0.788638	insig	-0.958603	0.0189892	insig	PB.1099	-1.05171	0.77219	insig	-0.241442	0.872958	insig	-0.668728	0.682196	insig	0.818219	0.283873	insig	0.425113	0.616085	insig	-0.375936	0.823618	insig	-0.978203	0.235665	insig	0.203745	0.754885	insig	-1.32115	0.427537	insig	0.765789	0.310159	insig
NA	NA	insig	NA	NA	insig	NA	NA	insig	NA	NA	insig	NA	NA	insig	NA	NA	insig	PB.1100	-0.645431	0.891806	insig	-0.244033	0.872902	insig	-0.550464	0.717055	insig	0.407647	0.847878	insig	0.30231	0.833212	insig	-0.0945711	0.977451	insig	-6.45479	0.000177829	up	-6.03052	0.0361749	up	-6.44887	0.00111994	up	-6.09273	0.0179536	up
0.611526	0.235649	insig	1.32914	0.111801	insig	1.2269	0.00313693	up	0.694429	0.792806	insig	0.128607	0.992708	insig	-0.585382	0.263303	insig	PB.1101	-0.211341	0.905108	insig	0.302595	0.425148	insig	0.451871	0.234339	insig	0.519481	0.18611	insig	-0.15388	0.607382	insig	-0.660502	0.223777	insig	-1.6421	9.25277e-07	up	-0.812513	0.0959312	insig	-0.661271	0.351427	insig	-0.897237	0.0095696	insig
0.045968	0.864567	insig	-0.286548	0.723085	insig	-0.714948	0.000164612	insig	-0.352889	0.899121	insig	0.460579	0.900295	insig	0.789844	0.000353718	insig	PB.1102	-0.0691217	0.954912	insig	0.273578	0.214974	insig	0.114624	0.66825	insig	0.348058	0.182922	insig	0.154254	0.478155	insig	-0.180656	0.649862	insig	-0.457159	0.00485079	insig	-0.335518	0.156831	insig	-1.05767	0.0725945	insig	-1.31672	1.32529e-10	up
0.46415	0.335645	insig	1.79918	0.0190446	up	1.88805	5.49975e-05	up	1.31346	0.399861	insig	-0.0616385	0.993405	insig	-1.3944	0.0043863	down	PB.1103	-0.196586	0.893344	insig	0.0858102	0.80383	insig	0.347169	0.143555	insig	0.286935	0.563123	insig	-0.266126	0.222142	insig	-0.539588	0.25375	insig	-3.75602	1.55269e-52	up	-3.08951	9.88462e-20	up	-2.08821	0.000417764	up	-2.24872	4.30634e-07	up
0.00436222	0.990957	insig	0.594063	0.146766	insig	0.323429	0.290257	insig	0.567836	0.542918	insig	0.298202	0.90759	insig	-0.288744	0.436116	insig	PB.1104	-0.00379848	0.998971	insig	0.0498602	0.910208	insig	0.0955489	0.808009	insig	0.0604375	0.895648	insig	-0.0500755	0.844672	insig	-0.097979	0.826294	insig	-1.26314	6.15772e-09	up	-1.24849	1.24457e-07	up	-0.760902	0.0288751	insig	-1.06728	0.000103097	up
0.920687	0.0542242	insig	1.58204	0.110036	insig	1.35656	0.000456296	up	0.638741	0.863102	insig	0.251453	0.983195	insig	-0.406464	0.463332	insig	PB.1105	-0.92123	0.556191	insig	0.166877	0.781727	insig	0.796077	0.035709	insig	1.09613	0.228619	insig	-0.634131	0.0886295	insig	-1.72101	0.0299698	down	-2.59573	2.27517e-15	up	-0.749168	0.32628	insig	-1.22791	0.146642	insig	-2.06631	3.11008e-12	up
0.668841	0.0397488	insig	0.573785	0.452054	insig	-0.135209	0.70838	insig	-0.117528	0.974877	insig	0.738852	0.752264	insig	0.834886	0.0333948	insig	PB.1106	-0.195811	0.809922	insig	0.058341	0.848033	insig	-0.108297	0.698349	insig	0.26037	0.302071	insig	0.161846	0.325161	insig	-0.085723	0.84818	insig	-2.27967	1.13902e-37	up	-1.40873	2.029e-05	up	-1.80707	0.00123723	up	-2.33537	2.65104e-18	up
-0.445364	0.0914156	insig	-1.03402	0.00115068	down	-0.802078	0.0599457	insig	-0.608426	0.426846	insig	-0.202063	0.972196	insig	0.380854	0.508325	insig	PB.1110	-0.0227508	0.990699	insig	-0.521682	0.198771	insig	-0.0660134	0.874621	insig	-0.495283	0.372533	insig	-0.461104	0.240143	insig	0.0456762	0.945102	insig	0.928212	1.39789e-05	insig	0.511566	0.0943845	insig	0.377246	0.394576	insig	0.165475	0.769808	insig
0.0500657	0.900501	insig	-0.380384	0.462016	insig	-0.404896	0.327176	insig	-0.450217	0.597135	insig	0.0552978	0.993405	insig	0.481777	0.166617	insig	PB.1111	-0.217214	0.882568	insig	-0.339483	0.13865	insig	-0.376418	0.132737	insig	-0.115138	0.854786	insig	0.0322392	0.908511	insig	0.159749	0.818435	insig	-1.03471	4.70823e-05	up	-0.761601	0.0185444	insig	-1.11624	0.000187226	up	-1.09245	0.00147344	up
-1.53982	0.00118926	down	-1.93559	0.00138541	down	-1.29487	0.0412666	down	-0.41618	0.791754	insig	-0.60978	0.830372	insig	-0.219787	0.802979	insig	PB.1112	0.149341	0.932043	insig	-0.169061	0.713541	insig	0.308695	0.3886	insig	-0.313884	0.565889	insig	-0.483045	0.139965	insig	-0.157634	0.819152	insig	2.5366	3.11034e-10	down	0.852714	0.0294735	insig	0.731108	0.0696183	insig	0.905344	0.157924	insig
0.36597	0.449535	insig	0.968348	0.254161	insig	0.3136	0.492443	insig	0.579858	0.844638	insig	0.687022	0.83772	insig	0.085851	0.912165	insig	PB.1113	0.057668	0.969508	insig	0.345141	0.2082	insig	-0.2154	0.486046	insig	0.29418	0.419187	insig	0.555988	0.0244914	insig	0.275531	0.512014	insig	-2.87578	1.83792e-33	up	-2.56147	2.60261e-12	up	-2.29591	0.000225977	up	-2.37845	3.87136e-14	up
-0.381332	0.420557	insig	-0.6173	0.392865	insig	-0.267383	0.500184	insig	-0.256078	0.936001	insig	-0.321792	0.947963	insig	-0.0867995	0.912165	insig	PB.1115	1.01899	0.00336402	up	1.00768	0.00312215	up	0.267062	0.45178	insig	-0.00474549	0.996254	insig	0.736016	0.0610311	insig	0.752543	0.121209	insig	1.30455	3.5699e-07	down	-0.0901639	0.882366	insig	-0.35958	0.603941	insig	0.736916	0.0258164	insig
-0.117012	0.717095	insig	0.17149	0.820388	insig	0.158655	0.610129	insig	0.267335	0.906414	insig	0.039009	0.993405	insig	-0.24888	0.313914	insig	PB.1116	0.0642696	0.969508	insig	-0.00491161	0.991248	insig	0.365458	0.137347	insig	-0.0638502	0.909943	insig	-0.375223	0.13516	insig	-0.298621	0.494792	insig	1.01511	2.63167e-06	down	0.840712	0.000514168	insig	1.15271	0.0219449	down	0.778739	7.79185e-05	insig
-1.27407	0.339722	insig	-1.7794	0.176552	insig	-0.29083	0.670057	insig	-0.532216	0.933655	insig	-1.46362	0.689306	insig	-0.946695	0.342063	insig	PB.1119	-0.818621	0.72008	insig	-0.228655	0.907057	insig	0.000468428	0.999735	insig	0.593791	0.831506	insig	-0.235125	0.889329	insig	-0.81045	0.435874	insig	3.83397	1.51364e-14	down	3.38439	0.0171177	down	2.24347	0.0797788	insig	3.51141	4.11051e-22	down
-1.07903	0.000848747	down	-0.775626	0.257093	insig	-0.787381	0.0393712	insig	0.282844	0.908076	insig	0.0398574	0.993405	insig	-0.265148	0.512024	insig	PB.1120	-0.358385	0.791646	insig	-0.051324	0.927936	insig	-0.715726	0.0281114	insig	0.313826	0.621433	insig	0.658992	0.0255878	insig	0.357789	0.498526	insig	0.271456	0.42958	insig	-0.444789	0.215529	insig	-0.492637	0.424057	insig	0.168849	0.644897	insig
-0.247686	NA	insig	0.745017	NA	insig	1.57249	0.429462	insig	0.969884	NA	insig	-0.810814	0.977798	insig	-1.79582	0.551534	insig	PB.1122	-0.668011	0.954912	insig	-0.872406	0.728974	insig	-0.126352	0.813988	insig	-0.208289	0.974069	insig	-0.751859	0.767714	insig	-0.528999	0.916277	insig	1.07985	0.453856	insig	1.51275	NA	insig	2.66726	NA	insig	2.74731	0.00214324	down
0.535261	0.204993	insig	1.30611	0.0298331	up	0.823826	0.0765286	insig	0.749019	0.450962	insig	0.507629	0.788382	insig	-0.263565	0.52121	insig	PB.1123	-0.799688	0.603809	insig	-0.674832	0.251705	insig	0.307618	0.627636	insig	0.126715	0.925955	insig	-0.988427	0.0351565	insig	-1.09894	0.122251	insig	-1.35236	0.00137119	up	-0.00976568	0.988289	insig	0.587603	0.315277	insig	-0.864006	0.0210151	insig
-0.0956292	0.848542	insig	-0.600199	0.377704	insig	-0.517176	0.260086	insig	-0.524993	0.681212	insig	-0.0528678	0.993405	insig	0.44914	0.122452	insig	PB.1124	0.204807	0.836645	insig	0.208323	0.492647	insig	-0.0201976	0.959922	insig	0.00883265	0.986876	insig	0.223267	0.294146	insig	0.227489	0.60624	insig	-0.164655	0.669524	insig	-0.458554	0.0569969	insig	-1.01406	0.0137987	up	-0.69169	0.0128404	insig
-0.875725	0.00701485	insig	-1.77976	0.0109815	down	-1.19808	0.0189717	down	-0.922272	0.629068	insig	-0.546353	0.913497	insig	0.346807	0.627884	insig	PB.1125	0.296252	0.891153	insig	-0.448342	0.301992	insig	-1.09658	0.02957	down	-0.739214	0.0786436	insig	0.64249	0.0926413	insig	1.39511	0.00678516	up	2.60097	1.06796e-15	down	1.43411	6.74675e-05	down	1.23451	0.0562455	insig	2.47087	4.52477e-05	down
0.0837208	0.719612	insig	0.0412817	0.915848	insig	-0.382852	0.0337311	insig	-0.0631835	0.957015	insig	0.454174	0.516385	insig	0.495405	0.00514826	insig	PB.1126	0.0285826	0.987827	insig	-0.0225737	0.941313	insig	-0.225037	0.300837	insig	-0.0453391	0.931217	insig	0.197352	0.321546	insig	0.255027	0.545481	insig	-1.07195	4.91366e-13	up	-1.01151	1.31196e-05	up	-1.04854	6.22882e-06	up	-1.26102	2.94279e-13	up
-0.210727	0.263317	insig	-0.197665	0.646963	insig	-0.124828	0.553898	insig	-0.00765571	0.997263	insig	-0.0448073	0.993405	insig	-0.058168	0.807412	insig	PB.1129	-0.0366169	0.98262	insig	-0.225276	0.366328	insig	0.00493292	0.989196	insig	-0.183272	0.519729	insig	-0.235427	0.0898516	insig	-0.0397746	0.933902	insig	1.07579	1.27901e-09	down	0.907033	1.49208e-06	insig	1.06339	0.000320557	down	0.914917	4.27869e-10	insig
-0.386048	0.0866173	insig	-0.250708	0.51253	insig	-0.0809392	0.784223	insig	0.115446	0.925975	insig	-0.139692	0.958934	insig	-0.277815	0.203339	insig	PB.1130	0.286104	0.642544	insig	0.371346	0.227867	insig	0.0910177	0.773944	insig	0.0908805	0.868747	insig	0.275258	0.336648	insig	0.198108	0.565503	insig	1.68663	1.79387e-17	down	1.01954	6.98721e-08	down	1.02297	0.00108757	down	1.48232	1.09947e-16	down
-0.887328	0.0015699	insig	-1.04554	0.0443724	down	-0.920169	0.00157085	insig	-0.17757	0.944154	insig	-0.096238	0.992422	insig	0.0570969	0.926713	insig	PB.1131	0.0609848	0.975937	insig	-0.1332	0.710415	insig	-0.320063	0.342097	insig	-0.189027	0.528746	insig	0.181504	0.338636	insig	0.383398	0.262965	insig	2.22519	2.93214e-24	down	1.282	1.99582e-05	down	1.27511	0.00506469	down	1.59526	6.21716e-07	down
0.23546	0.315548	insig	0.884721	0.00287285	insig	0.225979	0.481293	insig	0.627561	0.284945	insig	0.687204	0.385258	insig	0.040225	0.93868	insig	PB.1132	-0.0551189	0.962226	insig	-0.459852	0.239877	insig	0.651919	0.00279145	insig	-0.401267	0.508042	insig	-1.11684	0.00324838	down	-0.704951	0.0381325	insig	0.636875	2.17667e-05	insig	0.933317	2.68558e-05	insig	1.94155	4.81469e-07	down	0.179407	0.616271	insig
0.185503	0.495322	insig	0.619509	0.0973728	insig	0.0960942	0.818807	insig	0.413619	0.603537	insig	0.55348	0.642727	insig	0.118851	0.786129	insig	PB.1134	0.000344375	0.999534	insig	-0.408271	0.330572	insig	0.53337	0.00409887	insig	-0.405289	0.531842	insig	-0.946663	0.0108166	insig	-0.529647	0.147222	insig	0.483198	0.020632	insig	0.673697	0.00692351	insig	1.47103	0.000295202	down	0.0132889	0.972003	insig
1.02146	0.120175	insig	2.23134	0.00359942	up	1.59561	0.00657251	up	1.18877	0.484013	insig	0.661087	0.798452	insig	-0.544736	0.456063	insig	PB.1135	0.266554	0.922398	insig	-1.00062	0.0697057	insig	-0.289599	0.716244	insig	-1.25975	0.00279295	down	-0.714796	0.139251	insig	0.556412	0.360983	insig	-2.07071	8.63317e-05	up	-1.3117	0.0143717	up	1.11606	0.0624684	insig	-0.217874	0.701277	insig
-0.664271	0.128027	insig	-0.690864	0.445603	insig	-0.0561133	0.921561	insig	-0.0465781	0.992692	insig	-0.607814	0.864503	insig	-0.583304	0.197267	insig	PB.1136	0.217755	0.96664	insig	0.349687	0.605183	insig	-1.66097	0.00341646	down	0.140064	0.931134	insig	2.00449	6.38452e-07	up	1.87488	0.0582562	insig	2.4365	1.60559e-09	down	1.55659	0.0207949	down	1.35513	0.0590557	insig	4.00853	2.81025e-34	down
-1.07406	0.0114675	down	-1.10019	0.202473	insig	-1.33681	0.00127843	down	-0.0452557	0.993728	insig	0.265106	0.977301	insig	0.284994	0.718051	insig	PB.1137	1.58523	0.0457917	up	0.118725	0.875305	insig	-0.883482	0.13951	insig	-1.46124	0.00099104	down	0.995965	5.43112e-05	insig	2.46904	3.64403e-08	up	2.41752	2.57122e-10	down	-0.237666	0.713637	insig	1.16234	0.127171	insig	1.9346	4.27894e-05	down
1.81189	0.596466	insig	2.0751	0.652092	insig	2.70979	0.362491	insig	0.238499	0.99015	insig	-0.601389	0.985511	insig	-0.855463	0.807016	insig	PB.1140	-0.397465	0.924208	insig	0.924045	0.010347	insig	-0.417927	0.43348	insig	1.32396	0.175375	insig	1.33741	4.91793e-05	up	0.0283491	0.988142	insig	-6.3863	2.40108e-12	up	-4.19767	0.0026798	up	-5.29829	1.08885e-08	up	-3.31942	0.0139705	up
-0.355552	0.446224	insig	-0.123741	0.873431	insig	1.09856	0.0196949	up	0.212276	0.909995	insig	-1.19238	0.220469	insig	-1.42577	0.000686269	down	PB.1141	-0.868172	0.586607	insig	0.0380089	0.960627	insig	-0.580442	0.247234	insig	0.916667	0.306523	insig	0.614231	0.11332	insig	-0.291766	0.808864	insig	-2.14898	1.18274e-08	up	-1.63198	0.00709802	up	-2.35313	1.50918e-08	up	-0.503303	0.281583	insig
-0.705891	0.00534646	insig	-0.201566	0.709729	insig	-0.142377	0.6528	insig	0.484694	0.677928	insig	-0.0305966	0.993405	insig	-0.53686	0.0458594	insig	PB.1142	0.193601	0.861381	insig	0.290588	0.289529	insig	-0.081696	0.821612	insig	0.10281	0.813895	insig	0.367709	0.06281	insig	0.277959	0.529032	insig	1.21357	1.12778e-08	down	0.319717	0.284025	insig	0.681282	0.0738348	insig	1.1206	7.66878e-07	down
-1.74558	0.00848392	down	-0.661317	0.615693	insig	0.211677	0.789366	insig	1.05955	0.729505	insig	-0.845714	0.822769	insig	-1.92307	3.83154e-05	down	PB.1143	0.687982	0.811237	insig	1.58467	0.000907568	up	1.65105	0.000147934	up	0.899526	0.440948	insig	-0.0708915	0.910192	insig	-0.954756	0.413424	insig	1.45443	0.0111212	down	-0.972489	0.275982	insig	-0.838262	0.383121	insig	-0.0215779	0.958777	insig
-0.743262	0.011141	insig	-0.677062	0.430436	insig	-0.468836	0.117605	insig	0.0461844	0.992692	insig	-0.184235	0.98483	insig	-0.251589	0.585476	insig	PB.1144	-0.900024	0.0850421	insig	-1.99157	5.64772e-05	down	-0.244965	0.60816	insig	-1.08451	0.151275	insig	-1.75079	0.001107	down	-0.654111	0.061705	insig	0.152813	0.61816	insig	0.316401	0.401973	insig	1.42896	0.0799826	insig	-0.0986739	0.784408	insig
-0.536564	0.409363	insig	-0.0654971	0.968595	insig	-0.29055	0.701533	insig	0.451184	0.909995	insig	0.256597	0.983195	insig	-0.215935	0.735956	insig	PB.1145	-0.938058	0.754612	insig	0.217671	0.873059	insig	0.217744	0.865862	insig	1.1595	0.378109	insig	-0.00501292	0.996485	insig	-1.1503	0.419878	insig	2.1389	0.000872459	down	2.54035	2.28418e-05	down	1.81664	0.0568518	insig	1.59141	0.000642884	down
0.281343	0.200218	insig	0.783218	0.00812844	insig	0.360093	0.231315	insig	0.481347	0.38833	insig	0.453389	0.701779	insig	-0.0490671	0.915203	insig	PB.1146	0.0648395	0.969508	insig	-0.508802	0.107108	insig	0.386521	0.13	insig	-0.569772	0.188617	insig	-0.900344	0.00312762	insig	-0.319018	0.452587	insig	0.424219	0.0251671	insig	0.64587	0.00470586	insig	1.67566	1.76812e-07	down	0.36503	0.253064	insig
-0.177643	0.656345	insig	0.188841	0.822126	insig	0.801707	0.0273848	insig	0.346452	0.880933	insig	-0.582674	0.785349	insig	-0.95033	6.52698e-05	insig	PB.1148	0.579565	0.136576	insig	0.310991	0.305734	insig	-0.137696	0.670606	insig	-0.262688	0.516305	insig	0.443724	0.0653387	insig	0.718683	0.0182769	insig	1.17865	6.51761e-05	down	0.425706	0.0796876	insig	1.01732	0.0555246	insig	2.08334	7.35162e-18	down
0.384069	0.363609	insig	1.32519	0.054787	insig	1.44133	6.52419e-06	up	0.922055	0.619145	insig	-0.0913264	0.993405	insig	-1.0359	0.00875665	down	PB.1150	-0.311063	0.643092	insig	0.151399	0.762834	insig	0.280341	0.323538	insig	0.467691	0.399377	insig	-0.134214	0.763786	insig	-0.588603	0.0876095	insig	0.0890646	0.771921	insig	0.788532	0.0498425	insig	1.22246	0.0559241	insig	1.22038	4.38686e-05	down
-1.03145	0.00283804	down	-0.861418	0.108956	insig	-0.60012	0.136926	insig	0.148523	0.944842	insig	-0.233998	0.955822	insig	-0.404532	0.334735	insig	PB.1151	-0.472248	0.454899	insig	-0.0844432	0.839174	insig	-0.216815	0.53533	insig	0.394222	0.281802	insig	0.127458	0.617097	insig	-0.25413	0.587048	insig	1.03214	0.000554498	down	0.479786	0.153318	insig	0.215743	0.649774	insig	0.620405	0.0690181	insig
-0.547816	0.00291686	insig	-0.915701	0.0162548	insig	-0.567265	0.0121296	insig	-0.387809	0.729505	insig	-0.318641	0.884317	insig	0.0460446	0.903809	insig	PB.1152	-0.0406244	0.975798	insig	0.258919	0.223911	insig	-0.314466	0.136031	insig	0.305149	0.216558	insig	0.568368	0.000969682	insig	0.276582	0.393723	insig	-0.13351	0.445641	insig	-0.634846	0.000605248	insig	-1.3464	6.54663e-05	up	-0.416063	0.106521	insig
-1.05047	0.00144437	down	-1.16443	0.00806554	down	-0.645253	0.0389759	insig	-0.132662	0.957015	insig	-0.489967	0.797457	insig	-0.382352	0.439275	insig	PB.1153	0.104295	0.976009	insig	0.187717	0.782327	insig	-0.746654	0.211388	insig	0.087185	0.854483	insig	0.928003	2.60422e-05	insig	0.853898	0.0139491	insig	1.58544	1.51974e-05	down	0.434331	0.289737	insig	0.19449	0.693875	insig	1.65634	2.45228e-07	down
1.72834	0.000690954	up	2.16179	0.00886835	up	1.75531	0.00342058	up	0.410577	0.908948	insig	0.437218	0.954717	insig	0.00865308	0.993303	insig	PB.1154	-0.276347	0.931913	insig	0.207754	0.717135	insig	0.898753	0.00938547	insig	0.486451	0.623859	insig	-0.695724	0.0610311	insig	-1.16872	0.127863	insig	-2.23	9.0622e-10	up	-0.219119	0.778463	insig	-0.318781	0.71106	insig	-1.40804	0.0177295	up
0.750214	0.0780196	insig	0.46597	0.702531	insig	-0.608449	0.474993	insig	-0.304671	0.942777	insig	1.11015	0.787098	insig	1.39554	0.0620473	insig	PB.1155	-0.143764	0.979758	insig	-0.422915	0.68867	insig	-0.753456	0.546164	insig	-0.27862	0.487548	insig	0.322915	0.643935	insig	0.61123	0.543945	insig	1.6877	0.0087015	down	2.58333	1.8531e-22	down	2.54246	0.0014341	down	1.79819	0.0511355	insig
0.543697	0.282009	insig	1.05346	0.0518923	insig	0.528299	0.235069	insig	0.488063	0.800429	insig	0.553723	0.776108	insig	0.0456979	0.957296	insig	PB.1156	-0.150385	0.928078	insig	-0.0796726	0.890213	insig	-0.0222197	0.958498	insig	0.0756233	0.931904	insig	-0.0624185	0.899568	insig	-0.126467	0.865059	insig	-1.86876	1.12156e-11	up	-1.17048	0.0125813	up	-0.777469	0.100216	insig	-1.35016	3.5055e-05	up
0.616411	0.0591224	insig	0.548761	0.281102	insig	-0.0778572	0.852971	insig	-0.0889505	0.971393	insig	0.65859	0.603027	insig	0.726343	0.0372514	insig	PB.1157	-0.0742008	0.960905	insig	0.187917	0.511296	insig	0.134986	0.6524	insig	0.267163	0.472549	insig	0.0482005	0.869433	insig	-0.205839	0.660403	insig	-1.25733	1.44716e-08	up	-0.55998	0.0959896	insig	-0.934269	0.0153888	insig	-1.50142	4.67156e-09	up
0.168075	0.855397	insig	-0.65931	0.577462	insig	-0.27617	0.757005	insig	-0.849744	0.736068	insig	-0.348815	0.955822	insig	0.477703	0.498334	insig	PB.1158	0.00173456	0.999287	insig	-0.108588	0.887812	insig	-0.522106	0.244966	insig	-0.105441	0.926225	insig	0.408077	0.519748	insig	0.526956	0.372088	insig	-0.898073	0.121852	insig	-0.719257	0.211966	insig	-1.47956	0.0423706	up	-0.678188	0.12076	insig
0.0433751	0.94537	insig	1.47525	0.042236	up	0.873246	0.0974717	insig	1.41028	0.27518	insig	0.630993	0.850665	insig	-0.798411	0.140955	insig	PB.1159	0.327815	0.546036	insig	0.866022	1.66893e-05	insig	0.749312	0.00362296	insig	0.543891	0.0579914	insig	0.111762	0.722351	insig	-0.419859	0.382476	insig	-1.99231	9.15809e-12	up	-2.2697	1.05296e-11	up	-1.42579	0.0103786	up	-1.89953	2.01978e-05	up
-0.233138	0.62921	insig	0.258432	0.766933	insig	0.224142	0.683132	insig	0.46933	0.842286	insig	0.06096	0.993405	insig	-0.428653	0.417576	insig	PB.1160	0.394992	0.917811	insig	0.369212	0.623335	insig	1.29537	0.0436709	up	-0.024827	0.986365	insig	-0.9324	0.00231472	insig	-0.893642	0.314072	insig	0.855265	0.0833563	insig	0.231467	0.734647	insig	0.700782	0.237994	insig	-0.247142	0.599439	insig
-0.431605	0.119219	insig	-0.373836	0.564696	insig	-0.306593	0.163552	insig	0.0383011	0.991633	insig	-0.0395892	0.993405	insig	-0.10018	0.805591	insig	PB.1164	-0.270669	0.890697	insig	0.0409983	0.960786	insig	0.0888042	0.885106	insig	0.320751	0.676652	insig	-0.0516451	0.927969	insig	-0.358776	0.294399	insig	1.89001	3.77037e-10	down	1.73537	3.96206e-10	down	1.43459	0.0135853	down	1.46396	3.2973e-18	down
0.775451	0.0283678	insig	0.904433	0.278457	insig	0.5336	0.16942	insig	0.106308	0.978581	insig	0.398923	0.94289	insig	0.271346	0.53797	insig	PB.1165	0.415157	0.77979	insig	0.257038	0.646726	insig	1.15437	0.00550079	up	-0.156166	0.800377	insig	-0.903424	0.00109842	insig	-0.73467	0.0307397	insig	-1.29059	0.000326028	up	-0.923721	0.00370716	insig	-0.684184	0.349925	insig	-1.94003	2.12785e-13	up
-0.235406	0.442974	insig	-0.407899	0.286846	insig	-0.00818665	0.986619	insig	-0.19194	0.852412	insig	-0.370322	0.82095	insig	-0.200312	0.64416	insig	PB.1167	0.172709	0.89323	insig	-0.47532	0.123336	insig	-0.675351	0.0149737	insig	-0.643079	0.068766	insig	0.194784	0.564696	insig	0.85038	0.015944	insig	0.86503	0.00035305	insig	0.461764	0.0855023	insig	0.89274	0.0020096	insig	1.4986	7.04166e-06	down
0.613264	0.0157381	insig	1.43202	0.000333035	up	0.90372	0.00792907	insig	0.79792	0.299817	insig	0.556392	0.734879	insig	-0.261176	0.556806	insig	PB.1168	-0.246558	0.826791	insig	-0.260106	0.451421	insig	1.03998	6.23396e-05	up	-0.0093129	0.990789	insig	-1.30473	2.26408e-06	down	-1.28354	0.00050714	down	0.0561397	0.829148	insig	0.921219	0.00126739	insig	1.70586	2.7463e-06	down	-0.113016	0.797338	insig
-0.39781	0.0807976	insig	-1.08451	0.00898308	down	-0.864436	0.0223655	insig	-0.706633	0.426846	insig	-0.19008	0.974346	insig	0.492227	0.287151	insig	PB.1169	0.0465387	0.980883	insig	-0.799178	0.100873	insig	-0.188027	0.612263	insig	-0.842268	0.211203	insig	-0.616582	0.244832	insig	0.236825	0.660403	insig	0.671535	0.00137814	insig	0.232838	0.427059	insig	0.350059	0.581338	insig	-0.0327199	0.952173	insig
0.380241	0.372337	insig	-0.268992	0.732306	insig	0.22573	0.660123	insig	-0.67007	0.615367	insig	-0.462576	0.860957	insig	0.183322	0.689325	insig	PB.1170	-0.193929	0.922398	insig	-0.0773727	0.887213	insig	-0.0679682	0.902064	insig	0.121044	0.792285	insig	-0.015028	0.961254	insig	-0.123128	0.835187	insig	-1.71873	5.72437e-07	up	-1.13793	0.000104504	up	-1.94799	2.25547e-06	up	-1.4536	4.69118e-07	up
-0.810081	0.011199	insig	-1.21067	0.0607754	insig	-0.929687	0.0590358	insig	-0.419829	0.871823	insig	-0.250271	0.975627	insig	0.143976	0.862543	insig	PB.1171	-0.00796072	0.998514	insig	-0.0595649	0.872761	insig	-0.226225	0.514054	insig	-0.044578	0.953985	insig	0.161909	0.619762	insig	0.218244	0.781313	insig	1.10321	1.28564e-06	down	0.306954	0.492999	insig	-0.0848162	0.908941	insig	0.373819	0.553829	insig
0.107787	0.800999	insig	-0.0475837	0.953828	insig	-0.797695	0.0022238	insig	-0.177181	0.948427	insig	0.78195	0.603027	insig	0.937558	0.00970592	insig	PB.1174	-0.242199	0.810495	insig	-0.259901	0.428763	insig	0.0923222	0.814003	insig	-0.0123821	0.979601	insig	-0.357174	0.0658154	insig	-0.332374	0.234686	insig	-0.891966	0.000246249	insig	-0.537287	0.134744	insig	-0.721278	0.15779	insig	-1.81355	1.10287e-16	up
0.845177	0.0038368	insig	1.49233	0.0679449	insig	0.995563	0.00210877	insig	0.624857	0.830137	insig	0.525435	0.914689	insig	-0.119184	0.820782	insig	PB.1175	0.366405	0.514855	insig	0.739441	0.0109492	insig	1.26492	5.28466e-09	up	0.378543	0.478363	insig	-0.530363	0.116731	insig	-0.89573	0.0155447	insig	-1.29426	1.75089e-09	up	-0.808918	0.00712911	insig	-0.587151	0.476887	insig	-1.59468	7.27333e-07	up
-0.130856	0.794803	insig	-0.522716	0.36811	insig	-0.374984	0.335207	insig	-0.414481	0.812112	insig	-0.11918	0.984675	insig	0.273685	0.564486	insig	PB.1176	-0.239221	0.828073	insig	-0.0265271	0.960627	insig	-0.426638	0.211579	insig	0.217488	0.701761	insig	0.395272	0.253594	insig	0.19087	0.776591	insig	-0.636549	0.0328406	insig	-0.519355	0.209536	insig	-1.1725	0.00328834	up	-0.613149	0.0296899	insig
-2.21167	9.03819e-07	down	-3.00393	0.000846583	down	-2.87695	3.79492e-05	down	-0.810929	0.80632	insig	-0.10099	0.993405	insig	0.684705	0.496065	insig	PB.1177	-1.60904	0.7753	insig	-5.76138	1.16697e-09	down	-3.43718	0.00290815	down	-4.13906	0.108247	insig	-2.32828	0.0701825	insig	1.81623	0.637462	insig	-1.31934	0.000429097	up	-1.91948	0.288198	insig	1.39818	0.260872	insig	-0.779895	0.53335	insig
0.101353	0.776402	insig	0.315917	0.596775	insig	-0.0652742	0.876237	insig	0.194723	0.923741	insig	0.412047	0.848379	insig	0.195595	0.574533	insig	PB.1179	0.633214	0.330775	insig	-0.234686	0.590701	insig	0.13666	0.800369	insig	-0.860958	2.06952e-05	insig	-0.375643	0.119851	insig	0.497707	0.183795	insig	0.58481	0.0581979	insig	0.058531	0.844614	insig	1.09638	0.00752306	down	0.352012	0.235627	insig
-0.262903	0.479908	insig	-0.997912	0.0425463	insig	-1.18912	0.00134525	down	-0.754599	0.337583	insig	0.222379	0.955822	insig	0.952732	0.00323018	insig	PB.1180	-0.285028	0.670058	insig	-0.694421	0.00628831	insig	-0.0940502	0.759311	insig	-0.404503	0.366531	insig	-0.605474	0.0329189	insig	-0.188887	0.744263	insig	0.518981	0.0684627	insig	0.546181	0.0654981	insig	0.177397	0.707715	insig	-0.605825	0.0906503	insig
0.0799963	0.830082	insig	-0.351925	0.739565	insig	-1.08317	0.0055613	down	-0.452278	0.899772	insig	0.766115	0.846011	insig	1.19237	0.0090555	up	PB.1181	-0.166807	0.781832	insig	0.245304	0.167718	insig	-0.293588	0.184511	insig	0.417405	0.0248856	insig	0.533836	0.00312762	insig	0.129832	0.765864	insig	-0.806582	3.61595e-07	insig	-0.553277	0.0835634	insig	-1.44194	0.0571099	insig	-1.62294	0.000327359	up
0.581141	0.05216	insig	0.970661	0.0257048	insig	0.250306	0.475179	insig	0.368071	0.814063	insig	0.751538	0.477265	insig	0.363106	0.361418	insig	PB.1182	-0.525405	0.672658	insig	0.0462539	0.945404	insig	-0.268709	0.650453	insig	0.578277	0.0299432	insig	0.311065	0.0908137	insig	-0.254276	0.561681	insig	-1.26891	0.000206818	up	-0.155916	0.671639	insig	-0.387336	0.326785	insig	-0.782323	0.00519468	insig
0.503591	0.194308	insig	1.0982	0.00599508	up	1.18797	0.00116191	up	0.574814	0.472808	insig	-0.0611309	0.993405	insig	-0.65708	0.095145	insig	PB.1184	0.197585	0.962226	insig	-0.0323425	0.968805	insig	0.202658	0.799434	insig	-0.224649	0.857394	insig	-0.23927	0.676362	insig	-0.000634662	0.999483	insig	0.757328	0.0556865	insig	1.06852	0.0589724	insig	1.84605	4.17267e-09	down	1.7111	2.58364e-05	down
0.114957	0.764315	insig	-0.331316	0.486452	insig	-0.447966	0.279012	insig	-0.466616	0.652766	insig	0.146473	0.980857	insig	0.589479	0.167951	insig	PB.1185	-0.296412	0.691878	insig	-0.341331	0.36925	insig	-0.112223	0.732871	insig	-0.0403875	0.959733	insig	-0.23422	0.548449	insig	-0.182156	0.761488	insig	-1.07506	7.91298e-07	up	-0.657686	0.0433229	insig	-1.10434	0.00389979	up	-1.43926	0.000140892	up
1.21122	0.162672	insig	4.16461	0.0103094	up	2.94297	0.000493195	up	2.92447	0.388132	insig	1.24292	0.884317	insig	-1.69732	0.0564924	insig	PB.1187	1.26781	0.51645	insig	2.33252	8.15135e-22	up	2.60122	1.56964e-21	up	1.0647	0.390838	insig	-0.274116	0.34964	insig	-1.32247	0.547983	insig	-3.27574	7.787e-11	up	-3.32611	0.000140362	up	-1.49573	0.32325	insig	-2.96913	7.43555e-05	up
-0.590959	0.0219451	insig	-0.0888948	0.918899	insig	-0.121461	0.619667	insig	0.480189	0.837748	insig	0.0589389	0.993405	insig	-0.440882	0.13279	insig	PB.1188	-0.137288	0.864166	insig	-0.625831	0.00105529	insig	-0.301766	0.114142	insig	-0.482932	0.0568041	insig	-0.3291	0.0981801	insig	0.167152	0.649829	insig	0.651218	8.45771e-05	insig	0.203456	0.525864	insig	1.14861	0.0447935	down	0.800419	4.37678e-06	insig
-0.261892	0.663699	insig	-0.304922	0.692626	insig	-0.468549	0.380233	insig	-0.066216	0.983947	insig	0.19144	0.971555	insig	0.237958	0.710311	insig	PB.1189	-1.19565	0.0407842	down	-0.603492	0.280195	insig	-0.426816	0.40385	insig	0.596047	0.487567	insig	-0.182387	0.774805	insig	-0.764719	0.308862	insig	-0.383111	0.378346	insig	0.558844	0.316546	insig	-0.123504	0.852579	insig	-0.453657	0.248272	insig
0.0182296	0.961151	insig	0.324977	0.688029	insig	0.262059	0.367598	insig	0.286937	0.917683	insig	0.0935436	0.993405	insig	-0.215616	0.479988	insig	PB.1190	0.187034	0.831644	insig	0.0246427	0.967633	insig	-0.396035	0.241654	insig	-0.155607	0.836351	insig	0.41605	0.359135	insig	0.584667	0.274346	insig	1.51063	8.75971e-13	down	1.3473	9.72569e-08	down	1.77271	0.00313918	down	2.13756	1.68897e-16	down
0.820971	0.0288895	insig	1.59962	0.186951	insig	2.0061	2.41325e-09	up	0.760474	0.868747	insig	-0.375132	0.974346	insig	-1.16053	0.00266083	down	PB.1191	0.283081	0.861012	insig	1.10618	3.13228e-09	up	0.528008	0.176626	insig	0.826477	0.0787329	insig	0.572917	0.0888508	insig	-0.237763	0.783993	insig	-1.91331	5.41507e-14	up	-1.36989	0.00153778	up	-1.46486	0.170166	insig	-0.470109	0.301189	insig
-0.368219	0.785395	insig	-1.46962	0.521832	insig	1.16999	0.250525	insig	-1.11699	0.876784	insig	-2.60657	0.451718	insig	-1.51707	0.0761813	insig	PB.1193	1.08024	0.0125321	up	-0.813776	0.112677	insig	-2.52879	1.6454e-22	down	-1.88549	0.00131929	down	1.71004	0.000784482	up	3.61007	6.27326e-25	up	-7.77209	1.19843e-69	up	-9.22002	6.51199e-112	up	-8.47038	1.9517e-19	up	-4.10747	1.81611e-15	up
-0.8599	0.0387047	insig	-1.74525	0.000317428	down	-1.25418	0.0224365	down	-0.905896	0.269702	insig	-0.461367	0.888107	insig	0.418223	0.552737	insig	PB.1195	-1.29056	1.84837e-05	down	-0.338541	0.201824	insig	-1.27343	1.37399e-08	down	0.957134	0.000941117	insig	0.930286	8.58563e-06	insig	-0.0129611	0.9844	insig	0.305585	0.3886	insig	0.745849	0.0463645	insig	-1.13855	0.00011952	up	0.301055	0.640529	insig
0.448933	0.247303	insig	0.612777	0.707574	insig	0.104206	0.772449	insig	0.141824	0.987831	insig	0.541306	0.96109	insig	0.376752	0.421211	insig	PB.1197	-0.429875	0.493572	insig	-0.0036397	0.993986	insig	-0.294789	0.334667	insig	0.431225	0.156631	insig	0.286596	0.129944	insig	-0.131388	0.806226	insig	-2.97229	3.45342e-42	up	-2.08651	3.6156e-09	up	-2.39901	0.0354255	up	-2.60268	6.0708e-37	up
0.342172	0.489455	insig	-0.0222347	0.979397	insig	0.0478687	0.944394	insig	-0.384505	0.729505	insig	-0.040873	0.993405	insig	0.321352	0.49678	insig	PB.1198	0.196516	0.880193	insig	0.407946	0.165955	insig	0.0584351	0.892113	insig	0.21754	0.56831	insig	0.344926	0.13061	insig	0.140336	0.815992	insig	-1.00401	0.00690077	up	-0.852001	0.00806705	insig	-1.47427	4.32919e-08	up	-1.04531	0.00260339	up
0.895571	0.121195	insig	1.44027	2.06378e-05	up	0.0543745	0.903239	insig	0.529379	0.848144	insig	1.417	0.000711025	up	0.860574	0.232759	insig	PB.1203	0.303034	0.30777	insig	0.249959	0.213056	insig	0.182977	0.332094	insig	-0.0479641	0.904052	insig	0.0619474	0.79387	insig	0.122107	0.756674	insig	-0.448111	0.0427739	insig	0.147398	0.849656	insig	0.700124	0.00846955	insig	-0.609098	0.0459805	insig
-0.621695	0.164306	insig	0.762459	0.272319	insig	1.05314	0.0102749	up	1.36265	0.0762535	insig	-0.260991	0.943693	insig	-1.64355	4.2213e-12	down	PB.1205	0.0902279	0.95302	insig	0.397273	0.218341	insig	-0.047289	0.909353	insig	0.312949	0.53072	insig	0.439561	0.180742	insig	0.140445	0.839213	insig	0.910028	0.0151545	insig	0.202829	0.588574	insig	1.23535	0.00812934	down	1.97712	8.4727e-22	down
-1.31431	0.00171982	down	0.000174957	0.999899	insig	0.271508	0.597843	insig	1.29258	0.48846	insig	-0.240805	0.978392	insig	-1.55508	1.37939e-07	down	PB.1206	1.00469	0.380872	insig	0.538784	0.424703	insig	1.57575	0.00217778	up	-0.464199	0.600007	insig	-1.04267	0.0137262	down	-0.5643	0.437733	insig	1.28322	0.0048217	down	-1.02999	0.0270765	up	0.700693	0.41346	insig	-0.0525696	0.88386	insig
0.465211	0.334268	insig	1.40835	0.0747057	insig	1.34499	0.00146684	up	0.920137	0.65871	insig	0.0938125	0.993405	insig	-0.845322	0.0569652	insig	PB.1208	0.148219	0.947123	insig	0.767054	0.0313486	insig	1.03882	2.17757e-08	up	0.622635	0.375133	insig	-0.27688	0.519829	insig	-0.8855	0.0933737	insig	-1.19469	0.000246249	up	-0.871022	0.0654981	insig	-0.597263	0.428364	insig	-0.920938	0.00630011	insig
0.0738826	0.772862	insig	0.249755	0.464807	insig	-0.0614021	0.818518	insig	0.154807	0.876784	insig	0.340289	0.700033	insig	0.164161	0.453732	insig	PB.1211	-0.0864164	0.970002	insig	0.13066	0.792143	insig	-0.577271	0.116609	insig	0.22518	0.619564	insig	0.703795	0.00111487	insig	0.491166	0.143825	insig	-1.21007	4.0773e-06	up	-1.04342	2.72785e-06	up	-1.13305	2.74573e-05	up	-0.72476	3.6031e-06	insig
-0.565341	0.0588928	insig	-1.20578	0.0563474	insig	-0.396258	0.209459	insig	-0.658498	0.729505	insig	-0.77537	0.702523	insig	-0.143587	0.766589	insig	PB.1213	-0.115787	0.939676	insig	-0.476932	0.0758964	insig	-0.956765	0.000331761	insig	-0.356423	0.298397	insig	0.47479	0.0555029	insig	0.845191	0.00771895	insig	-1.61811	4.64372e-13	up	-2.06181	2.7781e-13	up	-2.38366	6.66649e-06	up	-1.08842	0.000367465	up
0.797912	0.710799	insig	2.62724	0.232713	insig	3.3557	0.0280214	up	1.81436	0.666346	insig	-0.693506	0.962032	insig	-2.52957	0.0594786	insig	PB.1214	0.727963	0.891153	insig	1.37111	0.376724	insig	1.06945	0.442364	insig	0.651531	0.781728	insig	0.297681	0.852972	insig	-0.334966	0.865429	insig	-2.01064	0.163632	insig	-1.9364	0.0928397	insig	-0.801774	0.630616	insig	0.232565	0.874279	insig
-1.18958	0.00516317	down	-1.87933	0.000894118	down	-0.17157	0.738225	insig	-0.707149	0.729505	insig	-1.67474	0.0508307	insig	-0.995923	0.0604273	insig	PB.1215	0.285963	0.788744	insig	-0.14173	0.726849	insig	-0.844404	0.0240836	insig	-0.423323	0.160596	insig	0.697133	0.0211016	insig	1.13515	0.0027601	up	1.3444	2.18403e-06	down	-0.126313	0.82219	insig	-0.430646	0.458733	insig	1.98611	4.77295e-06	down
-1.52256	0.0104752	down	-0.513948	0.623126	insig	-0.537502	0.442367	insig	0.99007	0.48846	insig	0.0560025	0.993405	insig	-0.95949	0.0040923	insig	PB.1216	-0.52396	0.630487	insig	-0.110131	0.826237	insig	-1.0036	0.00811761	down	0.418527	0.535423	insig	0.888539	0.0139258	insig	0.485397	0.552106	insig	0.11849	0.843736	insig	-0.870222	0.0680209	insig	-0.31954	0.624503	insig	0.556018	0.110237	insig
0.703326	0.0231501	insig	2.00338	0.098759	insig	1.20799	0.00010449	up	1.27681	0.71796	insig	0.822882	0.902029	insig	-0.474611	0.191135	insig	PB.1218	-1.029	5.89954e-06	down	-0.97373	0.020563	insig	-0.462508	0.033426	insig	0.0589113	0.955699	insig	-0.516251	0.296573	insig	-0.564279	0.0806742	insig	-2.07637	1.00869e-20	up	-0.336504	0.273169	insig	0.855856	0.492359	insig	-0.435889	0.156349	insig
0.459921	0.150003	insig	0.507302	0.403227	insig	0.0533592	0.891466	insig	0.0256452	0.993728	insig	0.48533	0.826992	insig	0.438469	0.240482	insig	PB.1220	-0.0444935	0.973827	insig	-0.526879	0.0119459	insig	-0.275991	0.327227	insig	-0.477135	0.0988606	insig	-0.255865	0.370644	insig	0.234065	0.61415	insig	-1.85472	2.18768e-22	up	-1.34402	6.59335e-06	up	-0.860642	0.0700701	insig	-1.55683	8.21457e-09	up
0.51428	0.1602	insig	-0.0900044	0.893168	insig	1.18705	0.000361482	up	-0.623205	0.440354	insig	-1.24771	0.00158582	down	-0.648147	0.00996043	insig	PB.1221	0.16566	0.917148	insig	0.108176	0.837085	insig	-0.945518	1.47205e-06	insig	-0.0499702	0.958382	insig	1.04868	0.003209	up	1.11201	0.00285466	up	-0.694949	0.0185959	insig	-0.341876	0.344713	insig	-0.93568	0.0264885	insig	1.40727	8.45064e-12	down
-0.271595	0.286159	insig	-0.210053	0.735958	insig	-0.541819	0.158003	insig	0.0405387	0.989455	insig	0.359932	0.913718	insig	0.297277	0.500854	insig	PB.1222	-0.501786	0.274748	insig	-0.765712	0.00336907	insig	-0.161835	0.568353	insig	-0.258233	0.606863	insig	-0.608704	0.023255	insig	-0.339424	0.410939	insig	0.779514	0.000385961	insig	1.01513	5.02673e-06	down	1.29612	0.00272979	down	0.370859	0.38093	insig
-1.4915	0.00427603	down	-0.732011	0.282358	insig	-0.0602798	0.93642	insig	0.740995	0.726836	insig	-0.642191	0.843207	insig	-1.40522	0.0299746	down	PB.1223	-0.091374	0.996257	insig	-3.8884	NA	insig	-1.11345	0.688316	insig	-3.78499	0.0831819	insig	-2.779	0.0944271	insig	1.01096	0.765009	insig	0.958545	NA	insig	-0.431997	0.799908	insig	4.08118	3.21097e-06	down	1.98488	0.05989	insig
-0.912697	0.00446708	insig	-0.660868	0.294569	insig	-0.476748	0.16962	insig	0.230895	0.928152	insig	-0.155898	0.983023	insig	-0.408808	0.306728	insig	PB.1224	0.115401	0.944944	insig	0.353411	0.326145	insig	0.528366	0.0705932	insig	0.241614	0.650522	insig	-0.180175	0.609403	insig	-0.408945	0.338726	insig	1.733	6.17441e-12	down	0.711458	0.0341655	insig	0.681143	0.215956	insig	0.697319	0.024259	insig
-1.07968	0.00062185	down	-1.48127	0.000339908	down	-1.07942	0.000153004	down	-0.420915	0.802142	insig	-0.371816	0.869167	insig	0.0244361	0.969498	insig	PB.1225	0.20631	0.881402	insig	-0.336514	0.377205	insig	0.0759591	0.866609	insig	-0.536043	0.173089	insig	-0.417163	0.161246	insig	0.131812	0.829347	insig	3.50919	1.676e-52	down	2.22951	1.23062e-11	down	2.32513	4.66634e-10	down	2.32438	7.69382e-16	down
-1.04306	0.00113799	down	-0.213832	0.865959	insig	-1.17806	0.002467	down	0.809259	0.797827	insig	0.989508	0.773268	insig	0.158908	0.792024	insig	PB.1226	0.834789	0.278779	insig	0.0276289	0.967449	insig	0.192121	0.752213	insig	-0.801201	0.0210672	insig	-0.170258	0.559882	insig	0.642958	0.186842	insig	5.10819	1.63299e-60	down	3.23294	2.11433e-26	down	4.82731	2.78989e-10	down	3.70704	1.53859e-21	down
-1.20487	4.91253e-06	down	-0.834618	0.226016	insig	-0.775847	0.0314098	insig	0.350101	0.899633	insig	-0.0271955	0.99657	insig	-0.399461	0.36876	insig	PB.1228	-0.256389	0.702685	insig	0.164614	0.557049	insig	-0.337667	0.189655	insig	0.426979	0.156411	insig	0.497504	0.0251937	insig	0.0831236	0.897576	insig	1.00276	2.36853e-06	down	0.0605272	0.872284	insig	-0.0335328	0.964508	insig	0.532862	0.186266	insig
0.482527	0.131489	insig	2.04505	0.0368084	up	1.72802	2.67074e-10	up	1.53898	0.488712	insig	0.34051	0.973225	insig	-1.21501	1.46346e-06	down	PB.1230	-0.713328	0.340197	insig	0.164033	0.80365	insig	0.329066	0.521318	insig	0.881776	0.0566331	insig	-0.170804	0.711027	insig	-1.03959	0.00017837	down	-0.212612	0.564139	insig	0.989094	0.000180538	insig	1.62999	0.0799259	insig	1.15532	4.26682e-07	down
0.249312	0.806261	insig	1.7921	0.0489361	up	2.67654	4.47429e-06	up	1.51573	0.561044	insig	-0.856271	0.829076	insig	-2.38564	0.00409668	down	PB.1232	0.765785	0.817924	insig	1.50444	0.0120381	up	1.54619	0.00875472	up	0.739451	0.599342	insig	-0.0466092	0.948166	insig	-0.770817	0.581153	insig	-0.363441	0.534835	insig	-0.871099	0.449705	insig	-0.118629	0.907823	insig	0.734012	0.30541	insig
-0.989204	0.0316438	insig	0.0175311	0.989139	insig	-0.344788	0.415576	insig	0.985903	0.680321	insig	0.387764	0.954754	insig	-0.618866	0.206602	insig	PB.1234	-0.283372	0.814443	insig	-0.113444	0.807005	insig	-0.792655	0.0453622	insig	0.176946	0.652685	insig	0.674877	0.0207154	insig	0.50999	0.327298	insig	-2.1155	1.80702e-12	up	-2.81303	3.51104e-13	up	-2.02319	0.00248343	up	-1.69579	1.38885e-07	up
0.371001	0.596102	insig	1.13695	0.173632	insig	0.599435	0.310077	insig	0.742135	0.783623	insig	0.566529	0.893304	insig	-0.192866	0.840935	insig	PB.1235	0.0554796	0.993734	insig	0.0677766	0.958755	insig	1.452	0.0670706	insig	0.015798	0.991803	insig	-1.39054	0.00681417	down	-1.39228	0.124477	insig	0.948081	0.126206	insig	1.26594	0.0799774	insig	1.97116	0.00318818	down	0.0592077	0.921971	insig
0.3619	0.456641	insig	2.1351	0.00127512	up	2.02248	4.77168e-06	up	1.74987	0.112405	insig	0.140372	0.991271	insig	-1.62604	0.00108977	down	PB.1236	1.15569	0.0133143	up	0.744452	0.0518419	insig	1.07959	0.00320496	up	-0.40437	0.547021	insig	-0.340082	0.451153	insig	0.075476	0.93498	insig	0.508461	0.146814	insig	-0.280718	0.595782	insig	1.85289	0.00177219	down	1.41732	0.00429032	down
-0.137979	0.740339	insig	-0.597315	0.478385	insig	-1.27784	0.000140144	down	-0.481032	0.871319	insig	0.714237	0.80717	insig	1.17163	0.00302148	up	PB.1237	-1.09605	0.470188	insig	0.0736117	0.94534	insig	-0.33879	0.82546	insig	1.1771	9.5663e-05	up	0.409232	0.0958908	insig	-0.753528	0.0900943	insig	-1.93296	0.000188045	up	-0.965428	0.00923791	insig	-2.64458	1.08693e-05	up	-2.89996	5.62863e-16	up
1.06008	0.000179519	up	1.31234	0.0357406	up	1.59341	4.59515e-08	up	0.229952	0.935235	insig	-0.251702	0.968817	insig	-0.501701	0.182148	insig	PB.1238	0.280063	0.867097	insig	1.03653	3.10799e-08	up	0.869724	1.26479e-07	insig	0.760799	0.146598	insig	0.161874	0.511576	insig	-0.58416	0.348689	insig	0.550994	0.0111631	insig	1.33817	0.000667826	down	0.783416	0.17828	insig	1.24348	2.11379e-05	down
0.261679	0.639725	insig	0.642213	0.370171	insig	2.04816	3.94472e-06	up	0.358151	0.84234	insig	-1.37764	0.0548373	insig	-1.75529	8.72291e-07	down	PB.1239	0.0862826	0.963696	insig	0.834838	0.051977	insig	-0.0850396	0.895174	insig	0.753121	0.247031	insig	0.91489	0.0952442	insig	0.175841	0.859255	insig	-0.476346	0.242441	insig	-0.292119	0.488647	insig	-0.705141	0.202449	insig	1.62386	0.000475537	down
-0.0793109	0.852839	insig	0.648108	0.294777	insig	0.700603	0.116617	insig	0.705593	0.608321	insig	-0.0250846	0.99657	insig	-0.74971	0.0999853	insig	PB.1241	0.0484154	0.980104	insig	0.329885	0.262505	insig	-0.116173	0.76717	insig	0.287288	0.334634	insig	0.441577	0.00537792	insig	0.167488	0.706361	insig	-1.59094	2.86445e-09	up	-1.71115	2.48371e-10	up	-1.31561	0.00278123	up	-0.805877	0.063929	insig
0.440592	0.471434	insig	0.991018	0.193052	insig	0.0926403	0.915305	insig	0.530446	0.82235	insig	0.925344	0.670002	insig	0.375922	0.64089	insig	PB.1242	0.611203	0.499321	insig	0.615424	0.12702	insig	1.02359	0.0108037	up	0.0100311	0.990034	insig	-0.41273	0.169115	insig	-0.409937	0.525642	insig	0.328648	0.514189	insig	0.16207	0.792592	insig	0.660961	0.222833	insig	-0.637282	0.282728	insig
0.944024	0.00398451	insig	0.930145	0.31553	insig	0.216212	0.678068	insig	-0.034679	0.993728	insig	0.749234	0.846011	insig	0.760996	0.0969788	insig	PB.1243	0.426939	0.696184	insig	0.22951	0.481995	insig	0.728632	0.000679882	insig	-0.194733	0.790708	insig	-0.504423	0.0365035	insig	-0.296177	0.654651	insig	-1.92157	1.14459e-16	up	-1.39769	0.000391758	up	-1.25917	0.0981154	insig	-2.4665	8.17522e-11	up
-0.536717	0.0366568	insig	-0.506268	0.582601	insig	-0.573127	0.0602668	insig	0.0100639	0.998481	insig	0.0938889	0.993405	insig	0.0625987	0.892134	insig	PB.1245	0.494274	0.411117	insig	0.305197	0.363268	insig	0.291065	0.420211	insig	-0.18344	0.600991	insig	0.00877274	0.974999	insig	0.205	0.586218	insig	1.85293	4.49448e-14	down	0.826045	0.00026743	insig	1.00283	0.167898	insig	0.957597	0.000783511	insig
0.448349	0.0866173	insig	0.47244	0.633674	insig	-0.509019	0.0568126	insig	0.00271485	0.999352	insig	1.01136	0.684373	insig	0.986088	1.99042e-05	insig	PB.1246	0.0699951	0.976032	insig	0.596099	0.0239647	insig	0.110592	0.783372	insig	0.5311	0.186049	insig	0.481059	0.00130861	insig	-0.0363633	0.96097	insig	-0.715027	0.00377863	insig	-0.328813	0.34297	insig	-0.881354	0.254043	insig	-1.36334	4.61182e-12	up
-1.35453	0.0146063	down	-3.60472	0.000293672	down	-2.78937	0.0354456	down	-2.26705	0.181612	insig	-0.777587	0.930183	insig	1.45526	0.160233	insig	PB.1247	-0.863202	0.902728	insig	-2.27436	0.107782	insig	-3.08906	0.0526342	insig	-1.41118	0.000725416	down	0.807701	0.0711935	insig	2.2309	3.33895e-07	up	1.79419	0.141374	insig	1.30565	0.00138272	down	0.431213	0.695184	insig	2.07003	0.0576085	insig
-0.0594471	0.860573	insig	0.757991	0.157799	insig	0.426183	0.152194	insig	0.796093	0.48267	insig	0.359707	0.908291	insig	-0.456653	0.164739	insig	PB.1248	-0.253274	0.70966	insig	0.0122457	0.974174	insig	0.161252	0.462395	insig	0.270682	0.512714	insig	-0.153975	0.537203	insig	-0.411212	0.287727	insig	-1.45779	1.20109e-17	up	-1.2582	3.09965e-06	up	-0.755792	0.10367	insig	-1.22476	2.77579e-06	up
2.27378	0.126539	insig	4.70749	0.00210548	up	4.86681	2.04669e-06	up	2.40934	0.405842	insig	-0.125368	0.993405	insig	-2.54718	0.01538	down	PB.1249	-0.134685	0.985217	insig	0.714948	0.290641	insig	1.57086	0.0198673	up	0.851527	0.557597	insig	-0.861158	0.104329	insig	-1.69814	0.196376	insig	-3.32052	0.00056693	up	-0.90504	0.524855	insig	0.625494	0.598494	insig	-0.0645629	0.951761	insig
0.758066	0.0230855	insig	1.35191	0.00287004	up	0.907256	0.00457891	insig	0.570672	0.677928	insig	0.472539	0.798452	insig	-0.116489	0.838303	insig	PB.1251	-0.1826	0.815318	insig	-0.6466	0.0015938	insig	0.281286	0.234005	insig	-0.458699	0.15598	insig	-0.932906	4.79413e-05	insig	-0.463126	0.213932	insig	-2.19033	5.16374e-27	up	-1.24291	0.000125517	up	-0.233343	0.616048	insig	-1.59482	6.94268e-08	up
0.469641	0.143688	insig	0.409876	0.470331	insig	0.412815	0.29063	insig	-0.0815977	0.973351	insig	0.0268754	0.994018	insig	0.088663	0.876011	insig	PB.1254	-0.290562	0.588077	insig	0.142606	0.624278	insig	-0.236049	0.340262	insig	0.43933	0.126787	insig	0.373771	0.0907436	insig	-0.0521777	0.919303	insig	-3.37975	1.507e-64	up	-2.61319	2.2275e-27	up	-3.15432	4.18228e-20	up	-2.76298	9.16691e-20	up
0.000823971	0.998863	insig	-0.447071	0.319732	insig	-0.511409	0.136838	insig	-0.469681	0.622444	insig	0.0934774	0.986111	insig	0.54132	0.111103	insig	PB.1255	-0.332414	0.464752	insig	-0.100335	0.6645	insig	-0.151529	0.445052	insig	0.237665	0.465278	insig	0.0461385	0.823408	insig	-0.179276	0.672954	insig	-0.626073	0.00380183	insig	-0.285806	0.329815	insig	-1.01079	0.00069563	up	-1.01409	0.000775917	up
-1.43702	0.00274712	down	-1.71391	0.0518923	insig	-1.68203	1.64667e-05	down	-0.297485	0.946348	insig	-0.00648886	0.998611	insig	0.268454	0.745535	insig	PB.1259	0.241813	0.922146	insig	-0.251017	0.612707	insig	-0.823461	0.144459	insig	-0.486669	0.416111	insig	0.566743	0.220917	insig	1.06412	0.149169	insig	3.37655	2.95846e-27	down	1.70215	0.00244279	down	1.87469	0.0168063	down	2.48941	3.28633e-07	down
-0.185687	0.464452	insig	-0.460998	0.321365	insig	-0.466915	0.322104	insig	-0.296045	0.842324	insig	0.0328371	0.99375	insig	0.305674	0.603857	insig	PB.1260	-0.0837297	0.987827	insig	-0.531469	0.530559	insig	-0.152847	0.869957	insig	-0.43467	0.765238	insig	-0.381862	0.644596	insig	0.0625413	0.967074	insig	1.20703	0.00192319	down	1.11336	0.0560276	insig	1.23668	0.0574337	insig	0.871427	0.165335	insig
-0.628216	0.0740277	insig	-1.15477	0.000609282	down	-0.632866	0.0313577	insig	-0.54606	0.627328	insig	-0.49307	0.660585	insig	0.0287459	0.965509	insig	PB.1261	0.572276	0.504525	insig	0.13634	0.80261	insig	0.147006	0.815032	insig	-0.43225	0.402455	insig	-0.0161901	0.975952	insig	0.427809	0.575687	insig	1.6617	4.95886e-10	down	0.467846	0.296585	insig	0.33188	0.346121	insig	0.853969	0.0138227	insig
-0.672214	0.0287652	insig	-1.15637	0.0152816	down	-0.809925	0.00470487	insig	-0.502254	0.729505	insig	-0.314944	0.920224	insig	0.162542	0.70977	insig	PB.1263	-0.246447	0.863563	insig	0.147475	0.786315	insig	-0.328436	0.434202	insig	0.399094	0.485592	insig	0.470805	0.206422	insig	0.0849073	0.911257	insig	0.539877	0.0547706	insig	0.119082	0.772773	insig	-0.802058	0.095556	insig	0.0283208	0.9337	insig
0.784478	0.00196299	insig	1.32783	0.0262724	up	2.24424	4.01997e-06	up	0.521849	0.796083	insig	-0.88769	0.736336	insig	-1.42829	0.00963403	down	PB.1266	0.252049	0.744844	insig	-0.0119185	0.975997	insig	0.651281	0.000310512	insig	-0.259541	0.548885	insig	-0.668285	0.00147855	insig	-0.39583	0.326461	insig	-1.03689	2.63923e-08	up	-0.498498	0.0876243	insig	0.259661	0.688599	insig	0.521708	0.42802	insig
0.790543	0.373096	insig	1.83654	0.182552	insig	1.74379	0.0319582	up	1.01875	0.810339	insig	0.117792	0.993405	insig	-0.918408	0.319779	insig	PB.1267	0.146865	0.969508	insig	1.06035	0.0126156	up	1.13785	0.0602643	insig	0.917948	0.103092	insig	-0.0819493	0.888774	insig	-0.988927	0.288797	insig	-1.87223	0.00126305	up	-1.22048	0.0990662	insig	-1.1462	0.272574	insig	-1.29736	0.0807804	insig
-0.967678	0.0203572	insig	-1.04026	0.204682	insig	-0.722813	0.0223166	insig	-0.0921177	0.987831	insig	-0.289332	0.971555	insig	-0.220829	0.75166	insig	PB.1268	0.206559	0.936843	insig	0.132395	0.832923	insig	-0.892853	0.0768201	insig	-0.0689059	0.919528	insig	1.01938	0.000189981	up	1.10104	0.0238856	up	2.96144	9.17608e-23	down	1.79207	0.000165009	down	1.75167	0.0117695	down	3.10079	4.12519e-22	down
-0.4342	0.149508	insig	-0.345719	0.612665	insig	-0.760796	0.0172146	insig	0.0688955	0.982859	insig	0.443268	0.873859	insig	0.352178	0.337271	insig	PB.1270	0.316679	0.619961	insig	-0.0347724	0.925658	insig	-0.115955	0.732339	insig	-0.345553	0.326902	insig	0.0762099	0.800253	insig	0.434212	0.349537	insig	1.12054	1.21829e-06	down	0.374068	0.226539	insig	0.770029	0.132381	insig	0.44548	0.183323	insig
-0.261993	0.449746	insig	0.109668	0.858982	insig	0.12469	0.784265	insig	0.350207	0.791754	insig	0.0133995	0.997332	insig	-0.355805	0.362132	insig	PB.1273	0.0596666	0.973827	insig	0.0710078	0.860689	insig	0.0853968	0.828588	insig	0.0182548	0.969912	insig	-0.018859	0.943339	insig	-0.0245103	0.965622	insig	-0.715193	0.00955911	insig	-1.03163	5.95323e-05	up	-0.718757	0.0375898	insig	-0.709307	0.0237646	insig
0.531036	0.121089	insig	0.851335	0.054787	insig	0.18253	0.717623	insig	0.298416	0.793777	insig	0.696904	0.527509	insig	0.378773	0.374845	insig	PB.1274	-0.22284	0.832732	insig	-0.313945	0.240399	insig	0.285159	0.381883	insig	-0.0845508	0.864633	insig	-0.603766	0.00765119	insig	-0.50758	0.262561	insig	-1.00987	0.000256544	up	-0.248318	0.458142	insig	0.115361	0.738102	insig	-1.14216	0.00133405	up
0.363393	0.257123	insig	-0.330075	0.667356	insig	-0.745374	0.0674907	insig	-0.714504	0.660637	insig	0.448095	0.908936	insig	1.13786	0.00355704	up	PB.1276	-0.542454	0.0604741	insig	-0.689535	0.0102519	insig	-0.274821	0.186366	insig	-0.142113	0.806867	insig	-0.419744	0.181079	insig	-0.265744	0.489754	insig	-1.07013	2.35859e-06	up	-0.157015	0.624649	insig	-0.748471	0.204036	insig	-1.56745	9.92217e-05	up
-0.108358	0.686567	insig	-0.0323654	0.965402	insig	-0.300797	0.133051	insig	0.0556154	0.985246	insig	0.295847	0.92385	insig	0.219568	0.408684	insig	PB.1278	1.07973	0.00362714	up	0.955358	0.00149703	insig	0.362672	0.348434	insig	-0.118292	0.811219	insig	0.588329	0.0239779	insig	0.718996	0.0260946	insig	1.06665	5.78339e-06	down	-0.115107	0.688019	insig	0.0400201	0.945822	insig	0.373075	0.0744258	insig
-0.488267	0.442591	insig	1.4024	0.202541	insig	0.808913	0.226114	insig	1.86338	0.447731	insig	0.619386	0.940782	insig	-1.25782	0.133293	insig	PB.1279	-1.74559	0.00300098	down	-1.32836	0.00279872	down	-0.205422	0.588917	insig	0.419455	0.73041	insig	-1.1281	0.0276669	down	-1.53477	0.0316955	down	-1.36622	9.2342e-07	up	-0.099794	0.917443	insig	1.31788	0.192968	insig	-0.385034	0.616	insig
0.0506741	0.917498	insig	0.456633	0.474594	insig	-0.0931306	0.856669	insig	0.385696	0.80761	insig	0.576518	0.682808	insig	0.170583	0.658193	insig	PB.1281	-0.333182	0.838535	insig	-0.0534353	0.935945	insig	0.415442	0.448602	insig	0.286103	0.383553	insig	-0.473104	0.0685037	insig	-0.747545	0.0358157	insig	1.18038	0.00201832	down	1.57019	8.48663e-10	down	1.64873	1.16889e-05	down	0.641586	0.0228635	insig
-0.356826	0.360525	insig	0.99103	0.296906	insig	0.532651	0.221865	insig	1.32662	0.483256	insig	0.48547	0.937179	insig	-0.859158	0.0207728	insig	PB.1284	1.07244	0.640508	insig	-0.0131854	0.994366	insig	1.84568	0.0242485	up	-1.08146	0.418804	insig	-1.86276	0.0136317	down	-0.769842	0.544696	insig	3.11745	3.56664e-11	down	1.69143	0.000903795	down	4.08368	4.18577e-07	down	1.77076	9.22732e-05	down
-0.122297	0.700173	insig	-0.38337	0.424407	insig	0.0477704	0.893679	insig	-0.282197	0.842857	insig	-0.402353	0.80717	insig	-0.140848	0.683427	insig	PB.1287	-0.0185142	0.993734	insig	0.189818	0.636847	insig	-0.580697	0.12029	insig	0.214009	0.689707	insig	0.765421	0.031562	insig	0.56619	0.296387	insig	-0.465961	0.0451948	insig	-0.5643	0.0352886	insig	-1.08178	0.00425321	up	0.129819	0.728278	insig
-0.0504598	0.944957	insig	-0.401675	0.677571	insig	-0.519191	0.497136	insig	-0.371175	0.869612	insig	0.148955	0.99114	insig	0.49435	0.477644	insig	PB.1289	0.306864	0.917148	insig	0.0358276	0.96622	insig	0.0933822	0.910668	insig	-0.264572	0.734888	insig	-0.0631232	0.900731	insig	0.214938	0.822322	insig	-0.772182	0.148941	insig	-1.12222	0.0103325	up	-1.24603	0.0146357	up	-1.41109	0.0188715	up
-0.414956	0.0560039	insig	-1.03104	0.0403721	down	-1.00487	2.79939e-07	down	-0.635239	0.622444	insig	0.00638598	0.998035	insig	0.61739	0.000756415	insig	PB.1291	-0.0349418	0.981531	insig	-0.0767715	0.809222	insig	-0.588497	0.0229584	insig	-0.036173	0.932508	insig	0.506666	0.0266815	insig	0.556512	0.107133	insig	-0.262094	0.192868	insig	-0.63652	0.00165455	insig	-1.25388	0.00456713	up	-0.709526	0.00262705	insig
0.254805	0.40725	insig	0.189808	0.830904	insig	-0.667787	0.0297173	insig	-0.0864434	0.982859	insig	0.890031	0.672379	insig	0.952791	0.00704395	insig	PB.1292	-0.0349441	0.979758	insig	-0.202601	0.407563	insig	0.455938	0.0138053	insig	-0.162911	0.623459	insig	-0.663643	8.04079e-05	insig	-0.48809	0.0802318	insig	-1.51585	5.94569e-19	up	-1.21947	1.35293e-05	up	-1.16418	0.0525113	insig	-2.66821	2.6079e-19	up
0.354635	0.177711	insig	-0.0479734	0.932227	insig	0.687115	0.0791224	insig	-0.422296	0.684488	insig	-0.705455	0.62441	insig	-0.308054	0.540683	insig	PB.1293	-0.279835	0.654925	insig	0.0480162	0.887812	insig	-0.226001	0.45678	insig	0.332564	0.350605	insig	0.268841	0.329398	insig	-0.0496739	0.939271	insig	-1.50666	8.73629e-17	up	-0.866106	0.000666878	insig	-1.64338	1.35131e-07	up	-0.621469	0.17534	insig
0.297877	0.54725	insig	0.571563	0.382263	insig	-0.304362	0.510475	insig	0.253342	0.920401	insig	0.901716	0.44556	insig	0.627069	0.1804	insig	PB.1294	0.644896	0.956358	insig	-2.13794	NA	insig	-2.27746	0.225165	insig	-2.77195	0.0159404	down	0.135726	0.807598	insig	2.91686	0.183834	insig	-0.80189	0.534835	insig	-1.14088	0.448949	insig	1.86758	5.76159e-05	down	1.14668	0.000945178	down
0.472954	0.0531746	insig	0.957342	0.00298995	insig	0.342287	0.275246	insig	0.462979	0.511947	insig	0.64367	0.414412	insig	0.160847	0.680122	insig	PB.1296	0.0998743	0.956358	insig	-0.151357	0.742909	insig	0.525	0.0320407	insig	-0.247381	0.694907	insig	-0.681173	0.0335359	insig	-0.421712	0.343334	insig	0.260939	0.247822	insig	0.640251	0.0249063	insig	1.32939	0.000116584	down	0.0467479	0.885883	insig
0.0257677	0.951347	insig	0.165991	0.723913	insig	0.685076	0.0212157	insig	0.11957	0.934142	insig	-0.490044	0.598506	insig	-0.63103	0.0271328	insig	PB.1297	-0.254228	0.885779	insig	0.35018	0.297023	insig	0.277542	0.461199	insig	0.608585	0.209939	insig	0.0678242	0.842479	insig	-0.528079	0.439946	insig	0.817401	0.00194609	insig	1.104	0.00228801	down	0.593772	0.036398	insig	1.19512	2.41105e-06	down
-0.192388	0.476266	insig	-0.445451	0.296832	insig	-0.250086	0.409549	insig	-0.273123	0.839813	insig	-0.165519	0.968324	insig	0.0843372	0.835818	insig	PB.1298	-0.157573	0.851473	insig	-0.0896104	0.756646	insig	-0.694149	0.00039541	insig	0.073311	0.846249	insig	0.599422	0.000559699	insig	0.53927	0.0839972	insig	-0.801576	2.11386e-05	insig	-0.830745	0.000270667	insig	-1.19625	0.0001676	up	-0.387156	0.163378	insig
-0.494676	0.225848	insig	-0.38937	0.612607	insig	0.213461	0.625939	insig	0.0860546	0.979674	insig	-0.577257	0.789174	insig	-0.685706	0.0583535	insig	PB.1305	0.620526	0.742058	insig	0.344462	0.635855	insig	-0.647663	0.685072	insig	-0.271977	0.333602	insig	0.986294	0.137986	insig	1.2746	0.143391	insig	-0.133053	0.809731	insig	-1.24418	0.000290129	up	-0.905826	0.0845249	insig	0.695082	0.341574	insig
-0.0707461	0.849419	insig	0.0755579	0.913875	insig	0.698982	0.00863046	insig	0.125432	0.952538	insig	-0.594337	0.654779	insig	-0.74149	0.00130849	insig	PB.1306	1.47558	1.88793e-07	up	0.956512	0.00510936	insig	-0.373796	0.109064	insig	-0.51071	0.404802	insig	1.32583	0.000208548	up	1.84939	9.01633e-10	up	0.50687	0.0312166	insig	-1.03284	0.000413937	up	-0.413957	0.460431	insig	1.54926	9.24719e-17	down
0.347451	0.558821	insig	0.277751	0.784909	insig	0.500483	0.381724	insig	-0.0909238	0.977482	insig	-0.195092	0.976989	insig	-0.124491	0.806486	insig	PB.1307	-0.114352	0.974078	insig	-0.227534	0.707054	insig	-0.332849	0.58092	insig	-0.10335	0.904321	insig	0.101562	0.734962	insig	0.217108	0.777883	insig	-3.84968	1.00211e-18	up	-3.38214	1.72638e-18	up	-3.38971	1.43662e-13	up	-3.04751	6.30453e-43	up
0.190129	0.495244	insig	0.203856	0.609161	insig	-0.134044	0.632166	insig	-0.00713724	0.997263	insig	0.369266	0.740002	insig	0.354662	0.191624	insig	PB.1309	0.146829	0.911947	insig	0.478708	0.052045	insig	0.243603	0.453997	insig	0.336841	0.180426	insig	0.229758	0.273697	insig	-0.0935938	0.843736	insig	-1.13806	7.99915e-08	up	-1.09011	2.42911e-06	up	-1.45332	7.87919e-09	up	-1.5482	1.52671e-14	up
1.03222	0.11905	insig	1.60943	0.275688	insig	0.722061	0.587345	insig	0.558478	0.919481	insig	0.927701	0.929788	insig	0.342289	0.833848	insig	PB.1310	0.810762	0.677963	insig	-0.365249	0.672876	insig	-0.990584	0.226966	insig	-1.16862	0.000798451	down	0.622078	0.0057714	insig	1.80463	9.09964e-06	up	-3.83435	1.41868e-10	up	-3.60003	3.82274e-22	up	-1.8916	0.0813745	insig	-2.15542	0.0546946	insig
0.124281	0.61506	insig	0.0410668	0.952717	insig	0.0730497	0.794946	insig	-0.104048	0.960107	insig	-0.00444039	0.998611	insig	0.0784315	0.75672	insig	PB.1311	-0.364213	0.654984	insig	-0.87642	1.37033e-05	insig	-0.106711	0.766007	insig	-0.506108	0.277898	insig	-0.774677	0.00575303	insig	-0.256319	0.6849	insig	0.211577	0.245378	insig	0.706403	0.0170233	insig	1.09141	0.0103786	down	0.360998	0.18877	insig
-0.394942	0.135638	insig	-0.683383	0.175479	insig	-0.222077	0.362708	insig	-0.30737	0.876784	insig	-0.43165	0.830372	insig	-0.147738	0.679903	insig	PB.1312	0.06964	0.973827	insig	0.233704	0.546847	insig	-0.412472	0.199265	insig	0.171874	0.772399	insig	0.641687	0.0175202	insig	0.482485	0.307474	insig	1.24998	5.06169e-09	down	0.791182	0.0120708	insig	0.293924	0.579311	insig	1.41022	5.52341e-12	down
-0.291127	0.382483	insig	-0.401236	0.741729	insig	-0.875349	0.0373534	insig	-0.128467	0.981212	insig	0.508406	0.946319	insig	0.610762	0.199903	insig	PB.1314	0.254542	0.967409	insig	-0.212932	0.885742	insig	1.36773	0.171681	insig	-0.460319	0.708169	insig	-1.58454	0.00896482	down	-1.10962	0.0642071	insig	1.5225	0.0160255	down	0.982769	0.0159789	insig	1.29532	0.199383	insig	-0.750309	0.106474	insig
-0.380491	0.0929131	insig	-0.735881	0.0206578	insig	-0.285649	0.259958	insig	-0.375885	0.548244	insig	-0.42047	0.629876	insig	-0.066608	0.817047	insig	PB.1316	-0.00767568	0.998514	insig	0.467722	0.0114676	insig	-0.11235	0.671572	insig	0.480182	0.209939	insig	0.575216	0.000201383	insig	0.108714	0.869755	insig	1.0787	9.45282e-09	down	0.712318	0.0113363	insig	-0.164342	0.580895	insig	0.874076	1.43872e-06	insig
-0.736633	0.00567269	insig	-1.27135	0.000454574	down	-0.531062	0.165844	insig	-0.554314	0.627328	insig	-0.710427	0.625903	insig	-0.181103	0.762016	insig	PB.1317	-0.389301	0.695625	insig	-0.18999	0.614158	insig	-0.538386	0.0931003	insig	0.205113	0.675469	insig	0.343245	0.103537	insig	0.150221	0.795902	insig	0.739627	0.00125997	insig	0.398286	0.277245	insig	-0.379586	0.334689	insig	0.71928	0.0934108	insig
0.366109	0.172322	insig	0.26475	0.541015	insig	-0.440648	0.261063	insig	-0.12255	0.935739	insig	0.735609	0.528075	insig	0.835079	0.0260059	insig	PB.1323	0.0619682	0.969508	insig	0.294883	0.152564	insig	0.303588	0.140977	insig	0.238585	0.482927	insig	-0.0138046	0.947332	insig	-0.240341	0.541619	insig	-0.844511	2.64103e-05	insig	-0.534048	0.0456462	insig	-0.913037	0.0010584	insig	-1.61596	1.19756e-05	up
0.0689322	0.895145	insig	-0.180025	0.853476	insig	0.0956182	0.859192	insig	-0.269537	0.92621	insig	-0.245165	0.973225	insig	0.00111192	0.998369	insig	PB.1324	-0.249481	0.929331	insig	0.481004	0.262546	insig	-0.129249	0.846411	insig	0.735928	0.233034	insig	0.606203	0.102853	insig	-0.114742	0.924503	insig	-0.838383	0.0233284	insig	-0.5127	0.325504	insig	-1.54134	0.00589201	up	-0.644618	0.101823	insig
-0.698224	0.0326303	insig	-0.985124	0.0281225	insig	-0.765012	0.00477056	insig	-0.305999	0.880239	insig	-0.191366	0.961057	insig	0.0913213	0.866968	insig	PB.1325	0.129131	0.962226	insig	0.114677	0.86191	insig	-0.608807	0.214852	insig	-0.00914556	0.99123	insig	0.717801	0.030746	insig	0.740195	0.0542829	insig	1.68607	5.24588e-08	down	0.862923	0.015432	insig	0.546124	0.246384	insig	1.49882	1.91024e-09	down
0.302872	0.244845	insig	0.984835	0.00319476	insig	0.357687	0.317746	insig	0.661179	0.28185	insig	0.655309	0.539727	insig	-0.025819	0.965181	insig	PB.1326	-0.0193997	0.989668	insig	-0.546975	0.177088	insig	0.54954	0.0120493	insig	-0.523962	0.381461	insig	-1.10149	0.00425423	down	-0.566481	0.0897391	insig	0.401068	0.0462449	insig	0.728976	0.00259546	insig	1.89272	2.95347e-06	down	0.177209	0.646344	insig
-0.67484	0.012979	insig	-0.338399	0.644395	insig	-0.0160616	0.966752	insig	0.315052	0.899633	insig	-0.296041	0.947039	insig	-0.631843	0.0144838	insig	PB.1328	0.637075	0.41845	insig	0.421046	0.311126	insig	-0.385232	0.364661	insig	-0.20987	0.717659	insig	0.80076	0.00204704	insig	1.02328	0.00250121	up	0.458743	0.126209	insig	-0.847735	0.00537993	insig	-0.340285	0.592181	insig	0.79768	0.00020884	insig
-0.186054	0.524749	insig	0.0440859	0.9457	insig	-0.0837038	0.808568	insig	0.208592	0.909995	insig	0.15747	0.974118	insig	-0.0723526	0.869438	insig	PB.1332	0.101747	0.952769	insig	0.157973	0.622328	insig	-0.422952	0.0949747	insig	0.0631816	0.920627	insig	0.576186	0.00957022	insig	0.525707	0.246836	insig	1.57242	1.19586e-14	down	1.29106	4.72163e-06	down	1.42012	0.000177723	down	1.88204	3.41037e-15	down
-0.475522	0.231912	insig	-0.654535	0.313794	insig	-0.721999	0.0813895	insig	-0.199866	0.935646	insig	0.0971275	0.992802	insig	0.27469	0.58988	insig	PB.1334	0.154565	0.918999	insig	0.191827	0.633703	insig	0.124749	0.749448	insig	0.0432142	0.950109	insig	0.0618571	0.868389	insig	0.0320835	0.961039	insig	-0.955307	0.00118229	insig	-1.58043	8.01035e-07	up	-1.84562	3.23958e-05	up	-1.83369	3.05954e-08	up
-0.347209	0.345969	insig	-1.14595	0.0582703	insig	-0.618451	0.132328	insig	-0.817909	0.645383	insig	-0.499525	0.891213	insig	0.293862	0.645303	insig	PB.1335	0.793402	0.221086	insig	-0.303865	0.417986	insig	-0.761998	0.0419754	insig	-1.09091	0.00670229	down	0.452838	0.162708	insig	1.55544	0.00196255	up	1.96274	6.64862e-19	down	0.827706	0.0625945	insig	1.08314	0.0547241	insig	2.07964	4.33091e-06	down
0.603739	0.00378337	insig	0.753218	0.022624	insig	0.131187	0.655849	insig	0.128555	0.933679	insig	0.653462	0.426059	insig	0.503469	0.0652965	insig	PB.1336	-0.251551	0.756119	insig	-0.560984	0.220623	insig	0.72918	0.00141535	insig	-0.306034	0.687795	insig	-1.29513	0.00170229	down	-0.978184	0.000215403	insig	-0.248586	0.202417	insig	0.613204	0.00994245	insig	1.02767	0.0312223	down	-0.877774	0.000222118	insig
-0.519633	0.108801	insig	-0.813412	0.0664055	insig	-0.954551	0.0101116	insig	-0.315457	0.786558	insig	0.168523	0.972983	insig	0.462185	0.247222	insig	PB.1338	-0.00774649	0.998971	insig	-0.0168746	0.980512	insig	0.205104	0.752283	insig	-0.0052202	0.995635	insig	-0.227578	0.673648	insig	-0.211452	0.83648	insig	1.38599	3.78073e-06	down	0.881065	0.00755409	insig	0.550733	0.17147	insig	0.200414	0.697451	insig
-0.287788	0.408852	insig	-1.28427	0.00581386	down	-0.782389	0.0178604	insig	-1.0166	0.298654	insig	-0.4728	0.839171	insig	0.520563	0.236046	insig	PB.1339	3.76175	1.43382e-44	up	3.02835	0.000320198	up	2.72252	3.64802e-14	up	-0.72928	0.773841	insig	0.300603	0.873344	insig	1.04211	0.0134547	up	3.08611	1.36266e-33	down	-0.957382	0.00375409	insig	-1.26306	0.217651	insig	-0.449072	0.3102	insig
-0.314604	0.125348	insig	-0.666684	0.100842	insig	-0.765564	0.00295678	insig	-0.371803	0.759175	insig	0.128089	0.980857	insig	0.476463	0.10658	insig	PB.1341	-0.384735	0.728221	insig	-1.0801	0.000432888	down	-0.644591	0.12425	insig	-0.690396	0.00714436	insig	-0.440854	0.115611	insig	0.262796	0.589702	insig	0.369221	0.18563	insig	0.444552	0.0586327	insig	0.744755	0.0463648	insig	0.218295	0.569501	insig
-1.59825	5.25097e-09	down	-1.70134	0.0165572	down	-1.19942	1.67252e-06	down	-0.123673	0.974877	insig	-0.474957	0.91113	insig	-0.372192	0.226919	insig	PB.1342	0.605838	0.718499	insig	-0.132021	0.863594	insig	-1.13731	0.0455198	down	-0.731469	0.245231	insig	0.999232	0.00789503	insig	1.74222	0.000892392	up	2.19002	1.69948e-09	down	-0.00998816	0.985861	insig	0.581991	0.44476	insig	2.09627	8.41729e-17	down
-0.255149	0.285923	insig	-0.498944	0.205162	insig	-0.846323	0.00405474	insig	-0.263969	0.844863	insig	0.377309	0.853831	insig	0.617747	0.0652947	insig	PB.1343	-0.147505	0.947478	insig	-1.04917	0.00380591	down	-0.572872	0.197564	insig	-0.896987	0.0297921	insig	-0.481863	0.187408	insig	0.427481	0.410046	insig	1.2163	6.3037e-06	down	1.11349	7.78588e-05	down	1.7286	2.60275e-06	down	0.9126	0.0161728	insig
1.03025	0.0155354	up	-0.614594	0.601407	insig	-0.457343	0.554131	insig	-1.66256	0.344058	insig	-0.119201	0.993405	insig	1.51472	0.0101092	up	PB.1344	0.779737	0.789996	insig	-1.5717	0.126487	insig	-2.87208	0.00712784	down	-2.34769	0.00174136	down	1.29399	0.233111	insig	3.65591	2.21157e-06	up	2.84676	2.07261e-06	down	3.09875	1.29879e-33	down	3.76747	2.10553e-05	down	5.23255	3.74499e-12	down
0.507517	0.363695	insig	1.10063	0.283744	insig	0.588101	0.34671	insig	0.573036	0.869086	insig	0.54695	0.930183	insig	-0.049839	0.957457	insig	PB.1345	-0.589086	0.471824	insig	-0.510442	0.202166	insig	-0.561339	0.177127	insig	0.0842736	0.914364	insig	0.0458889	0.917679	insig	-0.0259931	0.979099	insig	-2.49035	1.46318e-12	up	-1.38728	0.00142849	up	-0.92172	0.248435	insig	-1.37164	0.00412134	up
-0.0751009	0.76126	insig	0.144704	0.717807	insig	0.0562611	0.860417	insig	0.199172	0.857487	insig	0.116315	0.97544	insig	-0.103804	0.753491	insig	PB.1346	-0.17842	0.854153	insig	-0.405875	0.120697	insig	-0.144104	0.63209	insig	-0.22204	0.642186	insig	-0.266624	0.377947	insig	-0.0337433	0.960304	insig	1.1784	9.80165e-14	down	1.28761	7.77108e-09	down	1.68853	5.32128e-09	down	1.34796	9.09201e-08	down
-0.374244	0.50408	insig	0.652268	0.483738	insig	0.630409	0.480255	insig	1.00136	0.632351	insig	0.04513	0.995519	insig	-0.976714	0.311224	insig	PB.1348	-1.24214	0.0604741	insig	0.707146	0.676979	insig	-0.270092	0.670606	insig	1.95999	0.299124	insig	0.973616	0.535173	insig	-0.969404	0.0204464	insig	-1.97345	1.57142e-06	up	-1.096	0.0201423	up	-2.07066	0.0406184	up	-1.09292	0.221521	insig
-0.0798653	0.977801	insig	-4.72641	0.402834	insig	-2.17009	0.55511	insig	-4.65989	0.541616	insig	-2.53139	0.952616	insig	2.1236	0.480435	insig	PB.1350	-0.330795	0.522413	insig	0.068511	0.853803	insig	-0.404175	0.126304	insig	0.405429	0.283878	insig	0.467986	0.0926012	insig	0.0749847	0.916758	insig	-6.85061	1.05643e-31	up	-6.54728	1.60068e-32	up	-11.6268	3.95122e-19	up	-8.65717	3.84402e-19	up
1.36966	0.0167361	up	3.74471	0.00013962	up	2.70966	6.46657e-07	up	2.34895	0.233337	insig	1.06098	0.79382	insig	-1.30333	0.0586109	insig	PB.1352	-0.152665	0.948286	insig	0.564102	0.172743	insig	2.01629	1.46719e-08	up	0.722371	0.0279173	insig	-1.45627	6.71308e-13	down	-2.16613	2.74516e-15	down	-2.68723	3.17504e-11	up	-1.15649	0.0353476	up	0.446297	0.683105	insig	-2.02487	0.000189748	up
-0.488012	0.115823	insig	0.214346	0.845972	insig	-0.429759	0.200499	insig	0.682358	0.810339	insig	0.670836	0.858606	insig	-0.0316703	0.952282	insig	PB.1353	0.699286	0.0679873	insig	0.364921	0.164838	insig	0.670299	0.0999319	insig	-0.328858	0.249609	insig	-0.310729	0.40232	insig	0.0291559	0.972327	insig	2.44932	1.66572e-23	down	1.26588	3.66406e-06	down	2.26026	0.0013322	down	1.31747	0.000305969	down
1.71961	0.0087609	up	2.12245	0.0192634	up	1.14848	0.118917	insig	0.383473	0.900941	insig	1.00402	0.684373	insig	0.600356	0.331402	insig	PB.1355	0.450938	0.727359	insig	1.19578	0.0028631	up	1.27931	0.00151504	up	0.751226	0.203683	insig	-0.0882515	0.871623	insig	-0.826258	0.227381	insig	-2.15109	3.86598e-05	up	-0.874928	0.0929667	insig	-1.26537	0.0443753	up	-2.31157	4.05315e-08	up
-0.384076	0.222669	insig	-1.23142	0.0552855	insig	-1.01323	0.112188	insig	-0.866219	0.573425	insig	-0.184689	0.987607	insig	0.652503	0.405864	insig	PB.1356	-0.109997	0.942902	insig	0.626215	0.0113295	insig	0.179989	0.597317	insig	0.741452	0.00360208	insig	0.441488	0.0420812	insig	-0.286941	0.513953	insig	0.263296	0.327337	insig	-0.00365855	0.992437	insig	-1.63242	0.00238123	up	-0.953877	0.20208	insig
1.22053	0.0290772	up	1.64153	0.0831865	insig	0.262021	0.639577	insig	0.397965	0.926304	insig	1.41043	0.499351	insig	0.994599	0.0949916	insig	PB.1357	-0.00434105	0.998971	insig	1.01852	0.000825778	up	1.31754	8.65402e-05	up	1.0279	0.00270363	up	-0.30336	0.0753206	insig	-1.31766	0.000682062	down	-2.3191	5.98895e-10	up	-1.08942	0.0596858	insig	-1.74354	0.0217104	up	-3.409	9.18613e-45	up
2.32553	5.53181e-05	up	3.55595	0.000197164	up	2.24396	1.91099e-06	up	1.2046	0.726836	insig	1.34126	0.680526	insig	0.117659	0.925599	insig	PB.1358	0.505867	0.671071	insig	1.64348	5.13006e-06	up	1.41483	0.000518292	up	1.14259	0.000414098	up	0.223163	0.489462	insig	-0.904961	0.0032972	insig	-3.81961	2.12135e-29	up	-1.99478	0.0011815	up	-1.95424	0.0314056	up	-3.01783	8.95455e-10	up
1.61375	0.000429731	up	2.35005	0.00394588	up	1.11939	0.00510281	up	0.711605	0.828659	insig	1.25983	0.565657	insig	0.530638	0.411001	insig	PB.1359	0.116411	0.969508	insig	1.09339	3.5783e-05	up	1.17349	0.00013419	up	0.980627	0.0462009	insig	-0.0850255	0.69612	insig	-1.05099	0.0532025	insig	-2.22095	5.12791e-13	up	-0.715786	0.227898	insig	-1.00807	0.193826	insig	-2.30592	3.29373e-12	up
0.668275	0.352438	insig	3.16534	0.00417845	up	2.77596	0.000281123	up	2.47414	0.160471	insig	0.411996	0.973225	insig	-2.07469	0.00417061	down	PB.1361	2.56257	0.0577121	insig	1.98999	0.0877362	insig	0.574522	0.731652	insig	-0.570266	0.700946	insig	1.40908	0.137621	insig	1.98794	0.00496968	up	2.14181	0.0130701	down	0.249346	0.686764	insig	3.27889	0.00150692	down	4.30416	1.36708e-08	down
-0.55747	0.0525435	insig	-1.27783	0.0222028	down	-0.817263	0.101887	insig	-0.739579	0.601445	insig	-0.428876	0.929614	insig	0.284109	0.677917	insig	PB.1362	-0.0838321	0.946366	insig	0.0546927	0.887375	insig	-0.814424	2.96304e-06	insig	0.145666	0.778515	insig	0.864441	0.00041388	insig	0.732222	0.015104	insig	0.543743	0.0136101	insig	0.0767739	0.819484	insig	-0.825963	0.119977	insig	0.51446	0.38361	insig
-0.495706	0.0389042	insig	-0.595033	0.0753652	insig	-0.260978	0.439615	insig	-0.119546	0.92621	insig	-0.305065	0.869167	insig	-0.208801	0.585811	insig	PB.1364	0.0685283	0.980104	insig	-0.942822	0.00553649	insig	-0.666026	0.10984	insig	-1.00601	0.000934063	down	-0.282447	0.1575	insig	0.735545	0.066677	insig	1.00263	0.000588524	down	0.443049	0.149871	insig	1.31038	1.69216e-07	down	1.37788	3.31073e-06	down
-0.301873	0.280183	insig	-0.674349	0.228287	insig	-0.31344	0.475877	insig	-0.392331	0.837748	insig	-0.332814	0.94289	insig	0.0357189	0.960697	insig	PB.1365	-0.265616	0.821684	insig	-0.670679	0.00329904	insig	-0.521579	0.0389584	insig	-0.399286	0.36668	insig	-0.154231	0.519091	insig	0.256865	0.655284	insig	1.17605	8.90562e-09	down	1.14574	0.000222865	down	1.13497	0.0144032	down	1.35686	0.00125763	down
0.474731	0.0826262	insig	0.907852	0.164425	insig	0.816304	0.213815	insig	0.412008	0.856211	insig	0.119432	0.993405	insig	-0.310638	0.729261	insig	PB.1366	1.97102	1.58137e-07	up	-0.20151	0.79545	insig	0.605964	0.523568	insig	-2.16571	3.36143e-06	down	-0.811458	0.339052	insig	1.36315	0.131639	insig	1.895	1.43477e-10	down	0.406954	0.113131	insig	2.9679	4.75045e-07	down	2.07546	0.016658	down
0.546498	0.133074	insig	0.857679	0.120289	insig	0.0245974	0.956411	insig	0.288557	0.90429	insig	0.863031	0.497069	insig	0.554813	0.202094	insig	PB.1367	0.10861	0.947478	insig	0.264044	0.205199	insig	0.318299	0.070091	insig	0.159466	0.765238	insig	-0.0593354	0.794641	insig	-0.20516	0.707293	insig	-1.09106	3.09982e-07	up	-0.645851	0.111762	insig	-0.537822	0.265981	insig	-1.41522	6.38059e-08	up
-0.790806	0.00196408	insig	-0.674652	0.312852	insig	-0.554353	0.073655	insig	0.0959099	0.975774	insig	-0.0939913	0.993405	insig	-0.211888	0.634162	insig	PB.1368	0.405211	0.526764	insig	0.088693	0.7526	insig	-0.237816	0.247073	insig	-0.310154	0.486956	insig	0.321512	0.106938	insig	0.643583	0.118582	insig	1.43111	1.35076e-17	down	0.240562	0.514955	insig	0.628705	0.290506	insig	1.08571	0.000689947	down
-0.859689	0.00306406	insig	-0.960703	0.145555	insig	-0.545047	0.087417	insig	-0.120839	0.972069	insig	-0.388117	0.930183	insig	-0.290396	0.539763	insig	PB.1369	0.211125	0.932043	insig	-0.0853383	0.90035	insig	-0.879209	0.0518628	insig	-0.290418	0.665777	insig	0.788055	0.0270961	insig	1.09204	0.00966773	up	2.13163	6.1923e-13	down	1.06493	0.00326171	down	1.21757	0.0468947	down	2.43479	2.30318e-12	down
-0.194977	0.715812	insig	0.0724398	0.922948	insig	0.34912	0.350017	insig	0.247981	0.92298	insig	-0.247162	0.939214	insig	-0.518811	0.283825	insig	PB.1370	-0.582877	0.634621	insig	0.0273041	0.969091	insig	-0.390935	0.506946	insig	0.616918	0.157121	insig	0.413341	0.226658	insig	-0.192301	0.798756	insig	0.968312	0.00966769	insig	1.36149	0.00289844	down	0.973796	0.0199256	insig	1.67762	7.90836e-10	down
-0.520516	0.065349	insig	-1.28069	0.0161236	down	-0.772314	0.0943434	insig	-0.780282	0.491831	insig	-0.478511	0.887733	insig	0.277088	0.641235	insig	PB.1371	-0.0569961	0.973827	insig	-0.385852	0.109799	insig	-0.882466	0.00104205	insig	-0.322281	0.470099	insig	0.491549	0.106545	insig	0.827366	0.0476784	insig	-0.184968	0.461335	insig	-0.642125	0.0197337	insig	-1.11722	0.0175842	up	-0.10262	0.864209	insig
0.672042	0.0818343	insig	0.483675	0.448912	insig	-0.305048	0.380565	insig	-0.210989	0.942777	insig	0.819856	0.60846	insig	1.00912	0.0272073	up	PB.1372	0.461312	0.892246	insig	-0.234466	0.910974	insig	0.610764	0.662831	insig	-0.694947	0.727707	insig	-0.84986	0.527568	insig	-0.146323	0.681715	insig	-2.49786	2.13085e-06	up	-2.27771	1.1785e-09	up	-1.81331	0.032063	up	-3.43887	1.70609e-34	up
2.10334	0.0417791	up	4.19876	0.00414882	up	1.00061	0.40585	insig	2.06681	0.549056	insig	3.22266	0.127643	insig	1.13949	0.257048	insig	PB.1374	-0.318396	0.918999	insig	0.264845	0.759073	insig	1.62602	0.00119895	up	0.587313	0.591315	insig	-1.36604	0.0137924	down	-1.94336	0.00934876	down	-2.39802	0.00141895	up	0.0323556	0.978138	insig	1.48933	0.255346	insig	-3.05076	2.4388e-08	up
-1.02397	0.0529698	insig	-2.07301	0.0114921	down	-2.67629	2.53508e-14	down	-1.06714	0.693315	insig	0.633131	0.899019	insig	1.67576	0.00403525	up	PB.1375	1.21956	0.0164965	up	0.928224	0.0310779	insig	-1.58045	0.000105007	down	-0.286692	0.714307	insig	2.50331	2.3444e-10	up	2.8044	1.13859e-10	up	0.994765	0.003353	insig	-1.24384	0.0367718	up	-2.0441	0.00644492	up	-0.132619	0.782742	insig
-1.56715	0.0010821	down	-2.44033	2.74555e-05	down	-1.62864	0.00875071	down	-0.892021	0.583581	insig	-0.780145	0.79382	insig	0.0837504	0.945142	insig	PB.1376	-0.613712	0.84654	insig	0.677457	0.284924	insig	-2.06804	0.0019837	down	1.30345	0.130121	insig	2.74191	1.68318e-12	up	1.44661	0.144499	insig	-0.177294	0.755476	insig	-1.1245	0.127122	insig	-3.33591	1.1444e-14	up	0.236999	0.783745	insig
-0.0476082	0.927118	insig	0.233674	0.837394	insig	-0.0337857	0.961178	insig	0.259948	0.946133	insig	0.291924	0.974346	insig	0.0102649	0.988882	insig	PB.1377	-0.103016	0.950128	insig	-0.643007	0.051786	insig	-1.15264	0.000136495	down	-0.53419	0.288188	insig	0.504427	0.203751	insig	1.05205	0.0400818	up	3.5003	1.85897e-31	down	3.56217	1.84132e-31	down	4.33771	1.96588e-10	down	4.59103	1.76555e-24	down
0.750061	0.209845	insig	1.3001	0.143445	insig	0.760642	0.24949	insig	0.526577	0.876784	insig	0.568787	0.915845	insig	0.0241119	0.982023	insig	PB.1380	0.100942	0.968727	insig	0.629542	0.0576546	insig	0.499196	0.269252	insig	0.532828	0.253618	insig	0.125123	0.76852	insig	-0.394187	0.614361	insig	-1.88536	8.8654e-08	up	-1.23055	0.024392	up	-1.26004	0.0562288	insig	-1.65899	0.00344512	up
-0.423237	0.288398	insig	-0.482698	0.47561	insig	-1.05415	0.00125797	down	-0.0819232	0.978353	insig	0.602701	0.724941	insig	0.664858	0.0612273	insig	PB.1381	0.167692	0.962981	insig	-0.115791	0.887812	insig	-0.525444	0.456997	insig	-0.280499	0.486987	insig	0.402965	0.120172	insig	0.694545	0.0515069	insig	1.64215	0.000162988	down	1.05384	0.00185967	down	1.23751	0.00870911	down	1.08001	1.84452e-06	down
0.748529	0.0219413	insig	1.56748	0.0556223	insig	1.21637	0.0323268	up	0.796417	0.732029	insig	0.378328	0.964129	insig	-0.437219	0.544473	insig	PB.1382	0.233308	0.937987	insig	-0.0997344	0.897558	insig	-0.0799364	0.928667	insig	-0.323681	0.540951	insig	-0.0235719	0.964774	insig	0.311164	0.682033	insig	-1.80759	9.53332e-06	up	-1.28426	2.74207e-05	up	-0.188119	0.830316	insig	-0.543535	0.443934	insig
0.421676	0.165633	insig	-0.491736	0.542216	insig	-0.916172	0.182735	insig	-0.9334	0.595047	insig	0.458897	0.952616	insig	1.36414	0.0581976	insig	PB.1383	0.12185	0.932043	insig	0.375568	0.146404	insig	0.830378	0.00225389	insig	0.258351	0.383093	insig	-0.460009	0.0431183	insig	-0.704955	0.0313629	insig	-0.4426	0.0569596	insig	-0.135954	0.699173	insig	-1.3454	0.0262963	up	-2.21259	0.00311794	up
-0.539767	0.137611	insig	-0.237482	0.763305	insig	0.25331	0.568218	insig	0.280146	0.900598	insig	-0.461761	0.854839	insig	-0.762796	0.00425252	insig	PB.1384	-0.386251	0.451549	insig	0.031515	0.932975	insig	-0.520685	0.067765	insig	0.423301	0.0443619	insig	0.547394	0.0097958	insig	0.13735	0.781201	insig	-1.75521	1.69676e-09	up	-1.90115	4.08984e-18	up	-2.06656	1.87267e-06	up	-1.01262	0.000247471	up
2.1585	0.00204066	up	3.18139	0.00274128	up	2.10299	0.0128194	up	0.998475	0.768108	insig	1.10831	0.802959	insig	0.0924853	0.951896	insig	PB.1386	0.515847	0.680805	insig	0.332962	0.506752	insig	-0.192928	0.758688	insig	-0.176798	0.656831	insig	0.521893	0.00159748	insig	0.712068	0.0437705	insig	-4.92496	5.08117e-26	up	-3.27759	5.328e-11	up	-2.12539	0.0100948	up	-2.66585	0.000249208	up
-0.448246	0.0907177	insig	-0.205794	0.669197	insig	0.0950049	0.821897	insig	0.222721	0.876784	insig	-0.271312	0.924979	insig	-0.515691	0.127287	insig	PB.1388	0.244003	0.821684	insig	-0.0235033	0.962192	insig	-0.138425	0.74984	insig	-0.261506	0.579616	insig	0.109737	0.768378	insig	0.383299	0.467453	insig	1.1575	4.33001e-07	down	0.470046	0.0989531	insig	0.935123	0.00624383	insig	1.3578	4.69919e-05	down
0.429015	0.374791	insig	-0.254122	0.840699	insig	0.464223	0.298939	insig	-0.699727	0.842324	insig	-0.677854	0.88724	insig	-0.00712688	0.991981	insig	PB.1391	0.804568	0.771111	insig	2.73099	3.48576e-08	up	2.32245	0.000464616	up	1.92686	0.00871453	up	0.401828	0.435545	insig	-1.51053	0.0989957	insig	2.28018	2.04343e-06	down	1.9063	0.00271623	down	-0.741536	0.42933	insig	0.388149	0.431256	insig
0.768375	0.186343	insig	1.2311	0.0907972	insig	0.870847	0.145776	insig	0.442649	0.783623	insig	0.385869	0.885574	insig	-0.0783916	0.906314	insig	PB.1392	0.155004	0.848691	insig	0.496595	0.0546346	insig	-0.180606	0.461374	insig	0.347965	0.374198	insig	0.672522	0.00657936	insig	0.337799	0.358385	insig	-3.61032	1.23558e-21	up	-2.9918	3.29182e-24	up	-2.9195	7.18479e-17	up	-2.58903	2.56475e-18	up
-0.314531	0.457631	insig	0.2067	0.718176	insig	0.154206	0.745059	insig	0.501506	0.632351	insig	0.0812103	0.99147	insig	-0.442381	0.279591	insig	PB.1393	-0.0210281	0.997756	insig	-0.361391	0.492783	insig	-1.72033	9.76527e-05	down	-0.331268	0.797353	insig	1.35435	0.00992089	up	1.69652	0.0983545	insig	-0.115532	0.746834	insig	-0.404436	0.579644	insig	0.411222	0.392803	insig	1.72783	3.04288e-05	down
0.570032	0.0759133	insig	0.685781	0.208418	insig	0.113531	0.758022	insig	0.0935114	0.971393	insig	0.602726	0.67569	insig	0.488206	0.114391	insig	PB.1394	-0.0651917	0.950586	insig	0.165943	0.384187	insig	-0.0666356	0.762757	insig	0.236877	0.339891	insig	0.227615	0.12604	insig	0.00325344	0.994677	insig	-1.14273	2.59548e-07	up	-0.500449	0.0961374	insig	-0.663823	0.118654	insig	-0.992188	7.01483e-10	insig
1.06045	0.0114446	up	0.950349	0.240647	insig	0.0587249	0.90148	insig	-0.132523	0.974877	insig	0.924878	0.686885	insig	1.03578	0.020813	up	PB.1396	-0.390512	0.621079	insig	0.0492787	0.888532	insig	-0.34278	0.234058	insig	0.446462	0.258936	insig	0.38725	0.0842157	insig	-0.0474945	0.95468	insig	-2.00494	1.36521e-17	up	-0.547851	0.26942	insig	-1.1448	0.0755268	insig	-1.63264	5.83989e-10	up
-0.609026	0.0744477	insig	0.512228	0.409016	insig	1.14627	0.0658907	insig	1.09986	0.159501	insig	-0.607211	0.870677	insig	-1.72454	0.00406159	down	PB.1398	-0.11655	0.947478	insig	0.690446	0.00909897	insig	-0.171681	0.698349	insig	0.812958	2.75862e-05	insig	0.857668	3.29076e-05	insig	0.0568182	0.932619	insig	0.646797	0.0432026	insig	0.159368	0.613034	insig	0.425389	0.349612	insig	1.92833	0.00393593	down
0.379584	0.197032	insig	0.753676	0.153409	insig	0.623199	0.0718359	insig	0.353077	0.828659	insig	0.157806	0.976989	insig	-0.215046	0.583419	insig	PB.1399	-0.227399	0.85696	insig	-0.378088	0.170622	insig	-0.281411	0.32732	insig	-0.143107	0.79622	insig	-0.101238	0.690372	insig	0.0542895	0.935599	insig	-1.30252	8.34093e-08	up	-0.69032	0.0204215	insig	-0.213885	0.669599	insig	-0.430733	0.178937	insig
-0.182413	0.609329	insig	-0.514391	0.37255	insig	-0.0616935	0.895604	insig	-0.35065	0.844638	insig	-0.422244	0.87515	insig	-0.0960104	0.856625	insig	PB.1401	0.0359878	0.987827	insig	0.19512	0.572762	insig	-0.892093	0.0108568	insig	0.165748	0.762871	insig	1.08224	0.00052927	up	0.930347	0.0516421	insig	-2.37058	8.31225e-26	up	-2.58263	2.06417e-19	up	-3.11758	6.12678e-16	up	-1.56987	5.41185e-05	up
0.911305	0.0183284	insig	1.14763	0.40099	insig	-0.512005	0.0628583	insig	0.214237	0.974877	insig	1.69377	0.601576	insig	1.45711	0.000352431	up	PB.1402	0.0335669	0.989023	insig	0.298963	0.437974	insig	0.773791	0.00452582	insig	0.268881	0.652685	insig	-0.479986	0.109276	insig	-0.736491	0.0800318	insig	-1.20874	2.20735e-07	up	-0.324221	0.525031	insig	-0.400213	0.765032	insig	-2.52479	8.12358e-37	up
-0.0721811	0.856476	insig	-0.352002	0.555296	insig	-0.320614	0.396587	insig	-0.300553	0.869086	insig	-0.00378331	0.998611	insig	0.274637	0.500824	insig	PB.1403	-0.168882	0.950586	insig	-0.931565	0.0208068	insig	-0.236344	0.647322	insig	-0.756914	0.359148	insig	-0.700307	0.15396	insig	0.0682225	0.960714	insig	1.091	5.03668e-05	down	1.19368	0.00730939	down	1.63217	0.000413762	down	0.977044	0.00976539	insig
-0.190787	0.421524	insig	-0.54637	0.0512316	insig	-0.898168	0.00019659	insig	-0.376903	0.567523	insig	0.381497	0.740002	insig	0.736243	0.00524856	insig	PB.1404	-0.432685	0.68005	insig	-1.07301	0.00556349	down	-0.73013	0.0799444	insig	-0.63648	0.203333	insig	-0.348467	0.419193	insig	0.300089	0.557219	insig	0.265035	0.35738	insig	0.512828	0.0494634	insig	0.753958	0.0511087	insig	0.0669058	0.864209	insig
-0.0397341	0.918476	insig	-0.107691	0.846205	insig	0.312804	0.347378	insig	-0.0883002	0.957267	insig	-0.390913	0.780351	insig	-0.325778	0.307577	insig	PB.1408	0.383112	0.677963	insig	-0.308432	0.263839	insig	-0.425497	0.0622633	insig	-0.685292	0.102209	insig	0.111998	0.684082	insig	0.808468	0.0532614	insig	0.608287	0.0120085	insig	0.191213	0.62352	insig	0.770083	0.0212071	insig	1.3168	5.13548e-08	down
-0.0857255	0.703067	insig	-0.0965474	0.860592	insig	-0.248588	0.341867	insig	-0.0316355	0.990359	insig	0.181007	0.964026	insig	0.191121	0.522916	insig	PB.1409	-0.176401	0.86325	insig	-0.812099	0.00149487	insig	-0.0106278	0.971098	insig	-0.630706	0.101362	insig	-0.806671	0.00222251	insig	-0.164378	0.715196	insig	1.04214	7.4493e-11	down	1.13803	1.3567e-07	down	1.71931	6.79216e-06	down	0.773945	0.001541	insig
0.0746065	0.847169	insig	0.692644	0.155268	insig	0.403212	0.298579	insig	0.597283	0.632351	insig	0.316909	0.929614	insig	-0.299431	0.539763	insig	PB.1410	0.523357	0.650483	insig	0.782536	0.00890863	insig	1.47369	1.28235e-06	up	0.262454	0.68983	insig	-0.696532	0.00301129	insig	-0.945712	0.0886716	insig	2.30787	1.71042e-20	down	1.86316	3.23699e-07	down	2.17685	3.22693e-09	down	1.20395	0.000983054	down
0.164433	0.772036	insig	0.831535	0.114855	insig	0.606061	0.275901	insig	0.646091	0.608121	insig	0.255356	0.961951	insig	-0.410003	0.5487	insig	PB.1411	1.90255	0.928078	insig	1.52243	0.73135	insig	3.51488	0.159791	insig	-0.378986	0.953387	insig	-1.9933	0.260371	insig	-1.59806	0.633701	insig	5.4577	5.91557e-09	down	3.71446	0.000758476	down	4.71962	1.15919e-07	down	2.51359	5.1783e-05	down
1.11091	0.000206813	up	1.54849	0.00125736	up	2.56188	1.61053e-11	up	0.41616	0.788892	insig	-0.987565	0.437468	insig	-1.42244	0.000410905	down	PB.1412	1.40422	0.0487629	up	-0.203424	0.770432	insig	0.587038	0.353079	insig	-1.60215	0.000607897	down	-0.796486	0.0588011	insig	0.816052	0.220098	insig	0.890386	0.0189591	insig	0.602577	0.133829	insig	2.60261	5.52385e-10	down	2.83389	5.4757e-10	down
0.880524	0.00366671	insig	1.29288	0.177618	insig	1.38841	3.90798e-06	up	0.390856	0.920599	insig	-0.0686254	0.993405	insig	-0.478163	0.0440141	insig	PB.1414	1.7658	0.00573881	up	-1.28159	0.0195758	down	0.546777	0.419014	insig	-3.04099	2.06254e-12	down	-1.83399	2.50398e-05	down	1.21825	0.0247082	up	1.81262	3.34057e-06	down	0.931621	0.00528308	insig	4.34981	1.75683e-08	down	2.62352	3.51403e-20	down
0.250391	0.219943	insig	-0.250662	0.807072	insig	-0.72293	0.0330431	insig	-0.519947	0.865562	insig	0.507948	0.925407	insig	1.00082	0.00363616	up	PB.1416	0.198792	0.890697	insig	-0.117168	0.812728	insig	0.527615	0.103605	insig	-0.312877	0.510948	insig	-0.650454	0.0257653	insig	-0.324908	0.363191	insig	-0.377157	0.108041	insig	-0.32045	0.149173	insig	-0.54776	0.508498	insig	-1.65651	9.54368e-06	up
1.05578	0.000708493	up	1.58974	0.00489501	up	0.967836	0.0177947	insig	0.512517	0.775134	insig	0.651044	0.777199	insig	0.118421	0.849235	insig	PB.1418	0.22762	0.766969	insig	0.485099	0.018089	insig	0.93337	2.96248e-07	insig	0.262299	0.448792	insig	-0.453278	0.0164102	insig	-0.70301	0.0420413	insig	-1.33473	2.5195e-08	up	-0.501468	0.106307	insig	-0.273731	0.631572	insig	-1.33371	0.000533827	up
-1.49214	2.1648e-08	down	-1.39078	0.000259876	down	-1.21096	0.000369071	down	0.0820991	0.968117	insig	-0.15138	0.978071	insig	-0.257404	0.625298	insig	PB.1419	-0.553597	0.502388	insig	-0.290735	0.541621	insig	-0.622502	0.124408	insig	0.270414	0.61793	insig	0.32752	0.3244	insig	0.069785	0.918858	insig	0.337608	0.268153	insig	-0.595007	0.0854361	insig	-0.802831	0.0412626	insig	-0.27927	0.526587	insig
0.0995463	0.738897	insig	-0.28761	0.675382	insig	-0.882799	0.00162025	insig	-0.407537	0.842324	insig	0.628458	0.758974	insig	1.0118	0.00115147	up	PB.1420	0.293228	0.596102	insig	0.874959	0.00455179	insig	-0.0548317	0.88543	insig	0.589124	0.184789	insig	0.92532	0.00570712	insig	0.350887	0.342607	insig	-0.748536	7.6553e-05	insig	-0.936168	6.6883e-05	insig	-1.95211	0.000129683	up	-1.60634	8.34381e-07	up
-0.310438	0.27237	insig	-0.528774	0.604506	insig	-0.13962	0.782885	insig	-0.238798	0.95175	insig	-0.361791	0.964129	insig	-0.143923	0.802817	insig	PB.1421	0.901904	0.67391	insig	-1.38344	0.140036	insig	-0.11494	0.933812	insig	-2.28015	0.0372896	down	-1.27372	0.253338	insig	1.01426	0.519734	insig	4.21132	1.2886e-37	down	3.00612	5.50996e-12	down	5.03035	8.36641e-10	down	4.15914	1.75556e-13	down
1.81608	0.20705	insig	4.77383	0.016503	up	3.38124	0.0147244	up	2.9275	0.587795	insig	1.4149	0.914689	insig	-1.52039	0.431282	insig	PB.1422	0.538354	0.931848	insig	0.375287	0.762517	insig	3.50794	2.18873e-05	up	-0.162727	0.949732	insig	-3.13789	9.5602e-05	down	-2.9641	0.0197857	down	-1.51319	0.119673	insig	-0.225399	0.903292	insig	2.8384	0.115724	insig	-1.67036	0.274528	insig
-0.490379	0.0213857	insig	-0.713294	0.0912596	insig	-0.473261	0.043575	insig	-0.243033	0.876784	insig	-0.210614	0.948525	insig	0.0108184	0.975883	insig	PB.1423	0.0954674	0.95622	insig	-0.195659	0.619651	insig	-0.415864	0.167479	insig	-0.285399	0.594874	insig	0.21507	0.546931	insig	0.51306	0.320031	insig	1.71105	1.85388e-18	down	1.13025	1.98461e-06	down	1.15444	0.00326347	down	1.62182	4.19102e-14	down
0.593284	0.0349085	insig	1.13978	0.0594766	insig	0.752945	0.000932174	insig	0.525745	0.796083	insig	0.41542	0.903367	insig	-0.132488	0.742174	insig	PB.1424	-0.181728	0.873406	insig	-0.214929	0.407431	insig	0.10183	0.73754	insig	-0.0281433	0.959019	insig	-0.321446	0.0856511	insig	-0.280482	0.547983	insig	-1.01567	2.96244e-07	up	-0.234506	0.507555	insig	0.29576	0.633858	insig	-0.393823	0.064941	insig
1.11299	0.454756	insig	5.73694	0.000494857	up	2.59309	0.0956881	insig	4.60016	0.0372898	up	3.16618	0.377939	insig	-1.44292	0.382705	insig	PB.1425	1.93423	0.227344	insig	0.133396	0.932821	insig	1.56767	0.117594	insig	-1.7858	0.544143	insig	-1.43777	0.486811	insig	0.355304	0.933873	insig	-3.64398	2.25299e-05	up	-4.46766	0.00327862	up	1.91124	0.232831	insig	-2.65701	0.0700519	insig
1.43846	0.235761	insig	0.0552152	0.970738	insig	1.29089	0.0639065	insig	-1.40308	0.542918	insig	-1.20495	0.55035	insig	0.171832	0.879823	insig	PB.1427	1.63241	0.00711022	up	0.547347	0.323996	insig	0.12587	0.866893	insig	-1.08321	0.00309567	down	0.415552	0.195202	insig	1.51103	6.97615e-06	up	1.66412	0.00486935	down	1.47492	0.0273669	down	1.13471	0.105153	insig	2.79723	1.06906e-10	down
0.36699	0.668494	insig	0.520351	0.463766	insig	0.774853	0.367949	insig	0.126975	0.977437	insig	-0.231732	0.984675	insig	-0.371408	0.793488	insig	PB.1428	-0.222463	0.903582	insig	-0.165225	0.756218	insig	0.108494	0.843104	insig	0.0631738	0.919532	insig	-0.277941	0.361716	insig	-0.329365	0.451823	insig	-2.96349	2.90347e-17	up	-2.36562	0.000430671	up	-2.31656	1.02383e-09	up	-2.32628	0.00287171	up
2.10249	0.40842	insig	6.33484	0.000970581	up	4.75164	0.000214028	up	4.19946	0.33095	insig	1.61786	0.820605	insig	-2.5887	0.15948	insig	PB.1429	0.60505	0.918902	insig	-0.462061	0.799218	insig	3.16045	0.00285019	up	-1.06921	0.579616	insig	-3.62937	0.000225136	down	-2.55065	0.0297672	down	-3.29655	0.0117648	up	-1.79166	0.382718	insig	3.45388	0.0288574	down	-1.74696	0.130869	insig
-0.141372	0.714748	insig	-0.938969	0.176552	insig	-1.20187	0.00100391	down	-0.815635	0.612108	insig	0.297017	0.956116	insig	1.08587	0.000733183	up	PB.1432	0.188792	0.819912	insig	0.388421	0.236329	insig	-0.845233	0.000967458	insig	0.207059	0.710165	insig	1.22908	9.27815e-05	up	1.0363	0.00175587	up	-0.47505	0.0812754	insig	-0.799333	0.00115754	insig	-1.83998	0.0011034	up	-0.860652	0.0251574	insig
-0.558968	0.113449	insig	-0.356463	0.472144	insig	-1.20445	0.00112559	down	0.182803	0.908076	insig	0.877354	0.299611	insig	0.671907	0.0894736	insig	PB.1433	0.379207	0.680577	insig	0.310746	0.452998	insig	0.764692	0.0618806	insig	-0.0634985	0.933676	insig	-0.459033	0.26729	insig	-0.384134	0.613812	insig	1.4188	4.39706e-07	down	0.487057	0.202119	insig	0.712951	0.0412093	insig	-0.580566	0.186441	insig
-0.0586143	0.856045	insig	-0.379183	0.348214	insig	-0.571316	0.0246947	insig	-0.3418	0.752532	insig	0.222901	0.929865	insig	0.542416	0.0468786	insig	PB.1434	-0.218406	0.711351	insig	-0.348853	0.136035	insig	-0.0848467	0.813668	insig	-0.126107	0.758393	insig	-0.269219	0.352991	insig	-0.129773	0.806587	insig	-0.771421	2.8931e-05	insig	-0.605329	0.0119295	insig	-0.840836	0.00704793	insig	-1.28804	3.206e-06	up
-0.476611	0.0439083	insig	-0.0958559	0.909015	insig	-0.25381	0.344085	insig	0.360202	0.880933	insig	0.183742	0.976989	insig	-0.196809	0.507768	insig	PB.1435	-0.422428	0.424034	insig	-0.482749	0.04804	insig	-1.06703	2.20711e-08	down	-0.0543773	0.931346	insig	0.579123	0.0162038	insig	0.646074	0.0798648	insig	-0.266589	0.185934	insig	-0.31588	0.279458	insig	0.0810136	0.908023	insig	0.515078	0.0294894	insig
-0.172311	0.712059	insig	-0.0808661	0.90183	insig	0.332321	0.446047	insig	0.0716548	0.973081	insig	-0.385884	0.821309	insig	-0.479643	0.231081	insig	PB.1436	-0.222393	0.860443	insig	0.13356	0.76199	insig	-0.40894	0.212131	insig	0.360936	0.452741	insig	0.53719	0.0638156	insig	0.189978	0.748803	insig	-0.833968	0.00540725	insig	-0.777331	0.0300268	insig	-1.08876	0.000952442	up	-0.122967	0.731647	insig
2.28247	0.0846317	insig	2.12531	0.27659	insig	1.13632	0.534451	insig	-0.184447	0.974644	insig	1.02056	0.860957	insig	1.18385	0.258347	insig	PB.1437	0.0519796	0.993774	insig	0.311029	0.659888	insig	-0.229028	0.779401	insig	0.261158	0.874592	insig	0.535237	0.3877	insig	0.28765	0.888577	insig	-3.50214	6.12875e-05	up	-1.26916	0.213552	insig	-1.7373	0.0277858	up	-2.1784	0.00489607	up
6.3469	0.00142154	up	5.8763	0.0562965	insig	4.884	0.0865448	insig	-0.485976	0.944154	insig	1.02325	0.937595	insig	1.48181	0.316391	insig	PB.1438	3.23085	1.51075e-08	up	-0.478071	0.771742	insig	0.145838	0.907519	insig	-3.70119	7.4747e-05	down	-0.627954	0.65767	insig	3.08746	3.58044e-10	up	-7.15664	5.85022e-06	up	-4.03233	3.95833e-13	up	-0.850046	0.618085	insig	-2.44197	0.0368002	up
0.924367	0.00664982	insig	1.62423	0.00566407	up	1.10089	0.0198604	up	0.677163	0.636046	insig	0.54983	0.852549	insig	-0.146555	0.823514	insig	PB.1439	0.0615646	0.969508	insig	-0.0779686	0.819273	insig	-0.226507	0.429645	insig	-0.133849	0.750195	insig	0.143861	0.56336	insig	0.290499	0.525642	insig	-1.4547	3.29891e-07	up	-0.584022	0.0272354	insig	0.20419	0.724855	insig	-0.158172	0.765766	insig
0.875662	0.0398781	insig	1.43802	0.0864957	insig	1.03921	0.0142358	up	0.540533	0.84234	insig	0.427236	0.932074	insig	-0.134569	0.710311	insig	PB.1444	-0.20494	0.829594	insig	-0.000656412	0.999032	insig	0.691092	0.000376608	insig	0.2088	0.693452	insig	-0.696672	0.00662913	insig	-0.892993	0.0131809	insig	-1.55962	6.11077e-06	up	-0.470824	0.136004	insig	-0.16377	0.846376	insig	-1.24047	2.43971e-10	up
-0.598188	0.0780483	insig	-1.30334	0.0315572	down	-0.695488	0.130698	insig	-0.724778	0.697614	insig	-0.576758	0.867901	insig	0.122504	0.880339	insig	PB.1445	0.787769	0.179808	insig	-0.926753	1.36232e-05	insig	-0.733338	0.00047016	insig	-1.70848	3.67428e-06	down	-0.198635	0.451104	insig	1.521	0.000233443	up	-0.80438	6.57182e-05	insig	-2.18419	6.36809e-08	up	-1.21678	0.0278373	up	-0.794073	0.124121	insig
0.505337	0.078438	insig	-0.0580116	0.929699	insig	0.597659	0.118114	insig	-0.583328	0.542918	insig	-0.624068	0.686317	insig	-0.0624924	0.91262	insig	PB.1446	0.00811071	0.998514	insig	-0.378919	0.247273	insig	-0.156738	0.708551	insig	-0.381983	0.399602	insig	-0.226512	0.295542	insig	0.168797	0.797941	insig	0.286701	0.338872	insig	0.790561	0.0080623	insig	0.569019	0.137631	insig	1.00915	0.00364192	down
0.259511	0.463884	insig	-0.0245854	0.977055	insig	-0.784883	0.0523219	insig	-0.306111	0.881214	insig	0.787462	0.629391	insig	1.07227	0.00146451	up	PB.1447	-0.192076	0.947478	insig	0.136587	0.835085	insig	0.57398	0.283934	insig	0.333764	0.579102	insig	-0.441338	0.0668999	insig	-0.761855	0.168123	insig	-0.107499	0.806389	insig	0.351813	0.377065	insig	-0.311616	0.556711	insig	-1.49359	2.26789e-05	up
0.269722	0.667046	insig	0.843571	0.277782	insig	0.926844	0.0484201	insig	0.55421	0.831373	insig	-0.0543633	0.993405	insig	-0.630554	0.270294	insig	PB.1448	0.380332	0.84914	insig	0.293105	0.451601	insig	-0.512525	0.173913	insig	-0.0780756	0.939522	insig	0.801334	4.89199e-05	insig	0.890176	0.167192	insig	-2.1581	4.61623e-09	up	-2.26302	3.11847e-05	up	-1.65206	0.00129729	up	-0.750858	0.0274458	insig
0.71408	0.0540122	insig	1.16723	0.271275	insig	-0.550435	0.121579	insig	0.430648	0.921047	insig	1.7489	0.358926	insig	1.29613	5.69026e-05	up	PB.1449	-0.422892	0.402556	insig	-0.745033	0.190503	insig	0.124531	0.660182	insig	-0.31942	0.760258	insig	-0.874464	0.13214	insig	-0.544415	0.139337	insig	-0.879958	0.00125677	insig	0.265616	0.500279	insig	0.992628	0.338919	insig	-1.58272	5.06478e-14	up
1.94616	5.71904e-05	up	2.46479	0.00753414	up	2.90116	7.69069e-09	up	0.494511	0.894028	insig	-0.408188	0.955822	insig	-0.922513	0.0627675	insig	PB.1450	0.316663	0.898467	insig	-0.340549	0.659888	insig	1.25428	0.00881094	up	-0.654817	0.435905	insig	-1.6007	0.000754333	down	-0.933307	0.0767398	insig	-1.41116	0.00523557	up	0.226627	0.647895	insig	1.35207	0.110809	insig	0.206201	0.701277	insig
1.32359	0.000242946	up	2.15626	1.8997e-05	up	2.35782	5.1244e-09	up	0.810463	0.455201	insig	-0.174599	0.977682	insig	-1.00366	0.0188159	down	PB.1451	0.116051	0.969508	insig	0.693547	0.140493	insig	0.671923	0.170046	insig	0.582983	0.293648	insig	0.0174432	0.972961	insig	-0.553411	0.343171	insig	0.530021	0.188768	insig	1.74551	1.20753e-07	down	1.95101	6.37829e-06	down	2.18566	1.14815e-07	down
-0.816784	0.00366973	insig	-1.2754	0.000847436	down	-1.34339	1.47579e-08	down	-0.479057	0.71719	insig	0.0955307	0.987331	insig	0.552079	0.126241	insig	PB.1452	0.705857	0.351582	insig	0.581752	0.151215	insig	0.46813	0.258806	insig	-0.116923	0.887112	insig	0.10888	0.805382	insig	0.238291	0.765608	insig	2.51998	4.17306e-29	down	1.0044	0.00865401	down	0.623159	0.153777	insig	0.680044	0.0255068	insig
-0.575259	0.0073865	insig	-1.00882	0.0358301	down	-0.881102	0.00120445	insig	-0.452599	0.764029	insig	-0.0964773	0.991755	insig	0.331294	0.346088	insig	PB.1454	-0.185492	0.833448	insig	0.322767	0.148785	insig	-0.241097	0.41676	insig	0.514449	0.0279173	insig	0.559106	0.00745227	insig	0.0579176	0.918662	insig	0.00109072	0.996346	insig	-0.382443	0.120626	insig	-1.36758	0.00115939	up	-0.668116	0.0458017	insig
-0.49134	0.208583	insig	-0.302107	0.576354	insig	-0.43342	0.30781	insig	0.168324	0.928152	insig	0.161872	0.976311	insig	-0.0287732	0.967668	insig	PB.1456	0.202701	0.905214	insig	0.206672	0.688345	insig	-0.270922	0.568634	insig	0.0108498	0.99123	insig	0.472872	0.27681	insig	0.475858	0.466665	insig	-1.00219	0.000374003	up	-1.68993	3.23596e-06	up	-1.55143	7.16109e-05	up	-1.19624	0.00283676	up
-0.866018	0.15237	insig	-2.13927	0.000284189	down	-2.95959	7.70872e-06	down	-1.2906	0.367228	insig	0.847735	0.810442	insig	2.10824	0.00967853	up	PB.1457	-1.89586	0.653182	insig	-1.05378	0.109624	insig	-2.19015	4.46534e-06	down	0.851072	0.78086	insig	1.13143	0.0573625	insig	0.286956	0.941539	insig	-4.26906	2.9131e-23	up	-3.2311	0.0435205	up	-5.39184	2.21525e-22	up	-5.05671	2.15673e-13	up
0.28529	0.441023	insig	0.829425	0.0725684	insig	0.402232	0.464368	insig	0.523057	0.50985	insig	0.456109	0.864851	insig	-0.0862195	0.908776	insig	PB.1459	0.279284	0.782611	insig	-0.237997	0.597792	insig	0.508007	0.117828	insig	-0.512509	0.333778	insig	-0.75088	0.0338497	insig	-0.226674	0.747131	insig	0.299881	0.35565	insig	0.310798	0.34656	insig	1.32664	0.000203227	down	0.159698	0.781208	insig
-0.811077	0.0387437	insig	-1.80801	0.0618197	insig	-1.81226	4.74672e-07	down	-1.01762	0.726858	insig	0.0360267	0.99657	insig	1.02811	0.010914	up	PB.1461	-0.285212	0.686036	insig	-0.613563	0.0215207	insig	-0.744928	0.0264006	insig	-0.322563	0.483819	insig	0.126758	0.774237	insig	0.46118	0.467739	insig	1.77384	3.51287e-10	down	1.25694	0.000692302	down	0.538567	0.593844	insig	0.680801	0.0959605	insig
-0.00081969	0.998626	insig	-0.348143	0.414923	insig	-0.0591816	0.881297	insig	-0.367475	0.717669	insig	-0.259921	0.929614	insig	0.0849281	0.84639	insig	PB.1462	0.329309	0.826791	insig	0.504039	0.198607	insig	-1.10749	0.00311729	down	0.182653	0.748344	insig	1.60706	3.07143e-13	up	1.43635	5.78159e-05	up	0.0304949	0.927241	insig	-0.293966	0.349256	insig	-0.861874	0.0138324	insig	1.04955	0.000616429	down
-0.497276	0.061059	insig	-0.241623	0.763037	insig	-0.194674	0.56845	insig	0.235437	0.933679	insig	-0.0206089	0.996777	insig	-0.277797	0.493599	insig	PB.1464	-0.0956765	0.947478	insig	-0.0132539	0.971674	insig	-0.0391363	0.909448	insig	0.0880785	0.853117	insig	0.0208253	0.941907	insig	-0.0553864	0.933873	insig	1.06523	4.32912e-09	down	0.668729	0.0302232	insig	0.798025	0.174304	insig	0.880533	0.00505196	insig
-0.260294	0.334067	insig	-0.319169	0.648803	insig	-0.192896	0.615593	insig	-0.0808764	0.977912	insig	-0.0991847	0.992802	insig	-0.0369845	0.950972	insig	PB.1465	-0.163652	0.924208	insig	-0.201472	0.624197	insig	-0.252043	0.549133	insig	-0.031658	0.964944	insig	0.0459078	0.912956	insig	0.0903275	0.921853	insig	1.24132	1.43825e-08	down	1.15116	7.1934e-05	down	1.08438	0.039496	down	1.2687	0.000262033	down
0.442418	0.0645953	insig	0.425295	0.571244	insig	-0.115028	0.638561	insig	-0.0382868	0.992692	insig	0.571493	0.826962	insig	0.587647	0.0187175	insig	PB.1466	0.0306063	0.986182	insig	-0.226707	0.474857	insig	0.218641	0.41881	insig	-0.253257	0.513742	insig	-0.450695	0.0588082	insig	-0.184929	0.617273	insig	-0.925873	2.78411e-07	insig	-0.508574	0.0464567	insig	-0.315424	0.641924	insig	-1.29087	2.16446e-14	up
0.0437272	0.858069	insig	-0.471409	0.547978	insig	-0.963521	0.000733313	insig	-0.53453	0.82235	insig	0.525614	0.884612	insig	1.03441	0.000442507	up	PB.1467	0.0952715	0.917148	insig	-0.0836682	0.72054	insig	-0.31699	0.191337	insig	-0.173526	0.565249	insig	0.228332	0.358802	insig	0.414855	0.262831	insig	-0.241551	0.101394	insig	-0.287293	0.170556	insig	-0.668369	0.304074	insig	-0.917194	0.0101001	insig
1.89289	0.0550427	insig	3.60722	0.0190737	up	3.12638	4.01463e-05	up	1.6837	0.674101	insig	0.499846	0.971555	insig	-1.20124	0.115481	insig	PB.1468	-1.06008	0.286099	insig	0.448033	0.508609	insig	0.966858	0.0778984	insig	1.5137	0.00484294	up	-0.52275	0.239478	insig	-2.02328	2.67412e-06	down	-4.34167	2.25878e-12	up	-1.38179	0.0610288	insig	-1.23612	0.34232	insig	-2.21042	8.9457e-07	up
[truncated: 7,814 more rows]
