# Supplementary material for: Integrated Full-Length Transcriptome and Metabolome Profiling Reveals Flavonoid Regulation in Response to Freezing Stress in Potato
Source: Plants (Basel). 2023 May 22;12(10):2054. doi: 10.3390/plants12102054 (PMC10223400; doi:10.3390/plants12102054)
Supplement: Supplementary file 1 [file plants-12-02054-s001.zip › Table S3.xlsx]

## Sheet: Sheet1
Table S3: Detection of flavonoid metabolites in DM and CM.
Sim id	k-means	Ion mode	Ionization model	Q1 (Da)	Q3 (Da)	Molecular Weight (Da)	Formula	Compounds	Class	CAS	KEGG ID	DM-0h-1	DM-0h-2	DM-0h-3	DM-3h-1	DM-3h-2	DM-3h-3	DM-6h-1	DM-6h-2	DM-6h-3	DM-12h-1	DM-12h-2	DM-12h-3	CM-0h-1	CM-0h-2	CM-0h-3	CM-3h-1	CM-3h-2	CM-3h-3	CM-6h-1	CM-6h-2	CM-6h-3	CM-12h-1	CM-12h-2	CM-12h-3
Sim001	4	Positive	[M]+	417	255	417.12	C21H21O9	Apigeninidin 5-glucoside	Flavone	-	-	498000	530000	510000	474000	525000	559000	980000	1280000	951000	663000	756000	665000	6500	3150	14400	26700	24100	30000	3600	3830	2320	5650	4680	5640
Sim002	4	Positive	[M]+	433.11	271.06	433.11	C21H21O10	Pelargonidin-3-O-glucoside	Anthocyanins	47684-27-5	C12137	320000	407000	362000	363000	233000	551000	589000	649000	639000	315000	385000	412000	17700	14800	12900	32700	6310	19300	10300	16200	14600	6960	12100	18600
Sim003	4	Positive	[M]+	579.17	271.06	579.17	C27H31O14	Pelargonidin-3-O-rutinoside	Anthocyanins	-	C12644	436000	413000	451000	484000	252000	800000	626000	618000	508000	661000	610000	641000	2430	3810	6310	2870	100	1980	4790	6740	1530	1420	100	10200
Sim004	3	Negative	[M-H]-	771.1	609.3	772.1	C33H40O21	Luteolin O-hexosyl-O-hexosyl-O-hexoside	Flavone	-	-	25400	20300	23800	44800	23800	35800	26600	36600	33200	16100	17900	18500	41400	45200	56000	38900	38600	52100	943000	747000	664000	871000	1020000	826000
Sim005	2	Negative	[M-H]-	465	285	466.11	C21H22O12	Taxifolin O-glucoside	Flavanonol	-	-	182000	203000	177000	211000	190000	214000	274000	234000	267000	229000	277000	235000	194000	205000	211000	109000	101000	132000	137000	134000	176000	242000	226000	254000
Sim006	3	Positive	[M]+	757.22	287.06	757.22	C33H41O20	Cyanidin-3-O-rutinoside-5-O-glucoside	Anthocyanins	-	C12646	12400	15700	15600	19500	16000	18000	31200	28100	21500	36600	38300	34400	102000	101000	127000	68400	84800	66400	391000	373000	337000	351000	357000	343000
Sim007	3	Positive	[M]+	757.2	287.06	757.2	C36H37O18	Cyanidin-3-O-(6''-O-p-coumaroyl)glucoside-5-O-glucoside	Anthocyanins	-	-	8710	9820	12700	9320	10500	15700	10200	17200	13000	28000	28000	31400	84000	114000	102000	63600	62400	61500	373000	364000	337000	347000	347000	366000
Sim008	3	Positive	[M+H]+	611.14	287.05	610.13	C30H26O14	Gallocatechin-(4α→8)-gallocatechin	Proanthocyanidins	-	-	73900	51700	58200	44200	78700	77200	134000	125000	94300	193000	175000	206000	127000	133000	125000	45300	66000	56400	184000	176000	239000	177000	193000	205000
Sim009	4	Positive	[M+H]+	741.2	433	740.22	C33H40O19	Kaempferol-3-O-robinoside-7-O-rhamnoside (Robinin)	Flavone	301-19-9	C10178	58000	52600	58200	29900	42400	41100	62900	77900	58900	55800	37600	61800	2210	100	1370	1650	2580	2470	7680	10200	4290	5010	1100	7200
Sim010	4	Positive	[M]+	595.17	287.06	595.17	C27H31O15	Cyanidin-3-O-rutinoside (Keracyanin)	Anthocyanins	28338-59-2	C08620	187000	153000	151000	290000	154000	323000	317000	258000	247000	84700	95100	134000	7370	4610	5080	11000	2570	4340	7470	19400	16900	23900	23200	17200
Sim011	5	Positive	[M+H]+	655.2	331.2	654.18	C29H34O17	Tricin 7-O-hexosyl-O-hexoside	Flavone	-	-	32400	21100	23200	22400	23400	22300	36900	39800	34400	33300	53200	53000	427000	583000	448000	542000	487000	474000	474000	417000	441000	410000	456000	477000
Sim012	5	Positive	[M+H]+	655.2	331.11	654.18	C29H34O17	Tricin 5-O-hexosyl-O-hexoside	Flavone	-	-	27700	20300	21900	14200	19900	6030	27900	22800	29800	26100	39800	29900	637000	627000	656000	583000	696000	563000	734000	522000	550000	495000	428000	632000
Sim013	5	Positive	[M+H]+	447.2	285	446.12	C22H22O10	Biochanin A 7-O-glucoside	Isoflavone	-	-	34300	28200	31100	19100	28900	7320	16400	14100	23000	11500	38900	28300	64400	88700	79800	68200	65100	74900	78900	49900	61500	69100	71800	60800
Sim014	5	Positive	[M+H]+	639.1	477	638.1	C28H30O17	Chrysoeriol O-glucuronic acid-O-hexoside	Flavone	-	-	2210	3090	3110	6310	1390	1140	8980	2240	1150	3130	854	1450	9930	17600	12400	21600	26700	16300	30300	34600	33900	30000	27400	24400
Sim015	4	Positive	[M+H]+	209.2	77	208.09	C15H12O	Chalcone	Chalcone	614-47-1	C01484	732000	755000	487000	1020000	771000	857000	871000	1020000	746000	857000	571000	853000	67800	61500	110000	59100	71200	61900	423000	428000	384000	357000	320000	366000
Sim016	2	Positive	[M+H]+	903.25	741.2	902.24	C39H50O24	Apigenin-7-O-rutinoside-4'-O-Sophoroside	Flavone	-	-	74300	68300	86400	72400	55600	143000	96000	113000	112000	146000	127000	221000	100	100	100	100	100	100	100	100	100	100	100	100
Sim017	6	Positive	[M+H]+	627.16	319.05	626.15	C27H30O17	Myricetin-3-O-galactoside-3'-O-rhamnoside	Flavonol	-	-	8860	3320	11100	21000	4050	7950	11100	12100	2290	4040	8560	5190	818000	803000	848000	493000	488000	502000	1560	38400	38000	16700	14400	8910
Sim018	3	Positive	[M+H]+	743.1	303.05	742.2	C32H38O20	Quercetin-3-pentosylhexoside-7-rhamnoside	Flavonol	-	-	2600	100	3460	3760	2930	2920	2390	2310	2890	1170	2080	2890	83300	119000	86800	98700	80700	88700	1240000	1230000	1360000	1430000	1530000	1370000
Sim019	3	Positive	[M+H]+	743.2	303.05	742.2	C32H38O20	Quercetin-3-O-(2''-O-arabinosyl)rutinoside	Flavonol	-	-	15100	16700	16900	24500	14800	23400	19200	29700	21100	20400	9330	25900	1410000	1320000	1250000	1400000	1230000	1310000	17500000	16400000	17200000	20500000	20600000	18000000
Sim020	6	Positive	[M+H]+	641.16	317.06	640.16	C28H32O17	2'-Hydoxy,5-methoxyGenistein-4',7-O-diglucoside	Isoflavone	-	-	494000	478000	510000	803000	642000	886000	650000	768000	671000	171000	181000	156000	1010000	1030000	769000	355000	412000	478000	22500	24100	20900	13100	21500	14900
Sim021	3	Positive	[M+H]+	713.1	465.2	712.1	C30H32O20	Quercetin 7-O-malonylhexosyl-hexoside	Flavonol	-	-	1920	1570	100	100	100	100	100	100	100	100	100	100	14800	7670	17700	5280	4650	5940	126000	142000	173000	101000	119000	119000
Sim022	2	Negative	[M-H]-	903.27	449.1	904.28	C39H52O24	Eriodictyol-5,3'-Di-O-rutinoside	Flavanone	-	-	156000	172000	181000	259000	106000	471000	288000	282000	328000	385000	392000	327000	100	1140	100	100	100	1070	100	100	100	100	100	2160
Sim023	2	Positive	[M+H]+	887.25	725.21	886.25	C39H50O23	Apigenin-7-O-rutinoside-4'-O-rutinoside	Flavone	-	-	497000	888000	593000	984000	380000	1560000	1010000	1040000	969000	1410000	1360000	1410000	2810	8740	7010	5480	1470	7820	5130	11600	3300	7360	10800	12400
Sim024	4	Positive	[M+H]+	509.3	347.2	508.12	C23H24O13	Syringetin 7-O-hexoside	Flavonol	-	-	122000	125000	95300	182000	139000	239000	132000	104000	132000	28900	43900	42900	44200	70900	57800	52500	77300	60300	9530	5090	8130	7430	10900	21900
Sim025	1	Negative	[M-H]-	607.17	299	608.17	C28H32O15	Chrysoeriol-7-O-rutinoside	Flavone	-	-	490000	519000	510000	1160000	676000	1170000	727000	581000	732000	497000	509000	494000	192000	229000	191000	309000	233000	297000	4380000	3320000	3790000	4000000	4130000	4020000
Sim026	4	Positive	[M+H]+	917.29	755.21	916.28	C40H52O24	Chrysoeriol-5,7-di-O-rutinoside	Flavone	-	-	295000	348000	300000	987000	268000	1330000	662000	717000	708000	732000	660000	728000	216000	245000	173000	71200	72200	78400	3450	6430	6450	6250	12700	5060
Sim027	1	Positive	[M+H]+	465.1	303.1	464.1	C21H20O12	6-Hydroxykaempferol-7-O-glucoside	Flavonol	-	-	4100000	5720000	5490000	8560000	4790000	8840000	4970000	6720000	5750000	2290000	3090000	2020000	1730000	2390000	1380000	1850000	2570000	3270000	13900000	15400000	16200000	19400000	15700000	21900000
Sim028	1	Positive	[M+H]+	465.14	303.09	464.13	C22H24O11	Hesperetin-7-O-glucoside	Flavanone	31712-49-9	C16422	3720000	3920000	3850000	7070000	4740000	10300000	5700000	5670000	4670000	1870000	2010000	1830000	1940000	2140000	928000	2060000	2270000	2150000	14300000	12200000	15000000	14800000	15700000	19200000
Sim029	3	Positive	[M+H]+	757.21	303.05	756.21	C33H40O20	Quercetin-3-O-rutinoside-7-O-rhamnoside	Flavonol	-	-	21000	25300	22000	59800	23600	88600	36700	37500	36600	11100	7140	15100	242000	290000	248000	147000	149000	124000	483000	329000	512000	471000	582000	480000
Sim030	1	Positive	[M+H]+	611.1	302.94	610.15	C27H30O16	Rutin	Flavonol	153-18-4	C05625	4560000	4430000	4120000	8190000	4970000	9360000	5770000	4980000	5460000	2880000	2660000	2640000	1760000	1830000	1960000	2020000	2130000	2000000	17500000	16500000	20000000	20300000	19200000	19500000
Sim031	6	Positive	[M+H]+	947.28	785.22	946.27	C41H54O25	Tricin-4'-O-rutinoside-7-O-rutinoside	Flavone	-	-	28400	31100	24600	51000	25100	56600	76100	88400	79000	61800	84000	81000	7420000	7130000	6420000	2200000	2330000	2390000	70700	93200	86600	67600	60000	99200
Sim032	4	Negative	[M-H]-	449.11	287.06	450.12	C21H22O11	Eriodictyol-3'-O-glucoside	Flavanone	-	-	1120000	1140000	1520000	1940000	1580000	1980000	3410000	3440000	3520000	1480000	1380000	1410000	86300	88600	85400	83700	73600	73600	95100	103000	91200	99600	119000	114000
Sim033	4	Negative	[M-H]-	449.11	287.06	450.12	C21H22O11	Dihydrokaempferol-7-O-glucoside	Flavonol	-	-	1160000	1230000	1500000	1620000	1720000	2060000	3290000	3960000	3340000	1560000	1620000	1400000	92700	68400	84000	81100	69500	66500	116000	109000	87000	103000	118000	112000
Sim034	2	Positive	[M+H]+	787.21	463.1	786.2	C37H38O19	Isoorientin-7-O-(6''-feruloyl)glucoside	Flavone	-	-	9410	19700	12600	15600	18500	23000	14000	12600	19600	26600	19900	21200	17600	27600	26400	18600	6690	17800	2090	100	3330	3850	3120	10800
Sim035	7	Negative	[M-H]-	445	283	446.12	C22H22O10	Glycitin	Isoflavone	40246-10-4	C16195	59300	46200	68700	30800	26900	27900	66100	61400	57900	145000	145000	156000	281000	291000	276000	273000	290000	302000	145000	142000	140000	246000	256000	219000
Sim036	7	Positive	[M+H]+	447.13	285.07	446.12	C22H22O10	Calycosin-7-O-glucoside	Isoflavone	20633-67-4	-	102000	65200	81400	41400	34900	37000	81900	62200	68600	184000	224000	190000	546000	695000	605000	535000	607000	634000	158000	144000	117000	393000	376000	357000
Sim037	6	Negative	[M-H]-	451.12	289.07	452.13	C21H24O11	Sieboldin	Dihydrochalcones	18777-73-6	-	41200	21900	45500	58100	51600	68200	103000	98400	112000	45200	44900	38700	698000	750000	651000	158000	195000	215000	49900	55100	74900	56100	75300	69700
Sim038	4	Negative	[M-H]-	521.09	329.2	522.1	C23H22O14	Tricin-7-O-saccharic acid	Flavone	-	-	4020000	4030000	4460000	4600000	4540000	5900000	3580000	3940000	3800000	2400000	2290000	2190000	235000	245000	221000	166000	166000	204000	208000	193000	183000	253000	269000	262000
Sim039	2	Negative	[M-H]-	461.1	299.2	462.12	C22H22O11	Chrysoeriol 7-O-hexoside	Flavone	-	-	7060000	6850000	6480000	9130000	8470000	7720000	9870000	10900000	10800000	13200000	13500000	13700000	294000	233000	366000	274000	280000	205000	832000	841000	780000	945000	1080000	1040000
Sim040	2	Negative	[M-H]-	461.11	299.1	462.12	C22H22O11	Chrysoeriol-5-O-glucoside	Flavone	-	-	7810000	7410000	7890000	8320000	8270000	8230000	11400000	9880000	11000000	14500000	12800000	12500000	401000	408000	362000	249000	251000	262000	1030000	891000	1020000	1080000	1080000	1140000
Sim041	5	Negative	[M-H]-	491.12	329.1	492.13	C23H24O12	Tricin-5-O-Glucoside	Flavone	32769-00-9	-	1030000	929000	1030000	1370000	1220000	1430000	1290000	1490000	1310000	1180000	1190000	1020000	2070000	2020000	2190000	2130000	1760000	2230000	2200000	2480000	2090000	1930000	2030000	2120000
Sim042	3	Negative	[M-H]-	463.09	300	464.1	C21H20O12	Quercetin-3-O-galactoside (Hyperin)	Flavonol	482-36-0	C10073	298000	344000	336000	1110000	409000	1260000	483000	491000	537000	259000	261000	286000	3770000	3110000	3150000	1250000	1250000	1160000	8350000	8980000	10900000	10300000	9340000	10300000
Sim043	3	Negative	[M-H]-	463.09	300.03	464.1	C21H20O12	Quercetin-3-O-glucoside (Isoquercitrin)	Flavonol	482-35-9	C05623	241000	237000	244000	745000	283000	762000	385000	381000	369000	265000	273000	281000	2750000	2510000	2850000	1240000	933000	949000	5900000	6980000	8340000	6550000	8370000	6570000
Sim044	1	Negative	[M-H]-	463.09	300.7	464.1	C21H20O12	Quercetin-7-O-glucoside	Flavonol	491-50-9	C12639	757000	889000	884000	3500000	873000	4060000	1170000	1360000	1210000	580000	649000	581000	1760000	1580000	1950000	726000	701000	792000	4220000	4550000	5110000	5170000	5350000	4470000
Sim045	4	Negative	[M-H]-	507.08	331.05	508.09	C22H20O14	Mearnsetin-3-O-glucuronide	Flavonol	-	-	131000	151000	150000	140000	143000	162000	148000	150000	166000	82500	105000	95700	1180	1320	1870	1050	3420	3370	1350	2060	2070	1690	3080	1140
Sim046	6	Positive	[M+H]+	493.13	331.08	492.13	C23H24O12	Tricin-7-O-Glucoside	Flavone	32769-01-0	-	14500000	14900000	13900000	15900000	15500000	15700000	16000000	16100000	16600000	10300000	10900000	10700000	18200000	17700000	17800000	15900000	17800000	18900000	17800000	15500000	18500000	13200000	13800000	14500000
Sim047	5	Positive	[M+H]+	567.3	405.2	566.3	C26H30O14	Tricin O-glycerylhexoside	Flavone	-	-	21200	18200	20300	9140	10900	8350	14100	11700	7100	10200	12500	7640	28600	27500	28900	38500	36100	33900	34200	34100	35800	29100	36700	57000
Sim048	5	Positive	[M+H]+	477.4	315	476.13	C23H24O11	Irisolidone 7-O-beta-d-glucoside	Isoflavone	-	-	227000	211000	219000	234000	207000	194000	255000	250000	230000	335000	311000	325000	17700000	16900000	16500000	19200000	18700000	20200000	24100000	19200000	29000000	25500000	24200000	23700000
Sim049	3	Negative	[M-H]-	593.15	285.04	594.16	C27H30O15	Kaempferol-3-O-rutinoside(Nicotiflorin)	Flavonol	17650-84-9	C21833	858000	794000	889000	706000	883000	1040000	1340000	1220000	1410000	1770000	1890000	1670000	1670000	2010000	2180000	929000	922000	951000	6250000	8050000	7240000	5610000	6420000	6390000
Sim050	3	Positive	[M+H]+	449	287.1	448.1	C21H20O11	Luteolin 7-O-glucoside	Flavone	5373-11-5	C03951	180000	223000	244000	59000	96400	72600	163000	142000	310000	197000	263000	314000	676000	648000	695000	340000	353000	298000	1610000	2300000	1960000	2200000	2130000	1840000
Sim051	3	Positive	[M+H]+	449.11	287.06	448.1	C21H20O11	Luteolin-3'-O-glucoside	Flavone	5154-41-6	-	224000	416000	240000	296000	284000	262000	562000	340000	465000	293000	320000	462000	1290000	969000	1340000	520000	523000	553000	5650000	2930000	4100000	2820000	3220000	1830000
Sim052	3	Positive	[M+H]+	449.11	287.06	448.1	C21H20O11	Kaempferol-3-O-glucoside (Astragalin)	Flavonol	480-10-4	C12249	248000	386000	255000	240000	206000	448000	288000	359000	266000	303000	293000	620000	1300000	1050000	1090000	586000	438000	419000	3310000	3100000	2720000	2340000	2970000	3510000
Sim053	3	Positive	[M+H]+	595.17	287.05	594.16	C27H30O15	Kaempferol-3-O-neohesperidoside	Flavonol	32602-81-6	-	2120000	1960000	1900000	1760000	1810000	1890000	2550000	2000000	2080000	2280000	2390000	2140000	8940000	8160000	7180000	3990000	4330000	3310000	20900000	25000000	24500000	16800000	21800000	16300000
Sim054	3	Positive	[M+H]+	595.17	449.1	594.16	C27H30O15	Luteolin-7-O-neohesperidoside (Lonicerin)	Flavone	25694-72-8	C12630	48200	58800	59000	40600	68800	68800	64100	100000	70800	80200	87700	73300	140000	162000	150000	81200	75800	75500	558000	512000	573000	518000	482000	455000
Sim055	3	Positive	[M+H]+	595.3	449.1	594.16	C27H30O15	Kaempferol 3-O-glucoside-2'-O-rhamnoside	Flavonol	-	-	60700	47500	54700	48800	64000	57300	70400	100000	85600	88200	102000	87000	168000	159000	174000	76600	99300	75100	552000	582000	577000	391000	512000	488000
Sim056	3	Positive	[M+H]+	449	287	448.1	C21H20O11	Kaempferol 3-O-galactoside (Trifolin)	Flavonol	23627-87-4	C12626	273000	199000	304000	143000	226000	182000	216000	336000	290000	306000	336000	372000	942000	1170000	1150000	653000	514000	459000	3380000	3310000	3620000	2290000	3990000	1890000
Sim057	3	Positive	[M+H]+	433	287	432.11	C21H20O10	Kaempferol 3-O-rhamnoside (Kaempferin)	Flavonol	482-39-3	C16911	9120	23700	8730	20200	22200	21500	20000	23100	34100	20500	12800	28200	44000	32600	50300	25100	28500	23400	136000	148000	159000	137000	158000	113000
Sim058	7	Positive	[M+H]+	509.2	347.1	508.12	C23H24O13	Syringetin 5-O-hexoside	Flavonol	-	-	8100	13900	4770	32300	27800	10700	5820	40100	23800	12900	12400	28100	89700	86800	99100	98200	95000	106000	28500	52700	41200	36300	40200	50500
Sim059	4	Negative	[M-H]-	625.2	316	626.15	C27H30O17	Myricetin 3-O-rutinoside	Flavonol	-	-	336000	374000	417000	686000	490000	748000	539000	627000	590000	188000	181000	198000	16500	13900	15100	12100	16100	14600	94900	94100	98600	94900	107000	82100
Sim060	4	Positive	[M+H]+	479.1	317.1	478.12	C22H22O12	Selgin 5-O-hexoside	Flavone	-	-	836000	964000	879000	2560000	997000	2180000	569000	1280000	904000	462000	359000	331000	120000	71000	176000	152000	104000	68600	368000	292000	455000	696000	488000	829000
Sim061	4	Negative	[M-H]-	623.16	315.05	624.17	C28H32O16	Tamarixetin-3-O-rutinoside	Flavonol	-	-	3050000	3910000	4310000	6690000	5670000	9100000	5820000	6140000	6280000	1730000	2040000	1970000	204000	201000	154000	161000	148000	137000	1130000	1190000	950000	899000	1300000	996000
Sim062	4	Positive	[M+H]+	625.18	317.07	624.17	C28H32O16	Tamarixetin-3-O-glucoside-7-O-rhamnoside	Flavonol	-	-	13700000	15500000	14600000	21900000	17700000	25600000	18600000	21100000	20000000	7290000	7400000	7120000	998000	1030000	970000	854000	872000	840000	5840000	5690000	6250000	6900000	6320000	6060000
Sim063	7	Positive	[M+H]+	433.1	271.1	432.11	C21H20O10	Apigenin 7-O-glucoside	Flavone	578-74-5	C04608	360000	463000	458000	315000	453000	340000	374000	424000	398000	324000	351000	309000	423000	407000	391000	682000	563000	616000	356000	313000	364000	430000	438000	322000
Sim064	3	Positive	[M+H]+	581.2	383.2	580.2	C26H28O15	Luteolin O-hexosyl-O-pentoside	Flavone	-	-	6070	3290	3990	6430	6190	3320	3660	2970	3620	3690	5380	5210	14700	5100	10700	6780	11800	13200	27800	30200	22900	38700	34900	36600
Sim065	4	Positive	[M+H]+	451.12	289.08	450.12	C21H22O11	Dihydrokaempferol-3-O-glucoside	Flavonol	1049-08-8	-	3560000	4260000	3680000	3960000	4980000	2900000	3710000	4290000	4260000	3120000	3030000	3400000	253000	246000	276000	1290000	1170000	1170000	199000	170000	178000	489000	493000	361000
Sim066	4	Positive	[M+H]+	433	271	432.11	C21H20O10	Genistein 7-O-Glucoside (Genistin)	Isoflavone	529-59-9	C09126	287000	439000	322000	324000	396000	236000	448000	375000	422000	242000	353000	303000	150000	149000	118000	237000	268000	200000	126000	123000	123000	181000	132000	138000
Sim067	4	Positive	[M+H]+	641.1	479.1	640.16	C28H32O17	Selgin O-hexosyl-O-hexoside	Flavone	-	-	83300	79800	78000	108000	78700	131000	115000	147000	110000	72000	83500	75800	6970	5970	6790	6960	6880	8970	3710	3340	3390	5690	7000	3630
Sim068	4	Negative	[M-H]-	579.2	271.01	580.18	C27H32O14	Naringenin 7-O-neohesperidoside (Naringin)	Flavanone	10236-47-2	C09789	176000	171000	172000	176000	196000	206000	232000	294000	231000	146000	162000	158000	44400	53300	45100	19100	16900	16100	1540	4030	2880	3940	3510	2950
Sim069	4	Negative	[M-H]-	579.2	271	580.18	C27H32O14	Naringenin 7-O-rutinoside (Narirutin)	Flavanone	14259-46-2	C09793	78300	71500	71100	84800	88500	94200	119000	129000	135000	84500	93100	98000	32500	30200	31100	10100	10200	12800	2160	3450	3210	2020	3510	3450
Sim070	5	Negative	[M-H]-	549.09	505.11	550.1	C24H22O15	Quercetin-3-O-(6''-malonyl)galactoside	Flavonol	-	-	81700	87400	79800	85700	72300	59300	63800	72800	72300	59000	57800	58500	1060000	1020000	1110000	471000	396000	352000	781000	1040000	1170000	1080000	1140000	827000
Sim071	5	Negative	[M-H]-	503.1	341.1	504.1	C24H24O12	Chrysoeriol O-acetylhexoside	Flavone	-	-	7940	2150	9140	7820	3110	5550	2350	3330	3980	7150	12300	8130	198000	132000	168000	86500	102000	102000	170000	212000	175000	91400	108000	108000
Sim072	5	Negative	[M-H]-	505.1	300.03	506.11	C23H22O13	Quercetin-3-O-(6''-acetyl)galactoside	Flavonol	-	-	7690	1210	1130	1820	1370	797	8930	1140	8860	3730	1320	2040	654000	848000	694000	239000	179000	267000	556000	472000	668000	397000	659000	430000
Sim073	5	Positive	[M+H]+	551	303.1	550.1	C24H22O15	Tricetin O-malonylhexoside	Flavanone	-	-	4300	5060	1840	3690	6000	6820	2760	13500	6590	1730	4580	5510	757000	932000	827000	338000	358000	394000	929000	1050000	1320000	946000	1110000	863000
Sim074	5	Positive	[M+H]+	579.1	331.1	578.1	C26H22O15	Tricin O-malonylhexoside	Flavone	-	-	29500	23000	31200	31700	18900	40500	29300	35500	45500	21600	21800	26600	57500	39400	50500	80900	41300	66000	79900	79700	47000	74800	67100	74500
Sim075	3	Positive	[M+H]+	447.09	271.07	446.08	C21H18O11	Baicalin	Flavone	21967-41-9	C10025	5350	4640	8100	5670	7420	6950	4910	4540	8660	1760	4630	3790	53800	47000	47000	53700	44700	47800	119000	108000	127000	125000	130000	103000
Sim076	6	Positive	[M+H]+	535.1	331.1	534.11	C25H22O13	Tricin 5-O-acetylglucoside	Flavone	-	-	13400	22600	20300	12600	15500	17000	22700	24300	24600	19700	33600	19400	62100	66400	62100	4120	8050	5630	5240	9050	11100	23200	21900	23500
Sim077	4	Negative	[M-H]-	435.13	166.7	436.14	C21H24O10	Phloretin-2'-O-glucoside (Phlorizin)	Dihydrochalcones	60-81-1	C01604	64400	74200	71000	133000	64600	162000	117000	108000	110000	93800	118000	105000	14100	19800	20000	8420	7750	14400	5970	5640	8010	7620	8910	10600
Sim078	5	Negative	[M-H]-	505.1	329.1	506.11	C23H22O13	Tricin O-glucuronic acid	Flavone	-	-	100	2490	844	707	961	1720	1920	2420	1800	766	1680	3030	13500	12000	10400	16700	15600	13200	20400	22900	19400	19400	19000	20100
Sim079	6	Positive	[M+H]+	535.1	287.06	534.1	C24H22O14	Luteolin O-malonylhexoside	Flavone	-	-	14400	6910	11800	10200	13600	21300	14800	16700	17000	24700	25400	13400	866000	992000	902000	393000	387000	412000	314000	271000	281000	210000	233000	184000
Sim080	5	Negative	[M-H]-	519.11	315.05	520.12	C24H24O13	Isorhamnetin-3-O-(6''-acetylglucoside)	Flavonol	-	-	13500	14300	11400	23800	23200	19600	21000	22400	19900	10800	14600	12400	706000	608000	624000	335000	376000	358000	379000	367000	526000	311000	275000	303000
Sim081	5	Positive	[M+H]+	579.17	271.07	578.16	C27H30O14	Apigenin-7-O-neohesperidoside (Rhoifolin)	Flavone	17306-46-6	C12627	8640	2070	2120	2080	1810	3610	8290	2640	5310	9470	3030	4420	311000	226000	263000	178000	193000	204000	336000	310000	231000	286000	327000	260000
Sim082	4	Negative	[M-H]-	433.1	271	434.12	C21H22O10	Naringenin 7-O-glucoside (Prunin)	Flavanone	529-55-5	C09099	92500	118000	105000	192000	93000	236000	125000	155000	141000	142000	152000	150000	71500	76700	76300	48900	47400	37100	35600	33800	39100	49300	42000	46400
Sim083	6	Negative	[M-H]-	435.13	273.08	436.14	C21H24O10	Dihydrocharcone-4'-O-glucoside	Dihydrochalcones	-	-	9030	10600	7120	34000	6660	41400	5610	10000	13800	4730	14000	11500	186000	215000	268000	61100	71200	84900	41900	36100	50400	40800	50000	38100
Sim084	2	Negative	[M-H]-	429.1	267	430.13	C22H22O9	Formononetin 7-O-glucoside (Ononin)	Isoflavone	486-62-4	C10509	39100	52500	58100	68100	73300	64800	91400	87800	84700	81500	85000	76100	68900	70700	79000	31700	21200	27100	37000	30600	35000	70700	82400	77600
Sim085	2	Negative	[M-H]-	287.1	259	288.06	C15H12O6	Aromadedrin (Dihydrokaempferol)	Flavonol	480-20-6	C00974	173000	175000	183000	225000	85200	309000	346000	353000	325000	3580000	3630000	3780000	170000	175000	184000	89800	86600	102000	40000	39400	41100	44600	42700	44900
Sim086	5	Positive	[M+H]+	521	273	520.12	C24H24O13	Naringenin O-malonylhexoside	Flavanone	-	-	3970	4600	5680	7400	6230	7680	5810	7250	9880	5590	6040	6700	24500	21300	22100	13000	11900	16200	20600	19400	17600	24900	22300	23800
Sim087	6	Positive	[M+H]+	565	317	564	C25H24O15	Selgin O-malonylhexoside	Flavone	-	-	44700	59400	49300	99500	69100	113000	108000	86900	103000	13900	12900	12800	156000	203000	229000	94900	95500	98500	114000	130000	144000	89200	83000	90400
Sim088	5	Negative	[M-H]-	503.08	459.1	504.09	C23H20O13	Kaempferol-3-O-(2''-O-acetyl)glucuronide	Flavonol	-	-	202000	224000	193000	125000	181000	71100	221000	155000	191000	242000	134000	240000	6570000	6440000	6330000	4950000	4340000	4610000	5810000	5360000	4750000	5710000	6030000	5470000
Sim089	4	Positive	[M+H]+	417.1	255.1	416.1	C21H20O9	Chrysin 5-O-glucoside (Toringin)	Flavone	-	-	47000	48200	43700	42600	72800	35900	66900	76200	94900	42400	46200	41800	10800	13900	13100	5340	100	100	3730	4580	6140	1700	5780	100
Sim090	2	Negative	[M-H]-	739.19	593.14	740.22	C33H40O19	Luteolin-7-O-rutinoside-5-O-rhamnoside	Flavone	-	-	21100	22300	21200	22500	8810	46100	23300	23200	25200	58700	53000	52400	27500	31800	35600	10800	10700	11200	784	1160	1720	2040	2570	2450
Sim091	4	Negative	[M-H]-	287.06	135	288.06	C15H12O6	Eriodictyol (5,7,3',4'-Tetrahydroxyflavanone)	Flavanone	552-58-9	C05631	14000	16900	16100	49900	8030	76700	15200	13900	18100	11100	8570	11900	5720	8130	6990	9760	11100	9350	4700	5340	8800	17400	18500	12300
Sim092	5	Positive	[M+H]+	447.1	285	446.12	C22H22O10	Sissotrin	Isoflavone	5928-26-7	C05376	1840	2550	2010	1730	3640	1770	1850	1330	4250	789	5710	1700	25200	34900	30700	25700	26500	31400	37300	31300	32300	28800	26300	24900
Sim093	5	Negative	[M-H]-	271.06	151	272.07	C15H12O5	Naringenin (5,7,4'-Trihydroxyflavanone)	Flavanone	480-41-1	C00509	5460	6540	5360	14000	3770	18800	5030	5530	4930	6800	7200	6740	16000	14400	17700	14400	11400	12600	8410	9930	10700	19900	21600	17200
Sim094	2	Negative	[M-H]-	315.05	151	316.06	C16H12O7	Isorhamnetin	Flavonol	480-19-3	C10084	18300	17800	16400	30900	35200	29700	48500	44500	46500	71600	59100	63600	13600	10700	10500	5150	3640	3310	476	1190	1420	22400	23100	22600
Sim095	5	Negative	[M-H]-	703.1	329.2	704.1	C35H28O16	Tricin O-oxalic acid O-coumaroyl shikimic acid	Flavone	-	-	100	100	100	100	100	100	100	100	100	100	100	100	69300	64900	66900	52100	59800	37000	67100	55600	62300	46900	53800	52300
Sim096	7	Positive	[M+H]+	343.12	313.08	342.11	C19H18O6	5,6,7,4'-Tetramethoxyflavone	Flavone	1168-42-9	C14472	801	100	100	954	100	100	930	1130	1820	1700	1670	2190	1310	1870	100	1640	1420	1390	1860	1770	2250	1680	987	1390
Sim097	7	Positive	[M+H]+	373.13	312.1	372.12	C20H20O7	Sinensetin (5,6,7,3',4'-pentamethoxyflavone)	Flavanone	2306-27-6	C10186	654	646	406	606	100	2600	100	513	1450	1790	1820	1490	2450	2390	2620	3170	3200	3310	2020	1650	1510	996	632	1130
Sim098	7	Positive	[M+H]+	403.14	373.1	402.13	C21H22O8	Nobiletin (5,6,7,8,3',4'-Hexamethoxyflavone)	Flavone	478-01-3	C10112	17100	22500	20500	15800	17000	44200	28600	32400	38600	47600	48400	48500	36600	40700	42200	50400	50800	54300	58500	54200	58700	33000	34400	34200
Sim099	7	Positive	[M+H]+	433.15	403.11	432.14	C22H24O9	3,5,6,7,8,3',4'-Heptamethoxyflavone	Flavonol	1178-24-1	-	1930	1490	795	1250	2630	2800	882	1350	1320	3720	3580	2370	4480	3760	2820	5640	6800	8070	4270	4810	5380	3810	3260	3660
Sim100	4	Positive	[M+H]+	287.12	151.07	286.12	C17H18O4	Cochinchinenin A (4'-Hydroxy-2,6-dimethoxydihydrochalcone)	Dihydrochalcones	221696-69-1	-	11500	10100	10900	14600	11200	14300	10500	7930	8470	7930	11600	11100	2170	2510	5400	4020	5850	4960	5620	3570	3710	3250	1770	3080
