# Supplementary material for: Integrated Full-Length Transcriptome and Metabolome Profiling Reveals Flavonoid Regulation in Response to Freezing Stress in Potato
Source: Plants (Basel). 2023 May 22;12(10):2054. doi: 10.3390/plants12102054 (PMC10223400; doi:10.3390/plants12102054)
Supplement: Supplementary file 1 [file plants-12-02054-s001.zip › Table S4.xlsx]

## Sheet: Sheet1
Table S4: Differential accumulated metabolites at different time points.
			DM-3h VS DM-0h			DM-6h VS DM-0h			DM-12h VS DM-0h			DM-6h VS DM-3h			DM-12h VS DM-6h			DM-12h VS DM-3h			CM-3h VS CM-0h			CM-6h VS CM-0h			CM-12h VS CM-0h			CM-6h VS C-M3h			CM-12h VS C-M6h			CM-12h VS CM-3h
Sim id	Compounds	Class	FC	VIP	TYPE	FC	VIP	TYPE	FC	VIP	TYPE	FC	VIP	TYPE	FC	VIP	TYPE	FC	VIP	TYPE	FC	VIP	TYPE	FC	VIP	TYPE	FC	VIP	TYPE	FC	VIP	TYPE	FC	VIP	TYPE	FC	VIP	TYPE
Sim001	Apigeninidin 5-glucoside	Flavone	1.013	0.11707	insig	2.08778	1.54862	up	1.35501	0.691325	insig	2.06098	1.55388	up	0.649019	0.856924	insig	1.33761	0.671899	insig	3.1684	1.68506	up	0.405405	0.736415	insig	0.704158	0.18738	insig	0.127953	1.61605	down	1.73692	1.4279	insig	0.222244	1.38988	down
Sim002	Pelargonidin-3-O-glucoside	Anthocyanins	1.05326	0.560923	insig	1.7236	1.34272	insig	1.02112	0.0538794	insig	1.63644	1.22468	insig	0.592435	0.983535	insig	0.969486	0.0418123	insig	1.28888	0.0681967	insig	0.905286	0.200977	insig	0.844493	0.369723	insig	0.702384	0.0701471	insig	0.932847	0.401698	insig	0.655217	0.24862	insig
Sim003	Pelargonidin-3-O-rutinoside	Anthocyanins	1.18154	0.626743	insig	1.34769	0.949767	insig	1.47077	0.793003	insig	1.14062	0.600092	insig	1.09132	0.307375	insig	1.24479	0.489906	insig	0.35498	1.85554	down	1.04064	0.0591375	insig	1.38884	0.0184785	insig	2.93154	1.24081	up	1.33461	0.0585515	insig	3.91246	1.28769	up
Sim004	Luteolin O-hexosyl-O-hexosyl-O-hexoside	Flavone	1.50216	1.02933	insig	1.38705	0.946246	insig	0.755396	0.632764	insig	0.923372	0.244328	insig	0.544606	1.04516	insig	0.502874	0.981365	insig	0.815217	0.600894	insig	16.5077	1.81245	up	17.8506	1.92687	up	20.2495	1.95218	up	1.08135	0.361879	insig	21.8968	1.99251	up
Sim005	Taxifolin O-glucoside	Flavanonol	1.09431	0.485086	insig	1.379	1.00774	insig	1.31851	0.633867	insig	1.26016	0.84898	insig	0.956129	0.159466	insig	1.20488	0.498056	insig	0.516393	1.31542	insig	0.732787	0.570543	insig	1.21967	0.494052	insig	1.41905	0.61393	insig	1.66443	1.4163	insig	2.3619	1.05085	up
Sim006	Cyanidin-3-O-rutinoside-5-O-glucoside	Anthocyanins	1.22426	0.774299	insig	1.84897	1.37714	insig	2.50114	1.22535	up	1.51028	1.10085	insig	1.35272	0.69643	insig	2.04299	1.09348	up	0.696364	0.904083	insig	3.33636	1.18732	up	3.15455	1.21304	up	4.79112	1.41112	up	0.945504	0.328589	insig	4.53003	1.39441	up
Sim007	Cyanidin-3-O-(6''-O-p-coumaroyl)glucoside-5-O-glucoside	Anthocyanins	1.13737	0.463528	insig	1.29363	0.681306	insig	2.79859	1.29613	up	1.13739	0.377018	insig	2.16337	1.19138	up	2.46059	1.21635	up	0.63	1.04647	insig	3.58	1.2226	up	3.565	1.27537	up	5.68254	1.4875	up	0.99581	0.0266987	insig	5.65873	1.493	up
Sim008	Gallocatechin-(4α→8)-gallocatechin	Proanthocyanidins	1.08868	0.204524	insig	1.9222	1.42311	insig	3.12296	1.36499	up	1.76562	1.29258	insig	1.62468	0.92653	insig	2.86857	1.31575	up	0.433636	1.469	down	1.55584	0.682206	insig	1.48831	0.701792	insig	3.5879	1.26102	up	0.956594	0.158048	insig	3.43217	1.25635	up
Sim009	Kaempferol-3-O-robinoside-7-O-rhamnoside (Robinin)	Flavone	0.671801	1.19857	insig	1.18306	0.606486	insig	0.919431	0.235646	insig	1.76102	1.34137	insig	0.777166	0.559137	insig	1.36861	0.568986	insig	1.72418	1.16543	insig	6.02446	1.44799	up	4.9769	1.41694	up	3.49409	1.17093	up	0.826116	0.374789	insig	2.88652	1.1457	up
Sim010	Cyanidin-3-O-rutinoside (Keracyanin)	Anthocyanins	1.56212	1.0488	insig	1.67413	1.27548	insig	0.639104	0.79805	insig	1.07171	0.395737	insig	0.381752	1.3367	down	0.409126	1.11541	down	1.19314	0.0750733	insig	2.56565	0.913522	insig	3.61372	1.2632	up	2.15033	0.863573	insig	1.4085	0.92484	insig	3.02874	1.20351	up
Sim011	Tricin 7-O-hexosyl-O-hexoside	Flavone	0.887875	0.389917	insig	1.4485	1.03685	insig	1.81877	0.900038	insig	1.63142	1.2984	insig	1.25563	0.463031	insig	2.04846	1.03632	up	1.05864	0.217576	insig	0.91358	0.188816	insig	0.912551	0.191546	insig	0.862974	0.389293	insig	0.998874	0.0148565	insig	0.862002	0.396228	insig
Sim012	Tricin 5-O-hexosyl-O-hexoside	Flavone	0.574106	1.38832	insig	1.15165	0.496795	insig	1.37053	0.599481	insig	2.00598	1.45536	up	1.19006	0.392035	insig	2.38724	1.138	up	0.999219	0.021352	insig	0.940625	0.165896	insig	0.880469	0.333715	insig	0.94136	0.147443	insig	0.936047	0.234028	insig	0.881157	0.316339	insig
Sim013	Biochanin A 7-O-glucoside	Isoflavone	0.591026	1.37805	insig	0.571581	1.31722	insig	0.840812	0.416882	insig	0.967101	0.32872	insig	1.47103	0.438271	insig	1.42263	0.460829	insig	0.858523	0.461428	insig	0.817089	0.367768	insig	0.836625	0.3657	insig	0.951738	0.136522	insig	1.02391	0.143373	insig	0.974494	0.108502	insig
Sim014	Chrysoeriol O-glucuronic acid-O-hexoside	Flavone	1.05113	0.472244	insig	1.47087	0.0473959	insig	0.646136	0.740744	insig	1.39932	0.41467	insig	0.439289	0.664201	insig	0.614706	0.353374	insig	1.81443	1.17071	insig	2.47433	1.01538	up	2.04358	0.914887	insig	1.3637	0.595504	insig	0.825911	0.788976	insig	1.12629	0.29622	insig
Sim015	Chalcone	Chalcone	1.34144	0.918693	insig	1.33587	0.826815	insig	1.15552	0.291561	insig	0.995846	0.0760613	insig	0.864998	0.356729	insig	0.861405	0.350049	insig	0.816757	0.416765	insig	5.16089	1.38798	up	4.53197	1.3876	up	6.31875	1.53229	up	0.878138	0.676136	insig	5.54873	1.48515	up
Sim016	Apigenin-7-O-rutinoside-4'-O-Sophoroside	Flavone	1.18341	0.581298	insig	1.40175	1.01587	insig	2.15721	1.05385	up	1.1845	0.641493	insig	1.53894	0.768356	insig	1.82288	0.885868	insig	1	0.42	insig	1	0.56	insig	1	0.69	insig	1	0.22	insig	1	0.85	insig	1	0.69	insig
Sim017	Myricetin-3-O-galactoside-3'-O-rhamnoside	Flavonol	1.41753	0.473525	insig	1.09493	0.0321188	insig	0.764175	0.272773	insig	0.772424	0.440648	insig	0.697921	0.228963	insig	0.539091	0.538863	insig	0.59599	1.16584	insig	0.0315755	2.0812	down	0.0155589	2.32356	down	0.05298	1.96304	down	0.492753	0.0989183	insig	0.026106	2.17484	down
Sim018	Quercetin-3-pentosylhexoside-7-rhamnoside	Flavonol	1.56006	1.51029	insig	1.23214	1.12616	insig	0.996753	0.565539	insig	0.789802	0.775164	insig	0.808959	0.48443	insig	0.638918	0.761483	insig	0.93082	0.191645	insig	13.248	1.74535	up	14.5278	1.85686	up	14.2326	1.84016	up	1.09661	0.545408	insig	15.6076	1.88097	up
Sim019	Quercetin-3-O-(2''-O-arabinosyl)rutinoside	Flavonol	1.28747	0.766363	insig	1.43737	0.961487	insig	1.1423	0.0791365	insig	1.11643	0.380598	insig	0.794714	0.481378	insig	0.887241	0.278025	insig	0.991206	0.0465514	insig	12.8392	1.73408	up	14.5101	1.85493	up	12.9531	1.80727	up	1.13014	0.62798	insig	14.6388	1.85741	up
Sim020	2'-Hydoxy,5-methoxyGenistein-4',7-O-diglucoside	Isoflavone	1.57287	1.2779	insig	1.40958	1.0526	insig	0.34278	1.32982	down	0.896182	0.417714	insig	0.243179	1.64481	down	0.217932	1.59611	down	0.409576	1.50331	down	0.0240299	2.09243	down	0.0149519	2.32312	down	0.0586701	1.90024	down	0.622222	1.38155	insig	0.0365059	2.06287	down
Sim021	Quercetin 7-O-malonylhexosyl-hexoside	Flavonol	0.0835655	0.88	insig	0.0835655	0.82	insig	0.0835655	0.75	insig	1	0.69	insig	1	0.55	insig	1	0.86	insig	0.370799	1.44839	down	10.9783	1.67772	up	8.21509	1.6401	up	29.6073	2.0743	up	0.748299	0.957304	insig	22.1551	1.99527	up
Sim022	Eriodictyol-5,3'-Di-O-rutinoside	Flavanone	1.64244	0.918574	insig	1.76424	1.37379	insig	2.16896	1.12154	up	1.07416	0.598225	insig	1.2294	0.565609	insig	1.32057	0.586764	insig	0.223881	0.38	insig	0.223881	0.47	insig	2.52985	0.58	insig	1	0.68	insig	11.3	0.55	insig	11.3	1.13753	up
Sim023	Apigenin-7-O-rutinoside-4'-O-rutinoside	Flavone	1.47826	0.829399	insig	1.52629	1.10769	insig	2.11325	1.08564	up	1.03249	0.519298	insig	1.38456	0.787195	insig	1.42955	0.673704	insig	0.561692	0.945884	insig	1.0792	0.0473013	insig	1.59698	0.612282	insig	1.92134	0.688279	insig	1.47978	1.00328	insig	2.84317	1.13808	up
Sim024	Syringetin 7-O-hexoside	Flavonol	1.63599	1.24166	insig	1.07508	0.273625	insig	0.338008	1.3188	down	0.657143	1.03871	insig	0.314402	1.47301	down	0.206607	1.60452	down	1.12608	0.299727	insig	0.131579	1.5321	down	0.254453	1.30696	down	0.116846	1.63974	down	1.93385	1.13679	insig	0.225963	1.3831	down
Sim025	Chrysoeriol-7-O-rutinoside	Flavone	1.97893	1.51335	insig	1.34299	0.932809	insig	0.987492	0.0791119	insig	0.678643	0.943543	insig	0.735294	0.719765	insig	0.499002	0.994348	insig	1.32843	0.753332	insig	18.7745	1.8558	up	19.6569	1.9588	up	14.1328	1.83475	up	1.047	0.247013	insig	14.797	1.86359	up
Sim026	Chrysoeriol-5,7-di-O-rutinoside	Flavone	2.74125	1.50859	up	2.21315	1.63974	up	2.24814	1.15262	up	0.80735	0.385784	insig	1.01581	0.0722316	insig	0.820116	0.000118466	insig	0.339274	1.66099	down	0.0257571	2.07665	down	0.0267587	2.15526	down	0.0759182	1.813	down	1.03889	0.211056	insig	0.0788703	1.80863	down
Sim027	6-Hydroxykaempferol-7-O-glucoside	Flavonol	1.44938	0.962256	insig	1.13912	0.44685	insig	0.483344	1.05227	down	0.78594	0.604666	insig	0.424312	1.25293	down	0.333484	1.29398	down	1.20545	0.476284	insig	8.27273	1.57726	up	11.2636	1.76495	up	6.86275	1.56615	up	1.36154	1.08889	insig	9.34389	1.69658	up
Sim028	Hesperetin-7-O-glucoside	Flavanone	1.92428	1.41491	insig	1.396	1.02022	insig	0.496954	1.07418	down	0.725464	0.728942	insig	0.355985	1.40032	down	0.258254	1.44625	down	1.29692	0.635604	insig	8.28674	1.5764	up	10.1837	1.72105	up	6.38953	1.53417	up	1.22892	0.753411	insig	7.85219	1.62294	up
Sim029	Quercetin-3-O-rutinoside-7-O-rhamnoside	Flavonol	2.5183	1.54347	up	1.62225	1.27196	insig	0.488141	1.04062	down	0.644186	0.692876	insig	0.300903	1.50446	down	0.193837	1.50814	down	0.569231	1.19963	insig	1.69744	0.723354	insig	1.82885	0.87465	insig	2.98198	1.14722	up	1.07742	0.332477	insig	3.21284	1.22535	up
Sim030	Rutin	Flavonol	1.71777	1.2826	insig	1.23646	0.803461	insig	0.623951	0.877046	insig	0.719805	0.81166	insig	0.504627	1.1396	insig	0.363233	1.24178	down	1.12162	0.501651	insig	9.72973	1.63514	up	10.7568	1.74902	up	8.6747	1.65715	up	1.10556	0.517333	insig	9.59036	1.70539	up
Sim031	Tricin-4'-O-rutinoside-7-O-rutinoside	Flavone	1.57788	1.03576	insig	2.89536	1.89549	up	2.69679	1.261	up	1.83497	1.38015	insig	0.931417	0.227037	insig	1.70912	0.852698	insig	0.324034	1.71816	down	0.0119456	2.28423	down	0.0119313	2.39056	down	0.0368653	2.05182	down	0.998802	0.0468873	insig	0.0368212	2.06424	down
Sim032	Eriodictyol-3'-O-glucoside	Flavanone	1.45503	1.13175	insig	2.74339	1.84717	up	1.12963	0.344627	insig	1.88545	1.48406	insig	0.411765	1.30565	down	0.776364	0.600666	insig	0.906454	0.446804	insig	1.11141	0.316459	insig	1.23089	0.492257	insig	1.22611	0.476879	insig	1.1075	0.522562	insig	1.35791	0.609112	insig
Sim033	Dihydrokaempferol-7-O-glucoside	Flavonol	1.38817	1.05231	insig	2.72237	1.83344	up	1.17738	0.435779	insig	1.96111	1.51363	insig	0.432483	1.25863	down	0.848148	0.434655	insig	0.921665	0.255943	insig	1.27295	0.444888	insig	1.31579	0.540173	insig	1.38114	0.578297	insig	1.03365	0.177872	insig	1.42762	0.665806	insig
Sim034	Isoorientin-7-O-(6''-feruloyl)glucoside	Flavone	1.36898	0.905662	insig	1.10765	0.334105	insig	1.62311	0.804884	insig	0.809107	0.636292	insig	1.46537	0.765043	insig	1.18564	0.393853	insig	0.529818	1.17791	insig	0.077095	1.78719	down	0.306913	1.20028	down	0.145512	1.5094	down	3.98098	2.25131	up	0.57928	0.62111	insig
Sim035	Glycitin	Isoflavone	0.491389	1.63883	down	1.06429	0.27063	insig	2.56028	1.23727	up	2.16589	1.64076	up	2.40561	1.29644	up	5.21028	1.67222	up	0.995873	0.0308362	insig	0.503538	0.89836	insig	0.822524	0.483435	insig	0.505625	0.931286	insig	1.63349	1.41647	insig	0.825933	0.480072	insig
Sim036	Calycosin-7-O-glucoside	Isoflavone	0.455752	1.71664	down	0.855591	0.463714	insig	2.40547	1.18496	up	1.87732	1.45238	insig	2.81147	1.39871	up	5.27802	1.6752	up	0.927952	0.267275	insig	0.226977	1.31554	down	0.609426	0.773891	insig	0.2446	1.33512	down	2.68496	2.01069	up	0.656743	0.726255	insig
Sim037	Sieboldin	Dihydrochalcones	1.63812	1.26009	insig	2.88582	1.8656	up	1.186	0.387169	insig	1.76166	1.38929	insig	0.410976	1.30193	down	0.724002	0.681256	insig	0.252263	1.90069	down	0.0857075	1.70151	down	0.0899	1.76089	down	0.339754	1.15656	down	1.04892	0.208663	insig	0.356374	1.14424	down
Sim038	Tricin-7-O-saccharic acid	Flavone	1.20224	0.722053	insig	0.904876	0.503961	insig	0.54996	0.989434	insig	0.75266	0.905983	insig	0.607774	0.972724	insig	0.457447	1.13194	down	0.710414	0.938831	insig	0.833096	0.437398	insig	1.102	0.319681	insig	1.17269	0.422175	insig	1.32277	1.05642	insig	1.5512	0.751028	insig
Sim039	Chrysoeriol 7-O-hexoside	Flavone	1.24179	0.899361	insig	1.54831	1.21038	insig	1.98136	1.06274	insig	1.24684	0.831351	insig	1.2797	0.677823	insig	1.59558	0.882517	insig	0.930571	0.164153	insig	2.74692	1.08235	up	3.33427	1.23548	up	2.95187	1.17387	up	1.21382	0.860152	insig	3.58303	1.28019	up
Sim040	Chrysoeriol-5-O-glucoside	Flavone	1.07399	0.507314	insig	1.3968	1.04491	insig	1.7222	0.939281	insig	1.30056	0.933447	insig	1.23296	0.586871	insig	1.60355	0.884433	insig	0.640478	1.07226	insig	2.51153	1.03686	up	2.84372	1.1586	up	3.92133	1.31706	up	1.13227	0.627648	insig	4.44	1.38452	up
Sim041	Tricin-5-O-Glucoside	Flavone	1.34493	1.04836	insig	1.36835	1.00076	insig	1.13416	0.384369	insig	1.01741	0.133079	insig	0.828851	0.541655	insig	0.843284	0.474502	insig	0.92914	0.319309	insig	1.07803	0.216922	insig	0.967357	0.129284	insig	1.16024	0.358352	insig	0.897341	0.532588	insig	1.04113	0.137451	insig
Sim042	Quercetin-3-O-galactoside (Hyperin)	Flavonol	2.84151	1.74553	up	1.54499	1.20042	insig	0.824131	0.526434	insig	0.543721	1.03897	insig	0.533422	1.09349	insig	0.290032	1.27201	down	0.373878	1.59859	down	2.81456	1.09257	up	3.08076	1.2014	up	7.528	1.59875	up	1.09458	0.438476	insig	8.24	1.64722	up
Sim043	Quercetin-3-O-glucoside (Isoquercitrin)	Flavonol	2.47922	1.61302	up	1.57202	1.24062	insig	1.13435	0.446708	insig	0.634078	0.829225	insig	0.721586	0.788984	insig	0.457542	0.920688	insig	0.401911	1.53861	down	2.61652	1.04691	up	2.42663	1.06698	up	6.5102	1.53659	up	0.927427	0.276115	insig	6.03774	1.52206	up
Sim044	Quercetin-7-O-glucoside	Flavonol	3.3332	1.74684	up	1.47826	1.12162	insig	0.715415	0.717746	insig	0.443496	1.12435	down	0.483957	1.17315	down	0.214633	1.35801	down	0.404631	1.53188	down	2.62382	1.05879	up	2.73346	1.13109	up	6.48447	1.541	up	1.04179	0.210142	insig	6.75543	1.5659	up
Sim045	Mearnsetin-3-O-glucuronide	Flavonol	1.03009	0.238265	insig	1.07407	0.359167	insig	0.655556	0.808933	insig	1.0427	0.236669	insig	0.610345	0.954654	insig	0.636404	0.850644	insig	1.53432	0.492135	insig	1.254	0.364692	insig	0.971396	0.0509926	insig	0.817301	0.0692295	insig	0.774635	0.751985	insig	0.63311	0.399032	insig
Sim046	Tricin-7-O-Glucoside	Flavone	1.08776	0.551517	insig	1.12471	0.611457	insig	0.736721	0.705982	insig	1.03397	0.303255	insig	0.655031	0.900102	insig	0.677282	0.811356	insig	0.941341	0.322055	insig	0.964618	0.123911	insig	0.773743	0.567494	insig	1.02473	0.0693632	insig	0.802124	0.879819	insig	0.821958	0.480478	insig
Sim047	Tricin O-glycerylhexoside	Flavone	0.475544	1.70661	down	0.551089	1.34207	insig	0.508208	1.0278	insig	1.15886	0.331462	insig	0.922188	0.120129	insig	1.06869	0.119268	insig	1.31647	0.84267	insig	1.22471	0.483169	insig	1.51941	0.547301	insig	0.930295	0.27056	insig	1.24063	0.479958	insig	1.15416	0.158606	insig
Sim048	Irisolidone 7-O-beta-d-glucoside	Isoflavone	0.966514	0.222289	insig	1.11872	0.561028	insig	1.47793	0.799489	insig	1.15748	0.629343	insig	1.32109	0.719277	insig	1.52913	0.835699	insig	1.11252	0.50602	insig	1.41487	0.563812	insig	1.44423	0.682385	insig	1.27177	0.432047	insig	1.02075	0.132407	insig	1.29815	0.574533	insig
Sim049	Kaempferol-3-O-rutinoside(Nicotiflorin)	Flavonol	1.03463	0.169624	insig	1.56238	1.21531	insig	2.0976	1.1026	up	1.51008	1.1376	insig	1.34257	0.728827	insig	2.02739	1.0755	up	0.473805	1.3778	down	3.67577	1.2305	up	3.07167	1.19548	up	7.75797	1.61164	up	0.835655	0.711531	insig	6.48298	1.54923	up
Sim050	Luteolin 7-O-glucoside	Flavone	0.352396	2.01213	down	0.950541	0.264553	insig	1.19629	0.359073	insig	2.69737	1.69776	up	1.25854	0.482007	insig	3.39474	1.40608	up	0.514859	1.32013	insig	2.90738	1.10527	up	3.00149	1.18408	up	5.64695	1.47467	up	1.03237	0.153346	insig	5.82973	1.50306	up
Sim051	Luteolin-3'-O-glucoside	Flavone	0.956818	0.0172236	insig	1.55341	1.03645	insig	1.22159	0.389876	insig	1.62352	1.17073	insig	0.786394	0.484336	insig	1.27672	0.485492	insig	0.434704	1.44518	down	3.5232	1.17159	up	1.93804	0.854373	insig	8.10483	1.60282	up	0.550079	1.35546	insig	4.45829	1.36623	up
Sim052	Kaempferol-3-O-glucoside (Astragalin)	Flavonol	1.00562	0.513955	insig	1.027	0.125899	insig	1.36783	0.440098	insig	1.02125	0.275899	insig	1.33187	0.424882	insig	1.36018	0.457399	insig	0.446512	1.43288	down	2.65407	1.06459	up	2.55087	1.06161	up	5.94401	1.50462	up	0.961117	0.212248	insig	5.71289	1.48298	up
Sim053	Kaempferol-3-O-neohesperidoside	Flavonol	0.913043	0.532173	insig	1.1087	0.415685	insig	1.1388	0.419683	insig	1.21429	0.715481	insig	1.02715	0.107188	insig	1.24725	0.594234	insig	0.514003	1.30408	insig	2.89951	1.11337	up	2.04489	0.953125	insig	5.64103	1.482	up	0.705256	1.1613	insig	3.97837	1.33278	up
Sim054	Luteolin-7-O-neohesperidoside (Lonicerin)	Flavone	1.07349	0.15242	insig	1.41506	0.917668	insig	1.45301	0.752724	insig	1.31818	0.740395	insig	1.02682	0.109123	insig	1.35354	0.610377	insig	0.521018	1.301	insig	3.63496	1.23129	up	3.22898	1.225	up	6.97665	1.57288	up	0.888314	0.600125	insig	6.19745	1.53048	up
Sim055	Kaempferol 3-O-glucoside-2'-O-rhamnoside	Flavonol	1.0442	0.242559	insig	1.57152	1.15447	insig	1.70166	0.916659	insig	1.505	1.09577	insig	1.08281	0.245004	insig	1.62963	0.88283	insig	0.526647	1.28403	insig	3.41517	1.20243	up	2.63174	1.10615	up	6.48475	1.54415	up	0.770602	0.983941	insig	4.99716	1.43439	up
Sim056	Kaempferol 3-O-galactoside (Trifolin)	Flavonol	0.710052	0.971308	insig	1.08505	0.244593	insig	1.3067	0.573357	insig	1.52813	1.06275	insig	1.20428	0.469263	insig	1.84029	0.980422	insig	0.536634	1.24622	insig	3.16064	1.16163	up	1.92213	0.897384	insig	5.88975	1.50319	up	0.608147	1.41689	insig	3.58183	1.27639	up
Sim057	Kaempferol 3-O-rhamnoside (Kaempferin)	Flavonol	1.53791	1.1852	insig	1.858	1.29786	insig	1.48014	0.61172	insig	1.20814	0.509483	insig	0.796632	0.446199	insig	0.962441	0.167464	insig	0.63357	0.983061	insig	3.49094	1.2067	up	2.95508	1.16446	up	5.50995	1.47306	up	0.846501	0.714608	insig	4.66418	1.40372	up
Sim058	Syringetin 5-O-hexoside	Flavonol	2.64475	1.76285	up	2.60441	1.16576	up	1.99477	0.876836	insig	0.984746	0.324935	insig	0.765921	0.0867553	insig	0.754237	0.345812	insig	1.05152	0.258722	insig	0.444122	0.953255	insig	0.472424	0.96902	insig	0.42236	1.01931	down	1.06373	0.238246	insig	0.449275	1.00936	down
Sim059	Myricetin 3-O-rutinoside	Flavonol	1.70719	1.35863	insig	1.55812	1.19893	insig	0.503106	1.05387	insig	0.912682	0.325692	insig	0.322893	1.47059	down	0.294699	1.41383	down	0.92967	0.273077	insig	6.32088	1.4737	up	5.83516	1.50465	up	6.79905	1.56381	up	0.923157	0.467984	insig	6.2766	1.53657	up
Sim060	Selgin 5-O-hexoside	Flavone	2.14147	1.45887	up	1.02762	0.0651878	insig	0.430011	1.1695	down	0.479868	1.32237	down	0.418453	1.16421	down	0.200802	1.55685	down	1.04632	0.189907	insig	3.03815	1.1055	up	6.23297	1.52443	up	2.90365	1.13302	up	2.05157	1.67305	up	5.95703	1.51443	up
Sim061	Tamarixetin-3-O-rutinoside	Flavonol	1.90417	1.49803	insig	1.61846	1.24097	insig	0.509317	1.02188	insig	0.849953	0.503017	insig	0.314693	1.489	down	0.267474	1.46724	down	0.829159	0.554794	insig	5.84973	1.43817	up	5.08497	1.44407	up	7.05502	1.57424	up	0.869266	0.601361	insig	6.13269	1.52666	up
Sim062	Tamarixetin-3-O-glucoside-7-O-rhamnoside	Flavonol	1.48858	1.16475	insig	1.36301	1.00151	insig	0.497945	1.07052	down	0.915644	0.336981	insig	0.365327	1.38871	down	0.334509	1.34273	down	0.863576	0.609414	insig	5.93062	1.44756	up	6.48432	1.54997	up	6.86752	1.56678	up	1.09336	0.484909	insig	7.50869	1.60913	up
Sim063	Apigenin 7-O-glucoside	Flavone	0.864949	0.551389	insig	0.933646	0.268435	insig	0.76815	0.592662	insig	1.07942	0.362196	insig	0.822742	0.57566	insig	0.888087	0.276204	insig	1.52948	1.02784	insig	0.846028	0.411336	insig	0.923833	0.219155	insig	0.553146	0.851481	insig	1.09197	0.339883	insig	0.604016	0.781464	insig
Sim064	Luteolin O-hexosyl-O-pentoside	Flavone	1.19401	0.658018	insig	0.76779	0.645905	insig	1.06966	0.168033	insig	0.643036	0.986364	insig	1.39317	0.685374	insig	0.895859	0.150598	insig	0.91377	0.0695996	insig	2.65246	1.03152	up	3.70328	1.26891	up	2.90276	1.14607	up	1.39617	1.11247	insig	4.05274	1.34314	up
Sim065	Dihydrokaempferol-3-O-glucoside	Flavonol	1.02957	0.406135	insig	1.06609	0.300395	insig	0.830435	0.498566	insig	1.03547	0.262031	insig	0.778956	0.657924	insig	0.806588	0.408981	insig	4.76129	2.02536	up	0.705806	0.624977	insig	1.64516	0.75926	insig	0.148238	1.55905	down	2.3309	1.83327	up	0.345528	1.16642	down
Sim066	Genistein 7-O-Glucoside (Genistin)	Isoflavone	0.912214	0.418857	insig	1.18798	0.596723	insig	0.85687	0.31802	insig	1.3023	0.82416	insig	0.721285	0.723417	insig	0.939331	0.110986	insig	1.81655	1.22768	insig	0.892086	0.268054	insig	1.14748	0.287043	insig	0.491089	0.947958	insig	1.28629	0.903344	insig	0.631683	0.750563	insig
Sim067	Selgin O-hexosyl-O-hexoside	Flavone	1.31771	0.851777	insig	1.54293	1.15433	insig	0.959353	0.171398	insig	1.17092	0.549187	insig	0.621774	0.910489	insig	0.728045	0.591714	insig	1.0522	0.249204	insig	0.529143	0.858131	insig	0.708566	0.601565	insig	0.50289	0.934305	insig	1.33908	0.861887	insig	0.67341	0.678409	insig
Sim068	Naringenin 7-O-neohesperidoside (Naringin)	Flavanone	1.11368	0.561463	insig	1.45857	1.07784	insig	0.897881	0.392751	insig	1.30969	0.875148	insig	0.615588	0.932023	insig	0.806228	0.56736	insig	0.378151	1.58939	down	0.0591737	1.83014	down	0.0723739	1.83803	down	0.156481	1.52785	down	1.22308	0.642414	insig	0.191389	1.45795	down
Sim069	Naringenin 7-O-rutinoside (Narirutin)	Flavanone	1.21096	0.837298	insig	1.73382	1.35923	insig	1.24762	0.572855	insig	1.43178	1.10399	insig	0.719582	0.773963	insig	1.03028	0.1134	insig	0.324627	1.72034	down	0.0940299	1.66962	down	0.0874733	1.77532	down	0.289655	1.24685	down	0.930272	0.256743	insig	0.269458	1.29951	down
Sim070	Quercetin-3-O-(6''-malonyl)galactoside	Flavonol	0.873041	0.57918	insig	0.839293	0.721683	insig	0.704299	0.756315	insig	0.961344	0.124343	insig	0.839157	0.546526	insig	0.806719	0.488304	insig	0.40768	1.53276	down	0.937618	0.166571	insig	0.896708	0.286789	insig	2.29988	0.994516	insig	0.956369	0.142057	insig	2.19954	0.990394	insig
Sim071	Chrysoeriol O-acetylhexoside	Flavone	0.856994	0.228519	insig	0.50234	0.941321	insig	1.43422	0.62205	insig	0.586165	1.04476	insig	2.85507	1.35811	up	1.67354	0.789595	insig	0.567771	1.14177	insig	1.11847	0.239748	insig	0.600602	0.747826	insig	1.96994	0.911705	insig	0.536984	1.57026	insig	1.05782	0.166281	insig
Sim072	Quercetin-3-O-(6''-acetyl)galactoside	Flavonol	0.397507	0.955672	insig	1.88734	0.937498	insig	0.706879	0.0166311	insig	4.74793	1.71544	up	0.374538	0.786185	insig	1.77828	0.724264	insig	0.285519	1.80158	down	0.772313	0.470592	insig	0.564891	0.832512	insig	2.70494	1.10368	up	0.731427	1.00228	insig	1.97847	0.929291	insig
Sim073	Tricetin O-malonylhexoside	Flavanone	1.47411	0.963025	insig	2.04018	0.992547	insig	1.05536	0.0380397	insig	1.38401	0.303541	insig	0.517287	0.700135	insig	0.71593	0.564729	insig	0.414944	1.50983	down	1.31121	0.480201	insig	1.0785	0.217278	insig	3.15996	1.19354	up	0.822522	0.689114	insig	2.59914	1.10699	up
Sim074	Tricin O-malonylhexoside	Flavone	1.08841	s	insig	1.3178	0.769123	insig	0.83632	0.417886	insig	1.21076	0.612673	insig	0.634633	0.844927	insig	0.768386	0.398608	insig	1.24355	0.389287	insig	1.40163	0.479845	insig	1.51934	0.692947	insig	1.12711	0.212099	insig	1.08398	0.349521	insig	1.22177	0.425495	insig
Sim075	Baicalin	Flavone	1.10779	0.40382	insig	1.00111	0.0345725	insig	0.562742	0.837059	insig	0.903693	0.385249	insig	0.56212	0.873085	insig	0.507984	0.992214	insig	0.998647	0.0143908	insig	2.39513	1.00881	up	2.31394	1.02852	up	2.39837	1.04894	up	0.966102	0.184051	insig	2.31707	1.03091	up
Sim076	Tricin 5-O-acetylglucoside	Flavone	0.801066	0.671517	insig	1.27176	0.754948	insig	1.2913	0.429667	insig	1.58758	1.23927	insig	1.01536	0.0422066	insig	1.61197	0.755352	insig	0.0957765	2.49418	down	0.133211	1.5408	down	0.367524	1.13443	down	1.39085	0.442671	insig	2.75896	1.99739	up	3.8373	1.31753	up
Sim077	Phloretin-2'-O-glucoside (Phlorizin)	Dihydrochalcones	1.71565	1.15468	insig	1.59828	1.2532	insig	1.51145	0.796759	insig	0.931591	0.290192	insig	0.945672	0.211381	insig	0.880979	0.103013	insig	0.45	1.40205	down	0.364007	1.06572	down	0.50705	0.886726	insig	0.808905	0.43619	insig	1.39297	0.98973	insig	1.12678	0.255869	insig
Sim078	Tricin O-glucuronic acid	Flavone	0.986605	0.847745	insig	1.788	1.5085	insig	1.59464	0.831577	insig	1.81228	1.33301	insig	0.891857	0.381403	insig	1.61629	0.514536	insig	1.34958	0.834949	insig	1.74652	0.793226	insig	1.65042	0.786387	insig	1.29412	0.54435	insig	0.944976	0.313623	insig	1.22291	0.503375	insig
Sim079	Luteolin O-malonylhexoside	Flavone	1.36213	0.750349	insig	1.46481	0.999389	insig	1.91785	0.893618	insig	1.07539	0.338595	insig	1.30928	0.460361	insig	1.40798	0.545515	insig	0.423913	1.49795	down	0.313768	1.16572	down	0.21413	1.40686	down	0.740171	0.605682	insig	0.682448	1.22581	insig	0.505128	0.935905	insig
Sim080	Isorhamnetin-3-O-(6''-acetylglucoside)	Flavonol	1.69898	1.44582	insig	1.6148	1.2529	insig	0.964286	0.107076	insig	0.95045	0.249348	insig	0.597156	0.972066	insig	0.567568	0.951995	insig	0.55031	1.23992	insig	0.656347	0.665038	insig	0.475232	0.972718	insig	1.19269	0.330882	insig	0.724057	0.993598	insig	0.863572	0.410952	insig
Sim081	Apigenin-7-O-neohesperidoside (Rhoifolin)	Flavone	0.584567	0.696237	insig	1.26578	0.625635	insig	1.31878	0.467686	insig	2.16533	1.31105	up	1.04187	0.0415555	insig	2.256	0.92992	insig	0.695625	0.896032	insig	1.09625	0.17245	insig	1.02375	0.0750795	insig	1.57592	0.698154	insig	0.933865	0.224499	insig	1.4717	0.698768	insig
Sim082	Naringenin 7-O-glucoside (Prunin)	Flavanone	1.65135	1.0891	insig	1.33439	0.910273	insig	1.40729	0.726465	insig	0.808061	0.443876	insig	1.05463	0.207639	insig	0.852207	0.151141	insig	0.64343	1.07317	insig	0.483296	0.922425	insig	0.639421	0.755058	insig	0.751125	0.589706	insig	1.32304	1.04754	insig	0.993769	0.0374096	insig
Sim083	Dihydrocharcone-4'-O-glucoside	Dihydrochalcones	3.06766	1.52286	up	1.09944	0.103349	insig	1.13009	0.0566121	insig	0.358396	1.30634	down	1.02788	0.00825823	insig	0.368389	0.867744	insig	0.296637	1.7632	down	0.191928	1.38336	down	0.176906	1.48172	down	0.647014	0.704504	insig	0.921729	0.307822	insig	0.596372	0.806594	insig
Sim084	Formononetin 7-O-glucoside (Ononin)	Isoflavone	1.37742	1.04439	insig	1.76286	1.35152	insig	1.62057	0.857073	insig	1.27983	0.907666	insig	0.919288	0.346126	insig	1.17653	0.487462	insig	0.362992	1.62021	down	0.46935	0.936943	insig	1.01761	0.0613225	insig	1.29301	0.490357	insig	2.16813	1.78114	up	2.8034	1.14767	up
Sim085	Aromadedrin (Dihydrokaempferol)	Flavonol	1.1661	0.649726	insig	1.92844	1.49314	insig	20.6968	2.23971	up	1.65375	1.2337	insig	10.7324	2.13613	up	17.7487	2.22234	up	0.500189	1.34822	insig	0.227788	1.31966	down	0.253781	1.32823	down	0.455404	1.00098	down	1.11411	0.659697	insig	0.50737	0.933974	insig
Sim086	Naringenin O-malonylhexoside	Flavanone	1.49544	1.18639	insig	1.60982	1.11	insig	1.28632	0.566135	insig	1.07649	0.202311	insig	0.799041	0.454981	insig	0.86016	0.411374	insig	0.550074	1.24353	insig	0.848306	0.393831	insig	1.07585	0.24123	insig	1.54217	0.729195	insig	1.26823	0.953298	insig	1.95582	0.927809	insig
Sim087	Selgin O-malonylhexoside	Flavone	1.83572	1.44132	insig	1.94198	1.47163	insig	0.258149	1.48768	down	1.05788	0.317188	insig	0.132931	1.96571	down	0.140625	1.80386	down	0.485714	1.32673	down	0.659864	0.635061	insig	0.458163	0.969181	insig	1.35854	0.586663	insig	0.69433	1.17466	insig	0.943277	0.272694	insig
Sim088	Kaempferol-3-O-(2''-O-acetyl)glucuronide	Flavonol	0.609208	1.30953	insig	0.915994	0.360036	insig	0.995153	0.0778298	insig	1.50358	1.03145	insig	1.08642	0.120134	insig	1.63352	0.741737	insig	0.720527	0.916095	insig	0.823164	0.44699	insig	0.867115	0.421899	insig	1.14245	0.329606	insig	1.05339	0.295671	insig	1.20344	0.47054	insig
Sim089	Chrysin 5-O-glucoside (Toringin)	Flavone	1.08927	0.511272	insig	1.71346	1.29381	insig	0.938805	0.249367	insig	1.57303	1.12397	insig	0.547899	1.03499	insig	0.861864	0.200519	insig	0.215873	2.35547	down	0.382275	1.04485	down	0.0714286	1.96779	down	1.77083	1.179	insig	0.186851	2.83763	down	0.330882	0.382701	insig
Sim090	Luteolin-7-O-rutinoside-5-O-rhamnoside	Flavone	1.1983	0.765215	insig	1.10991	0.548755	insig	2.54025	1.23944	up	0.926237	0.453251	insig	2.2887	1.25768	up	2.11988	1.07302	up	0.339831	1.67172	down	0.0386091	1.96153	down	0.0709694	1.84265	down	0.113612	1.66354	down	1.83816	1.46004	insig	0.208837	1.41978	down
Sim091	Eriodictyol (5,7,3',4'-Tetrahydroxyflavanone)	Flavanone	2.86447	1.30919	up	1.00426	0.00549086	insig	0.671702	0.76324	insig	0.350591	1.11839	down	0.668856	0.813799	insig	0.234495	1.07436	down	1.50144	0.970993	insig	0.904031	0.207927	insig	2.13772	0.946376	insig	0.602109	0.735245	insig	2.36465	1.79504	up	1.42378	0.609081	insig
Sim092	Sissotrin	Isoflavone	1.11563	0.455994	insig	1.16094	0.074989	insig	1.28109	0.0825097	insig	1.04062	0.185161	insig	1.1035	0.124002	insig	1.14832	0.145232	insig	0.862335	0.448576	insig	1.11123	0.244302	insig	0.887115	0.253756	insig	1.28863	0.536072	insig	0.798315	0.87906	insig	1.02874	0.0977521	insig
Sim093	Naringenin (5,7,4'-Trihydroxyflavanone)	Flavanone	2.10657	1.16747	up	0.892281	0.479829	insig	1.1947	0.492144	insig	0.423571	1.17614	down	1.33893	0.736204	insig	0.567132	0.465374	insig	0.804574	0.65545	insig	0.603742	0.74819	insig	1.15696	0.355439	insig	0.750388	0.537161	insig	1.91632	1.61525	insig	1.43798	0.658629	insig
Sim094	Isorhamnetin	Flavonol	1.82476	1.56168	insig	2.65714	1.82293	up	3.70095	1.4672	up	1.45616	1.12746	insig	1.39283	0.769818	insig	2.02818	1.08242	up	0.378879	1.57162	down	0.0886782	1.69035	down	1.93966	0.911522	insig	0.234054	1.32088	down	21.873	3.58847	up	5.11945	1.45077	up
Sim095	Tricin O-oxalic acid O-coumaroyl shikimic acid	Flavone	1	0.23	insig	1	0.78	insig	1	0.68	insig	1	0.58	insig	1	0.71	insig	1	0.58	insig	0.834659	0.650898	insig	0.91994	0.245974	insig	0.73993	0.612992	insig	1.10217	0.257738	insig	0.804324	0.867503	insig	0.886506	0.342508	insig
Sim096	5,6,7,4'-Tetramethoxyflavone	Flavone	1.15285	0.192076	insig	3.87612	2.2098	up	5.55445	1.76266	up	3.36222	2.16747	up	1.43299	0.711454	insig	4.81802	1.73186	up	1.39939	0.964781	insig	1.79268	0.836975	insig	1.40396	0.675383	insig	1.28105	0.49755	insig	0.783163	0.880252	insig	1.00327	0.00419882	insig
Sim097	Sinensetin (5,6,7,3',4'-pentamethoxyflavone)	Flavanone	1.93787	1.03525	insig	1.20926	0.405086	insig	2.98945	1.32857	up	0.624017	0.54726	insig	2.47213	1.33511	up	1.54265	1.00141	insig	1.28083	0.796631	insig	0.69437	0.627403	insig	0.42748	1.04325	down	0.542125	0.868753	insig	0.615637	1.35138	insig	0.333752	1.18795	down
Sim098	Nobiletin (5,6,7,8,3',4'-Hexamethoxyflavone)	Flavone	1.2812	0.601186	insig	1.65724	1.24712	insig	2.40433	1.19966	up	1.29351	0.807985	insig	1.4508	0.81459	insig	1.87662	0.973689	insig	1.27029	0.768202	insig	1.43431	0.641007	insig	0.843515	0.433026	insig	1.12912	0.372333	insig	0.588098	1.47921	insig	0.664032	0.725425	insig
Sim099	3,5,6,7,8,3',4'-Heptamethoxyflavone	Flavonol	1.58482	1.00628	insig	0.842705	0.295876	insig	2.29419	1.09295	up	0.531737	1.21434	insig	2.72241	1.33622	up	1.4476	0.629762	insig	1.68716	1.09938	insig	1.30741	0.475835	insig	1.01311	0.0629872	insig	0.77492	0.509818	insig	0.774896	0.944401	insig	0.600482	0.79739	insig
Sim100	Cochinchinenin A (4'-Hydroxy-2,6-dimethoxydihydrochalcone)	Dihydrochalcones	1.23385	0.783866	insig	0.827692	0.694278	insig	0.942462	0.180277	insig	0.670823	1.0982	insig	1.13866	0.302926	insig	0.76384	0.566072	insig	1.46875	0.812619	insig	1.27976	0.39952	insig	0.941964	0.0351497	insig	0.871327	0.245085	insig	0.736047	0.881882	insig	0.641337	0.699285	insig
