# Supplementary material for: Integrated Full-Length Transcriptome and Metabolome Profiling Reveals Flavonoid Regulation in Response to Freezing Stress in Potato
Source: Plants (Basel). 2023 May 22;12(10):2054. doi: 10.3390/plants12102054 (PMC10223400; doi:10.3390/plants12102054)
Supplement: Supplementary file 1 [file plants-12-02054-s001.zip › Table S5.xlsx]

## Sheet: Sheet1
Table S5: The expression level of CHI, CHS, CHS, F3H, F3'H, FLS, three UDP- glycosyltransferases, and four transcriptional factors in DM and CM.
Gene_id	Description	Type	DM-0h	DM-3h	DM-6h	DM-12h	CM-0h	CM-3h	CM-6h	CM-12h
PB.6202	chalcone synthase (CHS)-1	Gene	3.9741	14.407	49.4998	24.0999	197.839	159.384	593.512	302.948
PB.6202.1	chalcone synthase (CHS)-1	isoform	0.061652	0.46995	0.98127	1.381	3.88693	3.41986	16.5867	4.22129
PB.6202.2	chalcone synthase (CHS)-1	isoform	3.91244	13.9371	48.5185	22.7188	193.952	155.964	576.925	298.727
PB.10213	chalcone synthase (CHS)-2	Gene	2.30828	3.0219	8.3614	8.50934	29.04	15.6363	17.5146	20.8955
PB.5571	chalcone isomerase (CHI)-1	Gene	32.2573	39.5875	52.7307	39.6604	183.347	145.753	292.875	141.999
PB.6140	chalcone isomerase (CHI)-2	Gene	10.5914	40.5987	60.8726	41.3458	397.426	343.059	852.428	237.631
PB.2541	naringenin 3-dioxygenase (F3H)	Gene	21.2869	22.7831	53.8057	50.0496	399.605	254.355	570.256	232.963
PB.3984	Flavonoid 3'-monooxygenase (F3'H)-1	Gene	6.34484	29.2768	95.3222	36.5531	102.88	65.4489	627.479	74.6092
PB.3984.5	Flavonoid 3'-monooxygenase (F3'H)-1	isoform	0	0	0	0	0.334656	0.981841	7.80876	0.43032
PB.3984.7	Flavonoid 3'-monooxygenase (F3'H)-1	isoform	0.25961	0.334993	1.18297	0.540047	0.982194	0.161324	7.63902	0.443798
PB.3984.10	Flavonoid 3'-monooxygenase (F3'H)-1	isoform	0.0616007	0.314752	1.85525	0.279363	1.22075	0.230079	3.15438	1.56734
PB.3984.12	Flavonoid 3'-monooxygenase (F3'H)-1	isoform	3.24578	15.8737	57.3347	23.045	53.886	38.0033	332.313	38.1927
PB.3984.16	Flavonoid 3'-monooxygenase (F3'H)-1	isoform	0.250825	0.137382	0.57879	0.562112	2.01327	0.780737	16.5259	1.84534
PB.3984.17	Flavonoid 3'-monooxygenase (F3'H)-1	isoform	0.638465	7.21018	5.40632	4.66338	14.2011	5.72147	23.9735	12.4816
PB.3984.18	Flavonoid 3'-monooxygenase (F3'H)-1	isoform	1.10413	5.15207	27.8446	7.17237	30.0261	19.2962	235.584	19.3307
PB.9164	Flavonoid 3'-monooxygenase (F3'H)-2	Gene	4.93614	3.80774	8.60695	13.8024	52.2574	34.8755	48.9205	68.3407
PB.11511	flavonol synthase (FLS)	Gene	16.2937	36.1512	50.9623	74.1897	754.431	528.556	1478.91	246.579
PB.4502	O-glucosyltransferase	Gene	0.327041	0.391664	0.486164	0.197568	1.9993	1.17127	3.21758	2.3695
PB.10917	4-beta-mannosyltransferase	Gene	0.945132	3.3608	6.55702	8.43565	2.29337	2.92979	8.87585	4.85897
PB.12527	beta-1,3-galactosyltransferase	Gene	2.7324	4.18191	5.15354	5.90358	3.609	5.47695	13.2467	6.62676
PB.5667	MYB-related (MYB1)	Gene	0.930007	1.42335	4.15277	3.61489	3.62619	3.60853	12.5005	7.91764
PB.6144	DREB2C	Gene	12.2602	14.539	4.14055	8.70044	15.8726	17.6929	3.7756	5.89378
PB.8048	ERF054	Gene	16.0701	4.49799	9.62748	27.7541	7.6303	9.484	2.67632	6.80078
PB.10502	ERF4	Gene	105.07	64.2234	96.1283	118.935	47.185	83.1152	11.6889	40.0375
