# Supplementary material for: Integrated Full-Length Transcriptome and Metabolome Profiling Reveals Flavonoid Regulation in Response to Freezing Stress in Potato
Source: Plants (Basel). 2023 May 22;12(10):2054. doi: 10.3390/plants12102054 (PMC10223400; doi:10.3390/plants12102054)
Supplement: Supplementary file 1 [file plants-12-02054-s001.zip › Table S6.xlsx]

## Sheet: Sheet1
Table S6: Primers for quantitative PCR in DM and CM.
Gene_id	Transcript_id	Description	Primer orientation	Primer sequence
PB.3984	PB.3984.5	Flavonoid 3'-monooxygenase (F3'H)-1	forward	ccatgtccgacagaacttgtttat
PB.3984	PB.3984.5	Flavonoid 3'-monooxygenase (F3'H)-1	reverse	cttccaaataagccaattgggc
PB.3984	PB.3984.7	Flavonoid 3'-monooxygenase (F3'H)-1	forward	gtgttggagttattttgtgttagcc
PB.3984	PB.3984.7	Flavonoid 3'-monooxygenase (F3'H)-1	reverse	aggatagagcggttgaaatcttag
PB.3984	PB.3984.12	Flavonoid 3'-monooxygenase (F3'H)-1	forward	agctttacttttgaacttgtttatagctg
PB.3984	PB.3984.12	Flavonoid 3'-monooxygenase (F3'H)-1	reverse	atggcttccaaataagccaattg
PB.3984	PB.3984.16	Flavonoid 3'-monooxygenase (F3'H)-1	forward	ttatttggcctaattacaacggcag
PB.3984	PB.3984.16	Flavonoid 3'-monooxygenase (F3'H)-1	reverse	tcgataccgttagtaccgtcg
PB.6202	PB.6202.1	chalcone synthase (CHS)-1	forward	agttttccatttaatgcaggtgataaat
PB.6202	PB.6202.1	chalcone synthase (CHS)-1	reverse	gcacttcaaccaccactatatcttg
PB.6202	PB.6202.2	chalcone synthase (CHS)-1	forward	ctactatcatggccataggcac
PB.6202	PB.6202.2	chalcone synthase (CHS)-1	reverse	caaccaccactatatcttgcc
