# Supplementary material for: Integrated Full-Length Transcriptome and Metabolome Profiling Reveals Flavonoid Regulation in Response to Freezing Stress in Potato
Source: Plants (Basel). 2023 May 22;12(10):2054. doi: 10.3390/plants12102054 (PMC10223400; doi:10.3390/plants12102054)
Supplement: Supplementary file 1 [file plants-12-02054-s001.zip › Table S7.xlsx]

## Sheet: Sheet1
Table S7: Correlation between different glycosyltransferases and glycosylated flavonoid derivatives.
Gene_id	Description	Sim id	Compounds	Correlation	P-Value
PB.4502	O-glucosyltransferase	Sim008	Gallocatechin-(4α→8)-gallocatechin	0.87182	0.00100888
PB.4502	O-glucosyltransferase	Sim029	Quercetin-3-O-rutinoside-7-O-rhamnoside	0.820919	0.00360299
PB.4502	O-glucosyltransferase	Sim051	Luteolin-3'-O-glucoside	0.812147	0.00431359
PB.4502	O-glucosyltransferase	Sim056	Kaempferol 3-O-galactoside (Trifolin)	0.810196	0.00448427
PB.4502	O-glucosyltransferase	Sim073	Tricetin O-malonylhexoside	0.834988	0.00264451
PB.10917	4-beta-mannosyltransferase	Sim021	Quercetin 7-O-malonylhexosyl-hexoside	0.83756	0.00249161
PB.10917	4-beta-mannosyltransferase	Sim036	Calycosin-7-O-glucoside	-0.801352	0.00531924
PB.10917	4-beta-mannosyltransferase	Sim053	Kaempferol-3-O-neohesperidoside	0.822344	0.00349603
PB.10917	4-beta-mannosyltransferase	Sim056	Kaempferol 3-O-galactoside (Trifolin)	0.804406	0.00501939
PB.12527	beta-1,3-galactosyltransferase	Sim021	Quercetin 7-O-malonylhexosyl-hexoside	0.845224	0.00207378
PB.12527	beta-1,3-galactosyltransferase	Sim034	Isoorientin-7-O-(6''-feruloyl)glucoside	-0.820792	0.0036126
PB.12527	beta-1,3-galactosyltransferase	Sim035	Glycitin	-0.897733	0.000422283
PB.12527	beta-1,3-galactosyltransferase	Sim036	Calycosin-7-O-glucoside	-0.89012	0.000557445
PB.12527	beta-1,3-galactosyltransferase	Sim053	Kaempferol-3-O-neohesperidoside	0.825748	0.00324983
PB.12527	beta-1,3-galactosyltransferase	Sim055	Kaempferol 3-O-glucoside-2'-O-rhamnoside	0.818923	0.00375669
PB.12527	beta-1,3-galactosyltransferase	Sim056	Kaempferol 3-O-galactoside (Trifolin)	0.853273	0.0016921
PB.12527	beta-1,3-galactosyltransferase	Sim057	Kaempferol 3-O-rhamnoside (Kaempferin)	0.806505	0.00482038
